# Supplementary material for: Aberrant expression of junctional adhesion molecule‐A contributes to the malignancy of cervical adenocarcinoma by interaction with poliovirus receptor/CD155
Source: PubMed Central journal article supplement — Cancer Sci. 2020 Dec 5;112(2):906–17. doi: 10.1111/cas.14734 (PMC7893988; doi:10.1111/cas.14734), 2020-12-05
Supplement: CAS-112-906-s001.pdf [file CAS-112-906-s001.pdf]

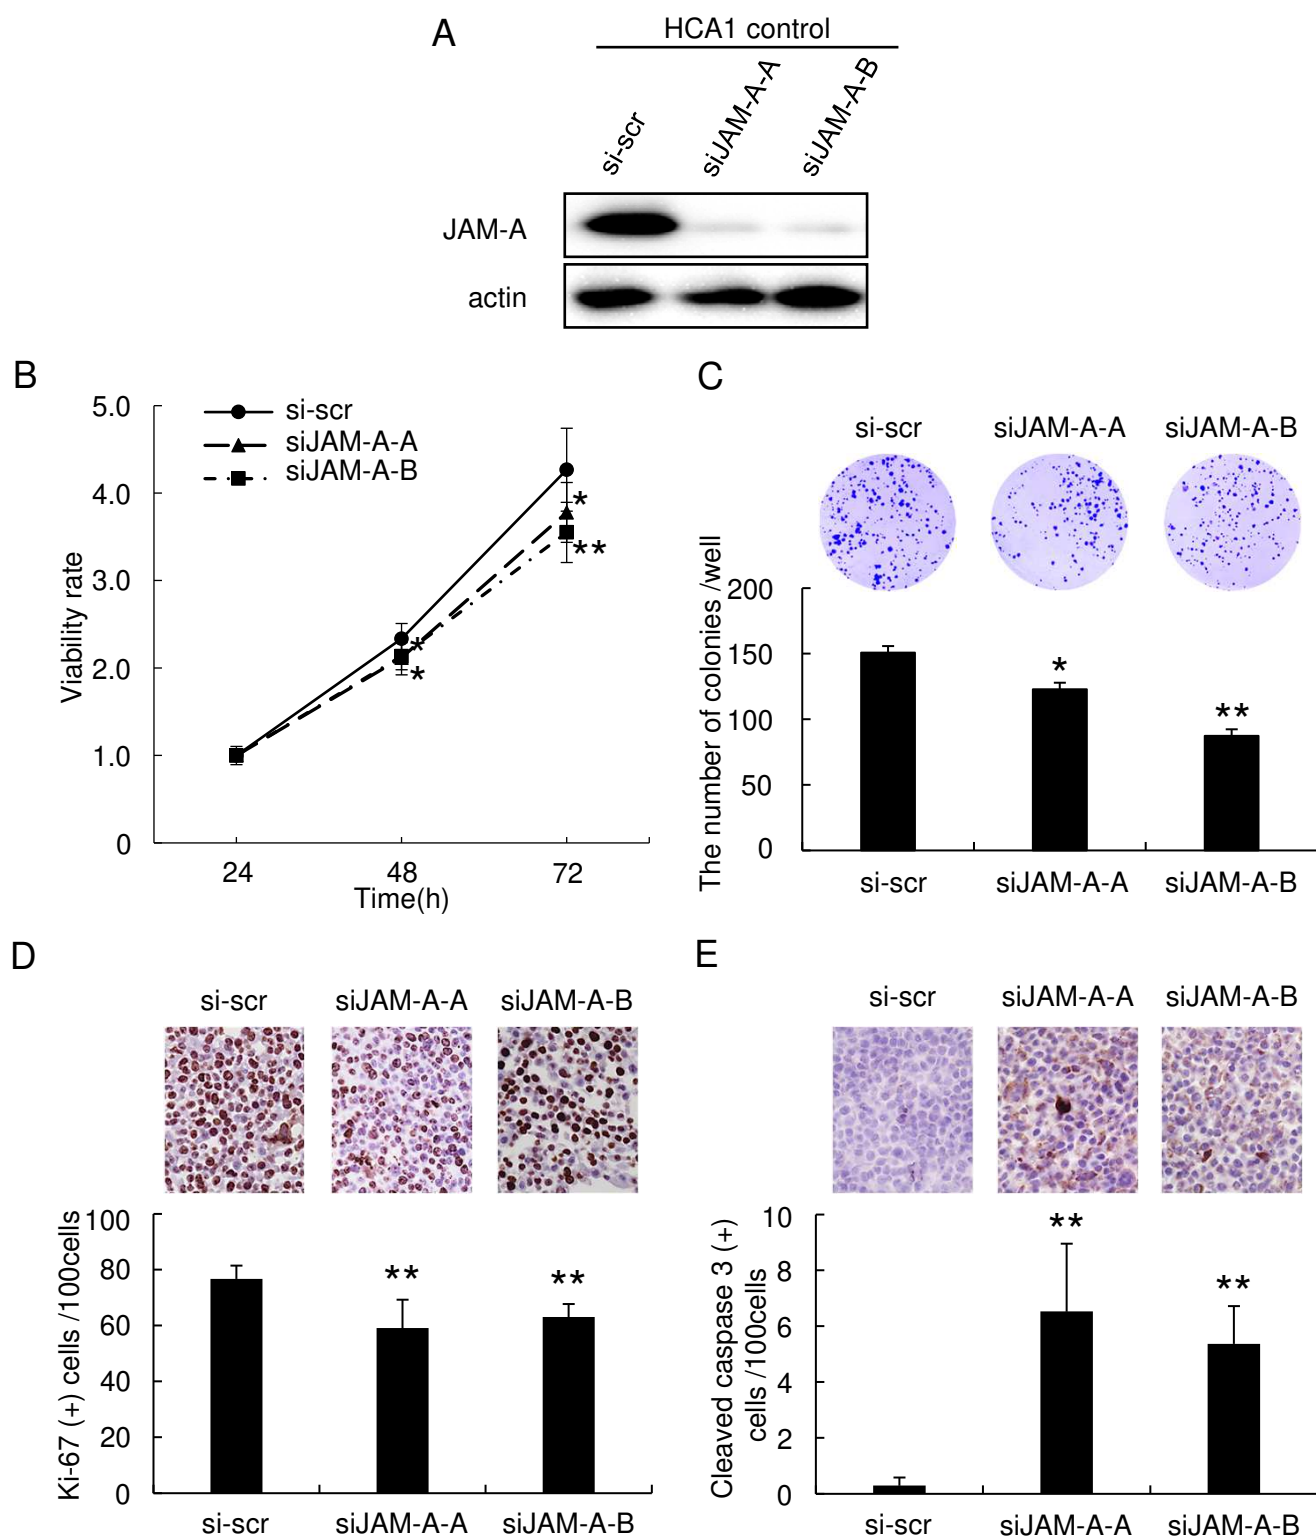

Fig. S1. Knockdown of JAM-A inhibits malignant potentials of cervical adenocarcinoma cells. (A) Knockdown (KD) of JAM-A expression was achieved by JAM-A-specific siRNAs compared to scrambled-siRNA (scr) in HCA1 cells. Western blotting. (B-D) JAM-A-siRNAs significantly reduced the proliferation ability of HCA1 cells in a WST-8 assay (B) and a colony formation assay (C) and immunostaining with anti-Ki-67 (proliferation marker) antibody (D). (E) Immunostaining with anti-cleaved caspase 3 (apoptosis marker) antibody.
