# Supplementary material for: Aberrant expression of junctional adhesion molecule‐A contributes to the malignancy of cervical adenocarcinoma by interaction with poliovirus receptor/CD155
Source: PubMed Central journal article supplement — Cancer Sci. 2020 Dec 5;112(2):906–17. doi: 10.1111/cas.14734 (PMC7893988; doi:10.1111/cas.14734), 2020-12-05
Supplement: CAS-112-906-s002.pdf [file CAS-112-906-s002.pdf]

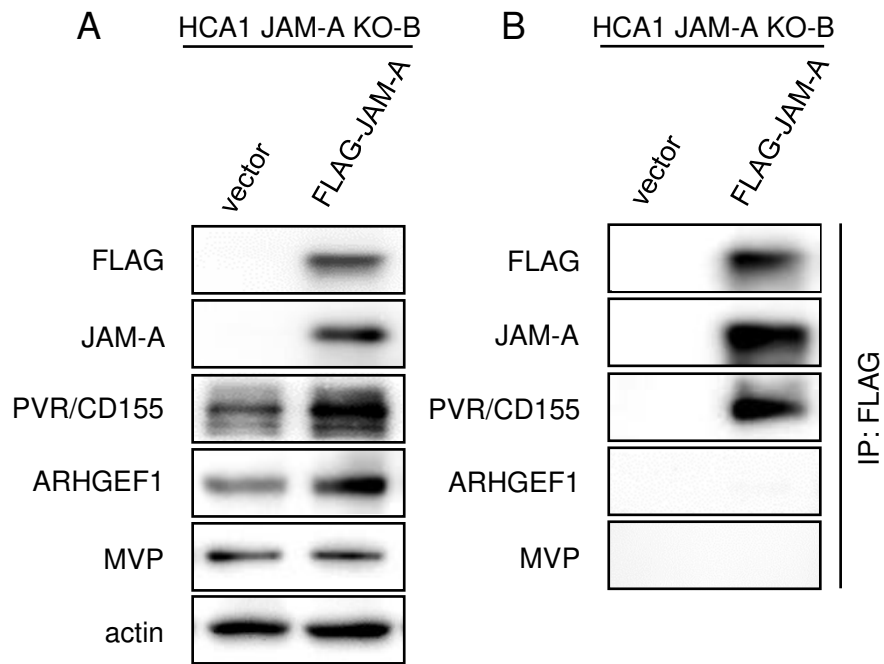

Fig. S2. PVR/CD155 was identified as a candidate molecule directly interacting with JAM-A. (A) The expression of PVR/CD155 and ARHGEF1 was increased by transfection of an N-terminal 3xFLAG-tagged JAM-A plasmid in JAM-A KO-B cells. (B) Immunoprecipitation (IP) assay. PVR/CD155 was detected in immunoprecipitation with an anti-FLAG antibody from N-terminal 3xFLAG-tagged JAM-A-expressing JAM-A KO-B cells.
