# Supplementary material for: Aberrant expression of junctional adhesion molecule‐A contributes to the malignancy of cervical adenocarcinoma by interaction with poliovirus receptor/CD155
Source: PubMed Central journal article supplement — Cancer Sci. 2020 Dec 5;112(2):906–17. doi: 10.1111/cas.14734 (PMC7893988; doi:10.1111/cas.14734), 2020-12-05
Supplement: CAS-112-906-s007.pdf [file CAS-112-906-s007.pdf]

| No. | Accession | Description                                                                | Sum PEP Score | Coverage [%] | # Peptides | # PSMs | # Unique Peptides | Score Mascot: A5 Mascot | Score Sequest HT: A2 Sequest HT | # Peptides (by Search Engine): A2 Sequest HT | # Peptides (by Search Engine): A5 Mascot | # Razor Peptides | ctrl Abundance s_1 | ctrl Abundance s_2 | ctrl Abundance s_3 | ctrl Abundance s_4 | JAM-A KO Abundance s_1 | JAM-A KO Abundance s_2 | JAM-A KO Abundance s_3 | JAM-A KO Abundance s_4 |
|-----|-----------|----------------------------------------------------------------------------|---------------|--------------|------------|--------|-------------------|-------------------------|---------------------------------|----------------------------------------------|------------------------------------------|------------------|--------------------|--------------------|--------------------|--------------------|------------------------|------------------------|------------------------|------------------------|
| 1   | Q15149-1  | plectin [OS=Homo sapiens]                                                  | 2088.5        | 54           | 208        | 9145   | 4                 | 130257                  | 12847                           | 206                                          | 207                                      | 201              | 1.50.E+10          | 1.50.E+10          | 1.54.E+10          | 1.51.E+10          | 1.26.E+10              | 1.31.E+10              | 1.31.E+10              | 1.31.E+10              |
| 2   | Q09666-1  | Neuroblast differentiation-associated protein AHNAK [OS=Homo sapiens]      | 2086.0        | 65           | 199        | 8536   | 199               | 89526                   | 10776                           | 199                                          | 194                                      | 0                | 1.37.E+10          | 1.34.E+10          | 1.40.E+10          | 1.31.E+10          | 1.26.E+10              | 1.26.E+10              | 1.31.E+10              | 1.26.E+10              |
| 3   | Q15149-4  | Isoform 4 of Plectin [OS=Homo sapiens]                                     | 1636.7        | 55           | 207        | 4611   | 2                 |                         | 12917                           | 207                                          |                                          | 0                | 1.44.E+08          | 1.44.E+08          | 1.45.E+08          | 1.52.E+08          | 1.19.E+08              | 1.33.E+08              | 1.32.E+08              | 1.13.E+08              |
| 4   | P49327    | Fatty acid synthase [OS=Homo sapiens]                                      | 1436.3        | 60           | 106        | 7224   | 105               | 118921                  | 11958                           | 106                                          | 105                                      | 1                | 1.48.E+10          | 1.51.E+10          | 1.50.E+10          | 1.48.E+10          | 1.08.E+10              | 1.09.E+10              | 1.07.E+10              | 1.06.E+10              |
| 5   | P21333    | Filamin-A [OS=Homo sapiens]                                                | 1392.4        | 57           | 108        | 6121   | 101               | 94126                   | 9209                            | 108                                          | 108                                      | 7                | 6.45.E+09          | 6.53.E+09          | 6.48.E+09          | 6.40.E+09          | 1.16.E+10              | 1.15.E+10              | 1.16.E+10              | 1.16.E+10              |
| 6   | Q9Y490    | Talin-1 [OS=Homo sapiens]                                                  | 1279.4        | 58           | 95         | 5375   | 88                | 109118                  | 8687                            | 95                                           | 95                                       | 8                | 8.19.E+09          | 8.13.E+09          | 7.83.E+09          | 8.10.E+09          | 9.82.E+09              | 9.72.E+09              | 9.66.E+09              | 9.89.E+09              |
| 7   | P35579-1  | Myosin-9 [OS=Homo sapiens]                                                 | 1229.4        | 53           | 97         | 5159   | 81                | 93256                   | 8017                            | 96                                           | 96                                       | 15               | 7.18.E+09          | 7.13.E+09          | 7.24.E+09          | 6.80.E+09          | 9.53.E+09              | 9.57.E+09              | 9.17.E+09              | 9.41.E+09              |
| 8   | P05783    | Keratin, type I cytoskeletal 18 [OS=Homo sapiens]                          | 1110.7        | 81           | 47         | 10535  | 44                | 209848                  | 16983                           | 47                                           | 45                                       | 4                | 8.39.E+10          | 8.32.E+10          | 8.42.E+10          | 8.72.E+10          | 4.37.E+10              | 4.44.E+10              | 4.49.E+10              | 4.40.E+10              |
| 9   | Q13813    | Spectrin alpha chain, non-erythrocytic 1 [OS=Homo sapiens]                 | 1078.1        | 54           | 101        | 3621   | 101               | 58038                   | 5203                            | 101                                          | 97                                       | 0                | 4.43.E+09          | 4.33.E+09          | 4.40.E+09          | 4.39.E+09          | 4.90.E+09              | 4.86.E+09              | 4.80.E+09              | 4.94.E+09              |
| 10  | Q14204    | Cytoplasmic dynein 1 heavy chain 1 [OS=Homo sapiens]                       | 1069.0        | 41           | 131        | 4252   | 131               | 52296                   | 5907                            | 131                                          | 131                                      | 0                | 4.69.E+09          | 5.05.E+09          | 5.00.E+09          | 5.27.E+09          | 6.15.E+09              | 6.15.E+09              | 5.78.E+09              | 5.95.E+09              |
| 11  | P55072    | Transitional endoplasmic reticulum ATPase [OS=Homo sapiens]                | 1065.9        | 85           | 68         | 9027   | 68                | 151749                  | 14363                           | 67                                           | 66                                       | 0                | 2.67.E+10          | 2.75.E+10          | 2.62.E+10          | 2.59.E+10          | 2.98.E+10              | 3.04.E+10              | 2.93.E+10              | 2.95.E+10              |
| 12  | Q43707    | Alpha-actinin-4 [OS=Homo sapiens]                                          | 1028.6        | 76           | 67         | 6793   | 45                | 101498                  | 10378                           | 66                                           | 66                                       | 22               | 1.62.E+10          | 1.67.E+10          | 1.55.E+10          | 1.61.E+10          | 1.59.E+10              | 1.62.E+10              | 1.60.E+10              | 1.60.E+10              |
| 13  | P07900    | Heat shock protein HSP 90-alpha [OS=Homo sapiens]                          | 1024.4        | 75           | 67         | 10382  | 43                | 163720                  | 16657                           | 65                                           | 65                                       | 25               | 3.92.E+10          | 3.90.E+10          | 4.06.E+10          | 3.82.E+10          | 4.32.E+10              | 4.37.E+10              | 4.53.E+10              | 4.28.E+10              |
| 14  | P13639    | Elongation factor 2 [OS=Homo sapiens]                                      | 979.4         | 77           | 61         | 9101   | 60                | 144100                  | 14619                           | 60                                           | 58                                       | 1                | 2.17.E+10          | 2.15.E+10          | 2.03.E+10          | 2.24.E+10          | 1.96.E+10              | 1.82.E+10              | 1.87.E+10              | 1.83.E+10              |
| 15  | Q00610-1  | Clathrin heavy chain 1 [OS=Homo sapiens]                                   | 933.0         | 60           | 74         | 3970   | 74                | 66736                   | 6197                            | 73                                           | 73                                       | 0                | 5.23.E+09          | 5.45.E+09          | 5.26.E+09          | 5.27.E+09          | 9.33.E+09              | 9.40.E+09              | 9.21.E+09              | 9.30.E+09              |
| 16  | P08238    | Heat shock protein HSP 90-beta [OS=Homo sapiens]                           | 888.5         | 73           | 61         | 7686   | 36                | 122279                  | 12255                           | 60                                           | 58                                       | 2                | 1.33.E+10          | 1.34.E+10          | 1.36.E+10          | 1.32.E+10          | 1.24.E+10              | 1.24.E+10              | 1.16.E+10              | 1.24.E+10              |
| 17  | P14618    | Pyruvate kinase PKM [OS=Homo sapiens]                                      | 838.7         | 78           | 40         | 7881   | 40                | 159852                  | 14026                           | 39                                           | 39                                       | 0                | 4.29.E+10          | 4.31.E+10          | 4.23.E+10          | 4.26.E+10          | 4.17.E+10              | 4.05.E+10              | 4.05.E+10              | 4.31.E+10              |
| 18  | P63261    | Actin, cytoplasmic 2 [OS=Homo sapiens]                                     | 800.5         | 90           | 34         | 13892  | 1                 | 288263                  | 21966                           | 32                                           | 33                                       | 0                | 5.09.E+08          | 5.65.E+08          | 4.45.E+08          | 5.62.E+08          | 6.18.E+08              | 6.06.E+08              | 5.39.E+08              | 6.25.E+08              |
| 19  | Q01082-1  | Spectrin beta chain, non-erythrocytic 1 [OS=Homo sapiens]                  | 783.5         | 44           | 72         | 2286   | 7                 | 27921                   | 3121                            | 72                                           | 69                                       | 60               | 2.54.E+09          | 2.53.E+09          | 2.54.E+09          | 2.55.E+09          | 3.14.E+09              | 3.03.E+09              | 2.95.E+09              | 3.14.E+09              |
| 20  | P21980    | Protein-glutamine gamma-glutamyltransferase 2 [OS=Homo sapiens]            | 773.3         | 71           | 47         | 7076   | 47                | 146906                  | 11700                           | 46                                           | 47                                       | 0                | 2.08.E+10          | 2.12.E+10          | 2.10.E+10          | 2.10.E+10          | 2.64.E+10              | 2.71.E+10              | 2.67.E+10              | 2.70.E+10              |
| 21  | P06733-1  | alpha-enolase [OS=Homo sapiens]                                            | 757.8         | 79           | 37         | 10199  | 33                | 222051                  | 16699                           | 37                                           | 37                                       | 4                | 4.49.E+10          | 4.58.E+10          | 4.43.E+10          | 4.56.E+10          | 4.81.E+10              | 4.86.E+10              | 4.63.E+10              | 4.81.E+10              |
| 22  | P46940    | Ras GTPase-activating-like protein IQGAP1 [OS=Homo sapiens]                | 737.0         | 59           | 75         | 2789   | 71                | 44940                   | 4322                            | 74                                           | 74                                       | 3                | 3.35.E+09          | 3.50.E+09          | 3.31.E+09          | 3.28.E+09          | 4.13.E+09              | 4.07.E+09              | 3.83.E+09              | 3.94.E+09              |
| 23  | P78527    | DNA-dependent protein kinase catalytic subunit [OS=Homo sapiens]           | 725.2         | 31           | 91         | 2625   | 91                | 33537                   | 2976                            | 90                                           | 89                                       | 0                | 3.22.E+09          | 3.11.E+09          | 3.22.E+09          | 3.04.E+09          | 3.58.E+09              | 3.60.E+09              | 3.65.E+09              | 3.56.E+09              |
| 24  | P07355    | Annexin A2 [OS=Homo sapiens]                                               | 724.2         | 85           | 46         | 10272  | 46                | 192605                  | 16560                           | 45                                           | 44                                       | 0                | 6.13.E+10          | 6.54.E+10          | 6.38.E+10          | 6.53.E+10          | 5.89.E+10              | 5.82.E+10              | 5.79.E+10              | 5.80.E+10              |
| 25  | P07437    | tubulin beta chain [OS=Homo sapiens]                                       | 719.8         | 82           | 30         | 8476   | 6                 | 153867                  | 14254                           | 30                                           | 30                                       | 2                | 5.16.E+09          | 5.52.E+09          | 5.17.E+09          | 5.23.E+09          | 7.02.E+09              | 6.88.E+09              | 5.71.E+09              | 6.76.E+09              |
| 26  | P68371    | Tubulin beta-4B chain [OS=Homo sapiens]                                    | 703.7         | 82           | 31         | 7878   | 1                 | 140525                  | 13114                           | 31                                           | 31                                       | 41               | 2.65.E+10          | 2.77.E+10          | 2.63.E+10          | 2.74.E+10          | 3.11.E+10              | 3.12.E+10              | 3.01.E+10              | 3.01.E+10              |
| 27  | P11142-1  | Heat shock cognate 71 kDa protein [OS=Homo sapiens]                        | 698.2         | 70           | 45         | 5152   | 41                | 88940                   | 7681                            | 44                                           | 45                                       | 4                | 1.91.E+10          | 1.91.E+10          | 1.93.E+10          | 1.84.E+10          | 1.85.E+10              | 1.98.E+10              | 2.01.E+10              | 1.96.E+10              |
| 28  | P29401    | Transketolase [OS=Homo sapiens]                                            | 686.0         | 81           | 39         | 5153   | 39                | 92099                   | 8295                            | 39                                           | 39                                       | 0                | 1.22.E+10          | 1.26.E+10          | 1.22.E+10          | 1.25.E+10          | 1.24.E+10              | 1.30.E+10              | 1.29.E+10              | 1.28.E+10              |
| 29  | P12814-1  | Alpha-actinin-1 [OS=Homo sapiens]                                          | 682.4         | 70           | 53         | 4719   | 31                | 71435                   | 6751                            | 53                                           | 52                                       | 0                | 2.71.E+09          | 2.82.E+09          | 2.82.E+09          | 2.65.E+09          | 4.63.E+09              | 4.87.E+09              | 4.77.E+09              | 4.61.E+09              |
| 30  | O75369-1  | Filamin-B [OS=Homo sapiens]                                                | 676.8         | 44           | 77         | 2387   | 70                | 27281                   | 2935                            | 76                                           | 77                                       | 0                | 2.53.E+09          | 2.58.E+09          | 2.70.E+09          | 2.23.E+09          | 2.75.E+09              | 2.80.E+09              | 2.97.E+09              | 2.94.E+09              |
| 31  | P42704    | Leucine-rich PPR motif-containing protein, mitochondrial [OS=Homo sapiens] | 664.7         | 57           | 58         | 3078   | 58                | 42255                   | 3947                            | 58                                           | 58                                       | 0                | 3.47.E+09          | 3.57.E+09          | 3.54.E+09          | 3.73.E+09          | 4.33.E+09              | 4.32.E+09              | 3.96.E+09              | 4.24.E+09              |
| 32  | P22314    | Ubiquitin-like modifier-activating enzyme 1 [OS=Homo sapiens]              | 652.3         | 69           | 48         | 3848   | 48                | 68422                   | 6117                            | 47                                           | 48                                       | 0                | 6.02.E+09          | 6.03.E+09          | 5.94.E+09          | 5.95.E+09          | 7.32.E+09              | 7.35.E+09              | 7.22.E+09              | 7.25.E+09              |
| 33  | Q9NZM1    | Myoferlin [OS=Homo sapiens]                                                | 635.4         | 45           | 69         | 2289   | 69                | 23093                   | 2893                            | 69                                           | 69                                       | 0                | 4.53.E+09          | 4.37.E+09          | 4.47.E+09          | 4.52.E+09          | 2.56.E+09              | 2.59.E+09              | 2.46.E+09              | 2.64.E+09              |
| 34  | P04406-1  | glyceraldehyde-3-phosphate dehydrogenase [OS=Homo sapiens]                 | 620.7         | 85           | 27         | 8652   | 27                | 157026                  | 16002                           | 27                                           | 27                                       | 0                | 4.87.E+10          | 5.04.E+10          | 4.87.E+10          | 4.68.E+10          | 4.41.E+10              | 4.34.E+10              | 4.35.E+10              | 4.41.E+10              |
| 35  | P10809    | 60 kDa heat shock protein, mitochondrial [OS=Homo sapiens]                 | 611.1         | 74           | 38         | 4411   | 38                | 86617                   | 7133                            | 38                                           | 37                                       | 0                | 1.03.E+10          | 1.05.E+10          | 1.01.E+10          | 1.05.E+10          | 1.14.E+10              | 1.14.E+10              | 1.13.E+10              | 1.17.E+10              |
| 36  | Q9BQE3    | Tubulin alpha-1C chain [OS=Homo sapiens]                                   | 606.0         | 77           | 32         | 5918   | 2                 | 118909                  | 9877                            | 32                                           | 32                                       | 34               | 2.08.E+10          | 2.16.E+10          | 2.07.E+10          | 1.99.E+10          | 3.11.E+10              | 3.17.E+10              | 3.03.E+10              | 3.11.E+10              |
| 37  | P68104    | Elongation factor 1-alpha 1 [OS=Homo sapiens]                              | 587.2         | 70           | 26         | 7346   | 15                | 98018                   | 12491                           | 26                                           | 25                                       | 14               | 3.68.E+10          | 3.58.E+10          | 3.72.E+10          | 3.72.E+10          | 5.63.E+10              | 5.59.E+10              | 3.75.E+10              | 3.64.E+10              |
| 38  | Q14697-1  | Neutral alpha-glucosidase AB [OS=Homo sapiens]                             | 585.2         | 62           | 42         | 2877   | 42                | 33502                   | 3908                            | 42                                           | 42                                       | 0                | 5.28.E+09          | 5.15.E+09          | 5.05.E+09          | 4.94.E+09          | 3.82.E+09              | 3.91.E+09              | 5.85.E+09              | 5.86.E+09              |
| 39  | Q71U36    | tubulin alpha-1A chain [OS=Homo sapiens]                                   | 581.7         | 76           | 31         | 5135   | 1                 | 100856                  | 9066                            | 31                                           | 31                                       | 3                | 9.02.E+08          | 8.94.E+08          | 8.17.E+08          | 8.22.E+08          | 1.14.E+09              | 1.16.E+09              | 1.03.E+09              | 1.09.E+09              |
| 40  | P04350    | Tubulin beta-4A chain [OS=Homo sapiens]                                    | 576.5         | 71           | 26         | 6559   | 4                 | 114288                  | 10871                           | 26                                           | 25                                       | 0                | 6.88.E+07          | 1.79.E+08          | 1.15.E+08          | 7.79.E+07          | 2.36.E+08              | 2.42.E+08              | 2.36.E+08              | 2.38.E+08              |
| 41  | P02545    | Prelamin-A/C [OS=Homo sapiens]                                             | 567.0         | 66           | 45         | 3894   | 5                 | 68422                   | 5838                            | 45                                           | 45                                       | 47               | 1.30.E+10          | 1.25.E+10          | 1.31.E+10          | 1.34.E+10          | 9.36.E+09              | 9.44.E+09              | 9.93.E+09              | 9.42.E+09              |
| 42  | P13010    | X-ray repair cross-complementing protein 5 [OS=Homo sapiens]               | 566.5         | 73           | 44         | 3203   | 43                | 40967                   | 4602                            | 44                                           | 42                                       | 1                | 6.09.E+09          | 6.09.E+09          | 6.00.E+09          | 5.89.E+09          | 6.60.E+09              | 6.51.E+09              | 6.75.E+09              | 6.55.E+09              |
| 43  | Q01082-3  | Isoform 2 of Spectrin beta chain, non-erythrocytic 1 [OS=Homo sapiens]     | 561.0         | 46           | 66         | 1050   | 1                 |                         | 2750                            | 66                                           |                                          | 0                |                    |                    |                    |                    |                        |                        |                        | 3.82.E+06              |
| 44  | Q9BVA1    | Tubulin beta-2B chain [OS=Homo sapiens]                                    | 542.3         | 66           | 27         | 6658   | 3                 | 116888                  | 10889                           | 27                                           | 27                                       | 0                | 4.58.E+07          | 4.43.E+07          | 4.01.E+07          | 4.80.E+07          | 8.16.E+07              | 7.66.E+07              | 8.20.E+07              | 9.10.E+07              |
| 45  | P30101    | Protein disulfide-isomerase A3 [OS=Homo sapiens]                           | 529.2         | 67           | 36         | 3231   | 36                | 46485                   | 5043                            | 36                                           | 36                                       | 0                | 7.61.E+09          | 7.54.E+09          | 7.18.E+09          | 7.83.E+09          | 9.56.E+09              | 1.00.E+10              | 9.61.E+09              | 9.91.E+09              |
| 46  | P68366    | Tubulin alpha-4A chain [OS=Homo sapiens]                                   | 526.8         | 66           | 26         | 5182   | 8                 | 97467                   | 8480                            | 26                                           | 26                                       | 0                | 2.08.E+09          | 2.18.E+09          | 2.09.E+09          | 2.06.E+09          | 2.95.E+09              | 3.16.E+09              | 1.84.E+09              | 2.97.E+09              |
| 47  | P11021    | 78 kDa glucose-regulated protein [OS=Homo sapiens]                         | 498.9         | 53           | 33         | 3485   | 31                | 58674                   | 5541                            | 33                                           | 33                                       | 0                | 7.10.E+09          | 7.35.E+09          | 7.47.E+09          | 7.05.E+09          | 7.79.E+09              | 7.41.E+09              | 7.45.E+09              | 7.53.E+09              |
| 48  | P04075    | fructose-bisphosphate aldolase A [OS=Homo sapiens]                         | 490.0         | 89           | 32         | 3181   | 30                | 48453                   | 5086                            | 30                                           | 32                                       | 2                | 8.84.E+09          | 8.71.E+09          | 8.43.E+09          | 9.25.E+09          | 9.56.E+09              | 1.00.E+10              | 9.88.E+09              | 1.03.E+10              |
| 49  | P07237    | Protein disulfide-isomerase [OS=Homo sapiens]                              | 489.9         | 75           | 37         | 4950   | 37                | 75694                   | 6857                            | 37                                           | 37                                       | 0                | 1.29.E+10          | 1.25.E+10          | 1.31.E+10          | 1.28.E+10          | 1.19.E+10              | 1.21.E+10              | 1.14.E+10              | 1.22.E+10              |
| 50  | P14625    | Endoplasmic reticulum chaperone protein [OS=Homo sapiens]                  | 488.2         | 58           | 46         | 2806   | 44                | 39336                   | 3789                            | 46                                           | 45                                       | 0                | 4.46.E+09          | 4.37.E+09          | 4.27.E+09          | 4.40.E+09          | 6.22.E+09              | 6.27.E+09              | 6.44.E+09              | 6.29.E+09              |
| 51  | O60701    | UDP-glucose 6-dehydrogenase [OS=Homo sapiens]                              | 487.6         | 80           | 35         | 2659   | 35                | 50680                   | 4167                            | 35                                           | 35                                       | 0                | 5.51.E+09          | 5.52.E+09          | 5.58.E+09          | 5.60.E+09          | 5.94.E+09              | 5.94.E+09              | 5.75.E+09              | 5.91.E+09              |
| 52  | P07814    | Bifunctional glutamate/proline--tRNA ligase [OS=Homo sapiens]              | 483.3         | 54           | 57         | 1840   | 57                | 23813                   | 2397                            | 56                                           | 55                                       | 0                | 1.71.E+09          | 1.83.E+09          | 1.70.E+09          | 1.87.E+09          | 1.79.E+09              | 1.86.E+09              | 1.60.E+09              | 1.70.E+09              |
| 53  | P27708    | CAD protein [OS=Homo sapiens]                                              | 482.1         | 43           | 55         | 1773   | 55                | 18663                   | 2195                            | 54                                           | 54                                       | 0                | 2.24.E+09          | 2.18.E+09          | 2.14.E+09          | 2.37.E+09          | 2.75.E+09              | 2.74.E+09              | 2.39.E+09              | 2.74.E+09              |
| 54  | P00338-1  | L-lactate dehydrogenase A chain [OS=Homo sapiens]                          | 481.5         | 86           | 30         | 4104   | 29                | 71432                   | 5636                            | 28                                           | 29                                       | 1                | 1.78.E+10          | 1.                 |                    |                    |                        |                        |                        |                        |

| No. | Accession | Description                                                           | Sum PEP Score | Coverage [%] | # Peptides | # PSMs | # Unique Peptides | Score Mascot: A5 Mascot | Score Sequest HT: A2 Sequest HT | # Peptides (by Search Engine): A2 Sequest HT | # Peptides (by Search Engine): A5 Mascot | # Razor Peptides | ctrl Abundance_s_1 | ctrl Abundance_s_2 | ctrl Abundance_s_3 | ctrl Abundance_s_4 | JAM-A KO Abundance_s_1 | JAM-A KO Abundance_s_2 | JAM-A KO Abundance_s_3 | JAM-A KO Abundance_s_4 |
|-----|-----------|-----------------------------------------------------------------------|---------------|--------------|------------|--------|-------------------|-------------------------|---------------------------------|----------------------------------------------|------------------------------------------|------------------|--------------------|--------------------|--------------------|--------------------|------------------------|------------------------|------------------------|------------------------|
| 57  | P06576    | ATP synthase subunit beta, mitochondrial [OS=Homo sapiens]            | 461.4         | 71           | 25         | 2852   | 25                | 53974                   | 4833                            | 25                                           | 25                                       | 0                | 6.76.E+09          | 6.82.E+09          | 6.34.E+09          | 6.55.E+09          | 6.83.E+09              | 6.90.E+09              | 6.53.E+09              | 6.74.E+09              |
| 58  | P15311    | Ezrin [OS=Homo sapiens]                                               | 461.0         | 62           | 45         | 4342   | 32                | 48130                   | 5252                            | 45                                           | 45                                       | 15               | 1.05.E+10          | 1.05.E+10          | 1.07.E+10          | 1.03.E+10          | 8.27.E+09              | 8.52.E+09              | 8.70.E+09              | 8.31.E+09              |
| 59  | P04083    | annexin A1 [OS=Homo sapiens]                                          | 458.7         | 77           | 29         | 3530   | 29                | 66338                   | 5452                            | 28                                           | 29                                       | 0                | 9.71.E+09          | 9.82.E+09          | 9.78.E+09          | 9.98.E+09          | 8.45.E+09              | 8.38.E+09              | 8.40.E+09              | 8.58.E+09              |
| 60  | Q13509    | tubulin beta-3 chain [OS=Homo sapiens]                                | 454.7         | 69           | 24         | 4033   | 7                 | 22252                   | 6442                            | 24                                           | 24                                       | 2                | 1.01.E+09          | 1.07.E+09          | 9.98.E+08          | 9.69.E+08          | 8.88.E+08              | 8.37.E+08              | 8.81.E+08              | 8.18.E+08              |
| 61  | P12956    | X-ray repair cross-complementing protein 6 [OS=Homo sapiens]          | 433.7         | 55           | 37         | 2850   | 37                | 35068                   | 3690                            | 37                                           | 37                                       | 0                | 4.52.E+09          | 4.62.E+09          | 4.49.E+09          | 4.33.E+09          | 4.95.E+09              | 4.96.E+09              | 5.07.E+09              | 5.19.E+09              |
| 62  | P43490    | nicotinamide phosphoribosyltransferase [OS=Homo sapiens]              | 431.5         | 77           | 33         | 1988   | 33                | 28309                   | 2796                            | 33                                           | 33                                       | 0                | 2.02.E+09          | 2.05.E+09          | 2.01.E+09          | 1.94.E+09          | 1.59.E+09              | 1.62.E+09              | 1.60.E+09              | 1.52.E+09              |
| 63  | P31939    | bifunctional purine biosynthesis protein purH [OS=Homo sapiens]       | 429.1         | 77           | 36         | 2069   | 36                | 29862                   | 3052                            | 33                                           | 36                                       | 0                | 3.48.E+09          | 3.42.E+09          | 3.38.E+09          | 3.27.E+09          | 3.98.E+09              | 4.04.E+09              | 4.15.E+09              | 4.20.E+09              |
| 64  | Q08211    | Atp-dependent rna helicase a [OS=Homo sapiens]                        | 424.9         | 41           | 38         | 1748   | 38                | 23643                   | 2483                            | 38                                           | 38                                       | 0                | 2.87.E+09          | 2.91.E+09          | 2.91.E+09          | 2.87.E+09          | 3.14.E+09              | 3.17.E+09              | 3.20.E+09              | 3.14.E+09              |
| 65  | P52895    | Aldo-keto reductase family 1 member C2 [OS=Homo sapiens]              | 421.6         | 81           | 24         | 3031   | 5                 | 31324                   | 4554                            | 24                                           | 23                                       | 0                | 1.25.E+09          | 1.09.E+09          | 1.19.E+09          | 1.19.E+09          | 3.97.E+09              | 4.09.E+09              | 4.43.E+09              | 4.19.E+09              |
| 66  | P61978    | Heterogeneous nuclear ribonucleoprotein K [OS=Homo sapiens]           | 409.7         | 56           | 27         | 3019   | 2                 | 48369                   | 4386                            | 27                                           | 26                                       | 25               | 6.18.E+09          | 6.18.E+09          | 6.31.E+09          | 6.46.E+09          | 7.23.E+09              | 7.17.E+09              | 7.33.E+09              | 7.20.E+09              |
| 67  | Q05639    | Elongation factor 1-alpha 2 [OS=Homo sapiens]                         | 401.6         | 66           | 21         | 5124   | 10                | 71382                   | 8254                            | 21                                           | 21                                       | 0                | 7.28.E+08          | 8.14.E+08          | 6.00.E+08          | 8.51.E+08          | 1.46.E+09              | 1.38.E+09              | 1.21.E+09              | 1.32.E+09              |
| 68  | P07195    | L-lactate dehydrogenase B chain [OS=Homo sapiens]                     | 399.8         | 71           | 24         | 3071   | 23                | 52632                   | 3739                            | 24                                           | 24                                       | 0                | 7.10.E+09          | 6.95.E+09          | 7.05.E+09          | 6.99.E+09          | 8.43.E+09              | 8.56.E+09              | 8.99.E+09              | 8.67.E+09              |
| 69  | P22626    | heterogeneous nuclear ribonucleoproteins A2/B1 [OS=Homo sapiens]      | 399.1         | 63           | 25         | 2870   | 21                | 42483                   | 4095                            | 25                                           | 25                                       | 4                | 8.18.E+09          | 8.04.E+09          | 7.91.E+09          | 8.65.E+09          | 9.50.E+09              | 8.92.E+09              | 8.92.E+09              | 9.02.E+09              |
| 70  | P78371-1  | T-complex protein 1 subunit beta [OS=Homo sapiens]                    | 399.0         | 73           | 30         | 1571   | 30                | 27507                   | 2262                            | 29                                           | 30                                       | 0                | 3.96.E+09          | 3.95.E+09          | 3.82.E+09          | 3.81.E+09          | 3.93.E+09              | 3.81.E+09              | 3.81.E+09              | 3.93.E+09              |
| 71  | P02545-2  | Isoform C of Prelamin-A/C [OS=Homo sapiens]                           | 398.2         | 65           | 41         | 1803   | 1                 | 27521                   | 5331                            | 41                                           | 41                                       | 0                | 2.18.E+08          | 2.30.E+08          | 1.89.E+08          | 2.21.E+08          | 2.12.E+08              | 2.03.E+08              | 2.01.E+08              | 1.94.E+08              |
| 72  | P22234    | multifunctional protein ADE2 [OS=Homo sapiens]                        | 395.9         | 77           | 35         | 1797   | 35                | 27254                   | 2584                            | 33                                           | 34                                       | 0                | 3.42.E+09          | 3.52.E+09          | 3.14.E+09          | 3.27.E+09          | 3.94.E+09              | 3.92.E+09              | 3.85.E+09              | 3.84.E+09              |
| 73  | P15924-1  | Desmoplakin [OS=Homo sapiens]                                         | 395.3         | 26           | 47         | 1279   | 47                | 15918                   | 1714                            | 47                                           | 46                                       | 0                | 1.41.E+09          | 1.41.E+09          | 1.41.E+09          | 1.42.E+09          | 1.21.E+09              | 1.19.E+09              | 1.11.E+09              | 1.13.E+09              |
| 74  | P0DMV8    | heat shock 70 kDa protein 1A [OS=Homo sapiens]                        | 393.8         | 54           | 26         | 1900   | 23                | 30208                   | 2994                            | 26                                           | 26                                       | 0                | 3.42.E+09          | 3.56.E+09          | 3.57.E+09          | 3.45.E+09          | 2.90.E+09              | 2.82.E+09              | 2.90.E+09              | 2.94.E+09              |
| 75  | P09651-1  | Heterogeneous nuclear ribonucleoprotein A1 [OS=Homo sapiens]          | 392.9         | 51           | 24         | 3091   | 20                | 49499                   | 4437                            | 24                                           | 24                                       | 0                | 4.68.E+09          | 4.72.E+09          | 4.50.E+09          | 4.67.E+09          | 4.22.E+09              | 4.45.E+09              | 4.33.E+09              | 4.43.E+09              |
| 76  | Q14974    | Importin subunit beta-1 [OS=Homo sapiens]                             | 382.3         | 54           | 32         | 1817   | 32                | 27892                   | 2370                            | 32                                           | 32                                       | 0                | 1.58.E+09          | 1.64.E+09          | 1.50.E+09          | 1.66.E+09          | 2.36.E+09              | 2.25.E+09              | 2.16.E+09              | 2.27.E+09              |
| 77  | P19338    | Nucleolin [OS=Homo sapiens]                                           | 376.0         | 37           | 30         | 2815   | 30                | 56653                   | 4084                            | 30                                           | 30                                       | 0                | 7.45.E+09          | 7.52.E+09          | 7.22.E+09          | 7.35.E+09          | 7.04.E+09              | 7.46.E+09              | 7.40.E+09              | 7.45.E+09              |
| 78  | P23528    | Cofilin-1 [OS=Homo sapiens]                                           | 375.2         | 78           | 18         | 3220   | 12                | 66841                   | 5401                            | 17                                           | 17                                       | 6                | 1.50.E+10          | 1.48.E+10          | 1.46.E+10          | 1.47.E+10          | 1.80.E+10              | 1.88.E+10              | 1.78.E+10              | 1.80.E+10              |
| 79  | Q04828    | aldo-keto reductase family 1 member C1 [OS=Homo sapiens]              | 373.7         | 81           | 26         | 2358   | 2                 | 23703                   | 3612                            | 26                                           | 25                                       | 27               | 2.95.E+09          | 2.93.E+09          | 2.92.E+09          | 3.06.E+09          | 9.31.E+09              | 9.31.E+09              | 1.00.E+10              | 9.21.E+09              |
| 80  | Q16881-1  | Thioredoxin reductase 1, cytoplasmic [OS=Homo sapiens]                | 366.6         | 54           | 22         | 1256   | 22                | 19005                   | 2086                            | 22                                           | 22                                       | 0                | 1.82.E+09          | 1.86.E+09          | 2.03.E+09          | 1.89.E+09          | 2.14.E+09              | 2.42.E+09              | 2.08.E+09              | 2.07.E+09              |
| 81  | P13797    | Plastin-3 [OS=Homo sapiens]                                           | 365.8         | 55           | 31         | 1566   | 27                | 19458                   | 2336                            | 31                                           | 31                                       | 4                | 2.25.E+09          | 2.29.E+09          | 2.27.E+09          | 2.20.E+09          | 3.06.E+09              | 3.19.E+09              | 3.14.E+09              | 2.96.E+09              |
| 82  | Q00839    | Heterogeneous nuclear ribonucleoprotein U [OS=Homo sapiens]           | 362.1         | 46           | 30         | 2519   | 30                | 36410                   | 3635                            | 30                                           | 30                                       | 0                | 5.90.E+09          | 6.17.E+09          | 5.81.E+09          | 6.07.E+09          | 6.28.E+09              | 6.22.E+09              | 6.29.E+09              | 6.19.E+09              |
| 83  | P67936    | Tropomyosin alpha-4 chain [OS=Homo sapiens]                           | 361.8         | 74           | 27         | 1827   | 19                | 24735                   | 2662                            | 26                                           | 27                                       | 8                | 2.59.E+09          | 2.63.E+09          | 2.65.E+09          | 2.55.E+09          | 3.84.E+09              | 3.76.E+09              | 3.99.E+09              | 3.80.E+09              |
| 84  | P60842    | Eukaryotic initiation factor 4A-1 [OS=Homo sapiens]                   | 359.4         | 77           | 28         | 2326   | 16                | 40832                   | 3227                            | 28                                           | 28                                       | 12               | 6.33.E+09          | 6.06.E+09          | 6.11.E+09          | 6.11.E+09          | 4.60.E+09              | 4.72.E+09              | 5.06.E+09              | 4.69.E+09              |
| 85  | P06744    | glucose-6-phosphate isomerase [OS=Homo sapiens]                       | 357.7         | 62           | 29         | 2477   | 29                | 36923                   | 3530                            | 28                                           | 27                                       | 0                | 4.76.E+09          | 4.75.E+09          | 4.74.E+09          | 4.90.E+09          | 4.10.E+09              | 4.22.E+09              | 4.27.E+09              | 4.07.E+09              |
| 86  | O75643-1  | U5 small nuclear ribonucleoprotein 200 kDa helicase [OS=Homo sapiens] | 351.6         | 27           | 35         | 1044   | 35                | 15500                   | 1373                            | 35                                           | 35                                       | 0                | 8.20.E+08          | 8.73.E+08          | 8.10.E+08          | 9.30.E+08          | 8.57.E+08              | 8.11.E+08              | 7.42.E+08              | 7.96.E+08              |
| 87  | P11586    | C-1-tetrahydrofolate synthase, cytoplasmic [OS=Homo sapiens]          | 351.2         | 55           | 37         | 1828   | 37                | 25773                   | 2586                            | 37                                           | 37                                       | 0                | 3.56.E+09          | 3.53.E+09          | 3.52.E+09          | 3.39.E+09          | 4.43.E+09              | 4.37.E+09              | 4.29.E+09              | 4.34.E+09              |
| 88  | P55060-1  | Exportin-2 [OS=Homo sapiens]                                          | 338.5         | 46           | 32         | 1651   | 32                | 23424                   | 2051                            | 32                                           | 32                                       | 0                | 1.36.E+09          | 1.33.E+09          | 1.32.E+09          | 1.28.E+09          | 1.63.E+09              | 1.58.E+09              | 1.63.E+09              | 1.55.E+09              |
| 89  | P25705-1  | ATP synthase subunit alpha, mitochondrial [OS=Homo sapiens]           | 334.6         | 63           | 29         | 2555   | 29                | 51755                   | 4084                            | 29                                           | 28                                       | 0                | 6.97.E+09          | 6.80.E+09          | 6.99.E+09          | 6.80.E+09          | 7.75.E+09              | 7.64.E+09              | 7.76.E+09              | 7.77.E+09              |
| 90  | P48643    | T-complex protein 1 subunit epsilon [OS=Homo sapiens]                 | 334.4         | 68           | 26         | 1311   | 25                | 20492                   | 1774                            | 24                                           | 26                                       | 1                | 2.87.E+09          | 2.95.E+09          | 3.46.E+09          | 3.28.E+09          | 2.78.E+09              | 3.09.E+09              | 3.20.E+09              | 3.25.E+09              |
| 91  | Q01813    | ATP-dependent 6-phosphofructokinase, platelet type [OS=Homo sapiens]  | 332.5         | 52           | 31         | 1469   | 29                | 20218                   | 1828                            | 31                                           | 31                                       | 2                | 2.59.E+09          | 2.54.E+09          | 2.53.E+09          | 2.58.E+09          | 2.52.E+09              | 2.54.E+09              | 2.54.E+09              | 2.57.E+09              |
| 92  | P18669    | Phosphoglycerate mutase 1 [OS=Homo sapiens]                           | 331.1         | 70           | 17         | 1800   | 17                | 26495                   | 3078                            | 17                                           | 17                                       | 0                | 3.57.E+09          | 3.76.E+09          | 3.60.E+09          | 3.78.E+09          | 4.33.E+09              | 4.25.E+09              | 4.40.E+09              | 4.23.E+09              |
| 93  | P36578    | 60S ribosomal protein L4 [OS=Homo sapiens]                            | 329.4         | 51           | 26         | 1578   | 26                | 19768                   | 2590                            | 24                                           | 26                                       | 0                | 4.50.E+09          | 4.49.E+09          | 4.45.E+09          | 4.20.E+09          | 3.81.E+09              | 3.92.E+09              | 3.91.E+09              | 3.90.E+09              |
| 94  | P27797    | Calreticulin [OS=Homo sapiens]                                        | 327.1         | 62           | 18         | 1705   | 18                | 24169                   | 2480                            | 18                                           | 18                                       | 0                | 3.02.E+09          | 2.97.E+09          | 3.01.E+09          | 3.20.E+09          | 4.06.E+09              | 4.06.E+09              | 3.98.E+09              | 4.09.E+09              |
| 95  | P31947-1  | 14-3-3 protein sigma [OS=Homo sapiens]                                | 326.4         | 82           | 19         | 3344   | 15                | 52984                   | 4644                            | 19                                           | 19                                       | 0                | 6.21.E+09          | 6.20.E+09          | 6.12.E+09          | 6.43.E+09          | 3.90.E+09              | 3.65.E+09              | 3.71.E+09              | 3.71.E+09              |
| 96  | P35580    | Myosin-10 [OS=Homo sapiens]                                           | 326.2         | 21           | 31         | 1083   | 17                | 14581                   | 1428                            | 31                                           | 30                                       | 0                | 5.02.E+08          | 5.19.E+08          | 5.13.E+08          | 4.85.E+08          | 4.97.E+08              | 4.85.E+08              | 4.62.E+08              | 4.41.E+08              |
| 97  | P06748    | Nucleophosmin [OS=Homo sapiens]                                       | 325.8         | 63           | 14         | 1692   | 13                | 44680                   | 3346                            | 14                                           | 14                                       | 1                | 3.77.E+09          | 3.99.E+09          | 3.93.E+09          | 4.46.E+09          | 3.87.E+09              | 3.87.E+09              | 3.89.E+09              | 3.99.E+09              |
| 98  | P00558    | phosphoglycerate kinase 1 [OS=Homo sapiens]                           | 325.5         | 73           | 22         | 1650   | 22                | 29423                   | 2778                            | 22                                           | 22                                       | 0                | 3.59.E+09          | 3.58.E+09          | 3.58.E+09          | 3.63.E+09          | 4.46.E+09              | 4.52.E+09              | 3.92.E+09              | 4.40.E+09              |
| 99  | O00151    | PDZ and LIM domain protein 1 [OS=Homo sapiens]                        | 324.6         | 84           | 20         | 1329   | 20                | 18559                   | 2166                            | 19                                           | 20                                       | 0                | 1.60.E+09          | 1.60.E+09          | 1.60.E+09          | 1.50.E+09          | 2.29.E+09              | 2.34.E+09              | 2.38.E+09              | 2.24.E+09              |
| 100 | P38646    | Stress-70 protein, mitochondrial [OS=Homo sapiens]                    | 323.7         | 54           | 28         | 1625   | 28                | 30151                   | 2299                            | 28                                           | 28                                       | 0                | 3.31.E+09          | 3.42.E+09          | 3.27.E+09          | 3.28.E+09          | 3.51.E+09              | 3.71.E+09              | 3.40.E+09              | 3.51.E+09              |
| 101 | Q99832    | T-complex protein 1 subunit eta [OS=Homo sapiens]                     | 310.6         | 68           | 27         | 1630   | 27                | 35617                   | 2557                            | 27                                           | 27                                       | 0                | 2.74.E+09          | 2.79.E+09          | 2.71.E+09          | 2.70.E+09          | 2.78.E+09              | 2.79.E+09              | 2.81.E+09              | 2.74.E+09              |
| 102 | P26038    | Moesin [OS=Homo sapiens]                                              | 308.8         | 51           | 30         | 2302   | 18                | 22784                   | 2427                            | 30                                           | 30                                       | 1                | 9.63.E+08          | 9.86.E+08          | 8.86.E+08          | 9.36.E+08          | 9.70.E+08              | 8.83.E+08              | 9.06.E+08              | 8.68.E+08              |
| 103 | P26641    | elongation factor 1-gamma [OS=Homo sapiens]                           | 306.7         | 69           | 24         | 2567   | 24                | 36985                   | 3535                            | 23                                           | 23                                       | 0                | 8.99.E+09          | 8.63.E+09          | 8.96.E+09          | 9.01.E+09          | 7.77.E+09              | 7.77.E+09              | 7.96.E+09              | 7.27.E+09              |
| 104 | P09936    | Ubiquitin carboxyl-terminal hydrolase isozyme L1 [OS=Homo sapiens]    | 305.5         | 78           | 16         | 1581   | 16                | 23243                   | 2666                            | 16                                           | 16                                       | 0                | 4.08.E+09          | 3.85.E+09          | 3.98.E+09          | 4.16.E+09          | 5.79.E+09              | 5.34.E+09              | 5.68.E+09              | 5.38.E+09              |
| 105 | P60174    | Triosephosphate isomerase [OS=Homo sapiens]                           | 303.0         | 72           | 17         | 2480   | 17                | 44927                   | 4485                            | 17                                           | 17                                       | 0                | 7.75.E+09          | 7.87.E+09          | 7.78.E+09          | 8.03.E+09          | 8.30.E+09              | 8.29.E+09              | 7.53.E+09              | 8.31.E+09              |
| 106 | P41250    | Glycine--tRNA ligase [OS=Homo sapiens]                                | 302.9         | 45           | 24         | 1167   | 24                | 19982                   | 1672                            | 24                                           | 24                                       | 0                | 1.31.E+09          | 1.29.E+09          | 1.26.E+09          | 1.35.E+09          | 1.37.E+09              | 1.40.E+09              | 1.37.E+09              | 1.42.E+09              |
| 107 | P08195    | 4F2 cell-surface antigen heavy chain [OS=Homo sapiens]                | 302.3         | 40           | 22         | 1895   | 22                | 26308                   | 2948                            | 22                                           | 22                                       | 0                | 4.95.E+09          | 5.12.E+09          | 4.90.E+09          | 4.82.E+09          | 7.39.E+09              | 7.48.E+09              | 7.48.E+09              | 7.48.E+09              |
| 108 | Q04637    | eukaryotic translation initiation factor 4 gamma 1 [OS=Homo sapiens]  | 302.3         | 29           | 35         | 1390   | 35                | 17736                   | 1599                            | 35                                           | 35                                       | 0                | 1.63.E+09          | 1.69.E+09          | 1.68.E+09          | 1.83.E+09          | 1.70.E+09              | 1.66.E+09              | 1.61.E+09              | 1.74.E+09              |
| 109 | P50991    | T-complex protein 1 subunit delta [OS=Homo sapiens]                   | 298.5         | 58           | 23         | 1289   | 22                | 18290                   | 1835                            | 23                                           | 23                                       | 0                | 2.13.E+09          | 2.17.E+09          | 2.11.E+09          | 2.15.E+09          | 2.38.E+09              | 2.27.E+09              | 2.09.E+09              | 2.25.E+09              |
| 110 | P26640    | Valine--tRNA ligase [OS=Homo sapiens]                                 | 297.8         | 37           | 27         | 1138   | 27                | 14701                   | 1358                            | 26                                           |                                          |                  |                    |                    |                    |                    |                        |                        |                        |                        |

| No. | Accession | Description                                                                                         | Sum PEP Score | Coverage [%] | # Peptides | # PSMs | # Unique Peptides | Score Mascot: A5 Mascot | Score Sequest HT: A2 Sequest HT | # Peptides (by Search Engine): A2 Sequest HT | # Peptides (by Search Engine): A5 Mascot | # Razor Peptides | ctrl Abundance s_1 | ctrl Abundance s_2 | ctrl Abundance s_3 | ctrl Abundance s_4 | JAM-A KO Abundance s_1 | JAM-A KO Abundance s_2 | JAM-A KO Abundance s_3 | JAM-A KO Abundance s_4 |
|-----|-----------|-----------------------------------------------------------------------------------------------------|---------------|--------------|------------|--------|-------------------|-------------------------|---------------------------------|----------------------------------------------|------------------------------------------|------------------|--------------------|--------------------|--------------------|--------------------|------------------------|------------------------|------------------------|------------------------|
| 112 | Q9UQ80    | proliferation-associated protein 2G4 [OS=Homo sapiens]                                              | 294.5         | 67           | 24         | 1513   | 24                | 16855                   | 2415                            | 23                                           | 24                                       | 0                | 2.93E+09           | 2.96E+09           | 2.96E+09           | 2.82E+09           | 2.48E+09               | 2.44E+09               | 2.52E+09               | 2.46E+09               |
| 113 | P26599    | Polypyrimidine tract-binding protein 1 [OS=Homo sapiens]                                            | 293.1         | 60           | 20         | 1600   | 18                | 31061                   | 2571                            | 19                                           | 20                                       | 2                | 2.26E+09           | 2.22E+09           | 2.13E+09           | 2.17E+09           | 2.43E+09               | 2.46E+09               | 2.18E+09               | 2.31E+09               |
| 114 | P52209    | 6-phosphogluconate dehydrogenase, decarboxylating [OS=Homo sapiens]                                 | 292.9         | 67           | 25         | 1423   | 25                | 19707                   | 2022                            | 24                                           | 25                                       | 0                | 2.19E+09           | 2.19E+09           | 2.11E+09           | 2.17E+09           | 1.81E+09               | 1.82E+09               | 1.72E+09               | 1.73E+09               |
| 115 | P50395-1  | Rab GDP dissociation inhibitor beta [OS=Homo sapiens]                                               | 291.9         | 64           | 23         | 1277   | 17                | 20710                   | 1902                            | 23                                           | 22                                       | 6                | 1.96E+09           | 2.09E+09           | 1.81E+09           | 1.99E+09           | 2.04E+09               | 2.12E+09               | 1.94E+09               | 2.12E+09               |
| 116 | Q13200    | 26S proteasome non-ATPase regulatory subunit 2 [OS=Homo sapiens]                                    | 290.9         | 48           | 29         | 1102   | 29                | 13561                   | 1213                            | 29                                           | 28                                       | 0                | 9.80E+08           | 1.02E+09           | 9.89E+08           | 1.04E+09           | 1.06E+09               | 1.08E+09               | 1.04E+09               | 1.09E+09               |
| 117 | P41252    | isoleucine--tRNA ligase, cytoplasmic [OS=Homo sapiens]                                              | 288.0         | 39           | 38         | 961    | 38                | 7761                    | 1044                            | 38                                           | 36                                       | 0                | 1.17E+09           | 1.22E+09           | 1.15E+09           | 1.26E+09           | 1.52E+09               | 1.45E+09               | 1.35E+09               | 1.39E+09               |
| 118 | P31946    | 14-3-3 protein beta/alpha [OS=Homo sapiens]                                                         | 285.9         | 63           | 19         | 1737   | 11                | 26032                   | 2029                            | 19                                           | 19                                       | 2                | 8.04E+08           | 8.35E+08           | 7.72E+08           | 8.09E+08           | 8.50E+08               | 8.65E+08               | 8.42E+08               | 8.43E+08               |
| 119 | P09874    | Poly [ADP-ribose] polymerase 1 [OS=Homo sapiens]                                                    | 285.0         | 41           | 28         | 976    | 28                | 11435                   | 1291                            | 27                                           | 28                                       | 0                | 1.56E+09           | 1.60E+09           | 1.58E+09           | 1.60E+09           | 1.77E+09               | 1.74E+09               | 1.78E+09               | 1.77E+09               |
| 120 | P11940-1  | Polyadenylate-binding protein 1 [OS=Homo sapiens]                                                   | 283.5         | 46           | 23         | 1473   | 15                | 21647                   | 2093                            | 23                                           | 23                                       | 10               | 2.74E+09           | 2.79E+09           | 2.78E+09           | 2.68E+09           | 2.40E+09               | 2.47E+09               | 2.50E+09               | 2.43E+09               |
| 121 | P06753-2  | Isoform 2 of Tropomyosin alpha-3 chain [OS=Homo sapiens]                                            | 283.5         | 61           | 24         | 972    | 16                |                         | 2720                            | 24                                           |                                          | 0                | 2.06E+09           | 1.87E+09           | 2.11E+09           | 2.00E+09           | 2.03E+09               | 2.01E+09               | 2.25E+09               | 2.09E+09               |
| 122 | P30153    | serine/threonine-protein phosphatase 2A 65 kDa regulatory subunit A alpha isoform [OS=Homo sapiens] | 281.3         | 53           | 23         | 1096   | 19                | 22963                   | 1864                            | 21                                           | 23                                       | 4                | 1.38E+09           | 1.24E+09           | 1.31E+09           | 1.36E+09           | 1.47E+09               | 1.32E+09               | 1.40E+09               | 1.40E+09               |
| 123 | Q7Z627    | E3 ubiquitin-protein ligase HUWE1 [OS=Homo sapiens]                                                 | 277.6         | 15           | 34         | 789    | 34                | 11299                   | 998                             | 33                                           | 34                                       | 0                | 6.92E+08           | 7.01E+08           | 7.12E+08           | 7.40E+08           | 7.96E+08               | 7.25E+08               | 7.24E+08               | 7.27E+08               |
| 124 | P34897-1  | Serine hydroxymethyltransferase, mitochondrial [OS=Homo sapiens]                                    | 276.8         | 56           | 21         | 1404   | 20                | 23761                   | 2236                            | 21                                           | 21                                       | 1                | 2.60E+09           | 2.66E+09           | 2.65E+09           | 2.58E+09           | 2.61E+09               | 2.61E+09               | 2.61E+09               | 2.63E+09               |
| 125 | Q86VP6-1  | cullin-associated nedd8-dissociated protein 1 [OS=Homo sapiens]                                     | 276.2         | 35           | 28         | 1435   | 28                | 18815                   | 1763                            | 27                                           | 28                                       | 0                | 1.16E+09           | 1.26E+09           | 1.20E+09           | 1.28E+09           | 1.33E+09               | 1.29E+09               | 1.20E+09               | 1.25E+09               |
| 126 | P63241-1  | Eukaryotic translation initiation factor 5A-1 [OS=Homo sapiens]                                     | 273.2         | 83           | 16         | 1559   | 16                | 31088                   | 2512                            | 15                                           | 16                                       | 0                | 4.40E+09           | 4.53E+09           | 4.46E+09           | 4.12E+09           | 3.00E+09               | 3.13E+09               | 3.11E+09               | 3.04E+09               |
| 127 | P31948    | stress-induced-phosphoprotein 1 [OS=Homo sapiens]                                                   | 272.7         | 51           | 27         | 1280   | 27                | 12990                   | 1506                            | 27                                           | 27                                       | 0                | 2.37E+09           | 2.28E+09           | 2.34E+09           | 2.44E+09           | 2.43E+09               | 2.34E+09               | 2.54E+09               | 2.35E+09               |
| 128 | O95373    | Importin-7 [OS=Homo sapiens]                                                                        | 272.1         | 35           | 25         | 1051   | 25                | 12585                   | 1314                            | 25                                           | 25                                       | 0                | 6.74E+08           | 7.84E+08           | 7.41E+08           | 7.83E+08           | 8.35E+08               | 8.28E+08               | 8.28E+08               | 8.71E+08               |
| 129 | P51991-1  | Heterogeneous nuclear ribonucleoprotein A3 [OS=Homo sapiens]                                        | 269.0         | 50           | 24         | 1404   | 6                 | 13435                   | 1755                            | 23                                           | 24                                       | 16               | 1.65E+09           | 1.78E+09           | 1.62E+09           | 1.65E+09           | 1.81E+09               | 1.91E+09               | 1.80E+09               | 1.88E+09               |
| 130 | P18206    | Vinculin [OS=Homo sapiens]                                                                          | 269.0         | 38           | 27         | 923    | 27                | 14506                   | 1307                            | 27                                           | 27                                       | 0                | 8.41E+08           | 9.11E+08           | 8.53E+08           | 8.73E+08           | 1.17E+09               | 1.08E+09               | 1.06E+09               | 1.09E+09               |
| 131 | P27348    | 14-3-3 protein theta [OS=Homo sapiens]                                                              | 268.9         | 63           | 20         | 1846   | 14                | 31026                   | 2331                            | 19                                           | 20                                       | 6                | 1.68E+09           | 1.70E+09           | 1.57E+09           | 1.73E+09           | 1.59E+09               | 1.61E+09               | 1.58E+09               | 1.57E+09               |
| 132 | P35241-1  | radixin [OS=Homo sapiens]                                                                           | 267.9         | 49           | 29         | 2364   | 15                | 21579                   | 2229                            | 29                                           | 29                                       | 0                | 5.37E+08           | 5.84E+08           | 5.95E+08           | 6.01E+08           | 8.44E+08               | 8.34E+08               | 8.10E+08               | 8.10E+08               |
| 133 | P61978-3  | Isoform 3 of Heterogeneous nuclear ribonucleoprotein K [OS=Homo sapiens]                            | 266.9         | 53           | 26         | 1305   | 1                 |                         | 3730                            | 26                                           |                                          | 0                | 1.79E+07           | 1.58E+07           | 1.59E+07           | 1.36E+07           | 2.66E+07               | 2.27E+07               | 2.63E+07               | 2.73E+07               |
| 134 | P23381    | Tryptophan--tRNA ligase, cytoplasmic [OS=Homo sapiens]                                              | 266.5         | 69           | 23         | 1530   | 23                | 24830                   | 2050                            | 22                                           | 23                                       | 0                | 1.60E+09           | 1.66E+09           | 1.61E+09           | 1.63E+09           | 1.62E+09               | 1.61E+09               | 1.42E+09               | 1.64E+09               |
| 135 | Q12906-1  | Interleukin enhancer-binding factor 3 [OS=Homo sapiens]                                             | 265.5         | 46           | 25         | 1031   | 22                | 12503                   | 1333                            | 24                                           | 25                                       | 3                | 2.36E+09           | 2.30E+09           | 2.15E+09           | 2.30E+09           | 2.06E+09               | 2.24E+09               | 2.36E+09               | 2.20E+09               |
| 136 | P12429    | annexin A3 [OS=Homo sapiens]                                                                        | 264.1         | 74           | 25         | 1492   | 25                | 20782                   | 2030                            | 24                                           | 25                                       | 0                | 3.32E+09           | 3.43E+09           | 3.31E+09           | 3.17E+09           | 3.06E+09               | 3.03E+09               | 3.04E+09               | 3.12E+09               |
| 137 | P63244    | Receptor of activated protein C kinase 1 [OS=Homo sapiens]                                          | 263.3         | 79           | 18         | 1444   | 18                | 26751                   | 2287                            | 18                                           | 18                                       | 0                | 5.25E+09           | 4.99E+09           | 5.34E+09           | 5.04E+09           | 4.67E+09               | 4.97E+09               | 5.15E+09               | 4.78E+09               |
| 138 | P27695    | DNA-(apurinic or pyrimidinic site) lyase [OS=Homo sapiens]                                          | 262.6         | 72           | 18         | 1149   | 18                | 17875                   | 1828                            | 18                                           | 18                                       | 0                | 1.70E+09           | 1.73E+09           | 1.64E+09           | 1.67E+09           | 1.85E+09               | 1.90E+09               | 1.76E+09               | 1.81E+09               |
| 139 | P37802    | Transgelin-2 [OS=Homo sapiens]                                                                      | 259.8         | 91           | 20         | 3158   | 20                | 59662                   | 5011                            | 19                                           | 20                                       | 0                | 8.60E+09           | 8.89E+09           | 8.35E+09           | 8.63E+09           | 1.02E+10               | 1.03E+10               | 9.52E+09               | 9.92E+09               |
| 140 | P40227-1  | T-complex protein 1 subunit zeta [OS=Homo sapiens]                                                  | 259.2         | 57           | 25         | 1630   | 25                | 22119                   | 2119                            | 25                                           | 25                                       | 0                | 3.02E+09           | 2.98E+09           | 3.00E+09           | 2.87E+09           | 2.79E+09               | 2.96E+09               | 3.09E+09               | 2.93E+09               |
| 141 | P08865    | 40S ribosomal protein SA [OS=Homo sapiens]                                                          | 258.0         | 64           | 18         | 1365   | 18                | 28296                   | 2454                            | 16                                           | 18                                       | 0                | 4.53E+09           | 4.61E+09           | 4.57E+09           | 4.73E+09           | 4.65E+09               | 4.62E+09               | 4.00E+09               | 4.32E+09               |
| 142 | Q9Y4L1    | Hypoxia up-regulated protein 1 [OS=Homo sapiens]                                                    | 257.3         | 36           | 26         | 896    | 26                | 11678                   | 1173                            | 26                                           | 26                                       | 0                | 1.07E+09           | 1.07E+09           | 9.91E+08           | 1.11E+09           | 1.41E+09               | 1.34E+09               | 1.37E+09               | 1.39E+09               |
| 143 | P22102-1  | trifunctional purine biosynthetic protein adenosine-3 [OS=Homo sapiens]                             | 256.8         | 42           | 30         | 1040   | 30                | 15363                   | 1583                            | 30                                           | 29                                       | 0                | 1.49E+09           | 1.59E+09           | 1.55E+09           | 1.63E+09           | 1.70E+09               | 1.72E+09               | 1.72E+09               | 1.73E+09               |
| 144 | Q06210-1  | glutamine--fructose-6-phosphate aminotransferase [isomerizing] 1 [OS=Homo sapiens]                  | 256.6         | 48           | 27         | 767    | 27                | 7844                    | 910                             | 27                                           | 26                                       | 0                | 7.91E+08           | 8.43E+08           | 7.91E+08           | 8.91E+08           | 7.10E+08               | 8.32E+08               | 7.09E+08               | 6.60E+08               |
| 145 | P63104-1  | 14-3-3 protein zeta/delta [OS=Homo sapiens]                                                         | 255.8         | 63           | 19         | 2394   | 14                | 41022                   | 3199                            | 19                                           | 19                                       | 1                | 3.90E+09           | 4.07E+09           | 3.89E+09           | 4.17E+09           | 3.99E+09               | 4.03E+09               | 3.93E+09               | 4.08E+09               |
| 146 | P50990    | T-complex protein 1 subunit theta [OS=Homo sapiens]                                                 | 254.3         | 51           | 24         | 1301   | 24                | 18745                   | 1854                            | 24                                           | 24                                       | 0                | 2.78E+09           | 2.77E+09           | 2.80E+09           | 2.80E+09           | 2.88E+09               | 2.88E+09               | 2.93E+09               | 2.87E+09               |
| 147 | P35221    | Catenin alpha-1 [OS=Homo sapiens]                                                                   | 253.6         | 43           | 24         | 760    | 24                | 14544                   | 1049                            | 23                                           | 24                                       | 0                | 1.02E+09           | 1.05E+09           | 1.08E+09           | 1.09E+09           | 1.45E+09               | 1.43E+09               | 1.44E+09               | 1.49E+09               |
| 148 | P14866    | Heterogeneous nuclear ribonucleoprotein L [OS=Homo sapiens]                                         | 252.6         | 64           | 18         | 814    | 18                | 11085                   | 1323                            | 18                                           | 18                                       | 0                | 1.14E+09           | 1.21E+09           | 1.13E+09           | 1.24E+09           | 1.19E+09               | 1.22E+09               | 1.11E+09               | 1.21E+09               |
| 149 | P13489    | Ribonuclease inhibitor [OS=Homo sapiens]                                                            | 252.5         | 67           | 19         | 1071   | 19                | 22133                   | 1779                            | 19                                           | 19                                       | 0                | 9.96E+08           | 1.03E+09           | 9.76E+08           | 9.77E+08           | 9.70E+08               | 9.63E+08               | 9.00E+08               | 9.67E+08               |
| 150 | O15067    | Phosphoribosylformylglycinamide synthase [OS=Homo sapiens]                                          | 251.3         | 33           | 25         | 733    | 25                | 8561                    | 1108                            | 24                                           | 25                                       | 0                | 8.70E+08           | 8.85E+08           | 8.76E+08           | 8.72E+08           | 6.61E+08               | 7.05E+08               | 6.41E+08               | 6.66E+08               |
| 151 | O43175    | D-3-phosphoglycerate dehydrogenase [OS=Homo sapiens]                                                | 250.7         | 52           | 19         | 1464   | 19                | 21834                   | 1916                            | 19                                           | 19                                       | 0                | 2.67E+09           | 2.72E+09           | 2.60E+09           | 2.67E+09           | 2.89E+09               | 2.82E+09               | 2.76E+09               | 2.85E+09               |
| 152 | Q15084-1  | Protein disulfide-isomerase A6 [OS=Homo sapiens]                                                    | 249.7         | 51           | 17         | 1548   | 17                | 23987                   | 2458                            | 17                                           | 17                                       | 0                | 2.46E+09           | 2.75E+09           | 2.51E+09           | 2.52E+09           | 3.50E+09               | 3.51E+09               | 3.12E+09               | 3.46E+09               |
| 153 | Q9UJ21    | Stomatin-like protein 2, mitochondrial [OS=Homo sapiens]                                            | 248.5         | 61           | 15         | 1484   | 15                | 40783                   | 2593                            | 15                                           | 15                                       | 0                | 1.80E+09           | 1.88E+09           | 1.73E+09           | 1.94E+09           | 1.80E+09               | 1.79E+09               | 1.67E+09               | 1.73E+09               |
| 154 | P68032    | Actin, alpha cardiac muscle 1 [OS=Homo sapiens]                                                     | 248.1         | 47           | 18         | 5344   | 3                 | 57518                   | 5864                            | 17                                           | 18                                       | 0                | 5.53E+09           | 5.61E+09           | 5.34E+09           | 4.95E+09           | 4.77E+09               | 4.82E+09               | 4.84E+09               | 4.52E+09               |
| 155 | Q7KZF4    | staphylococcal nuclease domain-containing protein 1 [OS=Homo sapiens]                               | 247.7         | 42           | 23         | 770    | 23                | 8531                    | 1069                            | 23                                           | 22                                       | 0                | 7.21E+08           | 7.34E+08           | 7.28E+08           | 8.04E+08           | 7.83E+08               | 8.03E+08               | 8.01E+08               | 7.63E+08               |
| 156 | Q7Z406-6  | Isoform 6 of Myosin-14 [OS=Homo sapiens]                                                            | 247.0         | 26           | 37         | 406    | 30                |                         | 1172                            | 37                                           |                                          | 1                | 8.47E+08           | 8.21E+08           | 7.91E+08           | 7.66E+08           | 3.90E+08               | 3.92E+08               | 4.05E+08               | 4.07E+08               |
| 157 | Q9BSJ8    | Extended synaptotagmin-1 [OS=Homo sapiens]                                                          | 245.4         | 35           | 23         | 666    | 23                | 10891                   | 916                             | 23                                           | 23                                       | 0                | 5.39E+08           | 5.50E+08           | 4.95E+08           | 5.12E+08           | 8.24E+08               | 8.11E+08               | 7.98E+08               | 8.03E+08               |
| 158 | P30041    | Peroxiredoxin-6 [OS=Homo sapiens]                                                                   | 243.8         | 85           | 19         | 2004   | 19                | 31322                   | 2488                            | 18                                           | 19                                       | 0                | 3.90E+09           | 3.90E+09           | 3.82E+09           | 3.74E+09           | 4.68E+09               | 4.79E+09               | 4.45E+09               | 4.86E+09               |
| 159 | P12268    | inosine-5--monophosphate dehydrogenase 2 [OS=Homo sapiens]                                          | 243.5         | 49           | 19         | 649    | 19                | 8556                    | 1038                            | 19                                           | 19                                       | 0                | 1.65E+09           | 1.66E+09           | 1.65E+09           | 1.61E+09           | 1.62E+09               | 1.61E+09               | 1.62E+09               | 1.60E+09               |
| 160 | Q6DD88    | Atlastin-3 [OS=Homo sapiens]                                                                        | 242.4         | 54           | 18         | 1214   | 17                | 16943                   | 1733                            | 18                                           | 18                                       | 1                | 1.04E+09           | 1.15E+09           | 1.12E+09           | 1.16E+09           | 1.26E+09               | 1.27E+09               | 1.15E+09               | 1.23E+09               |
| 161 | P53621-1  | coatomer subunit alpha [OS=Homo sapiens]                                                            | 241.1         | 31           | 31         | 729    | 31                | 5692                    | 875                             | 31                                           | 29                                       | 0                | 1.03E+09           | 1.01E+09           | 9.79E+08           | 1.05E+09           | 1.27E+09               | 1.28E+09               | 1.21E+09               | 1.22E+09               |
| 162 | P17987    | T-complex protein 1 subunit alpha [OS=Homo sapiens]                                                 | 241.0         | 62           | 24         | 1242   | 24                | 14692                   | 1574                            | 24                                           | 24                                       | 0                | 2.03E+09           | 2.03E+09           | 2.07E+09           | 2.01E+09           | 1.90E+09               | 1.94E+09               | 2.07E+09               | 2.01E+09               |
| 163 | Q9BUF5    | Tubulin beta-b chain [OS=Homo sapiens]                                                              | 240.0         | 54           | 17         | 3113   | 7                 | 47789                   | 4406                            | 17                                           | 17                                       | 0                | 1.03E+08           | 1.03E+08           | 6.18E+07           | 1.19E+08           | 1.50E+08               | 1.66E+08               | 1.28E+08               | 1.64E+08               |
| 164 | P05455    | Lupus Lta protein [OS=Homo sapiens]                                                                 | 240.0         | 60           | 22         | 1099   | 22                | 15615                   | 1427                            | 22                                           | 20                                       | 0                | 1.65E+09           | 1.65E+09           | 1.71E+09           | 1.83E+09           | 1.58E+09               | 1.86E+09               | 1.67E+09               | 1.86E+09               |
| 165 | Q9Y617-1  | phosph                                                                                              |               |              |            |        |                   |                         |                                 |                                              |                                          |                  |                    |                    |                    |                    |                        |                        |                        |                        |

| No. | Accession | Description                                                                                | Sum PEP Score | Coverage [%] | # Peptides | # PSMs | # Unique Peptides | Score Mascot: A5 Mascot | Score Request HT: A2 Request HT | # Peptides (by Search Engine): A2 Request HT | # Peptides (by Search Engine): A5 Mascot | # Razor Peptides | ctrl Abundance_s_1 | ctrl Abundance_s_2 | ctrl Abundance_s_3 | ctrl Abundance_s_4 | JAM-A KO Abundance_s_1 | JAM-A KO Abundance_s_2 | JAM-A KO Abundance_s_3 | JAM-A KO Abundance_s_4 |
|-----|-----------|--------------------------------------------------------------------------------------------|---------------|--------------|------------|--------|-------------------|-------------------------|---------------------------------|----------------------------------------------|------------------------------------------|------------------|--------------------|--------------------|--------------------|--------------------|------------------------|------------------------|------------------------|------------------------|
| 167 | P58107    | Epiplakin OS=Homo sapiens OX=9606 GN=EPPK1 PE=1 SV=3                                       | 236.7         | 26           | 17         | 368    | 10                | 13575                   |                                 |                                              | 17                                       | 0                | 2.88.E+08          | 2.97.E+08          | 2.71.E+08          | 3.04.E+08          | 2.11.E+08              | 1.46.E+08              | 1.35.E+08              | 1.53.E+08              |
| 168 | P62701    | 40S ribosomal protein S4, X isoform [OS=Homo sapiens]                                      | 236.1         | 67           | 22         | 1987   | 22                | 15246                   | 2472                            | 22                                           | 21                                       | 0                | 4.78.E+09          | 4.58.E+09          | 4.91.E+09          | 4.77.E+09          | 4.24.E+09              | 4.26.E+09              | 4.74.E+09              | 4.44.E+09              |
| 169 | P00390    | Glutathione reductase, mitochondrial [OS=Homo sapiens]                                     | 235.7         | 64           | 19         | 769    | 19                | 12588                   | 1252                            | 19                                           | 19                                       | 0                | 1.29.E+09          | 1.31.E+09          | 1.33.E+09          | 1.33.E+09          | 1.83.E+09              | 1.89.E+09              | 1.99.E+09              | 1.95.E+09              |
| 170 | P49591    | Serine-tRNA ligase, cytoplasmic [OS=Homo sapiens]                                          | 235.3         | 54           | 21         | 1444   | 21                | 16539                   | 1859                            | 20                                           | 21                                       | 0                | 2.06.E+09          | 2.06.E+09          | 1.99.E+09          | 1.97.E+09          | 2.15.E+09              | 2.16.E+09              | 2.08.E+09              | 2.21.E+09              |
| 171 | P04844-1  | Dolichyl-diphosphooligosaccharide--protein glycosyltransferase subunit 2 [OS=Homo sapiens] | 235.0         | 46           | 15         | 988    | 15                | 21179                   | 1854                            | 15                                           | 15                                       | 0                | 8.30.E+08          | 8.60.E+08          | 7.94.E+08          | 8.54.E+08          | 1.12.E+09              | 1.00.E+09              | 9.26.E+08              | 9.92.E+08              |
| 172 | P55786    | puromycin-sensitive aminopeptidase [OS=Homo sapiens]                                       | 234.9         | 36           | 23         | 771    | 23                | 6775                    | 984                             | 23                                           | 23                                       | 0                | 9.38.E+08          | 9.95.E+08          | 9.87.E+08          | 9.99.E+08          | 1.91.E+09              | 2.02.E+09              | 1.64.E+09              | 1.84.E+09              |
| 173 | P55209    | Nucleosome assembly protein 1-like 1 [OS=Homo sapiens]                                     | 233.2         | 57           | 17         | 1004   | 15                | 15567                   | 1592                            | 15                                           | 17                                       | 2                | 1.85.E+09          | 1.94.E+09          | 1.74.E+09          | 1.96.E+09          | 2.41.E+09              | 2.42.E+09              | 2.11.E+09              | 2.35.E+09              |
| 174 | Q13263    | Transcription intermediary factor 1-beta [OS=Homo sapiens]                                 | 232.5         | 47           | 20         | 716    | 20                | 13723                   | 1063                            | 19                                           | 20                                       | 0                | 1.12.E+09          | 1.19.E+09          | 1.08.E+09          | 1.09.E+09          | 7.46.E+08              | 6.30.E+08              | 5.72.E+08              | 6.70.E+08              |
| 175 | P07099    | epoxide hydrolase 1 [OS=Homo sapiens]                                                      | 232.2         | 50           | 22         | 1171   | 22                | 14057                   | 1786                            | 22                                           | 20                                       | 0                | 2.55.E+09          | 2.54.E+09          | 2.52.E+09          | 2.48.E+09          | 2.78.E+09              | 2.71.E+09              | 2.78.E+09              | 2.75.E+09              |
| 176 | P07737    | profilin-1 [OS=Homo sapiens]                                                               | 229.5         | 91           | 14         | 1930   | 14                | 37067                   | 2328                            | 12                                           | 14                                       | 0                | 9.36.E+09          | 9.39.E+09          | 8.47.E+09          | 9.02.E+09          | 6.47.E+09              | 6.63.E+09              | 5.73.E+09              | 6.49.E+09              |
| 177 | P26639-1  | Threonine-tRNA ligase, cytoplasmic [OS=Homo sapiens]                                       | 229.4         | 46           | 29         | 1258   | 29                | 12605                   | 1612                            | 29                                           | 29                                       | 0                | 2.01.E+09          | 2.05.E+09          | 2.01.E+09          | 2.02.E+09          | 1.98.E+09              | 2.12.E+09              | 1.89.E+09              | 2.06.E+09              |
| 178 | P11166    | Solute carrier family 2, facilitated glucose transporter member 1 [OS=Homo sapiens]        | 228.3         | 37           | 18         | 1444   | 17                | 17317                   | 1975                            | 18                                           | 17                                       | 1                | 1.14.E+10          | 1.07.E+10          | 1.07.E+10          | 9.72.E+09          | 9.20.E+09              | 9.29.E+09              | 1.01.E+10              | 9.36.E+09              |
| 179 | O00159-1  | Unconventional myosin-Ic [OS=Homo sapiens]                                                 | 227.4         | 34           | 26         | 758    | 25                | 9107                    | 1004                            | 26                                           | 26                                       | 1                | 1.03.E+09          | 1.11.E+09          | 1.03.E+09          | 1.12.E+09          | 6.70.E+08              | 7.69.E+08              | 6.17.E+08              | 7.60.E+08              |
| 180 | Q92616    | eIF-2-alpha kinase activator GCN1 [OS=Homo sapiens]                                        | 227.5         | 18           | 33         | 811    | 33                | 8895                    | 806                             | 33                                           | 32                                       | 0                | 5.83.E+08          | 6.25.E+08          | 5.90.E+08          | 5.76.E+08          | 5.72.E+08              | 6.29.E+08              | 5.21.E+08              | 6.45.E+08              |
| 181 | P62805    | histone H4 [OS=Homo sapiens]                                                               | 227.2         | 58           | 13         | 3192   | 13                | 48786                   | 4460                            | 13                                           | 12                                       | 0                | 5.50.E+10          | 5.28.E+10          | 5.63.E+10          | 5.25.E+10          | 4.80.E+10              | 4.84.E+10              | 5.22.E+10              | 4.96.E+10              |
| 182 | Q16555-1  | Dihydropyrimidinase-related protein 2 [OS=Homo sapiens]                                    | 226.2         | 53           | 19         | 642    | 19                | 8989                    | 947                             | 19                                           | 19                                       | 0                | 4.71.E+08          | 4.73.E+08          | 4.48.E+08          | 4.24.E+08          | 9.53.E+08              | 9.41.E+08              | 9.35.E+08              | 9.44.E+08              |
| 183 | O75533-1  | splicing factor 3B subunit 1 [OS=Homo sapiens]                                             | 223.7         | 24           | 21         | 782    | 21                | 8741                    | 887                             | 21                                           | 21                                       | 0                | 5.95.E+08          | 5.98.E+08          | 6.08.E+08          | 5.38.E+08          | 5.82.E+08              | 5.94.E+08              | 5.60.E+08              | 6.34.E+08              |
| 184 | P30043    | flavin reductase (NADPH) [OS=Homo sapiens]                                                 | 223.4         | 87           | 14         | 1011   | 14                | 15357                   | 1849                            | 14                                           | 14                                       | 0                | 1.55.E+09          | 1.67.E+09          | 1.40.E+09          | 1.58.E+09          | 1.76.E+09              | 1.79.E+09              | 1.53.E+09              | 1.76.E+09              |
| 185 | P36871-1  | Phosphoglucomutase-1 [OS=Homo sapiens]                                                     | 223.4         | 53           | 19         | 975    | 19                | 14491                   | 1238                            | 19                                           | 18                                       | 0                | 1.12.E+09          | 1.12.E+09          | 1.09.E+09          | 1.13.E+09          | 9.88.E+08              | 9.83.E+08              | 8.80.E+08              | 9.53.E+08              |
| 186 | Q14152    | Eukaryotic translation initiation factor 3 subunit A [OS=Homo sapiens]                     | 223.3         | 35           | 37         | 947    | 37                | 6186                    | 920                             | 36                                           | 35                                       | 0                | 9.64.E+08          | 9.58.E+08          | 9.31.E+08          | 9.46.E+08          | 9.18.E+08              | 9.40.E+08              | 9.54.E+08              | 9.39.E+08              |
| 187 | O60716-1  | Catenin delta-1 [OS=Homo sapiens]                                                          | 221.5         | 29           | 19         | 684    | 19                | 9287                    | 876                             | 19                                           | 18                                       | 0                | 7.29.E+08          | 7.24.E+08          | 7.24.E+08          | 7.84.E+08          | 7.88.E+08              | 7.55.E+08              | 7.42.E+08              | 7.62.E+08              |
| 188 | P09429    | High mobility group protein B1 [OS=Homo sapiens]                                           | 221.3         | 49           | 15         | 1430   | 13                | 12675                   | 1702                            | 15                                           | 15                                       | 2                | 3.89.E+09          | 3.80.E+09          | 3.91.E+09          | 4.03.E+09          | 3.90.E+09              | 3.94.E+09              | 4.28.E+09              | 3.82.E+09              |
| 189 | P08243-1  | Asparagine synthetase [glutamine-hydrolyzing] [OS=Homo sapiens]                            | 221.3         | 51           | 23         | 1212   | 23                | 15907                   | 1306                            | 23                                           | 23                                       | 0                | 1.93.E+09          | 1.87.E+09          | 1.90.E+09          | 2.01.E+09          | 2.08.E+09              | 2.02.E+09              | 2.14.E+09              | 2.07.E+09              |
| 190 | P49411    | elongation factor Tu, mitochondrial [OS=Homo sapiens]                                      | 220.3         | 55           | 20         | 1058   | 20                | 11557                   | 1486                            | 20                                           | 18                                       | 0                | 1.41.E+09          | 1.41.E+09          | 1.37.E+09          | 1.38.E+09          | 1.34.E+09              | 1.33.E+09              | 1.36.E+09              | 1.32.E+09              |
| 191 | Q3ZCM7    | tubulin beta-8 chain [OS=Homo sapiens]                                                     | 219.5         | 29           | 12         | 3112   | 1                 | 43563                   | 4361                            | 11                                           | 12                                       | 0                | 4.59.E+07          | 3.80.E+07          | 2.96.E+07          | 3.66.E+07          | 6.85.E+07              | 5.15.E+07              | 6.08.E+07              | 4.87.E+07              |
| 192 | Q6P2Q9    | Pre-mRNA-processing-splicing factor 8 [OS=Homo sapiens]                                    | 219.3         | 19           | 32         | 778    | 32                | 8439                    | 672                             | 32                                           | 32                                       | 0                | 6.93.E+08          | 6.75.E+08          | 6.88.E+08          | 6.72.E+08          | 6.54.E+08              | 6.49.E+08              | 6.28.E+08              | 6.50.E+08              |
| 193 | P62424    | 60S ribosomal protein L7a [OS=Homo sapiens]                                                | 218.2         | 62           | 19         | 1164   | 19                | 12978                   | 1704                            | 19                                           | 18                                       | 0                | 3.18.E+09          | 2.91.E+09          | 3.19.E+09          | 3.30.E+09          | 2.52.E+09              | 2.48.E+09              | 2.79.E+09              | 2.60.E+09              |
| 194 | O43776    | Asparagine-tRNA ligase, cytoplasmic [OS=Homo sapiens]                                      | 217.5         | 47           | 22         | 684    | 22                | 7619                    | 847                             | 21                                           | 19                                       | 0                | 1.33.E+09          | 1.15.E+09          | 1.18.E+09          | 1.13.E+09          | 1.49.E+09              | 1.50.E+09              | 1.47.E+09              | 1.53.E+09              |
| 195 | P67809    | Nuclease-sensitive element-binding protein 1 [OS=Homo sapiens]                             | 217.4         | 64           | 12         | 962    | 7                 | 13565                   | 1290                            | 11                                           | 12                                       | 5                | 1.36.E+09          | 1.37.E+09          | 1.39.E+09          | 1.59.E+09          | 1.51.E+09              | 1.48.E+09              | 1.56.E+09              | 1.57.E+09              |
| 196 | P52597    | Heterogeneous nuclear ribonucleoprotein F [OS=Homo sapiens]                                | 217.1         | 58           | 15         | 1179   | 13                | 18349                   | 1689                            | 15                                           | 15                                       | 2                | 2.20.E+09          | 2.19.E+09          | 2.16.E+09          | 2.43.E+09          | 2.12.E+09              | 2.10.E+09              | 2.13.E+09              | 2.09.E+09              |
| 197 | Q12905    | Interleukin enhancer-binding factor 2 [OS=Homo sapiens]                                    | 216.9         | 73           | 19         | 932    | 19                | 12930                   | 1338                            | 19                                           | 19                                       | 0                | 1.93.E+09          | 1.87.E+09          | 1.95.E+09          | 1.74.E+09          | 1.95.E+09              | 1.97.E+09              | 1.75.E+09              | 1.95.E+09              |
| 198 | P61981    | 14-3-3 protein gamma [OS=Homo sapiens]                                                     | 216.3         | 71           | 18         | 1808   | 12                | 26655                   | 2347                            | 17                                           | 17                                       | 0                | 1.51.E+09          | 1.44.E+09          | 1.39.E+09          | 1.56.E+09          | 1.40.E+09              | 1.39.E+09              | 1.42.E+09              | 1.42.E+09              |
| 199 | Q14566    | DNA replication licensing factor MCM6 [OS=Homo sapiens]                                    | 216.0         | 42           | 26         | 716    | 26                | 6703                    | 850                             | 26                                           | 26                                       | 0                | 1.21.E+09          | 1.36.E+09          | 1.36.E+09          | 1.22.E+09          | 1.51.E+09              | 1.57.E+09              | 1.49.E+09              | 1.41.E+09              |
| 200 | P49368-1  | T-complex protein 1 subunit gamma [OS=Homo sapiens]                                        | 214.5         | 56           | 22         | 1304   | 22                | 15927                   | 1881                            | 22                                           | 21                                       | 0                | 2.92.E+09          | 2.91.E+09          | 2.92.E+09          | 2.90.E+09          | 2.75.E+09              | 2.87.E+09              | 2.91.E+09              | 2.88.E+09              |
| 201 | P46821    | microtubule-associated protein 1B [OS=Homo sapiens]                                        | 213.3         | 17           | 25         | 321    | 25                | 4909                    | 427                             | 25                                           | 25                                       | 0                | 1.55.E+08          | 1.37.E+08          | 1.80.E+08          | 1.62.E+08          | 3.24.E+08              | 3.21.E+08              | 2.94.E+08              | 3.45.E+08              |
| 202 | P14923    | Junction plakoglobin [OS=Homo sapiens]                                                     | 213.0         | 41           | 19         | 699    | 15                | 13279                   | 1002                            | 19                                           | 19                                       | 0                | 4.85.E+08          | 5.30.E+08          | 4.89.E+08          | 4.85.E+08          | 5.04.E+08              | 5.11.E+08              | 5.18.E+08              | 5.40.E+08              |
| 203 | P34932    | Heat shock 70 kDa protein 4 [OS=Homo sapiens]                                              | 212.8         | 37           | 22         | 780    | 21                | 12676                   | 1052                            | 22                                           | 22                                       | 1                | 9.17.E+08          | 9.17.E+08          | 8.80.E+08          | 8.47.E+08          | 1.00.E+09              | 9.80.E+08              | 9.39.E+08              | 9.75.E+08              |
| 204 | P35222    | Catenin beta-1 [OS=Homo sapiens]                                                           | 212.6         | 35           | 19         | 757    | 15                | 11055                   | 965                             | 19                                           | 19                                       | 3                | 8.63.E+08          | 8.58.E+08          | 8.48.E+08          | 8.28.E+08          | 1.09.E+09              | 1.05.E+09              | 1.10.E+09              | 1.09.E+09              |
| 205 | Q9Y678    | Coatamer subunit gamma-1 [OS=Homo sapiens]                                                 | 212.4         | 46           | 25         | 1131   | 24                | 13782                   | 1212                            | 25                                           | 25                                       | 1                | 6.69.E+08          | 7.61.E+08          | 6.72.E+08          | 7.22.E+08          | 9.41.E+08              | 8.71.E+08              | 8.33.E+08              | 8.95.E+08              |
| 206 | P33991    | DNA replication licensing factor MCM4 [OS=Homo sapiens]                                    | 212.0         | 35           | 22         | 883    | 22                | 9552                    | 1072                            | 22                                           | 22                                       | 0                | 7.28.E+08          | 6.95.E+08          | 7.40.E+08          | 7.81.E+08          | 8.56.E+08              | 8.79.E+08              | 8.13.E+08              | 8.66.E+08              |
| 207 | O75083    | WD repeat-containing protein 1 [OS=Homo sapiens]                                           | 210.2         | 59           | 20         | 706    | 20                | 7354                    | 1040                            | 20                                           | 20                                       | 0                | 1.01.E+09          | 1.10.E+09          | 1.10.E+09          | 1.16.E+09          | 1.73.E+09              | 1.79.E+09              | 1.66.E+09              | 1.69.E+09              |
| 208 | P19367-1  | Hexokinase-1 [OS=Homo sapiens]                                                             | 209.4         | 33           | 25         | 620    | 25                | 8847                    | 770                             | 25                                           | 25                                       | 0                | 6.76.E+08          | 6.55.E+08          | 6.53.E+08          | 6.79.E+08          | 6.62.E+08              | 6.37.E+08              | 6.17.E+08              | 6.34.E+08              |
| 209 | P43243    | Matrin-3 [OS=Homo sapiens]                                                                 | 208.9         | 33           | 20         | 1157   | 20                | 15624                   | 1689                            | 20                                           | 20                                       | 0                | 1.30.E+09          | 1.35.E+09          | 1.29.E+09          | 1.31.E+09          | 1.46.E+09              | 1.45.E+09              | 1.39.E+09              | 1.46.E+09              |
| 210 | P48506    | glutamate-cysteine ligase catalytic subunit [OS=Homo sapiens]                              | 208.7         | 45           | 23         | 648    | 23                | 8034                    | 917                             | 21                                           | 23                                       | 0                | 7.92.E+08          | 8.02.E+08          | 8.02.E+08          | 7.48.E+08          | 7.75.E+08              | 8.23.E+08              | 7.86.E+08              | 7.82.E+08              |
| 211 | Q13501-1  | sequestosome-1 [OS=Homo sapiens]                                                           | 208.0         | 54           | 15         | 697    | 15                | 11205                   | 981                             | 15                                           | 15                                       | 0                | 8.22.E+08          | 8.35.E+08          | 8.29.E+08          | 8.13.E+08          | 9.75.E+08              | 9.30.E+08              | 8.00.E+08              | 1.06.E+09              |
| 212 | Q9NR30-1  | Nucleolar RNA helicase 2 [OS=Homo sapiens]                                                 | 208.0         | 37           | 23         | 752    | 21                | 11245                   | 1136                            | 23                                           | 22                                       | 2                | 1.02.E+09          | 1.06.E+09          | 1.06.E+09          | 1.14.E+09          | 1.14.E+09              | 1.13.E+09              | 1.03.E+09              | 1.11.E+09              |
| 213 | P02786    | Transferrin receptor protein 1 [OS=Homo sapiens]                                           | 207.6         | 35           | 21         | 1308   | 21                | 14115                   | 1905                            | 21                                           | 21                                       | 0                | 1.94.E+09          | 2.02.E+09          | 1.88.E+09          | 1.96.E+09          | 2.64.E+09              | 2.63.E+09              | 2.46.E+09              | 2.54.E+09              |
| 214 | P40926    | Malate dehydrogenase, mitochondrial [OS=Homo sapiens]                                      | 205.9         | 61           | 17         | 1808   | 17                | 33654                   | 2720                            | 16                                           | 17                                       | 0                | 6.54.E+09          | 6.74.E+09          | 6.59.E+09          | 6.57.E+09          | 5.84.E+09              | 5.92.E+09              | 5.36.E+09              | 5.95.E+09              |
| 215 | P05388    | 60S acidic ribosomal protein P0 [OS=Homo sapiens]                                          | 205.6         | 55           | 16         | 1287   | 16                | 22885                   | 2146                            | 16                                           | 15                                       | 0                | 4.09.E+09          | 4.16.E+09          | 3.81.E+09          | 4.23.E+09          | 4.08.E+09              | 4.20.E+09              | 3.95.E+09              | 4.05.E+09              |
| 216 | P27824    | Calnexin [OS=Homo sapiens]                                                                 | 205.4         | 47           | 19         | 1252   | 19                | 17855                   | 1827                            | 18                                           | 18                                       | 0                | 2.04.E+09          | 2.13.E+09          | 2.08.E+09          | 1.96.E+09          | 2.52.E+09              | 2.38.E+09              | 2.43.E+09              | 2.50.E+09              |
| 217 | P09493-3  | Isoform 3 of Tropomyosin alpha-1 chain [OS=Homo sapiens]                                   | 205.3         | 66           | 22         | 603    | 11                | 1669                    | 22                              | 24                                           | 4                                        | 5.56.E+08        | 5.29.E+08          | 5.82.E+08          | 5.49.E+08          | 1.11.E+09          | 1.12.E+09              | 1.14.E+09              | 1.11.E+09              |                        |
| 218 | Q9BQGO    | Myb-binding protein 1A [OS=Homo sapiens]                                                   | 205.2         | 33           | 28         | 756    | 28                | 8387                    | 848                             | 28                                           | 27                                       | 0                | 5.81.E+08          | 6.02.E+08          | 5.67.E+08          | 6.03.E+08          | 3.72.E+08              | 3.45.E+08              | 2.97.E+08              | 3.52.E+08              |
| 219 | P48735    | Isocitrate dehydrogenase [NADP], mitochondrial [OS=Homo sapiens]                           | 204.9         | 54           | 23         | 1279   | 22                | 12852                   | 1402                            | 23                                           | 23                                       | 1                | 1.84.E+09          | 1.86.E+09          | 1.87.E+09          | 1.77.E+09          | 3.42.E+09              | 3.55.E+09              | 3.41.E+09              | 3.53.E+09              |
| 220 | P25205    | DNA replication licensing factor mcm3 [OS=Homo sapiens]                                    | 203.2         | 33           | 20         | 741    | 20                | 12197                   | 841                             | 19                                           | 20                                       | 0                |                    |                    |                    |                    |                        |                        |                        |                        |



| No. | Accession | Description                                                                                | Sum PEP Score | Coverage [%] | # Peptides | # PSMs | # Unique Peptides | Score Mascot: A5 Mascot | Score Sequest HT: A2 Sequest HT | # Peptides (by Search Engine): A2 Sequest HT | # Peptides (by Search Engine): A5 Mascot | # Razor Peptides | ctrl Abundance s_1 | ctrl Abundance s_2 | ctrl Abundance s_3 | ctrl Abundance s_4 | JAM-A KO Abundance s_1 | JAM-A KO Abundance s_2 | JAM-A KO Abundance s_3 | JAM-A KO Abundance s_4 |
|-----|-----------|--------------------------------------------------------------------------------------------|---------------|--------------|------------|--------|-------------------|-------------------------|---------------------------------|----------------------------------------------|------------------------------------------|------------------|--------------------|--------------------|--------------------|--------------------|------------------------|------------------------|------------------------|------------------------|
| 226 | P20700    | Lamin-B1 [OS=Homo sapiens]                                                                 | 199.2         | 37           | 19         | 628    | 18                | 7815                    | 709                             | 19                                           | 19                                       | 0                | 8.88.E+08          | 8.97.E+08          | 8.97.E+08          | 9.26.E+08          | 8.55.E+08              | 8.55.E+08              | 8.91.E+08              | 8.89.E+08              |
| 227 | P31040    | Succinate dehydrogenase [ubiquinone] flavoprotein subunit, mitochondrial [OS=Homo sapiens] | 199.2         | 48           | 20         | 783    | 20                | 14250                   | 1150                            | 20                                           | 20                                       | 0                | 1.26.E+09          | 1.22.E+09          | 1.21.E+09          | 1.29.E+09          | 1.41.E+09              | 1.34.E+09              | 1.38.E+09              | 1.31.E+09              |
| 228 | P23284    | peptidyl-prolyl cis-trans isomerase B [OS=Homo sapiens]                                    | 198.2         | 62           | 17         | 1812   | 17                | 16778                   | 1866                            | 17                                           | 16                                       | 0                | 8.16.E+09          | 7.84.E+09          | 8.18.E+09          | 7.52.E+09          | 8.22.E+09              | 8.27.E+09              | 8.89.E+09              | 8.40.E+09              |
| 229 | P51991-2  | Isoform 2 of Heterogeneous nuclear ribonucleoprotein A3 [OS=Homo sapiens]                  | 195.4         | 47           | 19         | 610    | 1                 |                         | 1600                            | 19                                           |                                          | 0                | 2.62.E+07          | 2.79.E+07          | 2.73.E+07          | 3.11.E+07          | 3.36.E+07              | 3.03.E+07              | 3.48.E+07              | 3.51.E+07              |
| 230 | Q00341-1  | Vigilin [OS=Homo sapiens]                                                                  | 195.2         | 30           | 24         | 498    | 24                | 6566                    | 599                             | 23                                           | 24                                       | 0                | 7.42.E+08          | 7.69.E+08          | 7.47.E+08          | 7.48.E+08          | 9.03.E+08              | 9.24.E+08              | 9.19.E+08              | 9.47.E+08              |
| 231 | Q13838-1  | spliceosome RNA helicase DDX39B [OS=Homo sapiens]                                          | 194.7         | 66           | 18         | 1201   | 9                 | 15236                   | 1574                            | 17                                           | 18                                       | 9                | 2.20.E+09          | 2.29.E+09          | 2.30.E+09          | 2.16.E+09          | 2.22.E+09              | 2.32.E+09              | 2.26.E+09              | 2.29.E+09              |
| 232 | P17655-1  | Calpain-2 catalytic subunit [OS=Homo sapiens]                                              | 194.6         | 42           | 20         | 520    | 20                | 7092                    | 718                             | 20                                           | 20                                       | 0                | 5.60.E+08          | 6.41.E+08          | 5.28.E+08          | 6.75.E+08          | 7.17.E+08              | 6.16.E+08              | 6.67.E+08              | 6.69.E+08              |
| 233 | P56192    | Methionine-tRNA ligase, cytoplasmic [OS=Homo sapiens]                                      | 194.5         | 44           | 25         | 489    | 25                | 5497                    | 684                             | 25                                           | 25                                       | 0                | 6.89.E+08          | 6.57.E+08          | 6.59.E+08          | 6.77.E+08          | 7.18.E+08              | 8.00.E+08              | 6.58.E+08              | 6.84.E+08              |
| 234 | P84077    | ADP-ribosylation factor 1 [OS=Homo sapiens]                                                | 193.7         | 90           | 17         | 1029   | 11                | 10713                   | 1422                            | 15                                           | 17                                       | 6                | 2.34.E+09          | 2.38.E+09          | 2.36.E+09          | 2.31.E+09          | 2.29.E+09              | 2.35.E+09              | 2.30.E+09              | 2.37.E+09              |
| 235 | P51858    | hepatoma-derived growth factor [OS=Homo sapiens]                                           | 192.7         | 64           | 15         | 891    | 15                | 10849                   | 1453                            | 15                                           | 14                                       | 0                | 1.32.E+09          | 1.31.E+09          | 1.30.E+09          | 1.31.E+09          | 1.29.E+09              | 1.29.E+09              | 1.26.E+09              | 1.24.E+09              |
| 236 | P52272    | Heterogeneous nuclear ribonucleoprotein M [OS=Homo sapiens]                                | 192.2         | 36           | 24         | 796    | 24                | 13034                   | 1088                            | 23                                           | 24                                       | 0                | 1.30.E+09          | 1.20.E+09          | 1.14.E+09          | 1.29.E+09          | 1.47.E+09              | 1.63.E+09              | 1.53.E+09              | 1.65.E+09              |
| 237 | P21964-1  | Catechol O-methyltransferase [OS=Homo sapiens]                                             | 191.7         | 67           | 13         | 816    | 13                | 14402                   | 1545                            | 13                                           | 13                                       | 0                | 1.28.E+09          | 1.13.E+09          | 1.25.E+09          | 1.29.E+09          | 1.11.E+09              | 1.07.E+09              | 1.08.E+09              | 1.08.E+09              |
| 238 | Q99714-1  | 3-hydroxyacyl-CoA dehydrogenase type-2 [OS=Homo sapiens]                                   | 191.7         | 85           | 13         | 801    | 13                | 13356                   | 1157                            | 13                                           | 13                                       | 0                | 6.39.E+08          | 7.85.E+08          | 6.75.E+08          | 7.43.E+08          | 6.82.E+08              | 7.60.E+08              | 7.03.E+08              | 7.78.E+08              |
| 239 | P09104    | Gamma-enolase [OS=Homo sapiens]                                                            | 191.1         | 49           | 12         | 3291   | 8                 | 74649                   | 5361                            | 12                                           | 12                                       | 0                | 1.40.E+09          | 1.28.E+09          | 1.36.E+09          | 1.53.E+09          | 1.62.E+09              | 1.62.E+09              | 1.80.E+09              | 1.71.E+09              |
| 240 | P62826    | GTP-binding nuclear protein RAN [OS=Homo sapiens]                                          | 189.2         | 53           | 15         | 1271   | 15                | 16147                   | 1855                            | 14                                           | 15                                       | 0                | 4.52.E+09          | 4.50.E+09          | 4.71.E+09          | 4.25.E+09          | 4.63.E+09              | 4.74.E+09              | 4.61.E+09              | 4.54.E+09              |
| 241 | P33993-1  | DNA replication licensing factor MCM7 [OS=Homo sapiens]                                    | 187.4         | 46           | 24         | 762    | 24                | 5501                    | 771                             | 23                                           | 24                                       | 0                | 1.13.E+09          | 1.13.E+09          | 1.12.E+09          | 1.08.E+09          | 1.32.E+09              | 1.30.E+09              | 1.27.E+09              | 1.33.E+09              |
| 242 | P62136-1  | serine/threonine-protein phosphatase PP1-alpha catalytic subunit [OS=Homo sapiens]         | 187.4         | 65           | 17         | 890    | 6                 | 14988                   | 1141                            | 16                                           | 16                                       | 10               | 9.94.E+08          | 1.06.E+09          | 9.96.E+08          | 1.01.E+09          | 1.06.E+09              | 1.03.E+09              | 1.02.E+09              | 1.02.E+09              |
| 243 | O00571    | ATP-dependent RNA helicase DDX3X [OS=Homo sapiens]                                         | 187.2         | 41           | 19         | 1105   | 19                | 17163                   | 1767                            | 18                                           | 19                                       | 0                | 1.60.E+09          | 1.71.E+09          | 1.60.E+09          | 1.67.E+09          | 1.71.E+09              | 1.90.E+09              | 1.54.E+09              | 1.80.E+09              |
| 244 | P16403    | Histone H1.2 [OS=Homo sapiens]                                                             | 186.9         | 31           | 13         | 1070   | 3                 | 17650                   | 1129                            | 9                                            | 13                                       | 0                | 5.26.E+08          | 5.01.E+08          | 5.67.E+08          | 6.29.E+08          | 6.78.E+08              | 6.52.E+08              | 6.95.E+08              | 7.10.E+08              |
| 245 | P09960-1  | leukotriene A-4 hydrolase [OS=Homo sapiens]                                                | 186.1         | 49           | 20         | 544    | 20                | 6146                    | 643                             | 19                                           | 20                                       | 0                | 8.79.E+08          | 8.85.E+08          | 8.15.E+08          | 8.89.E+08          | 8.15.E+08              | 8.44.E+08              | 8.91.E+08              | 8.68.E+08              |
| 246 | P52565-1  | rho GDP-dissociation inhibitor 1 [OS=Homo sapiens]                                         | 186.0         | 75           | 9          | 1013   | 9                 | 16602                   | 1665                            | 8                                            | 9                                        | 0                | 2.54.E+09          | 2.55.E+09          | 2.46.E+09          | 2.28.E+09          | 1.73.E+09              | 1.76.E+09              | 1.75.E+09              | 1.75.E+09              |
| 247 | P52292    | Importin subunit alpha-1 [OS=Homo sapiens]                                                 | 184.7         | 50           | 14         | 948    | 14                | 16919                   | 1421                            | 14                                           | 14                                       | 0                | 9.99.E+08          | 1.12.E+09          | 1.07.E+09          | 1.06.E+09          | 9.21.E+08              | 9.41.E+08              | 7.42.E+08              | 9.15.E+08              |
| 248 | Q8IVF2-1  | Protein AHNAK2 [OS=Homo sapiens]                                                           | 184.6         | 17           | 25         | 455    | 25                | 4310                    | 453                             | 25                                           | 24                                       | 0                | 7.65.E+08          | 8.09.E+08          | 8.39.E+08          | 9.17.E+08          | 2.40.E+08              | 3.32.E+08              | 3.75.E+08              | 2.78.E+08              |
| 249 | Q15181    | Inorganic pyrophosphatase [OS=Homo sapiens]                                                | 183.3         | 63           | 12         | 793    | 11                | 13330                   | 1200                            | 12                                           | 12                                       | 1                | 1.60.E+09          | 1.67.E+09          | 1.58.E+09          | 1.50.E+09          | 1.85.E+09              | 1.88.E+09              | 1.63.E+09              | 1.86.E+09              |
| 250 | P23246-1  | splicing factor, proline- and glutamine-rich [OS=Homo sapiens]                             | 182.7         | 38           | 19         | 1047   | 18                | 13103                   | 1399                            | 19                                           | 19                                       | 1                | 4.40.E+09          | 4.07.E+09          | 4.62.E+09          | 5.21.E+09          | 4.62.E+09              | 4.64.E+09              | 5.58.E+09              | 4.97.E+09              |
| 251 | Q8WUM4    | Programmed cell death 6-interacting protein [OS=Homo sapiens]                              | 182.5         | 41           | 23         | 672    | 23                | 7123                    | 761                             | 21                                           | 23                                       | 0                | 7.35.E+08          | 7.28.E+08          | 7.47.E+08          | 6.87.E+08          | 8.11.E+08              | 8.06.E+08              | 7.82.E+08              | 8.70.E+08              |
| 252 | P54577    | Tyrosine-tRNA ligase, cytoplasmic [OS=Homo sapiens]                                        | 182.4         | 57           | 23         | 876    | 23                | 10275                   | 1167                            | 23                                           | 22                                       | 0                | 1.03.E+09          | 1.12.E+09          | 1.07.E+09          | 1.26.E+09          | 1.18.E+09              | 1.10.E+09              | 1.39.E+09              | 1.11.E+09              |
| 253 | P10412    | Histone H1.4 [OS=Homo sapiens]                                                             | 182.3         | 31           | 13         | 1022   | 3                 | 16918                   | 1129                            | 9                                            | 13                                       | 12               | 6.70.E+09          | 6.14.E+09          | 6.60.E+09          | 7.11.E+09          | 7.50.E+09              | 6.90.E+09              | 7.85.E+09              | 7.16.E+09              |
| 254 | P16435    | NADPH-cytochrome P450 reductase [OS=Homo sapiens]                                          | 182.2         | 39           | 20         | 571    | 20                | 8743                    | 722                             | 20                                           | 20                                       | 0                | 7.01.E+08          | 7.57.E+08          | 7.92.E+08          | 7.33.E+08          | 8.56.E+08              | 7.49.E+08              | 7.28.E+08              | 7.66.E+08              |
| 255 | P17844    | probable ATP-dependent RNA helicase DDX5 [OS=Homo sapiens]                                 | 181.7         | 48           | 20         | 1129   | 15                | 13445                   | 1489                            | 20                                           | 20                                       | 0                | 1.59.E+09          | 1.64.E+09          | 1.61.E+09          | 1.59.E+09          | 1.09.E+09              | 1.15.E+09              | 1.13.E+09              | 1.15.E+09              |
| 256 | O60506    | Heterogeneous nuclear ribonucleoprotein Q [OS=Homo sapiens]                                | 181.4         | 46           | 20         | 992    | 14                | 13326                   | 1194                            | 20                                           | 20                                       | 0                | 8.19.E+08          | 9.04.E+08          | 8.34.E+08          | 8.67.E+08          | 9.44.E+08              | 9.03.E+08              | 8.72.E+08              | 9.61.E+08              |
| 257 | P47897    | glutamine-tRNA ligase [OS=Homo sapiens]                                                    | 181.1         | 40           | 22         | 513    | 22                | 6378                    | 734                             | 20                                           | 21                                       | 0                | 9.09.E+08          | 9.34.E+08          | 8.87.E+08          | 8.41.E+08          | 9.57.E+08              | 9.62.E+08              | 9.78.E+08              | 9.64.E+08              |
| 258 | P41091    | eukaryotic translation initiation factor 2 subunit 3 [OS=Homo sapiens]                     | 180.5         | 48           | 16         | 889    | 16                | 9206                    | 1263                            | 15                                           | 16                                       | 0                | 1.39.E+09          | 1.31.E+09          | 1.35.E+09          | 1.43.E+09          | 1.46.E+09              | 1.42.E+09              | 1.44.E+09              | 1.43.E+09              |
| 259 | Q02878    | 60S ribosomal protein L6 [OS=Homo sapiens]                                                 | 179.3         | 52           | 22         | 1363   | 22                | 24824                   | 1778                            | 22                                           | 22                                       | 0                | 3.02.E+09          | 3.02.E+09          | 3.06.E+09          | 3.19.E+09          | 2.18.E+09              | 2.12.E+09              | 2.25.E+09              | 2.14.E+09              |
| 260 | O00567    | Nucleolar protein 56 [OS=Homo sapiens]                                                     | 178.9         | 52           | 21         | 514    | 21                | 5467                    | 542                             | 21                                           | 21                                       | 0                | 7.39.E+08          | 7.66.E+08          | 7.56.E+08          | 7.91.E+08          | 6.57.E+08              | 6.18.E+08              | 6.43.E+08              | 6.43.E+08              |
| 261 | O75874    | Isocitrate dehydrogenase [NADP] cytoplasmic [OS=Homo sapiens]                              | 178.6         | 50           | 19         | 831    | 18                | 6225                    | 821                             | 19                                           | 19                                       | 0                | 1.36.E+09          | 1.39.E+09          | 1.39.E+09          | 1.39.E+09          | 1.34.E+09              | 1.39.E+09              | 1.42.E+09              | 1.56.E+09              |
| 262 | Q99623    | Prohibitin-2 [OS=Homo sapiens]                                                             | 178.1         | 58           | 14         | 993    | 14                | 15277                   | 1378                            | 14                                           | 14                                       | 0                | 1.82.E+09          | 1.89.E+09          | 1.87.E+09          | 1.85.E+09          | 1.66.E+09              | 1.66.E+09              | 1.76.E+09              | 1.67.E+09              |
| 263 | P35606    | Coatamer subunit beta' [OS=Homo sapiens]                                                   | 177.8         | 40           | 22         | 709    | 22                | 6020                    | 717                             | 22                                           | 21                                       | 0                | 6.45.E+08          | 6.22.E+08          | 6.26.E+08          | 5.80.E+08          | 7.50.E+08              | 7.27.E+08              | 7.31.E+08              | 7.31.E+08              |
| 264 | P32322    | Pyroline-5-carboxylate reductase 1, mitochondrial [OS=Homo sapiens]                        | 176.6         | 63           | 14         | 519    | 13                | 9615                    | 578                             | 12                                           | 14                                       | 1                | 8.24.E+08          | 8.55.E+08          | 8.53.E+08          | 8.81.E+08          | 7.85.E+08              | 7.83.E+08              | 7.84.E+08              | 7.95.E+08              |
| 265 | P50454    | Serin H1 [OS=Homo sapiens]                                                                 | 176.4         | 51           | 15         | 730    | 15                | 13866                   | 1192                            | 15                                           | 15                                       | 0                | 7.30.E+08          | 8.07.E+08          | 7.78.E+08          | 7.97.E+08          | 8.69.E+08              | 7.63.E+08              | 7.43.E+08              | 7.55.E+08              |
| 266 | P49736    | DNA replication licensing factor mcm2 [OS=Homo sapiens]                                    | 176.2         | 27           | 18         | 811    | 18                | 12418                   | 1138                            | 18                                           | 18                                       | 0                | 9.36.E+08          | 9.50.E+08          | 9.23.E+08          | 9.30.E+08          | 1.08.E+09              | 1.08.E+09              | 1.09.E+09              | 1.09.E+09              |
| 267 | Q27J81    | Inverted formin-2 [OS=Homo sapiens]                                                        | 175.5         | 26           | 20         | 294    | 20                | 5503                    | 399                             | 20                                           | 20                                       | 0                | 2.36.E+08          | 2.52.E+08          | 2.34.E+08          | 2.41.E+08          | 2.57.E+08              | 2.58.E+08              | 2.08.E+08              | 2.37.E+08              |
| 268 | P62140    | Serine/threonine-protein phosphatase PP1-beta catalytic subunit [OS=Homo sapiens]          | 175.5         | 58           | 16         | 748    | 5                 | 13467                   | 1020                            | 15                                           | 15                                       | 0                | 1.60.E+08          | 1.53.E+08          | 1.49.E+08          | 1.41.E+08          | 1.41.E+08              | 1.48.E+08              | 1.37.E+08              | 1.30.E+08              |
| 269 | P22392-2  | Isoform 3 of Nucleoside diphosphate kinase B [OS=Homo sapiens]                             | 174.8         | 82           | 16         | 944    | 6                 |                         | 2297                            | 16                                           |                                          | 11               | 6.03.E+09          | 5.64.E+09          | 5.94.E+09          | 5.95.E+09          | 9.25.E+09              | 8.76.E+09              | 9.48.E+09              | 8.99.E+09              |
| 270 | P53618    | Coatamer subunit beta [OS=Homo sapiens]                                                    | 174.1         | 35           | 22         | 548    | 22                | 4753                    | 736                             | 21                                           | 21                                       | 0                | 7.53.E+08          | 7.80.E+08          | 7.44.E+08          | 7.60.E+08          | 1.00.E+09              | 9.96.E+08              | 8.79.E+08              | 9.72.E+08              |
| 271 | O43390-1  | heterogeneous nuclear ribonucleoprotein r [OS=Homo sapiens]                                | 173.3         | 35           | 20         | 1215   | 14                | 13212                   | 1323                            | 20                                           | 20                                       | 6                | 2.72.E+09          | 2.62.E+09          | 2.74.E+09          | 2.68.E+09          | 2.80.E+09              | 2.90.E+09              | 2.92.E+09              | 2.89.E+09              |
| 272 | O60664-1  | Perilipin-3 [OS=Homo sapiens]                                                              | 172.9         | 52           | 13         | 465    | 13                | 7646                    | 759                             | 13                                           | 12                                       | 0                | 4.27.E+08          | 4.19.E+08          | 4.06.E+08          | 4.45.E+08          | 4.76.E+08              | 4.38.E+08              | 4.32.E+08              | 4.41.E+08              |
| 273 | P45880    | Voltage-dependent anion-selective channel protein 2 [OS=Homo sapiens]                      | 171.8         | 68           | 13         | 959    | 13                | 16319                   | 1405                            | 12                                           | 13                                       | 0                | 1.94.E+09          | 2.01.E+09          | 2.07.E+09          | 1.91.E+09          | 1.50.E+09              | 1.56.E+09              | 1.62.E+09              | 1.61.E+09              |
| 274 | P33176    | Kinesin-1 heavy chain [OS=Homo sapiens]                                                    | 170.1         | 31           | 18         | 517    | 18                | 8658                    | 666                             | 18                                           | 18                                       | 0                | 3.95.E+08          | 3.08.E+08          | 3.84.E+08          | 3.24.E+08          | 3.79.E+08              | 3.61.E+08              | 3.64.E+08              | 3.89.E+08              |
| 275 | Q14980-1  | nuclear mitotic apparatus protein 1 [OS=Homo sapiens]                                      | 170.1         | 20           | 24         | 333    | 24                | 5105                    | 384                             | 24                                           | 23                                       | 0                | 3.03.E+08          | 3.39.E+08          | 2.82.E+08          | 2.98.E+08          | 4.15.E+08              | 3.54.E+08              | 3.98.E+08              | 4.12.E+08              |
| 276 | P23396-1  | 40S ribosomal protein S3 [OS=Homo sapiens]                                                 | 169.8         | 77           | 21         | 1481   | 21                | 14107                   | 1792                            | 21                                           | 21                                       | 0                | 4.87.E+09          | 4.74.E+09          | 4.80.E+09          | 4.56.E+09          | 4.23.E+09              | 4.29.E+09              | 4.47.E+09              | 4.18.E+09              |
| 277 | P31943    | Heterogeneous nuclear ribonucleoprotein H [OS=Homo sapiens]                                | 169.7         | 37           | 11         | 955    | 5                 | 17276                   | 1404                            | 11                                           | 10                                       | 4                | 1.36.E+09          | 1.33.E+09          | 1.39.E+09          | 1.35.E+09          | 1.62.E+09              | 1.62.E+09              | 1.54.E+09              | 1.64.E+09              |
| 278 | P15121    | aldose reductase [OS=Homo sapiens]                                                         | 168.0         | 75           | 16         | 687    | 15                | 4219                    | 670                             | 16                                           | 16                                       | 2                | 1.13.E+09          | 1.10.E+09          | 1.15.E+09          | 1.20.E+09          | 1.72.E+09              | 1.66.E+09              | 1.79.E+09              | 1.69.E+09              |

| No. | Accession | Description                                                               | Sum PEP Score | Coverage [%] | # Peptides | # PSMs | # Unique Peptides | Score Mascot: A5 Mascot | Score Sequest HT: A2 Sequest HT | # Peptides (by Search Engine): A2 Sequest HT | # Peptides (by Search Engine): A5 Mascot | # Razor Peptides | ctrl Abundance s_1 | ctrl Abundance s_2 | ctrl Abundance s_3 | ctrl Abundance s_4 | JAM-A KO Abundance s_1 | JAM-A KO Abundance s_2 | JAM-A KO Abundance s_3 | JAM-A KO Abundance s_4 |
|-----|-----------|---------------------------------------------------------------------------|---------------|--------------|------------|--------|-------------------|-------------------------|---------------------------------|----------------------------------------------|------------------------------------------|------------------|--------------------|--------------------|--------------------|--------------------|------------------------|------------------------|------------------------|------------------------|
| 279 | Q9NYL9    | tropomodulin-3 [OS=Homo sapiens]                                          | 165.2         | 61           | 14         | 568    | 14                | 8169                    | 833                             | 14                                           | 14                                       | 0                | 7.83.E+08          | 8.08.E+08          | 8.45.E+08          | 7.17.E+08          | 7.75.E+08              | 7.54.E+08              | 8.42.E+08              | 7.75.E+08              |
| 280 | Q5T4S7-1  | e3 ubiquitin-protein ligase UBR4 [OS=Homo sapiens]                        | 165.0         | 8            | 21         | 517    | 21                | 6668                    | 431                             | 21                                           | 20                                       | 0                | 2.14.E+09          | 2.36.E+09          | 2.26.E+09          | 2.44.E+09          | 2.97.E+09              | 2.69.E+09              | 2.56.E+09              | 3.13.E+09              |
| 281 | P18124    | 60S ribosomal protein L7 [OS=Homo sapiens]                                | 164.7         | 53           | 15         | 1355   | 15                | 11402                   | 1760                            | 15                                           | 14                                       | 0                | 3.24.E+09          | 3.16.E+09          | 3.34.E+09          | 3.27.E+09          | 2.63.E+09              | 2.57.E+09              | 2.60.E+09              | 2.59.E+09              |
| 282 | Q13310    | Polyadenylate-binding protein 4 [OS=Homo sapiens]                         | 164.6         | 29           | 14         | 641    | 6                 | 12121                   | 1033                            | 14                                           | 12                                       | 0                | 1.95.E+08          | 2.01.E+08          | 1.90.E+08          | 1.81.E+08          | 1.63.E+08              | 1.59.E+08              | 1.66.E+08              | 1.71.E+08              |
| 283 | O00764-1  | Pyridoxal kinase [OS=Homo sapiens]                                        | 163.9         | 55           | 10         | 639    | 10                | 14699                   | 888                             | 10                                           | 10                                       | 0                | 6.35.E+08          | 6.19.E+08          | 6.18.E+08          | 6.84.E+08          | 8.17.E+08              | 7.35.E+08              | 8.23.E+08              | 7.64.E+08              |
| 284 | P15531    | Nucleoside diphosphate kinase A [OS=Homo sapiens]                         | 163.4         | 91           | 12         | 1185   | 2                 | 11854                   | 1439                            | 12                                           | 12                                       | 1                | 2.11.E+08          | 2.11.E+08          | 1.85.E+08          | 2.53.E+08          | 1.64.E+08              | 1.66.E+08              | 1.97.E+08              | 1.72.E+08              |
| 285 | Q8TEX9-1  | Importin-4 [OS=Homo sapiens]                                              | 163.4         | 24           | 16         | 341    | 16                | 6438                    | 510                             | 16                                           | 16                                       | 0                | 2.11.E+08          | 2.46.E+08          | 2.13.E+08          | 2.38.E+08          | 2.32.E+08              | 2.10.E+08              | 1.99.E+08              | 2.03.E+08              |
| 286 | P17812    | CTP synthase 1 [OS=Homo sapiens]                                          | 161.8         | 40           | 18         | 704    | 18                | 8159                    | 917                             | 18                                           | 17                                       | 0                | 8.82.E+08          | 9.64.E+08          | 9.98.E+08          | 9.89.E+08          | 1.22.E+09              | 1.37.E+09              | 1.43.E+09              | 1.38.E+09              |
| 287 | Q92841    | Probable ATP-dependent RNA helicase DDX17 [OS=Homo sapiens]               | 161.4         | 37           | 22         | 875    | 17                | 7347                    | 1055                            | 22                                           | 22                                       | 4                | 2.11.E+09          | 2.13.E+09          | 2.17.E+09          | 2.02.E+09          | 2.27.E+09              | 2.34.E+09              | 2.28.E+09              | 2.33.E+09              |
| 288 | O14818-1  | Proteasome subunit alpha type-7 [OS=Homo sapiens]                         | 160.9         | 61           | 14         | 716    | 14                | 9115                    | 1085                            | 14                                           | 14                                       | 0                | 1.06.E+09          | 1.05.E+09          | 1.03.E+09          | 1.07.E+09          | 1.22.E+09              | 1.21.E+09              | 1.15.E+09              | 1.22.E+09              |
| 289 | P35232    | Prohibitin [OS=Homo sapiens]                                              | 159.4         | 79           | 15         | 1037   | 15                | 17805                   | 1610                            | 15                                           | 15                                       | 0                | 1.90.E+09          | 1.99.E+09          | 1.96.E+09          | 1.83.E+09          | 2.04.E+09              | 2.02.E+09              | 2.04.E+09              | 1.97.E+09              |
| 290 | P29692    | Elongation factor 1-delta [OS=Homo sapiens]                               | 159.3         | 76           | 14         | 561    | 14                | 13468                   | 935                             | 11                                           | 14                                       | 0                | 1.72.E+09          | 1.73.E+09          | 1.68.E+09          | 1.64.E+09          | 2.05.E+09              | 2.13.E+09              | 2.13.E+09              | 2.13.E+09              |
| 291 | P16615    | Sarcoplasmic/endoplasmic reticulum calcium ATPase 2 [OS=Homo sapiens]     | 159.1         | 21           | 15         | 434    | 15                | 4589                    | 550                             | 15                                           | 15                                       | 0                | 4.17.E+08          | 4.61.E+08          | 4.27.E+08          | 4.27.E+08          | 7.66.E+08              | 8.21.E+08              | 5.92.E+08              | 8.06.E+08              |
| 292 | Q99497    | protein DJ-1 [OS=Homo sapiens]                                            | 158.7         | 68           | 9          | 805    | 9                 | 14129                   | 1481                            | 9                                            | 9                                        | 0                | 1.47.E+09          | 1.37.E+09          | 1.46.E+09          | 1.60.E+09          | 1.74.E+09              | 1.67.E+09              | 1.77.E+09              | 1.72.E+09              |
| 293 | Q99613    | Eukaryotic translation initiation factor 3 subunit C [OS=Homo sapiens]    | 158.7         | 25           | 16         | 559    | 16                | 7045                    | 671                             | 16                                           | 16                                       | 0                | 7.22.E+08          | 7.27.E+08          | 7.21.E+08          | 6.64.E+08          | 5.64.E+08              | 6.08.E+08              | 5.62.E+08              | 5.66.E+08              |
| 294 | P05187    | alkaline phosphatase, placental type [OS=Homo sapiens]                    | 158.6         | 39           | 13         | 363    | 4                 | 4646                    | 553                             | 13                                           | 12                                       | 9                | 1.05.E+09          | 1.05.E+09          | 1.05.E+09          | 1.04.E+09          | 7.03.E+07              | 1.08.E+08              | 7.59.E+07              | 1.09.E+08              |
| 295 | Q01518-1  | adenyllyl cyclase-associated protein 1 [OS=Homo sapiens]                  | 157.8         | 39           | 15         | 1097   | 15                | 15431                   | 1475                            | 15                                           | 15                                       | 0                | 7.07.E+08          | 7.46.E+08          | 7.11.E+08          | 7.36.E+08          | 8.75.E+08              | 8.65.E+08              | 8.66.E+08              | 8.67.E+08              |
| 296 | Q15233    | Non-POU domain-containing octamer-binding protein [OS=Homo sapiens]       | 157.5         | 45           | 18         | 731    | 17                | 9189                    | 887                             | 18                                           | 18                                       | 0                | 1.10.E+09          | 1.00.E+09          | 1.03.E+09          | 1.07.E+09          | 8.29.E+08              | 8.93.E+08              | 9.38.E+08              | 7.31.E+08              |
| 297 | O95573    | long-chain-fatty-acid--CoA ligase 3 [OS=Homo sapiens]                     | 157.1         | 31           | 16         | 438    | 14                | 5774                    | 627                             | 16                                           | 16                                       | 2                | 8.55.E+08          | 8.88.E+08          | 8.20.E+08          | 8.36.E+08          | 1.17.E+09              | 1.04.E+09              | 8.17.E+08              | 1.14.E+09              |
| 298 | P01892    | HLA class I histocompatibility antigen, A-2 alpha chain [OS=Homo sapiens] | 156.1         | 51           | 12         | 573    | 5                 | 8584                    | 933                             | 12                                           | 12                                       | 7                | 9.18.E+08          | 9.47.E+08          | 9.18.E+08          | 9.17.E+08          | 9.47.E+08              | 9.65.E+08              | 1.01.E+09              | 9.43.E+08              |
| 299 | P05198    | Eukaryotic translation initiation factor 2 subunit 1 [OS=Homo sapiens]    | 155.9         | 53           | 13         | 625    | 13                | 9620                    | 971                             | 13                                           | 13                                       | 0                | 1.25.E+09          | 1.31.E+09          | 1.31.E+09          | 1.27.E+09          | 1.31.E+09              | 1.34.E+09              | 1.34.E+09              | 1.30.E+09              |
| 300 | P16152    | Carbonyl reductase [NADPH] 1 [OS=Homo sapiens]                            | 155.6         | 65           | 14         | 1002   | 11                | 16734                   | 1557                            | 14                                           | 14                                       | 3                | 1.63.E+09          | 1.65.E+09          | 1.76.E+09          | 1.61.E+09          | 2.28.E+09              | 2.27.E+09              | 2.19.E+09              | 2.37.E+09              |
| 301 | P09382    | Galectin-1 [OS=Homo sapiens]                                              | 155.5         | 81           | 8          | 1368   | 8                 | 27637                   | 1691                            | 7                                            | 8                                        | 0                | 2.59.E+09          | 2.65.E+09          | 2.64.E+09          | 2.43.E+09          | 3.54.E+09              | 3.78.E+09              | 3.84.E+09              | 3.75.E+09              |
| 302 | P55884    | Eukaryotic translation initiation factor 3 subunit B [OS=Homo sapiens]    | 155.0         | 29           | 16         | 566    | 16                | 6992                    | 833                             | 16                                           | 16                                       | 0                | 8.70.E+08          | 8.74.E+08          | 8.40.E+08          | 8.49.E+08          | 8.06.E+08              | 8.63.E+08              | 8.62.E+08              | 7.97.E+08              |
| 303 | P25398    | 40S ribosomal protein S12 [OS=Homo sapiens]                               | 154.2         | 75           | 10         | 1049   | 10                | 19753                   | 1162                            | 9                                            | 10                                       | 0                | 2.98.E+09          | 2.89.E+09          | 3.05.E+09          | 2.80.E+09          | 2.71.E+09              | 2.74.E+09              | 2.95.E+09              | 2.76.E+09              |
| 304 | Q9H4A4    | aminopeptidase B [OS=Homo sapiens]                                        | 153.8         | 47           | 17         | 538    | 17                | 6216                    | 742                             | 16                                           | 17                                       | 0                | 7.64.E+08          | 7.80.E+08          | 7.73.E+08          | 7.34.E+08          | 7.89.E+08              | 7.69.E+08              | 7.17.E+08              | 7.58.E+08              |
| 305 | Q92945    | Far upstream element-binding protein 2 [OS=Homo sapiens]                  | 153.8         | 34           | 19         | 484    | 17                | 7258                    | 594                             | 19                                           | 19                                       | 2                | 7.53.E+08          | 7.58.E+08          | 6.65.E+08          | 7.46.E+08          | 8.24.E+08              | 8.44.E+08              | 8.70.E+08              | 7.89.E+08              |
| 306 | O95336    | 6-phosphogluconolactonase [OS=Homo sapiens]                               | 153.0         | 81           | 12         | 478    | 12                | 4469                    | 694                             | 11                                           | 12                                       | 0                | 8.97.E+08          | 9.02.E+08          | 9.01.E+08          | 8.88.E+08          | 1.06.E+09              | 1.03.E+09              | 1.01.E+09              | 1.03.E+09              |
| 307 | P16402    | Histone H1.3 [OS=Homo sapiens]                                            | 152.5         | 30           | 12         | 937    | 2                 | 14962                   | 1129                            | 9                                            | 12                                       | 0                | 1.49.E+08          | 1.65.E+08          | 1.62.E+08          | 1.56.E+08          | 2.30.E+08              | 2.03.E+08              | 2.06.E+08              | 2.20.E+08              |
| 308 | P23526-1  | Adenosylhomocysteinase [OS=Homo sapiens]                                  | 151.9         | 46           | 17         | 1158   | 16                | 17902                   | 1568                            | 16                                           | 17                                       | 1                | 2.87.E+09          | 2.75.E+09          | 2.97.E+09          | 2.95.E+09          | 2.49.E+09              | 2.44.E+09              | 2.64.E+09              | 2.50.E+09              |
| 309 | Q14103    | heterogeneous nuclear ribonucleoprotein D0 [OS=Homo sapiens]              | 150.1         | 33           | 15         | 1071   | 12                | 8264                    | 990                             | 15                                           | 15                                       | 3                | 2.97.E+09          | 2.94.E+09          | 2.91.E+09          | 2.77.E+09          | 3.19.E+09              | 3.12.E+09              | 2.67.E+09              | 3.07.E+09              |
| 310 | Q9UL46    | proteasome activator complex subunit 2 [OS=Homo sapiens]                  | 150.1         | 58           | 11         | 781    | 11                | 13360                   | 983                             | 11                                           | 10                                       | 0                | 4.13.E+08          | 4.60.E+08          | 4.43.E+08          | 4.76.E+08          | 4.55.E+08              | 4.43.E+08              | 4.35.E+08              | 4.32.E+08              |
| 311 | P19971    | thymidine phosphorylase [OS=Homo sapiens]                                 | 150.0         | 37           | 13         | 585    | 13                | 9783                    | 874                             | 13                                           | 13                                       | 0                | 7.61.E+08          | 7.36.E+08          | 7.30.E+08          | 7.22.E+08          | 1.25.E+09              | 1.22.E+09              | 1.20.E+09              | 1.20.E+09              |
| 312 | Q15393-1  | Splicing factor 3B subunit 3 [OS=Homo sapiens]                            | 150.0         | 23           | 16         | 536    | 16                | 6980                    | 771                             | 15                                           | 16                                       | 0                | 7.12.E+08          | 6.80.E+08          | 7.29.E+08          | 6.96.E+08          | 6.44.E+08              | 6.24.E+08              | 6.69.E+08              | 6.48.E+08              |
| 313 | P30044-1  | Peroxiredoxin-5, mitochondrial [OS=Homo sapiens]                          | 149.5         | 56           | 12         | 1152   | 12                | 12119                   | 1475                            | 12                                           | 12                                       | 0                | 1.64.E+09          | 1.79.E+09          | 1.97.E+09          | 1.53.E+09          | 1.69.E+09              | 1.53.E+09              | 1.70.E+09              | 1.68.E+09              |
| 314 | P52788-1  | Spermine synthase [OS=Homo sapiens]                                       | 149.0         | 60           | 14         | 338    | 14                | 4478                    | 467                             | 14                                           | 14                                       | 0                | 4.42.E+08          | 4.53.E+08          | 4.11.E+08          | 4.47.E+08          | 5.46.E+08              | 5.57.E+08              | 5.05.E+08              | 5.33.E+08              |
| 315 | P00352    | Retinal dehydrogenase 1 [OS=Homo sapiens]                                 | 148.4         | 54           | 18         | 361    | 16                | 2793                    | 461                             | 18                                           | 16                                       | 2                | 1.83.E+09          | 1.82.E+09          | 1.79.E+09          | 1.48.E+09          | 1.99.E+09              | 2.17.E+09              | 1.95.E+09              | 2.11.E+09              |
| 316 | Q9P2J5    | Leucine--tRNA ligase, cytoplasmic [OS=Homo sapiens]                       | 148.3         | 22           | 17         | 589    | 17                | 6704                    | 583                             | 17                                           | 17                                       | 0                | 3.79.E+08          | 4.12.E+08          | 3.44.E+08          | 3.83.E+08          | 4.34.E+08              | 4.37.E+08              | 3.50.E+08              | 4.19.E+08              |
| 317 | Q9NY33    | dipeptidyl peptidase 3 [OS=Homo sapiens]                                  | 148.2         | 38           | 14         | 321    | 14                | 5276                    | 465                             | 14                                           | 14                                       | 0                | 6.46.E+08          | 6.14.E+08          | 7.68.E+08          | 6.62.E+08          | 7.52.E+08              | 8.24.E+08              | 1.04.E+09              | 3.23.E+08              |
| 318 | P61221    | ATP-binding cassette sub-family E member 1 [OS=Homo sapiens]              | 147.9         | 42           | 18         | 569    | 18                | 7513                    | 789                             | 18                                           | 17                                       | 0                | 8.59.E+08          | 8.72.E+08          | 8.66.E+08          | 8.43.E+08          | 9.91.E+08              | 9.04.E+08              | 9.40.E+08              | 9.33.E+08              |
| 319 | P32969    | 60S ribosomal protein L9 [OS=Homo sapiens]                                | 147.7         | 66           | 12         | 885    | 12                | 10664                   | 1395                            | 12                                           | 12                                       | 0                | 1.83.E+09          | 1.78.E+09          | 1.84.E+09          | 2.04.E+09          | 1.70.E+09              | 1.64.E+09              | 1.63.E+09              | 1.65.E+09              |
| 320 | P61247    | 40S ribosomal protein S3a [OS=Homo sapiens]                               | 147.5         | 56           | 16         | 853    | 16                | 13134                   | 1051                            | 16                                           | 16                                       | 0                | 3.59.E+09          | 3.57.E+09          | 3.57.E+09          | 3.36.E+09          | 2.99.E+09              | 2.99.E+09              | 3.20.E+09              | 2.98.E+09              |
| 321 | Q96QK1    | Vacuolar protein sorting-associated protein 35 [OS=Homo sapiens]          | 147.3         | 28           | 16         | 476    | 16                | 5943                    | 560                             | 15                                           | 16                                       | 0                | 4.62.E+08          | 4.65.E+08          | 4.33.E+08          | 4.43.E+08          | 6.67.E+08              | 6.48.E+08              | 6.31.E+08              | 6.31.E+08              |
| 322 | P21796    | voltage-dependent anion-selective channel protein 1 [OS=Homo sapiens]     | 147.0         | 66           | 13         | 848    | 12                | 13656                   | 1121                            | 13                                           | 13                                       | 1                | 2.38.E+09          | 2.36.E+09          | 2.32.E+09          | 2.26.E+09          | 1.76.E+09              | 1.84.E+09              | 1.90.E+09              | 1.86.E+09              |
| 323 | P30086    | phosphatidylethanolamine-binding protein 1 [OS=Homo sapiens]              | 146.4         | 76           | 10         | 662    | 10                | 14966                   | 1300                            | 10                                           | 10                                       | 0                | 1.18.E+09          | 1.25.E+09          | 1.21.E+09          | 1.16.E+09          | 1.23.E+09              | 1.32.E+09              | 1.20.E+09              | 1.28.E+09              |
| 324 | P61158    | actin-related protein 3 [OS=Homo sapiens]                                 | 146.1         | 57           | 13         | 509    | 13                | 7686                    | 804                             | 12                                           | 13                                       | 0                | 5.78.E+08          | 6.01.E+08          | 5.36.E+08          | 5.98.E+08          | 6.80.E+08              | 6.72.E+08              | 5.74.E+08              | 6.05.E+08              |
| 325 | P42330    | Aldo-keto reductase family 1 member C3 [OS=Homo sapiens]                  | 146.1         | 58           | 17         | 792    | 7                 | 6983                    | 1007                            | 17                                           | 16                                       | 0                | 1.40.E+08          | 1.78.E+08          | 1.42.E+08          | 1.58.E+08          | 4.14.E+08              | 4.36.E+08              | 3.90.E+08              | 4.01.E+08              |
| 326 | P24534    | Elongation factor 1-beta [OS=Homo sapiens]                                | 146.1         | 79           | 9          | 632    | 9                 | 13748                   | 1333                            | 8                                            | 9                                        | 0                | 2.16.E+09          | 2.24.E+09          | 1.94.E+09          | 2.10.E+09          | 2.08.E+09              | 2.13.E+09              | 1.83.E+09              | 2.18.E+09              |
| 327 | O00410    | Importin-5 [OS=Homo sapiens]                                              | 145.5         | 29           | 18         | 405    | 18                | 5882                    | 515                             | 17                                           | 18                                       | 0                | 3.30.E+08          | 3.12.E+08          | 3.31.E+08          | 3.18.E+08          | 4.39.E+08              | 3.94.E+08              | 4.12.E+08              | 4.44.E+08              |
| 328 | P40939    | Trifunctional enzyme subunit alpha, mitochondrial [OS=Homo sapiens]       | 145.4         | 34           | 19         | 477    | 19                | 6439                    | 629                             | 19                                           | 19                                       | 0                | 6.53.E+08          | 6.67.E+08          | 6.60.E+08          | 6.30.E+08          | 8.00.E+08              | 6.54.E+08              | 7.02.E+08              | 7.00.E+08              |
| 329 | P43686    | 26S proteasome regulatory subunit 6B [OS=Homo sapiens]                    | 145.1         | 52           | 13         | 496    | 13                | 5903                    | 581                             | 13                                           | 13                                       | 0                | 4.06.E+08          | 4.14.E+08          | 3.98.E+08          | 3.92.E+08          | 4.30.E+08              | 4.21.E+08              | 3.83.E+08              | 3.83.E+08              |
| 330 | Q9Y262    | eukaryotic translation initiation factor 3 subunit L [OS=Homo sapiens]    | 144.7         | 34           | 17         | 719    | 17                | 9604                    | 777                             | 17                                           | 17                                       | 0                | 5.02.E+08          | 5.39.E+08          | 5.06.E+08          | 5.05.E+08          | 5.17.E+08              | 5.34.E+08              | 5.23.E+08              | 5.06.E+08              |
| 331 | P62081    | 40S ribosomal protein S7 [OS=Homo sapiens]                                | 144.7         | 57           | 11         | 1115   | 11                | 13415                   | 1576                            | 11                                           | 11                                       | 0                | 2.33.E+09          | 2.34.E+09          | 2.23.E+09          | 2.54.E+09          | 2.20.E+09              | 2.19.E+09              | 2.11.E+09              | 2.24.E+09              |
| 332 | Q96HC4    | PDZ and LIM domain protein 5 [OS=Homo sapiens]                            | 143.6         | 39           | 17         | 490    | 17                | 3766                    | 480                             | 16                                           | 17                                       | 0                | 5.06.E+08          | 4.84.E+08          | 4.86.E+08          | 5.06.E+0           |                        |                        |                        |                        |

| No. | Accession | Description                                                                                      | Sum PEP Score | Coverage [%] | # Peptides | # PSMs | # Unique Peptides | Score Mascot: A5 Mascot | Score Sequest HT: A2 Sequest HT | # Peptides (by Search Engine): A2 Sequest HT | # Peptides (by Search Engine): A5 Mascot | # Razor Peptides | ctrl Abundance_s_1 | ctrl Abundance_s_2 | ctrl Abundance_s_3 | ctrl Abundance_s_4 | JAM-A KO Abundance_s_1 | JAM-A KO Abundance_s_2 | JAM-A KO Abundance_s_3 | JAM-A KO Abundance_s_4 |
|-----|-----------|--------------------------------------------------------------------------------------------------|---------------|--------------|------------|--------|-------------------|-------------------------|---------------------------------|----------------------------------------------|------------------------------------------|------------------|--------------------|--------------------|--------------------|--------------------|------------------------|------------------------|------------------------|------------------------|
| 333 | P17858-1  | ATP-dependent 6-phosphofructokinase, liver type [OS=Homo sapiens]                                | 143.0         | 29           | 12         | 307    | 10                | 4882                    | 419                             | 12                                           | 12                                       | 0                | 1.93.E+08          | 2.12.E+08          | 2.06.E+08          | 1.99.E+08          | 2.07.E+08              | 2.07.E+08              | 1.87.E+08              | 2.17.E+08              |
| 334 | P14868    | Aspartate--tRNA ligase, cytoplasmic [OS=Homo sapiens]                                            | 142.9         | 50           | 21         | 607    | 21                | 4598                    | 633                             | 21                                           | 21                                       | 0                | 1.17.E+09          | 1.14.E+09          | 1.19.E+09          | 1.13.E+09          | 1.24.E+09              | 1.27.E+09              | 1.39.E+09              | 1.26.E+09              |
| 335 | O00299    | chloride intracellular channel protein 1 [OS=Homo sapiens]                                       | 142.1         | 84           | 16         | 741    | 15                | 12395                   | 1059                            | 15                                           | 15                                       | 1                | 1.09.E+09          | 1.08.E+09          | 1.14.E+09          | 1.27.E+09          | 1.22.E+09              | 1.25.E+09              | 1.17.E+09              | 1.25.E+09              |
| 336 | P62328    | Thymosin beta-4 [OS=Homo sapiens]                                                                | 141.2         | 89           | 9          | 825    | 9                 | 9198                    | 991                             | 7                                            | 9                                        | 0                | 1.95.E+09          | 1.84.E+09          | 1.95.E+09          | 1.99.E+09          | 2.35.E+09              | 2.37.E+09              | 2.62.E+09              | 2.60.E+09              |
| 337 | P38919    | Eukaryotic initiation factor 4A-III [OS=Homo sapiens]                                            | 140.9         | 39           | 13         | 826    | 10                | 15177                   | 1266                            | 12                                           | 13                                       | 0                | 7.54.E+08          | 8.24.E+08          | 6.76.E+08          | 7.80.E+08          | 8.67.E+08              | 8.46.E+08              | 8.73.E+08              | 7.27.E+08              |
| 338 | P63010-1  | AP-2 complex subunit beta [OS=Homo sapiens]                                                      | 140.9         | 23           | 20         | 457    | 10                | 5944                    | 509                             | 20                                           | 19                                       | 10               | 5.64.E+08          | 4.89.E+08          | 5.23.E+08          | 5.50.E+08          | 6.62.E+08              | 6.04.E+08              | 6.35.E+08              | 5.99.E+08              |
| 339 | P11388-1  | DNA topoisomerase 2-alpha [OS=Homo sapiens]                                                      | 140.1         | 14           | 18         | 401    | 18                | 4143                    | 439                             | 18                                           | 18                                       | 0                | 4.68.E+08          | 4.71.E+08          | 4.50.E+08          | 4.47.E+08          | 7.60.E+08              | 7.73.E+08              | 7.73.E+08              | 7.86.E+08              |
| 340 | P17174    | Aspartate aminotransferase, cytoplasmic [OS=Homo sapiens]                                        | 138.4         | 57           | 13         | 686    | 13                | 9911                    | 836                             | 12                                           | 13                                       | 0                | 6.36.E+08          | 7.51.E+08          | 7.35.E+08          | 7.75.E+08          | 7.80.E+08              | 7.89.E+08              | 7.53.E+08              | 7.68.E+08              |
| 341 | P31949    | protein S100-A11 [OS=Homo sapiens]                                                               | 138.3         | 87           | 7          | 1406   | 7                 | 26215                   | 1945                            | 7                                            | 7                                        | 0                | 2.57.E+09          | 2.61.E+09          | 2.29.E+09          | 2.59.E+09          | 2.12.E+09              | 2.06.E+09              | 1.86.E+09              | 2.08.E+09              |
| 342 | P04632    | Calpain small subunit 1 [OS=Homo sapiens]                                                        | 138.0         | 56           | 12         | 602    | 12                | 9133                    | 722                             | 12                                           | 10                                       | 0                | 5.75.E+08          | 5.67.E+08          | 5.59.E+08          | 6.07.E+08          | 5.57.E+08              | 5.20.E+08              | 5.57.E+08              | 5.47.E+08              |
| 343 | P37837    | Transaldolase [OS=Homo sapiens]                                                                  | 137.8         | 51           | 16         | 861    | 16                | 7871                    | 768                             | 16                                           | 15                                       | 0                | 1.91.E+09          | 1.88.E+09          | 1.91.E+09          | 1.98.E+09          | 2.34.E+09              | 2.24.E+09              | 2.34.E+09              | 2.31.E+09              |
| 344 | P10696    | Alkaline phosphatase, placental-like [OS=Homo sapiens]                                           | 137.7         | 33           | 11         | 357    | 2                 | 4474                    | 541                             | 11                                           | 11                                       | 0                | 3.85.E+07          | 3.62.E+07          | 4.21.E+07          | 3.39.E+07          | 3.18.E+06              | 3.40.E+06              | 4.22.E+06              | 3.66.E+06              |
| 345 | P13804-1  | Electron transfer flavoprotein subunit alpha, mitochondrial [OS=Homo sapiens]                    | 137.1         | 60           | 13         | 617    | 13                | 10297                   | 910                             | 13                                           | 13                                       | 0                | 6.15.E+08          | 6.52.E+08          | 6.04.E+08          | 5.75.E+08          | 5.61.E+08              | 5.55.E+08              | 5.49.E+08              | 5.43.E+08              |
| 346 | P39687    | Acidic leucine-rich nuclear phosphoprotein 32 family member A [OS=Homo sapiens]                  | 136.1         | 45           | 10         | 787    | 5                 | 18706                   | 1184                            | 10                                           | 10                                       | 0                | 1.40.E+09          | 1.37.E+09          | 1.34.E+09          | 1.35.E+09          | 1.36.E+09              | 1.30.E+09              | 1.37.E+09              | 1.32.E+09              |
| 347 | Q08945    | FACT complex subunit SSRP1 [OS=Homo sapiens]                                                     | 136.0         | 38           | 21         | 416    | 21                | 4050                    | 410                             | 20                                           | 21                                       | 0                | 9.09.E+08          | 8.61.E+08          | 9.30.E+08          | 8.62.E+08          | 9.18.E+08              | 9.24.E+08              | 8.44.E+08              | 9.68.E+08              |
| 348 | P40925    | Malate dehydrogenase, cytoplasmic [OS=Homo sapiens]                                              | 136.0         | 48           | 12         | 851    | 12                | 14919                   | 1240                            | 12                                           | 12                                       | 0                | 1.54.E+09          | 1.58.E+09          | 1.55.E+09          | 1.58.E+09          | 2.15.E+09              | 2.13.E+09              | 2.13.E+09              | 2.17.E+09              |
| 349 | Q14240-1  | eukaryotic initiation factor 4A-II [OS=Homo sapiens]                                             | 135.9         | 33           | 14         | 1314   | 2                 | 23730                   | 1705                            | 14                                           | 14                                       | 0                | 3.43.E+07          | 3.32.E+07          | 3.55.E+07          | 4.41.E+07          | 6.53.E+07              | 5.90.E+07              | 6.09.E+07              | 5.67.E+07              |
| 350 | P49748-1  | Very long-chain specific acyl-CoA dehydrogenase, mitochondrial [OS=Homo sapiens]                 | 135.5         | 36           | 14         | 346    | 14                | 5139                    | 490                             | 14                                           | 14                                       | 0                | 5.23.E+08          | 5.40.E+08          | 5.33.E+08          | 4.96.E+08          | 4.01.E+08              | 4.27.E+08              | 3.90.E+08              | 4.08.E+08              |
| 351 | P09493-5  | Isoform 5 of Tropomyosin alpha-1 chain [OS=Homo sapiens]                                         | 135.2         | 38           | 12         | 473    | 1                 |                         | 1321                            | 12                                           |                                          | 0                | 1.41.E+07          | 1.26.E+07          | 1.39.E+07          | 1.58.E+07          | 1.15.E+07              | 1.20.E+07              | 1.46.E+07              | 1.29.E+07              |
| 352 | Q96DG6    | Carboxymethylglutamate homology [OS=Homo sapiens]                                                | 134.8         | 58           | 14         | 583    | 14                | 8123                    | 562                             | 13                                           | 12                                       | 0                | 6.53.E+08          | 6.78.E+08          | 6.68.E+08          | 6.78.E+08          | 5.98.E+08              | 5.88.E+08              | 6.34.E+08              | 5.92.E+08              |
| 353 | P31150    | Rab GDP dissociation inhibitor alpha [OS=Homo sapiens]                                           | 134.6         | 28           | 8          | 506    | 2                 | 12220                   | 945                             | 8                                            | 8                                        | 0                | 3.76.E+07          | 4.39.E+07          | 3.78.E+07          | 3.95.E+07          | 4.85.E+07              | 4.92.E+07              | 4.64.E+07              | 5.56.E+07              |
| 354 | Q13162    | Peroxiredoxin-4 [OS=Homo sapiens]                                                                | 133.9         | 60           | 12         | 866    | 9                 | 8885                    | 1079                            | 12                                           | 12                                       | 0                | 5.31.E+08          | 4.95.E+08          | 5.07.E+08          | 4.76.E+08          | 7.36.E+08              | 7.41.E+08              | 7.38.E+08              | 6.93.E+08              |
| 355 | P22087    | rRNA 2'-O-methyltransferase fibrillar [OS=Homo sapiens]                                          | 133.4         | 44           | 13         | 431    | 13                | 3993                    | 586                             | 13                                           | 12                                       | 0                | 1.09.E+09          | 1.01.E+09          | 1.10.E+09          | 1.04.E+09          | 7.51.E+08              | 7.33.E+08              | 7.65.E+08              | 7.44.E+08              |
| 356 | Q99798    | Aconitate hydratase, mitochondrial [OS=Homo sapiens]                                             | 133.3         | 30           | 14         | 349    | 14                | 4845                    | 475                             | 14                                           | 14                                       | 0                | 3.41.E+08          | 3.27.E+08          | 3.51.E+08          | 3.26.E+08          | 3.69.E+08              | 3.73.E+08              | 3.62.E+08              | 4.64.E+08              |
| 357 | Q16822    | Phosphoenolpyruvate carboxykinase [GTP], mitochondrial OS=Homo sapiens OX=9606 GN=PCK2 PE=1 SV=4 | 133.3         | 41           | 18         | 196    | 18                | 5469                    |                                 |                                              | 18                                       | 0                | 5.93.E+08          | 6.05.E+08          | 6.05.E+08          | 6.19.E+08          | 6.19.E+08              | 6.25.E+08              | 5.70.E+08              | 5.99.E+08              |
| 358 | P07910-1  | Heterogeneous nuclear ribonucleoproteins C1/C2 [OS=Homo sapiens]                                 | 133.2         | 39           | 14         | 1133   | 1                 | 13117                   | 1339                            | 14                                           | 13                                       | 0                | 1.18.E+07          | 2.63.E+07          | 1.53.E+07          | 1.81.E+07          | 2.96.E+07              | 2.45.E+07              |                        | 2.97.E+07              |
| 359 | P61586    | Transforming protein RhoA [OS=Homo sapiens]                                                      | 133.1         | 69           | 10         | 851    | 2                 | 15454                   | 1293                            | 10                                           | 10                                       | 8                | 1.47.E+09          | 1.46.E+09          | 1.52.E+09          | 1.43.E+09          | 1.14.E+09              | 1.17.E+09              | 1.16.E+09              | 1.12.E+09              |
| 360 | P62158    | Calmodulin [OS=Homo sapiens]                                                                     | 133.0         | 85           | 9          | 587    | 9                 | 14323                   | 657                             | 7                                            | 9                                        | 0                | 1.36.E+09          | 1.35.E+09          | 1.40.E+09          | 1.35.E+09          | 1.58.E+09              | 1.60.E+09              | 1.61.E+09              | 1.85.E+09              |
| 361 | P12236    | ADP/ATP translocase 3 [OS=Homo sapiens]                                                          | 132.7         | 55           | 19         | 894    | 4                 | 10785                   | 973                             | 18                                           | 17                                       | 13               | 2.99.E+09          | 2.91.E+09          | 2.70.E+09          | 3.06.E+09          | 2.58.E+09              | 2.83.E+09              | 2.71.E+09              | 2.85.E+09              |
| 362 | P42167    | Lamina-associated polypeptide 2, isoforms beta/gamma [OS=Homo sapiens]                           | 132.3         | 38           | 10         | 521    | 5                 | 8067                    | 721                             | 10                                           | 10                                       | 6                | 6.17.E+08          | 5.33.E+08          | 6.12.E+08          | 6.26.E+08          | 7.76.E+08              | 7.00.E+08              | 7.08.E+08              | 7.47.E+08              |
| 363 | Q9UHD8-1  | Septin-9 [OS=Homo sapiens]                                                                       | 132.2         | 34           | 14         | 593    | 14                | 6934                    | 772                             | 14                                           | 14                                       | 0                | 6.57.E+08          | 6.48.E+08          | 6.79.E+08          | 6.88.E+08          | 5.17.E+08              | 5.11.E+08              | 5.10.E+08              | 4.96.E+08              |
| 364 | Q9UNM6    | 26S proteasome non-ATPase regulatory subunit 13 [OS=Homo sapiens]                                | 132.2         | 48           | 15         | 373    | 15                | 3924                    | 396                             | 15                                           | 15                                       | 0                | 5.92.E+08          | 6.00.E+08          | 6.05.E+08          | 5.80.E+08          | 6.64.E+08              | 6.80.E+08              | 7.12.E+08              | 6.85.E+08              |
| 365 | P49321    | Nuclear autoantigenic sperm protein [OS=Homo sapiens]                                            | 131.9         | 28           | 12         | 326    | 12                | 6044                    | 523                             | 11                                           | 12                                       | 0                | 5.32.E+08          | 5.35.E+08          | 5.52.E+08          | 5.15.E+08          | 7.69.E+08              | 6.81.E+08              | 6.84.E+08              | 7.67.E+08              |
| 366 | Q15019    | septin-2 [OS=Homo sapiens]                                                                       | 131.8         | 60           | 13         | 496    | 13                | 6718                    | 688                             | 13                                           | 13                                       | 0                | 6.97.E+08          | 7.07.E+08          | 6.49.E+08          | 7.21.E+08          | 8.27.E+08              | 9.06.E+08              | 6.88.E+08              | 8.39.E+08              |
| 367 | O94925-3  | Isoform 3 of Glutaminase kidney isoform, mitochondrial [OS=Homo sapiens]                         | 130.9         | 37           | 14         | 236    | 14                |                         | 613                             | 14                                           |                                          | 0                | 3.59.E+08          | 3.27.E+08          | 3.40.E+08          | 3.50.E+08          | 4.28.E+08              | 4.14.E+08              | 3.64.E+08              | 3.76.E+08              |
| 368 | Q15029    | 116 kDa U5 small nuclear ribonucleoprotein component [OS=Homo sapiens]                           | 130.8         | 25           | 16         | 535    | 15                | 5532                    | 553                             | 16                                           | 15                                       | 0                | 5.93.E+08          | 6.80.E+08          | 5.77.E+08          | 5.79.E+08          | 5.38.E+08              | 5.25.E+08              | 5.39.E+08              | 6.05.E+08              |
| 369 | P46777    | 60S ribosomal protein L5 [OS=Homo sapiens]                                                       | 130.7         | 53           | 13         | 762    | 13                | 10251                   | 1008                            | 13                                           | 13                                       | 0                | 1.48.E+09          | 1.45.E+09          | 1.39.E+09          | 1.58.E+09          | 1.27.E+09              | 1.32.E+09              | 1.26.E+09              | 1.29.E+09              |
| 370 | Q16576-1  | Histone-binding protein RBBP7 [OS=Homo sapiens]                                                  | 130.3         | 73           | 15         | 428    | 11                | 4802                    | 460                             | 14                                           | 15                                       | 4                | 1.86.E+09          | 2.04.E+09          | 1.95.E+09          | 1.86.E+09          | 1.58.E+09              | 1.79.E+09              | 1.68.E+09              | 1.57.E+09              |
| 371 | O75390    | citrate synthase, mitochondrial [OS=Homo sapiens]                                                | 129.5         | 48           | 14         | 829    | 14                | 10588                   | 984                             | 14                                           | 14                                       | 0                | 1.35.E+09          | 1.37.E+09          | 1.34.E+09          | 1.31.E+09          | 1.17.E+09              | 1.17.E+09              | 1.16.E+09              | 1.20.E+09              |
| 372 | P23588    | eukaryotic translation initiation factor 4B [OS=Homo sapiens]                                    | 129.5         | 34           | 16         | 644    | 16                | 6834                    | 809                             | 16                                           | 16                                       | 0                | 6.98.E+08          | 6.71.E+08          | 7.45.E+08          | 7.73.E+08          | 5.68.E+08              | 5.19.E+08              | 5.55.E+08              | 5.28.E+08              |
| 373 | P11387    | DNA topoisomerase 1 [OS=Homo sapiens]                                                            | 129.0         | 28           | 15         | 311    | 15                | 3070                    | 442                             | 14                                           | 15                                       | 0                | 9.96.E+08          | 1.00.E+09          | 9.92.E+08          | 9.87.E+08          | 8.55.E+08              | 8.03.E+08              | 8.98.E+08              | 8.12.E+08              |
| 374 | Q9NZL4    | Hsp70-binding protein 1 OS=Homo sapiens OX=9606 GN=HSPBP1 PE=1 SV=2                              | 128.9         | 62           | 13         | 127    | 13                | 4035                    |                                 |                                              | 13                                       | 0                | 5.79.E+08          | 6.81.E+08          | 6.75.E+08          | 6.32.E+08          | 4.80.E+08              | 5.08.E+08              | 4.59.E+08              | 4.61.E+08              |
| 375 | Q02790    | Peptidyl-prolyl cis-trans isomerase FKBP4 [OS=Homo sapiens]                                      | 128.7         | 46           | 16         | 367    | 16                | 4212                    | 528                             | 15                                           | 16                                       | 0                | 7.62.E+08          | 7.56.E+08          | 7.49.E+08          | 7.52.E+08          | 5.91.E+08              | 6.38.E+08              | 5.89.E+08              | 5.67.E+08              |
| 376 | P00505    | Aspartate aminotransferase, mitochondrial [OS=Homo sapiens]                                      | 128.2         | 43           | 12         | 436    | 12                | 6364                    | 766                             | 12                                           | 12                                       | 0                | 7.37.E+08          | 7.23.E+08          | 7.77.E+08          | 7.49.E+08          | 7.70.E+08              | 7.39.E+08              | 7.87.E+08              | 7.39.E+08              |
| 377 | P21291    | Cysteine and glycine-rich protein 1 [OS=Homo sapiens]                                            | 128.1         | 59           | 7          | 407    | 7                 | 8215                    | 706                             | 7                                            | 7                                        | 0                | 5.44.E+08          | 5.68.E+08          | 5.68.E+08          | 5.51.E+08          | 8.98.E+08              | 9.17.E+08              | 9.45.E+08              | 9.16.E+08              |
| 378 | P60953    | Cell division control protein 42 homolog [OS=Homo sapiens]                                       | 128.0         | 63           | 9          | 1094   | 8                 | 14655                   | 1551                            | 9                                            | 9                                        | 1                | 1.16.E+09          | 1.20.E+09          | 1.03.E+09          | 1.31.E+09          | 1.21.E+09              | 1.29.E+09              | 1.16.E+09              | 1.25.E+09              |
| 379 | Q07021    | Complement component 1 Q subcomponent-binding protein, mitochondrial [OS=Homo sapiens]           | 127.9         | 48           | 7          | 618    | 7                 | 14596                   | 1335                            | 7                                            | 7                                        | 0                | 1.03.E+09          | 1.03.E+09          | 9.69.E+08          | 1.03.E+09          | 8.23.E+08              | 8.09.E+08              | 5.90.E+08              | 7.11.E+08              |
| 380 | Q92499    | ATP-dependent RNA helicase DDX1 [OS=Homo sapiens]                                                | 127.7         | 22           | 13         | 626    | 13                | 6765                    | 704                             | 13                                           | 13                                       | 0                | 4.26.E+08          | 4.39.E+08          | 4.28.E+08          | 4.52.E+08          | 5.00.E+08              | 4.64.E+08              | 3.83.E+08              | 4.71.E+08              |
| 381 | P62906    | 60S ribosomal protein L10A [OS=Homo sapiens]                                                     | 127.5         | 47           | 10         | 835    | 10                | 7088                    | 1052                            | 10                                           | 10                                       | 0                | 2.46.E+09          | 2.35.E+09          | 2.53.E+09          | 2.32.E+09          | 2.12.E+09              | 2.12.E+09              | 2.35.E+09              | 2.16.E+09              |
| 382 | Q9Y5B9    | FACT complex subunit SPT16 [OS=Homo sapiens]                                                     | 127.1         | 23           | 17         | 287    | 17                | 3176                    | 299                             | 16                                           | 16                                       | 0                | 4.68.E+08          | 4.93.E+08          | 4.44.E+08          | 4.39.E+08          | 4.77.E+08              | 4.19.E+08              | 4.22.E+08              | 5.02.E+08              |
| 383 | Q00796    | Sorbitol dehydrogenase [OS=Homo sapiens]                                                         | 127.0         | 52           | 13         | 372    | 13                | 5820                    | 416                             | 12                                           | 13                                       | 0                | 6.00.E+08          | 5.68.E+08          | 5.73.E+08          | 5.79.E+08          | 7.82.E+08              | 7.70.E+08              | 7.70.E+08              | 7.87.E+08              |
| 384 | P12235    | ADP/ATP translocase 1 [OS=Homo sapiens]                                                          | 126.8         | 48           | 16         | 771    | 4                 | 10810                   | 866                             | 14                                           | 16                                       | 0                | 9.83.E+07          | 6.32.E+07          | 8.02.E+07          | 1.35.E+08          | 1.32.E+08              | 1.32.E+08              | 9.92.E+07              | 1.16.E+08              |
| 385 | O00148    | ATP-dependent RNA helicase DDX39A [OS=Homo sapiens]                                              | 126.5         | 41           | 14         | 944    | 5                 | 10489                   | 1089                            | 14                                           | 14                                       | 0                | 1.50.E+08          | 1.12.E+08          | 1.49.E+08          | 1.63.E+08          | 1.65.E+08              | 1.70.E+08              | 1.05.E+08              | 1.63.E+08              |
| 386 | P48163    | NADP-dependent malic enzyme [OS=Homo sapiens]                                                    | 126.5         | 42           | 14         | 460    | 14                | 7888                    | 582                             | 14                                           | 14                                       | 0                | 2.24.E+08          | 2.54.E+08          | 2.22.E+08          | 2.                 |                        |                        |                        |                        |

| No. | Accession | Description                                                                 | Sum PEP Score | Coverage [%] | # Peptides | # PSMs | # Unique Peptides | Score Mascot: A5 Mascot | Score Sequest HT: A2 Sequest HT | # Peptides (by Search Engine): A2 Sequest HT | # Peptides (by Search Engine): A5 Mascot | # Razor Peptides | ctrl Abundance_s_1 | ctrl Abundance_s_2 | ctrl Abundance_s_3 | ctrl Abundance_s_4 | JAM-A KO Abundance_s_1 | JAM-A KO Abundance_s_2 | JAM-A KO Abundance_s_3 | JAM-A KO Abundance_s_4 |
|-----|-----------|-----------------------------------------------------------------------------|---------------|--------------|------------|--------|-------------------|-------------------------|---------------------------------|----------------------------------------------|------------------------------------------|------------------|--------------------|--------------------|--------------------|--------------------|------------------------|------------------------|------------------------|------------------------|
| 387 | O43143    | Pre-mRNA-splicing factor ATP-dependent RNA helicase DHX15 [OS=Homo sapiens] | 126.5         | 27           | 15         | 490    | 15                | 5758                    | 646                             | 15                                           | 15                                       | 0                | 7.59.E+08          | 7.08.E+08          | 7.46.E+08          | 7.02.E+08          | 7.60.E+08              | 7.12.E+08              | 7.75.E+08              | 7.40.E+08              |
| 388 | Q6PIU2    | Neutral cholesterol ester hydrolase 1 [OS=Homo sapiens]                     | 126.5         | 40           | 12         | 350    | 12                | 4105                    | 434                             | 12                                           | 12                                       | 0                | 3.89.E+08          | 4.13.E+08          | 3.73.E+08          | 3.90.E+08          | 4.95.E+08              | 4.75.E+08              | 4.53.E+08              | 4.90.E+08              |
| 389 | P62241    | 40S ribosomal protein S8 [OS=Homo sapiens]                                  | 125.5         | 59           | 13         | 1080   | 13                | 15365                   | 1508                            | 13                                           | 13                                       | 0                | 3.43.E+09          | 3.46.E+09          | 3.51.E+09          | 3.31.E+09          | 2.78.E+09              | 2.85.E+09              | 2.92.E+09              | 2.89.E+09              |
| 390 | P30838    | Aldehyde dehydrogenase, dimeric NADP-preferring [OS=Homo sapiens]           | 125.3         | 37           | 13         | 191    | 12                | 1999                    | 248                             | 13                                           | 13                                       | 1                | 1.44.E+08          | 1.36.E+08          | 1.50.E+08          | 1.14.E+08          | 1.79.E+08              | 1.68.E+08              | 2.05.E+08              | 1.75.E+08              |
| 391 | P25786-1  | Proteasome subunit alpha type-1 [OS=Homo sapiens]                           | 125.2         | 64           | 14         | 528    | 14                | 6654                    | 707                             | 14                                           | 14                                       | 0                | 6.39.E+08          | 7.21.E+08          | 6.47.E+08          | 6.75.E+08          | 7.87.E+08              | 8.24.E+08              | 7.99.E+08              | 7.99.E+08              |
| 392 | Q9HB71    | Calcyclin-binding protein [OS=Homo sapiens]                                 | 124.9         | 62           | 10         | 433    | 10                | 5204                    | 624                             | 9                                            | 10                                       | 0                | 9.50.E+08          | 9.86.E+08          | 9.66.E+08          | 9.55.E+08          | 8.59.E+08              | 9.88.E+08              | 9.96.E+08              | 9.70.E+08              |
| 393 | P18085    | ADP-ribosylation factor 4 [OS=Homo sapiens]                                 | 124.7         | 71           | 11         | 613    | 5                 | 8203                    | 1032                            | 10                                           | 11                                       | 0                | 3.96.E+08          | 3.66.E+08          | 3.79.E+08          | 4.43.E+08          | 5.59.E+08              | 5.24.E+08              | 4.63.E+08              | 5.27.E+08              |
| 394 | P55795    | heterogeneous nuclear ribonucleoprotein H2 [OS=Homo sapiens]                | 124.4         | 27           | 9          | 770    | 4                 | 12549                   | 1068                            | 9                                            | 8                                        | 0                | 2.31.E+08          | 2.79.E+08          | 2.04.E+08          | 2.11.E+08          | 2.02.E+08              | 2.04.E+08              | 1.86.E+08              | 2.52.E+08              |
| 395 | Q8NC51-1  | Plasminogen activator inhibitor 1 RNA-binding protein [OS=Homo sapiens]     | 123.5         | 39           | 14         | 449    | 14                | 6213                    | 258                             | 12                                           | 14                                       | 0                | 9.21.E+08          | 9.15.E+08          | 8.57.E+08          | 9.51.E+08          | 9.20.E+08              | 8.67.E+08              | 9.15.E+08              | 8.75.E+08              |
| 396 | Q1KMD3    | heterogeneous nuclear ribonucleoprotein U-like protein 2 [OS=Homo sapiens]  | 123.4         | 31           | 13         | 328    | 13                | 4212                    | 449                             | 13                                           | 13                                       | 0                | 6.07.E+08          | 5.90.E+08          | 5.55.E+08          | 6.03.E+08          | 4.71.E+08              | 4.64.E+08              | 4.26.E+08              | 4.30.E+08              |
| 397 | Q9H0U4    | ras-related protein Rab-1B [OS=Homo sapiens]                                | 123.3         | 72           | 11         | 894    | 4                 | 14182                   | 1210                            | 11                                           | 11                                       | 7                | 2.20.E+09          | 2.07.E+09          | 2.11.E+09          | 2.06.E+09          | 2.23.E+09              | 2.33.E+09              | 2.31.E+09              | 2.31.E+09              |
| 398 | Q99460    | 26S proteasome non-ATPase regulatory subunit 1 [OS=Homo sapiens]            | 123.2         | 32           | 17         | 420    | 17                | 2882                    | 396                             | 17                                           | 17                                       | 0                | 4.90.E+08          | 5.00.E+08          | 4.65.E+08          | 5.19.E+08          | 4.74.E+08              | 5.44.E+08              | 4.97.E+08              | 5.37.E+08              |
| 399 | P16989-1  | Y-box-binding protein 3 [OS=Homo sapiens]                                   | 122.9         | 39           | 10         | 456    | 5                 | 4512                    | 541                             | 10                                           | 10                                       | 0                | 6.26.E+07          | 6.71.E+07          | 5.04.E+07          | 6.56.E+07          | 8.03.E+07              | 7.71.E+07              | 7.24.E+07              | 7.81.E+07              |
| 400 | P07954    | fumarate hydratase, mitochondrial [OS=Homo sapiens]                         | 122.5         | 50           | 14         | 513    | 14                | 7751                    | 644                             | 14                                           | 14                                       | 0                | 6.72.E+08          | 6.63.E+08          | 6.37.E+08          | 6.82.E+08          | 7.47.E+08              | 7.30.E+08              | 6.73.E+08              | 6.18.E+08              |
| 401 | Q9H3U1    | Protein unc-45 homolog A [OS=Homo sapiens]                                  | 122.3         | 22           | 12         | 431    | 12                | 7308                    | 495                             | 12                                           | 12                                       | 0                | 2.87.E+08          | 2.76.E+08          | 2.82.E+08          | 2.69.E+08          | 2.60.E+08              | 2.55.E+08              | 2.59.E+08              | 2.27.E+08              |
| 402 | O75531    | Barrier-to-autointegration factor [OS=Homo sapiens]                         | 122.3         | 76           | 9          | 607    | 9                 | 4910                    | 757                             | 9                                            | 9                                        | 0                | 1.19.E+09          | 1.21.E+09          | 1.14.E+09          | 1.27.E+09          | 1.21.E+09              | 1.13.E+09              | 1.14.E+09              | 1.05.E+09              |
| 403 | A1L0T0    | Acetylactate synthase-like protein [OS=Homo sapiens]                        | 122.1         | 40           | 12         | 220    | 12                | 4696                    | 348                             | 12                                           | 12                                       | 0                | 2.12.E+08          | 2.13.E+08          | 3.25.E+08          | 3.10.E+08          | 2.60.E+08              | 2.51.E+08              | 2.13.E+08              | 2.52.E+08              |
| 404 | P12004    | proliferating cell nuclear antigen [OS=Homo sapiens]                        | 122.0         | 61           | 10         | 640    | 10                | 11097                   | 959                             | 10                                           | 10                                       | 0                | 1.00.E+09          | 8.91.E+08          | 8.42.E+08          | 8.41.E+08          | 1.19.E+09              | 1.12.E+09              | 1.16.E+09              | 1.05.E+09              |
| 405 | Q71D13    | histone H3.2 [OS=Homo sapiens]                                              | 121.8         | 48           | 6          | 1830   | 1                 | 34476                   | 2608                            | 6                                            | 5                                        | 0                | 1.71.E+09          | 1.49.E+09          | 1.67.E+09          | 1.67.E+09          | 6.80.E+08              | 6.03.E+08              | 5.19.E+08              | 5.93.E+08              |
| 406 | P45974-1  | Ubiquitin carboxyl-terminal hydrolase 5 [OS=Homo sapiens]                   | 121.7         | 26           | 13         | 518    | 13                | 4855                    | 656                             | 13                                           | 13                                       | 0                | 3.21.E+08          | 3.09.E+08          | 2.65.E+08          | 3.46.E+08          | 3.77.E+08              | 3.67.E+08              | 3.68.E+08              | 3.73.E+08              |
| 407 | Q9Y2X3    | Nucleolar protein 58 [OS=Homo sapiens]                                      | 121.7         | 37           | 13         | 508    | 13                | 6531                    | 551                             | 13                                           | 13                                       | 0                | 5.40.E+08          | 5.13.E+08          | 4.91.E+08          | 5.01.E+08          | 3.72.E+08              | 3.78.E+08              | 3.74.E+08              | 3.80.E+08              |
| 408 | Q15691    | Microtubule-associated protein RP/EB family member 1 [OS=Homo sapiens]      | 121.6         | 65           | 12         | 424    | 12                | 5600                    | 489                             | 11                                           | 12                                       | 0                | 3.58.E+08          | 3.51.E+08          | 3.68.E+08          | 3.36.E+08          | 5.28.E+08              | 5.19.E+08              | 5.50.E+08              | 5.26.E+08              |
| 409 | Q9Y265    | RuvB-like 1 [OS=Homo sapiens]                                               | 121.4         | 35           | 12         | 568    | 12                | 7656                    | 804                             | 12                                           | 12                                       | 0                | 7.46.E+08          | 7.29.E+08          | 6.47.E+08          | 7.73.E+08          | 8.22.E+08              | 8.34.E+08              | 7.03.E+08              | 8.10.E+08              |
| 410 | P68036    | Ubiquitin-conjugating enzyme E2 L3 [OS=Homo sapiens]                        | 121.3         | 68           | 8          | 463    | 8                 | 5658                    | 749                             | 8                                            | 8                                        | 0                | 7.64.E+08          | 8.19.E+08          | 6.65.E+08          | 8.19.E+08          | 1.02.E+09              | 1.07.E+09              | 1.00.E+09              | 1.03.E+09              |
| 411 | Q9UMS4    | Pre-mRNA-processing factor 19 [OS=Homo sapiens]                             | 120.9         | 44           | 12         | 349    | 12                | 3985                    | 497                             | 11                                           | 11                                       | 0                | 8.15.E+08          | 8.12.E+08          | 8.17.E+08          | 7.76.E+08          | 7.99.E+08              | 8.57.E+08              | 8.64.E+08              | 8.41.E+08              |
| 412 | P32119    | Peroxiredoxin-2 [OS=Homo sapiens]                                           | 120.6         | 66           | 11         | 748    | 10                | 9181                    | 1029                            | 11                                           | 11                                       | 0                | 1.02.E+09          | 1.07.E+09          | 1.11.E+09          | 1.16.E+09          | 1.40.E+09              | 1.44.E+09              | 1.48.E+09              | 1.45.E+09              |
| 413 | P27635    | 60S ribosomal protein L10 [OS=Homo sapiens]                                 | 120.2         | 46           | 12         | 734    | 12                | 7813                    | 950                             | 12                                           | 11                                       | 0                | 1.82.E+09          | 1.67.E+09          | 1.81.E+09          | 1.67.E+09          | 1.53.E+09              | 1.54.E+09              | 1.74.E+09              | 1.60.E+09              |
| 414 | Q14444-1  | Caprin-1 [OS=Homo sapiens]                                                  | 119.6         | 21           | 9          | 451    | 9                 | 8116                    | 643                             | 9                                            | 9                                        | 0                | 4.99.E+08          | 5.36.E+08          | 4.64.E+08          | 5.39.E+08          | 5.33.E+08              | 5.34.E+08              | 4.89.E+08              | 5.29.E+08              |
| 415 | Q9HB16    | Phylloquinone omega-hydroxylase CYP4F11 [OS=Homo sapiens]                   | 119.4         | 39           | 15         | 440    | 15                | 3057                    | 539                             | 15                                           | 15                                       | 0                | 3.46.E+08          | 3.56.E+08          | 3.20.E+08          | 2.90.E+08          | 4.87.E+08              | 4.87.E+08              | 4.02.E+08              | 4.55.E+08              |
| 416 | P13667    | Protein disulfide-isomerase A4 [OS=Homo sapiens]                            | 119.3         | 33           | 20         | 277    | 20                | 1931                    | 274                             | 20                                           | 19                                       | 0                | 6.60.E+08          | 6.28.E+08          | 6.81.E+08          | 6.80.E+08          | 9.67.E+08              | 9.77.E+08              | 1.02.E+09              | 9.65.E+08              |
| 417 | Q16531    | DNA damage-binding protein 1 [OS=Homo sapiens]                              | 119.2         | 20           | 17         | 229    | 17                | 2012                    | 242                             | 17                                           | 16                                       | 0                | 4.75.E+08          | 4.99.E+08          | 5.20.E+08          | 4.59.E+08          | 6.16.E+08              | 6.58.E+08              | 6.67.E+08              | 6.34.E+08              |
| 418 | Q08J23    | tRNA (Cytosine(34)-C(5))-methyltransferase [OS=Homo sapiens]                | 119.2         | 33           | 16         | 483    | 16                | 4886                    | 623                             | 16                                           | 16                                       | 0                | 5.04.E+08          | 5.25.E+08          | 4.99.E+08          | 5.09.E+08          | 5.31.E+08              | 5.21.E+08              | 4.55.E+08              | 5.05.E+08              |
| 419 | O15371    | Eukaryotic translation initiation factor 3 subunit D [OS=Homo sapiens]      | 119.2         | 39           | 13         | 304    | 13                | 3649                    | 340                             | 13                                           | 13                                       | 0                | 3.60.E+08          | 3.34.E+08          | 3.26.E+08          | 3.57.E+08          | 2.90.E+08              | 3.08.E+08              | 3.13.E+08              | 3.20.E+08              |
| 420 | P06493    | Cyclin-dependent kinase 1 [OS=Homo sapiens]                                 | 118.9         | 50           | 12         | 287    | 11                | 2490                    | 360                             | 12                                           | 12                                       | 1                | 9.83.E+08          | 9.39.E+08          | 9.76.E+08          | 8.61.E+08          | 1.11.E+09              | 1.10.E+09              | 1.20.E+09              | 1.14.E+09              |
| 421 | P17980    | 26S proteasome regulatory subunit 6A [OS=Homo sapiens]                      | 118.2         | 45           | 13         | 460    | 13                | 6353                    | 591                             | 13                                           | 13                                       | 0                | 4.08.E+08          | 4.32.E+08          | 3.98.E+08          | 4.08.E+08          | 4.44.E+08              | 4.43.E+08              | 4.27.E+08              | 4.31.E+08              |
| 422 | P62277    | 40S ribosomal protein S13 [OS=Homo sapiens]                                 | 117.9         | 50           | 11         | 1188   | 11                | 9173                    | 1143                            | 11                                           | 11                                       | 0                | 3.45.E+09          | 3.36.E+09          | 3.57.E+09          | 3.34.E+09          | 3.23.E+09              | 3.12.E+09              | 3.34.E+09              | 3.22.E+09              |
| 423 | Q99873    | protein arginine N-methyltransferase 1 [OS=Homo sapiens]                    | 117.1         | 44           | 14         | 298    | 14                | 824                     | 14                              | 14                                           | 14                                       | 0                | 9.66.E+08          | 9.51.E+08          | 9.53.E+08          | 9.01.E+08          | 7.36.E+08              | 7.65.E+08              | 7.65.E+08              | 7.29.E+08              |
| 424 | Q16181    | Septin-7 [OS=Homo sapiens]                                                  | 117.1         | 32           | 10         | 578    | 9                 | 7868                    | 767                             | 10                                           | 10                                       | 0                | 4.13.E+08          | 4.22.E+08          | 3.84.E+08          | 4.30.E+08          | 4.65.E+08              | 4.53.E+08              | 4.20.E+08              | 4.56.E+08              |
| 425 | P54136-1  | arginine-tRNA ligase, cytoplasmic [OS=Homo sapiens]                         | 116.3         | 34           | 17         | 559    | 17                | 5962                    | 617                             | 17                                           | 17                                       | 0                | 6.39.E+08          | 5.98.E+08          | 6.48.E+08          | 6.51.E+08          | 6.48.E+08              | 7.13.E+08              | 7.72.E+08              | 8.69.E+08              |
| 426 | P35637-1  | RNA-binding protein FUS [OS=Homo sapiens]                                   | 116.1         | 20           | 7          | 503    | 5                 | 6804                    | 725                             | 7                                            | 7                                        | 2                | 7.46.E+08          | 7.26.E+08          | 6.12.E+08          | 6.52.E+08          | 8.67.E+08              | 7.97.E+08              | 8.19.E+08              | 7.86.E+08              |
| 427 | O75367-1  | Core histone macro-H2A.1 [OS=Homo sapiens]                                  | 115.8         | 41           | 11         | 406    | 11                | 3859                    | 571                             | 11                                           | 11                                       | 0                | 7.02.E+08          | 7.14.E+08          | 7.13.E+08          | 6.57.E+08          | 7.62.E+08              | 7.71.E+08              | 6.76.E+08              | 7.89.E+08              |
| 428 | P56537-1  | eukaryotic translation initiation factor 6 [OS=Homo sapiens]                | 115.8         | 57           | 8          | 551    | 8                 | 11336                   | 917                             | 8                                            | 8                                        | 0                | 9.60.E+08          | 9.53.E+08          | 9.27.E+08          | 1.01.E+09          | 9.75.E+08              | 9.14.E+08              | 8.77.E+08              | 9.16.E+08              |
| 429 | P51665    | 26S proteasome non-ATPase regulatory subunit 7 [OS=Homo sapiens]            | 115.8         | 40           | 7          | 469    | 7                 | 7795                    | 743                             | 7                                            | 7                                        | 0                | 4.13.E+08          | 3.70.E+08          | 3.82.E+08          | 4.05.E+08          | 4.37.E+08              | 4.21.E+08              | 4.44.E+08              | 4.49.E+08              |
| 430 | Q9UM47    | Neurogenic locus notch homolog protein 3 [OS=Homo sapiens]                  | 115.0         | 10           | 14         | 326    | 14                | 5366                    | 444                             | 14                                           | 14                                       | 0                | 1.43.E+08          | 1.56.E+08          | 1.50.E+08          | 1.56.E+08          | 2.95.E+08              | 2.90.E+08              | 2.77.E+08              | 2.91.E+08              |
| 431 | P15880    | 40S ribosomal protein S2 [OS=Homo sapiens]                                  | 115.0         | 51           | 14         | 966    | 14                | 10818                   | 1195                            | 14                                           | 14                                       | 0                | 2.49.E+09          | 2.44.E+09          | 2.56.E+09          | 2.54.E+09          | 2.35.E+09              | 2.34.E+09              | 2.50.E+09              | 2.38.E+09              |
| 432 | P27816-1  | Microtubule-associated protein 4 [OS=Homo sapiens]                          | 114.8         | 15           | 12         | 286    | 12                | 2697                    | 280                             | 11                                           | 12                                       | 0                | 2.24.E+08          | 1.88.E+08          | 2.30.E+08          | 2.42.E+08          | 3.07.E+08              | 2.90.E+08              | 2.92.E+08              | 2.99.E+08              |
| 433 | P18621    | 60S ribosomal protein L17 [OS=Homo sapiens]                                 | 114.7         | 52           | 11         | 632    | 11                | 5321                    | 720                             | 11                                           | 10                                       | 0                | 1.81.E+09          | 1.63.E+09          | 1.76.E+09          | 1.76.E+09          | 1.69.E+09              | 1.68.E+09              | 1.81.E+09              | 1.72.E+09              |
| 434 | P41567    | eukaryotic translation initiation factor 1 [OS=Homo sapiens]                | 114.7         | 82           | 10         | 349    | 5                 | 8889                    | 253                             | 8                                            | 10                                       | 5                | 4.75.E+08          | 5.50.E+08          | 4.23.E+08          | 5.28.E+08          | 6.32.E+08              | 6.28.E+08              | 5.66.E+08              | 6.40.E+08              |
| 435 | P62263    | 40S ribosomal protein S14 [OS=Homo sapiens]                                 | 114.3         | 72           | 11         | 476    | 11                | 4804                    | 472                             | 11                                           | 11                                       | 0                | 1.08.E+09          | 1.04.E+09          | 1.12.E+09          | 1.10.E+09          | 9.68.E+08              | 9.59.E+08              | 1.05.E+09              | 9.42.E+08              |
| 436 | Q96T76-1  | MMS19 nucleotide excision repair protein homolog [OS=Homo sapiens]          | 114.2         | 18           | 11         | 306    | 11                | 5092                    | 388                             | 11                                           | 11                                       | 0                | 2.20.E+08          | 2.08.E+08          | 1.92.E+08          | 1.88.E+08          | 2.36.E+08              | 2.06.E+08              | 1.94.E+08              | 2.09.E+08              |
| 437 | P30566    | adenylosuccinate lyase [OS=Homo sapiens]                                    | 113.6         | 45           | 13         | 397    | 13                | 3459                    | 393                             | 12                                           | 12                                       | 0                | 3.12.E+08          | 3.17.E+08          | 2.97.E+08          | 3.10.E+08          | 4.94.E+08              | 4.54.E+08              | 4.05.E+08              | 4.45.E+08              |
| 438 | Q10471    | Polypeptide N-acetylgalactosaminyltransferase 2 [OS=Homo sapiens]           | 113.6         | 32           | 13         | 465    | 13                | 5039                    | 522                             | 13                                           | 12                                       | 0                | 2.86.E+08          | 2.68.E+08          | 2.76.E+08          | 3.18.E+08          | 4.15.E+08              | 4.27.E+08              | 3.16.E+08              | 4.26.E+08              |
| 439 | Q15293    | Reticulocalbin-1 [OS=Homo sapiens]                                          | 113.6         | 47           | 11         | 388    | 11                | 4095                    | 447                             | 11                                           | 11                                       | 0                | 8.12.E+08          | 8.03.E+08          | 7.88.E+08          | 8.12.E+08          | 9.84.E+08              | 9.97.E+08              | 1.03.E+09              | 1.00.E+09              |
| 440 | Q9UG18    | Testin [OS=Homo sapiens]                                                    | 113.2         | 40           | 12         | 219    | 12                | 1913                    | 270                             | 12                                           | 12                                       | 0                | 2.91.E+08          | 2.63.E+08          | 2.91.E+08          | 3.01.E+08          | 1.98.E+08              | 2.28.E+08              |                        |                        |



| No. | Accession | Description                                                                        | Sum PEP Score | Coverage [%] | # Peptides | # PSMs | # Unique Peptides | Score Mascot: A5 Mascot | Score Sequest HT: A2 Sequest HT | # Peptides (by Search Engine): A2 Sequest HT | # Peptides (by Search Engine): A5 Mascot | # Razor Peptides | ctrl Abundance s_1 | ctrl Abundance s_2 | ctrl Abundance s_3 | ctrl Abundance s_4 | JAM-A KO Abundance s_1 | JAM-A KO Abundance s_2 | JAM-A KO Abundance s_3 | JAM-A KO Abundance s_4 |
|-----|-----------|------------------------------------------------------------------------------------|---------------|--------------|------------|--------|-------------------|-------------------------|---------------------------------|----------------------------------------------|------------------------------------------|------------------|--------------------|--------------------|--------------------|--------------------|------------------------|------------------------|------------------------|------------------------|
| 443 | P05534    | HLA class I histocompatibility antigen, A-24 alpha chain [OS=Homo sapiens]         | 112.1         | 35           | 7          | 360    | 0                 | 5715                    | 660                             | 7                                            | 7                                        | 0                |                    |                    |                    |                    |                        |                        |                        |                        |
| 444 | Q92598    | Heat shock protein 105 kDa [OS=Homo sapiens]                                       | 111.8         | 30           | 16         | 312    | 14                | 3687                    | 377                             | 16                                           | 16                                       | 1                | 3.39.E+08          | 3.52.E+08          | 3.63.E+08          | 3.40.E+08          | 3.78.E+08              | 4.14.E+08              | 3.07.E+08              | 3.71.E+08              |
| 445 | Q6F113    | Histone H2A type 2-A [OS=Homo sapiens]                                             | 111.8         | 58           | 7          | 2281   | 3                 | 25618                   | 3203                            | 7                                            | 7                                        | 0                | 4.80.E+09          | 4.57.E+09          | 4.92.E+09          | 4.01.E+09          | 3.76.E+09              | 3.68.E+09              | 4.18.E+09              | 3.87.E+09              |
| 446 | P08708    | 40S ribosomal protein S17 [OS=Homo sapiens]                                        | 111.6         | 63           | 9          | 680    | 9                 | 9290                    | 922                             | 9                                            | 9                                        | 0                | 1.05.E+09          | 1.04.E+09          | 1.02.E+09          | 1.11.E+09          | 9.89.E+08              | 9.45.E+08              | 9.29.E+08              | 9.63.E+08              |
| 447 | Q96FW1    | Ubiquitin thioesterase otub1 [OS=Homo sapiens]                                     | 111.2         | 45           | 10         | 458    | 10                | 5828                    | 514                             | 10                                           | 10                                       | 0                | 5.97.E+08          | 6.13.E+08          | 6.25.E+08          | 6.98.E+08          | 7.10.E+08              | 8.28.E+08              | 7.38.E+08              | 7.02.E+08              |
| 448 | Q01469    | Fatty acid-binding protein, epidermal [OS=Homo sapiens]                            | 110.9         | 72           | 10         | 398    | 10                | 6720                    | 588                             | 8                                            | 10                                       | 0                | 1.16.E+09          | 1.17.E+09          | 1.17.E+09          | 1.07.E+09          | 1.10.E+09              | 1.11.E+09              | 1.16.E+09              | 1.12.E+09              |
| 449 | P11216    | Glycogen phosphorylase, brain form [OS=Homo sapiens]                               | 110.8         | 23           | 15         | 278    | 13                | 4520                    | 318                             | 15                                           | 15                                       | 2                | 3.28.E+08          | 3.41.E+08          | 3.23.E+08          | 3.20.E+08          | 2.65.E+08              | 2.53.E+08              | 2.38.E+08              | 2.63.E+08              |
| 450 | P07741-1  | Adenine phosphoribosyltransferase [OS=Homo sapiens]                                | 110.7         | 64           | 9          | 418    | 9                 | 9593                    | 608                             | 8                                            | 9                                        | 0                | 7.86.E+08          | 8.02.E+08          | 6.70.E+08          | 7.23.E+08          | 9.38.E+08              | 9.27.E+08              | 8.34.E+08              | 9.01.E+08              |
| 451 | P62873    | Guanine nucleotide-binding protein G(I)/G(S)/G(T) subunit beta-1 [OS=Homo sapiens] | 110.5         | 58           | 13         | 219    | 9                 | 2892                    | 249                             | 11                                           | 13                                       | 4                | 4.56.E+08          | 2.83.E+08          | 3.03.E+08          | 3.30.E+08          | 5.67.E+08              | 5.80.E+08              | 5.27.E+08              | 5.23.E+08              |
| 452 | P00387    | NADH-cytochrome b5 reductase 3 [OS=Homo sapiens]                                   | 110.3         | 43           | 9          | 348    | 9                 | 4500                    | 645                             | 9                                            | 9                                        | 0                | 4.63.E+08          | 4.78.E+08          | 3.99.E+08          | 4.34.E+08          | 4.46.E+08              | 4.76.E+08              | 3.87.E+08              | 4.61.E+08              |
| 453 | P98179    | RNA-binding protein 3 [OS=Homo sapiens]                                            | 109.8         | 54           | 6          | 649    | 6                 | 10888                   | 1008                            | 5                                            | 6                                        | 0                | 1.01.E+09          | 1.04.E+09          | 9.75.E+08          | 1.03.E+09          | 8.52.E+08              | 8.31.E+08              | 8.06.E+08              | 7.90.E+08              |
| 454 | P25789    | Proteasome subunit alpha type-4 [OS=Homo sapiens]                                  | 109.8         | 51           | 9          | 427    | 9                 | 7689                    | 627                             | 9                                            | 9                                        | 0                | 6.28.E+08          | 6.32.E+08          | 6.08.E+08          | 6.02.E+08          | 7.11.E+08              | 7.13.E+08              | 7.25.E+08              | 7.52.E+08              |
| 455 | Q9NSD9    | Phenylalanine-tRNA ligase beta subunit [OS=Homo sapiens]                           | 109.8         | 31           | 13         | 454    | 13                | 3342                    | 573                             | 13                                           | 13                                       | 0                | 7.43.E+08          | 7.34.E+08          | 7.50.E+08          | 7.28.E+08          | 8.77.E+08              | 8.12.E+08              | 7.46.E+08              | 7.86.E+08              |
| 456 | A0MZ66    | Shootin-1 [OS=Homo sapiens]                                                        | 109.7         | 32           | 15         | 263    | 15                | 2319                    | 257                             | 15                                           | 15                                       | 0                | 3.27.E+08          | 3.24.E+08          | 3.12.E+08          | 3.22.E+08          | 5.12.E+08              | 5.02.E+08              | 5.07.E+08              | 4.90.E+08              |
| 457 | Q9BUJ2-1  | Heterogeneous nuclear ribonucleoprotein U-like protein 1 [OS=Homo sapiens]         | 109.6         | 21           | 12         | 354    | 12                | 4245                    | 425                             | 12                                           | 11                                       | 0                | 3.30.E+08          | 2.86.E+08          | 3.22.E+08          | 3.21.E+08          | 2.04.E+08              | 2.48.E+08              | 2.51.E+08              | 2.13.E+08              |
| 458 | Q92688    | Acidic leucine-rich nuclear phosphoprotein 32 family member B [OS=Homo sapiens]    | 109.4         | 32           | 10         | 616    | 5                 | 12330                   | 796                             | 10                                           | 10                                       | 5                | 9.11.E+08          | 9.75.E+08          | 9.86.E+08          | 9.23.E+08          | 1.18.E+09              | 1.13.E+09              | 1.05.E+09              | 1.08.E+09              |
| 459 | O43813    | LanC-like protein 1 [OS=Homo sapiens]                                              | 109.4         | 42           | 10         | 321    | 10                | 4440                    | 493                             | 10                                           | 10                                       | 0                | 5.54.E+08          | 6.18.E+08          | 6.30.E+08          | 6.10.E+08          | 6.75.E+08              | 6.79.E+08              | 6.41.E+08              | 7.47.E+08              |
| 460 | P55327    | Tumor protein D52 [OS=Homo sapiens]                                                | 109.2         | 60           | 9          | 455    | 9                 | 7266                    | 663                             | 9                                            | 9                                        | 0                | 3.71.E+08          | 4.29.E+08          | 4.19.E+08          | 4.33.E+08          | 6.35.E+08              | 6.25.E+08              | 6.13.E+08              | 6.44.E+08              |
| 461 | P25787    | Proteasome subunit alpha type-2 [OS=Homo sapiens]                                  | 108.6         | 36           | 7          | 453    | 7                 | 6692                    | 608                             | 7                                            | 7                                        | 0                | 4.53.E+08          | 4.72.E+08          | 4.30.E+08          | 4.46.E+08          | 5.02.E+08              | 5.17.E+08              | 5.09.E+08              | 5.12.E+08              |
| 462 | Q86V81    | THO complex subunit 4 [OS=Homo sapiens]                                            | 108.6         | 42           | 6          | 383    | 6                 | 8201                    | 624                             | 6                                            | 6                                        | 0                | 8.81.E+08          | 7.93.E+08          | 8.26.E+08          | 8.71.E+08          | 7.85.E+08              | 7.29.E+08              | 7.81.E+08              | 7.49.E+08              |
| 463 | P30040-1  | Endoplasmic reticulum resident protein 29 [OS=Homo sapiens]                        | 108.5         | 52           | 10         | 786    | 10                | 11146                   | 1018                            | 10                                           | 10                                       | 0                | 1.30.E+09          | 1.31.E+09          | 1.30.E+09          | 1.33.E+09          | 1.50.E+09              | 1.44.E+09              | 1.39.E+09              | 1.45.E+09              |
| 464 | Q92973-1  | transportin-1 [OS=Homo sapiens]                                                    | 108.5         | 30           | 18         | 443    | 18                | 3230                    | 372                             | 17                                           | 16                                       | 0                | 6.35.E+08          | 6.53.E+08          | 6.30.E+08          | 6.04.E+08          | 6.38.E+08              | 6.53.E+08              | 6.34.E+08              | 6.63.E+08              |
| 465 | Q3LXA3    | Triokinase/FMN cyclase [OS=Homo sapiens]                                           | 108.4         | 41           | 14         | 207    | 14                | 2371                    | 213                             | 14                                           | 12                                       | 0                | 3.32.E+08          | 3.49.E+08          | 3.29.E+08          | 3.25.E+08          | 3.89.E+08              | 4.24.E+08              | 2.85.E+08              | 4.00.E+08              |
| 466 | P61313-1  | 60S ribosomal protein L15 [OS=Homo sapiens]                                        | 108.2         | 43           | 10         | 889    | 10                | 7698                    | 899                             | 10                                           | 10                                       | 0                | 1.66.E+09          | 1.73.E+09          | 1.79.E+09          | 1.76.E+09          | 1.38.E+09              | 1.47.E+09              | 1.53.E+09              | 1.44.E+09              |
| 467 | Q9UBT2    | SUMO-activating enzyme subunit 2 [OS=Homo sapiens]                                 | 108.2         | 36           | 14         | 302    | 14                | 1755                    | 292                             | 14                                           | 14                                       | 0                | 3.74.E+08          | 4.09.E+08          | 3.82.E+08          | 3.73.E+08          | 2.62.E+08              | 2.58.E+08              | 2.34.E+08              | 2.38.E+08              |
| 468 | O14979-1  | Heterogeneous nuclear ribonucleoprotein D-like [OS=Homo sapiens]                   | 107.1         | 27           | 12         | 797    | 9                 | 6657                    | 774                             | 12                                           | 12                                       | 0                | 6.09.E+08          | 6.24.E+08          | 6.36.E+08          | 5.70.E+08          | 5.68.E+08              | 5.85.E+08              | 5.82.E+08              | 5.72.E+08              |
| 469 | P80723    | Brain acid soluble protein 1 [OS=Homo sapiens]                                     | 107.1         | 70           | 11         | 499    | 11                | 4953                    | 671                             | 11                                           | 11                                       | 0                | 3.38.E+08          | 3.28.E+08          | 3.44.E+08          | 3.94.E+08          | 8.46.E+08              | 8.49.E+08              | 9.07.E+08              | 8.60.E+08              |
| 470 | P42166    | Lamina-associated polypeptide 2, isoform alpha [OS=Homo sapiens]                   | 107.0         | 24           | 8          | 407    | 3                 | 5349                    | 488                             | 8                                            | 8                                        | 0                | 2.96.E+07          | 3.35.E+07          | 4.53.E+07          | 2.57.E+07          | 2.53.E+07              | 3.26.E+07              | 2.55.E+07              | 3.44.E+07              |
| 471 | P05023    | Sodium/potassium-transporting ATPase subunit alpha-1 [OS=Homo sapiens]             | 106.8         | 20           | 14         | 267    | 14                | 2883                    | 349                             | 14                                           | 14                                       | 0                | 5.79.E+08          | 6.15.E+08          | 6.10.E+08          | 6.23.E+08          | 6.05.E+08              | 5.20.E+08              | 6.11.E+08              | 5.36.E+08              |
| 472 | P46776    | 60S ribosomal protein L27a [OS=Homo sapiens]                                       | 106.8         | 33           | 9          | 561    | 9                 | 11689                   | 815                             | 9                                            | 9                                        | 0                | 1.38.E+09          | 1.91.E+09          | 1.42.E+09          | 1.77.E+09          | 1.29.E+09              | 1.29.E+09              | 1.35.E+09              | 1.28.E+09              |
| 473 | Q15366-6  | Isoform 6 of Poly(rC)-binding protein 2 [OS=Homo sapiens]                          | 106.6         | 61           | 12         | 429    | 2                 | 1243                    | 12                              | 12                                           | 7                                        | 1.38.E+09        | 1.40.E+09          | 1.38.E+09          | 1.34.E+09          | 1.33.E+09          | 1.35.E+09              | 1.34.E+09              | 1.38.E+09              |                        |
| 474 | P68431    | Histone H3.1 [OS=Homo sapiens]                                                     | 106.0         | 48           | 6          | 1649   | 1                 | 28822                   | 2186                            | 6                                            | 5                                        | 5                | 2.11.E+10          | 1.87.E+10          | 2.02.E+10          | 2.34.E+10          | 1.63.E+10              | 1.51.E+10              | 1.80.E+10              | 1.55.E+10              |
| 475 | P11766    | alcohol dehydrogenase class-3 [OS=Homo sapiens]                                    | 106.0         | 45           | 13         | 242    | 13                | 2760                    | 320                             | 13                                           | 11                                       | 0                | 4.47.E+08          | 4.54.E+08          | 4.54.E+08          | 4.74.E+08          | 5.66.E+08              | 6.05.E+08              | 6.03.E+08              | 5.91.E+08              |
| 476 | P53992    | Protein transport protein sec24c [OS=Homo sapiens]                                 | 106.0         | 18           | 14         | 311    | 13                | 3400                    | 299                             | 14                                           | 13                                       | 0                | 3.05.E+08          | 2.90.E+08          | 2.75.E+08          | 2.89.E+08          | 3.58.E+08              | 3.37.E+08              | 3.06.E+08              | 3.58.E+08              |
| 477 | P08134    | Rho-related GTP-binding protein RhoC [OS=Homo sapiens]                             | 105.8         | 63           | 9          | 625    | 1                 | 10036                   | 914                             | 9                                            | 9                                        | 0                | 1.88.E+07          | 2.17.E+07          | 1.72.E+07          | 1.94.E+07          | 9.96.E+06              | 9.85.E+06              | 8.18.E+06              | 9.15.E+06              |
| 478 | P33316-3  | Deoxyuridine 5'-triphosphate nucleotidohydrolase, mitochondrial [OS=Homo sapiens]  | 105.6         | 38           | 8          | 652    | 8                 | 11499                   | 1042                            | 8                                            | 8                                        | 0                | 1.36.E+09          | 1.40.E+09          | 1.46.E+09          | 1.37.E+09          | 1.81.E+09              | 1.81.E+09              | 1.66.E+09              | 1.81.E+09              |
| 479 | Q9UK76    | Jupiter microtubule associated homolog 1 [OS=Homo sapiens]                         | 105.4         | 65           | 5          | 359    | 5                 | 5479                    | 760                             | 5                                            | 5                                        | 0                | 6.06.E+08          | 6.25.E+08          | 6.35.E+08          | 6.04.E+08          | 4.36.E+08              | 4.50.E+08              | 4.54.E+08              | 4.84.E+08              |
| 480 | P05091    | Aldehyde dehydrogenase, mitochondrial [OS=Homo sapiens]                            | 105.1         | 39           | 14         | 383    | 12                | 4148                    | 467                             | 14                                           | 13                                       | 0                | 3.99.E+08          | 4.11.E+08          | 3.86.E+08          | 4.16.E+08          | 4.75.E+08              | 4.74.E+08              | 4.31.E+08              | 4.62.E+08              |
| 481 | Q96TA1    | Niban-like protein 1 [OS=Homo sapiens]                                             | 105.1         | 23           | 11         | 382    | 11                | 4753                    | 478                             | 11                                           | 10                                       | 0                | 3.47.E+08          | 4.02.E+08          | 3.26.E+08          | 3.68.E+08          | 2.77.E+08              | 2.67.E+08              | 2.27.E+08              | 2.69.E+08              |
| 482 | O00625    | Pirin [OS=Homo sapiens]                                                            | 104.9         | 61           | 10         | 505    | 10                | 4068                    | 607                             | 10                                           | 10                                       | 0                | 6.32.E+08          | 6.46.E+08          | 6.29.E+08          | 6.35.E+08          | 8.66.E+08              | 8.25.E+08              | 8.35.E+08              | 8.48.E+08              |
| 483 | P14550    | alcohol dehydrogenase [NADP(+)] [OS=Homo sapiens]                                  | 104.8         | 54           | 12         | 256    | 11                | 3855                    | 381                             | 11                                           | 12                                       | 0                | 5.41.E+08          | 5.64.E+08          | 5.65.E+08          | 5.45.E+08          | 5.63.E+08              | 5.70.E+08              | 5.96.E+08              | 6.03.E+08              |
| 484 | Q96AE4    | Far upstream element-binding protein 1 [OS=Homo sapiens]                           | 104.7         | 27           | 15         | 537    | 11                | 6481                    | 606                             | 15                                           | 15                                       | 2                | 1.01.E+09          | 9.67.E+08          | 9.99.E+08          | 9.97.E+08          | 9.41.E+08              | 9.81.E+08              | 9.84.E+08              | 9.52.E+08              |
| 485 | O60763-1  | General vesicular transport factor p115 [OS=Homo sapiens]                          | 104.3         | 17           | 12         | 278    | 12                | 2908                    | 271                             | 12                                           | 12                                       | 0                | 1.77.E+08          | 2.95.E+08          | 1.73.E+08          | 3.01.E+08          | 4.01.E+08              | 2.64.E+08              | 4.01.E+08              | 3.79.E+08              |
| 486 | Q14166    | Tubulin-tyrosine ligase-like protein 12 [OS=Homo sapiens]                          | 104.0         | 34           | 12         | 274    | 12                | 3227                    | 406                             | 12                                           | 12                                       | 0                | 2.99.E+08          | 2.65.E+08          | 2.77.E+08          | 3.18.E+08          | 3.05.E+08              | 3.37.E+08              | 2.81.E+08              | 3.21.E+08              |
| 487 | P60660    | Myosin light polypeptide 6 [OS=Homo sapiens]                                       | 104.0         | 56           | 8          | 796    | 8                 | 10534                   | 948                             | 6                                            | 8                                        | 0                | 2.06.E+09          | 2.35.E+09          | 2.37.E+09          | 2.39.E+09          | 2.53.E+09              | 2.54.E+09              | 2.60.E+09              | 2.53.E+09              |
| 488 | P00491    | purine nucleoside phosphorylase [OS=Homo sapiens]                                  | 103.8         | 48           | 11         | 338    | 11                | 4977                    | 433                             | 11                                           | 11                                       | 0                | 3.94.E+08          | 4.15.E+08          | 3.71.E+08          | 3.91.E+08          | 3.62.E+08              | 3.95.E+08              | 3.61.E+08              | 3.89.E+08              |
| 489 | P07910-2  | Isoform C1 of Heterogeneous nuclear ribonucleoproteins C1/C2 [OS=Homo sapiens]     | 103.6         | 36           | 14         | 567    | 1                 |                         | 1381                            | 14                                           |                                          | 13               | 4.08.E+09          | 4.08.E+09          | 4.20.E+09          | 4.12.E+09          | 4.18.E+09              | 4.34.E+09              | 4.55.E+09              | 4.39.E+09              |
| 490 | O00264    | Membrane-associated progesterone receptor component 1 [OS=Homo sapiens]            | 103.4         | 57           | 9          | 267    | 8                 | 4885                    | 430                             | 9                                            | 8                                        | 1                | 3.75.E+08          | 3.78.E+08          | 3.84.E+08          | 3.55.E+08          | 4.06.E+08              | 4.02.E+08              | 4.12.E+08              | 4.09.E+08              |
| 491 | Q70J99-1  | Protein unc-13 homolog D [OS=Homo sapiens]                                         | 103.1         | 18           | 10         | 338    | 10                | 4803                    | 425                             | 10                                           | 10                                       | 0                | 2.19.E+08          | 2.22.E+08          | 1.45.E+08          | 2.61.E+08          | 1.58.E+08              | 1.40.E+08              | 1.37.E+08              | 1.78.E+08              |
| 492 | Q15185    | Prostaglandin E synthase 3 [OS=Homo sapiens]                                       | 103.0         | 39           | 7          | 510    | 7                 | 7081                    | 711                             | 7                                            | 7                                        | 0                | 2.34.E+09          | 2.33.E+09          | 2.35.E+09          | 2.10.E+09          | 2.65.E+09              | 2.50.E+09              | 2.81.E+09              | 2.77.E+09              |
| 493 | P20290-1  | transcription factor BTF3 [OS=Homo sapiens]                                        | 102.7         | 49           | 6          | 412    | 6                 | 8102                    | 706                             | 6                                            | 6                                        | 0                | 4.64.E+08          | 4.71.E+08          | 4.61.E+08          | 4.43.E+08          | 4.06.E+08              | 4.02.E+08              | 3.95.E+08              | 3.79.E+08              |
| 494 | Q13283    | Ras GTPase-activating protein-binding protein 1 [OS=Homo sapiens]                  | 102.7         | 41           | 11         | 417    | 10                | 3431                    | 379                             | 10                                           | 10                                       | 0                | 4.41.E+08          | 5.45.E+08          | 4.96.E+08          | 4.66.E+08          | 4.75.E+08              | 5.18.E+08              | 4.75.E+08              | 5.63.E+08              |
| 495 | Q15366-4  | Isoform 4 of Poly(rC)-binding protein 2 [OS=Homo sapiens]                          | 102.6         | 71           | 12         | 433    | 2                 |                         | 1304                            | 12                                           |                                          | 0                | 1.54.E+08          | 1.69.E+08          | 1.49.E+08          | 1.80.E+08          | 1.46.E+08              | 1.44.E+08              | 1.20.E+08              | 1.45.E+08              |
| 496 | P60900    | Proteasome subunit alpha type-6 [OS=Homo sapiens]                                  | 102.6         | 50           | 11         | 385    | 11                | 4512                    | 475                             | 11                                           | 11                                       | 0                | 6.59.E+08          | 6.69.E+08          | 6.75.E+08          | 6.80.E+08          | 7.86.E+08              | 7.69.E+08              | 7.98.E+08              | 7.69.E+08              |
| 497 | P62917    | 60S ribosomal protein L8 [OS=Homo sapiens]                                         | 102.3         | 50           | 11         | 700    | 11                | 7                       |                                 |                                              |                                          |                  |                    |                    |                    |                    |                        |                        |                        |                        |

| No. | Accession | Description                                                                          | Sum PEP Score | Coverage [%] | # Peptides | # PSMs | # Unique Peptides | Score Mascot: A5 Mascot | Score Sequest HT: A2 Sequest HT | # Peptides (by Search Engine): A2 Sequest HT | # Peptides (by Search Engine): A5 Mascot | # Razor Peptides | ctrl Abundance_s_1 | ctrl Abundance_s_2 | ctrl Abundance_s_3 | ctrl Abundance_s_4 | JAM-A KO Abundance_s_1 | JAM-A KO Abundance_s_2 | JAM-A KO Abundance_s_3 | JAM-A KO Abundance_s_4 |
|-----|-----------|--------------------------------------------------------------------------------------|---------------|--------------|------------|--------|-------------------|-------------------------|---------------------------------|----------------------------------------------|------------------------------------------|------------------|--------------------|--------------------|--------------------|--------------------|------------------------|------------------------|------------------------|------------------------|
| 500 | P05556-1  | Integrin beta-1 [OS=Homo sapiens]                                                    | 101.7         | 21           | 10         | 381    | 10                | 3862                    | 477                             | 10                                           | 9                                        | 0                | 3.46.E+08          | 4.49.E+08          | 3.64.E+08          | 3.92.E+08          | 5.54.E+08              | 5.86.E+08              | 4.91.E+08              | 4.93.E+08              |
| 501 | P04181-1  | Ornithine aminotransferase, mitochondrial [OS=Homo sapiens]                          | 101.4         | 38           | 10         | 179    | 10                | 3065                    | 268                             | 10                                           | 10                                       | 0                | 3.00.E+08          | 3.08.E+08          | 3.03.E+08          | 2.99.E+08          | 3.16.E+08              | 3.12.E+08              | 3.15.E+08              | 3.11.E+08              |
| 502 | Q9UBB4-1  | Ataxin-10 [OS=Homo sapiens]                                                          | 101.3         | 39           | 10         | 324    | 10                | 3808                    | 362                             | 10                                           | 10                                       | 0                | 2.30.E+08          | 2.03.E+08          | 1.91.E+08          | 1.79.E+08          | 2.55.E+08              | 2.44.E+08              | 2.61.E+08              | 2.60.E+08              |
| 503 | P30084    | Enoyl-CoA hydratase, mitochondrial [OS=Homo sapiens]                                 | 101.2         | 42           | 10         | 324    | 10                | 5458                    | 457                             | 10                                           | 10                                       | 0                | 5.19.E+08          | 5.04.E+08          | 5.38.E+08          | 5.84.E+08          | 4.75.E+08              | 4.59.E+08              | 4.73.E+08              | 4.77.E+08              |
| 504 | O96008    | Mitochondrial import receptor subunit TOM40 homolog [OS=Homo sapiens]                | 101.2         | 40           | 9          | 412    | 9                 | 6235                    | 481                             | 9                                            | 9                                        | 0                | 3.69.E+08          | 4.04.E+08          | 3.79.E+08          | 3.98.E+08          | 2.06.E+08              | 1.69.E+08              | 1.62.E+08              | 1.63.E+08              |
| 505 | O60814    | Histone H2B type 1-K [OS=Homo sapiens]                                               | 101.1         | 41           | 6          | 2653   | 2                 | 43470                   | 2266                            | 6                                            | 6                                        | 7                | 3.12.E+10          | 3.05.E+10          | 3.23.E+10          | 2.94.E+10          | 3.03.E+10              | 3.00.E+10              | 3.24.E+10              | 3.03.E+10              |
| 506 | P0C0S5    | Histone H2A.Z [OS=Homo sapiens]                                                      | 101.0         | 54           | 6          | 1091   | 4                 | 7358                    | 1218                            | 6                                            | 6                                        | 0                | 1.75.E+09          | 1.69.E+09          | 1.78.E+09          | 1.79.E+09          | 1.76.E+09              | 1.71.E+09              | 1.85.E+09              | 1.69.E+09              |
| 507 | P18465    | HLA class I histocompatibility antigen, B-57 alpha chain [OS=Homo sapiens]           | 100.7         | 33           | 8          | 385    | 1                 | 5504                    | 549                             | 8                                            | 8                                        | 1                | 1.59.E+08          | 1.42.E+08          | 1.57.E+08          | 1.48.E+08          | 1.95.E+08              | 1.76.E+08              | 1.85.E+08              | 1.87.E+08              |
| 508 | Q6NZI2-1  | caveolae-associated protein 1 [OS=Homo sapiens]                                      | 100.6         | 29           | 9          | 296    | 9                 | 3931                    | 300                             | 9                                            | 9                                        | 0                | 3.13.E+08          | 2.86.E+08          | 3.30.E+08          | 2.60.E+08          | 3.60.E+08              | 3.45.E+08              | 3.98.E+08              | 3.97.E+08              |
| 509 | P60228    | Eukaryotic translation initiation factor 3 subunit E [OS=Homo sapiens]               | 100.3         | 38           | 11         | 367    | 11                | 3170                    | 402                             | 11                                           | 11                                       | 0                | 4.00.E+08          | 3.79.E+08          | 3.43.E+08          | 3.84.E+08          | 3.44.E+08              | 3.51.E+08              | 3.52.E+08              | 3.68.E+08              |
| 510 | P60981-1  | Dextrin [OS=Homo sapiens]                                                            | 100.2         | 64           | 10         | 402    | 9                 | 4457                    | 347                             | 9                                            | 10                                       | 0                | 6.67.E+08          | 6.44.E+08          | 6.33.E+08          | 6.20.E+08          | 7.38.E+08              | 7.37.E+08              | 7.88.E+08              | 7.65.E+08              |
| 511 | P43487    | Ran-specific GTPase-activating protein [OS=Homo sapiens]                             | 99.9          | 60           | 7          | 408    | 7                 | 7675                    | 903                             | 7                                            | 7                                        | 0                | 1.27.E+09          | 1.30.E+09          | 1.28.E+09          | 1.22.E+09          | 1.35.E+09              | 1.41.E+09              | 1.20.E+09              | 1.34.E+09              |
| 512 | Q9BT78    | COP9 signalosome complex subunit 4 [OS=Homo sapiens]                                 | 99.8          | 39           | 11         | 303    | 11                | 2898                    | 341                             | 11                                           | 11                                       | 0                | 1.92.E+08          | 2.12.E+08          | 2.01.E+08          | 2.00.E+08          | 2.49.E+08              | 3.08.E+08              | 2.94.E+08              | 2.22.E+08              |
| 513 | P52306-1  | Rap1 GTPase-GDP dissociation stimulator 1 [OS=Homo sapiens]                          | 99.7          | 28           | 9          | 160    | 9                 | 2641                    | 182                             | 9                                            | 9                                        | 0                | 5.74.E+07          | 6.18.E+07          | 5.85.E+07          | 7.01.E+07          | 7.65.E+07              | 5.99.E+07              | 5.27.E+07              | 5.85.E+07              |
| 514 | Q9BTT0    | Acidic leucine-rich nuclear phosphoprotein 32 family member E [OS=Homo sapiens]      | 99.4          | 41           | 7          | 364    | 7                 | 7827                    | 612                             | 7                                            | 7                                        | 0                | 4.15.E+08          | 4.36.E+08          | 3.99.E+08          | 4.04.E+08          | 7.24.E+08              | 7.42.E+08              | 6.83.E+08              | 7.14.E+08              |
| 515 | P84085    | ADP-ribosylation factor 5 [OS=Homo sapiens]                                          | 99.1          | 42           | 8          | 577    | 1                 | 6847                    | 882                             | 7                                            | 8                                        | 0                | 1.46.E+08          | 1.35.E+08          | 6.46.E+07          | 6.86.E+07          | 1.33.E+08              | 1.19.E+08              | 1.16.E+08              | 1.13.E+08              |
| 516 | Q8IU6E    | Histone H2A type 2-B [OS=Homo sapiens]                                               | 99.1          | 58           | 5          | 1256   | 3                 | 18757                   | 1997                            | 5                                            | 5                                        | 0                | 1.89.E+09          | 1.94.E+09          | 2.16.E+09          | 2.16.E+09          | 2.38.E+09              | 2.38.E+09              | 2.43.E+09              | 2.43.E+09              |
| 517 | Q9H0A0    | RNA cytidine acetyltransferase [OS=Homo sapiens]                                     | 99.0          | 17           | 9          | 263    | 9                 | 3929                    | 272                             | 9                                            | 9                                        | 0                | 1.56.E+08          | 1.88.E+08          | 1.48.E+08          | 1.54.E+08          | 1.31.E+08              | 2.00.E+08              | 1.23.E+08              | 1.66.E+08              |
| 518 | O76094    | Signal recognition particle subunit SRP72 [OS=Homo sapiens]                          | 98.9          | 25           | 11         | 365    | 11                | 3960                    | 487                             | 11                                           | 11                                       | 0                | 2.12.E+08          | 2.30.E+08          | 1.99.E+08          | 2.19.E+08          | 2.47.E+08              | 1.82.E+08              | 1.64.E+08              | 2.04.E+08              |
| 519 | P62841    | 40S ribosomal protein S15 [OS=Homo sapiens]                                          | 98.9          | 56           | 5          | 366    | 5                 | 4722                    | 471                             | 5                                            | 5                                        | 0                | 4.41.E+08          | 4.11.E+08          | 3.73.E+08          | 4.32.E+08          | 2.92.E+08              | 2.89.E+08              | 2.94.E+08              | 2.78.E+08              |
| 520 | P55265-1  | Double-stranded RNA-specific adenosine deaminase [OS=Homo sapiens]                   | 98.7          | 17           | 16         | 242    | 16                | 1516                    | 199                             | 16                                           | 16                                       | 0                | 4.38.E+08          | 3.74.E+08          | 3.88.E+08          | 4.26.E+08          | 4.41.E+08              | 4.45.E+08              | 4.32.E+08              | 3.98.E+08              |
| 521 | Q14914    | Prostaglandin reductase 1 [OS=Homo sapiens]                                          | 98.7          | 45           | 9          | 348    | 9                 | 5391                    | 539                             | 9                                            | 9                                        | 0                | 4.22.E+08          | 3.99.E+08          | 3.99.E+08          | 3.90.E+08          | 7.04.E+08              | 6.75.E+08              | 6.26.E+08              | 7.18.E+08              |
| 522 | P14314    | Glucosidase 2 subunit beta [OS=Homo sapiens]                                         | 98.4          | 28           | 11         | 382    | 11                | 5950                    | 467                             | 11                                           | 11                                       | 0                | 9.73.E+08          | 8.57.E+08          | 8.75.E+08          | 8.78.E+08          | 1.01.E+09              | 1.02.E+09              | 1.04.E+09              | 1.01.E+09              |
| 523 | Q01105    | Protein SET [OS=Homo sapiens]                                                        | 98.3          | 45           | 9          | 669    | 9                 | 7843                    | 975                             | 9                                            | 9                                        | 0                | 1.87.E+09          | 1.83.E+09          | 1.87.E+09          | 1.96.E+09          | 1.69.E+09              | 1.68.E+09              | 1.75.E+09              | 1.64.E+09              |
| 524 | P36776    | Lon protease homolog, mitochondrial [OS=Homo sapiens]                                | 97.4          | 22           | 11         | 422    | 11                | 3509                    | 440                             | 11                                           | 11                                       | 0                | 1.82.E+08          | 1.98.E+08          | 1.78.E+08          | 2.02.E+08          | 1.64.E+08              | 1.64.E+08              | 1.56.E+08              | 1.62.E+08              |
| 525 | P26368    | Splicing factor U2AF 65 kDa subunit [OS=Homo sapiens]                                | 97.4          | 27           | 9          | 362    | 9                 | 5293                    | 645                             | 9                                            | 9                                        | 0                | 5.85.E+08          | 5.17.E+08          | 5.33.E+08          | 4.96.E+08          | 3.89.E+08              | 3.84.E+08              | 3.02.E+08              | 3.61.E+08              |
| 526 | P31930    | Cytochrome b-c1 complex subunit 1, mitochondrial [OS=Homo sapiens]                   | 97.3          | 30           | 9          | 325    | 9                 | 4210                    | 432                             | 9                                            | 9                                        | 0                | 4.09.E+08          | 4.05.E+08          | 4.24.E+08          | 3.95.E+08          | 4.37.E+08              | 4.42.E+08              | 3.96.E+08              | 3.83.E+08              |
| 527 | P49720    | proteasome subunit beta type-3 [OS=Homo sapiens]                                     | 97.0          | 45           | 8          | 328    | 8                 | 6174                    | 398                             | 8                                            | 8                                        | 0                | 4.19.E+08          | 3.74.E+08          | 3.86.E+08          | 3.79.E+08          | 3.84.E+08              | 3.99.E+08              | 3.68.E+08              | 4.04.E+08              |
| 528 | Q15437    | protein transport protein Sec23B [OS=Homo sapiens]                                   | 96.9          | 21           | 12         | 260    | 10                | 2656                    | 210                             | 11                                           | 12                                       | 2                | 2.31.E+08          | 2.44.E+08          | 2.14.E+08          | 2.42.E+08          | 2.61.E+08              | 2.59.E+08              | 2.58.E+08              | 2.36.E+08              |
| 529 | P06132    | Uroporphyrinogen decarboxylase [OS=Homo sapiens]                                     | 96.9          | 51           | 10         | 180    | 10                | 3051                    | 225                             | 10                                           | 9                                        | 0                | 2.51.E+08          | 2.49.E+08          | 2.48.E+08          | 2.23.E+08          | 2.23.E+08              | 2.30.E+08              | 2.31.E+08              | 2.36.E+08              |
| 530 | P04908    | histone H2A type 1-B/E [OS=Homo sapiens]                                             | 96.8          | 58           | 7          | 2068   | 2                 | 22620                   | 2870                            | 7                                            | 7                                        | 5                | 4.00.E+10          | 3.88.E+10          | 4.09.E+10          | 4.06.E+10          | 4.09.E+10              | 4.12.E+10              | 4.44.E+10              | 4.28.E+10              |
| 531 | P62753    | 40S RIBOSOMAL PROTEIN S6 [OS=Homo sapiens]                                           | 96.7          | 26           | 9          | 400    | 9                 | 5334                    | 521                             | 9                                            | 8                                        | 0                | 1.54.E+09          | 1.46.E+09          | 1.52.E+09          | 1.55.E+09          | 1.32.E+09              | 1.28.E+09              | 1.37.E+09              | 1.29.E+09              |
| 532 | P54886    | delta-1-pyrroline-5-carboxylate synthase [OS=Homo sapiens]                           | 96.5          | 23           | 12         | 354    | 12                | 3885                    | 454                             | 12                                           | 12                                       | 0                | 3.16.E+08          | 3.51.E+08          | 3.07.E+08          | 3.49.E+08          | 3.76.E+08              | 4.09.E+08              | 3.32.E+08              | 3.70.E+08              |
| 533 | Q9Y281-1  | Cofilin-2 [OS=Homo sapiens]                                                          | 96.2          | 43           | 8          | 858    | 2                 | 14255                   | 1286                            | 8                                            | 7                                        | 0                | 3.79.E+07          | 4.45.E+07          | 2.01.E+07          | 4.51.E+07          | 6.26.E+07              | 3.23.E+07              | 2.14.E+07              | 5.68.E+07              |
| 534 | P54727    | UV excision repair protein RAD23 homolog B [OS=Homo sapiens]                         | 96.2          | 29           | 8          | 336    | 8                 | 5902                    | 434                             | 8                                            | 8                                        | 0                | 2.51.E+08          | 2.31.E+08          | 2.50.E+08          | 2.80.E+08          | 3.20.E+08              | 3.12.E+08              | 3.31.E+08              | 3.16.E+08              |
| 535 | P30046    | D-dopachrome decarboxylase [OS=Homo sapiens]                                         | 96.2          | 50           | 7          | 432    | 7                 | 7491                    | 443                             | 4                                            | 7                                        | 0                | 1.27.E+09          | 1.22.E+09          | 1.25.E+09          | 1.17.E+09          | 1.18.E+09              | 1.24.E+09              | 1.26.E+09              | 1.22.E+09              |
| 536 | P48047    | ATP synthase subunit O, mitochondrial [OS=Homo sapiens]                              | 96.2          | 45           | 8          | 401    | 8                 | 7561                    | 628                             | 8                                            | 8                                        | 0                | 7.39.E+08          | 6.80.E+08          | 7.50.E+08          | 7.24.E+08          | 8.87.E+08              | 8.80.E+08              | 9.78.E+08              | 9.19.E+08              |
| 537 | P26583    | High mobility group protein B2 [OS=Homo sapiens]                                     | 96.1          | 41           | 9          | 543    | 7                 | 6340                    | 665                             | 9                                            | 9                                        | 0                | 4.73.E+08          | 4.15.E+08          | 4.74.E+08          | 4.35.E+08          | 6.10.E+08              | 5.82.E+08              | 6.29.E+08              | 6.07.E+08              |
| 538 | Q53GQ0    | Very-long-chain 3-oxoacyl-CoA reductase [OS=Homo sapiens]                            | 96.0          | 37           | 9          | 283    | 9                 | 4668                    | 329                             | 9                                            | 9                                        | 0                | 2.44.E+08          | 2.66.E+08          | 2.52.E+08          | 2.78.E+08          | 3.46.E+08              | 3.37.E+08              | 3.15.E+08              | 3.37.E+08              |
| 539 | P17931    | Galectin-3 [OS=Homo sapiens]                                                         | 95.9          | 32           | 7          | 537    | 7                 | 4436                    | 675                             | 7                                            | 7                                        | 0                | 1.36.E+09          | 1.27.E+09          | 1.42.E+09          | 1.39.E+09          | 1.29.E+09              | 1.24.E+09              | 1.41.E+09              | 1.30.E+09              |
| 540 | Q9UHB9    | Signal recognition particle subunit SRP68 [OS=Homo sapiens]                          | 95.2          | 31           | 10         | 252    | 10                | 3626                    | 313                             | 10                                           | 10                                       | 0                | 2.55.E+08          | 2.96.E+08          | 2.27.E+08          | 2.41.E+08          | 3.87.E+08              | 3.59.E+08              | 3.05.E+08              | 3.31.E+08              |
| 541 | P13693    | Translationaly-controlled tumor protein [OS=Homo sapiens]                            | 94.7          | 73           | 10         | 467    | 10                | 4873                    | 740                             | 10                                           | 10                                       | 0                | 5.65.E+08          | 6.17.E+08          | 5.79.E+08          | 5.86.E+08          | 5.74.E+08              | 6.20.E+08              | 5.98.E+08              | 5.88.E+08              |
| 542 | P50502    | Hsc70-interacting protein [OS=Homo sapiens]                                          | 94.1          | 23           | 7          | 415    | 7                 | 5126                    | 607                             | 7                                            | 7                                        | 0                | 1.01.E+09          | 1.02.E+09          | 1.03.E+09          | 9.52.E+08          | 1.31.E+09              | 1.33.E+09              | 1.36.E+09              | 1.32.E+09              |
| 543 | Q96KP4    | cytosolic non-specific dipeptidase [OS=Homo sapiens]                                 | 93.9          | 44           | 12         | 387    | 12                | 5386                    | 555                             | 12                                           | 11                                       | 0                | 2.63.E+08          | 3.43.E+08          | 2.74.E+08          | 3.30.E+08          | 3.89.E+08              | 3.71.E+08              | 3.11.E+08              | 3.43.E+08              |
| 544 | Q9Y230    | RuvB-like 2 [OS=Homo sapiens]                                                        | 93.4          | 34           | 12         | 310    | 12                | 3331                    | 422                             | 11                                           | 12                                       | 0                | 4.57.E+08          | 5.88.E+08          | 5.25.E+08          | 6.00.E+08          | 5.06.E+08              | 4.99.E+08              | 5.04.E+08              | 4.65.E+08              |
| 545 | P20618    | proteasome subunit beta type-1 [OS=Homo sapiens]                                     | 93.3          | 49           | 9          | 342    | 9                 | 3860                    | 373                             | 9                                            | 8                                        | 0                | 5.92.E+08          | 5.55.E+08          | 5.98.E+08          | 6.22.E+08          | 6.33.E+08              | 6.24.E+08              | 6.64.E+08              | 6.33.E+08              |
| 546 | Q13620    | Cullin-4B [OS=Homo sapiens]                                                          | 92.7          | 22           | 16         | 196    | 16                | 2115                    | 155                             | 16                                           | 16                                       | 0                | 1.30.E+08          | 1.57.E+08          | 1.09.E+08          | 1.38.E+08          | 2.49.E+08              | 2.57.E+08              | 1.68.E+08              | 2.52.E+08              |
| 547 | P54920    | alpha-soluble nsf attachment protein [OS=Homo sapiens]                               | 92.7          | 48           | 9          | 153    | 9                 | 1296                    | 167                             | 9                                            | 9                                        | 0                | 3.01.E+08          | 3.07.E+08          | 3.10.E+08          | 3.01.E+08          | 2.36.E+08              | 2.17.E+08              | 2.56.E+08              | 1.88.E+08              |
| 548 | Q07960    | rho GTPase-activating protein 1 [OS=Homo sapiens]                                    | 92.5          | 36           | 9          | 303    | 9                 | 4340                    | 465                             | 9                                            | 8                                        | 0                | 1.66.E+08          | 1.88.E+08          | 1.65.E+08          | 2.08.E+08          | 2.20.E+08              | 2.10.E+08              | 2.26.E+08              | 2.24.E+08              |
| 549 | Q9Y310    | tRNA-splicing ligase RtcB homolog [OS=Homo sapiens]                                  | 92.4          | 26           | 9          | 281    | 9                 | 3825                    | 371                             | 9                                            | 8                                        | 0                | 2.93.E+08          | 3.10.E+08          | 2.91.E+08          | 2.86.E+08          | 2.95.E+08              | 2.95.E+08              | 2.95.E+08              | 2.89.E+08              |
| 550 | Q86V13    | Ras GTPase-activating-like protein IQGAP3 [OS=Homo sapiens]                          | 92.3          | 12           | 14         | 138    | 10                | 1470                    | 101                             | 14                                           | 14                                       | 0                | 2.84.E+07          | 4.14.E+07          | 2.68.E+07          | 4.23.E+07          | 6.89.E+07              | 6.05.E+07              | 5.65.E+07              | 7.76.E+07              |
| 551 | P30048    | Thioredoxin-dependent peroxide reductase, mitochondrial [OS=Homo sapiens]            | 92.1          | 53           | 9          | 516    | 9                 | 4892                    | 743                             | 9                                            | 9                                        | 0                | 1.26.E+09          | 1.21.E+09          | 1.26.E+09          | 1.29.E+09          | 1.77.E+09              | 1.71.E+09              | 1.34.E+09              | 1.67.E+09              |
| 552 | Q14247-1  | Src substrate cortactin [OS=Homo sapiens]                                            | 92.0          | 30           | 12         | 206    | 12                | 4254                    | 311                             | 12                                           | 12                                       | 0                | 2.23.E+08          | 2.39.E+08          | 2.31.E+08          | 2.53.E+08          | 3.75.E+08              | 3.88.E+08              | 3.36.E+08              | 3.72.E+08              |
| 553 | Q9H6S3    | epidermal growth factor receptor kinase substrate 8-like protein 2 [OS=Homo sapiens] | 92.0          | 25           | 8          | 187    | 8                 | 4036                    | 287                             | 8                                            | 8                                        | 0                | 9.51.E+07          | 9.32.E+07          | 8.50.E+07          | 9.63.E+07          | 1.24.E+08              | 1.13.E+08              | 1.20.E+08              | 1.23.E+08              |

| No. | Accession | Description                                                                                                                       | Sum PEP Score | Coverage [%] | # Peptides | # PSMs | # Unique Peptides | Score Mascot: A5 Mascot | Score Sequest HT: A2 Sequest HT | # Peptides (by Search Engine): A2 Sequest HT | # Peptides (by Search Engine): A5 Mascot | # Razor Peptides | ctrl Abundance_s_1 | ctrl Abundance_s_2 | ctrl Abundance_s_3 | ctrl Abundance_s_4 | JAM-A KO Abundance_s_1 | JAM-A KO Abundance_s_2 | JAM-A KO Abundance_s_3 | JAM-A KO Abundance_s_4 |
|-----|-----------|-----------------------------------------------------------------------------------------------------------------------------------|---------------|--------------|------------|--------|-------------------|-------------------------|---------------------------------|----------------------------------------------|------------------------------------------|------------------|--------------------|--------------------|--------------------|--------------------|------------------------|------------------------|------------------------|------------------------|
| 554 | P62191    | 26S proteasome regulatory subunit 4 [OS=Homo sapiens]                                                                             | 91.9          | 37           | 13         | 425    | 12                | 5613                    | 601                             | 13                                           | 13                                       | 1                | 6.26.E+08          | 6.45.E+08          | 6.50.E+08          | 6.52.E+08          | 6.04.E+08              | 6.34.E+08              | 6.69.E+08              | 6.66.E+08              |
| 555 | Q99829    | Copine-1 [OS=Homo sapiens]                                                                                                        | 91.6          | 20           | 7          | 569    | 7                 | 13168                   | 943                             | 6                                            | 7                                        | 0                | 3.76.E+08          | 4.01.E+08          | 3.71.E+08          | 3.97.E+08          | 3.64.E+08              | 3.71.E+08              | 3.19.E+08              | 3.72.E+08              |
| 556 | P28482    | mitogen-activated protein kinase 1 [OS=Homo sapiens]                                                                              | 91.5          | 43           | 11         | 303    | 11                | 1589                    | 325                             | 10                                           | 11                                       | 0                | 5.66.E+08          | 5.46.E+08          | 6.39.E+08          | 5.09.E+08          | 7.60.E+08              | 7.67.E+08              | 8.47.E+08              | 8.22.E+08              |
| 557 | Q13185    | chromobox protein homolog 3 [OS=Homo sapiens]                                                                                     | 91.1          | 54           | 7          | 454    | 5                 | 6401                    | 693                             | 7                                            | 7                                        | 1                | 7.88.E+08          | 7.74.E+08          | 7.74.E+08          | 8.07.E+08          | 7.25.E+08              | 6.83.E+08              | 7.14.E+08              | 7.11.E+08              |
| 558 | P46783    | 40S ribosomal protein S10 [OS=Homo sapiens]                                                                                       | 90.9          | 42           | 7          | 745    | 7                 | 11330                   | 1117                            | 7                                            | 7                                        | 0                | 1.01.E+09          | 1.06.E+09          | 9.99.E+08          | 1.12.E+09          | 1.74.E+09              | 1.69.E+09              | 1.09.E+09              | 1.64.E+09              |
| 559 | P07384    | Calpain-1 catalytic subunit [OS=Homo sapiens]                                                                                     | 90.7          | 25           | 12         | 238    | 12                | 1685                    | 288                             | 12                                           | 12                                       | 0                | 4.41.E+08          | 4.45.E+08          | 4.51.E+08          | 4.01.E+08          | 3.01.E+08              | 3.36.E+08              | 2.60.E+08              | 3.00.E+08              |
| 560 | O14579-1  | coatamer subunit epsilon [OS=Homo sapiens]                                                                                        | 90.5          | 51           | 8          | 105    | 8                 | 2759                    | 184                             | 8                                            | 8                                        | 0                | 9.86.E+07          | 1.14.E+08          | 9.79.E+07          | 1.27.E+08          | 1.34.E+08              | 1.28.E+08              | 1.22.E+08              | 1.41.E+08              |
| 561 | Q31612    | HLA class I histocompatibility antigen, B-73 alpha chain [OS=Homo sapiens]                                                        | 90.2          | 31           | 8          | 334    | 3                 | 4943                    | 455                             | 8                                            | 8                                        | 3                | 1.64.E+08          | 1.75.E+08          | 1.84.E+08          | 1.54.E+08          | 1.90.E+08              | 1.97.E+08              | 2.08.E+08              | 1.88.E+08              |
| 562 | P07858    | Cathepsin B [OS=Homo sapiens]                                                                                                     | 90.0          | 32           | 9          | 499    | 9                 | 7961                    | 699                             | 9                                            | 9                                        | 0                | 9.16.E+08          | 9.04.E+08          | 9.75.E+08          | 8.86.E+08          | 8.54.E+08              | 9.04.E+08              | 9.65.E+08              | 8.85.E+08              |
| 563 | P04080    | Cystatin-B [OS=Homo sapiens]                                                                                                      | 89.8          | 70           | 4          | 465    | 4                 | 6398                    | 696                             | 4                                            | 4                                        | 0                | 1.91.E+09          | 1.80.E+09          | 1.93.E+09          | 1.62.E+09          | 1.39.E+09              | 1.40.E+09              | 1.55.E+09              | 1.51.E+09              |
| 564 | P62333    | 26S proteasome regulatory subunit 10B [OS=Homo sapiens]                                                                           | 89.7          | 38           | 10         | 184    | 10                | 2594                    | 249                             | 10                                           | 10                                       | 0                | 2.54.E+08          | 2.52.E+08          | 2.44.E+08          | 2.75.E+08          | 3.28.E+08              | 2.94.E+08              | 3.23.E+08              | 3.02.E+08              |
| 565 | P78347    | General transcription factor II-1 [OS=Homo sapiens]                                                                               | 89.6          | 17           | 10         | 188    | 10                | 1832                    | 256                             | 10                                           | 10                                       | 0                | 2.28.E+08          | 2.35.E+08          | 2.36.E+08          | 2.43.E+08          | 2.83.E+08              | 2.99.E+08              | 2.68.E+08              | 2.81.E+08              |
| 566 | P50238    | Cysteine-rich protein 1 [OS=Homo sapiens]                                                                                         | 89.3          | 68           | 5          | 662    | 5                 | 3112                    | 755                             | 5                                            | 5                                        | 0                | 4.79.E+09          | 4.22.E+09          | 4.75.E+09          | 5.51.E+09          | 1.75.E+09              | 1.79.E+09              | 2.11.E+09              | 1.85.E+09              |
| 567 | P0CG39    | POTE ankyrin domain family member J [OS=Homo sapiens]                                                                             | 89.2          | 8            | 6          | 1629   | 2                 | 23637                   | 1967                            | 6                                            | 5                                        | 0                | 4.00.E+08          | 4.20.E+08          | 4.43.E+08          | 3.83.E+08          | 5.64.E+08              | 5.44.E+08              | 4.90.E+08              | 5.51.E+08              |
| 568 | P39748    | Flap endonuclease 1 [OS=Homo sapiens]                                                                                             | 89.1          | 37           | 9          | 416    | 9                 | 4474                    | 616                             | 9                                            | 8                                        | 0                | 6.51.E+08          | 6.76.E+08          | 6.52.E+08          | 6.27.E+08          | 7.34.E+08              | 7.39.E+08              | 6.85.E+08              | 6.57.E+08              |
| 569 | O95571    | Persulfide dioxygenase ETHE1, mitochondrial [OS=Homo sapiens]                                                                     | 88.9          | 54           | 7          | 190    | 7                 | 3585                    | 316                             | 7                                            | 7                                        | 0                | 3.07.E+08          | 3.27.E+08          | 2.88.E+08          | 2.94.E+08          | 2.97.E+08              | 2.98.E+08              | 2.63.E+08              | 2.60.E+08              |
| 570 | P38159-1  | RNA-binding motif protein, X chromosome [OS=Homo sapiens]                                                                         | 88.6          | 26           | 10         | 575    | 10                | 5987                    | 524                             | 10                                           | 10                                       | 0                | 8.94.E+08          | 8.75.E+08          | 9.21.E+08          | 9.04.E+08          | 8.66.E+08              | 8.46.E+08              | 9.01.E+08              | 8.86.E+08              |
| 571 | P51149    | ras-related protein Rab-7a [OS=Homo sapiens]                                                                                      | 88.6          | 66           | 11         | 317    | 11                | 2380                    | 451                             | 11                                           | 11                                       | 0                | 6.90.E+08          | 7.08.E+08          | 7.09.E+08          | 6.63.E+08          | 7.41.E+08              | 7.76.E+08              | 6.19.E+08              | 7.41.E+08              |
| 572 | Q04917    | 14-3-3 protein eta [OS=Homo sapiens]                                                                                              | 88.5          | 40           | 12         | 928    | 8                 | 9044                    | 909                             | 12                                           | 12                                       | 0                | 2.11.E+08          | 2.17.E+08          | 2.13.E+08          | 2.28.E+08          | 2.27.E+08              | 2.24.E+08              | 2.20.E+08              | 2.28.E+08              |
| 573 | Q13045-1  | protein flightless-1 homolog [OS=Homo sapiens]                                                                                    | 88.5          | 18           | 13         | 288    | 13                | 3072                    | 317                             | 13                                           | 13                                       | 0                | 2.30.E+08          | 2.40.E+08          | 2.13.E+08          | 2.41.E+08          | 2.02.E+08              | 2.05.E+08              | 1.46.E+08              | 1.82.E+08              |
| 574 | Q9GZT3-1  | SRA stem-loop-interacting RNA-binding protein, mitochondrial [OS=Homo sapiens]                                                    | 88.4          | 78           | 8          | 345    | 8                 | 2701                    | 443                             | 8                                            | 8                                        | 0                | 4.60.E+08          | 4.24.E+08          | 4.53.E+08          | 4.83.E+08          | 5.70.E+08              | 5.47.E+08              | 6.07.E+08              | 5.67.E+08              |
| 575 | Q96HE7    | ERO1-like protein alpha [OS=Homo sapiens]                                                                                         | 88.4          | 37           | 12         | 280    | 12                | 3339                    | 276                             | 12                                           | 12                                       | 0                | 2.56.E+08          | 2.64.E+08          | 2.52.E+08          | 2.45.E+08          | 3.68.E+08              | 3.01.E+08              | 3.09.E+08              | 3.04.E+08              |
| 576 | Q13155    | aminoacyl tRNA synthase complex-interacting multifunctional protein 2 [OS=Homo sapiens]                                           | 88.4          | 52           | 10         | 332    | 10                | 4042                    | 399                             | 10                                           | 10                                       | 0                | 3.02.E+08          | 3.20.E+08          | 3.05.E+08          | 3.24.E+08          | 3.92.E+08              | 3.66.E+08              | 3.35.E+08              | 3.86.E+08              |
| 577 | P20042    | Eukaryotic translation initiation factor 2 subunit 2 [OS=Homo sapiens]                                                            | 88.4          | 42           | 13         | 354    | 13                | 3999                    | 469                             | 13                                           | 12                                       | 0                | 7.35.E+08          | 7.06.E+08          | 7.60.E+08          | 6.91.E+08          | 7.10.E+08              | 7.07.E+08              | 7.35.E+08              | 7.23.E+08              |
| 578 | O75116    | Rho-associated protein kinase 2 [OS=Homo sapiens]                                                                                 | 87.7          | 16           | 15         | 200    | 15                | 1470                    | 196                             | 13                                           | 15                                       | 0                | 2.19.E+08          | 2.55.E+08          | 2.41.E+08          | 2.43.E+08          | 3.51.E+08              | 3.55.E+08              | 3.03.E+08              | 3.48.E+08              |
| 579 | O75694    | nuclear pore complex protein nup155 [OS=Homo sapiens]                                                                             | 87.6          | 12           | 9          | 295    | 9                 | 3209                    | 301                             | 9                                            | 9                                        | 0                | 1.03.E+08          | 1.04.E+08          | 1.37.E+08          | 1.09.E+08          | 1.41.E+08              | 1.84.E+08              | 1.22.E+08              | 1.58.E+08              |
| 580 | P24752    | Acetyl-CoA acetyltransferase, mitochondrial [OS=Homo sapiens]                                                                     | 87.3          | 30           | 8          | 378    | 8                 | 5098                    | 478                             | 8                                            | 8                                        | 0                | 2.59.E+08          | 2.57.E+08          | 2.56.E+08          | 2.66.E+08          | 3.18.E+08              | 3.15.E+08              | 3.13.E+08              | 3.23.E+08              |
| 581 | Q14651    | Plastin-1 [OS=Homo sapiens]                                                                                                       | 87.1          | 18           | 8          | 539    | 4                 | 8881                    | 768                             | 8                                            | 8                                        | 0                | 1.04.E+08          | 1.06.E+08          | 1.05.E+08          | 1.05.E+08          | 1.24.E+08              | 1.15.E+08              | 1.28.E+08              | 1.23.E+08              |
| 582 | Q10567-3  | Isoform C of AP-1 complex subunit beta-1 [OS=Homo sapiens]                                                                        | 87.0          | 18           | 15         | 198    | 5                 | 433                     | 433                             | 15                                           | 0                                        | 1.09.E+08        | 1.16.E+08          | 1.06.E+08          | 1.12.E+08          | 1.09.E+08          | 1.07.E+08              | 0.92.E+07              | 1.04.E+08              |                        |
| 583 | Q8N1F7-1  | Nuclear pore complex protein Nup93 [OS=Homo sapiens]                                                                              | 86.8          | 24           | 10         | 191    | 10                | 4108                    | 279                             | 9                                            | 10                                       | 0                | 1.23.E+08          | 1.29.E+08          | 1.22.E+08          | 1.42.E+08          | 1.74.E+08              | 1.65.E+08              | 1.67.E+08              | 1.74.E+08              |
| 584 | Q9BZ5-4   | Apoptosis inhibitor 5 [OS=Homo sapiens]                                                                                           | 86.8          | 24           | 8          | 269    | 1                 | 6033                    | 398                             | 7                                            | 8                                        | 6                | 2.88.E+08          | 2.76.E+08          | 2.64.E+08          | 2.20.E+08          | 3.07.E+08              | 3.33.E+08              | 3.32.E+08              | 2.94.E+08              |
| 585 | P62244    | 40S ribosomal protein S15a [OS=Homo sapiens]                                                                                      | 86.7          | 67           | 9          | 592    | 9                 | 6342                    | 694                             | 9                                            | 9                                        | 0                | 2.00.E+09          | 1.96.E+09          | 2.12.E+09          | 1.92.E+09          | 1.79.E+09              | 1.68.E+09              | 1.96.E+09              | 1.82.E+09              |
| 586 | Q9NQC3    | Reticulon-4 [OS=Homo sapiens]                                                                                                     | 86.6          | 9            | 5          | 304    | 5                 | 6406                    | 564                             | 5                                            | 5                                        | 0                | 6.08.E+08          | 5.78.E+08          | 6.04.E+08          | 6.18.E+08          | 6.52.E+08              | 6.80.E+08              | 7.62.E+08              | 6.90.E+08              |
| 587 | P30050-1  | 60S ribosomal protein L12 [OS=Homo sapiens]                                                                                       | 86.0          | 55           | 6          | 766    | 6                 | 15694                   | 1288                            | 6                                            | 6                                        | 0                | 1.95.E+09          | 1.88.E+09          | 1.92.E+09          | 1.76.E+09          | 1.79.E+09              | 1.91.E+09              | 1.97.E+09              | 1.94.E+09              |
| 588 | P08754    | Guanine nucleotide-binding protein G(k) subunit alpha [OS=Homo sapiens]                                                           | 86.0          | 47           | 11         | 225    | 8                 | 3084                    | 305                             | 11                                           | 11                                       | 2                | 2.56.E+08          | 2.64.E+08          | 2.62.E+08          | 2.54.E+08          | 2.62.E+08              | 2.82.E+08              | 2.76.E+08              | 2.62.E+08              |
| 589 | P47756-2  | Isoform 2 of F-actin-capping protein subunit beta [OS=Homo sapiens]                                                               | 85.7          | 48           | 10         | 127    | 10                | 421                     | 421                             | 10                                           | 0                                        | 0                | 3.72.E+08          | 3.67.E+08          | 3.71.E+08          | 3.25.E+08          | 4.43.E+08              | 4.57.E+08              | 4.85.E+08              | 4.33.E+08              |
| 590 | Q96A72    | protein mago nashi homolog 2 [OS=Homo sapiens]                                                                                    | 85.5          | 53           | 6          | 250    | 6                 | 1524                    | 373                             | 5                                            | 6                                        | 0                | 4.26.E+08          | 4.62.E+08          | 3.91.E+08          | 3.69.E+08          | 4.33.E+08              | 4.46.E+08              | 5.10.E+08              | 4.21.E+08              |
| 591 | Q15813    | Tubulin-specific chaperone E [OS=Homo sapiens]                                                                                    | 85.5          | 29           | 8          | 281    | 8                 | 4727                    | 301                             | 8                                            | 8                                        | 0                | 2.15.E+08          | 2.12.E+08          | 2.01.E+08          | 2.26.E+08          | 2.72.E+08              | 2.64.E+08              | 2.34.E+08              | 2.66.E+08              |
| 592 | Q09028    | Histone-binding protein RBBP4 [OS=Homo sapiens]                                                                                   | 85.3          | 45           | 10         | 382    | 6                 | 4755                    | 236                             | 9                                            | 10                                       | 0                | 2.80.E+08          | 3.14.E+08          | 2.88.E+08          | 3.07.E+08          | 3.70.E+08              | 3.55.E+08              | 3.37.E+08              | 3.59.E+08              |
| 593 | Q15102    | Platelet-activating factor acetylhydrolase IB subunit gamma [OS=Homo sapiens]                                                     | 85.2          | 56           | 8          | 285    | 8                 | 3989                    | 305                             | 7                                            | 8                                        | 0                | 4.74.E+08          | 4.79.E+08          | 3.80.E+08          | 4.77.E+08          | 3.53.E+08              | 2.98.E+08              | 3.30.E+08              | 2.88.E+08              |
| 594 | P36957    | Dihydropolyllysine-residue succinyltransferase component of 2-oxoglutarate dehydrogenase complex, mitochondrial [OS=Homo sapiens] | 84.8          | 26           | 11         | 450    | 11                | 6222                    | 534                             | 11                                           | 10                                       | 0                | 1.24.E+09          | 1.25.E+09          | 1.23.E+09          | 1.08.E+09          | 1.40.E+09              | 1.41.E+09              | 1.50.E+09              | 1.43.E+09              |
| 595 | Q9ULV4    | coronin-1C [OS=Homo sapiens]                                                                                                      | 84.6          | 38           | 11         | 365    | 11                | 4879                    | 530                             | 11                                           | 11                                       | 0                | 3.65.E+08          | 3.77.E+08          | 3.71.E+08          | 4.53.E+08          | 4.22.E+08              | 4.55.E+08              | 3.95.E+08              | 4.48.E+08              |
| 596 | Q9UNZ2    | NSFL1 cofactor p47 [OS=Homo sapiens]                                                                                              | 84.4          | 29           | 7          | 138    | 7                 | 3139                    | 214                             | 7                                            | 7                                        | 0                | 1.38.E+08          | 1.44.E+08          | 1.38.E+08          | 1.49.E+08          | 1.65.E+08              | 1.73.E+08              | 1.64.E+08              | 1.58.E+08              |
| 597 | Q96C36    | Pyrrrole-5-carboxylate reductase 2 [OS=Homo sapiens]                                                                              | 84.0          | 39           | 7          | 140    | 6                 | 2868                    | 218                             | 6                                            | 7                                        | 0                | 1.51.E+08          | 1.43.E+08          | 1.56.E+08          | 1.50.E+08          | 1.65.E+08              | 1.46.E+08              | 1.66.E+08              | 1.64.E+08              |
| 598 | Q5JWF2-1  | Guanine nucleotide-binding protein G(S) subunit alpha isoforms XLas [OS=Homo sapiens]                                             | 83.9          | 15           | 11         | 385    | 9                 | 4040                    | 361                             | 11                                           | 11                                       | 2                | 5.07.E+08          | 5.09.E+08          | 4.97.E+08          | 4.71.E+08          | 6.59.E+08              | 6.40.E+08              | 6.27.E+08              | 6.53.E+08              |
| 599 | P24666-1  | Low molecular weight phosphotyrosine protein phosphatase [OS=Homo sapiens]                                                        | 83.9          | 61           | 8          | 319    | 8                 | 4620                    | 407                             | 8                                            | 8                                        | 0                | 4.44.E+08          | 4.84.E+08          | 4.77.E+08          | 3.29.E+08          | 5.10.E+08              | 5.04.E+08              | 5.61.E+08              | 5.01.E+08              |
| 600 | P35998    | 26S proteasome regulatory subunit 7 [OS=Homo sapiens]                                                                             | 83.7          | 40           | 13         | 313    | 13                | 2765                    | 331                             | 13                                           | 13                                       | 0                | 2.71.E+08          | 2.67.E+08          | 3.84.E+08          | 2.91.E+08          | 5.87.E+08              | 4.07.E+08              | 4.07.E+08              | 2.97.E+08              |
| 601 | P05386    | 60S acidic ribosomal protein P1 [OS=Homo sapiens]                                                                                 | 83.7          | 80           | 4          | 458    | 4                 | 6999                    | 808                             | 2                                            | 4                                        | 0                | 1.95.E+09          | 1.95.E+09          | 1.96.E+09          | 2.13.E+09          | 1.79.E+09              | 1.72.E+09              | 1.59.E+09              | 1.72.E+09              |
| 602 | P50579    | methionine aminopeptidase 2 [OS=Homo sapiens]                                                                                     | 83.6          | 38           | 10         | 160    | 10                | 1599                    | 184                             | 9                                            | 10                                       | 0                | 1.90.E+08          | 1.91.E+08          | 1.88.E+08          | 1.89.E+08          | 1.69.E+08              | 1.75.E+08              | 1.64.E+08              | 1.54.E+08              |
| 603 | Q9BWD1    | Acetyl-CoA acetyltransferase, cytosolic [OS=Homo sapiens]                                                                         | 83.3          | 41           | 7          | 304    | 7                 | 3687                    | 417                             | 7                                            | 7                                        | 0                | 3.01.E+08          | 3.12.E+08          | 3.10.E+08          | 2.96.E+08          | 3.45.E+08              | 3.52.E+08              | 3.28.E+08              | 3.49.E+08              |
| 604 | P49589-1  | Cysteine-tRNA ligase, cytoplasmic [OS=Homo sapiens]                                                                               | 83.2          | 22           | 13         | 288    | 13                | 1597                    | 357                             | 13                                           | 13                                       | 0                | 3.60.E+08          | 3.44.E+08          | 3.20.E+08          | 3.61.E+08          | 3.53.E+08              | 3.79.E+08              | 3.88.E+08              | 3.62.E+08              |
| 605 | O76021    | Ribosomal L1 domain-containing protein 1 [OS=Homo sapiens]                                                                        | 83.2          | 29           | 12         | 287    | 12                | 3030                    | 324                             | 12                                           | 12                                       | 0                | 4.36.E+08          | 4.43.E+08          | 4.39.E+08          | 4.40.E+08          | 4.12.E+08              | 4.33.E+08              | 3.93.E+08              | 4.26.E+08              |
| 606 | O43242    | 26S proteasome non-ATPase regulatory subunit 3 [OS=Homo sapiens]                                                                  | 83.1          | 28           | 11         | 345    | 11                | 4900                    | 520                             | 11                                           | 10                                       | 0                | 2.89.E+08          | 3.97.E+08          | 2.86.E+08          | 2.94.E+08          | 3.95.E+08              | 3.95.E+08              | 3.38.E+08              | 3.89.E+08              |

| No. | Accession | Description                                                                                        | Sum PEP Score | Coverage [%] | # Peptides | # PSMs | # Unique Peptides | Score Mascot: A5 Mascot | Score Sequest HT: A2 Sequest HT | # Peptides (by Search Engine): A2 Sequest HT | # Peptides (by Search Engine): A5 Mascot | # Razor Peptides | ctrl Abundance_s_1 | ctrl Abundance_s_2 | ctrl Abundance_s_3 | ctrl Abundance_s_4 | JAM-A KO Abundance_s_1 | JAM-A KO Abundance_s_2 | JAM-A KO Abundance_s_3 | JAM-A KO Abundance_s_4 |
|-----|-----------|----------------------------------------------------------------------------------------------------|---------------|--------------|------------|--------|-------------------|-------------------------|---------------------------------|----------------------------------------------|------------------------------------------|------------------|--------------------|--------------------|--------------------|--------------------|------------------------|------------------------|------------------------|------------------------|
| 607 | Q9BX68    | Histidine triad nucleotide-binding protein 2, mitochondrial [OS=Homo sapiens]                      | 82.5          | 58           | 6          | 435    | 6                 | 7251                    | 631                             | 6                                            | 6                                        | 0                | 5.64.E+08          | 5.99.E+08          | 5.59.E+08          | 5.67.E+08          | 8.10.E+08              | 8.27.E+08              | 7.95.E+08              | 7.96.E+08              |
| 608 | P62879    | Guanine nucleotide-binding protein G(I)/G(S)/G(T) subunit beta-2 [OS=Homo sapiens]                 | 82.5          | 54           | 11         | 187    | 7                 | 1805                    | 208                             | 10                                           | 11                                       | 0                | 2.59.E+08          | 2.45.E+08          | 2.51.E+08          | 2.82.E+08          | 3.08.E+08              | 2.69.E+08              | 2.56.E+08              | 2.77.E+08              |
| 609 | Q9P258    | Nucleosome assembly protein 1 [OS=Homo sapiens]                                                    | 82.4          | 23           | 10         | 208    | 10                | 1539                    | 181                             | 10                                           | 9                                        | 0                | 4.66.E+08          | 4.61.E+08          | 4.28.E+08          | 3.76.E+08          | 3.69.E+08              | 3.66.E+08              | 4.04.E+08              | 4.06.E+08              |
| 610 | P54819    | Adenylate kinase 2, mitochondrial [OS=Homo sapiens]                                                | 82.4          | 38           | 6          | 356    | 6                 | 8235                    | 598                             | 5                                            | 5                                        | 0                | 3.23.E+08          | 3.44.E+08          | 3.61.E+08          | 4.16.E+08          | 2.62.E+08              | 2.47.E+08              | 2.36.E+08              | 2.41.E+08              |
| 611 | P18031    | Tyrosine-protein phosphatase non-receptor type 1 [OS=Homo sapiens]                                 | 82.1          | 29           | 10         | 171    | 10                | 1454                    | 226                             | 10                                           | 10                                       | 0                | 2.62.E+08          | 2.64.E+08          | 2.86.E+08          | 2.62.E+08          | 4.64.E+08              | 4.31.E+08              | 4.67.E+08              | 4.57.E+08              |
| 612 | O15144    | Actin-related protein 2/3 complex subunit 2 [OS=Homo sapiens]                                      | 82.1          | 27           | 6          | 239    | 6                 | 2959                    | 347                             | 6                                            | 6                                        | 0                | 2.79.E+08          | 2.47.E+08          | 2.26.E+08          | 2.63.E+08          | 2.81.E+08              | 2.47.E+08              | 2.70.E+08              | 2.99.E+08              |
| 613 | P30740    | Leukocyte elastase inhibitor [OS=Homo sapiens]                                                     | 82.0          | 31           | 7          | 129    | 7                 | 1534                    | 158                             | 7                                            | 7                                        | 0                | 1.76.E+08          | 1.73.E+08          | 1.91.E+08          | 1.94.E+08          | 1.18.E+08              | 1.12.E+08              | 9.89.E+07              | 1.13.E+08              |
| 614 | Q9H9B4    | Sideroflexin-1 [OS=Homo sapiens]                                                                   | 81.9          | 41           | 9          | 254    | 7                 | 3278                    | 279                             | 9                                            | 8                                        | 2                | 3.94.E+08          | 3.79.E+08          | 3.88.E+08          | 3.78.E+08          | 3.59.E+08              | 3.43.E+08              | 3.38.E+08              | 3.58.E+08              |
| 615 | Q9H2U2    | Inorganic pyrophosphatase 2, mitochondrial [OS=Homo sapiens]                                       | 81.7          | 31           | 8          | 400    | 7                 | 5158                    | 359                             | 8                                            | 8                                        | 0                | 2.19.E+08          | 2.65.E+08          | 1.65.E+08          | 2.12.E+08          | 3.17.E+08              | 3.08.E+08              | 2.78.E+08              | 3.01.E+08              |
| 616 | Q9BR76    | Coronin-1B [OS=Homo sapiens]                                                                       | 81.6          | 31           | 10         | 346    | 10                | 6025                    | 555                             | 10                                           | 10                                       | 0                | 5.24.E+08          | 5.05.E+08          | 5.18.E+08          | 4.95.E+08          | 5.88.E+08              | 5.83.E+08              | 5.33.E+08              | 5.61.E+08              |
| 617 | P62195-1  | 26S proteasome regulatory subunit 8 [OS=Homo sapiens]                                              | 81.6          | 31           | 9          | 384    | 8                 | 3279                    | 484                             | 9                                            | 9                                        | 0                | 3.95.E+08          | 4.23.E+08          | 3.76.E+08          | 3.51.E+08          | 4.15.E+08              | 4.25.E+08              | 3.72.E+08              | 4.04.E+08              |
| 618 | P62888    | 60S ribosomal protein L30 [OS=Homo sapiens]                                                        | 81.5          | 57           | 5          | 439    | 4                 | 8801                    | 793                             | 5                                            | 4                                        | 0                | 1.03.E+09          | 1.02.E+09          | 1.06.E+09          | 1.03.E+09          | 9.22.E+08              | 9.25.E+08              | 9.49.E+08              | 8.97.E+08              |
| 619 | O43809    | Cleavage and polyadenylation specificity factor subunit 5 [OS=Homo sapiens]                        | 81.4          | 52           | 8          | 429    | 8                 | 4381                    | 530                             | 8                                            | 8                                        | 0                | 3.78.E+08          | 4.02.E+08          | 3.83.E+08          | 3.89.E+08          | 4.77.E+08              | 4.95.E+08              | 4.81.E+08              | 4.94.E+08              |
| 620 | Q12904-1  | aminoacyl tRNA synthase complex-interacting multifunctional protein 1 [OS=Homo sapiens]            | 81.4          | 37           | 9          | 220    | 9                 | 1764                    | 258                             | 9                                            | 9                                        | 0                | 3.38.E+08          | 4.43.E+08          | 3.76.E+08          | 4.62.E+08          | 4.07.E+08              | 5.21.E+08              | 5.47.E+08              | 5.25.E+08              |
| 621 | P39019    | 40S ribosomal protein S19 [OS=Homo sapiens]                                                        | 80.6          | 50           | 11         | 741    | 11                | 7331                    | 831                             | 10                                           | 11                                       | 0                | 2.65.E+09          | 2.53.E+09          | 2.70.E+09          | 2.34.E+09          | 2.30.E+09              | 2.34.E+09              | 2.62.E+09              | 2.47.E+09              |
| 622 | E9PAV3    | Nascent polypeptide-associated complex subunit alpha, muscle-specific form [OS=Homo sapiens]       | 80.4          | 3            | 6          | 476    | 6                 | 8117                    | 763                             | 6                                            | 6                                        | 0                | 1.04.E+09          | 1.10.E+09          | 1.05.E+09          | 9.95.E+08          | 9.73.E+08              | 9.85.E+08              | 9.94.E+08              | 9.78.E+08              |
| 623 | P49915    | GMP synthase [glutamine-hydrolyzing] [OS=Homo sapiens]                                             | 80.4          | 23           | 9          | 189    | 9                 | 2540                    | 225                             | 9                                            | 9                                        | 0                | 1.72.E+08          | 1.87.E+08          | 1.78.E+08          | 2.03.E+08          | 2.06.E+08              | 1.81.E+08              | 1.81.E+08              | 1.86.E+08              |
| 624 | P00533-1  | epidermal growth factor receptor [OS=Homo sapiens]                                                 | 80.4          | 14           | 13         | 200    | 13                | 2497                    | 244                             | 13                                           | 13                                       | 0                | 3.57.E+08          | 3.72.E+08          | 3.71.E+08          | 3.55.E+08          | 3.37.E+08              | 3.60.E+08              | 3.47.E+08              | 3.65.E+08              |
| 625 | Q9Y446    | Plakophilin-3 [OS=Homo sapiens]                                                                    | 80.2          | 21           | 11         | 172    | 11                | 1242                    | 130                             | 11                                           | 11                                       | 0                | 2.64.E+08          | 2.34.E+08          | 2.57.E+08          | 2.58.E+08          | 8.73.E+07              | 1.14.E+08              | 9.50.E+07              | 1.08.E+08              |
| 626 | P55263-1  | Adenosine kinase [OS=Homo sapiens]                                                                 | 79.8          | 53           | 11         | 239    | 11                | 3608                    | 303                             | 11                                           | 11                                       | 0                | 3.41.E+08          | 3.11.E+08          | 2.32.E+08          | 2.37.E+08          | 3.21.E+08              | 3.41.E+08              | 4.11.E+08              | 2.92.E+08              |
| 627 | P62269    | 40S ribosomal protein S18 [OS=Homo sapiens]                                                        | 79.7          | 59           | 13         | 771    | 13                | 7403                    | 733                             | 12                                           | 11                                       | 0                | 3.20.E+09          | 3.12.E+09          | 3.19.E+09          | 3.16.E+09          | 2.56.E+09              | 2.58.E+09              | 2.71.E+09              | 2.60.E+09              |
| 628 | Q6DKJ4    | nucleoredoxin [OS=Homo sapiens]                                                                    | 79.5          | 36           | 9          | 239    | 9                 | 3028                    | 241                             | 7                                            | 9                                        | 0                | 2.72.E+08          | 2.68.E+08          | 2.45.E+08          | 2.25.E+08          | 1.65.E+08              | 1.67.E+08              | 1.61.E+08              | 1.72.E+08              |
| 629 | Q15165-1  | Isoform 1 of Serum paraoxonase/arylesterase 2 [OS=Homo sapiens]                                    | 79.4          | 51           | 8          | 246    | 8                 |                         | 679                             | 8                                            | 8                                        | 0                | 4.77.E+08          | 5.00.E+08          | 4.80.E+08          | 4.17.E+08          | 9.29.E+08              | 9.13.E+08              | 9.41.E+08              | 9.25.E+08              |
| 630 | O00303    | Eukaryotic translation initiation factor 3 subunit F [OS=Homo sapiens]                             | 79.1          | 23           | 6          | 236    | 6                 | 4605                    | 394                             | 6                                            | 6                                        | 0                | 2.31.E+08          | 2.33.E+08          | 2.30.E+08          | 2.58.E+08          | 2.82.E+08              | 2.62.E+08              | 2.38.E+08              | 2.93.E+08              |
| 631 | Q13435    | Splicing factor 3b subunit 2 [OS=Homo sapiens]                                                     | 79.1          | 17           | 11         | 183    | 11                | 1784                    | 171                             | 10                                           | 10                                       | 0                | 3.66.E+08          | 3.67.E+08          | 3.71.E+08          | 3.74.E+08          | 3.80.E+08              | 3.75.E+08              | 3.57.E+08              | 3.88.E+08              |
| 632 | P39656    | Dolichyl-diphosphooligosaccharide--protein glycosyltransferase 48 kDa subunit [OS=Homo sapiens]    | 79.1          | 39           | 11         | 314    | 11                | 1682                    | 340                             | 11                                           | 11                                       | 0                | 2.53.E+09          | 8.78.E+08          | 2.72.E+09          | 7.61.E+08          | 2.94.E+09              | 2.89.E+09              | 3.00.E+09              | 2.94.E+09              |
| 633 | P09622    | Dihydropolyl dehydrogenase, mitochondrial [OS=Homo sapiens]                                        | 78.9          | 23           | 7          | 303    | 7                 | 5116                    | 409                             | 7                                            | 7                                        | 0                | 3.57.E+08          | 3.31.E+08          | 3.59.E+08          | 3.59.E+08          | 3.68.E+08              | 4.00.E+08              | 3.87.E+08              | 3.78.E+08              |
| 634 | P62820    | Ras-related protein Rab-1A [OS=Homo sapiens]                                                       | 78.6          | 58           | 9          | 642    | 2                 | 10053                   | 873                             | 9                                            | 9                                        | 0                | 6.48.E+07          | 4.79.E+07          | 5.43.E+07          | 5.89.E+07          | 8.37.E+07              | 6.91.E+07              | 5.91.E+07              | 8.25.E+07              |
| 635 | P43034    | Platelet-activating factor acetylhydrolase 1B subunit alpha [OS=Homo sapiens]                      | 78.6          | 29           | 9          | 185    | 8                 | 1867                    | 202                             | 9                                            | 9                                        | 1                | 3.36.E+08          | 3.29.E+08          | 2.99.E+08          | 3.56.E+08          | 2.50.E+08              | 2.47.E+08              | 2.41.E+08              | 2.48.E+08              |
| 636 | O43399    | Tumor protein D54 [OS=Homo sapiens]                                                                | 78.4          | 54           | 6          | 358    | 6                 | 4038                    | 715                             | 6                                            | 6                                        | 0                | 7.10.E+08          | 7.20.E+08          | 6.82.E+08          | 6.72.E+08          | 6.08.E+08              | 5.89.E+08              | 5.66.E+08              | 5.64.E+08              |
| 637 | P16422    | Epithelial cell adhesion molecule [OS=Homo sapiens]                                                | 77.7          | 34           | 7          | 321    | 7                 | 7057                    | 550                             | 7                                            | 6                                        | 0                | 2.04.E+08          | 2.27.E+08          | 2.12.E+08          | 2.05.E+08          | 1.70.E+08              | 2.00.E+08              | 1.80.E+08              | 2.03.E+08              |
| 638 | P28074-1  | proteasome subunit beta type-5 [OS=Homo sapiens]                                                   | 77.3          | 40           | 8          | 224    | 8                 | 2738                    | 325                             | 8                                            | 8                                        | 0                | 8.27.E+08          | 8.65.E+08          | 8.19.E+08          | 7.71.E+08          | 8.33.E+08              | 7.68.E+08              | 9.58.E+08              | 7.07.E+08              |
| 639 | P35520-1  | Cystathionine beta-synthase [OS=Homo sapiens]                                                      | 77.1          | 35           | 11         | 218    | 11                | 1168                    | 224                             | 10                                           | 11                                       | 0                | 3.77.E+08          | 3.26.E+08          | 3.28.E+08          | 3.38.E+08          | 3.57.E+08              | 2.82.E+08              | 3.53.E+08              | 2.88.E+08              |
| 640 | Q13347    | Eukaryotic translation initiation factor 3 subunit I [OS=Homo sapiens]                             | 77.1          | 51           | 11         | 339    | 11                | 3392                    | 409                             | 11                                           | 11                                       | 0                | 5.04.E+08          | 5.05.E+08          | 4.75.E+08          | 5.06.E+08          | 4.97.E+08              | 5.24.E+08              | 4.91.E+08              | 5.01.E+08              |
| 641 | Q9NVP1    | ATP-dependent RNA helicase DDX18 [OS=Homo sapiens]                                                 | 76.4          | 23           | 9          | 218    | 9                 | 1554                    | 227                             | 9                                            | 9                                        | 0                | 1.75.E+08          | 2.07.E+08          | 2.98.E+08          | 1.66.E+08          | 1.85.E+08              | 2.08.E+08              | 1.47.E+08              | 2.10.E+08              |
| 642 | Q9Y4G6    | Talin-2 [OS=Homo sapiens]                                                                          | 76.4          | 4            | 9          | 370    | 2                 | 3739                    | 597                             | 9                                            | 9                                        | 0                | 3.50.E+06          | 2.66.E+06          | 4.13.E+06          | 3.84.E+06          | 3.69.E+06              | 3.31.E+06              | 2.39.E+06              | 1.81.E+06              |
| 643 | P11498    | pyruvate carboxylase, mitochondrial [OS=Homo sapiens]                                              | 76.3          | 16           | 13         | 242    | 13                | 2176                    | 261                             | 13                                           | 13                                       | 0                | 4.29.E+08          | 4.04.E+08          | 3.86.E+08          | 4.33.E+08          | 3.95.E+08              | 3.76.E+08              | 4.00.E+08              | 3.78.E+08              |
| 644 | P50995    | annexin A11 [OS=Homo sapiens]                                                                      | 75.7          | 18           | 8          | 245    | 8                 | 2642                    | 299                             | 8                                            | 8                                        | 0                | 2.47.E+08          | 3.03.E+08          | 2.06.E+08          | 2.75.E+08          | 1.44.E+08              | 1.76.E+08              | 1.45.E+08              | 1.77.E+08              |
| 645 | P20674    | Cytochrome c oxidase subunit 5A, mitochondrial [OS=Homo sapiens]                                   | 75.6          | 58           | 7          | 431    | 7                 | 3714                    | 688                             | 7                                            | 7                                        | 0                | 8.01.E+08          | 8.20.E+08          | 8.12.E+08          | 8.64.E+08          | 6.09.E+08              | 6.06.E+08              | 6.05.E+08              | 6.92.E+08              |
| 646 | Q07955-1  | Serine/arginine-rich splicing factor 1 [OS=Homo sapiens]                                           | 75.5          | 40           | 9          | 483    | 9                 | 3554                    | 629                             | 9                                            | 9                                        | 0                | 8.08.E+08          | 7.74.E+08          | 8.79.E+08          | 7.77.E+08          | 1.02.E+09              | 9.00.E+08              | 8.99.E+08              | 8.26.E+08              |
| 647 | P53396-1  | ATP-citrate synthase [OS=Homo sapiens]                                                             | 75.2          | 12           | 10         | 303    | 10                | 4358                    | 326                             | 10                                           | 9                                        | 0                | 3.22.E+08          | 3.13.E+08          | 3.05.E+08          | 3.46.E+08          | 6.29.E+08              | 6.09.E+08              | 6.09.E+08              | 5.92.E+08              |
| 648 | P49773    | Histidine triad nucleotide-binding protein 1 [OS=Homo sapiens]                                     | 74.5          | 71           | 5          | 203    | 5                 | 604                     | 265                             | 5                                            | 5                                        | 0                | 5.59.E+08          | 5.58.E+08          | 5.41.E+08          | 5.40.E+08          | 5.10.E+08              | 5.22.E+08              | 5.21.E+08              | 5.33.E+08              |
| 649 | P42224-1  | Signal transducer and activator of transcription 1-alpha/beta [OS=Homo sapiens]                    | 74.5          | 18           | 10         | 123    | 10                | 1290                    | 158                             | 10                                           | 10                                       | 0                | 1.89.E+08          | 2.08.E+08          | 2.08.E+08          | 2.22.E+08          | 3.12.E+08              | 3.26.E+08              | 2.49.E+08              | 3.10.E+08              |
| 650 | Q9NTK5-1  | obg-like ATPase 1 [OS=Homo sapiens]                                                                | 74.4          | 43           | 9          | 347    | 9                 | 5399                    | 475                             | 9                                            | 9                                        | 0                | 4.11.E+08          | 4.63.E+08          | 4.27.E+08          | 4.63.E+08          | 5.49.E+08              | 5.03.E+08              | 4.27.E+08              | 5.23.E+08              |
| 651 | P61604    | 10 kDa heat shock protein, mitochondrial [OS=Homo sapiens]                                         | 74.3          | 67           | 9          | 934    | 9                 | 11794                   | 1058                            | 9                                            | 9                                        | 0                | 3.79.E+09          | 3.82.E+09          | 3.87.E+09          | 3.60.E+09          | 4.32.E+09              | 4.42.E+09              | 4.51.E+09              | 4.44.E+09              |
| 652 | P30154    | Serine/threonine-protein phosphatase 2A 65 kDa regulatory subunit A beta isoform [OS=Homo sapiens] | 74.3          | 11           | 5          | 392    | 1                 | 9782                    | 677                             | 5                                            | 5                                        | 0                |                    |                    |                    |                    |                        |                        |                        |                        |
| 653 | O14773    | Tripeptidyl-peptidase 1 [OS=Homo sapiens]                                                          | 74.0          | 25           | 7          | 230    | 7                 | 3304                    | 353                             | 6                                            | 7                                        | 0                | 1.92.E+08          | 2.07.E+08          | 2.15.E+08          | 1.99.E+08          | 4.14.E+08              | 4.57.E+08              | 4.68.E+08              | 4.14.E+08              |
| 654 | P50897    | Palmitoyl-protein thioesterase 1 [OS=Homo sapiens]                                                 | 74.0          | 42           | 7          | 185    | 7                 | 3226                    | 260                             | 7                                            | 7                                        | 0                | 2.90.E+08          | 3.03.E+08          | 2.64.E+08          | 2.65.E+08          | 3.31.E+08              | 3.51.E+08              | 2.68.E+08              | 3.27.E+08              |
| 655 | Q16836-1  | Hydroxyacyl-coenzyme A dehydrogenase, mitochondrial [OS=Homo sapiens]                              | 73.7          | 46           | 8          | 414    | 8                 | 6026                    | 516                             | 8                                            | 7                                        | 0                | 4.77.E+08          | 4.99.E+08          | 4.89.E+08          | 4.92.E+08          | 4.53.E+08              | 4.67.E+08              | 4.26.E+08              | 4.73.E+08              |
| 656 | P53582    | Methionine aminopeptidase 1 [OS=Homo sapiens]                                                      | 73.5          | 41           | 8          | 176    | 8                 | 1193                    | 202                             | 8                                            | 8                                        | 0                | 2.53.E+08          | 2.37.E+08          | 2.21.E+08          | 2.45.E+08          | 2.67.E+08              | 2.88.E+08              | 2.80.E+08              | 3.02.E+08              |



| No. | Accession | Description                                                            | Sum PEP Score | Coverage [%] | # Peptides | # PSMs | # Unique Peptides | Score Mascot: A5 Mascot | Score Sequest HT: A2 Sequest HT | # Peptides (by Search Engine): A2 Sequest HT | # Peptides (by Search Engine): A5 Mascot | # Razor Peptides | ctrl Abundance_s_1 | ctrl Abundance_s_2 | ctrl Abundance_s_3 | ctrl Abundance_s_4 | JAM-A KO Abundance_s_1 | JAM-A KO Abundance_s_2 | JAM-A KO Abundance_s_3 | JAM-A KO Abundance_s_4 |
|-----|-----------|------------------------------------------------------------------------|---------------|--------------|------------|--------|-------------------|-------------------------|---------------------------------|----------------------------------------------|------------------------------------------|------------------|--------------------|--------------------|--------------------|--------------------|------------------------|------------------------|------------------------|------------------------|
| 657 | Q9Y2W1    | Thyroid hormone receptor-associated protein 3 [OS=Homo sapiens]        | 73.3          | 12           | 9          | 183    | 9                 | 1714                    | 211                             | 9                                            | 9                                        | 0                | 2.37.E+08          | 2.26.E+08          | 2.41.E+08          | 2.55.E+08          | 3.31.E+08              | 2.89.E+08              | 3.41.E+08              | 3.15.E+08              |
| 658 | P35268    | 60S ribosomal protein L22 [OS=Homo sapiens]                            | 73.1          | 48           | 6          | 369    | 6                 | 8113                    | 678                             | 6                                            | 6                                        | 0                | 1.27.E+09          | 1.24.E+09          | 1.26.E+09          | 1.31.E+09          | 1.00.E+09              | 9.56.E+08              | 1.01.E+09              | 9.72.E+08              |
| 659 | Q9H3K6-1  | bola-like protein 2 [OS=Homo sapiens]                                  | 73.0          | 80           | 6          | 306    | 6                 | 2620                    | 412                             | 6                                            | 6                                        | 0                | 4.78.E+08          | 5.50.E+08          | 5.78.E+08          | 5.75.E+08          | 4.34.E+08              | 4.33.E+08              | 4.66.E+08              | 5.12.E+08              |
| 660 | O00629    | Importin subunit alpha-3 [OS=Homo sapiens]                             | 72.9          | 25           | 7          | 181    | 4                 | 2754                    | 238                             | 7                                            | 6                                        | 2                | 8.53.E+07          | 9.24.E+07          | 7.26.E+07          | 7.44.E+07          | 9.45.E+07              | 9.13.E+07              | 8.25.E+07              | 8.37.E+07              |
| 661 | Q12931    | heat shock protein 75 kDa, mitochondrial [OS=Homo sapiens]             | 72.7          | 17           | 9          | 293    | 8                 | 5906                    | 452                             | 9                                            | 9                                        | 0                | 2.09.E+08          | 1.37.E+08          | 1.32.E+08          | 1.58.E+08          | 1.04.E+08              | 1.72.E+08              | 1.79.E+08              | 1.06.E+08              |
| 662 | Q96AG4    | Leucine-rich repeat-containing protein 59 [OS=Homo sapiens]            | 72.7          | 39           | 8          | 357    | 8                 | 2125                    | 475                             | 8                                            | 8                                        | 0                | 6.29.E+08          | 6.39.E+08          | 6.55.E+08          | 5.95.E+08          | 9.63.E+08              | 1.05.E+09              | 6.27.E+08              | 9.76.E+08              |
| 663 | Q8WX93-1  | palladin [OS=Homo sapiens]                                             | 72.6          | 17           | 12         | 258    | 12                | 1529                    | 336                             | 12                                           | 12                                       | 0                | 3.00.E+08          | 3.10.E+08          | 2.58.E+08          | 3.06.E+08          | 3.63.E+08              | 3.92.E+08              | 3.34.E+08              | 4.04.E+08              |
| 664 | P14324    | Farnesyl pyrophosphate synthase [OS=Homo sapiens]                      | 72.5          | 29           | 8          | 215    | 8                 | 1692                    | 263                             | 8                                            | 8                                        | 0                | 3.41.E+08          | 3.54.E+08          | 3.38.E+08          | 3.16.E+08          | 2.96.E+08              | 2.85.E+08              | 2.92.E+08              | 2.99.E+08              |
| 665 | P62913    | 60S ribosomal protein L11 [OS=Homo sapiens]                            | 72.3          | 51           | 10         | 456    | 10                | 5348                    | 478                             | 9                                            | 10                                       | 0                | 1.48.E+09          | 1.48.E+09          | 1.51.E+09          | 1.38.E+09          | 1.45.E+09              | 1.45.E+09              | 1.51.E+09              | 1.48.E+09              |
| 666 | P31689-1  | DnaJ homolog subfamily A member 1 [OS=Homo sapiens]                    | 72.3          | 35           | 8          | 180    | 8                 | 2412                    | 244                             | 7                                            | 8                                        | 0                | 1.89.E+08          | 2.00.E+08          | 1.86.E+08          | 1.95.E+08          | 2.10.E+08              | 2.20.E+08              | 2.05.E+08              | 2.03.E+08              |
| 667 | O06084    | Importin subunit alpha-7 [OS=Homo sapiens]                             | 72.3          | 27           | 7          | 236    | 4                 | 3010                    | 233                             | 7                                            | 7                                        | 3                | 1.41.E+08          | 1.45.E+08          | 1.35.E+08          | 1.48.E+08          | 1.76.E+08              | 1.78.E+08              | 1.50.E+08              | 1.57.E+08              |
| 668 | Q15758-1  | Neutral amino acid transporter B(0) [OS=Homo sapiens]                  | 71.9          | 26           | 10         | 446    | 10                | 7922                    | 603                             | 10                                           | 10                                       | 0                | 5.03.E+08          | 7.29.E+08          | 6.86.E+08          | 8.51.E+08          | 5.73.E+08              | 3.78.E+08              | 5.74.E+08              | 5.85.E+08              |
| 669 | Q8N163-1  | Cell cycle and apoptosis regulator protein 2 [OS=Homo sapiens]         | 71.9          | 22           | 11         | 227    | 11                | 1841                    | 222                             | 11                                           | 11                                       | 0                | 2.38.E+08          | 2.60.E+08          | 2.26.E+08          | 2.95.E+08          | 2.94.E+08              | 3.05.E+08              | 2.58.E+08              | 2.93.E+08              |
| 670 | P84098    | 60S ribosomal protein L19 [OS=Homo sapiens]                            | 71.8          | 27           | 7          | 396    | 7                 | 6971                    | 504                             | 7                                            | 7                                        | 0                | 5.88.E+08          | 5.20.E+08          | 5.97.E+08          | 6.13.E+08          | 4.13.E+08              | 4.24.E+08              | 4.92.E+08              | 4.50.E+08              |
| 671 | Q15907    | Ras-related protein Rab-11B [OS=Homo sapiens]                          | 71.8          | 54           | 10         | 391    | 10                | 5556                    | 547                             | 9                                            | 10                                       | 0                | 1.29.E+09          | 1.30.E+09          | 1.33.E+09          | 1.36.E+09          | 1.51.E+09              | 1.62.E+09              | 1.63.E+09              | 1.62.E+09              |
| 672 | P23919    | thymidylate kinase [OS=Homo sapiens]                                   | 71.7          | 59           | 10         | 305    | 10                | 2774                    | 388                             | 10                                           | 10                                       | 0                | 6.25.E+08          | 5.94.E+08          | 6.48.E+08          | 6.22.E+08          | 7.67.E+08              | 6.58.E+08              | 7.01.E+08              | 6.91.E+08              |
| 673 | Q15436    | protein transport protein Sec23A [OS=Homo sapiens]                     | 71.6          | 19           | 8          | 101    | 6                 | 2111                    | 160                             | 7                                            | 8                                        | 0                | 6.58.E+07          | 7.35.E+07          | 6.52.E+07          | 5.22.E+07          | 9.81.E+07              | 1.02.E+08              | 8.65.E+07              | 1.11.E+08              |
| 674 | Q96PK6-1  | RNA-binding protein 14 [OS=Homo sapiens]                               | 71.6          | 20           | 10         | 335    | 10                | 4143                    | 436                             | 10                                           | 10                                       | 0                | 3.66.E+08          | 3.47.E+08          | 4.00.E+08          | 3.80.E+08          | 3.86.E+08              | 4.51.E+08              | 3.94.E+08              | 3.76.E+08              |
| 675 | P28288    | ATP-binding cassette sub-family D member 3 [OS=Homo sapiens]           | 71.6          | 19           | 8          | 210    | 8                 | 1825                    | 212                             | 8                                            | 8                                        | 0                | 1.37.E+08          | 1.50.E+08          | 1.26.E+08          | 1.41.E+08          | 2.51.E+08              | 2.40.E+08              | 2.26.E+08              | 2.40.E+08              |
| 676 | O95994    | Anterior gradient protein 2 homolog [OS=Homo sapiens]                  | 71.5          | 43           | 7          | 204    | 7                 | 1880                    | 253                             | 7                                            | 7                                        | 0                | 2.64.E+08          | 2.99.E+08          | 2.75.E+08          | 2.63.E+08          | 2.76.E+08              | 3.08.E+08              | 2.97.E+08              | 2.89.E+08              |
| 677 | Q99439    | Calponin-2 [OS=Homo sapiens]                                           | 71.3          | 35           | 9          | 221    | 8                 | 1927                    | 226                             | 8                                            | 9                                        | 1                | 3.94.E+08          | 3.84.E+08          | 4.05.E+08          | 4.19.E+08          | 7.85.E+08              | 7.52.E+08              | 7.53.E+08              | 7.63.E+08              |
| 678 | P00367    | Glutamate dehydrogenase 1, mitochondrial [OS=Homo sapiens]             | 71.3          | 25           | 9          | 192    | 9                 | 2002                    | 250                             | 9                                            | 8                                        | 0                | 2.95.E+08          | 3.18.E+08          | 3.03.E+08          | 2.85.E+08          | 2.56.E+08              | 2.46.E+08              | 2.57.E+08              | 2.38.E+08              |
| 679 | P62280    | 40S ribosomal protein S11 [OS=Homo sapiens]                            | 71.2          | 58           | 13         | 593    | 13                | 4207                    | 622                             | 13                                           | 13                                       | 0                | 2.23.E+09          | 1.99.E+09          | 2.16.E+09          | 2.29.E+09          | 1.82.E+09              | 1.82.E+09              | 1.94.E+09              | 1.85.E+09              |
| 680 | O75947-1  | ATP synthase subunit d, mitochondrial [OS=Homo sapiens]                | 71.2          | 73           | 8          | 465    | 8                 | 5259                    | 543                             | 8                                            | 8                                        | 0                | 6.11.E+08          | 6.31.E+08          | 5.95.E+08          | 6.43.E+08          | 5.99.E+08              | 6.34.E+08              | 5.30.E+08              | 5.93.E+08              |
| 681 | O60832-1  | H/ACA ribonucleoprotein complex subunit 4 [OS=Homo sapiens]            | 71.0          | 23           | 8          | 222    | 8                 | 1486                    | 261                             | 8                                            | 8                                        | 0                | 1.82.E+08          | 2.27.E+08          | 1.77.E+08          | 1.92.E+08          | 1.91.E+08              | 1.82.E+08              | 1.91.E+08              | 1.89.E+08              |
| 682 | O00232-1  | 26S proteasome non-atpase regulatory subunit 12 [OS=Homo sapiens]      | 70.8          | 34           | 10         | 285    | 9                 | 3887                    | 368                             | 10                                           | 9                                        | 1                | 4.48.E+08          | 4.78.E+08          | 4.29.E+08          | 4.96.E+08          | 4.33.E+08              | 4.66.E+08              | 4.28.E+08              | 4.01.E+08              |
| 683 | O43852    | Calumenin [OS=Homo sapiens]                                            | 70.5          | 40           | 9          | 259    | 9                 | 1770                    | 291                             | 8                                            | 9                                        | 0                | 2.18.E+08          | 2.21.E+08          | 2.17.E+08          | 2.11.E+08          | 3.36.E+08              | 3.23.E+08              | 3.33.E+08              | 2.95.E+08              |
| 684 | P51659-1  | peroxisomal multifunctional enzyme type 2 [OS=Homo sapiens]            | 70.3          | 25           | 9          | 122    | 9                 | 1662                    | 153                             | 9                                            | 9                                        | 0                | 1.80.E+08          | 1.45.E+08          | 1.53.E+08          | 1.83.E+08          | 2.34.E+08              | 2.19.E+08              | 1.67.E+08              | 2.28.E+08              |
| 685 | O00231    | 26S proteasome non-ATPase regulatory subunit 11 [OS=Homo sapiens]      | 70.3          | 32           | 13         | 369    | 13                | 3351                    | 411                             | 12                                           | 13                                       | 0                | 6.26.E+08          | 6.23.E+08          | 6.55.E+08          | 5.90.E+08          | 6.89.E+08              | 6.76.E+08              | 6.16.E+08              | 6.86.E+08              |
| 686 | P06737-1  | Glycogen phosphorylase, liver form [OS=Homo sapiens]                   | 70.2          | 18           | 11         | 147    | 9                 | 2413                    | 161                             | 11                                           | 10                                       | 0                | 2.68.E+08          | 2.69.E+08          | 2.53.E+08          | 2.62.E+08          | 4.13.E+08              | 4.06.E+08              | 4.01.E+08              | 4.13.E+08              |
| 687 | Q92817    | Envoplakin [OS=Homo sapiens]                                           | 70.1          | 8            | 10         | 107    | 10                | 798                     | 73                              | 10                                           | 10                                       | 0                | 1.06.E+08          | 1.71.E+08          | 1.81.E+08          | 1.64.E+08          | 1.72.E+08              | 1.65.E+08              | 1.98.E+08              | 1.62.E+08              |
| 688 | P28066-1  | Proteasome subunit alpha type-5 [OS=Homo sapiens]                      | 70.1          | 37           | 7          | 363    | 7                 | 6717                    | 513                             | 7                                            | 7                                        | 0                | 6.92.E+08          | 7.18.E+08          | 6.81.E+08          | 7.25.E+08          | 8.73.E+08              | 8.33.E+08              | 8.45.E+08              | 8.43.E+08              |
| 689 | Q8NBS9-1  | Thioredoxin domain-containing protein 5 [OS=Homo sapiens]              | 70.0          | 27           | 10         | 481    | 10                | 4496                    | 479                             | 10                                           | 10                                       | 0                | 4.97.E+08          | 5.27.E+08          | 4.64.E+08          | 5.19.E+08          | 6.07.E+08              | 6.11.E+08              | 5.21.E+08              | 6.12.E+08              |
| 690 | Q7L2H7    | Eukaryotic translation initiation factor 3 subunit M [OS=Homo sapiens] | 69.7          | 30           | 7          | 189    | 7                 | 1948                    | 200                             | 6                                            | 7                                        | 0                | 2.97.E+08          | 2.73.E+08          | 2.47.E+08          | 3.10.E+08          | 3.10.E+08              | 2.68.E+08              | 1.78.E+08              | 3.20.E+08              |
| 691 | Q13151    | Heterogeneous nuclear ribonucleoprotein A0 [OS=Homo sapiens]           | 69.7          | 33           | 8          | 539    | 6                 | 4796                    | 570                             | 8                                            | 8                                        | 0                | 3.27.E+08          | 3.38.E+08          | 3.37.E+08          | 3.41.E+08          | 3.84.E+08              | 3.98.E+08              | 3.77.E+08              | 4.01.E+08              |
| 692 | Q99733    | Nucleosome assembly protein 1-like 4 [OS=Homo sapiens]                 | 69.6          | 27           | 8          | 231    | 6                 | 2702                    | 229                             | 7                                            | 8                                        | 0                | 1.08.E+08          | 1.11.E+08          | 1.11.E+08          | 1.00.E+08          | 1.70.E+08              | 2.00.E+08              | 1.64.E+08              | 1.60.E+08              |
| 693 | Q14978-1  | nucleolar and coiled-body phosphoprotein 1 [OS=Homo sapiens]           | 69.6          | 12           | 7          | 483    | 1                 | 5139                    | 443                             | 7                                            | 7                                        | 5                | 2.42.E+08          | 2.45.E+08          | 2.46.E+08          | 2.74.E+08          | 1.99.E+08              | 1.91.E+08              | 2.08.E+08              | 1.90.E+08              |
| 694 | Q8IVT2    | Mitotic interactor and substrate of PLK1 [OS=Homo sapiens]             | 69.2          | 28           | 10         | 141    | 10                | 1022                    | 113                             | 10                                           | 10                                       | 0                | 2.04.E+08          | 2.06.E+08          | 2.13.E+08          | 1.96.E+08          | 1.71.E+08              | 1.88.E+08              | 1.95.E+08              | 1.62.E+08              |
| 695 | P62750    | 60S ribosomal protein L23a [OS=Homo sapiens]                           | 69.2          | 38           | 6          | 536    | 6                 | 4599                    | 603                             | 6                                            | 6                                        | 0                | 1.13.E+09          | 9.24.E+08          | 1.19.E+09          | 1.13.E+09          | 1.01.E+09              | 1.05.E+09              | 1.14.E+09              | 1.08.E+09              |
| 696 | Q15459    | splicing factor 3A subunit 1 [OS=Homo sapiens]                         | 69.1          | 18           | 9          | 190    | 9                 | 1491                    | 234                             | 9                                            | 9                                        | 0                | 2.17.E+08          | 2.57.E+08          | 2.53.E+08          | 2.40.E+08          | 2.84.E+08              | 2.24.E+08              | 2.44.E+08              | 2.43.E+08              |
| 697 | P61289-1  | Proteasome activator complex subunit 3 [OS=Homo sapiens]               | 69.0          | 33           | 7          | 224    | 7                 | 3720                    | 262                             | 7                                            | 7                                        | 0                | 1.74.E+08          | 1.68.E+08          | 1.74.E+08          | 2.05.E+08          | 4.51.E+08              | 4.48.E+08              | 4.13.E+08              | 4.96.E+08              |
| 698 | P46060    | Ran GTPase-activating protein 1 [OS=Homo sapiens]                      | 69.0          | 23           | 8          | 188    | 8                 | 2184                    | 291                             | 8                                            | 8                                        | 0                | 1.26.E+08          | 1.45.E+08          | 1.17.E+08          | 1.37.E+08          | 1.98.E+08              | 2.03.E+08              | 1.80.E+08              | 2.12.E+08              |
| 699 | Q6KB66    | Keratin, type II cytoskeletal 80 [OS=Homo sapiens]                     | 69.0          | 17           | 8          | 1096   | 6                 | 17703                   | 1523                            | 8                                            | 7                                        | 0                | 8.00.E+07          | 7.24.E+07          | 7.89.E+07          | 8.09.E+07          | 1.13.E+08              | 1.13.E+08              | 1.05.E+08              | 1.17.E+08              |
| 700 | O76003    | glutaredoxin-3 [OS=Homo sapiens]                                       | 68.9          | 39           | 7          | 221    | 7                 | 2509                    | 233                             | 6                                            | 6                                        | 0                | 2.27.E+08          | 2.30.E+08          | 2.15.E+08          | 2.12.E+08          | 2.24.E+08              | 2.29.E+08              | 2.16.E+08              | 2.20.E+08              |
| 701 | Q9Y552    | Serine/threonine-protein kinase MRCK beta [OS=Homo sapiens]            | 68.9          | 10           | 11         | 239    | 11                | 2345                    | 154                             | 11                                           | 11                                       | 0                | 4.57.E+08          | 4.96.E+08          | 5.14.E+08          | 4.98.E+08          | 5.29.E+08              | 5.33.E+08              | 5.34.E+08              | 5.68.E+08              |
| 702 | P20810-1  | Calpastatin [OS=Homo sapiens]                                          | 68.7          | 28           | 9          | 109    | 9                 | 1057                    | 129                             | 9                                            | 9                                        | 0                | 1.87.E+08          | 1.99.E+08          | 1.96.E+08          | 2.08.E+08          | 2.06.E+08              | 2.03.E+08              | 1.54.E+08              | 1.93.E+08              |
| 703 | P61163    | Alpha-centractin [OS=Homo sapiens]                                     | 68.7          | 34           | 8          | 268    | 8                 | 3186                    | 322                             | 7                                            | 7                                        | 0                | 2.75.E+08          | 3.02.E+08          | 2.80.E+08          | 3.02.E+08          | 4.01.E+08              | 3.95.E+08              | 3.91.E+08              | 3.18.E+08              |
| 704 | P60903    | Protein S100-A10 [OS=Homo sapiens]                                     | 68.6          | 45           | 4          | 816    | 4                 | 14411                   | 1069                            | 3                                            | 4                                        | 0                | 5.87.E+09          | 5.96.E+09          | 6.10.E+09          | 5.84.E+09          | 4.42.E+09              | 4.74.E+09              | 4.81.E+09              | 4.51.E+09              |
| 705 | Q9BZZ5-2  | Isoform 2 of Apoptosis inhibitor 5 [OS=Homo sapiens]                   | 68.5          | 25           | 8          | 148    | 1                 |                         | 429                             | 8                                            | 0                                        | 1.66.E+07        | 1.87.E+07          | 1.83.E+07          | 1.74.E+07          | 2.12.E+07          | 2.05.E+07              | 2.09.E+07              | 2.10.E+07              |                        |
| 706 | P78417    | Glutathione S-transferase omega-1 [OS=Homo sapiens]                    | 68.5          | 39           | 12         | 492    | 12                | 2968                    | 370                             | 12                                           | 12                                       | 0                | 9.74.E+08          | 9.49.E+08          | 9.78.E+08          | 9.97.E+08          | 8.70.E+08              | 8.79.E+08              | 9.11.E+08              | 8.83.E+08              |
| 707 | Q07020    | 60S ribosomal protein L18 [OS=Homo sapiens]                            | 68.4          | 38           | 6          | 528    | 6                 | 7908                    | 634                             | 6                                            | 6                                        | 0                | 1.90.E+09          | 1.93.E+09          | 1.93.E+09          | 2.04.E+09          | 1.61.E+09              | 1.55.E+09              | 1.73.E+09              | 1.60.E+09              |
| 708 | P62249    | 40S ribosomal protein S16 [OS=Homo sapiens]                            | 68.3          | 44           | 9          | 746    | 9                 | 9248                    | 803                             | 8                                            | 9                                        | 0                | 2.61.E+09          | 2.54.E+09          | 2.65.E+09          | 2.52.E+09          | 2.30.E+09              | 2.32.E+09              | 1.92.E+09              | 2.34.E+09              |
| 709 | Q9BPW8    | Protein NipSnap homolog 1 [OS=Homo sapiens]                            | 68.3          | 40           | 7          | 199    | 6                 | 2151                    | 265                             | 7                                            | 6                                        | 1                | 3.10.E+08          | 3.05.E+08          | 3.05.E+08          | 2.46.E+08          | 3.06.E+08              | 2.99.E+08              | 2.50.E+08              | 2.77.E+08              |
| 710 | Q14257    | Reticulocalbin-2 [OS=Homo sapiens]                                     | 68.2          | 24           | 6          | 145    | 6                 | 4339                    | 236                             | 6                                            | 6                                        | 0                | 1.03.E+08          | 1.07.E+08          | 9.17.E+07          | 1.12.E+08          | 1.59.E+08              | 1.60.E+08              | 1.51.E+08              | 1.66.E+08              |

| No. | Accession | Description                                                                     | Sum PEP Score | Coverage [%] | # Peptides | # PSMs | # Unique Peptides | Score Mascot: A5 Mascot | Score Sequest HT: A2 Sequest HT | # Peptides (by Search Engine): A2 Sequest HT | # Peptides (by Search Engine): A5 Mascot | # Razor Peptides | ctrl Abundance_s_1 | ctrl Abundance_s_2 | ctrl Abundance_s_3 | ctrl Abundance_s_4 | JAM-A KO Abundance_s_1 | JAM-A KO Abundance_s_2 | JAM-A KO Abundance_s_3 | JAM-A KO Abundance_s_4 |
|-----|-----------|---------------------------------------------------------------------------------|---------------|--------------|------------|--------|-------------------|-------------------------|---------------------------------|----------------------------------------------|------------------------------------------|------------------|--------------------|--------------------|--------------------|--------------------|------------------------|------------------------|------------------------|------------------------|
| 711 | O00425    | Insulin-like growth factor 2 mRNA-binding protein 3 [OS=Homo sapiens]           | 68.2          | 19           | 8          | 104    | 7                 | 2135                    | 154                             | 8                                            | 8                                        | 1                | 1.52.E+08          | 1.67.E+08          | 1.57.E+08          | 1.55.E+08          | 2.08.E+08              | 2.15.E+08              | 2.10.E+08              | 2.11.E+08              |
| 712 | P08621-1  | U1 small nuclear ribonucleoprotein 70 kDa [OS=Homo sapiens]                     | 68.0          | 26           | 10         | 267    | 10                | 1622                    | 247                             | 8                                            | 10                                       | 0                | 4.04.E+08          | 4.29.E+08          | 4.71.E+08          | 5.00.E+08          | 4.76.E+08              | 4.22.E+08              | 4.98.E+08              | 4.07.E+08              |
| 713 | Q13011    | Delta(3,5)-Delta(2,4)-dienoyl-CoA isomerase, mitochondrial [OS=Homo sapiens]    | 68.0          | 40           | 9          | 561    | 9                 | 7936                    | 764                             | 9                                            | 8                                        | 0                | 7.46.E+08          | 7.73.E+08          | 7.86.E+08          | 7.11.E+08          | 4.51.E+08              | 4.32.E+08              | 4.58.E+08              | 4.66.E+08              |
| 714 | Q9Y570    | Protein phosphatase methylesterase 1 [OS=Homo sapiens]                          | 68.0          | 42           | 10         | 156    | 10                | 1033                    | 175                             | 10                                           | 10                                       | 0                | 1.71.E+08          | 1.43.E+08          | 1.74.E+08          | 1.78.E+08          | 2.60.E+08              | 2.27.E+08              | 2.53.E+08              | 2.79.E+08              |
| 715 | Q9Y224    | UPF0568 protein C14orf166 [OS=Homo sapiens]                                     | 67.9          | 36           | 6          | 154    | 6                 | 2025                    | 192                             | 6                                            | 6                                        | 0                | 1.14.E+08          | 1.41.E+08          | 1.20.E+08          | 1.45.E+08          | 1.78.E+08              | 1.69.E+08              | 1.67.E+08              | 1.82.E+08              |
| 716 | Q9BWF3-1  | RNA-binding protein 4 [OS=Homo sapiens]                                         | 67.3          | 29           | 6          | 184    | 6                 | 2967                    | 296                             | 6                                            | 6                                        | 0                | 1.69.E+08          | 1.66.E+08          | 1.77.E+08          | 1.79.E+08          | 2.14.E+08              | 2.11.E+08              | 2.15.E+08              | 2.15.E+08              |
| 717 | P61224-1  | Ras-related protein Rap-1b [OS=Homo sapiens]                                    | 67.3          | 43           | 8          | 357    | 8                 | 5986                    | 407                             | 8                                            | 7                                        | 0                | 3.67.E+08          | 3.65.E+08          | 3.67.E+08          | 4.00.E+08          | 5.66.E+08              | 5.45.E+08              | 5.56.E+08              | 5.47.E+08              |
| 718 | Q7Z4W1    | L-xylulose reductase [OS=Homo sapiens]                                          | 67.3          | 50           | 9          | 145    | 9                 | 1318                    | 133                             | 9                                            | 9                                        | 0                | 2.52.E+08          | 2.32.E+08          | 2.41.E+08          | 2.15.E+08          | 1.29.E+08              | 1.10.E+08              | 1.37.E+08              | 1.26.E+08              |
| 719 | P62899    | 60S ribosomal protein L31 [OS=Homo sapiens]                                     | 67.3          | 34           | 5          | 316    | 5                 | 4334                    | 559                             | 5                                            | 5                                        | 0                | 7.63.E+08          | 7.54.E+08          | 7.69.E+08          | 8.40.E+08          | 7.35.E+08              | 7.38.E+08              | 7.30.E+08              | 7.22.E+08              |
| 720 | Q02218    | 2-oxoglutarate dehydrogenase, mitochondrial [OS=Homo sapiens]                   | 67.1          | 16           | 8          | 208    | 8                 | 1938                    | 229                             | 8                                            | 8                                        | 0                | 1.31.E+08          | 1.27.E+08          | 1.28.E+08          | 1.48.E+08          | 1.32.E+08              | 1.23.E+08              | 1.22.E+08              | 1.18.E+08              |
| 721 | Q15056-1  | Eukaryotic translation initiation factor 4H [OS=Homo sapiens]                   | 67.0          | 37           | 6          | 341    | 6                 | 3388                    | 436                             | 6                                            | 6                                        | 0                | 4.76.E+08          | 4.74.E+08          | 4.84.E+08          | 5.09.E+08          | 5.23.E+08              | 5.06.E+08              | 5.14.E+08              | 5.38.E+08              |
| 722 | P26196    | Probable ATP-dependent RNA helicase DDX6 [OS=Homo sapiens]                      | 66.8          | 28           | 9          | 164    | 8                 | 1293                    | 239                             | 9                                            | 8                                        | 1                | 3.30.E+08          | 3.22.E+08          | 3.21.E+08          | 3.15.E+08          | 3.46.E+08              | 3.41.E+08              | 2.87.E+08              | 3.50.E+08              |
| 723 | Q5JTH9-1  | RRP12-like protein [OS=Homo sapiens]                                            | 66.5          | 10           | 9          | 124    | 9                 | 1173                    | 95                              | 9                                            | 9                                        | 0                | 1.20.E+08          | 1.15.E+08          | 1.06.E+08          | 1.16.E+08          | 1.16.E+08              | 1.34.E+08              | 9.99.E+07              | 1.28.E+08              |
| 724 | Q15126    | phosphomevalonate kinase [OS=Homo sapiens]                                      | 66.3          | 57           | 9          | 324    | 9                 | 4736                    | 380                             | 9                                            | 9                                        | 0                | 2.79.E+08          | 3.12.E+08          | 3.12.E+08          | 3.06.E+08          | 3.93.E+08              | 3.81.E+08              | 3.94.E+08              | 3.77.E+08              |
| 725 | Q01650    | large neutral amino acids transporter small subunit 1 [OS=Homo sapiens]         | 66.2          | 17           | 6          | 259    | 6                 | 4327                    | 310                             | 6                                            | 6                                        | 0                | 3.02.E+08          | 3.00.E+08          | 3.33.E+08          | 2.93.E+08          | 4.67.E+08              | 4.81.E+08              | 5.58.E+08              | 4.89.E+08              |
| 726 | P30520    | adenylosuccinate synthetase isozyme 2 [OS=Homo sapiens]                         | 66.2          | 21           | 6          | 158    | 6                 | 3641                    | 264                             | 6                                            | 6                                        | 0                | 2.49.E+08          | 2.82.E+08          | 1.87.E+08          | 2.62.E+08          | 2.93.E+08              | 3.04.E+08              | 2.85.E+08              | 3.14.E+08              |
| 727 | P55010    | Eukaryotic translation initiation factor 5 [OS=Homo sapiens]                    | 65.9          | 28           | 11         | 484    | 11                | 2453                    | 451                             | 11                                           | 11                                       | 0                | 5.69.E+08          | 5.33.E+08          | 5.21.E+08          | 5.39.E+08          | 8.09.E+08              | 8.08.E+08              | 8.78.E+08              | 7.22.E+08              |
| 728 | P25325    | 3-mercaptopyruvate sulfurtransferase [OS=Homo sapiens]                          | 65.8          | 37           | 7          | 222    | 7                 | 2494                    | 332                             | 7                                            | 7                                        | 0                | 1.96.E+08          | 1.98.E+08          | 1.42.E+08          | 2.22.E+08          | 2.58.E+08              | 2.61.E+08              | 2.16.E+08              | 2.52.E+08              |
| 729 | P26373-1  | 60S ribosomal protein L13 [OS=Homo sapiens]                                     | 65.7          | 45           | 10         | 591    | 10                | 5850                    | 516                             | 9                                            | 8                                        | 0                | 2.22.E+09          | 2.19.E+09          | 2.33.E+09          | 2.15.E+09          | 1.86.E+09              | 1.83.E+09              | 1.92.E+09              | 1.87.E+09              |
| 730 | P68402-1  | platelet-activating factor acetylhydrolase IB subunit beta [OS=Homo sapiens]    | 65.6          | 48           | 5          | 316    | 5                 | 6341                    | 575                             | 4                                            | 5                                        | 0                | 5.07.E+08          | 5.23.E+08          | 4.75.E+08          | 5.26.E+08          | 5.21.E+08              | 5.25.E+08              | 2.69.E+08              | 5.30.E+08              |
| 731 | P78344-1  | Eukaryotic translation initiation factor 4 gamma 2 [OS=Homo sapiens]            | 65.5          | 18           | 13         | 259    | 13                | 1569                    | 225                             | 13                                           | 13                                       | 0                | 2.13.E+08          | 2.61.E+08          | 2.63.E+08          | 2.62.E+08          | 3.30.E+08              | 3.20.E+08              | 2.85.E+08              | 3.10.E+08              |
| 732 | P61088    | ubiquitin-conjugating enzyme E2 N [OS=Homo sapiens]                             | 65.5          | 66           | 8          | 453    | 8                 | 4826                    | 669                             | 8                                            | 8                                        | 0                | 6.48.E+08          | 6.41.E+08          | 6.88.E+08          | 6.00.E+08          | 6.94.E+08              | 7.02.E+08              | 7.52.E+08              | 7.12.E+08              |
| 733 | Q93052    | Lipoma-preferred partner [OS=Homo sapiens]                                      | 65.5          | 21           | 7          | 195    | 7                 | 1228                    | 279                             | 7                                            | 7                                        | 0                | 1.33.E+08          | 1.30.E+08          | 1.20.E+08          | 1.24.E+08          | 2.03.E+08              | 1.94.E+08              | 1.74.E+08              | 1.96.E+08              |
| 734 | Q9HAM9    | EH domain-containing protein 1 [OS=Homo sapiens]                                | 65.2          | 39           | 12         | 230    | 10                | 867                     | 207                             | 12                                           | 12                                       | 2                | 3.21.E+08          | 3.73.E+08          | 3.44.E+08          | 3.98.E+08          | 2.44.E+08              | 2.49.E+08              | 2.67.E+08              | 2.59.E+08              |
| 735 | Q14498-1  | RNA-binding protein 39 [OS=Homo sapiens]                                        | 64.9          | 29           | 9          | 172    | 9                 | 3886                    | 293                             | 9                                            | 9                                        | 0                | 2.81.E+08          | 3.01.E+08          | 2.20.E+08          | 2.66.E+08          | 2.65.E+08              | 2.90.E+08              | 2.20.E+08              | 2.76.E+08              |
| 736 | Q16630    | Cleavage and polyadenylation specificity factor subunit 6 [OS=Homo sapiens]     | 64.9          | 13           | 4          | 110    | 4                 | 1536                    | 146                             | 4                                            | 4                                        | 0                | 9.07.E+07          | 7.67.E+07          | 8.21.E+07          | 8.14.E+07          | 9.60.E+07              | 7.28.E+07              | 9.25.E+07              | 9.48.E+07              |
| 737 | P06703    | protein S100-A6 [OS=Homo sapiens]                                               | 64.8          | 57           | 6          | 116    | 6                 | 1441                    | 70                              | 4                                            | 6                                        | 0                | 3.85.E+08          | 3.45.E+08          | 3.64.E+08          | 3.86.E+08          | 8.13.E+07              | 9.61.E+07              | 9.68.E+07              | 8.26.E+07              |
| 738 | O94973    | AP-2 complex subunit alpha-2 [OS=Homo sapiens]                                  | 64.6          | 17           | 9          | 215    | 5                 | 2501                    | 267                             | 9                                            | 4                                        | 2                | 2.15.E+08          | 2.29.E+08          | 2.17.E+08          | 2.17.E+08          | 2.58.E+08              | 2.62.E+08              | 2.43.E+08              | 2.46.E+08              |
| 739 | O95361-1  | Tripartite motif-containing protein 16 [OS=Homo sapiens]                        | 64.6          | 18           | 7          | 142    | 7                 | 1333                    | 140                             | 7                                            | 7                                        | 0                | 1.19.E+08          | 1.44.E+08          | 1.22.E+08          | 1.26.E+08          | 6.11.E+07              | 6.26.E+07              | 4.58.E+07              | 6.20.E+07              |
| 740 | O15143    | Actin-related protein 2/3 complex subunit 1B [OS=Homo sapiens]                  | 64.5          | 28           | 7          | 211    | 6                 | 2091                    | 262                             | 7                                            | 7                                        | 1                | 2.84.E+08          | 2.88.E+08          | 2.70.E+08          | 2.62.E+08          | 2.30.E+08              | 2.31.E+08              | 2.48.E+08              | 2.50.E+08              |
| 741 | P63313    | thymosin beta-10 [OS=Homo sapiens]                                              | 64.4          | 64           | 3          | 297    | 3                 | 5440                    | 230                             | 2                                            | 3                                        | 0                | 1.44.E+09          | 1.39.E+09          | 1.43.E+09          | 1.36.E+09          | 1.00.E+09              | 1.03.E+09              | 1.02.E+09              | 1.04.E+09              |
| 742 | Q13409-1  | cytoplasmic dynein 1 intermediate chain 2 [OS=Homo sapiens]                     | 64.4          | 14           | 6          | 167    | 6                 | 3590                    | 194                             | 5                                            | 6                                        | 0                | 1.13.E+08          | 1.13.E+08          | 1.16.E+08          | 1.32.E+08          | 1.28.E+08              | 1.33.E+08              | 1.34.E+08              | 1.38.E+08              |
| 743 | P38606    | V-type proton ATPase catalytic subunit A [OS=Homo sapiens]                      | 64.3          | 28           | 8          | 178    | 8                 | 1973                    | 274                             | 8                                            | 8                                        | 0                | 3.11.E+08          | 4.34.E+08          | 3.66.E+08          | 4.19.E+08          | 3.29.E+08              | 3.37.E+08              | 3.18.E+08              | 3.26.E+08              |
| 744 | Q16629    | serine/arginine-rich splicing factor 7 [OS=Homo sapiens]                        | 64.1          | 27           | 7          | 360    | 6                 | 1947                    | 349                             | 7                                            | 7                                        | 1                | 5.72.E+08          | 5.74.E+08          | 5.79.E+08          | 5.71.E+08          | 5.59.E+08              | 5.60.E+08              | 5.16.E+08              | 5.39.E+08              |
| 745 | P52907    | F-actin-capping protein subunit alpha-1 [OS=Homo sapiens]                       | 64.0          | 41           | 10         | 349    | 8                 | 2585                    | 393                             | 8                                            | 9                                        | 2                | 5.08.E+08          | 5.22.E+08          | 5.02.E+08          | 4.90.E+08          | 6.80.E+08              | 6.89.E+08              | 7.03.E+08              | 7.05.E+08              |
| 746 | P61353    | 60S ribosomal protein L27 [OS=Homo sapiens]                                     | 64.0          | 49           | 9          | 576    | 9                 | 2176                    | 579                             | 9                                            | 9                                        | 0                | 1.80.E+09          | 1.65.E+09          | 1.77.E+09          | 1.70.E+09          | 1.50.E+09              | 1.46.E+09              | 1.65.E+09              | 1.51.E+09              |
| 747 | Q14847    | LIM and SH3 domain protein 1 [OS=Homo sapiens]                                  | 64.0          | 39           | 6          | 133    | 5                 | 756                     | 114                             | 6                                            | 6                                        | 1                | 1.00.E+08          | 1.02.E+08          | 9.79.E+07          | 8.98.E+07          | 3.48.E+08              | 3.76.E+08              | 3.86.E+08              | 3.58.E+08              |
| 748 | P50213-1  | Isocitrate dehydrogenase [NAD] subunit alpha, mitochondrial [OS=Homo sapiens]   | 64.0          | 29           | 8          | 227    | 8                 | 3214                    | 348                             | 8                                            | 8                                        | 0                | 3.80.E+08          | 4.06.E+08          | 3.84.E+08          | 3.89.E+08          | 4.09.E+08              | 4.30.E+08              | 3.91.E+08              | 3.87.E+08              |
| 749 | Q9UBQ0    | Vacuolar protein sorting-associated protein 29 [OS=Homo sapiens]                | 63.7          | 40           | 6          | 212    | 6                 | 1835                    | 224                             | 5                                            | 6                                        | 0                | 2.45.E+08          | 2.36.E+08          | 2.26.E+08          | 2.56.E+08          | 2.49.E+08              | 2.46.E+08              | 2.64.E+08              | 2.50.E+08              |
| 750 | Q9UI30    | Multifunctional methyltransferase subunit TRM112-like protein [OS=Homo sapiens] | 63.7          | 50           | 4          | 230    | 4                 | 4249                    | 273                             | 4                                            | 4                                        | 0                | 1.95.E+08          | 1.65.E+08          | 1.72.E+08          | 2.23.E+08          | 1.81.E+08              | 1.82.E+08              | 1.69.E+08              | 1.74.E+08              |
| 751 | Q9UBE0-1  | SUMO-activating enzyme subunit 1 [OS=Homo sapiens]                              | 63.7          | 27           | 6          | 193    | 6                 | 5788                    | 306                             | 6                                            | 6                                        | 0                | 1.90.E+08          | 1.71.E+08          | 1.83.E+08          | 2.03.E+08          | 1.46.E+08              | 1.25.E+08              | 1.26.E+08              | 1.08.E+08              |
| 752 | P33992    | DNA replication licensing factor mcm5 [OS=Homo sapiens]                         | 63.5          | 21           | 10         | 344    | 10                | 2982                    | 442                             | 10                                           | 9                                        | 0                | 4.18.E+08          | 4.56.E+08          | 4.32.E+08          | 4.13.E+08          | 4.84.E+08              | 4.90.E+08              | 4.89.E+08              | 4.65.E+08              |
| 753 | P09972    | Fructose-bisphosphate aldolase C [OS=Homo sapiens]                              | 63.5          | 17           | 4          | 432    | 2                 | 11322                   | 902                             | 4                                            | 4                                        | 0                | 6.17.E+08          | 6.88.E+08          | 6.15.E+08          | 6.38.E+08          | 7.78.E+08              | 8.00.E+08              | 7.11.E+08              | 7.75.E+08              |
| 754 | O95433    | activator of 90 kDa heat shock protein ATPase homolog 1 [OS=Homo sapiens]       | 63.3          | 37           | 8          | 180    | 8                 | 2333                    | 256                             | 8                                            | 6                                        | 0                | 3.90.E+08          | 4.05.E+08          | 3.92.E+08          | 3.90.E+08          | 3.53.E+08              | 3.39.E+08              | 3.52.E+08              | 3.61.E+08              |
| 755 | P63220    | 40S ribosomal protein S21 [OS=Homo sapiens]                                     | 63.3          | 46           | 4          | 233    | 4                 | 4241                    | 410                             | 4                                            | 4                                        | 0                | 7.64.E+08          | 7.29.E+08          | 7.42.E+08          | 8.30.E+08          | 6.68.E+08              | 6.19.E+08              | 6.84.E+08              | 6.55.E+08              |
| 756 | O94906-1  | Pre-mRNA-processing factor 6 [OS=Homo sapiens]                                  | 63.2          | 20           | 12         | 120    | 12                | 1724                    | 121                             | 12                                           | 11                                       | 0                | 2.07.E+08          | 1.73.E+08          | 1.77.E+08          | 2.19.E+08          | 1.89.E+08              | 1.91.E+08              | 1.86.E+08              | 1.85.E+08              |
| 757 | P09661    | U2 small nuclear ribonucleoprotein A' [OS=Homo sapiens]                         | 63.2          | 45           | 7          | 139    | 7                 | 1994                    | 144                             | 6                                            | 7                                        | 0                | 1.65.E+08          | 1.68.E+08          | 1.67.E+08          | 1.33.E+08          | 1.67.E+08              | 1.79.E+08              | 1.78.E+08              | 1.80.E+08              |
| 758 | P36542-1  | ATP synthase subunit gamma, mitochondrial [OS=Homo sapiens]                     | 63.0          | 34           | 7          | 298    | 7                 | 2471                    | 311                             | 7                                            | 7                                        | 0                | 6.45.E+08          | 6.12.E+08          | 6.61.E+08          | 6.72.E+08          | 5.91.E+08              | 5.85.E+08              | 6.64.E+08              | 6.24.E+08              |
| 759 | O15231-3  | Isoform 3 of Zinc finger protein 185 [OS=Homo sapiens]                          | 62.9          | 30           | 12         | 93     | 12                |                         | 186                             | 12                                           |                                          | 0                | 1.83.E+08          | 1.80.E+08          | 1.66.E+08          | 1.81.E+08          | 1.47.E+08              | 1.55.E+08              | 1.56.E+08              | 1.41.E+08              |
| 760 | P47813    | Eukaryotic translation initiation factor 1A, X-chromosomal [OS=Homo sapiens]    | 62.7          | 44           | 8          | 273    | 8                 | 1892                    | 242                             | 8                                            | 8                                        | 0                | 4.39.E+08          | 4.08.E+08          | 4.43.E+08          | 4.70.E+08          | 4.28.E+08              | 4.16.E+08              | 4.50.E+08              | 4.21.E+08              |
| 761 | P61019-1  | Ras-related protein Rab-2A [OS=Homo sapiens]                                    | 62.7          | 42           | 7          | 168    | 7                 | 2621                    | 244                             | 6                                            | 7                                        | 0                | 3.11.E+08          | 3.14.E+08          | 3.17.E+08          | 2.98.E+08          | 3.27.E+08              | 3.46.E+08              | 2.98.E+08              | 3.39.E+08              |

| No. | Accession | Description                                                                                          | Sum PEP Score | Coverage [%] | # Peptides | # PSMs | # Unique Peptides | Score Mascot: A5 Mascot | Score Request HT: A2 Sequest HT | # Peptides (by Search Engine): A2 Sequest HT | # Peptides (by Search Engine): A5 Mascot | # Razor Peptides | ctrl Abundance s_1 | ctrl Abundance s_2 | ctrl Abundance s_3 | ctrl Abundance s_4 | JAM-A KO Abundance s_1 | JAM-A KO Abundance s_2 | JAM-A KO Abundance s_3 | JAM-A KO Abundance s_4 |
|-----|-----------|------------------------------------------------------------------------------------------------------|---------------|--------------|------------|--------|-------------------|-------------------------|---------------------------------|----------------------------------------------|------------------------------------------|------------------|--------------------|--------------------|--------------------|--------------------|------------------------|------------------------|------------------------|------------------------|
| 762 | Q13724-1  | Mannosyl-oligosaccharide glucosidase [OS=Homo sapiens]                                               | 62.5          | 14           | 6          | 132    | 6                 | 1846                    | 193                             | 6                                            | 6                                        | 0                | 6.64.E+07          | 8.23.E+07          | 5.89.E+07          | 6.94.E+07          | 6.94.E+07              | 6.80.E+07              | 5.40.E+07              | 7.76.E+07              |
| 763 | Q96P70    | Importin-9 [OS=Homo sapiens]                                                                         | 62.5          | 13           | 6          | 157    | 6                 | 3031                    | 230                             | 6                                            | 6                                        | 0                | 7.06.E+07          | 7.90.E+07          | 5.86.E+07          | 7.16.E+07          | 8.43.E+07              | 8.44.E+07              | 6.91.E+07              | 8.11.E+07              |
| 764 | Q9BQ52-1  | Zinc phosphodiesterase ELAC protein 2 [OS=Homo sapiens]                                              | 62.5          | 22           | 10         | 165    | 10                | 1582                    | 207                             | 9                                            | 10                                       | 0                | 1.90.E+08          | 2.06.E+08          | 2.18.E+08          | 2.14.E+08          | 1.20.E+08              | 1.41.E+08              | 1.44.E+08              | 1.45.E+08              |
| 765 | P61026    | ras-related protein rab-10 [OS=Homo sapiens]                                                         | 62.3          | 48           | 10         | 790    | 7                 | 10204                   | 799                             | 10                                           | 10                                       | 0                | 4.09.E+08          | 4.54.E+08          | 3.61.E+08          | 4.35.E+08          | 4.68.E+08              | 4.69.E+08              | 4.19.E+08              | 4.14.E+08              |
| 766 | Q8TC12    | Retinol dehydrogenase 11 [OS=Homo sapiens]                                                           | 62.2          | 32           | 7          | 207    | 7                 | 2431                    | 258                             | 7                                            | 7                                        | 0                | 1.81.E+08          | 2.40.E+08          | 2.47.E+08          | 2.21.E+08          | 2.10.E+08              | 2.81.E+08              | 2.80.E+08              | 2.95.E+08              |
| 767 | P42766    | 60S ribosomal protein L35 [OS=Homo sapiens]                                                          | 61.9          | 37           | 6          | 278    | 6                 | 2499                    | 355                             | 6                                            | 6                                        | 0                | 1.12.E+09          | 1.10.E+09          | 1.12.E+09          | 1.17.E+09          | 9.76.E+08              | 9.93.E+08              | 1.05.E+09              | 9.65.E+08              |
| 768 | Q8WX55    | dnaJ homolog subfamily C member 9 [OS=Homo sapiens]                                                  | 61.6          | 45           | 9          | 160    | 9                 | 1098                    | 174                             | 8                                            | 9                                        | 0                | 2.30.E+08          | 2.05.E+08          | 1.90.E+08          | 2.10.E+08          | 2.35.E+08              | 2.65.E+08              | 2.16.E+08              | 2.23.E+08              |
| 769 | P56545    | c-terminal-binding protein 2 [OS=Homo sapiens]                                                       | 61.6          | 22           | 5          | 154    | 5                 | 2370                    | 246                             | 5                                            | 5                                        | 0                | 1.18.E+08          | 1.32.E+08          | 1.06.E+08          | 1.12.E+08          | 1.13.E+08              | 9.95.E+07              | 9.70.E+07              | 1.11.E+08              |
| 770 | P60866    | 40S ribosomal protein S20 [OS=Homo sapiens]                                                          | 61.5          | 24           | 4          | 491    | 4                 | 5196                    | 721                             | 4                                            | 4                                        | 0                | 1.40.E+09          | 1.16.E+09          | 1.42.E+09          | 1.32.E+09          | 1.18.E+09              | 1.19.E+09              | 1.40.E+09              | 1.24.E+09              |
| 771 | Q14126    | Desmoglein-2 [OS=Homo sapiens]                                                                       | 61.4          | 14           | 10         | 216    | 10                | 1381                    | 230                             | 10                                           | 9                                        | 0                | 1.86.E+08          | 1.81.E+08          | 1.27.E+08          | 1.49.E+08          | 2.85.E+08              | 2.77.E+08              | 2.90.E+08              | 2.98.E+08              |
| 772 | Q06323-1  | Proteasome activator complex subunit 1 [OS=Homo sapiens]                                             | 61.2          | 52           | 8          | 152    | 8                 | 1978                    | 111                             | 8                                            | 8                                        | 0                | 3.27.E+08          | 3.12.E+08          | 3.01.E+08          | 2.96.E+08          | 3.00.E+08              | 2.97.E+08              | 3.04.E+08              | 2.94.E+08              |
| 773 | P67775    | Serine/threonine-protein phosphatase 2A catalytic subunit alpha isoform [OS=Homo sapiens]            | 61.2          | 37           | 7          | 206    | 6                 | 2982                    | 317                             | 7                                            | 7                                        | 1                | 3.06.E+08          | 3.52.E+08          | 3.12.E+08          | 3.07.E+08          | 3.81.E+08              | 4.07.E+08              | 3.19.E+08              | 4.11.E+08              |
| 774 | Q7L1Q6-1  | Basic leucine zipper and W2 domain-containing protein 1 [OS=Homo sapiens]                            | 61.2          | 21           | 7          | 464    | 6                 | 5854                    | 536                             | 7                                            | 6                                        | 1                | 3.63.E+08          | 3.56.E+08          | 3.73.E+08          | 3.37.E+08          | 3.45.E+08              | 3.53.E+08              | 3.29.E+08              | 3.45.E+08              |
| 775 | Q9Y3F4    | Serine-threonine kinase receptor-associated protein [OS=Homo sapiens]                                | 60.9          | 47           | 9          | 144    | 9                 | 1444                    | 167                             | 9                                            | 9                                        | 0                | 2.26.E+08          | 1.82.E+08          | 2.20.E+08          | 1.25.E+08          | 1.88.E+08              | 2.92.E+08              | 1.61.E+08              | 2.26.E+08              |
| 776 | Q02543    | 60S ribosomal protein L18a [OS=Homo sapiens]                                                         | 60.8          | 38           | 9          | 627    | 9                 | 5845                    | 812                             | 9                                            | 9                                        | 0                | 1.26.E+09          | 1.23.E+09          | 1.34.E+09          | 1.22.E+09          | 9.78.E+08              | 9.84.E+08              | 1.12.E+09              | 1.03.E+09              |
| 777 | O94992    | Protein HEXIM1 [OS=Homo sapiens]                                                                     | 60.8          | 32           | 6          | 146    | 6                 | 2570                    | 228                             | 6                                            | 6                                        | 0                | 1.71.E+08          | 1.87.E+08          | 1.06.E+08          | 1.79.E+08          | 3.52.E+08              | 3.42.E+08              | 3.36.E+08              | 3.36.E+08              |
| 778 | P46781    | 40S ribosomal protein S9 [OS=Homo sapiens]                                                           | 60.8          | 40           | 13         | 670    | 13                | 3067                    | 533                             | 13                                           | 13                                       | 0                | 3.52.E+09          | 3.61.E+09          | 3.61.E+09          | 3.35.E+09          | 2.88.E+09              | 3.16.E+09              | 3.01.E+09              | 3.01.E+09              |
| 779 | O94979    | Protein transport protein Sec31A [OS=Homo sapiens]                                                   | 60.8          | 13           | 10         | 132    | 10                | 1024                    | 146                             | 10                                           | 10                                       | 0                | 2.11.E+08          | 2.04.E+08          | 1.93.E+08          | 1.50.E+08          | 1.86.E+08              | 2.35.E+08              | 2.42.E+08              | 2.24.E+08              |
| 780 | Q6PKG0-1  | La-related protein 1 [OS=Homo sapiens]                                                               | 60.6          | 8            | 7          | 163    | 7                 | 2191                    | 112                             | 6                                            | 6                                        | 0                | 1.08.E+08          | 1.30.E+08          | 1.24.E+08          | 1.03.E+08          | 1.20.E+08              | 1.28.E+08              | 9.94.E+07              | 1.30.E+08              |
| 781 | P13798    | Acylamino-acid-releasing enzyme [OS=Homo sapiens]                                                    | 60.6          | 19           | 10         | 124    | 10                | 691                     | 126                             | 10                                           | 10                                       | 0                | 2.84.E+08          | 2.77.E+08          | 2.86.E+08          | 3.09.E+08          | 2.81.E+08              | 2.56.E+08              | 2.88.E+08              | 2.54.E+08              |
| 782 | O15355    | Protein phosphatase 1G [OS=Homo sapiens]                                                             | 60.6          | 24           | 7          | 163    | 7                 | 2697                    | 218                             | 7                                            | 7                                        | 0                | 1.74.E+08          | 1.64.E+08          | 1.50.E+08          | 1.73.E+08          | 2.00.E+08              | 1.99.E+08              | 1.83.E+08              | 1.99.E+08              |
| 783 | P13995    | Bifunctional methylenetetrahydrofolate dehydrogenase/cyclohydrolase, mitochondrial [OS=Homo sapiens] | 60.4          | 39           | 7          | 234    | 7                 | 2599                    | 333                             | 7                                            | 7                                        | 0                | 2.52.E+08          | 2.22.E+08          | 2.10.E+08          | 1.65.E+08          | 2.50.E+08              | 2.06.E+08              | 2.14.E+08              | 1.12.E+08              |
| 784 | Q9H583    | HEAT repeat-containing protein 1 [OS=Homo sapiens]                                                   | 60.4          | 7            | 10         | 160    | 10                | 1205                    | 83                              | 10                                           | 10                                       | 0                | 8.02.E+07          | 8.68.E+07          | 8.32.E+07          | 8.60.E+07          | 1.02.E+08              | 9.83.E+07              | 9.33.E+07              | 9.53.E+07              |
| 785 | P40261    | Nicotinamide N-methyltransferase [OS=Homo sapiens]                                                   | 60.3          | 43           | 6          | 134    | 6                 | 1500                    | 133                             | 6                                            | 6                                        | 0                | 2.35.E+08          | 3.33.E+07          | 2.25.E+08          | 2.02.E+08          | 3.06.E+08              | 3.27.E+08              | 3.62.E+08              | 3.36.E+08              |
| 786 | P62266    | 40S ribosomal protein S23 [OS=Homo sapiens]                                                          | 60.3          | 43           | 5          | 360    | 5                 | 4319                    | 484                             | 5                                            | 5                                        | 0                | 6.70.E+08          | 7.13.E+08          | 7.47.E+08          | 7.01.E+08          | 5.14.E+08              | 5.51.E+08              | 5.32.E+08              | 5.30.E+08              |
| 787 | P16070    | CD44 antigen [OS=Homo sapiens]                                                                       | 60.1          | 9            | 6          | 227    | 6                 | 3586                    | 309                             | 6                                            | 6                                        | 0                | 5.21.E+08          | 5.23.E+08          | 5.13.E+08          | 4.73.E+08          | 3.62.E+08              | 3.44.E+08              | 3.74.E+08              | 3.46.E+08              |
| 788 | O14975    | very long-chain acyl-CoA synthetase [OS=Homo sapiens]                                                | 60.0          | 17           | 7          | 301    | 7                 | 4086                    | 253                             | 7                                            | 7                                        | 0                | 1.24.E+08          | 1.37.E+08          | 1.19.E+08          | 1.34.E+08          | 1.51.E+08              | 1.43.E+08              | 1.40.E+08              | 1.49.E+08              |
| 789 | Q00688    | peptidyl-prolyl cis-trans isomerase FKBP3 [OS=Homo sapiens]                                          | 59.9          | 46           | 7          | 200    | 7                 | 696                     | 221                             | 7                                            | 7                                        | 0                | 2.64.E+08          | 2.55.E+08          | 2.86.E+08          | 2.59.E+08          | 4.10.E+08              | 4.05.E+08              | 3.55.E+08              | 4.14.E+08              |
| 790 | P49419    | Alpha-aminoacidic semialdehyde dehydrogenase [OS=Homo sapiens]                                       | 59.8          | 22           | 7          | 127    | 7                 | 3048                    | 203                             | 7                                            | 7                                        | 0                | 3.38.E+08          | 3.56.E+08          | 3.21.E+08          | 3.18.E+08          | 4.19.E+08              | 4.35.E+08              | 4.30.E+08              | 4.17.E+08              |
| 791 | P46459    | Vesicle-fusing ATPase [OS=Homo sapiens]                                                              | 59.6          | 20           | 10         | 256    | 10                | 1952                    | 198                             | 10                                           | 9                                        | 0                | 1.54.E+08          | 1.75.E+08          | 1.18.E+08          | 1.41.E+08          | 2.10.E+08              | 2.06.E+08              | 2.05.E+08              | 2.65.E+08              |
| 792 | O14880    | Microsomal glutathione S-transferase 3 [OS=Homo sapiens]                                             | 59.6          | 60           | 5          | 38     | 5                 | 861                     | 65                              | 4                                            | 5                                        | 0                | 1.19.E+08          | 1.16.E+08          | 7.00.E+07          | 1.12.E+08          | 5.38.E+07              | 5.06.E+07              | 3.45.E+07              | 4.73.E+07              |
| 793 | P63000-1  | Ras-related G3 botulinum toxin substrate 1 [OS=Homo sapiens]                                         | 59.3          | 55           | 8          | 238    | 7                 | 1330                    | 216                             | 8                                            | 8                                        | 0                | 8.35.E+08          | 7.53.E+08          | 8.23.E+08          | 9.08.E+08          | 6.15.E+08              | 6.31.E+08              | 7.59.E+08              | 6.73.E+08              |
| 794 | Q14978-3  | Isoform 3 of Nucleolar and coiled-body phosphoprotein 1 [OS=Homo sapiens]                            | 59.0          | 12           | 7          | 237    | 1                 |                         | 470                             | 7                                            |                                          | 0                |                    |                    |                    |                    |                        |                        |                        |                        |
| 795 | P12270    | Nucleoprotein TPR [OS=Homo sapiens]                                                                  | 58.9          | 6            | 9          | 186    | 9                 | 2632                    | 125                             | 8                                            | 9                                        | 0                | 1.40.E+08          | 1.44.E+08          | 1.37.E+08          | 1.35.E+08          | 1.87.E+08              | 1.68.E+08              | 1.50.E+08              | 1.63.E+08              |
| 796 | Q5VT79    | annexin A8-like protein 1 [OS=Homo sapiens]                                                          | 58.8          | 30           | 7          | 112    | 7                 | 910                     | 138                             | 7                                            | 7                                        | 0                | 1.66.E+08          | 1.57.E+08          | 1.77.E+08          | 1.64.E+08          | 1.65.E+08              | 1.62.E+08              | 1.74.E+08              | 1.63.E+08              |
| 797 | P63173    | 60s ribosomal protein L38 [OS=Homo sapiens]                                                          | 58.7          | 53           | 4          | 452    | 4                 | 7726                    | 652                             | 4                                            | 4                                        | 0                | 1.05.E+09          | 1.05.E+09          | 1.11.E+09          | 9.61.E+08          | 8.67.E+08              | 9.37.E+08              | 9.77.E+08              | 8.94.E+08              |
| 798 | Q53FA7-1  | Quinone oxidoreductase PIG3 [OS=Homo sapiens]                                                        | 58.6          | 30           | 6          | 205    | 6                 | 1596                    | 228                             | 6                                            | 6                                        | 0                | 2.02.E+08          | 2.21.E+08          | 2.15.E+08          | 2.23.E+08          | 2.71.E+08              | 2.64.E+08              | 2.79.E+08              | 2.75.E+08              |
| 799 | O95757    | Heat shock 70 kDa protein 4L [OS=Homo sapiens]                                                       | 58.6          | 17           | 11         | 165    | 8                 | 1815                    | 180                             | 11                                           | 10                                       | 1                | 2.30.E+08          | 2.15.E+08          | 2.11.E+08          | 2.26.E+08          | 2.16.E+08              | 1.86.E+08              | 1.94.E+08              | 1.92.E+08              |
| 800 | Q9Y285    | Phenylalanine-tRNA ligase alpha subunit [OS=Homo sapiens]                                            | 58.6          | 22           | 8          | 161    | 8                 | 1746                    | 188                             | 7                                            | 8                                        | 0                | 1.93.E+08          | 2.81.E+08          | 2.01.E+08          | 3.23.E+08          | 3.66.E+08              | 3.54.E+08              | 3.42.E+08              | 3.68.E+08              |
| 801 | P52888    | thimet oligopeptidase [OS=Homo sapiens]                                                              | 58.5          | 19           | 9          | 86     | 9                 | 496                     | 68                              | 9                                            | 9                                        | 0                | 1.24.E+08          | 1.16.E+08          | 1.03.E+08          | 1.06.E+08          | 1.08.E+08              | 9.95.E+07              | 1.19.E+08              | 1.16.E+08              |
| 802 | P48507    | Glutamate-cysteine ligase regulatory subunit [OS=Homo sapiens]                                       | 58.4          | 38           | 6          | 191    | 6                 | 2517                    | 294                             | 6                                            | 6                                        | 0                | 4.07.E+08          | 4.23.E+08          | 4.06.E+08          | 3.90.E+08          | 4.48.E+08              | 4.87.E+08              | 4.53.E+08              | 4.88.E+08              |
| 803 | Q8WXF1    | Paraspeckle component 1 [OS=Homo sapiens]                                                            | 58.3          | 16           | 6          | 268    | 6                 | 4055                    | 372                             | 6                                            | 6                                        | 0                | 1.69.E+08          | 1.72.E+08          | 1.63.E+08          | 1.67.E+08          | 1.67.E+08              | 1.69.E+08              | 1.69.E+08              | 1.67.E+08              |
| 804 | P84243    | histone H3.3 [OS=Homo sapiens]                                                                       | 58.3          | 48           | 6          | 1353   | 1                 | 18692                   | 1781                            | 6                                            | 5                                        | 0                | 8.65.E+08          | 8.98.E+08          | 8.06.E+08          | 8.01.E+08          | 4.75.E+08              | 4.38.E+08              | 3.77.E+08              | 4.26.E+08              |
| 805 | P55769    | NHP2-like protein 1 [OS=Homo sapiens]                                                                | 58.2          | 47           | 6          | 286    | 6                 | 3349                    | 382                             | 6                                            | 5                                        | 0                | 4.94.E+08          | 4.49.E+08          | 4.71.E+08          | 5.09.E+08          | 4.06.E+08              | 3.64.E+08              | 4.08.E+08              | 3.86.E+08              |
| 806 | Q9NVA2-1  | Septin-11 [OS=Homo sapiens]                                                                          | 58.2          | 28           | 10         | 281    | 7                 | 2940                    | 260                             | 9                                            | 3                                        | 3                | 6.08.E+08          | 6.05.E+08          | 6.16.E+08          | 6.02.E+08          | 6.95.E+08              | 7.42.E+08              | 7.29.E+08              | 7.38.E+08              |
| 807 | Q14108-1  | Lysosome membrane protein 2 [OS=Homo sapiens]                                                        | 58.2          | 18           | 6          | 176    | 6                 | 911                     | 216                             | 5                                            | 6                                        | 0                | 2.68.E+08          | 2.62.E+08          | 2.83.E+08          | 2.60.E+08          | 3.95.E+08              | 3.33.E+08              | 3.52.E+08              | 3.57.E+08              |
| 808 | Q9BUP3    | Oxidoreductase htpatip2 [OS=Homo sapiens]                                                            | 58.0          | 47           | 8          | 141    | 8                 | 659                     | 187                             | 8                                            | 8                                        | 0                | 2.43.E+08          | 2.48.E+08          | 2.11.E+08          | 2.13.E+08          | 3.76.E+08              | 3.66.E+08              | 3.57.E+08              | 3.74.E+08              |
| 809 | Q9Y266    | nuclear migration protein nudC [OS=Homo sapiens]                                                     | 57.6          | 18           | 4          | 176    | 4                 | 1164                    | 180                             | 4                                            | 4                                        | 0                | 1.92.E+08          | 1.87.E+08          | 1.87.E+08          | 2.22.E+08          | 2.04.E+08              | 2.06.E+08              | 2.29.E+08              | 2.18.E+08              |
| 810 | P62829    | 60S ribosomal protein L23 [OS=Homo sapiens]                                                          | 57.6          | 51           | 6          | 394    | 6                 | 7043                    | 510                             | 6                                            | 6                                        | 0                | 1.54.E+09          | 1.57.E+09          | 1.57.E+09          | 1.44.E+09          | 1.48.E+09              | 1.50.E+09              | 1.35.E+09              | 1.47.E+09              |
| 811 | P16949-1  | Stathmin [OS=Homo sapiens]                                                                           | 57.6          | 32           | 7          | 438    | 7                 | 4978                    | 584                             | 7                                            | 7                                        | 0                | 9.54.E+08          | 9.31.E+08          | 9.42.E+08          | 8.17.E+08          | 1.16.E+09              | 1.22.E+09              | 1.19.E+09              | 1.19.E+09              |
| 812 | P52294    | Importin subunit alpha-5 [OS=Homo sapiens]                                                           | 57.5          | 21           | 6          | 225    | 3                 | 1820                    | 210                             | 6                                            | 6                                        | 0                | 4.82.E+07          | 5.25.E+07          | 4.65.E+07          | 7.51.E+07          | 3.46.E+07              | 5.12.E+07              | 2.28.E+07              | 3.47.E+07              |
| 813 | Q9UBQ5    | Eukaryotic translation initiation factor 3 subunit K [OS=Homo sapiens]                               | 57.4          | 53           | 7          | 148    | 7                 | 1311                    | 182                             | 7                                            | 7                                        | 0                | 2.12.E+08          | 2.29.E+08          | 2.24.E+08          | 1.93.E+08          | 1.77.E+08              | 1.82.E+08              | 1.75.E+08              | 1.73.E+08              |
| 814 | O43795    | Unconventional myosin-Ib [OS=Homo sapiens]                                                           | 57.4          | 12           | 8          | 78     | 7                 | 588                     | 74                              | 8                                            | 8                                        | 0                | 4.99.E+07          | 4.75.E+07          | 4.47.E+07          | 6.30.E+07          | 7.91.E+07              | 1.13.E+08              | 8.61.E+07              | 9.80.E+07              |
| 815 | P10768    | S-formylglutathione hydrolase [OS=Homo sapiens]                                                      | 57.1          | 50           | 7          | 200    | 7                 | 1808                    | 201                             | 7                                            | 7                                        | 0                | 2.70.E+08          | 2.58.E+08          | 2.23.E+08          | 2.75.E+08          | 2.96.E+08              | 2.87.E+08              | 2.65.E+08              | 2.65.E+08              |
| 816 | Q13561-1  | dynactin subunit 2 [OS=Homo sapiens]                                                                 | 57.0          | 18           | 5          | 90     | 5                 | 1003                    | 132                             | 5                                            | 5                                        | 0                | 1.48.E+08          | 1.56.E+08          | 1.49.E+08          | 1.74.E+08          | 2.21.E+08              | 2.09.E+08              | 2.15.E+08              | 2.06.E+08              |
| 817 | Q9Y696    | Chloride intracellular channel protein 4 [OS=Homo sapiens]                                           | 57.0          | 43           | 8          | 411    |                   |                         |                                 |                                              |                                          |                  |                    |                    |                    |                    |                        |                        |                        |                        |

| No. | Accession | Description                                                                       | Sum PEP Score | Coverage [%] | # Peptides | # PSMs | # Unique Peptides | Score Mascot: A5 Mascot | Score Sequest HT: A2 Sequest HT | # Peptides (by Search Engine): A2 Sequest HT | # Peptides (by Search Engine): A5 Mascot | # Razor Peptides | ctrl Abundance s_1 | ctrl Abundance s_2 | ctrl Abundance s_3 | ctrl Abundance s_4 | JAM-A KO Abundance s_1 | JAM-A KO Abundance s_2 | JAM-A KO Abundance s_3 | JAM-A KO Abundance s_4 |
|-----|-----------|-----------------------------------------------------------------------------------|---------------|--------------|------------|--------|-------------------|-------------------------|---------------------------------|----------------------------------------------|------------------------------------------|------------------|--------------------|--------------------|--------------------|--------------------|------------------------|------------------------|------------------------|------------------------|
| 820 | P35270    | Sepiapterin reductase [OS=Homo sapiens]                                           | 56.8          | 27           | 4          | 248    | 4                 | 3787                    | 262                             | 4                                            | 4                                        | 0                | 5.87.E+07          | 5.48.E+07          | 5.49.E+07          | 5.22.E+07          | 5.40.E+07              | 5.01.E+07              | 4.69.E+07              | 4.82.E+07              |
| 821 | P20073-1  | Annexin A7 [OS=Homo sapiens]                                                      | 56.5          | 20           | 8          | 302    | 8                 | 3614                    | 402                             | 8                                            | 8                                        | 0                | 4.05.E+08          | 4.15.E+08          | 4.08.E+08          | 3.71.E+08          | 4.90.E+08              | 4.92.E+08              | 4.85.E+08              | 4.78.E+08              |
| 822 | Q16851    | UTP--glucose-1-phosphate uridylyltransferase [OS=Homo sapiens]                    | 56.4          | 22           | 7          | 143    | 7                 | 1876                    | 185                             | 7                                            | 7                                        | 0                | 1.15.E+08          | 1.37.E+08          | 1.37.E+08          | 1.14.E+08          | 1.98.E+08              | 2.04.E+08              | 1.80.E+08              | 2.23.E+08              |
| 823 | P61106    | Ras-related protein Rab-14 [OS=Homo sapiens]                                      | 56.2          | 42           | 7          | 329    | 5                 | 4355                    | 452                             | 6                                            | 7                                        | 0                | 1.68.E+08          | 1.72.E+08          | 1.65.E+08          | 1.69.E+08          | 1.77.E+08              | 1.68.E+08              | 1.75.E+08              | 1.74.E+08              |
| 824 | P51398-1  | 28S ribosomal protein S29, mitochondrial [OS=Homo sapiens]                        | 56.0          | 35           | 9          | 148    | 9                 | 1333                    | 159                             | 9                                            | 9                                        | 0                | 1.60.E+08          | 1.66.E+08          | 1.51.E+08          | 1.57.E+08          | 1.41.E+08              | 1.37.E+08              | 1.41.E+08              | 1.36.E+08              |
| 825 | P28340    | DNA polymerase delta catalytic subunit [OS=Homo sapiens]                          | 55.9          | 13           | 9          | 198    | 8                 | 2057                    | 175                             | 9                                            | 9                                        | 0                | 6.68.E+07          | 1.04.E+08          | 9.48.E+07          | 8.99.E+07          | 9.33.E+07              | 8.25.E+07              | 8.24.E+07              | 6.80.E+07              |
| 826 | Q9P035    | Very-long-chain (3R)-3-hydroxyacyl-CoA dehydratase 3 [OS=Homo sapiens]            | 55.8          | 25           | 6          | 235    | 6                 | 4549                    | 314                             | 6                                            | 6                                        | 0                | 2.81.E+08          | 2.92.E+08          | 2.26.E+08          | 3.04.E+08          | 4.11.E+08              | 4.13.E+08              | 3.12.E+08              | 3.97.E+08              |
| 827 | P08240-1  | signal recognition particle receptor subunit alpha [OS=Homo sapiens]              | 55.8          | 20           | 8          | 100    | 8                 | 989                     | 74                              | 8                                            | 8                                        | 0                | 8.66.E+07          | 1.40.E+08          | 1.14.E+08          | 1.36.E+08          | 1.31.E+08              | 1.33.E+08              | 1.23.E+08              | 1.37.E+08              |
| 828 | Q9UHX1-1  | poly(U)-binding-splicing factor PUF60 [OS=Homo sapiens]                           | 55.7          | 23           | 9          | 223    | 9                 | 1153                    | 198                             | 9                                            | 9                                        | 0                | 2.28.E+08          | 2.16.E+08          | 2.19.E+08          | 2.01.E+08          | 2.13.E+08              | 2.21.E+08              | 2.21.E+08              | 2.19.E+08              |
| 829 | Q12849    | G-rich sequence factor 1 [OS=Homo sapiens]                                        | 55.7          | 20           | 5          | 224    | 5                 | 4174                    | 317                             | 5                                            | 5                                        | 0                | 1.49.E+08          | 1.74.E+08          | 2.39.E+08          | 2.19.E+08          | 1.34.E+08              | 1.73.E+08              | 1.34.E+08              | 1.76.E+08              |
| 830 | P55735-1  | protein SEC13 homolog [OS=Homo sapiens]                                           | 55.6          | 29           | 4          | 117    | 4                 | 4038                    | 204                             | 3                                            | 4                                        | 0                | 1.17.E+08          | 1.22.E+08          | 1.03.E+08          | 1.29.E+08          | 1.20.E+08              | 1.13.E+08              | 1.03.E+08              | 9.81.E+07              |
| 831 | Q12965    | unconventional myosin-1e [OS=Homo sapiens]                                        | 55.6          | 15           | 10         | 88     | 9                 | 1001                    | 96                              | 10                                           | 10                                       | 0                | 1.56.E+08          | 1.32.E+08          | 1.22.E+08          | 1.43.E+08          | 1.82.E+08              | 1.68.E+08              | 1.45.E+08              | 1.81.E+08              |
| 832 | Q9Y383    | Putative RNA-binding protein Luc7-like 2 [OS=Homo sapiens]                        | 55.6          | 17           | 5          | 194    | 5                 | 1902                    | 198                             | 5                                            | 5                                        | 0                | 1.76.E+08          | 1.62.E+08          | 1.83.E+08          | 1.63.E+08          | 1.91.E+08              | 1.89.E+08              | 2.04.E+08              | 1.85.E+08              |
| 833 | Q16891    | MICOS complex subunit Mic60 [OS=Homo sapiens]                                     | 55.4          | 16           | 7          | 128    | 7                 | 876                     | 179                             | 7                                            | 7                                        | 0                | 1.65.E+08          | 1.66.E+08          | 1.75.E+08          | 1.78.E+08          | 1.57.E+08              | 1.62.E+08              | 1.68.E+08              | 2.13.E+08              |
| 834 | P48637    | glutathione synthetase [OS=Homo sapiens]                                          | 55.4          | 26           | 8          | 188    | 8                 | 2093                    | 196                             | 7                                            | 8                                        | 0                | 2.72.E+08          | 2.83.E+08          | 2.63.E+08          | 2.75.E+08          | 3.33.E+08              | 3.32.E+08              | 3.00.E+08              | 3.31.E+08              |
| 835 | Q96199-1  | Succinate--CoA ligase [GDP-forming] subunit beta, mitochondrial [OS=Homo sapiens] | 55.4          | 27           | 9          | 193    | 9                 | 986                     | 156                             | 9                                            | 8                                        | 0                | 2.60.E+08          | 2.62.E+08          | 2.65.E+08          | 2.57.E+08          | 3.63.E+08              | 3.61.E+08              | 3.51.E+08              | 3.61.E+08              |
| 836 | Q9UNS2    | COP9 signalosome complex subunit 3 [OS=Homo sapiens]                              | 55.3          | 24           | 5          | 101    | 5                 | 2495                    | 69                              | 4                                            | 5                                        | 0                | 1.42.E+08          | 1.61.E+08          | 1.16.E+08          | 1.38.E+08          | 1.51.E+08              | 1.49.E+08              | 1.46.E+08              | 1.49.E+08              |
| 837 | P62318    | small nuclear ribonucleoprotein sm d3 [OS=Homo sapiens]                           | 55.2          | 32           | 3          | 392    | 3                 | 5324                    | 631                             | 3                                            | 3                                        | 0                | 5.29.E+08          | 5.32.E+08          | 5.10.E+08          | 5.90.E+08          | 5.48.E+08              | 5.20.E+08              | 5.46.E+08              | 5.62.E+08              |
| 838 | P04792    | Heat shock protein beta-1 [OS=Homo sapiens]                                       | 55.1          | 62           | 8          | 114    | 8                 | 1576                    | 179                             | 8                                            | 8                                        | 0                | 4.70.E+07          | 6.53.E+07          | 5.43.E+07          | 5.32.E+07          | 2.25.E+08              | 2.33.E+08              | 2.20.E+08              | 2.32.E+08              |
| 839 | O14744    | Protein arginine N-methyltransferase 5 [OS=Homo sapiens]                          | 55.0          | 24           | 9          | 142    | 9                 | 971                     | 145                             | 9                                            | 9                                        | 0                | 1.85.E+08          | 1.64.E+08          | 2.05.E+08          | 2.06.E+08          | 1.90.E+08              | 2.30.E+08              | 1.85.E+08              | 1.73.E+08              |
| 840 | P55084    | Trifunctional enzyme subunit beta, mitochondrial [OS=Homo sapiens]                | 54.9          | 19           | 7          | 206    | 7                 | 1915                    | 246                             | 7                                            | 7                                        | 0                | 2.49.E+08          | 2.42.E+08          | 2.56.E+08          | 2.44.E+08          | 2.90.E+08              | 2.73.E+08              | 2.95.E+08              | 2.83.E+08              |
| 841 | P51648    | Fatty aldehyde dehydrogenase [OS=Homo sapiens]                                    | 54.8          | 15           | 5          | 119    | 4                 | 982                     | 156                             | 5                                            | 5                                        | 0                | 1.08.E+08          | 1.07.E+08          | 9.57.E+07          | 1.02.E+08          | 1.87.E+07              | 2.45.E+07              | 1.84.E+07              | 3.44.E+07              |
| 842 | P48739    | Phosphatidylinositol transfer protein beta isoform [OS=Homo sapiens]              | 54.7          | 42           | 8          | 170    | 5                 | 877                     | 194                             | 8                                            | 8                                        | 3                | 2.59.E+08          | 2.76.E+08          | 2.85.E+08          | 2.77.E+08          | 2.89.E+08              | 2.87.E+08              | 2.79.E+08              | 2.88.E+08              |
| 843 | O60739    | eukaryotic translation initiation factor 1b [OS=Homo sapiens]                     | 54.7          | 65           | 6          | 94     | 1                 | 1227                    | 115                             | 5                                            | 6                                        | 0                |                    | 6.61.E+06          |                    | 4.81.E+06          | 1.42.E+07              | 9.91.E+05              |                        | 1.54.E+07              |
| 844 | Q99536    | Synaptic vesicle membrane protein VAT-1 homolog [OS=Homo sapiens]                 | 54.6          | 22           | 5          | 110    | 5                 | 1092                    | 167                             | 5                                            | 5                                        | 0                | 1.22.E+08          | 1.29.E+08          | 8.87.E+07          | 6.65.E+07          | 1.35.E+08              | 1.34.E+08              | 1.35.E+08              | 1.22.E+08              |
| 845 | P49721    | proteasome subunit beta type-2 [OS=Homo sapiens]                                  | 54.3          | 48           | 8          | 144    | 8                 | 1601                    | 168                             | 8                                            | 8                                        | 0                | 1.94.E+08          | 2.06.E+08          | 1.76.E+08          | 2.07.E+08          | 2.86.E+08              | 3.00.E+08              | 2.76.E+08              | 2.89.E+08              |
| 846 | P40121    | Macrophage-capping protein [OS=Homo sapiens]                                      | 54.3          | 34           | 8          | 107    | 8                 | 868                     | 124                             | 8                                            | 8                                        | 0                | 1.35.E+08          | 1.32.E+08          | 1.07.E+08          | 1.22.E+08          | 7.47.E+07              | 7.16.E+07              | 8.57.E+07              | 8.40.E+07              |
| 847 | P28070    | Proteasome subunit beta type-4 [OS=Homo sapiens]                                  | 54.2          | 43           | 7          | 231    | 7                 | 2466                    | 269                             | 7                                            | 7                                        | 0                | 3.06.E+08          | 3.14.E+08          | 2.95.E+08          | 3.48.E+08          | 3.15.E+08              | 2.88.E+08              | 2.91.E+08              | 2.97.E+08              |
| 848 | P10620    | Microsomal glutathione S-transferase 1 [OS=Homo sapiens]                          | 54.2          | 23           | 4          | 168    | 4                 | 1922                    | 264                             | 4                                            | 4                                        | 0                | 3.46.E+08          | 3.21.E+08          | 3.46.E+08          | 3.08.E+08          | 5.36.E+08              | 5.49.E+08              | 5.94.E+08              | 5.21.E+08              |
| 849 | Q9UQB8    | Brain-specific angiogenesis inhibitor 1-associated protein 2 [OS=Homo sapiens]    | 54.1          | 24           | 10         | 133    | 10                | 1116                    | 160                             | 10                                           | 10                                       | 0                | 2.24.E+08          | 2.77.E+08          | 2.24.E+08          | 2.30.E+08          | 2.07.E+08              | 2.16.E+08              | 1.62.E+08              | 1.85.E+08              |
| 850 | Q9BQ67    | Glutamate-rich WD repeat-containing protein 1 [OS=Homo sapiens]                   | 54.0          | 21           | 6          | 127    | 6                 | 1181                    | 170                             | 6                                            | 5                                        | 0                | 2.42.E+08          | 2.83.E+08          | 2.11.E+08          | 2.67.E+08          | 1.29.E+08              | 1.44.E+08              | 1.12.E+08              | 1.42.E+08              |
| 851 | Q03135    | Caveolin-1 [OS=Homo sapiens]                                                      | 53.9          | 44           | 6          | 168    | 6                 | 1006                    | 234                             | 6                                            | 5                                        | 0                | 1.87.E+08          | 1.93.E+08          | 1.93.E+08          | 2.05.E+08          | 1.55.E+08              | 1.50.E+08              | 1.61.E+08              | 1.51.E+08              |
| 852 | P07686    | Beta-hexosaminidase subunit beta [OS=Homo sapiens]                                | 53.9          | 15           | 5          | 116    | 5                 | 580                     | 150                             | 5                                            | 5                                        | 0                | 9.50.E+07          | 7.78.E+07          | 7.38.E+07          | 8.81.E+07          | 3.56.E+08              | 3.64.E+08              | 2.84.E+08              | 3.45.E+08              |
| 853 | P30085-1  | UMP--CMP kinase [OS=Homo sapiens]                                                 | 53.8          | 51           | 7          | 452    | 7                 | 3423                    | 266                             | 7                                            | 7                                        | 0                | 3.22.E+08          | 3.35.E+08          | 3.20.E+08          | 3.13.E+08          | 4.21.E+08              | 4.23.E+08              | 4.19.E+08              | 4.13.E+08              |
| 854 | P34896-1  | Serine hydroxymethyltransferase, cytosolic [OS=Homo sapiens]                      | 53.6          | 22           | 6          | 118    | 5                 | 2989                    | 187                             | 6                                            | 6                                        | 0                | 6.21.E+07          | 6.71.E+07          | 4.89.E+07          | 5.75.E+07          | 5.90.E+07              | 5.38.E+07              | 4.43.E+07              | 5.46.E+07              |
| 855 | P68400    | Casein kinase II subunit alpha [OS=Homo sapiens]                                  | 53.5          | 32           | 8          | 139    | 8                 | 1800                    | 222                             | 7                                            | 7                                        | 0                | 2.68.E+08          | 3.08.E+08          | 2.60.E+08          | 3.32.E+08          | 3.04.E+08              | 3.27.E+08              | 2.89.E+08              | 3.26.E+08              |
| 856 | Q9P0L0    | vesicle-associated membrane protein-associated protein A [OS=Homo sapiens]        | 53.5          | 35           | 6          | 202    | 6                 | 1018                    | 150                             | 6                                            | 6                                        | 0                | 2.03.E+08          | 2.04.E+08          | 2.11.E+08          | 1.78.E+08          | 2.08.E+08              | 2.30.E+08              | 2.36.E+08              | 2.17.E+08              |
| 857 | Q01844    | RNA-binding protein EWS [OS=Homo sapiens]                                         | 53.5          | 7            | 4          | 124    | 4                 | 1944                    | 188                             | 4                                            | 3                                        | 0                | 2.17.E+08          | 2.35.E+08          | 2.30.E+08          | 2.03.E+08          | 2.34.E+08              | 2.39.E+08              | 2.42.E+08              | 2.31.E+08              |
| 858 | P18754-1  | Regulator of chromosome condensation [OS=Homo sapiens]                            | 53.4          | 19           | 5          | 166    | 5                 | 2669                    | 189                             | 5                                            | 5                                        | 0                | 1.88.E+08          | 1.87.E+08          | 1.90.E+08          | 1.83.E+08          | 1.94.E+08              | 1.87.E+08              | 1.80.E+08              | 1.93.E+08              |
| 859 | Q15942    | Zyxin [OS=Homo sapiens]                                                           | 53.4          | 22           | 7          | 178    | 7                 | 2382                    | 207                             | 7                                            | 7                                        | 0                | 8.92.E+07          | 7.34.E+07          | 8.21.E+07          | 9.11.E+07          | 1.85.E+08              | 1.74.E+08              | 1.75.E+08              | 1.74.E+08              |
| 860 | P48444    | Coatamer subunit delta [OS=Homo sapiens]                                          | 53.3          | 23           | 9          | 251    | 9                 | 2030                    | 271                             | 7                                            | 9                                        | 0                | 2.26.E+08          | 2.28.E+08          | 2.21.E+08          | 2.37.E+08          | 3.04.E+08              | 2.79.E+08              | 2.32.E+08              | 2.83.E+08              |
| 861 | Q99471-1  | prefoldin subunit 5 [OS=Homo sapiens]                                             | 53.2          | 43           | 4          | 224    | 4                 | 5572                    | 284                             | 3                                            | 4                                        | 0                | 9.85.E+07          | 1.13.E+08          | 1.00.E+08          | 1.07.E+08          | 1.46.E+08              | 1.37.E+08              | 1.27.E+08              | 1.33.E+08              |
| 862 | O00469-1  | procollagen-lysine,2-oxoglutarate 5-dioxygenase 2 [OS=Homo sapiens]               | 53.2          | 15           | 8          | 150    | 8                 | 1411                    | 103                             | 8                                            | 8                                        | 0                | 2.56.E+07          | 2.32.E+07          | 1.28.E+07          | 1.80.E+07          | 1.25.E+08              | 1.20.E+08              | 1.16.E+08              | 1.23.E+08              |
| 863 | Q16718    | NADH dehydrogenase [ubiquinone] 1 alpha subcomplex subunit 5 [OS=Homo sapiens]    | 53.0          | 58           | 4          | 172    | 4                 | 1809                    | 286                             | 4                                            | 4                                        | 0                | 1.49.E+08          | 1.49.E+08          | 1.49.E+08          | 1.49.E+08          | 1.99.E+08              | 1.97.E+08              | 1.65.E+08              | 1.89.E+08              |
| 864 | Q9NR31    | GTP-binding protein SAR1a [OS=Homo sapiens]                                       | 52.6          | 56           | 7          | 261    | 4                 | 2625                    | 337                             | 7                                            | 6                                        | 3                | 4.64.E+08          | 4.88.E+08          | 4.46.E+08          | 4.58.E+08          | 4.58.E+08              | 4.68.E+08              | 4.38.E+08              | 3.82.E+08              |
| 865 | P61916    | Epididymal secretory protein E1 [OS=Homo sapiens]                                 | 52.6          | 41           | 4          | 292    | 4                 | 2832                    | 432                             | 4                                            | 4                                        | 0                | 3.28.E+08          | 3.44.E+08          | 3.31.E+08          | 3.70.E+08          | 4.09.E+08              | 3.96.E+08              | 3.57.E+08              | 3.29.E+08              |
| 866 | Q9UQ35    | serine/arginine repetitive matrix protein 2 [OS=Homo sapiens]                     | 52.5          | 5            | 9          | 137    | 9                 | 771                     | 161                             | 9                                            | 9                                        | 0                | 3.92.E+08          | 3.72.E+08          | 4.16.E+08          | 3.52.E+08          | 3.85.E+08              | 3.92.E+08              | 4.58.E+08              | 4.11.E+08              |
| 867 | P42126    | Enoyl-CoA delta isomerase 1, mitochondrial [OS=Homo sapiens]                      | 52.2          | 30           | 7          | 104    | 7                 | 941                     | 109                             | 7                                            | 7                                        | 0                | 1.85.E+08          | 2.05.E+08          | 1.39.E+08          | 1.88.E+08          | 1.28.E+08              | 1.61.E+08              | 1.29.E+08              | 1.58.E+08              |
| 868 | P61254    | 60S ribosomal protein L26 [OS=Homo sapiens]                                       | 52.0          | 43           | 10         | 400    | 10                | 1931                    | 315                             | 10                                           | 10                                       | 0                | 6.92.E+08          | 6.54.E+08          | 7.18.E+08          | 6.16.E+08          | 5.49.E+08              | 5.70.E+08              | 6.25.E+08              | 5.66.E+08              |
| 869 | Q9P2E9-1  | Ribosome-binding protein L21 [OS=Homo sapiens]                                    | 51.9          | 11           | 9          | 68     | 9                 | 150                     | 9                               | 9                                            | 0                                        | 8.01.E+07        | 8.26.E+07          | 7.76.E+07          | 7.59.E+07          | 1.10.E+08          | 9.60.E+07              | 9.60.E+07              | 9.26.E+07              |                        |
| 870 | Q9NQR4    | Omega-amidase NIT2 [OS=Homo sapiens]                                              | 51.8          | 37           | 6          | 140    | 6                 | 1616                    | 203                             | 6                                            | 6                                        | 0                | 1.02.E+08          | 1.09.E+08          | 9.44.E+07          | 1.06.E+08          | 9.78.E+07              | 9.82.E+07              | 8.65.E+07              | 1.00.E+08              |
| 871 | Q9Y6C9    | Mitochondrial carrier homolog 2 [OS=Homo sapiens]                                 | 51.7          | 31           | 5          | 82     | 5                 | 1288                    | 133                             | 4                                            | 5                                        | 0                | 1.23.E+08          | 1.09.E+08          | 1.12.E+08          | 1.23.E+08          | 1.02.E+08              | 9.99.E+07              | 1.05.E+08              | 9.79.E+07              |



| No. | Accession | Description                                                                                         | Sum PEP Score | Coverage [%] | # Peptides | # PSMs | # Unique Peptides | Score Mascot: A5 Mascot | Score Sequest HT: A2 Sequest HT | # Peptides (by Search Engine): A2 Sequest HT | # Peptides (by Search Engine): A5 Mascot | # Razor Peptides | ctrl Abundance s_1 | ctrl Abundance s_2 | ctrl Abundance s_3 | ctrl Abundance s_4 | JAM-A KO Abundance s_1 | JAM-A KO Abundance s_2 | JAM-A KO Abundance s_3 | JAM-A KO Abundance s_4 |
|-----|-----------|-----------------------------------------------------------------------------------------------------|---------------|--------------|------------|--------|-------------------|-------------------------|---------------------------------|----------------------------------------------|------------------------------------------|------------------|--------------------|--------------------|--------------------|--------------------|------------------------|------------------------|------------------------|------------------------|
| 872 | P52815    | 39S ribosomal protein L12, mitochondrial [OS=Homo sapiens]                                          | 51.6          | 24           | 5          | 132    | 5                 | 2313                    | 220                             | 5                                            | 5                                        | 0                | 2.05.E+08          | 1.89.E+08          | 2.16.E+08          | 2.19.E+08          | 2.32.E+08              | 2.23.E+08              | 2.36.E+08              | 2.28.E+08              |
| 873 | O00429    | Dynamin-1-like protein [OS=Homo sapiens]                                                            | 51.6          | 15           | 6          | 144    | 6                 | 2860                    | 144                             | 6                                            | 6                                        | 0                | 6.01.E+07          | 6.96.E+07          | 5.44.E+07          | 7.16.E+07          | 1.01.E+08              | 9.07.E+07              | 8.21.E+07              | 9.15.E+07              |
| 874 | Q8N6T3-1  | ADP-ribosylation factor GTPase-activating protein 1 [OS=Homo sapiens]                               | 51.4          | 35           | 7          | 103    | 7                 | 1089                    | 99                              | 7                                            | 7                                        | 0                | 1.30.E+08          | 1.43.E+08          | 9.49.E+07          | 1.13.E+08          | 1.88.E+08              | 1.92.E+08              | 1.74.E+08              | 1.90.E+08              |
| 875 | P49753-1  | Acyl-coenzyme A thioesterase 2, mitochondrial [OS=Homo sapiens]                                     | 51.4          | 27           | 8          | 132    | 1                 | 1942                    | 162                             | 8                                            | 7                                        | 7                | 2.59.E+08          | 2.14.E+08          | 2.25.E+08          | 2.42.E+08          | 2.58.E+08              | 2.46.E+08              | 2.50.E+08              | 2.61.E+08              |
| 876 | O75822    | Eukaryotic translation initiation factor 3 subunit J [OS=Homo sapiens]                              | 51.4          | 29           | 8          | 90     | 8                 | 2012                    | 146                             | 8                                            | 8                                        | 0                | 2.95.E+08          | 3.31.E+08          | 2.95.E+08          | 3.20.E+08          | 3.45.E+08              | 3.44.E+08              | 3.64.E+08              | 3.46.E+08              |
| 877 | P62995    | transformer-2 protein homolog beta [OS=Homo sapiens]                                                | 51.4          | 33           | 7          | 219    | 6                 | 2434                    | 243                             | 7                                            | 7                                        | 1                | 2.51.E+08          | 2.94.E+08          | 2.73.E+08          | 2.80.E+08          | 2.33.E+08              | 2.45.E+08              | 2.62.E+08              | 2.61.E+08              |
| 878 | P63151    | Serine/threonine-protein phosphatase 2A 55 kDa regulatory subunit B alpha isoform [OS=Homo sapiens] | 51.4          | 24           | 7          | 297    | 7                 | 4635                    | 328                             | 7                                            | 7                                        | 0                | 1.74.E+08          | 1.82.E+08          | 1.74.E+08          | 1.82.E+08          | 1.58.E+08              | 1.57.E+08              | 1.56.E+08              | 1.71.E+08              |
| 879 | Q9BZE9    | tether containing UBX domain for GLUT4 [OS=Homo sapiens]                                            | 51.4          | 19           | 6          | 106    | 6                 | 1961                    | 125                             | 6                                            | 5                                        | 0                | 1.03.E+08          | 9.50.E+07          | 9.48.E+07          | 9.31.E+07          | 8.72.E+07              | 8.19.E+07              | 6.40.E+07              | 8.20.E+07              |
| 880 | Q13895    | Bystin [OS=Homo sapiens]                                                                            | 51.3          | 21           | 7          | 207    | 7                 | 2594                    | 190                             | 7                                            | 7                                        | 0                | 1.56.E+08          | 1.69.E+08          | 1.44.E+08          | 1.62.E+08          | 1.72.E+08              | 1.68.E+08              | 1.72.E+08              | 1.76.E+08              |
| 881 | Q8TAT6-1  | Nuclear protein localization protein 4 homolog [OS=Homo sapiens]                                    | 51.3          | 22           | 8          | 162    | 8                 | 1999                    | 175                             | 7                                            | 6                                        | 0                | 1.08.E+08          | 1.15.E+08          | 9.20.E+07          | 9.88.E+07          | 8.85.E+07              | 8.36.E+07              | 8.35.E+07              | 1.01.E+08              |
| 882 | P46108-1  | Adapter molecule crk [OS=Homo sapiens]                                                              | 51.2          | 36           | 8          | 175    | 8                 | 1630                    | 205                             | 8                                            | 8                                        | 0                | 2.21.E+08          | 1.95.E+08          | 2.00.E+08          | 2.08.E+08          | 1.78.E+08              | 1.43.E+08              | 1.71.E+08              | 1.44.E+08              |
| 883 | P0DM99    | Sulfotransferase 1A3 [OS=Homo sapiens]                                                              | 51.1          | 38           | 7          | 231    | 7                 | 502                     | 295                             | 7                                            | 7                                        | 0                | 2.52.E+08          | 2.33.E+08          | 2.22.E+08          | 2.38.E+08          | 4.12.E+08              | 4.18.E+08              | 3.80.E+08              | 4.10.E+08              |
| 884 | Q9BYNO    | sulfiredoxin-1 [OS=Homo sapiens]                                                                    | 51.0          | 61           | 6          | 255    | 6                 | 1017                    | 426                             | 6                                            | 6                                        | 0                | 5.11.E+08          | 5.31.E+08          | 4.50.E+08          | 5.98.E+08          | 5.26.E+08              | 5.34.E+08              | 4.88.E+08              | 5.21.E+08              |
| 885 | P31350-1  | ribonucleoside-diphosphate reductase subunit M2 [OS=Homo sapiens]                                   | 50.9          | 18           | 5          | 122    | 5                 | 2037                    | 181                             | 5                                            | 5                                        | 0                | 1.82.E+08          | 2.53.E+08          | 2.52.E+08          | 2.49.E+08          | 2.40.E+08              | 2.34.E+08              | 2.26.E+08              | 1.64.E+08              |
| 886 | Q8TDN6    | Ribosome biogenesis protein BRX1 homolog [OS=Homo sapiens]                                          | 50.8          | 37           | 9          | 222    | 9                 | 1679                    | 132                             | 9                                            | 7                                        | 0                | 1.76.E+08          | 1.87.E+08          | 1.79.E+08          | 1.88.E+08          | 1.90.E+08              | 2.17.E+08              | 1.61.E+08              | 1.75.E+08              |
| 887 | Q14376    | UDP-glucose 4-epimerase [OS=Homo sapiens]                                                           | 50.8          | 32           | 6          | 60     | 6                 | 583                     | 82                              | 6                                            | 6                                        | 0                | 9.26.E+07          | 9.08.E+07          | 8.86.E+07          | 9.76.E+07          | 1.10.E+08              | 7.63.E+07              | 1.09.E+08              | 9.82.E+07              |
| 888 | P25788-1  | Proteasome subunit alpha type-3 [OS=Homo sapiens]                                                   | 50.7          | 24           | 6          | 108    | 6                 | 1082                    | 94                              | 5                                            | 5                                        | 0                | 2.36.E+08          | 2.22.E+08          | 2.51.E+08          | 2.59.E+08          | 3.08.E+08              | 2.97.E+08              | 3.41.E+08              | 3.07.E+08              |
| 889 | Q08257    | Quinone oxidoreductase [OS=Homo sapiens]                                                            | 50.7          | 30           | 6          | 191    | 6                 | 2673                    | 334                             | 6                                            | 6                                        | 0                | 1.97.E+08          | 2.10.E+08          | 2.00.E+08          | 2.06.E+08          | 4.21.E+08              | 4.30.E+08              | 4.07.E+08              | 4.26.E+08              |
| 890 | Q96FQ6    | Protein S100-A16 [OS=Homo sapiens]                                                                  | 50.6          | 57           | 6          | 152    | 6                 | 2436                    | 178                             | 6                                            | 6                                        | 0                | 2.01.E+08          | 1.97.E+08          | 2.01.E+08          | 2.10.E+08          | 9.34.E+07              | 8.59.E+07              | 4.19.E+07              | 8.83.E+07              |
| 891 | P12830    | Cadherin-1 [OS=Homo sapiens]                                                                        | 50.6          | 15           | 6          | 96     | 6                 | 2343                    | 148                             | 6                                            | 6                                        | 0                | 5.36.E+07          | 6.19.E+07          | 8.76.E+07          | 6.36.E+07          | 1.35.E+08              | 1.82.E+08              | 1.41.E+08              | 1.37.E+08              |
| 892 | P49902    | Cytosolic purine 5'-nucleotidase [OS=Homo sapiens]                                                  | 50.5          | 19           | 6          | 122    | 6                 | 1209                    | 123                             | 6                                            | 6                                        | 0                | 5.22.E+07          | 6.80.E+07          | 6.18.E+07          | 7.05.E+07          | 8.89.E+07              | 6.64.E+07              | 7.48.E+07              | 8.32.E+07              |
| 893 | O00204    | Sulfotransferase family cytosolic 2B member 1 [OS=Homo sapiens]                                     | 50.5          | 25           | 5          | 93     | 5                 | 468                     | 75                              | 5                                            | 4                                        | 0                | 1.31.E+08          | 1.28.E+08          | 1.44.E+08          | 1.39.E+08          | 7.44.E+07              | 7.18.E+07              | 7.24.E+07              | 7.15.E+07              |
| 894 | P49755    | Transmembrane emp24 domain-containing protein 10 [OS=Homo sapiens]                                  | 50.5          | 27           | 5          | 187    | 5                 | 1764                    | 167                             | 5                                            | 5                                        | 0                | 4.14.E+08          | 4.30.E+08          | 4.40.E+08          | 4.14.E+08          | 4.09.E+08              | 4.40.E+08              | 5.09.E+08              | 4.66.E+08              |
| 895 | P29966    | Myristoylated alanine-rich C-kinase substrate [OS=Homo sapiens]                                     | 50.4          | 24           | 5          | 114    | 5                 | 535                     | 73                              | 5                                            | 5                                        | 0                | 6.55.E+07          | 6.77.E+07          | 7.36.E+07          | 6.24.E+07          | 1.50.E+08              | 1.54.E+08              | 1.59.E+08              | 1.52.E+08              |
| 896 | Q9BZQ8    | Protein Niban [OS=Homo sapiens]                                                                     | 50.3          | 8            | 5          | 107    | 5                 | 1037                    | 129                             | 5                                            | 5                                        | 0                | 6.31.E+07          | 7.01.E+07          | 5.38.E+07          | 7.63.E+07          | 3.84.E+07              | 3.65.E+07              | 4.18.E+07              | 3.11.E+07              |
| 897 | P62910    | 60S ribosomal protein L32 [OS=Homo sapiens]                                                         | 50.3          | 49           | 6          | 351    | 6                 | 3118                    | 332                             | 5                                            | 6                                        | 0                | 8.87.E+08          | 8.43.E+08          | 8.93.E+08          | 8.70.E+08          | 5.75.E+08              | 5.81.E+08              | 6.68.E+08              | 6.05.E+08              |
| 898 | Q96C90    | Protein phosphatase 1 regulatory subunit 14B [OS=Homo sapiens]                                      | 50.2          | 43           | 6          | 116    | 6                 | 1206                    | 92                              | 6                                            | 6                                        | 0                | 5.69.E+07          | 6.30.E+07          | 5.39.E+07          | 5.99.E+07          | 1.28.E+08              | 2.99.E+07              | 2.77.E+07              | 3.11.E+07              |
| 899 | P42677    | 40S ribosomal protein S27 [OS=Homo sapiens]                                                         | 50.1          | 40           | 5          | 433    | 5                 | 3404                    | 466                             | 5                                            | 5                                        | 0                | 6.92.E+08          | 6.65.E+08          | 6.13.E+08          | 7.15.E+08          | 4.91.E+08              | 5.24.E+08              | 5.41.E+08              | 5.26.E+08              |
| 900 | Q13492-1  | Phosphatidylinositol-binding clathrin assembly protein [OS=Homo sapiens]                            | 50.0          | 17           | 6          | 105    | 6                 | 1315                    | 108                             | 6                                            | 6                                        | 0                | 6.31.E+07          | 7.67.E+07          | 5.98.E+07          | 7.21.E+07          | 8.49.E+07              | 7.76.E+07              | 6.91.E+07              | 6.50.E+07              |
| 901 | Q86TX2    | acyl-coenzyme A thioesterase 1 [OS=Homo sapiens]                                                    | 49.8          | 28           | 8          | 124    | 1                 | 1953                    | 162                             | 7                                            | 7                                        | 0                | 3.97.E+07          | 3.73.E+07          | 4.06.E+07          | 3.62.E+07          | 4.86.E+07              | 4.96.E+07              | 5.65.E+07              | 5.22.E+07              |
| 902 | P38117    | electron transfer flavoprotein subunit beta [OS=Homo sapiens]                                       | 49.8          | 29           | 6          | 253    | 6                 | 3529                    | 305                             | 6                                            | 6                                        | 0                | 3.13.E+08          | 3.17.E+08          | 3.25.E+08          | 2.87.E+08          | 2.87.E+08              | 2.93.E+08              | 3.03.E+08              | 2.99.E+08              |
| 903 | P04062    | glucosylceramidase [OS=Homo sapiens]                                                                | 49.8          | 18           | 4          | 144    | 4                 | 1831                    | 248                             | 4                                            | 4                                        | 0                | 8.75.E+07          | 9.53.E+07          | 8.25.E+07          | 6.50.E+07          | 1.39.E+08              | 1.43.E+08              | 9.63.E+07              | 1.21.E+08              |
| 904 | Q9UHD1    | cysteine and histidine-rich domain-containing protein 1 [OS=Homo sapiens]                           | 49.6          | 29           | 7          | 138    | 7                 | 379                     | 132                             | 7                                            | 6                                        | 0                | 1.68.E+08          | 1.75.E+08          | 1.70.E+08          | 1.53.E+08          | 1.93.E+08              | 1.93.E+08              | 2.02.E+08              | 1.94.E+08              |
| 905 | O43598-1  | 2'-deoxynucleoside 5'-phosphate N-hydrolase 1 [OS=Homo sapiens]                                     | 49.6          | 54           | 5          | 210    | 5                 | 3213                    | 334                             | 5                                            | 5                                        | 0                | 3.29.E+08          | 3.50.E+08          | 3.46.E+08          | 3.05.E+08          | 3.72.E+08              | 4.09.E+08              | 3.86.E+08              | 4.31.E+08              |
| 906 | Q8NCW5    | NAD(P)H-hydrate epimerase [OS=Homo sapiens]                                                         | 49.6          | 35           | 8          | 269    | 8                 | 1002                    | 268                             | 8                                            | 8                                        | 0                | 2.46.E+08          | 3.37.E+08          | 3.35.E+08          | 3.77.E+08          | 2.76.E+08              | 3.99.E+08              | 2.75.E+08              | 4.14.E+08              |
| 907 | Q709C8    | Vacuolar protein sorting-associated protein 13C [OS=Homo sapiens]                                   | 49.6          | 4            | 8          | 119    | 8                 | 984                     | 107                             | 8                                            | 8                                        | 0                | 8.44.E+07          | 1.10.E+08          | 9.75.E+07          | 8.92.E+07          | 8.78.E+07              | 5.61.E+07              | 6.46.E+07              | 1.14.E+08              |
| 908 | P55036-1  | 26S proteasome non-ATPase regulatory subunit 4 [OS=Homo sapiens]                                    | 49.4          | 23           | 5          | 68     | 5                 | 609                     | 90                              | 5                                            | 5                                        | 0                | 2.74.E+08          | 2.32.E+08          | 2.48.E+08          | 2.34.E+08          | 1.97.E+08              | 2.67.E+08              | 3.23.E+08              | 3.61.E+08              |
| 909 | Q9H3P7    | Golgi resident protein GCP60 [OS=Homo sapiens]                                                      | 49.4          | 13           | 4          | 79     | 4                 | 1463                    | 122                             | 4                                            | 4                                        | 0                | 4.62.E+07          | 4.78.E+07          | 4.60.E+07          | 5.13.E+07          | 6.25.E+07              | 4.10.E+07              | 6.05.E+07              | 6.08.E+07              |
| 910 | Q92621    | Nuclear pore complex protein Nup205 [OS=Homo sapiens]                                               | 49.3          | 4            | 5          | 80     | 5                 | 1849                    | 110                             | 5                                            | 5                                        | 0                | 5.35.E+07          | 4.28.E+07          | 4.03.E+07          | 4.68.E+07          | 4.94.E+07              | 8.33.E+07              | 6.77.E+07              | 6.97.E+07              |
| 911 | Q9NYF8-1  | Bcl-2-associated transcription factor 1 [OS=Homo sapiens]                                           | 49.3          | 13           | 10         | 149    | 10                | 527                     | 135                             | 10                                           | 8                                        | 0                | 2.01.E+08          | 1.69.E+08          | 2.06.E+08          | 1.59.E+08          | 2.32.E+08              | 2.16.E+08              | 2.20.E+08              | 2.16.E+08              |
| 912 | O14828    | Secretory carrier-associated membrane protein 3 [OS=Homo sapiens]                                   | 49.3          | 27           | 5          | 67     | 5                 | 1328                    | 91                              | 5                                            | 5                                        | 0                | 1.54.E+08          | 2.05.E+08          | 1.75.E+08          | 1.85.E+08          | 2.47.E+08              | 2.19.E+08              | 2.27.E+08              | 2.13.E+08              |
| 913 | Q9NR45    | sialic acid synthase [OS=Homo sapiens]                                                              | 49.1          | 39           | 8          | 115    | 8                 | 1264                    | 110                             | 7                                            | 8                                        | 0                | 1.23.E+08          | 1.47.E+08          | 1.35.E+08          | 1.12.E+08          | 1.41.E+08              | 1.54.E+08              | 1.43.E+08              | 1.33.E+08              |
| 914 | P28838    | cytosol aminopeptidase [OS=Homo sapiens]                                                            | 48.8          | 22           | 8          | 224    | 8                 | 1503                    | 246                             | 8                                            | 8                                        | 0                | 1.47.E+08          | 1.63.E+08          | 1.36.E+08          | 1.59.E+08          | 2.20.E+08              | 2.02.E+08              | 1.73.E+08              | 2.03.E+08              |
| 915 | O60841    | Eukaryotic translation initiation factor 5B [OS=Homo sapiens]                                       | 48.8          | 14           | 8          | 105    | 8                 | 872                     | 76                              | 7                                            | 8                                        | 0                | 1.15.E+08          | 1.34.E+08          | 1.09.E+08          | 8.70.E+07          | 1.04.E+08              | 1.30.E+08              | 1.44.E+08              | 1.49.E+08              |
| 916 | P49756-1  | RNA-binding protein 25 [OS=Homo sapiens]                                                            | 48.6          | 15           | 8          | 157    | 8                 | 740                     | 150                             | 8                                            | 8                                        | 0                | 2.53.E+08          | 1.92.E+08          | 1.78.E+08          | 2.47.E+08          | 1.73.E+08              | 1.73.E+08              | 1.82.E+08              | 1.52.E+08              |
| 917 | Q14764    | major vault protein [OS=Homo sapiens]                                                               | 48.5          | 17           | 8          | 72     | 8                 | 753                     | 53                              | 7                                            | 8                                        | 0                | 7.19.E+07          | 6.53.E+07          | 6.69.E+07          | 6.92.E+07          | 2.61.E+07              | 2.60.E+07              | 2.69.E+07              | 2.75.E+07              |
| 918 | Q13148-1  | TAR DNA-binding protein 43 [OS=Homo sapiens]                                                        | 48.4          | 21           | 4          | 271    | 4                 | 5596                    | 488                             | 4                                            | 4                                        | 0                | 2.27.E+08          | 2.41.E+08          | 2.28.E+08          | 2.45.E+08          | 2.49.E+08              | 2.33.E+08              | 2.25.E+08              | 2.45.E+08              |
| 919 | Q13362    | Serine/threonine-protein phosphatase 2A 56 kDa regulatory subunit gamma isoform [OS=Homo sapiens]   | 48.4          | 19           | 7          | 137    | 4                 | 1758                    | 137                             | 7                                            | 7                                        | 3                | 1.19.E+08          | 1.26.E+08          | 1.27.E+08          | 1.43.E+08          | 1.72.E+08              | 1.67.E+08              | 1.60.E+08              | 1.59.E+08              |

| No. | Accession | Description                                                                                  | Sum PEP Score | Coverage [%] | # Peptides | # PSMs | # Unique Peptides | Score Mascot: A5 Mascot | Score Sequest HT: A2 Sequest HT | # Peptides (by Search Engine): A2 Sequest HT | # Peptides (by Search Engine): A5 Mascot | # Razor Peptides | ctrl Abundance_s_1 | ctrl Abundance_s_2 | ctrl Abundance_s_3 | ctrl Abundance_s_4 | JAM-A KO Abundance_s_1 | JAM-A KO Abundance_s_2 | JAM-A KO Abundance_s_3 | JAM-A KO Abundance_s_4 |
|-----|-----------|----------------------------------------------------------------------------------------------|---------------|--------------|------------|--------|-------------------|-------------------------|---------------------------------|----------------------------------------------|------------------------------------------|------------------|--------------------|--------------------|--------------------|--------------------|------------------------|------------------------|------------------------|------------------------|
| 920 | Q02978    | Mitochondrial 2-oxoglutarate/malate carrier protein [OS=Homo sapiens]                        | 48.4          | 22           | 6          | 197    | 6                 | 3211                    | 149                             | 5                                            | 6                                        | 0                | 2.05.E+08          | 2.13.E+08          | 1.87.E+08          | 2.17.E+08          | 1.36.E+08              | 1.58.E+08              | 1.47.E+08              | 1.60.E+08              |
| 921 | P10155-1  | 60 kDa SS-A/Ro ribonucleoprotein [OS=Homo sapiens]                                           | 48.4          | 15           | 6          | 156    | 6                 | 1509                    | 108                             | 6                                            | 6                                        | 0                | 1.34.E+08          | 1.53.E+08          | 1.50.E+08          | 1.61.E+08          | 1.44.E+08              | 1.76.E+08              | 9.40.E+07              | 1.54.E+08              |
| 922 | Q01130    | serine/arginine-rich splicing factor 2 [OS=Homo sapiens]                                     | 48.3          | 22           | 5          | 137    | 5                 | 2968                    | 85                              | 3                                            | 5                                        | 0                | 4.88.E+08          | 4.18.E+08          | 4.94.E+08          | 5.25.E+08          | 4.72.E+08              | 4.34.E+08              | 4.93.E+08              | 4.40.E+08              |
| 923 | P51812    | Ribosomal protein S6 kinase alpha-3 [OS=Homo sapiens]                                        | 48.0          | 14           | 9          | 117    | 6                 | 678                     | 133                             | 9                                            | 8                                        | 3                | 1.81.E+08          | 2.49.E+08          | 1.87.E+08          | 2.00.E+08          | 2.66.E+08              | 2.03.E+08              | 2.93.E+08              | 2.66.E+08              |
| 924 | Q9UN86    | Ras GTPase-activating protein-binding protein 2 [OS=Homo sapiens]                            | 48.0          | 17           | 5          | 212    | 4                 | 2290                    | 185                             | 4                                            | 5                                        | 0                | 9.33.E+07          | 9.42.E+07          | 8.98.E+07          | 8.99.E+07          | 9.45.E+07              | 9.33.E+07              | 8.59.E+07              | 8.35.E+07              |
| 925 | P62314    | Small nuclear ribonucleoprotein Sm D1 [OS=Homo sapiens]                                      | 47.8          | 28           | 2          | 302    | 2                 | 5431                    | 399                             | 2                                            | 2                                        | 0                | 3.81.E+08          | 3.72.E+08          | 3.85.E+08          | 3.31.E+08          | 3.30.E+08              | 3.17.E+08              | 3.45.E+08              | 3.25.E+08              |
| 926 | O75828    | Carbonyl reductase [NADPH] 3 [OS=Homo sapiens]                                               | 47.8          | 21           | 5          | 320    | 2                 | 7374                    | 515                             | 5                                            | 5                                        | 0                | 1.71.E+07          | 1.54.E+07          | 2.45.E+07          | 1.81.E+07          | 3.03.E+07              | 2.62.E+07              | 2.94.E+07              | 3.26.E+07              |
| 927 | Q92538    | Golgi-specific brefeldin A-resistance guanine nucleotide exchange factor 1 [OS=Homo sapiens] | 47.7          | 7            | 8          | 189    | 7                 | 666                     | 199                             | 8                                            | 7                                        | 0                | 5.56.E+07          | 6.11.E+07          | 5.96.E+07          | 5.90.E+07          | 6.86.E+07              | 6.54.E+07              | 6.13.E+07              | 5.91.E+07              |
| 928 | Q6P1M3-1  | Lethal(2) giant larvae protein homolog 2 [OS=Homo sapiens]                                   | 47.6          | 11           | 5          | 38     | 5                 | 315                     | 44                              | 5                                            | 5                                        | 0                | 7.68.E+07          | 8.29.E+07          | 8.24.E+07          | 9.40.E+07          | 2.67.E+07              | 3.06.E+07              | 3.15.E+07              | 1.85.E+07              |
| 929 | P14854    | Cytochrome c oxidase subunit 6B1 [OS=Homo sapiens]                                           | 47.6          | 58           | 4          | 208    | 4                 | 1854                    | 259                             | 4                                            | 4                                        | 0                | 3.39.E+08          | 3.54.E+08          | 3.36.E+08          | 3.23.E+08          | 2.66.E+08              | 2.94.E+08              | 2.69.E+08              | 2.81.E+08              |
| 930 | Q15417    | Calponin-3 [OS=Homo sapiens]                                                                 | 47.5          | 31           | 8          | 72     | 7                 | 1140                    | 89                              | 8                                            | 8                                        | 0                | 1.43.E+08          | 1.51.E+08          | 1.25.E+08          | 1.31.E+08          | 1.43.E+08              | 1.35.E+08              | 1.43.E+08              | 1.34.E+08              |
| 931 | Q04760-1  | lactoylglutathione lyase [OS=Homo sapiens]                                                   | 47.5          | 43           | 7          | 257    | 7                 | 3472                    | 321                             | 7                                            | 7                                        | 0                | 2.55.E+08          | 2.66.E+08          | 2.62.E+08          | 2.39.E+08          | 3.94.E+08              | 3.89.E+08              | 4.02.E+08              | 3.91.E+08              |
| 932 | P50914    | 60S ribosomal protein L14 [OS=Homo sapiens]                                                  | 47.5          | 24           | 6          | 443    | 6                 | 6102                    | 495                             | 6                                            | 5                                        | 0                | 1.69.E+09          | 1.66.E+09          | 1.72.E+09          | 1.75.E+09          | 1.39.E+09              | 1.36.E+09              | 1.35.E+09              | 1.37.E+09              |
| 933 | Q99729-2  | Isoform 2 of Heterogeneous nuclear ribonucleoprotein A/B [OS=Homo sapiens]                   | 47.4          | 25           | 8          | 232    | 7                 |                         | 442                             | 8                                            | 8                                        | 0                | 5.41.E+08          | 5.46.E+08          | 5.64.E+08          | 5.29.E+08          | 5.48.E+08              | 5.46.E+08              | 4.93.E+08              | 5.55.E+08              |
| 934 | Q96C86    | M7GpppX diphosphatase [OS=Homo sapiens]                                                      | 47.4          | 29           | 7          | 142    | 7                 | 1357                    | 158                             | 7                                            | 7                                        | 0                | 1.27.E+08          | 1.41.E+08          | 1.30.E+08          | 1.34.E+08          | 1.42.E+08              | 1.61.E+08              | 1.19.E+08              | 1.51.E+08              |
| 935 | P50570-1  | Dynamin-2 [OS=Homo sapiens]                                                                  | 47.3          | 12           | 8          | 145    | 8                 | 683                     | 101                             | 8                                            | 8                                        | 0                | 5.14.E+07          | 4.76.E+07          | 3.91.E+07          | 5.17.E+07          | 6.73.E+07              | 6.76.E+07              | 5.69.E+07              | 6.59.E+07              |
| 936 | P61160-1  | Actin-related protein 2 [OS=Homo sapiens]                                                    | 47.3          | 27           | 7          | 176    | 7                 | 1654                    | 200                             | 7                                            | 7                                        | 0                | 3.61.E+08          | 3.44.E+08          | 3.27.E+08          | 3.16.E+08          | 3.64.E+08              | 3.51.E+08              | 3.21.E+08              | 3.55.E+08              |
| 937 | P49257    | Protein ERGIC-53 [OS=Homo sapiens]                                                           | 47.3          | 13           | 4          | 65     | 4                 | 627                     | 103                             | 4                                            | 4                                        | 0                | 2.05.E+08          | 1.57.E+08          | 1.53.E+08          | 1.09.E+08          | 2.80.E+08              | 2.66.E+08              | 2.91.E+08              | 2.70.E+08              |
| 938 | Q9BV57    | 1,2-dihydroxy-3-keto-5-methylthiopentene dioxygenase [OS=Homo sapiens]                       | 47.0          | 47           | 6          | 208    | 6                 | 503                     | 187                             | 5                                            | 6                                        | 0                | 2.63.E+08          | 2.72.E+08          | 2.66.E+08          | 2.68.E+08          | 2.30.E+08              | 1.91.E+08              | 2.06.E+08              | 2.37.E+08              |
| 939 | Q9BS26    | Endoplasmic reticulum resident protein 44 [OS=Homo sapiens]                                  | 46.9          | 19           | 5          | 78     | 4                 | 985                     | 107                             | 5                                            | 5                                        | 0                | 3.75.E+07          | 4.08.E+07          | 3.94.E+07          | 4.00.E+07          | 6.17.E+07              | 5.71.E+07              | 4.99.E+07              | 5.31.E+07              |
| 940 | Q14696    | LDLR chaperone MESD [OS=Homo sapiens]                                                        | 46.9          | 26           | 4          | 168    | 4                 | 2020                    | 208                             | 4                                            | 4                                        | 0                | 1.65.E+08          | 1.53.E+08          | 1.65.E+08          | 1.75.E+08          | 2.10.E+08              | 1.97.E+08              | 2.07.E+08              | 1.85.E+08              |
| 941 | P36952-1  | Serpin B5 [OS=Homo sapiens]                                                                  | 46.8          | 24           | 6          | 123    | 6                 | 1800                    | 149                             | 6                                            | 6                                        | 0                | 1.46.E+08          | 2.09.E+08          | 1.49.E+08          | 1.99.E+08          | 5.97.E+07              | 6.04.E+07              | 4.75.E+07              | 6.20.E+07              |
| 942 | O15173    | Membrane-associated progesterone receptor component 2 [OS=Homo sapiens]                      | 46.7          | 49           | 7          | 228    | 6                 | 2020                    | 211                             | 7                                            | 6                                        | 0                | 2.53.E+08          | 2.62.E+08          | 2.55.E+08          | 2.64.E+08          | 3.58.E+08              | 3.80.E+08              | 3.71.E+08              | 3.51.E+08              |
| 943 | Q12874    | splicing factor 3a subunit 3 [OS=Homo sapiens]                                               | 46.6          | 21           | 6          | 70     | 6                 | 770                     | 94                              | 6                                            | 5                                        | 0                | 1.79.E+08          | 1.93.E+08          | 1.87.E+08          | 1.86.E+08          | 2.11.E+08              | 2.10.E+08              | 2.11.E+08              | 9.07.E+07              |
| 944 | O75340    | programmed cell death protein 6 [OS=Homo sapiens]                                            | 46.6          | 49           | 6          | 298    | 6                 | 4317                    | 226                             | 5                                            | 6                                        | 0                | 6.45.E+08          | 6.55.E+08          | 6.77.E+08          | 6.21.E+08          | 6.67.E+08              | 6.52.E+08              | 5.91.E+08              | 6.33.E+08              |
| 945 | Q68C22-1  | Tensin-3 [OS=Homo sapiens]                                                                   | 46.5          | 8            | 6          | 122    | 6                 | 1632                    | 177                             | 6                                            | 5                                        | 0                | 1.16.E+08          | 1.09.E+08          | 1.22.E+08          | 1.12.E+08          | 1.06.E+08              | 9.96.E+07              | 9.28.E+07              | 9.95.E+07              |
| 946 | P53634-1  | Dipeptidyl peptidase 1 [OS=Homo sapiens]                                                     | 46.4          | 14           | 5          | 86     | 5                 | 702                     | 70                              | 5                                            | 5                                        | 0                | 7.61.E+07          | 8.13.E+07          | 8.11.E+07          | 6.75.E+07          | 1.11.E+08              | 1.27.E+08              | 1.29.E+08              | 1.21.E+08              |
| 947 | P30419    | glycylpeptide N-tetradecanoyltransferase 1 [OS=Homo sapiens]                                 | 46.3          | 21           | 6          | 143    | 6                 | 1112                    | 144                             | 6                                            | 6                                        | 0                | 9.69.E+07          | 1.10.E+08          | 6.95.E+07          | 8.76.E+07          | 1.73.E+08              | 1.67.E+08              | 1.54.E+08              | 1.71.E+08              |
| 948 | Q14739    | Lamin-B receptor [OS=Homo sapiens]                                                           | 46.3          | 11           | 6          | 140    | 6                 | 2549                    | 212                             | 6                                            | 6                                        | 0                | 2.01.E+08          | 3.06.E+08          | 3.16.E+08          | 2.92.E+08          | 3.47.E+08              | 3.51.E+08              | 3.65.E+08              | 3.53.E+08              |
| 949 | O75477    | erlin-1 [OS=Homo sapiens]                                                                    | 46.3          | 35           | 7          | 88     | 7                 | 1148                    | 102                             | 7                                            | 7                                        | 0                | 1.01.E+08          | 9.18.E+07          | 9.01.E+07          | 1.06.E+08          | 1.16.E+08              | 1.31.E+08              | 1.37.E+08              | 1.33.E+08              |
| 950 | O43169    | Cytochrome b5 type B [OS=Homo sapiens]                                                       | 46.0          | 45           | 4          | 126    | 4                 | 595                     | 157                             | 4                                            | 4                                        | 0                | 1.33.E+08          | 1.35.E+08          | 1.26.E+08          | 1.15.E+08          | 1.23.E+08              | 1.22.E+08              | 1.21.E+08              | 1.33.E+08              |
| 951 | O60936-2  | Nucleolar protein 3 [OS=Homo sapiens]                                                        | 46.0          | 35           | 4          | 130    | 4                 | 2142                    | 125                             | 4                                            | 4                                        | 0                | 8.78.E+07          | 8.86.E+07          | 8.60.E+07          | 8.51.E+07          | 9.60.E+07              | 9.97.E+07              | 8.81.E+07              | 9.38.E+07              |
| 952 | Q9C005    | Protein dpy-30 homolog [OS=Homo sapiens]                                                     | 45.8          | 36           | 2          | 186    | 2                 | 2493                    | 335                             | 2                                            | 2                                        | 0                | 9.98.E+07          | 1.07.E+08          | 1.10.E+08          | 9.81.E+07          | 1.22.E+08              | 1.28.E+08              | 1.13.E+08              | 1.19.E+08              |
| 953 | P40429    | 60S ribosomal protein L13a [OS=Homo sapiens]                                                 | 45.8          | 31           | 8          | 398    | 8                 | 4425                    | 247                             | 7                                            | 5                                        | 0                | 1.74.E+09          | 1.52.E+09          | 1.71.E+09          | 1.74.E+09          | 1.45.E+09              | 1.43.E+09              | 1.23.E+09              | 1.39.E+09              |
| 954 | Q12769    | nuclear pore complex protein Nup160 [OS=Homo sapiens]                                        | 45.8          | 5            | 4          | 82     | 4                 | 908                     | 39                              | 4                                            | 4                                        | 0                | 5.49.E+07          | 5.58.E+07          | 5.18.E+07          | 4.68.E+07          | 5.13.E+07              | 3.47.E+07              | 4.93.E+07              | 4.96.E+07              |
| 955 | P42765    | 3-ketoacyl-CoA thiolase, mitochondrial [OS=Homo sapiens]                                     | 45.7          | 22           | 6          | 70     | 6                 | 328                     | 51                              | 6                                            | 6                                        | 0                | 8.15.E+07          | 8.46.E+07          | 1.22.E+08          | 8.95.E+07          | 1.13.E+08              | 1.14.E+08              | 6.95.E+07              | 1.20.E+08              |
| 956 | Q14258    | E3 ubiquitin/ISG15 ligase TRIM25 [OS=Homo sapiens]                                           | 45.6          | 12           | 6          | 197    | 6                 | 4518                    | 253                             | 6                                            | 6                                        | 0                | 9.14.E+07          | 9.22.E+07          | 9.64.E+07          | 1.10.E+08          | 1.53.E+08              | 1.48.E+08              | 1.32.E+08              | 1.42.E+08              |
| 957 | P50416    | Carnitine O-palmitoyltransferase 1, liver isoform [OS=Homo sapiens]                          | 45.6          | 12           | 7          | 188    | 7                 | 2128                    | 186                             | 7                                            | 7                                        | 0                | 7.93.E+07          | 8.35.E+07          | 8.32.E+07          | 8.53.E+07          | 1.44.E+08              | 1.41.E+08              | 1.48.E+08              | 1.45.E+08              |
| 958 | Q12756    | Kinesin-like protein KIF1A [OS=Homo sapiens]                                                 | 45.6          | 7            | 9          | 65     | 9                 | 475                     | 26                              | 8                                            | 8                                        | 0                | 1.19.E+08          | 1.14.E+08          | 1.14.E+08          | 1.11.E+08          | 1.97.E+08              | 1.89.E+08              | 1.91.E+08              | 1.81.E+08              |
| 959 | O14950    | Myosin regulatory light chain 12B [OS=Homo sapiens]                                          | 45.5          | 51           | 6          | 218    | 6                 | 5585                    | 332                             | 6                                            | 6                                        | 0                | 4.15.E+08          | 4.37.E+08          | 3.98.E+08          | 3.95.E+08          | 5.11.E+08              | 4.95.E+08              | 5.15.E+08              | 5.28.E+08              |
| 960 | Q13057    | Bifunctional coenzyme A synthase [OS=Homo sapiens]                                           | 45.4          | 27           | 7          | 176    | 7                 | 1081                    | 133                             | 7                                            | 7                                        | 0                | 9.44.E+07          | 9.85.E+07          | 7.63.E+07          | 1.03.E+08          | 1.16.E+08              | 1.45.E+08              | 1.11.E+08              | 1.36.E+08              |
| 961 | Q16658    | Fascin [OS=Homo sapiens]                                                                     | 45.4          | 15           | 5          | 40     | 5                 | 579                     | 44                              | 5                                            | 5                                        | 0                | 1.74.E+07          | 1.89.E+07          | 1.07.E+07          | 2.22.E+07          | 5.64.E+07              | 1.01.E+08              | 1.07.E+08              | 4.17.E+07              |
| 962 | P63172    | Dynein light chain Tctex-type 1 [OS=Homo sapiens]                                            | 45.4          | 30           | 2          | 172    | 2                 | 4376                    | 274                             | 2                                            | 2                                        | 0                | 5.62.E+07          | 7.25.E+07          | 6.73.E+07          | 7.31.E+07          | 9.29.E+07              | 1.02.E+08              | 9.31.E+07              | 9.71.E+07              |
| 963 | P51570    | galactokinase [OS=Homo sapiens]                                                              | 45.2          | 29           | 6          | 78     | 6                 | 1649                    | 140                             | 6                                            | 6                                        | 0                | 3.04.E+07          | 4.85.E+07          | 4.54.E+07          | 4.71.E+07          | 8.12.E+07              | 4.29.E+07              | 7.28.E+07              | 3.56.E+07              |
| 964 | Q9Y5K5-1  | Ubiquitin carboxyl-terminal hydrolase isozyme L5 [OS=Homo sapiens]                           | 45.2          | 36           | 7          | 120    | 7                 | 1368                    | 119                             | 7                                            | 7                                        | 0                | 9.62.E+07          | 1.02.E+08          | 1.02.E+08          | 9.95.E+07          | 1.41.E+08              | 1.27.E+08              | 1.25.E+08              | 1.21.E+08              |
| 965 | Q8I283    | Aldehyde dehydrogenase family 16 member A1 [OS=Homo sapiens]                                 | 45.2          | 11           | 5          | 96     | 5                 | 1983                    | 107                             | 5                                            | 5                                        | 0                | 6.12.E+07          | 5.02.E+07          | 3.59.E+07          | 6.04.E+07          | 2.15.E+07              | 2.27.E+07              | 3.98.E+07              | 2.29.E+07              |
| 966 | O15347    | High mobility group protein B3 [OS=Homo sapiens]                                             | 44.9          | 37           | 5          | 146    | 5                 | 1190                    | 241                             | 5                                            | 5                                        | 0                | 3.31.E+08          | 3.53.E+08          | 3.15.E+08          | 2.79.E+08          | 4.56.E+08              | 4.90.E+08              | 6.14.E+08              | 4.69.E+08              |
| 967 | O43252    | bifunctional 3'-phosphoadenosine 5'-phosphosulfate synthase 1 [OS=Homo sapiens]              | 44.9          | 18           | 6          | 73     | 6                 | 933                     | 97                              | 6                                            | 6                                        | 0                | 6.40.E+07          | 7.00.E+07          | 7.05.E+07          | 7.10.E+07          | 9.64.E+07              | 9.01.E+07              | 8.61.E+07              | 9.34.E+07              |
| 968 | O43765    | Small glutamine-rich tetrapeptide repeat-containing protein alpha [OS=Homo sapiens]          | 44.9          | 20           | 5          | 243    | 5                 | 3085                    | 279                             | 5                                            | 5                                        | 0                | 7.84.E+07          | 7.79.E+07          | 7.57.E+07          | 8.98.E+07          | 1.11.E+08              | 1.18.E+08              | 1.14.E+08              | 1.13.E+08              |
| 969 | Q9Y2B0    | Protein canopy homolog 2 [OS=Homo sapiens]                                                   | 44.8          | 35           | 4          | 195    | 4                 | 2667                    | 302                             | 4                                            | 4                                        | 0                | 2.46.E+08          | 2.41.E+08          | 2.46.E+08          | 2.50.E+08          | 4.23.E+08              | 4.19.E+08              | 3.81.E+08              | 3.99.E+08              |
| 970 | P53004    | Biliverdin reductase A [OS=Homo sapiens]                                                     | 44.7          | 24           | 5          | 238    | 5                 | 4304                    | 366                             | 5                                            | 5                                        | 0                | 1.23.E+08          | 1.17.E+08          | 1.30.E+08          | 1.15.E+08          | 2.39.E+08              | 2.06.E+08              | 2.06.E+08              | 2.24.E+08              |
| 971 | Q5JPE7    | NODAL modulator 2 [OS=Homo sapiens]                                                          | 44.7          | 8            | 5          | 186    | 5                 | 2872                    | 240                             | 5                                            | 5                                        | 0                | 5.88.E+07          | 4.24.E+07          | 5.35.E+07          | 6.57.E+07          | 7.45.E+07              | 7.36.E+07              | 5.48.E+07              | 6.17.E+07              |
| 972 | P84103    | Serine/arginine-rich splicing factor 3 [OS=Homo sapiens]                                     | 44.4          | 35           | 6          | 453    | 5                 | 2007                    | 517                             | 6                                            | 6                                        | 0                | 9.44.E+08          | 9.74.E+08          | 9.75.E+08          | 8.60.E+08          | 8.95.E+08              | 9.28.E+08              | 8.46.E+08              | 9.04.E+08              |
| 973 | P06280    | alpha-galactosidase A [OS=Homo sapiens]                                                      | 44.3          | 22           | 7          | 55     | 7                 | 787                     | 58                              | 7                                            | 6                                        | 0                | 1.19.E+08          | 1.17.E+08          | 8.91.E+07          | 1.13.E+08          | 2.41.E+08              | 2.48.E+08              | 2.37.E+08              | 2.49.E+08              |
| 974 | O75607    | Nucleoplasmin-3 [OS=Homo sapiens]                                                            | 44.3          | 32           | 3          | 18     | 3                 | 364                     | 30                              | 3                                            | 3                                        | 0                | 2.54.E+07          | 1.55.E+07          | 1.66.E+07          | 1.84.E+07          | 9.02.E+06              | 9.11.E+06              | 1.43.E+07              | 1.27.E+07              |
| 975 | P06730    |                                                                                              |               |              |            |        |                   |                         |                                 |                                              |                                          |                  |                    |                    |                    |                    |                        |                        |                        |                        |

| No.  | Accession | Description                                                                   | Sum PEP Score | Coverage [%] | # Peptides | # PSMs | # Unique Peptides | Score Mascot: A5 Mascot | Score Sequest HT: A2 Sequest HT | # Peptides (by Search Engine): A2 Sequest HT | # Peptides (by Search Engine): A5 Mascot | # Razor Peptides | ctrl Abundance s_1 | ctrl Abundance s_2 | ctrl Abundance s_3 | ctrl Abundance s_4 | JAM-A KO Abundance s_1 | JAM-A KO Abundance s_2 | JAM-A KO Abundance s_3 | JAM-A KO Abundance s_4 |
|------|-----------|-------------------------------------------------------------------------------|---------------|--------------|------------|--------|-------------------|-------------------------|---------------------------------|----------------------------------------------|------------------------------------------|------------------|--------------------|--------------------|--------------------|--------------------|------------------------|------------------------|------------------------|------------------------|
| 976  | P50552    | Vasodilator-stimulated phosphoprotein [OS=Homo sapiens]                       | 44.3          | 17           | 5          | 142    | 5                 | 1090                    | 142                             | 5                                            | 5                                        | 0                | 1.51.E+08          | 1.62.E+08          | 1.54.E+08          | 1.78.E+08          | 1.30.E+08              | 1.31.E+08              | 1.36.E+08              | 1.54.E+08              |
| 977  | Q14137    | Ribosome biogenesis protein BOP1 [OS=Homo sapiens]                            | 44.3          | 13           | 6          | 67     | 6                 | 959                     | 77                              | 6                                            | 6                                        | 0                | 1.13.E+08          | 8.41.E+07          | 7.12.E+07          | 1.28.E+08          | 1.28.E+08              | 9.20.E+07              | 9.47.E+07              | 1.02.E+08              |
| 978  | P84090    | Enhancer of rudimentary homolog [OS=Homo sapiens]                             | 44.2          | 49           | 5          | 201    | 5                 | 4206                    | 182                             | 4                                            | 5                                        | 0                | 5.35.E+08          | 5.16.E+08          | 5.35.E+08          | 4.86.E+08          | 6.66.E+08              | 6.49.E+08              | 6.84.E+08              | 6.75.E+08              |
| 979  | Q9NZ01-1  | Very-long-chain enoyl-CoA reductase [OS=Homo sapiens]                         | 44.0          | 23           | 7          | 170    | 7                 | 867                     | 144                             | 7                                            | 7                                        | 0                | 3.14.E+08          | 2.99.E+08          | 3.13.E+08          | 3.43.E+08          | 3.45.E+08              | 3.74.E+08              | 4.01.E+08              | 3.65.E+08              |
| 980  | P30042-1  | ES1 protein homolog, mitochondrial [OS=Homo sapiens]                          | 43.7          | 48           | 6          | 104    | 6                 | 691                     | 138                             | 6                                            | 4                                        | 0                | 1.48.E+08          | 1.61.E+08          | 1.47.E+08          | 1.65.E+08          | 1.62.E+08              | 1.75.E+08              | 1.43.E+08              | 1.57.E+08              |
| 981  | Q9UJ50    | Calcium-binding mitochondrial carrier protein Aralar2 [OS=Homo sapiens]       | 43.5          | 21           | 8          | 93     | 5                 | 681                     | 87                              | 8                                            | 8                                        | 3                | 1.29.E+08          | 1.49.E+08          | 1.36.E+08          | 1.44.E+08          | 1.45.E+08              | 1.41.E+08              | 1.42.E+08              | 1.18.E+08              |
| 982  | Q12788    | Transducin beta-like protein 3 [OS=Homo sapiens]                              | 43.5          | 10           | 5          | 52     | 5                 | 572                     | 50                              | 5                                            | 5                                        | 0                | 5.79.E+07          | 6.79.E+07          | 4.94.E+07          | 6.95.E+07          | 5.62.E+07              | 5.07.E+07              | 3.18.E+07              | 5.72.E+07              |
| 983  | P00492    | Hypoxanthine-guanine phosphoribosyltransferase [OS=Homo sapiens]              | 43.3          | 40           | 6          | 134    | 6                 | 1573                    | 156                             | 6                                            | 6                                        | 0                | 2.03.E+08          | 1.94.E+08          | 1.98.E+08          | 1.91.E+08          | 2.21.E+08              | 2.12.E+08              | 2.18.E+08              | 2.23.E+08              |
| 984  | Q8N857    | Protein enabled homolog [OS=Homo sapiens]                                     | 43.3          | 14           | 5          | 189    | 5                 | 1749                    | 121                             | 5                                            | 5                                        | 0                | 2.22.E+08          | 2.18.E+08          | 2.28.E+08          | 2.47.E+08          | 2.70.E+08              | 2.39.E+08              | 2.46.E+08              | 2.23.E+08              |
| 985  | Q9Y4P3    | Transducin beta-like protein 2 [OS=Homo sapiens]                              | 43.3          | 18           | 6          | 109    | 6                 | 981                     | 117                             | 5                                            | 6                                        | 0                | 1.80.E+08          | 1.50.E+08          | 1.74.E+08          | 1.83.E+08          | 1.74.E+08              | 1.79.E+08              | 1.85.E+08              | 1.46.E+08              |
| 986  | Q16543    | Hsp90 co-chaperone Cdc37 [OS=Homo sapiens]                                    | 43.2          | 28           | 8          | 148    | 8                 | 1309                    | 163                             | 8                                            | 8                                        | 0                | 1.87.E+08          | 2.02.E+08          | 1.82.E+08          | 1.80.E+08          | 2.00.E+08              | 2.29.E+08              | 2.06.E+08              | 2.03.E+08              |
| 987  | P12955    | xa-Pro dipeptidase [OS=Homo sapiens]                                          | 43.1          | 19           | 4          | 78     | 4                 | 980                     | 97                              | 4                                            | 4                                        | 0                | 5.41.E+07          | 6.69.E+07          | 5.27.E+07          | 5.48.E+07          | 3.82.E+07              | 2.99.E+07              | 2.90.E+07              | 3.19.E+07              |
| 988  | Q13177    | Serine/threonine-protein kinase PAK 2 [OS=Homo sapiens]                       | 43.1          | 24           | 8          | 58     | 8                 | 290                     | 44                              | 7                                            | 8                                        | 0                | 8.11.E+07          | 1.16.E+08          | 9.29.E+07          | 9.41.E+07          | 1.77.E+08              | 1.74.E+08              | 1.81.E+08              | 2.05.E+08              |
| 989  | Q92747    | Actin-related protein 2/3 complex subunit 1A [OS=Homo sapiens]                | 43.1          | 15           | 3          | 100    | 2                 | 2171                    | 96                              | 2                                            | 3                                        | 0                | 4.99.E+07          | 4.64.E+07          | 4.74.E+07          | 5.64.E+07          | 8.82.E+07              | 8.22.E+07              | 7.80.E+07              | 7.78.E+07              |
| 990  | Q03252    | Lamin-B2 [OS=Homo sapiens]                                                    | 43.1          | 13           | 7          | 184    | 6                 | 1678                    | 134                             | 7                                            | 7                                        | 0                | 1.13.E+08          | 1.14.E+08          | 1.25.E+08          | 1.18.E+08          | 1.31.E+08              | 1.33.E+08              | 1.33.E+08              | 1.34.E+08              |
| 991  | P28072    | Proteasome subunit beta type-6 [OS=Homo sapiens]                              | 42.9          | 34           | 5          | 343    | 5                 | 2788                    | 483                             | 5                                            | 5                                        | 0                | 3.31.E+08          | 3.20.E+08          | 3.44.E+08          | 3.35.E+08          | 3.33.E+08              | 3.37.E+08              | 3.57.E+08              | 3.49.E+08              |
| 992  | P22695    | Cytochrome b-c1 complex subunit 2, mitochondrial [OS=Homo sapiens]            | 42.9          | 18           | 5          | 118    | 5                 | 2016                    | 208                             | 5                                            | 5                                        | 0                | 1.31.E+08          | 1.30.E+08          | 1.44.E+08          | 1.31.E+08          | 1.38.E+08              | 1.34.E+08              | 1.60.E+08              | 1.45.E+08              |
| 993  | P59998    | Actin-related protein 2/3 complex subunit 4 [OS=Homo sapiens]                 | 42.8          | 41           | 6          | 175    | 6                 | 1965                    | 165                             | 5                                            | 6                                        | 0                | 5.19.E+08          | 5.33.E+08          | 5.48.E+08          | 4.97.E+08          | 5.52.E+08              | 5.94.E+08              | 5.94.E+08              | 5.48.E+08              |
| 994  | P23258    | tubulin gamma-1 chain [OS=Homo sapiens]                                       | 42.7          | 27           | 6          | 89     | 6                 | 398                     | 55                              | 6                                            | 6                                        | 0                | 1.10.E+08          | 1.31.E+08          | 1.43.E+08          | 1.37.E+08          | 1.19.E+08              | 1.07.E+08              | 1.01.E+08              | 1.34.E+08              |
| 995  | P61201-1  | COP9 signalosome complex subunit 2 [OS=Homo sapiens]                          | 42.6          | 20           | 6          | 170    | 1                 | 2656                    | 181                             | 6                                            | 6                                        | 5                | 1.52.E+08          | 1.46.E+08          | 1.45.E+08          | 1.38.E+08          | 1.07.E+08              | 1.09.E+08              | 1.40.E+08              | 8.86.E+07              |
| 996  | Q9NZ18    | Insulin-like growth factor 2 mRNA-binding protein 1 [OS=Homo sapiens]         | 42.4          | 15           | 6          | 67     | 5                 | 587                     | 82                              | 6                                            | 5                                        | 0                | 7.22.E+07          | 7.40.E+07          | 6.32.E+07          | 7.85.E+07          | 9.33.E+07              | 1.03.E+08              | 7.35.E+07              | 9.88.E+07              |
| 997  | Q43684    | Mitotic checkpoint protein BUB3 [OS=Homo sapiens]                             | 42.4          | 25           | 6          | 229    | 6                 | 2784                    | 198                             | 6                                            | 6                                        | 0                | 1.45.E+08          | 1.50.E+08          | 1.46.E+08          | 1.46.E+08          | 1.67.E+08              | 1.68.E+08              | 1.61.E+08              | 1.65.E+08              |
| 998  | Q75937    | DnaJ homolog subfamily C member 8 [OS=Homo sapiens]                           | 42.4          | 28           | 4          | 162    | 4                 | 960                     | 200                             | 4                                            | 4                                        | 0                | 1.19.E+08          | 1.19.E+08          | 1.21.E+08          | 1.19.E+08          | 1.69.E+08              | 1.65.E+08              | 1.38.E+08              | 1.69.E+08              |
| 999  | P20340-1  | Ras-related protein Rab-6A [OS=Homo sapiens]                                  | 42.4          | 42           | 8          | 398    | 1                 | 4557                    | 381                             | 7                                            | 6                                        | 7.21.E+08        | 6.97.E+08          | 7.04.E+08          | 6.54.E+08          | 8.06.E+08          | 7.06.E+08              | 8.04.E+08              | 7.62.E+08              |                        |
| 1000 | Q14116    | Interleukin-18 [OS=Homo sapiens]                                              | 42.1          | 47           | 6          | 93     | 6                 | 689                     | 92                              | 5                                            | 5                                        | 0                | 1.13.E+08          | 1.06.E+08          | 7.60.E+07          | 1.14.E+08          | 3.37.E+08              | 3.38.E+08              | 3.10.E+08              | 3.45.E+08              |
| 1001 | Q99436    | Proteasome subunit beta type-7 [OS=Homo sapiens]                              | 42.1          | 37           | 5          | 147    | 5                 | 1898                    | 214                             | 5                                            | 5                                        | 0                | 1.56.E+08          | 1.70.E+08          | 1.62.E+08          | 1.58.E+08          | 1.50.E+08              | 1.51.E+08              | 1.46.E+08              | 1.46.E+08              |
| 1002 | Q02750    | Dual specificity mitogen-activated protein kinase kinase 1 [OS=Homo sapiens]  | 42.1          | 12           | 3          | 150    | 1                 | 2764                    | 179                             | 3                                            | 3                                        | 0                | 1.76.E+07          | 1.61.E+07          | 1.63.E+07          | 1.39.E+07          | 1.49.E+07              | 1.49.E+07              | 1.50.E+07              | 1.45.E+07              |
| 1003 | P04183    | Thymidine kinase, cytosolic [OS=Homo sapiens]                                 | 42.0          | 35           | 6          | 218    | 6                 | 1206                    | 208                             | 6                                            | 6                                        | 0                | 1.18.E+08          | 1.64.E+08          | 1.42.E+08          | 1.84.E+08          | 1.08.E+08              | 7.52.E+07              | 1.25.E+08              | 1.38.E+08              |
| 1004 | Q96IU4    | Protein ABHD14B [OS=Homo sapiens]                                             | 41.8          | 47           | 6          | 129    | 6                 | 823                     | 131                             | 6                                            | 5                                        | 0                | 1.56.E+08          | 1.63.E+08          | 1.62.E+08          | 1.56.E+08          | 2.25.E+08              | 2.31.E+08              | 2.39.E+08              | 2.46.E+08              |
| 1005 | Q8WUM0    | Nuclear pore complex protein Nup133 [OS=Homo sapiens]                         | 41.8          | 11           | 6          | 121    | 6                 | 1449                    | 143                             | 6                                            | 6                                        | 0                | 8.38.E+07          | 8.70.E+07          | 7.24.E+07          | 8.99.E+07          | 8.61.E+07              | 8.20.E+07              | 5.89.E+07              | 7.41.E+07              |
| 1006 | P09758    | Tumor-associated calcium signal transducer 2 [OS=Homo sapiens]                | 41.7          | 22           | 4          | 81     | 4                 | 1086                    | 124                             | 4                                            | 4                                        | 0                | 8.82.E+07          | 8.24.E+07          | 8.02.E+07          | 8.82.E+07          | 1.38.E+08              | 1.46.E+08              | 1.35.E+08              | 1.37.E+08              |
| 1007 | Q9NP72    | Ras-related protein Rab-18 [OS=Homo sapiens]                                  | 41.7          | 40           | 6          | 93     | 6                 | 782                     | 115                             | 6                                            | 5                                        | 0                | 5.50.E+07          | 8.12.E+07          | 7.35.E+07          | 8.01.E+07          | 2.35.E+08              | 1.97.E+08              | 1.98.E+08              | 2.19.E+08              |
| 1008 | O00116    | Alkylidihydroxyacetonephosphate synthase, peroxisomal [OS=Homo sapiens]       | 41.6          | 16           | 6          | 69     | 6                 | 337                     | 50                              | 6                                            | 6                                        | 0                | 8.24.E+07          | 7.16.E+07          | 7.91.E+07          | 8.65.E+07          | 1.06.E+08              | 7.92.E+07              | 8.25.E+07              | 9.97.E+07              |
| 1009 | P46379-1  | Large proline-rich protein BAG6 [OS=Homo sapiens]                             | 41.6          | 9            | 5          | 124    | 5                 | 1039                    | 160                             | 5                                            | 5                                        | 0                | 1.09.E+08          | 9.41.E+07          | 7.10.E+07          | 8.13.E+07          | 9.68.E+07              | 8.09.E+07              | 1.04.E+08              | 9.63.E+07              |
| 1010 | P49023    | Paxillin [OS=Homo sapiens]                                                    | 41.6          | 15           | 5          | 105    | 5                 | 779                     | 92                              | 5                                            | 5                                        | 0                | 5.91.E+07          | 6.25.E+07          | 6.29.E+07          | 6.69.E+07          | 6.49.E+07              | 6.55.E+07              | 3.84.E+07              | 6.42.E+07              |
| 1011 | Q15631-1  | Translin [OS=Homo sapiens]                                                    | 41.5          | 25           | 5          | 142    | 5                 | 1022                    | 170                             | 5                                            | 5                                        | 0                | 9.77.E+07          | 1.07.E+08          | 1.10.E+08          | 9.39.E+07          | 1.91.E+08              | 1.94.E+08              | 1.70.E+08              | 1.86.E+08              |
| 1012 | Q7Z2W4    | zinc finger CCH-type antiviral protein 1 [OS=Homo sapiens]                    | 41.4          | 13           | 8          | 58     | 8                 | 428                     | 50                              | 8                                            | 8                                        | 0                | 1.47.E+08          | 1.42.E+08          | 1.33.E+08          | 1.98.E+08          | 1.52.E+08              | 1.52.E+08              | 1.48.E+08              | 1.32.E+08              |
| 1013 | Q00325-2  | Isoform B of Phosphate carrier protein, mitochondrial [OS=Homo sapiens]       | 41.2          | 24           | 7          | 136    | 7                 |                         | 291                             | 7                                            |                                          | 0                | 8.13.E+08          | 7.95.E+08          | 7.83.E+08          | 8.50.E+08          | 7.50.E+08              | 7.47.E+08              | 7.76.E+08              | 7.29.E+08              |
| 1014 | P07602-1  | Prosaposin [OS=Homo sapiens]                                                  | 41.2          | 10           | 6          | 509    | 6                 | 4973                    | 560                             | 6                                            | 6                                        | 0                | 6.68.E+08          | 6.75.E+08          | 6.12.E+08          | 6.90.E+08          | 5.95.E+08              | 6.16.E+08              | 5.82.E+08              | 6.08.E+08              |
| 1015 | Q9UL25    | Ras-related protein Rab-21 [OS=Homo sapiens]                                  | 41.2          | 13           | 3          | 146    | 3                 | 2049                    | 147                             | 3                                            | 3                                        | 0                | 6.67.E+07          | 6.24.E+07          | 5.82.E+07          | 5.39.E+07          | 6.24.E+07              | 6.88.E+07              | 7.01.E+07              | 7.04.E+07              |
| 1016 | P20340-2  | Isoform 2 of Ras-related protein Rab-6A [OS=Homo sapiens]                     | 41.2          | 47           | 8          | 204    | 1                 |                         | 402                             | 8                                            |                                          | 0                | 1.73.E+07          | 1.83.E+07          | 1.50.E+07          | 9.68.E+06          | 3.86.E+07              | 2.74.E+07              | 2.45.E+07              | 3.38.E+07              |
| 1017 | P31153    | S-adenosylmethionine synthase isoform type-2 [OS=Homo sapiens]                | 41.1          | 13           | 4          | 198    | 4                 | 2874                    | 220                             | 4                                            | 4                                        | 0                | 2.58.E+08          | 2.51.E+08          | 2.61.E+08          | 2.25.E+08          | 2.20.E+08              | 2.13.E+08              | 2.34.E+08              | 2.14.E+08              |
| 1018 | P04899-1  | guanine nucleotide-binding protein G(i) subunit alpha-2 [OS=Homo sapiens]     | 41.1          | 18           | 5          | 120    | 2                 | 943                     | 154                             | 5                                            | 5                                        | 0                | 2.12.E+07          | 2.26.E+07          | 2.24.E+07          | 2.47.E+07          | 2.42.E+07              | 2.53.E+07              | 2.39.E+07              | 2.09.E+07              |
| 1019 | Q9UKV3-1  | Apoptotic chromatin condensation inducer in the nucleus [OS=Homo sapiens]     | 41.1          | 9            | 8          | 98     | 8                 | 257                     | 85                              | 8                                            | 8                                        | 0                | 1.17.E+08          | 1.17.E+08          | 1.23.E+08          | 1.30.E+08          | 1.30.E+08              | 1.25.E+08              | 1.13.E+08              | 1.20.E+08              |
| 1020 | Q9NYU2-1  | UDP-glucose:glycoprotein complexyltransferase 1 [OS=Homo sapiens]             | 41.0          | 8            | 7          | 100    | 7                 | 453                     | 47                              | 7                                            | 7                                        | 0                | 8.87.E+07          | 9.85.E+07          | 9.16.E+07          | 9.27.E+07          | 1.16.E+08              | 1.30.E+08              | 1.49.E+08              | 1.17.E+08              |
| 1021 | Q13098    | COP9 signalosome complex subunit 1 [OS=Homo sapiens]                          | 40.9          | 20           | 7          | 108    | 7                 | 509                     | 79                              | 7                                            | 7                                        | 0                | 3.20.E+08          | 2.83.E+08          | 2.99.E+08          | 2.62.E+08          | 2.99.E+08              | 3.24.E+08              | 3.35.E+08              | 3.23.E+08              |
| 1022 | Q01081    | Splicing factor U2AF 35 kDa subunit [OS=Homo sapiens]                         | 40.8          | 15           | 4          | 138    | 4                 | 2769                    | 86                              | 2                                            | 4                                        | 0                | 1.62.E+08          | 1.70.E+08          | 1.68.E+08          | 1.58.E+08          | 1.70.E+08              | 1.64.E+08              | 1.65.E+08              | 1.68.E+08              |
| 1023 | P17096-1  | High mobility group protein HMG-1/HMG-Y [OS=Homo sapiens]                     | 40.8          | 23           | 2          | 181    | 2                 | 1518                    | 328                             | 2                                            | 2                                        | 0                | 2.27.E+08          | 2.13.E+08          | 2.29.E+08          | 2.74.E+08          | 1.73.E+08              | 1.50.E+08              | 1.69.E+08              | 1.76.E+08              |
| 1024 | Q969Z0-1  | Protein TBRG4 [OS=Homo sapiens]                                               | 40.8          | 16           | 4          | 68     | 4                 | 991                     | 97                              | 4                                            | 4                                        | 0                | 5.57.E+07          | 7.19.E+07          | 5.87.E+07          | 7.07.E+07          | 5.77.E+07              | 5.19.E+07              | 4.52.E+07              | 5.28.E+07              |
| 1025 | Q96EP5    | DAZ-associated protein 1 [OS=Homo sapiens]                                    | 40.8          | 19           | 5          | 138    | 5                 | 2132                    | 183                             | 5                                            | 5                                        | 0                | 1.41.E+08          | 1.46.E+08          | 1.53.E+08          | 1.48.E+08          | 1.79.E+08              | 1.75.E+08              | 1.39.E+08              | 1.77.E+08              |
| 1026 | O95782    | AP-2 complex subunit alpha-1 [OS=Homo sapiens]                                | 40.6          | 12           | 8          | 126    | 4                 | 1518                    | 142                             | 7                                            | 8                                        | 0                | 5.98.E+07          | 5.95.E+07          | 6.11.E+07          | 5.75.E+07          | 5.32.E+07              | 3.97.E+07              | 5.82.E+07              | 5.05.E+07              |
| 1027 | P53999    | Activated RNA polymerase II transcriptional coactivator p15 [OS=Homo sapiens] | 40.6          | 20           | 4          | 330    | 4                 | 6274                    | 536                             | 4                                            | 4                                        | 0                | 4.36.E+08          | 4.48.E+08          | 4.46.E+08          | 4.70.E+08          | 5.07.E+08              | 4.95.E+08              | 4.94.E+08              | 5.05.E+08              |

| No.  | Accession | Description                                                                          | Sum PEP Score | Coverage [%] | # Peptides | # PSMs | # Unique Peptides | Score Mascot: A5 Mascot | Score Sequest HT: A2 Sequest HT | # Peptides (by Search Engine): A2 Sequest HT | # Peptides (by Search Engine): A5 Mascot | # Razor Peptides | ctrl Abundance_s_1 | ctrl Abundance_s_2 | ctrl Abundance_s_3 | ctrl Abundance_s_4 | JAM-A KO Abundance_s_1 | JAM-A KO Abundance_s_2 | JAM-A KO Abundance_s_3 | JAM-A KO Abundance_s_4 |
|------|-----------|--------------------------------------------------------------------------------------|---------------|--------------|------------|--------|-------------------|-------------------------|---------------------------------|----------------------------------------------|------------------------------------------|------------------|--------------------|--------------------|--------------------|--------------------|------------------------|------------------------|------------------------|------------------------|
| 1028 | P24539    | ATP synthase F(0) complex subunit B1, mitochondrial [OS=Homo sapiens]                | 40.5          | 16           | 3          | 202    | 3                 | 2160                    | 262                             | 3                                            | 3                                        | 0                | 2.39.E+08          | 2.35.E+08          | 2.53.E+08          | 2.79.E+08          | 2.52.E+08              | 2.31.E+08              | 2.68.E+08              | 2.51.E+08              |
| 1029 | Q8TDB8-1  | Solute carrier family 2, facilitated glucose transporter member 14 [OS=Homo sapiens] | 40.5          | 10           | 5          | 306    | 4                 | 2415                    | 212                             | 5                                            | 4                                        | 0                | 5.52.E+08          | 5.41.E+08          | 5.20.E+08          | 5.39.E+08          | 4.39.E+08              | 4.54.E+08              | 1.59.E+08              | 4.80.E+08              |
| 1030 | Q9BZX2-1  | Uridine-cytidine kinase 2 [OS=Homo sapiens]                                          | 40.5          | 26           | 4          | 48     | 4                 | 391                     | 62                              | 4                                            | 4                                        | 0                | 5.77.E+07          | 6.66.E+07          | 6.24.E+07          | 6.06.E+07          | 2.74.E+07              | 2.32.E+07              | 5.07.E+06              | 2.16.E+07              |
| 1031 | Q8NF37    | Lysophosphatidylcholine acyltransferase 1 [OS=Homo sapiens]                          | 40.4          | 12           | 5          | 186    | 5                 | 3081                    | 210                             | 4                                            | 5                                        | 0                | 1.10.E+08          | 1.20.E+08          | 1.06.E+08          | 1.10.E+08          | 1.32.E+08              | 1.36.E+08              | 1.25.E+08              | 1.51.E+08              |
| 1032 | P53041    | Serine/threonine-protein phosphatase 5 [OS=Homo sapiens]                             | 40.2          | 11           | 4          | 82     | 4                 | 1939                    | 127                             | 4                                            | 4                                        | 0                | 1.19.E+08          | 1.26.E+08          | 1.17.E+08          | 1.12.E+08          | 7.96.E+07              | 8.86.E+07              | 5.93.E+07              | 7.59.E+07              |
| 1033 | Q14CN4-1  | Keratin, type II cytoskeletal 72 [OS=Homo sapiens]                                   | 40.1          | 4            | 5          | 747    | 1                 | 6040                    | 765                             | 5                                            | 5                                        | 0                | 2.07.E+07          | 1.97.E+07          | 2.08.E+07          | 2.40.E+07          | 8.06.E+06              | 7.71.E+06              | 8.14.E+06              | 8.20.E+06              |
| 1034 | P14735    | insulin-degrading enzyme [OS=Homo sapiens]                                           | 40.0          | 13           | 9          | 127    | 9                 | 830                     | 139                             | 9                                            | 8                                        | 0                | 1.52.E+08          | 1.67.E+08          | 1.43.E+08          | 1.64.E+08          | 2.08.E+08              | 2.45.E+08              | 2.06.E+08              | 1.98.E+08              |
| 1035 | Q8NE71-1  | ATP-binding cassette sub-family F member 1 [OS=Homo sapiens]                         | 39.9          | 17           | 7          | 156    | 7                 | 1092                    | 197                             | 7                                            | 7                                        | 0                | 1.42.E+08          | 9.51.E+07          | 1.26.E+08          | 8.53.E+07          | 1.12.E+08              | 1.06.E+08              | 1.44.E+08              | 1.65.E+08              |
| 1036 | Q04837    | Single-stranded DNA-binding protein, mitochondrial [OS=Homo sapiens]                 | 39.9          | 41           | 4          | 119    | 4                 | 2155                    | 174                             | 4                                            | 4                                        | 0                | 1.33.E+08          | 1.36.E+08          | 1.24.E+08          | 1.31.E+08          | 1.33.E+08              | 1.41.E+08              | 1.35.E+08              | 1.29.E+08              |
| 1037 | Q9H8Y8-1  | Golgi reassembly-stacking protein 2 [OS=Homo sapiens]                                | 39.8          | 13           | 3          | 114    | 3                 | 3323                    | 187                             | 3                                            | 3                                        | 0                | 1.08.E+08          | 1.08.E+08          | 9.58.E+07          | 1.00.E+08          | 1.36.E+08              | 1.32.E+08              | 1.03.E+08              | 1.21.E+08              |
| 1038 | P22061    | protein-L-isoaspartate(D-aspartate) O-methyltransferase [OS=Homo sapiens]            | 39.8          | 43           | 5          | 98     | 5                 | 1240                    | 149                             | 5                                            | 5                                        | 0                | 1.22.E+08          | 1.21.E+08          | 1.23.E+08          | 1.24.E+08          | 1.21.E+08              | 1.21.E+08              | 1.23.E+08              | 1.27.E+08              |
| 1039 | Q13363-1  | C-terminal-binding protein 1 [OS=Homo sapiens]                                       | 39.8          | 20           | 4          | 116    | 4                 | 2267                    | 188                             | 4                                            | 4                                        | 0                | 8.54.E+07          | 8.64.E+07          | 7.81.E+07          | 8.00.E+07          | 7.33.E+07              | 7.37.E+07              | 7.24.E+07              | 7.75.E+07              |
| 1040 | P36507    | Dual specificity mitogen-activated protein kinase kinase 2 [OS=Homo sapiens]         | 39.7          | 12           | 3          | 129    | 1                 | 2667                    | 177                             | 3                                            | 3                                        | 2                | 9.98.E+07          | 9.65.E+07          | 1.01.E+08          | 1.14.E+08          | 1.20.E+08              | 1.02.E+08              | 1.04.E+08              | 1.08.E+08              |
| 1041 | Q12797    | Aspartyl/Asparaginyl beta-hydroxylase [OS=Homo sapiens]                              | 39.6          | 14           | 5          | 119    | 5                 | 741                     | 132                             | 5                                            | 5                                        | 0                | 1.11.E+08          | 5.53.E+07          | 4.72.E+07          | 5.90.E+07          | 1.00.E+08              | 1.61.E+08              | 1.34.E+08              | 8.71.E+07              |
| 1042 | P20020-3  | Isoform B of Plasma membrane calcium-transporting ATPase 1 [OS=Homo sapiens]         | 39.5          | 8            | 6          | 74     | 6                 | 599                     | 77                              | 6                                            | 6                                        | 0                | 5.20.E+07          | 5.90.E+07          | 4.36.E+07          | 5.96.E+07          | 6.50.E+07              | 6.31.E+07              | 5.57.E+07              | 5.38.E+07              |
| 1043 | O60888-1  | Protein CutA [OS=Homo sapiens]                                                       | 39.5          | 3%           | 3          | 316    | 3                 | 6657                    | 661                             | 3                                            | 3                                        | 0                | 2.61.E+08          | 2.97.E+08          | 2.70.E+08          | 2.92.E+08          | 4.42.E+08              | 4.24.E+08              | 3.74.E+08              | 4.03.E+08              |
| 1044 | Q7Z7H8    | 39S ribosomal protein L10, mitochondrial [OS=Homo sapiens]                           | 39.4          | 23           | 2          | 84     | 2                 | 2195                    | 122                             | 2                                            | 2                                        | 0                | 3.74.E+07          | 3.13.E+07          | 3.22.E+07          | 3.42.E+07          | 2.94.E+07              | 2.06.E+07              | 2.20.E+07              | 2.47.E+07              |
| 1045 | Q9Y5M8    | signal recognition particle receptor subunit beta [OS=Homo sapiens]                  | 39.4          | 29           | 6          | 131    | 6                 | 525                     | 88                              | 5                                            | 6                                        | 0                | 1.05.E+08          | 1.03.E+08          | 9.97.E+07          | 1.00.E+08          | 7.40.E+07              | 9.88.E+07              | 1.00.E+08              | 1.00.E+08              |
| 1046 | Q9BVK6    | Transmembrane emp24 domain-containing protein 9 [OS=Homo sapiens]                    | 39.4          | 20           | 5          | 237    | 4                 | 2547                    | 273                             | 5                                            | 5                                        | 1                | 3.00.E+08          | 2.86.E+08          | 2.88.E+08          | 3.02.E+08          | 3.11.E+08              | 2.96.E+08              | 2.89.E+08              | 2.93.E+08              |
| 1047 | P62633-1  | Cellular nucleic acid-binding protein [OS=Homo sapiens]                              | 39.4          | 23           | 3          | 146    | 1                 | 1447                    | 105                             | 3                                            | 3                                        | 2                | 1.13.E+08          | 1.02.E+08          | 1.05.E+08          | 1.24.E+08          | 6.62.E+07              | 7.63.E+07              | 7.64.E+07              | 6.85.E+07              |
| 1048 | Q5SSJ5-1  | Heterochromatin protein 1-binding protein 3 [OS=Homo sapiens]                        | 39.4          | 17           | 5          | 121    | 5                 | 1840                    | 88                              | 4                                            | 5                                        | 0                | 8.35.E+07          | 1.08.E+08          | 9.61.E+07          | 1.30.E+08          | 9.88.E+07              | 9.38.E+07              | 1.02.E+08              | 1.15.E+08              |
| 1049 | Q9UNF0    | Protein kinase C and casein kinase substrate in neurons protein 2 [OS=Homo sapiens]  | 39.3          | 18           | 7          | 97     | 7                 | 300                     | 113                             | 7                                            | 6                                        | 0                | 2.47.E+08          | 2.31.E+08          | 2.46.E+08          | 2.35.E+08          | 2.61.E+08              | 2.66.E+08              | 2.99.E+08              | 2.75.E+08              |
| 1050 | O75964    | ATP synthase subunit g, mitochondrial [OS=Homo sapiens]                              | 39.3          | 48           | 4          | 183    | 4                 | 1850                    | 251                             | 4                                            | 4                                        | 0                | 4.16.E+08          | 4.33.E+08          | 4.33.E+08          | 3.77.E+08          | 4.11.E+08              | 4.30.E+08              | 4.32.E+08              | 4.44.E+08              |
| 1051 | Q9Y2Q3-1  | Glutathione S-transferase kappa 1 [OS=Homo sapiens]                                  | 39.1          | 32           | 5          | 82     | 5                 | 572                     | 57                              | 5                                            | 5                                        | 0                | 9.55.E+07          | 1.09.E+08          | 7.14.E+07          | 1.05.E+08          | 6.44.E+07              | 1.13.E+08              | 8.55.E+07              | 9.76.E+07              |
| 1052 | P49821    | NADH dehydrogenase [ubiquinone] flavoprotein 1, mitochondrial [OS=Homo sapiens]      | 39.1          | 23           | 5          | 127    | 5                 | 1113                    | 130                             | 5                                            | 5                                        | 0                | 8.57.E+07          | 9.62.E+07          | 8.38.E+07          | 1.12.E+08          | 1.08.E+08              | 1.03.E+08              | 9.61.E+07              | 1.17.E+08              |
| 1053 | P13861    | cAMP-dependent protein kinase type II-alpha regulatory subunit [OS=Homo sapiens]     | 39.0          | 17           | 4          | 64     | 4                 | 1250                    | 56                              | 3                                            | 4                                        | 0                | 4.63.E+07          | 4.80.E+07          | 4.90.E+07          | 4.69.E+07          | 5.34.E+07              | 5.24.E+07              | 5.03.E+07              | 5.10.E+07              |
| 1054 | P62854    | 40S ribosomal protein S26 [OS=Homo sapiens]                                          | 38.9          | 44           | 4          | 432    | 4                 | 4984                    | 468                             | 4                                            | 4                                        | 0                | 8.53.E+08          | 8.12.E+08          | 8.10.E+08          | 9.73.E+08          | 6.48.E+08              | 6.71.E+08              | 6.58.E+08              | 7.11.E+08              |
| 1055 | P48556    | 26S proteasome non-ATPase regulatory subunit 8 [OS=Homo sapiens]                     | 38.9          | 24           | 7          | 150    | 7                 | 1090                    | 121                             | 7                                            | 7                                        | 0                | 2.61.E+08          | 2.79.E+08          | 2.58.E+08          | 2.94.E+08          | 2.92.E+08              | 2.86.E+08              | 2.84.E+08              | 2.95.E+08              |
| 1056 | Q9BRA2    | Thioredoxin domain-containing protein 17 [OS=Homo sapiens]                           | 38.9          | 38           | 4          | 180    | 4                 | 2500                    | 229                             | 4                                            | 4                                        | 0                | 3.82.E+08          | 3.82.E+08          | 4.10.E+08          | 3.37.E+08          | 2.69.E+08              | 2.80.E+08              | 2.87.E+08              | 2.80.E+08              |
| 1057 | Q9UDY4    | DnaJ homolog subfamily B member 4 [OS=Homo sapiens]                                  | 38.9          | 21           | 4          | 167    | 3                 | 1332                    | 222                             | 4                                            | 4                                        | 0                | 6.07.E+07          | 6.69.E+07          | 6.02.E+07          | 6.63.E+07          | 6.86.E+07              | 7.20.E+07              | 6.22.E+07              | 6.90.E+07              |
| 1058 | P16144-1  | Integrin beta-4 [OS=Homo sapiens]                                                    | 38.9          | 5            | 6          | 74     | 6                 | 629                     | 85                              | 6                                            | 6                                        | 0                | 8.57.E+07          | 9.49.E+07          | 5.49.E+07          | 8.62.E+07          | 7.61.E+07              | 7.79.E+07              | 7.67.E+07              | 3.84.E+07              |
| 1059 | Q96AC1    | Fermitin family homolog 2 [OS=Homo sapiens]                                          | 38.9          | 19           | 5          | 110    | 5                 | 1800                    | 165                             | 5                                            | 5                                        | 0                | 5.00.E+07          | 5.12.E+07          | 4.23.E+07          | 5.50.E+07          | 6.27.E+07              | 7.46.E+07              | 6.51.E+07              | 6.74.E+07              |
| 1060 | Q9GZS3    | WD repeat-containing protein 61 [OS=Homo sapiens]                                    | 38.9          | 23           | 3          | 57     | 3                 | 1082                    | 64                              | 3                                            | 3                                        | 0                | 8.49.E+07          | 8.86.E+07          | 6.20.E+07          | 8.45.E+07          | 1.10.E+08              | 1.07.E+08              | 7.13.E+07              | 1.00.E+08              |
| 1061 | Q7RTV0    | PHD finger-like domain-containing protein 5A [OS=Homo sapiens]                       | 38.8          | 48           | 4          | 155    | 4                 | 2573                    | 194                             | 4                                            | 4                                        | 0                | 1.50.E+08          | 1.41.E+08          | 1.42.E+08          | 1.56.E+08          | 1.25.E+08              | 1.28.E+08              | 1.38.E+08              | 1.23.E+08              |
| 1062 | P61457    | Pterin-4-alpha-carbinolamine dehydratase [OS=Homo sapiens]                           | 38.8          | 70           | 5          | 218    | 5                 | 1266                    | 267                             | 5                                            | 5                                        | 0                | 3.79.E+08          | 3.60.E+08          | 3.68.E+08          | 3.30.E+08          | 3.09.E+08              | 3.04.E+08              | 3.23.E+08              | 3.02.E+08              |
| 1063 | Q9NQW6    | Anillin [OS=Homo sapiens]                                                            | 38.8          | 13           | 9          | 80     | 9                 | 243                     | 32                              | 9                                            | 8                                        | 0                | 7.30.E+07          | 8.24.E+07          | 7.65.E+07          | 7.59.E+07          | 8.49.E+07              | 8.67.E+07              | 8.62.E+07              | 8.51.E+07              |
| 1064 | Q9UHY7    | Enolase-phosphatase E1 [OS=Homo sapiens]                                             | 38.7          | 25           | 4          | 167    | 4                 | 993                     | 155                             | 4                                            | 4                                        | 0                | 1.65.E+08          | 1.75.E+08          | 1.53.E+08          | 1.79.E+08          | 1.65.E+08              | 1.41.E+08              | 1.05.E+08              | 1.45.E+08              |
| 1065 | O43865    | S-adenosylhomocysteine hydrolase-like protein 1 [OS=Homo sapiens]                    | 38.6          | 13           | 5          | 79     | 4                 | 367                     | 53                              | 5                                            | 5                                        | 0                | 5.97.E+07          | 5.76.E+07          | 5.86.E+07          | 6.63.E+07          | 9.89.E+07              | 9.14.E+07              | 9.67.E+07              | 9.95.E+07              |
| 1066 | Q9UL15-1  | BAG family molecular chaperone regulator 5 [OS=Homo sapiens]                         | 38.5          | 13           | 3          | 58     | 3                 | 1065                    | 80                              | 3                                            | 3                                        | 0                | 3.11.E+07          | 3.18.E+07          | 3.24.E+07          | 3.25.E+07          | 3.02.E+07              | 3.23.E+07              | 2.71.E+07              | 2.51.E+07              |
| 1067 | O00461    | Golgi integral membrane protein 4 [OS=Homo sapiens]                                  | 38.3          | 10           | 4          | 74     | 4                 | 751                     | 81                              | 4                                            | 4                                        | 0                | 4.22.E+07          | 4.66.E+07          | 3.71.E+07          | 3.87.E+07          | 6.95.E+07              | 5.93.E+07              | 5.69.E+07              | 5.22.E+07              |
| 1068 | Q14008    | Cytoskeleton-associated protein 5 [OS=Homo sapiens]                                  | 38.3          | 7            | 8          | 101    | 8                 | 610                     | 43                              | 8                                            | 8                                        | 0                | 5.70.E+07          | 5.68.E+07          | 5.43.E+07          | 5.52.E+07          | 7.69.E+07              | 7.37.E+07              | 7.35.E+07              | 7.57.E+07              |
| 1069 | P46778    | 60S ribosomal protein L21 [OS=Homo sapiens]                                          | 38.2          | 26           | 4          | 268    | 4                 | 3210                    | 333                             | 4                                            | 4                                        | 0                | 8.78.E+08          | 7.64.E+08          | 8.15.E+08          | 7.10.E+08          | 6.31.E+08              | 6.29.E+08              | 7.11.E+08              | 6.58.E+08              |
| 1070 | P83916    | Chromobox protein homolog 1 [OS=Homo sapiens]                                        | 38.2          | 56           | 8          | 84     | 7                 | 496                     | 80                              | 7                                            | 8                                        | 1                | 9.22.E+07          | 9.07.E+07          | 7.88.E+07          | 8.87.E+07          | 1.10.E+08              | 6.99.E+07              | 7.85.E+07              | 9.16.E+07              |
| 1071 | Q15717    | ELAV-like protein 1 [OS=Homo sapiens]                                                | 38.0          | 21           | 5          | 169    | 5                 | 2496                    | 231                             | 5                                            | 5                                        | 0                | 3.67.E+08          | 4.07.E+08          | 3.89.E+08          | 2.72.E+08          | 3.57.E+08              | 3.27.E+08              | 3.80.E+08              | 3.56.E+08              |
| 1072 | Q9BXJ9    | N-alpha-acetyltransferase 15, NatA auxiliary subunit [OS=Homo sapiens]               | 37.9          | 10           | 9          | 79     | 9                 | 156                     | 32                              | 8                                            | 9                                        | 0                | 1.37.E+08          | 1.40.E+08          | 1.35.E+08          | 1.56.E+08          | 1.57.E+08              | 1.55.E+08              | 1.21.E+08              | 1.56.E+08              |
| 1073 | O15260-1  | surfeit locus protein 4 [OS=Homo sapiens]                                            | 37.9          | 14           | 3          | 91     | 3                 | 3835                    | 35                              | 2                                            | 3                                        | 0                | 9.37.E+07          | 9.68.E+07          | 8.90.E+07          | 1.02.E+08          | 1.22.E+08              | 1.19.E+08              | 9.99.E+07              | 1.20.E+08              |
| 1074 | P61923    | Coatamer subunit zeta-1 [OS=Homo sapiens]                                            | 37.8          | 27           | 4          | 42     | 4                 | 683                     | 101                             | 4                                            | 4                                        | 0                | 1.67.E+08          | 1.74.E+08          | 1.69.E+08          | 1.71.E+08          | 2.13.E+08              | 2.18.E+08              | 1.83.E+08              | 2.14.E+08              |
| 1075 | P61077-1  | Ubiquitin-conjugating enzyme E2 D3 [OS=Homo sapiens]                                 | 37.8          | 29           | 2          | 204    | 2                 | 3943                    | 312                             | 2                                            | 2                                        | 0                | 1.03.E+08          | 1.14.E+08          | 1.13.E+08          | 1.16.E+08          | 1.28.E+08              | 1.09.E+08              | 1.07.E+08              | 1.21.E+08              |



| No.  | Accession | Description                                                                                                                | Sum PEP Score | Coverage [%] | # Peptides | # PSMs | # Unique Peptides | Score Mascot: A5 Mascot | Score Sequest HT: A2 Sequest HT | # Peptides (by Search Engine): A2 Sequest HT | # Peptides (by Search Engine): A5 Mascot | # Razor Peptides | ctrl Abundance s_1 | ctrl Abundance s_2 | ctrl Abundance s_3 | ctrl Abundance s_4 | JAM-A KO Abundance s_1 | JAM-A KO Abundance s_2 | JAM-A KO Abundance s_3 | JAM-A KO Abundance s_4 |
|------|-----------|----------------------------------------------------------------------------------------------------------------------------|---------------|--------------|------------|--------|-------------------|-------------------------|---------------------------------|----------------------------------------------|------------------------------------------|------------------|--------------------|--------------------|--------------------|--------------------|------------------------|------------------------|------------------------|------------------------|
| 1076 | Q95197    | Reticulon-3 [OS=Homo sapiens]                                                                                              | 37.7          | 5            | 2          | 88     | 1                 | 1458                    | 40                              | 1                                            | 2                                        | 1                | 1.03.E+08          | 9.64.E+07          | 1.11.E+08          | 1.15.E+08          | 1.52.E+08              | 1.22.E+08              | 1.39.E+08              | 1.39.E+08              |
| 1077 | Q9ULC4-1  | Malignant T-cell-amplified sequence 1 [OS=Homo sapiens]                                                                    | 37.6          | 36           | 4          | 225    | 4                 | 2676                    | 146                             | 4                                            | 4                                        | 0                | 8.39.E+07          | 9.69.E+07          | 8.78.E+07          | 7.55.E+07          | 8.89.E+07              | 8.67.E+07              | 8.89.E+07              | 8.56.E+07              |
| 1078 | Q96EY1-1  | DnaJ homolog subfamily A member 3, mitochondrial [OS=Homo sapiens]                                                         | 37.6          | 14           | 5          | 136    | 5                 | 2139                    | 165                             | 5                                            | 5                                        | 0                | 9.66.E+07          | 9.22.E+07          | 9.72.E+07          | 1.03.E+08          | 7.81.E+07              | 7.41.E+07              | 8.35.E+07              | 9.17.E+07              |
| 1079 | Q14839    | Chromodomain-helicase-DNA-binding protein 4 [OS=Homo sapiens]                                                              | 37.6          | 4            | 5          | 124    | 5                 | 1191                    | 149                             | 5                                            | 5                                        | 0                | 5.89.E+07          | 6.71.E+07          | 6.73.E+07          | 6.02.E+07          | 6.78.E+07              | 6.64.E+07              | 5.80.E+07              | 6.43.E+07              |
| 1080 | P62316    | Small nuclear ribonucleoprotein Sm D2 [OS=Homo sapiens]                                                                    | 37.5          | 46           | 7          | 121    | 7                 | 774                     | 109                             | 6                                            | 7                                        | 0                | 3.63.E+08          | 3.90.E+08          | 3.71.E+08          | 4.35.E+08          | 3.33.E+08              | 3.85.E+08              | 3.76.E+08              | 3.54.E+08              |
| 1081 | O15382    | Branched-chain-amino-acid aminotransferase, mitochondrial [OS=Homo sapiens]                                                | 37.4          | 25           | 5          | 56     | 5                 | 940                     | 74                              | 5                                            | 5                                        | 0                | 7.95.E+07          | 7.20.E+07          | 7.41.E+07          | 7.78.E+07          | 4.43.E+07              | 4.13.E+07              | 4.35.E+07              | 4.07.E+07              |
| 1082 | Q07666    | KH domain-containing, RNA-binding, signal transduction-associated protein 1 [OS=Homo sapiens]                              | 37.4          | 12           | 5          | 197    | 5                 | 1565                    | 154                             | 5                                            | 5                                        | 0                | 1.91.E+08          | 1.96.E+08          | 1.97.E+08          | 2.15.E+08          | 2.25.E+08              | 2.40.E+08              | 2.36.E+08              | 2.40.E+08              |
| 1083 | O00743    | Serine/threonine-protein phosphatase 6 catalytic subunit [OS=Homo sapiens]                                                 | 37.4          | 22           | 5          | 58     | 5                 | 606                     | 36                              | 4                                            | 5                                        | 0                | 7.82.E+07          | 6.41.E+07          | 7.79.E+07          | 6.01.E+07          | 7.59.E+07              | 7.79.E+07              | 8.44.E+07              | 7.93.E+07              |
| 1084 | Q5TFE4    | 5'-nucleotidase domain-containing protein 1 [OS=Homo sapiens]                                                              | 37.3          | 23           | 5          | 101    | 5                 | 772                     | 44                              | 4                                            | 4                                        | 0                | 7.85.E+07          | 7.25.E+07          | 6.74.E+07          | 6.59.E+07          | 8.97.E+07              | 6.97.E+07              | 4.30.E+07              | 8.18.E+07              |
| 1085 | P10515    | Dihydrolypoyllysine-residue acetyltransferase component of pyruvate dehydrogenase complex, mitochondrial [OS=Homo sapiens] | 37.1          | 18           | 7          | 101    | 7                 | 454                     | 68                              | 7                                            | 7                                        | 0                | 1.33.E+08          | 1.37.E+08          | 1.32.E+08          | 1.63.E+08          | 1.36.E+08              | 1.34.E+08              | 1.45.E+08              | 1.43.E+08              |
| 1086 | O75436-1  | Vacuolar protein sorting-associated protein 26A [OS=Homo sapiens]                                                          | 37.1          | 19           | 4          | 96     | 4                 | 1326                    | 120                             | 4                                            | 4                                        | 0                | 9.90.E+07          | 9.54.E+07          | 9.23.E+07          | 9.62.E+07          | 1.23.E+08              | 1.24.E+08              | 1.04.E+08              | 1.17.E+08              |
| 1087 | Q3ZCQ8    | Mitochondrial import inner membrane translocase subunit TIM50 [OS=Homo sapiens]                                            | 37.0          | 17           | 4          | 68     | 4                 | 1344                    | 82                              | 4                                            | 4                                        | 0                | 5.78.E+07          | 6.78.E+07          | 4.52.E+07          | 5.50.E+07          | 5.83.E+07              | 5.01.E+07              | 4.82.E+07              | 5.05.E+07              |
| 1088 | P82979    | SAP domain-containing ribonucleoprotein [OS=Homo sapiens]                                                                  | 37.0          | 33           | 6          | 108    | 6                 | 1995                    | 113                             | 6                                            | 6                                        | 0                | 1.62.E+08          | 1.60.E+08          | 1.61.E+08          | 1.64.E+08          | 1.71.E+08              | 1.82.E+08              | 1.77.E+08              | 1.69.E+08              |
| 1089 | P83731    | 60S ribosomal protein L24 [OS=Homo sapiens]                                                                                | 36.9          | 29           | 6          | 384    | 6                 | 5481                    | 475                             | 6                                            | 6                                        | 0                | 1.24.E+09          | 1.26.E+09          | 1.26.E+09          | 1.11.E+09          | 1.06.E+09              | 1.14.E+09              | 1.13.E+09              | 1.07.E+09              |
| 1090 | Q9GZR7    | ATP-dependent RNA helicase DDX24 [OS=Homo sapiens]                                                                         | 36.9          | 12           | 8          | 122    | 8                 | 201                     | 61                              | 8                                            | 7                                        | 0                | 1.02.E+08          | 9.42.E+07          | 1.07.E+08          | 1.06.E+08          | 1.21.E+08              | 1.15.E+08              | 1.22.E+08              | 1.10.E+08              |
| 1091 | P51572    | B-cell receptor-associated protein 31 [OS=Homo sapiens]                                                                    | 36.9          | 12           | 2          | 152    | 2                 | 1687                    | 181                             | 2                                            | 2                                        | 0                | 2.54.E+08          | 2.46.E+08          | 2.60.E+08          | 2.52.E+08          | 2.35.E+08              | 2.51.E+08              | 2.73.E+08              | 2.51.E+08              |
| 1092 | P25685    | dnaJ homolog subfamily B member 1 [OS=Homo sapiens]                                                                        | 36.8          | 19           | 5          | 164    | 4                 | 2128                    | 191                             | 5                                            | 5                                        | 1                | 1.58.E+08          | 1.63.E+08          | 1.31.E+08          | 1.50.E+08          | 9.83.E+07              | 1.04.E+08              | 9.86.E+07              | 1.07.E+08              |
| 1093 | Q9UBN7-1  | histone deacetylase 6 [OS=Homo sapiens]                                                                                    | 36.8          | 4            | 2          | 58     | 2                 | 648                     | 93                              | 2                                            | 2                                        | 0                | 3.04.E+07          | 2.90.E+07          | 2.40.E+07          | 2.49.E+07          | 2.75.E+07              | 2.31.E+07              | 2.21.E+07              | 2.56.E+07              |
| 1094 | O00487    | 26S proteasome non-ATPase regulatory subunit 14 [OS=Homo sapiens]                                                          | 36.7          | 27           | 5          | 170    | 5                 | 1589                    | 195                             | 5                                            | 5                                        | 0                | 8.56.E+07          | 2.02.E+08          | 2.11.E+08          | 1.70.E+08          | 6.93.E+07              | 1.00.E+08              | 1.11.E+08              | 1.74.E+08              |
| 1095 | Q6DKI1    | 60S ribosomal protein L7-like 1 [OS=Homo sapiens]                                                                          | 36.7          | 29           | 5          | 121    | 5                 | 568                     | 80                              | 5                                            | 5                                        | 0                | 1.13.E+08          | 9.99.E+07          | 1.05.E+08          | 1.13.E+08          | 8.28.E+07              | 7.95.E+07              | 7.30.E+07              | 7.22.E+07              |
| 1096 | Q13867    | bleomycin hydrolase [OS=Homo sapiens]                                                                                      | 36.7          | 13           | 4          | 54     | 4                 | 539                     | 64                              | 4                                            | 4                                        | 0                | 6.69.E+07          | 6.38.E+07          | 6.79.E+07          | 7.04.E+07          | 1.54.E+08              | 1.35.E+08              | 1.56.E+08              | 1.56.E+08              |
| 1097 | O43592    | Exportin-T [OS=Homo sapiens]                                                                                               | 36.5          | 11           | 6          | 79     | 6                 | 182                     | 65                              | 6                                            | 6                                        | 0                | 7.57.E+07          | 7.72.E+07          | 7.37.E+07          | 8.26.E+07          | 1.08.E+08              | 1.05.E+08              | 6.79.E+07              | 9.42.E+07              |
| 1098 | Q32MZ4-2  | Isoform 2 of Leucine-rich repeat flightless-interacting protein 1 [OS=Homo sapiens]                                        | 36.3          | 16           | 6          | 36     | 6                 |                         | 83                              | 6                                            |                                          | 0                | 5.18.E+07          | 8.29.E+07          | 5.84.E+07          | 9.43.E+07          | 6.37.E+07              | 5.54.E+07              | 5.90.E+07              | 5.87.E+07              |
| 1099 | Q6IAA8    | regulator complex protein LAMTOR1 [OS=Homo sapiens]                                                                        | 36.2          | 45           | 4          | 76     | 4                 | 535                     | 112                             | 4                                            | 4                                        | 0                | 1.56.E+08          | 1.53.E+08          | 1.56.E+08          | 1.39.E+08          | 1.75.E+08              | 1.88.E+08              | 1.74.E+08              | 1.76.E+08              |
| 1100 | O95274    | Ly6/PLAUR domain-containing protein 3 [OS=Homo sapiens]                                                                    | 36.2          | 14           | 3          | 210    | 3                 | 5735                    | 377                             | 3                                            | 3                                        | 0                | 1.56.E+08          | 1.63.E+08          | 1.55.E+08          | 1.68.E+08          | 1.92.E+08              | 1.82.E+08              | 1.76.E+08              | 1.76.E+08              |
| 1101 | Q8N1G4    | Leucine-rich repeat-containing protein 47 [OS=Homo sapiens]                                                                | 36.0          | 17           | 5          | 155    | 5                 | 1504                    | 209                             | 5                                            | 5                                        | 0                | 6.40.E+07          | 7.31.E+07          | 9.02.E+07          | 1.08.E+08          | 7.37.E+07              | 6.54.E+07              | 8.22.E+07              | 7.64.E+07              |
| 1102 | Q13573    | SNW domain-containing protein 1 [OS=Homo sapiens]                                                                          | 35.9          | 16           | 5          | 34     | 5                 | 498                     | 41                              | 4                                            | 5                                        | 0                | 4.14.E+07          | 2.03.E+07          | 5.03.E+07          | 3.13.E+07          | 6.43.E+07              | 8.41.E+07              | 6.18.E+07              | 6.04.E+07              |
| 1103 | Q9NQX3    | Gephyrin [OS=Homo sapiens]                                                                                                 | 35.8          | 13           | 5          | 77     | 5                 | 1566                    | 118                             | 5                                            | 4                                        | 0                | 4.56.E+07          | 5.21.E+07          | 5.05.E+07          | 5.78.E+07          | 5.83.E+07              | 5.02.E+07              | 4.20.E+07              | 4.90.E+07              |
| 1104 | Q53EL6-1  | Programmed cell death protein 4 [OS=Homo sapiens]                                                                          | 35.8          | 17           | 5          | 42     | 5                 | 619                     | 62                              | 5                                            | 5                                        | 0                | 8.90.E+07          | 6.76.E+07          | 1.05.E+08          | 9.13.E+07          | 8.94.E+07              | 1.05.E+08              | 5.64.E+07              | 6.69.E+07              |
| 1105 | Q16222-1  | UDP-N-acetylhexosamine pyrophosphorylase [OS=Homo sapiens]                                                                 | 35.8          | 15           | 6          | 127    | 5                 | 1413                    | 134                             | 6                                            | 5                                        | 1                | 1.06.E+08          | 1.04.E+08          | 1.11.E+08          | 9.71.E+07          | 1.08.E+08              | 1.08.E+08              | 1.01.E+08              | 9.06.E+07              |
| 1106 | P15927-1  | Replication protein A 32 kDa subunit [OS=Homo sapiens]                                                                     | 35.7          | 26           | 4          | 138    | 4                 | 2513                    | 229                             | 4                                            | 4                                        | 0                | 1.36.E+08          | 1.40.E+08          | 1.39.E+08          | 1.32.E+08          | 1.42.E+08              | 1.52.E+08              | 1.44.E+08              | 1.53.E+08              |
| 1107 | O15020    | Spectrin beta chain, non-erythrocytic 2 [OS=Homo sapiens]                                                                  | 35.6          | 3            | 6          | 132    | 1                 | 318                     | 105                             | 5                                            | 6                                        | 0                | 2.30.E+06          | 2.28.E+06          | 2.68.E+06          | 1.84.E+06          | 3.27.E+06              | 3.41.E+06              | 3.71.E+06              | 3.61.E+06              |
| 1108 | O60264    | SWI/SNF-related matrix-associated actin-dependent regulator of chromatin subfamily A member 5 [OS=Homo sapiens]            | 35.5          | 8            | 8          | 103    | 8                 | 314                     | 66                              | 8                                            | 7                                        | 0                | 1.91.E+08          | 1.61.E+08          | 1.61.E+08          | 1.85.E+08          | 1.78.E+08              | 1.88.E+08              | 1.69.E+08              | 1.38.E+08              |
| 1109 | Q13158    | FAS-associated death domain protein [OS=Homo sapiens]                                                                      | 35.5          | 24           | 3          | 78     | 3                 | 956                     | 61                              | 3                                            | 2                                        | 0                | 4.84.E+07          | 4.39.E+07          | 4.71.E+07          | 5.41.E+07          | 6.29.E+07              | 5.40.E+07              | 4.57.E+07              | 5.45.E+07              |
| 1110 | P08574    | Cytochrome c1, heme protein, mitochondrial [OS=Homo sapiens]                                                               | 35.4          | 18           | 4          | 137    | 4                 | 2554                    | 242                             | 4                                            | 4                                        | 0                | 9.72.E+07          | 1.00.E+08          | 9.88.E+07          | 9.52.E+07          | 1.05.E+08              | 9.06.E+07              | 1.03.E+08              | 1.04.E+08              |
| 1111 | O43818    | U3 small nucleolar RNA-interacting protein 2 [OS=Homo sapiens]                                                             | 35.4          | 17           | 3          | 60     | 3                 | 886                     | 71                              | 3                                            | 3                                        | 0                | 2.79.E+07          | 3.39.E+07          | 2.72.E+07          | 3.31.E+07          | 1.96.E+07              | 1.97.E+07              | 1.63.E+07              | 1.72.E+07              |
| 1112 | Q12907    | Vesicular integral-membrane protein VIP36 [OS=Homo sapiens]                                                                | 35.3          | 26           | 6          | 73     | 6                 | 432                     | 95                              | 6                                            | 5                                        | 0                | 2.26.E+08          | 2.38.E+08          | 2.31.E+08          | 2.22.E+08          | 3.45.E+08              | 3.83.E+08              | 3.37.E+08              | 3.51.E+08              |
| 1113 | Q96TA2-1  | ATP-dependent zinc metalloprotease YME1L1 [OS=Homo sapiens]                                                                | 35.2          | 11           | 6          | 50     | 6                 | 271                     | 59                              | 6                                            | 6                                        | 0                | 9.66.E+07          | 9.38.E+07          | 9.83.E+07          | 8.95.E+07          | 1.05.E+08              | 1.06.E+08              | 1.05.E+08              | 1.06.E+08              |
| 1114 | Q15645    | Pachytene checkpoint protein 2 homolog [OS=Homo sapiens]                                                                   | 35.1          | 19           | 6          | 60     | 6                 | 523                     | 71                              | 6                                            | 6                                        | 0                | 7.03.E+07          | 7.58.E+07          | 7.82.E+07          | 7.53.E+07          | 6.98.E+07              | 9.09.E+07              | 9.43.E+07              | 8.29.E+07              |
| 1115 | Q9N66-1   | Lysophospholipid acyltransferase 7 [OS=Homo sapiens]                                                                       | 35.0          | 13           | 4          | 124    | 4                 | 1361                    | 161                             | 4                                            | 4                                        | 0                | 1.26.E+08          | 1.29.E+08          | 1.30.E+08          | 1.32.E+08          | 7.76.E+07              | 7.55.E+07              | 7.35.E+07              | 7.69.E+07              |
| 1116 | P61970    | nuclear transport factor 2 [OS=Homo sapiens]                                                                               | 35.0          | 43           | 3          | 71     | 3                 | 2225                    | 41                              | 2                                            | 3                                        | 0                | 9.00.E+07          | 9.47.E+07          | 7.69.E+07          | 8.43.E+07          | 7.90.E+07              | 7.78.E+07              | 6.66.E+07              | 7.47.E+07              |
| 1117 | O43396    | Thioredoxin-like protein 1 [OS=Homo sapiens]                                                                               | 35.0          | 23           | 5          | 148    | 5                 | 1053                    | 94                              | 4                                            | 5                                        | 0                | 1.36.E+08          | 1.91.E+08          | 1.98.E+08          | 1.77.E+08          | 2.30.E+08              | 2.28.E+08              | 2.44.E+08              | 2.26.E+08              |
| 1118 | O95372    | acyl-protein thioesterase 2 [OS=Homo sapiens]                                                                              | 34.9          | 28           | 2          | 59     | 2                 | 814                     | 76                              | 2                                            | 2                                        | 0                | 4.89.E+07          | 7.55.E+07          | 5.66.E+07          | 4.39.E+07          | 7.29.E+07              | 7.53.E+07              | 6.36.E+07              | 7.06.E+07              |
| 1119 | Q6YHK3-1  | CD109 antigen [OS=Homo sapiens]                                                                                            | 34.8          | 7            | 6          | 45     | 6                 | 628                     | 30                              | 6                                            | 6                                        | 0                | 4.67.E+07          | 5.46.E+07          | 5.31.E+07          | 5.24.E+07          | 8.12.E+07              | 8.05.E+07              | 7.80.E+07              | 7.52.E+07              |
| 1120 | P35237    | serpin B6 [OS=Homo sapiens]                                                                                                | 34.8          | 13           | 3          | 84     | 3                 | 579                     | 105                             | 3                                            | 3                                        | 0                | 5.57.E+07          | 6.60.E+07          | 6.35.E+07          | 7.13.E+07          | 9.86.E+07              | 8.94.E+07              | 9.87.E+07              | 8.05.E+07              |
| 1121 | P43357    | Melanoma-associated antigen 3 [OS=Homo sapiens]                                                                            | 34.8          | 19           | 4          | 117    | 4                 | 1158                    | 117                             | 4                                            | 4                                        | 0                | 8.69.E+07          | 8.84.E+07          | 8.51.E+07          | 8.08.E+07          | 9.51.E+07              | 7.23.E+07              | 6.43.E+07              | 8.88.E+07              |

| No.  | Accession | Description                                                                                     | Sum PEP Score | Coverage [%] | # Peptides | # PSMs | # Unique Peptides | Score Mascot: A5 Mascot | Score Sequest HT: A2 Sequest HT | # Peptides (by Search Engine): A2 Sequest HT | # Peptides (by Search Engine): A5 Mascot | # Razor Peptides | ctrl Abundance_s_1 | ctrl Abundance_s_2 | ctrl Abundance_s_3 | ctrl Abundance_s_4 | JAM-A KO Abundance_s_1 | JAM-A KO Abundance_s_2 | JAM-A KO Abundance_s_3 | JAM-A KO Abundance_s_4 |
|------|-----------|-------------------------------------------------------------------------------------------------|---------------|--------------|------------|--------|-------------------|-------------------------|---------------------------------|----------------------------------------------|------------------------------------------|------------------|--------------------|--------------------|--------------------|--------------------|------------------------|------------------------|------------------------|------------------------|
| 1122 | Q9H9J2    | 39S ribosomal protein L44, mitochondrial [OS=Homo sapiens]                                      | 34.8          | 21           | 5          | 39     | 5                 | 356                     | 44                              | 5                                            | 5                                        | 0                | 6.15.E+07          | 6.23.E+07          | 5.63.E+07          | 5.63.E+07          | 6.26.E+07              | 5.95.E+07              | 5.17.E+07              | 5.46.E+07              |
| 1123 | P08397-1  | porphobilinogen deaminase [OS=Homo sapiens]                                                     | 34.7          | 14           | 3          | 196    | 3                 | 2307                    | 223                             | 3                                            | 3                                        | 0                | 7.97.E+07          | 8.37.E+07          | 7.49.E+07          | 9.53.E+07          | 1.01.E+08              | 9.63.E+07              | 9.37.E+07              | 1.01.E+08              |
| 1124 | O15372    | Eukaryotic translation initiation factor 3 subunit H [OS=Homo sapiens]                          | 34.7          | 26           | 7          | 147    | 7                 | 621                     | 118                             | 7                                            | 6                                        | 0                | 2.53.E+08          | 2.31.E+08          | 2.51.E+08          | 2.74.E+08          | 2.23.E+08              | 2.06.E+08              | 2.06.E+08              | 2.27.E+08              |
| 1125 | Q8N684-1  | Cleavage and polyadenylation specificity factor subunit 7 [OS=Homo sapiens]                     | 34.5          | 10           | 3          | 40     | 3                 | 616                     | 49                              | 3                                            | 3                                        | 0                | 3.28.E+07          | 3.26.E+07          | 3.74.E+07          | 3.14.E+07          | 3.26.E+07              | 3.41.E+07              | 3.29.E+07              | 3.56.E+07              |
| 1126 | O60232    | Sjogren syndrome/scleroderma autoantigen 1 [OS=Homo sapiens]                                    | 34.5          | 46           | 4          | 58     | 4                 | 769                     | 85                              | 4                                            | 3                                        | 0                | 8.68.E+07          | 9.25.E+07          | 7.97.E+07          | 8.15.E+07          | 6.58.E+07              | 8.05.E+07              | 6.49.E+07              | 7.06.E+07              |
| 1127 | O75352    | Mannose-P-dolichol utilization defect 1 protein [OS=Homo sapiens]                               | 34.5          | 21           | 3          | 158    | 3                 | 1356                    | 151                             | 3                                            | 3                                        | 0                | 1.50.E+08          | 1.50.E+08          | 1.50.E+08          | 1.46.E+08          | 1.02.E+08              | 1.04.E+08              | 2.02.E+07              | 9.16.E+07              |
| 1128 | O15269    | serine palmitoyltransferase 1 [OS=Homo sapiens]                                                 | 34.5          | 19           | 5          | 22     | 5                 | 208                     | 29                              | 5                                            | 5                                        | 0                | 4.59.E+07          | 1.55.E+07          | 5.01.E+07          | 1.13.E+08          | 8.66.E+07              | 5.96.E+07              | 1.34.E+08              | 4.04.E+07              |
| 1129 | O75534    | cold shock domain-containing protein E1 [OS=Homo sapiens]                                       | 34.4          | 8            | 5          | 81     | 5                 | 1243                    | 102                             | 5                                            | 5                                        | 0                | 1.30.E+08          | 1.35.E+08          | 1.48.E+08          | 1.25.E+08          | 1.34.E+08              | 1.44.E+08              | 1.28.E+08              | 1.51.E+08              |
| 1130 | Q15637    | Splicing factor 1 [OS=Homo sapiens]                                                             | 34.4          | 10           | 4          | 139    | 4                 | 1594                    | 147                             | 4                                            | 4                                        | 0                | 1.04.E+08          | 1.18.E+08          | 9.81.E+07          | 1.05.E+08          | 6.53.E+07              | 6.94.E+07              | 3.64.E+07              | 6.48.E+07              |
| 1131 | Q92542-1  | Nicastrin [OS=Homo sapiens]                                                                     | 34.4          | 13           | 4          | 72     | 4                 | 574                     | 47                              | 4                                            | 4                                        | 0                | 2.42.E+07          | 6.23.E+07          | 2.34.E+07          | 3.24.E+07          | 9.80.E+07              | 9.39.E+07              | 7.85.E+07              | 1.01.E+08              |
| 1132 | Q9NSE4    | Isoleucine-tRNA ligase, mitochondrial [OS=Homo sapiens]                                         | 34.3          | 11           | 8          | 163    | 8                 | 148                     | 31                              | 8                                            | 8                                        | 0                | 9.54.E+07          | 1.15.E+08          | 8.76.E+07          | 1.05.E+08          | 1.32.E+08              | 1.46.E+08              | 1.61.E+08              | 1.34.E+08              |
| 1133 | Q9UBX3    | Mitochondrial dicarboxylate carrier [OS=Homo sapiens]                                           | 34.2          | 22           | 4          | 72     | 4                 | 1228                    | 92                              | 4                                            | 4                                        | 0                | 8.27.E+07          | 8.76.E+07          | 8.76.E+07          | 8.63.E+07          | 5.45.E+07              | 4.79.E+07              | 5.00.E+07              | 5.57.E+07              |
| 1134 | O60884    | DnaJ homolog subfamily A member 2 [OS=Homo sapiens]                                             | 34.1          | 15           | 4          | 84     | 4                 | 481                     | 65                              | 4                                            | 4                                        | 0                | 4.28.E+07          | 5.09.E+07          | 4.48.E+07          | 4.62.E+07          | 4.65.E+07              | 2.91.E+07              | 4.26.E+07              | 4.69.E+07              |
| 1135 | O75821    | Eukaryotic translation initiation factor 3 subunit G [OS=Homo sapiens]                          | 34.1          | 17           | 5          | 157    | 5                 | 828                     | 155                             | 5                                            | 5                                        | 0                | 2.39.E+08          | 2.09.E+08          | 2.39.E+08          | 2.53.E+08          | 2.74.E+08              | 2.58.E+08              | 3.19.E+08              | 2.59.E+08              |
| 1136 | Q9UKY7    | Protein CDV3 homolog [OS=Homo sapiens]                                                          | 34.1          | 40           | 3          | 66     | 3                 | 501                     | 95                              | 3                                            | 3                                        | 0                | 8.90.E+07          | 1.00.E+08          | 6.94.E+07          | 9.05.E+07          | 1.02.E+08              | 1.02.E+08              | 7.91.E+07              | 7.98.E+07              |
| 1137 | Q969H8    | Myeloid-derived growth factor [OS=Homo sapiens]                                                 | 34.1          | 20           | 3          | 158    | 3                 | 1584                    | 168                             | 3                                            | 3                                        | 0                | 1.46.E+08          | 1.51.E+08          | 1.51.E+08          | 1.28.E+08          | 1.45.E+08              | 1.57.E+08              | 1.70.E+08              | 1.61.E+08              |
| 1138 | P49189    | 4-trimethylaminobutylaldehyde dehydrogenase [OS=Homo sapiens]                                   | 34.1          | 15           | 4          | 114    | 4                 | 1512                    | 196                             | 4                                            | 4                                        | 0                | 9.34.E+07          | 1.11.E+08          | 1.12.E+08          | 1.12.E+08          | 1.06.E+08              | 9.73.E+07              | 9.98.E+07              | 9.89.E+07              |
| 1139 | P28331-1  | NADH-ubiquinone oxidoreductase 75 kDa subunit, mitochondrial [OS=Homo sapiens]                  | 34.0          | 15           | 6          | 44     | 6                 | 348                     | 56                              | 6                                            | 6                                        | 0                | 3.62.E+07          | 9.24.E+07          | 4.30.E+07          | 4.43.E+07          | 6.89.E+07              | 1.47.E+08              | 1.39.E+08              | 1.56.E+08              |
| 1140 | Q9BXL6-1  | Caspase recruitment domain-containing protein 14 [OS=Homo sapiens]                              | 33.9          | 7            | 4          | 52     | 4                 | 1382                    | 79                              | 4                                            | 4                                        | 0                | 2.18.E+07          | 2.96.E+07          | 4.47.E+07          | 2.56.E+07          | 3.60.E+07              | 2.95.E+07              | 2.40.E+07              | 2.69.E+07              |
| 1141 | P15586    | N-acetylglucosamine-6-sulfatase [OS=Homo sapiens]                                               | 33.9          | 14           | 5          | 103    | 5                 | 884                     | 126                             | 5                                            | 5                                        | 0                | 8.99.E+07          | 1.31.E+08          | 1.11.E+08          | 1.19.E+08          | 2.09.E+08              | 2.09.E+08              | 1.87.E+08              | 2.06.E+08              |
| 1142 | O75569-1  | Interferon-inducible double-stranded RNA-dependent protein kinase activator A [OS=Homo sapiens] | 33.7          | 28           | 5          | 92     | 5                 | 1380                    | 136                             | 5                                            | 4                                        | 0                | 6.99.E+07          | 7.27.E+07          | 6.79.E+07          | 6.71.E+07          | 9.56.E+07              | 8.31.E+07              | 6.79.E+07              | 9.00.E+07              |
| 1143 | Q9Y5S9    | RNA-binding protein 8A [OS=Homo sapiens]                                                        | 33.7          | 22           | 4          | 99     | 4                 | 1457                    | 141                             | 4                                            | 4                                        | 0                | 1.90.E+08          | 1.91.E+08          | 1.89.E+08          | 1.92.E+08          | 1.93.E+08              | 2.03.E+08              | 2.14.E+08              | 1.98.E+08              |
| 1144 | Q8IY67-2  | Isoform 2 of Ribonucleoprotein PTB-binding 1 [OS=Homo sapiens]                                  | 33.6          | 19           | 6          | 41     | 6                 |                         | 74                              | 6                                            |                                          | 0                | 3.94.E+07          | 3.04.E+07          | 4.48.E+07          | 4.86.E+07          | 4.60.E+07              | 4.53.E+07              | 5.20.E+07              | 4.86.E+07              |
| 1145 | P23368-1  | NAD-dependent malic enzyme, mitochondrial [OS=Homo sapiens]                                     | 33.6          | 21           | 5          | 88     | 5                 | 588                     | 62                              | 5                                            | 5                                        | 0                | 9.48.E+07          | 9.83.E+07          | 7.94.E+07          | 8.74.E+07          | 7.50.E+07              | 7.41.E+07              | 6.83.E+07              | 6.37.E+07              |
| 1146 | Q9NVJ2    | ADP-ribosylation factor-like protein 8B [OS=Homo sapiens]                                       | 33.6          | 33           | 5          | 141    | 5                 | 777                     | 126                             | 5                                            | 5                                        | 0                | 1.33.E+08          | 1.33.E+08          | 1.33.E+08          | 1.52.E+08          | 9.61.E+07              | 8.36.E+07              | 1.04.E+08              | 1.03.E+08              |
| 1147 | Q9UBS4    | DnaJ homolog subfamily B member 11 [OS=Homo sapiens]                                            | 33.6          | 15           | 4          | 90     | 4                 | 1543                    | 104                             | 4                                            | 4                                        | 0                | 1.10.E+08          | 1.18.E+08          | 1.23.E+08          | 1.40.E+08          | 1.52.E+08              | 1.46.E+08              | 1.54.E+08              | 1.57.E+08              |
| 1148 | Q14134-1  | Tripartite motif-containing protein 29 [OS=Homo sapiens]                                        | 33.5          | 15           | 6          | 71     | 6                 | 459                     | 62                              | 6                                            | 6                                        | 0                | 1.43.E+08          | 1.39.E+08          | 1.35.E+08          | 1.51.E+08          | 8.32.E+07              | 9.00.E+07              | 8.02.E+07              | 7.65.E+07              |
| 1149 | Q8N766-1  | ER membrane protein complex subunit 1 [OS=Homo sapiens]                                         | 33.4          | 7            | 4          | 112    | 4                 | 1442                    | 121                             | 4                                            | 4                                        | 0                | 3.91.E+07          | 4.22.E+07          | 3.07.E+07          | 4.26.E+07          | 4.41.E+07              | 4.07.E+07              | 3.70.E+07              | 4.20.E+07              |
| 1150 | Q08209-1  | Serine/threonine-protein phosphatase 2B catalytic subunit alpha isoform [OS=Homo sapiens]       | 33.3          | 21           | 7          | 51     | 7                 | 326                     | 38                              | 7                                            | 7                                        | 0                | 2.31.E+08          | 2.72.E+08          | 2.38.E+08          | 2.43.E+08          | 2.06.E+08              | 1.94.E+08              | 2.16.E+08              | 2.00.E+08              |
| 1151 | Q96BS2-1  | calineurin B homologous protein 3 [OS=Homo sapiens]                                             | 33.3          | 25           | 4          | 120    | 4                 | 827                     | 148                             | 4                                            | 4                                        | 0                | 1.75.E+08          | 1.67.E+08          | 1.83.E+08          | 1.98.E+08          | 2.58.E+08              | 2.00.E+08              | 2.44.E+08              | 2.60.E+08              |
| 1152 | Q96EK5    | KIF1-binding protein [OS=Homo sapiens]                                                          | 33.3          | 17           | 6          | 19     | 6                 | 91                      | 12                              | 6                                            | 5                                        | 0                | 1.72.E+07          | 6.00.E+07          | 1.61.E+07          | 5.40.E+07          | 6.03.E+07              | 2.29.E+07              | 2.47.E+07              | 5.47.E+07              |
| 1153 | O60784    | Target of Myb protein 1 [OS=Homo sapiens]                                                       | 33.3          | 15           | 4          | 100    | 4                 | 1951                    | 161                             | 4                                            | 4                                        | 0                | 4.71.E+07          | 5.50.E+07          | 5.14.E+07          | 5.06.E+07          | 6.53.E+07              | 6.65.E+07              | 7.08.E+07              | 6.46.E+07              |
| 1154 | Q9UHG3    | prenylcysteine oxidase 1 [OS=Homo sapiens]                                                      | 33.3          | 15           | 5          | 79     | 5                 | 681                     | 56                              | 5                                            | 5                                        | 0                | 1.37.E+08          | 1.34.E+08          | 1.31.E+08          | 1.39.E+08          | 1.45.E+08              | 1.59.E+08              | 1.36.E+08              | 1.50.E+08              |
| 1155 | Q9Y2Z0-1  | Protein SGT1 homolog [OS=Homo sapiens]                                                          | 33.2          | 18           | 4          | 60     | 4                 | 691                     | 76                              | 4                                            | 4                                        | 0                | 6.75.E+07          | 6.81.E+07          | 6.70.E+07          | 6.79.E+07          | 5.75.E+07              | 7.87.E+07              | 7.17.E+07              | 7.98.E+07              |
| 1156 | Q92804-1  | TATA-binding protein-associated factor 2N [OS=Homo sapiens]                                     | 33.2          | 8            | 4          | 164    | 2                 | 1214                    | 186                             | 4                                            | 4                                        | 0                | 9.16.E+07          | 9.53.E+07          | 9.23.E+07          | 7.68.E+07          | 1.15.E+08              | 1.28.E+08              | 1.17.E+08              | 1.23.E+08              |
| 1157 | P62847-1  | 40S ribosomal protein S24 [OS=Homo sapiens]                                                     | 33.2          | 29           | 4          | 278    | 4                 | 4070                    | 394                             | 4                                            | 4                                        | 0                | 6.21.E+08          | 6.62.E+08          | 5.61.E+08          | 6.66.E+08          | 5.42.E+08              | 5.31.E+08              | 4.19.E+08              | 5.01.E+08              |
| 1158 | O15247    | Chloride intracellular channel protein 2 [OS=Homo sapiens]                                      | 33.2          | 32           | 6          | 79     | 5                 | 957                     | 22                              | 5                                            | 5                                        | 0                | 4.90.E+07          | 3.34.E+07          | 2.93.E+07          | 2.88.E+07          |                        |                        |                        |                        |
| 1159 | O75306-1  | NADH dehydrogenase [ubiquinone] iron-sulfur protein 2, mitochondrial [OS=Homo sapiens]          | 33.2          | 14           | 4          | 24     | 4                 | 102                     | 30                              | 4                                            | 4                                        | 0                | 5.07.E+07          | 5.91.E+07          | 4.51.E+07          | 4.18.E+07          | 5.68.E+07              | 6.51.E+07              | 6.43.E+07              | 6.49.E+07              |
| 1160 | O43278    | Kunitz-type protease inhibitor 1 [OS=Homo sapiens]                                              | 33.1          | 9            | 4          | 56     | 4                 | 251                     | 57                              | 4                                            | 4                                        | 0                | 7.46.E+07          | 6.80.E+07          | 7.25.E+07          | 6.58.E+07          | 7.23.E+07              | 7.24.E+07              | 7.37.E+07              | 6.77.E+07              |
| 1161 | Q8TD19    | Serine/threonine-protein kinase Nek9 [OS=Homo sapiens]                                          | 33.1          | 7            | 4          | 15     | 4                 | 222                     | 21                              | 4                                            | 3                                        | 0                | 3.99.E+07          | 2.45.E+07          | 3.74.E+07          | 3.34.E+07          | 6.39.E+07              | 6.34.E+07              | 3.35.E+07              | 8.75.E+07              |
| 1162 | P49354    | protein farnesyltransferase/geranylgeranyltransferase type-1 subunit alpha [OS=Homo sapiens]    | 33.1          | 13           | 3          | 65     | 3                 | 864                     | 40                              | 3                                            | 3                                        | 0                | 2.96.E+07          | 3.37.E+07          | 3.24.E+07          | 3.00.E+07          | 3.49.E+07              | 3.23.E+07              | 3.04.E+07              | 3.36.E+07              |
| 1163 | P07919    | Cytochrome b-c1 complex subunit 6, mitochondrial [OS=Homo sapiens]                              | 33.0          | 30           | 2          | 130    | 2                 | 2009                    | 239                             | 2                                            | 2                                        | 0                | 1.41.E+08          | 1.45.E+08          | 1.54.E+08          | 1.55.E+08          | 1.30.E+08              | 1.42.E+08              | 1.07.E+08              | 1.26.E+08              |
| 1164 | O00170    | AH receptor-interacting protein [OS=Homo sapiens]                                               | 32.9          | 22           | 5          | 77     | 5                 | 987                     | 80                              | 5                                            | 5                                        | 0                | 8.68.E+07          | 8.44.E+07          | 8.74.E+07          | 9.25.E+07          | 1.34.E+08              | 1.28.E+08              | 1.30.E+08              | 1.44.E+08              |
| 1165 | Q06203    | amidophosphoribosyltransferase [OS=Homo sapiens]                                                | 32.9          | 14           | 5          | 63     | 5                 | 888                     | 78                              | 5                                            | 5                                        | 0                | 1.57.E+08          | 1.69.E+08          | 1.65.E+08          | 1.61.E+08          | 2.03.E+08              | 2.03.E+08              | 2.05.E+08              | 2.05.E+08              |
| 1166 | O43708    | methylacetate isomerase [OS=Homo sapiens]                                                       | 32.7          | 24           | 3          | 80     | 3                 | 966                     | 129                             | 3                                            | 3                                        | 0                | 7.21.E+07          | 8.51.E+07          | 7.62.E+07          | 7.08.E+07          | 8.14.E+07              | 8.77.E+07              | 8.16.E+07              | 8.08.E+07              |
| 1167 | Q13572-1  | Inositol-tetrakisphosphate 1-kinase [OS=Homo sapiens]                                           | 32.7          | 18           | 4          | 58     | 4                 | 418                     | 92                              | 4                                            | 4                                        | 0                | 1.83.E+08          | 1.88.E+08          | 1.40.E+08          | 1.83.E+08          | 1.37.E+08              | 1.16.E+08              | 8.22.E+07              | 8.41.E+07              |
| 1168 | P35659-1  | Protein DEK [OS=Homo sapiens]                                                                   | 32.7          | 22           | 7          | 120    | 7                 | 495                     | 68                              | 7                                            | 7                                        | 0                | 1.04.E+08          | 1.04.E+08          | 1.01.E+08          | 9.74.E+07          | 1.00.E+08              | 9.89.E+07              | 1.04.E+08              | 1.02.E+08              |
| 1169 | O94826    | Mitochondrial import receptor subunit TOM70 [OS=Homo sapiens]                                   | 32.6          | 12           | 6          | 177    | 6                 | 1246                    | 148                             | 6                                            | 5                                        | 0                | 1.59.E+08          | 1.61.E+08          | 1.64.E+08          | 1.60.E+08          | 1.62.E+08              | 9.12.E+07              | 1.41.E+08              | 1.55.E+08              |
| 1170 | Q6GMV3    | Putative peptidyl-tRNA hydrolase PTRHD1 [OS=Homo sapiens]                                       | 32.5          | 50           | 4          | 34     | 4                 | 246                     | 61                              | 4                                            | 4                                        | 0                | 7.12.E+07          | 7.57.E+07          | 7.09.E+07          | 7.00.E+07          | 8.85.E+07              | 8.31.E+07              | 8.07.E+07              | 8.61.E+07              |
| 1171 | P42285    | Superkiller viralicidic activity 2-like 2 [OS=Homo sapiens]                                     | 32.4          | 6            | 4          | 40     | 4                 | 581                     | 26                              | 4                                            | 4                                        | 0                | 2.45.E+07          | 2.25.E+07          | 1.73.E+07          | 1.88.E+07          | 1.27.E+07              | 9.21.E+06              | 1.01.E+07              | 8.27.E+06              |
| 1172 | P61081    | NEDD8-conjugating enzyme Ubc12 [OS=Homo sapiens]                                                | 32.4          | 34           | 7          | 168    | 7                 | 1330                    | 140                             | 7                                            | 6                                        | 0                | 3.85.E+08          | 3.92.E+08          | 4.09.E+08          | 3.77.E+08          | 2.16.E+08              | 2.31.E+08              | 2.23.E+08              | 2.34.E+08              |

| No.  | Accession | Description                                                                                      | Sum PEP Score | Coverage [%] | # Peptides | # PSMs | # Unique Peptides | Score Mascot: A5 Mascot | Score Sequest HT: A2 Sequest HT | # Peptides (by Search Engine): A2 Sequest HT | # Peptides (by Search Engine): A5 Mascot | # Razor Peptides | ctrl Abundance s_1 | ctrl Abundance s_2 | ctrl Abundance s_3 | ctrl Abundance s_4 | JAM-A KO Abundance s_1 | JAM-A KO Abundance s_2 | JAM-A KO Abundance s_3 | JAM-A KO Abundance s_4 |
|------|-----------|--------------------------------------------------------------------------------------------------|---------------|--------------|------------|--------|-------------------|-------------------------|---------------------------------|----------------------------------------------|------------------------------------------|------------------|--------------------|--------------------|--------------------|--------------------|------------------------|------------------------|------------------------|------------------------|
| 1173 | Q9H2W6    | 39S ribosomal protein L46, mitochondrial [OS=Homo sapiens]                                       | 32.3          | 24           | 3          | 87     | 3                 | 1582                    | 152                             | 3                                            | 3                                        | 0                | 7.47.E+07          | 6.23.E+07          | 7.05.E+07          | 8.21.E+07          | 6.11.E+07              | 6.22.E+07              | 6.51.E+07              | 6.82.E+07              |
| 1174 | Q8N5N7    | 39S ribosomal protein L50, mitochondrial [OS=Homo sapiens]                                       | 32.3          | 32           | 3          | 57     | 3                 | 253                     | 18                              | 3                                            | 3                                        | 0                | 4.70.E+07          | 5.22.E+07          | 4.73.E+07          | 3.94.E+07          | 4.98.E+07              | 5.48.E+07              | 4.37.E+07              | 4.79.E+07              |
| 1175 | P23229-1  | integrin alpha-6 [OS=Homo sapiens]                                                               | 32.3          | 5            | 4          | 25     | 4                 | 462                     | 34                              | 3                                            | 4                                        | 0                | 3.03.E+07          | 3.17.E+07          | 3.20.E+07          | 3.08.E+07          | 3.56.E+07              | 3.63.E+07              | 2.32.E+07              | 2.95.E+07              |
| 1176 | P15170-3  | Isoform 3 of Eukaryotic peptide chain release factor GTP-binding subunit ERF3A [OS=Homo sapiens] | 32.1          | 14           | 6          | 68     | 6                 |                         | 154                             | 6                                            |                                          | 0                | 1.44.E+08          | 1.42.E+08          | 1.51.E+08          | 1.62.E+08          | 1.45.E+08              | 1.33.E+08              | 1.54.E+08              | 1.44.E+08              |
| 1177 | Q9Y3D6    | mitochondrial fission 1 protein [OS=Homo sapiens]                                                | 32.1          | 34           | 4          | 163    | 4                 | 1367                    | 133                             | 4                                            | 4                                        | 0                | 7.75.E+07          | 8.74.E+07          | 7.17.E+07          | 9.00.E+07          | 8.17.E+07              | 8.22.E+07              | 6.92.E+07              | 7.85.E+07              |
| 1178 | Q9Y316-1  | Protein MEMO1 [OS=Homo sapiens]                                                                  | 32.0          | 29           | 5          | 52     | 5                 | 474                     | 48                              | 5                                            | 5                                        | 0                | 2.78.E+07          | 2.90.E+07          | 3.02.E+07          | 3.06.E+07          | 4.46.E+07              | 4.35.E+07              | 3.96.E+07              | 4.38.E+07              |
| 1179 | P11717    | Cation-independent mannose-6-phosphate receptor [OS=Homo sapiens]                                | 32.0          | 5            | 8          | 88     | 8                 | 362                     | 65                              | 8                                            | 8                                        | 0                | 2.72.E+07          | 2.89.E+07          | 2.92.E+07          | 3.29.E+07          | 9.70.E+07              | 1.05.E+08              | 8.10.E+07              | 8.66.E+07              |
| 1180 | P61006    | Ras-related protein Rab-8A [OS=Homo sapiens]                                                     | 31.9          | 18           | 4          | 369    | 1                 | 5491                    | 482                             | 4                                            | 4                                        | 0                | 2.42.E+07          | 1.84.E+07          | 1.40.E+07          | 2.14.E+07          | 1.87.E+07              | 2.20.E+07              | 2.29.E+07              | 2.77.E+07              |
| 1181 | Q12765    | Secernin-1 [OS=Homo sapiens]                                                                     | 31.9          | 18           | 5          | 62     | 5                 | 272                     | 58                              | 5                                            | 5                                        | 0                | 8.67.E+07          | 1.25.E+08          | 3.95.E+07          | 4.21.E+07          | 1.26.E+08              | 1.86.E+08              | 1.12.E+08              | 1.39.E+08              |
| 1182 | P78330    | phosphoserine phosphatase [OS=Homo sapiens]                                                      | 31.9          | 43           | 7          | 70     | 7                 | 488                     | 63                              | 6                                            | 7                                        | 0                | 1.44.E+08          | 1.24.E+08          | 1.52.E+08          | 1.57.E+08          | 2.34.E+08              | 2.20.E+08              | 2.43.E+08              | 2.37.E+08              |
| 1183 | O00505    | Importin subunit alpha-4 [OS=Homo sapiens]                                                       | 31.9          | 20           | 6          | 47     | 3                 | 541                     | 57                              | 6                                            | 5                                        | 0                | 1.52.E+07          | 1.72.E+07          | 2.01.E+07          | 1.92.E+07          | 2.60.E+07              | 8.15.E+06              | 2.44.E+07              | 2.61.E+07              |
| 1184 | A0AVT1-1  | Ubiquitin-like modifier-activating enzyme 6 [OS=Homo sapiens]                                    | 31.9          | 8            | 6          | 74     | 6                 | 593                     | 69                              | 6                                            | 6                                        | 0                | 2.02.E+08          | 1.80.E+08          | 2.16.E+08          | 1.77.E+08          | 1.20.E+08              | 1.14.E+08              | 1.30.E+08              | 1.16.E+08              |
| 1185 | Q9BWM7    | Sideroflexin-3 [OS=Homo sapiens]                                                                 | 31.8          | 13           | 3          | 87     | 1                 | 941                     | 82                              | 3                                            | 3                                        | 0                | 5.71.E+07          | 4.99.E+07          | 3.76.E+07          | 3.21.E+07          | 6.18.E+07              | 4.40.E+07              | 2.88.E+07              | 2.58.E+07              |
| 1186 | Q9NWX4    | 14 kDa phosphohistidine phosphatase [OS=Homo sapiens]                                            | 31.8          | 45           | 3          | 56     | 3                 | 1466                    | 0                               | 2                                            | 2                                        | 0                | 1.72.E+08          | 1.78.E+08          | 1.78.E+08          | 1.79.E+08          | 2.13.E+08              | 1.93.E+08              | 2.02.E+08              | 2.00.E+08              |
| 1187 | Q15121    | Astrocytic phosphoprotein PEA-15 [OS=Homo sapiens]                                               | 31.6          | 40           | 3          | 63     | 3                 | 1338                    | 55                              | 2                                            | 3                                        | 0                | 4.31.E+07          | 3.16.E+07          | 3.36.E+07          | 3.56.E+07          | 3.50.E+07              | 3.73.E+07              | 3.58.E+07              | 3.89.E+07              |
| 1188 | P23921    | Ribonucleoside-diphosphate reductase large subunit [OS=Homo sapiens]                             | 31.6          | 11           | 4          | 44     | 4                 | 810                     | 60                              | 4                                            | 3                                        | 0                | 2.45.E+07          | 2.16.E+07          | 1.68.E+07          | 2.91.E+07          | 2.19.E+07              | 2.27.E+07              | 2.19.E+07              | 1.90.E+07              |
| 1189 | Q07157    | Tight junction protein ZO-1 [OS=Homo sapiens]                                                    | 31.6          | 4            | 5          | 66     | 5                 | 454                     | 47                              | 5                                            | 5                                        | 0                | 3.10.E+07          | 3.97.E+07          | 3.35.E+07          | 3.41.E+07          | 6.10.E+07              | 6.49.E+07              | 6.16.E+07              | 5.65.E+07              |
| 1190 | Q9Y6B6    | GTP-binding protein SAR1b [OS=Homo sapiens]                                                      | 31.6          | 47           | 6          | 112    | 3                 | 685                     | 89                              | 6                                            | 6                                        | 0                | 3.37.E+07          | 3.72.E+07          | 3.33.E+07          | 2.45.E+07          | 4.68.E+07              | 4.13.E+07              | 2.98.E+07              | 4.23.E+07              |
| 1191 | P10253    | lysosomal alpha-glucosidase [OS=Homo sapiens]                                                    | 31.5          | 11           | 5          | 54     | 5                 | 398                     | 54                              | 5                                            | 5                                        | 0                | 6.94.E+07          | 6.75.E+07          | 6.35.E+07          | 6.80.E+07          | 1.07.E+08              | 1.20.E+08              | 7.43.E+07              | 1.25.E+08              |
| 1192 | O95197-3  | Isoform 3 of Reticulon-3 [OS=Homo sapiens]                                                       | 31.5          | 11           | 2          | 76     | 1                 |                         | 217                             | 2                                            |                                          | 0                | 1.81.E+08          | 1.87.E+08          | 1.79.E+08          | 1.62.E+08          | 1.97.E+08              | 2.03.E+08              | 2.08.E+08              | 1.94.E+08              |
| 1193 | Q15397    | Pumilio homolog 3 [OS=Homo sapiens]                                                              | 31.5          | 15           | 5          | 84     | 5                 | 1306                    | 123                             | 5                                            | 5                                        | 0                | 3.96.E+07          | 5.16.E+07          | 3.85.E+07          | 4.37.E+07          | 4.55.E+07              | 3.79.E+07              | 3.42.E+07              | 3.67.E+07              |
| 1194 | Q5VYK3    | Proteasome-associated protein ECM29 homolog [OS=Homo sapiens]                                    | 31.5          | 3            | 5          | 110    | 5                 | 1115                    | 63                              | 5                                            | 5                                        | 0                | 3.48.E+07          | 4.75.E+07          | 4.05.E+07          | 4.28.E+07          | 5.07.E+07              | 4.57.E+07              | 4.63.E+07              | 4.75.E+07              |
| 1195 | P63208    | s-phase kinase-associated protein 1 [OS=Homo sapiens]                                            | 31.5          | 47           | 6          | 143    | 6                 | 1757                    | 128                             | 6                                            | 6                                        | 0                | 2.20.E+08          | 8.77.E+07          | 1.52.E+08          | 1.67.E+08          | 1.26.E+08              | 1.26.E+08              | 2.95.E+08              | 1.20.E+08              |
| 1196 | Q9Y5K6    | CD2-associated protein [OS=Homo sapiens]                                                         | 31.4          | 18           | 8          | 67     | 8                 | 184                     | 58                              | 8                                            | 7                                        | 0                | 8.06.E+07          | 7.72.E+07          | 8.10.E+07          | 1.04.E+08          | 8.74.E+07              | 1.14.E+08              | 9.76.E+07              | 1.33.E+08              |
| 1197 | O15145    | Actin-related protein 2/3 complex subunit 3 [OS=Homo sapiens]                                    | 31.3          | 33           | 7          | 121    | 7                 | 578                     | 93                              | 6                                            | 6                                        | 0                | 7.98.E+07          | 9.04.E+07          | 7.81.E+07          | 8.52.E+07          | 1.07.E+08              | 1.11.E+08              | 1.13.E+08              | 1.01.E+08              |
| 1198 | Q93009    | Ubiquitin carboxyl-terminal hydrolase 7 [OS=Homo sapiens]                                        | 31.3          | 6            | 5          | 76     | 5                 | 687                     | 78                              | 5                                            | 5                                        | 0                | 4.73.E+07          | 5.15.E+07          | 4.16.E+07          | 5.37.E+07          | 3.93.E+07              | 3.27.E+07              | 3.55.E+07              | 3.31.E+07              |
| 1199 | Q13442    | 28 kDa heat- and acid-stable phosphoprotein [OS=Homo sapiens]                                    | 31.2          | 23           | 3          | 110    | 3                 | 2829                    | 194                             | 3                                            | 3                                        | 0                | 1.34.E+08          | 1.40.E+08          | 1.35.E+08          | 1.41.E+08          | 1.57.E+08              | 1.55.E+08              | 1.64.E+08              | 1.36.E+08              |
| 1200 | P53597    | Succinate--CoA ligase [ADP/GDP-forming] subunit alpha, mitochondrial [OS=Homo sapiens]           | 31.2          | 22           | 6          | 162    | 6                 | 943                     | 147                             | 6                                            | 6                                        | 0                | 2.40.E+08          | 2.45.E+08          | 2.40.E+08          | 2.52.E+08          | 3.03.E+08              | 2.47.E+08              | 2.53.E+08              | 2.60.E+08              |
| 1201 | Q96K17-1  | transcription factor BTF3 homolog 4 [OS=Homo sapiens]                                            | 31.2          | 50           | 3          | 132    | 3                 | 1834                    | 213                             | 3                                            | 3                                        | 0                | 1.19.E+08          | 1.27.E+08          | 1.22.E+08          | 1.36.E+08          | 1.49.E+08              | 1.33.E+08              | 1.36.E+08              | 1.39.E+08              |
| 1202 | Q96EL3    | 39S ribosomal protein L53, mitochondrial [OS=Homo sapiens]                                       | 31.2          | 28           | 2          | 88     | 2                 | 1813                    | 140                             | 2                                            | 2                                        | 0                | 3.86.E+07          | 4.31.E+07          | 3.17.E+07          | 4.28.E+07          | 3.41.E+07              | 3.74.E+07              | 3.13.E+07              | 3.65.E+07              |
| 1203 | P54105    | Methylosome subunit pICln [OS=Homo sapiens]                                                      | 31.1          | 22           | 2          | 78     | 2                 | 2077                    | 136                             | 2                                            | 2                                        | 0                | 6.52.E+07          | 7.54.E+07          | 6.23.E+07          | 6.93.E+07          | 6.07.E+07              | 6.45.E+07              | 5.19.E+07              | 6.15.E+07              |
| 1204 | Q9NS69    | Mitochondrial import receptor subunit TOM22 homolog [OS=Homo sapiens]                            | 31.1          | 49           | 4          | 68     | 4                 | 1416                    | 81                              | 3                                            | 4                                        | 0                | 1.23.E+08          | 1.19.E+08          | 1.06.E+08          | 1.46.E+08          | 9.70.E+07              | 7.53.E+07              | 8.42.E+07              | 9.99.E+07              |
| 1205 | P61619    | Protein transport protein Sec61 subunit alpha isoform 1 [OS=Homo sapiens]                        | 31.1          | 9            | 2          | 98     | 2                 | 652                     | 88                              | 2                                            | 2                                        | 0                | 7.81.E+07          | 8.04.E+07          | 6.34.E+07          | 8.94.E+07          | 9.22.E+07              | 9.42.E+07              | 8.06.E+07              | 8.40.E+07              |
| 1206 | P27694    | Replication protein A 70 kDa DNA-binding subunit [OS=Homo sapiens]                               | 31.0          | 14           | 5          | 78     | 5                 | 1067                    | 92                              | 5                                            | 5                                        | 0                | 1.16.E+08          | 1.19.E+08          | 1.11.E+08          | 1.22.E+08          | 1.13.E+08              | 1.25.E+08              | 9.77.E+07              | 1.18.E+08              |
| 1207 | Q9NTJ3-1  | Structural maintenance of chromosomes protein 4 [OS=Homo sapiens]                                | 31.0          | 6            | 4          | 66     | 4                 | 704                     | 100                             | 4                                            | 4                                        | 0                | 6.80.E+07          | 7.09.E+07          | 7.03.E+07          | 7.39.E+07          | 8.01.E+07              | 7.94.E+07              | 7.99.E+07              | 8.01.E+07              |
| 1208 | Q5JTV8    | Torsin-1A-interacting protein 1 [OS=Homo sapiens]                                                | 31.0          | 9            | 4          | 66     | 4                 | 520                     | 92                              | 4                                            | 4                                        | 0                | 6.59.E+07          | 6.92.E+07          | 6.20.E+07          | 5.75.E+07          | 9.50.E+07              | 9.25.E+07              | 7.88.E+07              | 9.52.E+07              |
| 1209 | O95816    | BAG family molecular chaperone regulator 2 [OS=Homo sapiens]                                     | 31.0          | 47           | 6          | 114    | 6                 | 1083                    | 121                             | 6                                            | 5                                        | 0                | 1.14.E+08          | 1.30.E+08          | 1.25.E+08          | 1.25.E+08          | 1.63.E+08              | 1.63.E+08              | 1.54.E+08              | 1.69.E+08              |
| 1210 | Q9BXP5    | serrate RNA effector molecule homolog [OS=Homo sapiens]                                          | 30.9          | 13           | 7          | 91     | 7                 | 255                     | 71                              | 7                                            | 6                                        | 0                | 8.58.E+07          | 9.03.E+07          | 8.34.E+07          | 9.24.E+07          | 1.04.E+08              | 9.68.E+07              | 9.78.E+07              | 1.03.E+08              |
| 1211 | Q99426    | tubulin-folding cofactor B [OS=Homo sapiens]                                                     | 30.9          | 30           | 5          | 118    | 5                 | 859                     | 79                              | 5                                            | 5                                        | 0                | 1.10.E+08          | 1.00.E+08          | 9.18.E+07          | 1.05.E+08          | 9.12.E+07              | 9.24.E+07              | 7.93.E+07              | 9.06.E+07              |
| 1212 | P62633-4  | Isoform 4 of Cellular nucleic acid-binding protein [OS=Homo sapiens]                             | 30.8          | 24           | 3          | 61     | 1                 |                         | 67                              | 3                                            |                                          | 0                |                    |                    |                    |                    |                        |                        |                        |                        |
| 1213 | Q96S19    | spermatid perinuclear RNA-binding protein [OS=Homo sapiens]                                      | 30.8          | 9            | 4          | 43     | 1                 | 145                     | 38                              | 4                                            | 4                                        | 0                | 1.02.E+07          | 1.12.E+07          | 7.57.E+06          | 4.25.E+06          |                        | 8.78.E+06              |                        | 7.75.E+05              |
| 1214 | Q9P000-1  | COMM domain-containing protein 9 [OS=Homo sapiens]                                               | 30.7          | 31           | 3          | 46     | 3                 | 1354                    | 28                              | 2                                            | 3                                        | 0                | 4.80.E+07          | 4.74.E+07          | 3.75.E+07          | 4.43.E+07          | 4.11.E+07              | 3.90.E+07              | 3.26.E+07              | 2.98.E+07              |
| 1215 | Q15369-1  | elongin-C [OS=Homo sapiens]                                                                      | 30.7          | 49           | 4          | 55     | 4                 | 430                     | 31                              | 4                                            | 4                                        | 0                | 1.39.E+08          | 1.61.E+08          | 1.23.E+08          | 7.41.E+07          | 1.74.E+08              | 1.63.E+08              | 1.41.E+08              | 1.38.E+08              |
| 1216 | Q9Y277    | Voltage-dependent anion-selective channel protein 3 [OS=Homo sapiens]                            | 30.7          | 30           | 6          | 199    | 5                 | 3163                    | 221                             | 5                                            | 6                                        | 0                | 1.33.E+08          | 1.50.E+08          | 1.73.E+08          | 1.58.E+08          | 9.37.E+07              | 1.04.E+08              | 1.03.E+08              | 9.61.E+07              |
| 1217 | P46109    | Crk-like protein [OS=Homo sapiens]                                                               | 30.7          | 15           | 3          | 49     | 3                 | 178                     | 55                              | 3                                            | 3                                        | 0                | 2.66.E+08          | 2.73.E+08          | 2.77.E+08          | 2.44.E+08          | 3.42.E+08              | 3.49.E+08              | 3.67.E+08              | 3.41.E+08              |
| 1218 | Q9HB07    | UPF0160 protein MYG1, mitochondrial [OS=Homo sapiens]                                            | 30.6          | 20           | 6          | 112    | 6                 | 1030                    | 141                             | 6                                            | 6                                        | 0                | 2.36.E+08          | 2.29.E+08          | 2.34.E+08          | 2.13.E+08          | 2.23.E+08              | 2.39.E+08              | 2.39.E+08              | 2.40.E+08              |
| 1219 | O75489    | NADH dehydrogenase [ubiquinone] iron-sulfur protein 3, mitochondrial [OS=Homo sapiens]           | 30.6          | 27           | 5          | 80     | 5                 | 961                     | 119                             | 5                                            | 5                                        | 0                | 1.09.E+08          | 1.20.E+08          | 1.05.E+08          | 1.12.E+08          | 1.31.E+08              | 1.49.E+08              | 1.26.E+08              | 1.41.E+08              |
| 1220 | P13987    | CD59 glycoprotein [OS=Homo sapiens]                                                              | 30.6          | 20           | 3          | 224    | 3                 | 1426                    | 332                             | 3                                            | 3                                        | 0                | 7.18.E+08          | 6.39.E+08          | 7.04.E+08          | 7.73.E+08          | 4.74.E+08              | 4.35.E+08              | 5.18.E+08              | 4.64.E+08              |
| 1221 | Q8TCT9-1  | Minor histocompatibility antigen H13 [OS=Homo sapiens]                                           | 30.6          | 22           | 4          | 184    | 4                 | 1553                    | 237                             | 4                                            | 4                                        | 0                | 1.90.E+08          | 1.36.E+08          | 1.82.E+08          | 1.46.E+08          | 2.19.E+08              | 1.43.E+08              | 2.01.E+08              | 2.02.E+08              |
| 1222 | P43246-1  | DNA mismatch repair protein MSH2 [OS=Homo sapiens]                                               | 30.6          | 7            | 6          | 82     | 6                 | 1117                    | 63                              | 6                                            | 6                                        | 0                | 3.82.E+08          | 4.19.E+08          | 3.45.E+08          | 4.39.E+08          | 5.01.E+08              | 4.44.E+08              | 4.38.E+08              | 4.78.E+08              |

| No.  | Accession | Description                                                                                       | Sum PEP Score | Coverage [%] | # Peptides | # PSMs | # Unique Peptides | Score Mascot: A5 Mascot | Score Request HT: A2 Sequest HT | # Peptides (by Search Engine): A2 Sequest HT | # Peptides (by Search Engine): A5 Mascot | # Razor Peptides | ctrl Abundance_s_1 | ctrl Abundance_s_2 | ctrl Abundance_s_3 | ctrl Abundance_s_4 | JAM-A KO Abundance_s_1 | JAM-A KO Abundance_s_2 | JAM-A KO Abundance_s_3 | JAM-A KO Abundance_s_4 |
|------|-----------|---------------------------------------------------------------------------------------------------|---------------|--------------|------------|--------|-------------------|-------------------------|---------------------------------|----------------------------------------------|------------------------------------------|------------------|--------------------|--------------------|--------------------|--------------------|------------------------|------------------------|------------------------|------------------------|
| 1223 | P43307    | Translocon-associated protein subunit alpha [OS=Homo sapiens]                                     | 30.5          | 22           | 4          | 149    | 4                 | 2260                    | 156                             | 4                                            | 4                                        | 0                | 1.18.E+08          | 1.12.E+08          | 1.06.E+08          | 1.12.E+08          | 1.49.E+08              | 1.67.E+08              | 1.58.E+08              | 1.59.E+08              |
| 1224 | P29373    | Cellular retinoic acid-binding protein 2 [OS=Homo sapiens]                                        | 30.4          | 18           | 2          | 40     | 2                 | 591                     | 64                              | 2                                            | 2                                        | 0                | 9.39.E+07          | 8.83.E+07          | 8.54.E+07          | 8.64.E+07          | 2.24.E+07              | 2.37.E+07              | 2.23.E+07              | 2.30.E+07              |
| 1225 | Q9NUU7    | ATP-dependent RNA helicase DDX19A [OS=Homo sapiens]                                               | 30.4          | 13           | 4          | 19     | 4                 | 185                     | 21                              | 4                                            | 3                                        | 0                | 5.70.E+07          | 5.90.E+07          | 4.16.E+07          | 5.54.E+07          | 5.01.E+07              | 6.41.E+07              | 4.67.E+07              | 5.81.E+07              |
| 1226 | O75347    | Tubulin-specific chaperone A [OS=Homo sapiens]                                                    | 30.3          | 35           | 4          | 70     | 4                 | 1415                    | 132                             | 4                                            | 4                                        | 0                | 2.01.E+08          | 1.83.E+08          | 2.04.E+08          | 1.89.E+08          | 2.47.E+08              | 2.43.E+08              | 2.56.E+08              | 2.41.E+08              |
| 1227 | Q9Y3C8    | ubiquitin-fold modifier-conjugating enzyme 1 [OS=Homo sapiens]                                    | 30.2          | 34           | 4          | 108    | 4                 | 317                     | 66                              | 4                                            | 4                                        | 0                | 1.12.E+08          | 1.14.E+08          | 1.20.E+08          | 9.52.E+07          | 1.19.E+08              | 1.27.E+08              | 1.35.E+08              | 1.27.E+08              |
| 1228 | P62851    | 40S ribosomal protein S25 [OS=Homo sapiens]                                                       | 30.2          | 26           | 5          | 471    | 5                 | 4922                    | 539                             | 5                                            | 5                                        | 0                | 2.29.E+09          | 2.24.E+09          | 2.35.E+09          | 2.04.E+09          | 2.33.E+09              | 2.28.E+09              | 2.46.E+09              | 2.27.E+09              |
| 1229 | Q96KB5    | Lymphokine-activated killer T-cell-originated protein kinase [OS=Homo sapiens]                    | 30.2          | 27           | 6          | 125    | 6                 | 419                     | 81                              | 6                                            | 6                                        | 0                | 7.78.E+07          | 5.65.E+07          | 6.32.E+07          | 7.41.E+07          | 8.49.E+07              | 9.21.E+07              | 8.59.E+07              | 9.14.E+07              |
| 1230 | Q6Y7W6-1  | GRB10-interacting GYF protein 2 [OS=Homo sapiens]                                                 | 30.1          | 7            | 4          | 104    | 4                 | 385                     | 116                             | 4                                            | 4                                        | 0                | 2.83.E+08          | 7.58.E+07          | 7.26.E+07          | 8.06.E+07          | 7.52.E+07              | 6.58.E+07              | 6.73.E+07              | 7.16.E+07              |
| 1231 | P07108    | acyl-CoA-binding protein [OS=Homo sapiens]                                                        | 30.1          | 41           | 4          | 186    | 4                 | 1019                    | 135                             | 4                                            | 4                                        | 0                | 1.30.E+08          | 2.32.E+08          | 2.32.E+08          | 2.25.E+08          | 3.61.E+08              | 3.47.E+08              | 3.64.E+08              | 3.40.E+08              |
| 1232 | Q9P0V9    | septin-10 [OS=Homo sapiens]                                                                       | 30.0          | 15           | 5          | 91     | 3                 | 650                     | 103                             | 5                                            | 4                                        | 0                | 4.69.E+07          | 5.45.E+07          | 4.77.E+07          | 4.93.E+07          | 6.03.E+07              | 4.93.E+07              | 6.33.E+07              | 5.70.E+07              |
| 1233 | P61758    | Prefoldin subunit 3 [OS=Homo sapiens]                                                             | 29.9          | 28           | 3          | 104    | 3                 | 1984                    | 166                             | 3                                            | 3                                        | 0                | 4.81.E+07          | 5.16.E+07          | 4.49.E+07          | 5.21.E+07          | 3.61.E+07              | 3.63.E+07              | 3.44.E+07              | 3.51.E+07              |
| 1234 | Q9HD45    | Transmembrane 9 superfamily member 3 [OS=Homo sapiens]                                            | 29.8          | 10           | 4          | 122    | 4                 | 731                     | 116                             | 4                                            | 4                                        | 0                | 1.69.E+08          | 1.77.E+08          | 1.70.E+08          | 1.26.E+08          | 2.25.E+08              | 2.02.E+08              | 1.63.E+08              | 1.99.E+08              |
| 1235 | Q96AT9    | ribulose-phosphate 3-epimerase [OS=Homo sapiens]                                                  | 29.8          | 21           | 3          | 110    | 3                 | 1423                    | 151                             | 3                                            | 3                                        | 0                | 1.66.E+08          | 2.19.E+08          | 1.75.E+08          | 1.47.E+08          | 2.30.E+08              | 2.41.E+08              | 2.04.E+08              | 1.77.E+08              |
| 1236 | Q96JY6-1  | PDZ and LIM domain protein 2 [OS=Homo sapiens]                                                    | 29.8          | 21           | 5          | 37     | 5                 | 387                     | 41                              | 4                                            | 5                                        | 0                | 4.25.E+07          | 4.38.E+07          | 4.20.E+07          | 3.83.E+07          | 3.40.E+07              | 2.48.E+07              | 2.39.E+07              | 2.98.E+07              |
| 1237 | Q9Y223-1  | bifunctional UDP-N-acetylglucosamine 2-epimerase/N-acetylmannosamine kinase [OS=Homo sapiens]     | 29.7          | 10           | 6          | 51     | 6                 | 522                     | 54                              | 6                                            | 5                                        | 0                | 7.94.E+07          | 9.36.E+07          | 8.13.E+07          | 8.23.E+07          | 1.17.E+08              | 1.13.E+08              | 1.30.E+08              | 1.21.E+08              |
| 1238 | Q5RI15-1  | Cytochrome c oxidase protein 20 homolog [OS=Homo sapiens]                                         | 29.7          | 53           | 5          | 49     | 5                 | 423                     | 40                              | 3                                            | 5                                        | 0                | 5.44.E+07          | 5.55.E+07          | 4.69.E+07          | 5.25.E+07          | 6.56.E+07              | 6.06.E+07              | 6.29.E+07              | 6.42.E+07              |
| 1239 | Q9BVP2    | Guanine nucleotide-binding protein-like 3 [OS=Homo sapiens]                                       | 29.7          | 14           | 5          | 32     | 5                 | 275                     | 27                              | 5                                            | 4                                        | 0                | 1.08.E+08          | 1.15.E+08          | 1.16.E+08          | 1.20.E+08          | 9.63.E+07              | 6.91.E+07              | 7.90.E+07              | 7.60.E+07              |
| 1240 | P62993    | Growth factor receptor-bound protein 2 [OS=Homo sapiens]                                          | 29.7          | 32           | 5          | 91     | 5                 | 584                     | 83                              | 5                                            | 5                                        | 0                | 7.70.E+07          | 7.91.E+07          | 8.14.E+07          | 8.16.E+07          | 6.86.E+07              | 6.99.E+07              | 6.32.E+07              | 6.91.E+07              |
| 1241 | P62942    | Peptidyl-prolyl cis-trans isomerase FKBP1A [OS=Homo sapiens]                                      | 29.6          | 41           | 3          | 48     | 3                 | 1202                    | 37                              | 2                                            | 3                                        | 0                | 1.95.E+08          | 1.84.E+08          | 1.95.E+08          | 2.06.E+08          | 1.69.E+08              | 1.65.E+08              | 1.83.E+08              | 1.64.E+08              |
| 1242 | Q9Y3U8    | 60S ribosomal protein L36 [OS=Homo sapiens]                                                       | 29.4          | 30           | 4          | 293    | 4                 | 2787                    | 350                             | 4                                            | 4                                        | 0                | 8.86.E+08          | 8.46.E+08          | 8.30.E+08          | 8.74.E+08          | 7.32.E+08              | 7.08.E+08              | 7.46.E+08              | 6.85.E+08              |
| 1243 | Q8WWI1-3  | Isoform 3 of LIM domain only protein 7 [OS=Homo sapiens]                                          | 29.4          | 7            | 6          | 16     | 6                 | 26                      | 26                              | 6                                            | 0                                        | 5.29.E+07        | 5.17.E+07          | 4.86.E+07          | 3.43.E+07          | 5.93.E+07          | 4.07.E+07              | 4.69.E+07              | 4.05.E+07              |                        |
| 1244 | P36405    | ADP-ribosylation factor-like protein 3 [OS=Homo sapiens]                                          | 29.4          | 38           | 5          | 51     | 5                 | 580                     | 43                              | 4                                            | 5                                        | 0                | 8.22.E+07          | 9.13.E+07          | 9.10.E+07          | 9.46.E+07          | 1.36.E+08              | 1.37.E+08              | 1.28.E+08              | 1.35.E+08              |
| 1245 | Q15008    | 26S proteasome non-ATPase regulatory subunit 6 [OS=Homo sapiens]                                  | 29.3          | 17           | 6          | 71     | 6                 | 393                     | 40                              | 6                                            | 5                                        | 0                | 1.40.E+08          | 1.17.E+08          | 1.41.E+08          | 1.51.E+08          | 1.60.E+08              | 1.64.E+08              | 1.58.E+08              | 1.75.E+08              |
| 1246 | O43847-2  | Isoform 2 of Nardilysin [OS=Homo sapiens]                                                         | 29.3          | 6            | 7          | 47     | 7                 | 71                      | 71                              | 7                                            | 0                                        | 1.26.E+08        | 1.35.E+08          | 1.35.E+08          | 1.18.E+08          | 1.70.E+08          | 1.73.E+08              | 1.92.E+08              | 1.79.E+08              |                        |
| 1247 | O43768    | alpha-endosulfine [OS=Homo sapiens]                                                               | 29.2          | 34           | 3          | 68     | 2                 | 1166                    | 31                              | 1                                            | 3                                        | 1                | 8.17.E+07          | 7.78.E+07          | 7.16.E+07          | 8.63.E+07          | 7.21.E+07              | 6.81.E+07              | 6.79.E+07              | 6.74.E+07              |
| 1248 | P61201-2  | Isoform 2 of COP9 signalosome complex subunit 2 [OS=Homo sapiens]                                 | 29.2          | 21           | 6          | 69     | 1                 |                         | 150                             | 6                                            |                                          | 0                |                    |                    |                    |                    |                        |                        |                        |                        |
| 1249 | O95299    | NADH dehydrogenase [ubiquinone] 1 alpha subcomplex subunit 10, mitochondrial [OS=Homo sapiens]    | 29.2          | 19           | 4          | 94     | 4                 | 1985                    | 149                             | 4                                            | 4                                        | 0                | 5.94.E+07          | 8.44.E+07          | 6.36.E+07          | 6.87.E+07          | 6.81.E+07              | 6.75.E+07              | 6.40.E+07              | 7.29.E+07              |
| 1250 | Q15257-1  | Serine/threonine-protein phosphatase 2A activator [OS=Homo sapiens]                               | 29.2          | 18           | 3          | 112    | 3                 | 1647                    | 177                             | 3                                            | 3                                        | 0                | 7.14.E+07          | 7.46.E+07          | 6.73.E+07          | 7.62.E+07          | 9.94.E+07              | 9.65.E+07              | 8.19.E+07              | 9.04.E+07              |
| 1251 | Q9Y6E2    | Basic leucine zipper and W2 domain-containing protein 2 [OS=Homo sapiens]                         | 29.2          | 12           | 4          | 210    | 3                 | 2713                    | 229                             | 4                                            | 4                                        | 0                | 1.15.E+08          | 1.26.E+08          | 1.25.E+08          | 1.27.E+08          | 1.53.E+08              | 1.56.E+08              | 1.40.E+08              | 1.55.E+08              |
| 1252 | O43290    | U4/U6.U5 tri-snRNP-associated protein 1 [OS=Homo sapiens]                                         | 29.2          | 9            | 5          | 43     | 5                 | 193                     | 39                              | 5                                            | 5                                        | 0                | 5.86.E+07          | 4.05.E+07          | 4.01.E+07          | 5.85.E+07          | 6.71.E+07              | 6.92.E+07              | 6.58.E+07              | 6.39.E+07              |
| 1253 | Q7L2E3-1  | Putative ATP-dependent RNA helicase DHX30 [OS=Homo sapiens]                                       | 29.1          | 6            | 4          | 96     | 4                 | 551                     | 57                              | 4                                            | 4                                        | 0                | 4.78.E+07          | 4.73.E+07          | 3.83.E+07          | 4.61.E+07          | 3.78.E+07              | 3.55.E+07              | 2.30.E+07              | 3.58.E+07              |
| 1254 | O43837-1  | isocitrate dehydrogenase [NAD] subunit beta, mitochondrial [OS=Homo sapiens]                      | 29.1          | 14           | 4          | 46     | 4                 | 348                     | 43                              | 4                                            | 4                                        | 0                | 7.17.E+07          | 8.10.E+07          | 7.14.E+07          | 7.49.E+07          | 8.69.E+07              | 8.46.E+07              | 8.47.E+07              | 8.48.E+07              |
| 1255 | Q96CW1    | AP-2 complex subunit mu [OS=Homo sapiens]                                                         | 29.1          | 13           | 4          | 138    | 4                 | 933                     | 172                             | 4                                            | 4                                        | 0                | 7.28.E+07          | 7.41.E+07          | 7.47.E+07          | 6.78.E+07          | 6.94.E+07              | 8.00.E+07              | 7.65.E+07              | 7.30.E+07              |
| 1256 | Q14738-1  | Serine/threonine-protein phosphatase 2A 56 kDa regulatory subunit delta isoform [OS=Homo sapiens] | 29.1          | 10           | 4          | 104    | 1                 | 1467                    | 121                             | 4                                            | 3                                        | 0                |                    |                    |                    |                    |                        |                        |                        |                        |
| 1257 | P30626-1  | Sorcin [OS=Homo sapiens]                                                                          | 29.0          | 33           | 4          | 38     | 4                 | 472                     | 39                              | 4                                            | 4                                        | 0                | 1.10.E+08          | 1.11.E+08          | 1.10.E+08          | 1.15.E+08          | 1.34.E+08              | 1.38.E+08              | 1.45.E+08              | 1.35.E+08              |
| 1258 | Q9HAV4    | exportin-5 [OS=Homo sapiens]                                                                      | 29.0          | 8            | 7          | 159    | 7                 | 960                     | 113                             | 7                                            | 7                                        | 0                | 8.48.E+07          | 9.44.E+07          | 9.20.E+07          | 9.75.E+07          | 1.14.E+08              | 1.18.E+08              | 1.18.E+08              | 1.23.E+08              |
| 1259 | Q9BYD3    | 39S ribosomal protein L4, mitochondrial [OS=Homo sapiens]                                         | 28.9          | 24           | 4          | 53     | 4                 | 321                     | 54                              | 4                                            | 4                                        | 0                | 6.28.E+07          | 7.05.E+07          | 6.39.E+07          | 7.09.E+07          | 6.79.E+07              | 7.49.E+07              | 6.95.E+07              | 7.77.E+07              |
| 1260 | O15031    | Plexin-B2 [OS=Homo sapiens]                                                                       | 28.9          | 6            | 5          | 96     | 5                 | 302                     | 15                              | 5                                            | 5                                        | 0                | 4.56.E+07          | 4.82.E+07          | 4.19.E+07          | 4.12.E+07          | 6.28.E+07              | 5.63.E+07              | 4.23.E+07              | 6.00.E+07              |
| 1261 | Q9UG63    | ATP-binding cassette sub-family F member 2 [OS=Homo sapiens]                                      | 28.9          | 10           | 5          | 78     | 5                 | 419                     | 87                              | 5                                            | 5                                        | 0                | 9.22.E+07          | 1.07.E+08          | 1.08.E+08          | 9.71.E+07          | 9.51.E+07              | 9.84.E+07              | 1.03.E+08              | 1.20.E+08              |
| 1262 | Q86X76    | Nitrilase homolog 1 [OS=Homo sapiens]                                                             | 28.9          | 16           | 4          | 126    | 4                 | 845                     | 128                             | 4                                            | 4                                        | 0                | 6.13.E+07          | 6.82.E+07          | 6.79.E+07          | 6.65.E+07          | 6.54.E+07              | 6.44.E+07              | 6.03.E+07              | 6.13.E+07              |
| 1263 | O43747-1  | AP-1 complex subunit gamma-1 [OS=Homo sapiens]                                                    | 28.8          | 9            | 4          | 84     | 4                 | 344                     | 57                              | 4                                            | 4                                        | 0                | 2.49.E+08          | 2.69.E+08          | 2.35.E+08          | 2.42.E+08          | 1.51.E+08              | 1.44.E+08              | 1.35.E+08              | 1.44.E+08              |
| 1264 | P51148    | Ras-related protein Rab-5C [OS=Homo sapiens]                                                      | 28.6          | 22           | 4          | 125    | 2                 | 1076                    | 157                             | 4                                            | 4                                        | 2                | 1.79.E+08          | 1.67.E+08          | 1.71.E+08          | 1.63.E+08          | 1.82.E+08              | 1.71.E+08              | 2.24.E+08              | 1.72.E+08              |
| 1265 | P18859    | ATP synthase-coupling factor 6, mitochondrial [OS=Homo sapiens]                                   | 28.6          | 34           | 3          | 176    | 3                 | 3695                    | 299                             | 3                                            | 3                                        | 0                | 2.24.E+08          | 2.20.E+08          | 2.30.E+08          | 1.91.E+08          | 2.55.E+08              | 2.58.E+08              | 2.56.E+08              | 2.38.E+08              |
| 1266 | O14745    | Na(+)/H(+) exchange regulatory cofactor NHE-RF1 [OS=Homo sapiens]                                 | 28.6          | 18           | 4          | 91     | 4                 | 877                     | 95                              | 4                                            | 4                                        | 0                | 1.07.E+08          | 1.07.E+08          | 1.13.E+08          | 1.06.E+08          | 8.99.E+07              | 8.77.E+07              | 9.42.E+07              | 8.65.E+07              |
| 1267 | Q9H6R4-1  | Nucleolar protein 6 [OS=Homo sapiens]                                                             | 28.4          | 7            | 4          | 49     | 4                 | 327                     | 55                              | 4                                            | 4                                        | 0                | 7.03.E+07          | 6.64.E+07          | 7.12.E+07          | 7.72.E+07          | 6.04.E+07              | 6.86.E+07              | 6.84.E+07              | 6.71.E+07              |
| 1268 | Q96124-1  | Far upstream element-binding protein 3 [OS=Homo sapiens]                                          | 28.4          | 12           | 5          | 119    | 3                 | 702                     | 115                             | 5                                            | 5                                        | 0                | 1.43.E+08          | 1.35.E+08          | 1.49.E+08          | 1.71.E+08          | 1.32.E+08              | 1.41.E+08              | 1.56.E+08              | 1.43.E+08              |
| 1269 | O43324-1  | Eukaryotic translation elongation factor 1 epsilon-1 [OS=Homo sapiens]                            | 28.4          | 42           | 5          | 107    | 5                 | 1517                    | 114                             | 4                                            | 5                                        | 0                | 2.03.E+08          | 2.03.E+08          | 2.05.E+08          | 1.96.E+08          | 2.78.E+08              | 2.80.E+08              | 2.19.E+08              | 2.33.E+08              |
| 1270 | Q9UBP6    | tRNA (guanine-N(7)-)-methyltransferase [OS=Homo sapiens]                                          | 28.4          | 17           | 4          | 66     | 4                 | 439                     | 33                              | 4                                            | 4                                        | 0                | 7.75.E+07          | 8.81.E+07          | 8.39.E+07          | 8.37.E+07          | 8.93.E+07              | 9.03.E+07              | 9.29.E+07              | 8.35.E+07              |



| No.  | Accession | Description                                                                                                      | Sum PEP Score | Coverage [%] | # Peptides | # PSMs | # Unique Peptides | Score Mascot: A5 Mascot | Score Sequest HT: A2 Sequest HT | # Peptides (by Search Engine): A2 Sequest HT | # Peptides (by Search Engine): A5 Mascot | # Razor Peptides | ctrl Abundance s_1 | ctrl Abundance s_2 | ctrl Abundance s_3 | ctrl Abundance s_4 | JAM-A KO Abundance s_1 | JAM-A KO Abundance s_2 | JAM-A KO Abundance s_3 | JAM-A KO Abundance s_4 |
|------|-----------|------------------------------------------------------------------------------------------------------------------|---------------|--------------|------------|--------|-------------------|-------------------------|---------------------------------|----------------------------------------------|------------------------------------------|------------------|--------------------|--------------------|--------------------|--------------------|------------------------|------------------------|------------------------|------------------------|
| 1271 | Q99538    | Legumain [OS=Homo sapiens]                                                                                       | 28.4          | 12           | 3          | 110    | 3                 | 2501                    | 175                             | 3                                            | 3                                        | 0                | 5.64.E+07          | 6.12.E+07          | 5.78.E+07          | 6.84.E+07          | 8.67.E+07              | 8.36.E+07              | 8.37.E+07              | 8.88.E+07              |
| 1272 | Q92734-1  | Protein TFG [OS=Homo sapiens]                                                                                    | 28.4          | 14           | 3          | 97     | 3                 | 489                     | 147                             | 3                                            | 3                                        | 0                | 1.57.E+08          | 1.56.E+08          | 1.51.E+08          | 1.74.E+08          | 1.91.E+08              | 1.88.E+08              | 1.87.E+08              | 1.88.E+08              |
| 1273 | Q9P1F3    | Costars family protein ABRACL [OS=Homo sapiens]                                                                  | 28.3          | 40           | 3          | 110    | 3                 | 1440                    | 130                             | 3                                            | 3                                        | 0                | 6.55.E+07          | 6.77.E+07          | 7.48.E+07          | 7.48.E+07          | 9.17.E+07              | 8.81.E+07              | 7.17.E+07              | 7.92.E+07              |
| 1274 | Q9NRX2    | 39S ribosomal protein L17, mitochondrial [OS=Homo sapiens]                                                       | 28.3          | 14           | 2          | 78     | 2                 | 1188                    | 117                             | 2                                            | 2                                        | 0                | 5.43.E+07          | 6.02.E+07          | 5.01.E+07          | 5.44.E+07          | 5.63.E+07              | 5.71.E+07              | 5.99.E+07              | 6.08.E+07              |
| 1275 | O75915    | PRA1 family protein 3 [OS=Homo sapiens]                                                                          | 28.3          | 16           | 2          | 82     | 2                 | 1510                    | 81                              | 2                                            | 2                                        | 0                | 1.24.E+08          | 1.32.E+08          | 1.63.E+08          | 1.55.E+08          | 1.65.E+08              | 1.25.E+08              | 1.21.E+08              | 1.84.E+08              |
| 1276 | Q8IY81    | pre-rRNA processing protein FTSJ3 [OS=Homo sapiens]                                                              | 28.3          | 14           | 6          | 53     | 6                 | 419                     | 26                              | 6                                            | 5                                        | 0                | 3.00.E+07          | 3.54.E+07          | 3.05.E+07          | 3.11.E+07          | 2.31.E+07              | 3.04.E+07              | 2.56.E+07              | 1.28.E+07              |
| 1277 | P52434    | DNA-directed RNA polymerases I, II, and III subunit RPABC3 [OS=Homo sapiens]                                     | 28.2          | 23           | 3          | 52     | 3                 | 1709                    | 0                               | 1                                            | 2                                        | 0                | 6.43.E+07          | 6.47.E+07          | 5.65.E+07          | 6.73.E+07          | 4.31.E+07              | 4.02.E+07              | 3.64.E+07              | 3.96.E+07              |
| 1278 | Q14203    | Dynactin subunit 1 [OS=Homo sapiens]                                                                             | 28.2          | 8            | 6          | 62     | 6                 | 453                     | 70                              | 6                                            | 5                                        | 0                | 8.67.E+07          | 6.62.E+07          | 9.60.E+07          | 8.57.E+07          | 1.18.E+08              | 1.19.E+08              | 7.82.E+07              | 1.19.E+08              |
| 1279 | Q9Y3A5    | Ribosome maturation protein SBDS [OS=Homo sapiens]                                                               | 28.1          | 31           | 8          | 166    | 8                 | 451                     | 189                             | 7                                            | 8                                        | 0                | 2.94.E+08          | 2.74.E+08          | 2.98.E+08          | 3.10.E+08          | 2.89.E+08              | 2.82.E+08              | 3.15.E+08              | 2.86.E+08              |
| 1280 | P43897    | Elongation factor Ts, mitochondrial [OS=Homo sapiens]                                                            | 28.0          | 18           | 3          | 36     | 3                 | 292                     | 48                              | 3                                            | 3                                        | 0                | 2.28.E+06          | 5.05.E+07          | 2.40.E+06          | 4.66.E+07          | 3.77.E+07              | 4.04.E+05              | 3.62.E+07              | 3.62.E+07              |
| 1281 | O43681    | ATPase ASNA1 [OS=Homo sapiens]                                                                                   | 28.0          | 20           | 6          | 186    | 6                 | 681                     | 127                             | 6                                            | 6                                        | 0                | 4.39.E+08          | 4.77.E+08          | 5.04.E+08          | 4.91.E+08          | 5.83.E+08              | 5.99.E+08              | 6.02.E+08              | 6.44.E+08              |
| 1282 | P08237    | ATP-dependent 6-phosphofructokinase, muscle type [OS=Homo sapiens]                                               | 27.9          | 9            | 4          | 143    | 3                 | 758                     | 161                             | 3                                            | 4                                        | 0                | 1.53.E+07          | 1.98.E+07          | 1.30.E+07          | 1.26.E+07          | 2.64.E+07              | 2.57.E+07              | 1.70.E+07              | 2.29.E+07              |
| 1283 | Q2NL82    | Pre-rRNA-processing protein TSR1 homolog [OS=Homo sapiens]                                                       | 27.9          | 10           | 5          | 76     | 5                 | 113                     | 65                              | 5                                            | 5                                        | 0                | 7.78.E+07          | 8.82.E+07          | 8.41.E+07          | 8.95.E+07          | 6.60.E+07              | 5.78.E+07              | 6.35.E+07              | 5.82.E+07              |
| 1284 | Q9UJU6-1  | Drebrin-like protein [OS=Homo sapiens]                                                                           | 27.9          | 10           | 3          | 60     | 3                 | 1194                    | 87                              | 3                                            | 3                                        | 0                | 2.27.E+07          | 2.74.E+07          | 2.53.E+07          | 3.35.E+07          | 3.52.E+07              | 3.20.E+07              | 2.83.E+07              | 3.27.E+07              |
| 1285 | Q13596    | Sorting nexin-1 [OS=Homo sapiens]                                                                                | 27.9          | 12           | 5          | 81     | 4                 | 317                     | 89                              | 5                                            | 5                                        | 1                | 1.86.E+08          | 1.58.E+08          | 1.66.E+08          | 1.73.E+08          | 1.39.E+08              | 1.94.E+08              | 1.60.E+08              | 1.37.E+08              |
| 1286 | Q9BYT8    | Neurolysin, mitochondrial [OS=Homo sapiens]                                                                      | 27.8          | 10           | 5          | 54     | 5                 | 321                     | 54                              | 5                                            | 5                                        | 0                | 5.96.E+07          | 6.88.E+07          | 5.11.E+07          | 5.37.E+07          | 8.98.E+07              | 8.03.E+07              | 8.39.E+07              | 8.75.E+07              |
| 1287 | Q8N5K1    | CDGSH iron-sulfur domain-containing protein 2 [OS=Homo sapiens]                                                  | 27.8          | 26           | 4          | 128    | 4                 | 1088                    | 153                             | 4                                            | 4                                        | 0                | 1.24.E+08          | 1.32.E+08          | 1.33.E+08          | 1.20.E+08          | 1.52.E+08              | 1.76.E+08              | 1.60.E+08              | 1.70.E+08              |
| 1288 | O43272    | Proline dehydrogenase 1, mitochondrial [OS=Homo sapiens]                                                         | 27.8          | 15           | 5          | 26     | 5                 | 133                     | 38                              | 5                                            | 5                                        | 0                | 1.28.E+08          | 1.67.E+08          | 1.38.E+08          | 1.62.E+08          | 5.90.E+07              | 6.51.E+07              | 5.70.E+07              | 5.95.E+07              |
| 1289 | Q9BYD6    | 39S ribosomal protein L1, mitochondrial [OS=Homo sapiens]                                                        | 27.7          | 20           | 4          | 81     | 4                 | 715                     | 75                              | 4                                            | 4                                        | 0                | 8.66.E+07          | 1.41.E+08          | 9.38.E+07          | 2.18.E+08          | 1.50.E+08              | 1.43.E+08              | 1.60.E+08              | 1.42.E+08              |
| 1290 | O15127    | Secretory carrier-associated membrane protein 2 [OS=Homo sapiens]                                                | 27.7          | 10           | 2          | 120    | 2                 | 2566                    | 195                             | 2                                            | 2                                        | 0                | 1.30.E+08          | 1.28.E+08          | 1.28.E+08          | 1.65.E+08          | 1.65.E+08              | 1.47.E+08              | 1.70.E+08              | 1.72.E+08              |
| 1291 | P61024    | cyclin-dependent kinases regulatory subunit 1 [OS=Homo sapiens]                                                  | 27.7          | 53           | 2          | 78     | 2                 | 1257                    | 135                             | 2                                            | 2                                        | 0                | 9.75.E+07          | 1.01.E+08          | 9.44.E+07          | 9.67.E+07          | 1.08.E+08              | 9.52.E+07              | 8.51.E+07              | 7.45.E+07              |
| 1292 | Q9Y3B8-1  | Oligoribonuclease, mitochondrial [OS=Homo sapiens]                                                               | 27.7          | 17           | 3          | 66     | 3                 | 1586                    | 89                              | 3                                            | 3                                        | 0                | 5.01.E+07          | 4.82.E+07          | 4.59.E+07          | 4.81.E+07          | 6.99.E+07              | 7.21.E+07              | 7.97.E+07              | 7.81.E+07              |
| 1293 | P21926    | CD9 antigen [OS=Homo sapiens]                                                                                    | 27.6          | 15           | 2          | 188    | 2                 | 4230                    | 412                             | 2                                            | 2                                        | 0                | 2.52.E+08          | 2.73.E+08          | 2.94.E+08          | 2.67.E+08          | 2.52.E+08              | 2.42.E+08              | 2.56.E+08              | 2.51.E+08              |
| 1294 | Q02241-1  | Kinesin-like protein KIF23 [OS=Homo sapiens]                                                                     | 27.6          | 7            | 4          | 68     | 4                 | 710                     | 29                              | 4                                            | 4                                        | 0                | 5.05.E+07          | 6.20.E+07          | 5.07.E+07          | 6.84.E+07          | 3.61.E+07              | 7.45.E+07              | 3.01.E+07              | 7.48.E+07              |
| 1295 | Q16795    | NADH dehydrogenase [ubiquinone] 1 alpha subcomplex subunit 9, mitochondrial [OS=Homo sapiens]                    | 27.5          | 17           | 5          | 102    | 5                 | 407                     | 88                              | 5                                            | 5                                        | 0                | 6.38.E+07          | 7.53.E+07          | 5.93.E+07          | 6.64.E+07          | 7.70.E+07              | 6.75.E+07              | 6.18.E+07              | 7.25.E+07              |
| 1296 | Q13243-1  | Serine/arginine-rich splicing factor 5 [OS=Homo sapiens]                                                         | 27.5          | 23           | 4          | 72     | 4                 | 576                     | 112                             | 4                                            | 4                                        | 0                | 6.99.E+07          | 7.16.E+07          | 6.95.E+07          | 7.37.E+07          | 8.18.E+07              | 8.77.E+07              | 8.85.E+07              | 9.42.E+07              |
| 1297 | P10909-1  | Clusterin [OS=Homo sapiens]                                                                                      | 27.4          | 13           | 4          | 93     | 4                 | 168                     | 50                              | 4                                            | 4                                        | 0                | 5.61.E+07          | 5.39.E+07          | 5.45.E+07          | 5.67.E+07          | 7.23.E+07              | 6.21.E+07              | 6.95.E+07              | 6.48.E+07              |
| 1298 | Q06124    | tyrosine-protein phosphatase non-receptor type 11 [OS=Homo sapiens]                                              | 27.3          | 12           | 5          | 38     | 5                 | 593                     | 57                              | 5                                            | 5                                        | 0                | 2.29.E+07          | 2.96.E+07          | 2.86.E+07          | 3.53.E+07          | 4.03.E+07              | 4.01.E+07              | 3.83.E+07              | 4.63.E+07              |
| 1299 | P14174    | Macrophage Migration inhibitory factor [OS=Homo sapiens]                                                         | 27.3          | 17           | 2          | 294    | 2                 | 6188                    | 171                             | 1                                            | 2                                        | 0                | 7.35.E+09          | 7.43.E+09          | 7.44.E+09          | 6.56.E+09          | 6.61.E+09              | 6.47.E+09              | 6.82.E+09              | 6.66.E+09              |
| 1300 | Q13126-1  | S-methyl-5'-thioadenosine phosphorylase [OS=Homo sapiens]                                                        | 27.2          | 14           | 2          | 144    | 2                 | 3086                    | 236                             | 2                                            | 2                                        | 0                | 4.53.E+07          | 8.29.E+07          | 6.48.E+07          | 8.01.E+07          | 9.43.E+07              | 9.52.E+07              | 7.09.E+07              | 9.23.E+07              |
| 1301 | P53367    | Arfaptin-1 [OS=Homo sapiens]                                                                                     | 27.1          | 20           | 4          | 97     | 4                 | 722                     | 123                             | 4                                            | 4                                        | 0                | 3.65.E+07          | 3.40.E+07          | 3.29.E+07          | 3.64.E+07          | 3.33.E+07              | 3.69.E+07              | 3.45.E+07              | 3.19.E+07              |
| 1302 | P54709    | sodium/potassium-transporting ATPase subunit beta-3 [OS=Homo sapiens]                                            | 27.0          | 18           | 4          | 52     | 4                 | 407                     | 40                              | 4                                            | 3                                        | 0                | 1.74.E+08          | 1.65.E+08          | 1.76.E+08          | 1.68.E+08          | 2.36.E+08              | 2.26.E+08              | 2.23.E+08              | 1.89.E+08              |
| 1303 | P62495    | Eukaryotic peptide chain release factor subunit 1 [OS=Homo sapiens]                                              | 27.0          | 18           | 5          | 63     | 5                 | 554                     | 46                              | 4                                            | 4                                        | 0                | 1.49.E+08          | 1.43.E+08          | 1.49.E+08          | 1.30.E+08          | 1.46.E+08              | 1.53.E+08              | 1.64.E+08              | 1.53.E+08              |
| 1304 | O15212    | Prefoldin subunit 6 [OS=Homo sapiens]                                                                            | 27.0          | 46           | 4          | 171    | 4                 | 1556                    | 151                             | 4                                            | 4                                        | 0                | 1.60.E+08          | 1.69.E+08          | 1.66.E+08          | 1.41.E+08          | 1.79.E+08              | 1.71.E+08              | 1.75.E+08              | 1.73.E+08              |
| 1305 | Q96F86    | Enhancer of mRNA-decapping protein 3 [OS=Homo sapiens]                                                           | 27.0          | 10           | 2          | 60     | 2                 | 345                     | 45                              | 2                                            | 2                                        | 0                | 2.80.E+07          | 2.84.E+07          | 1.82.E+07          | 2.73.E+07          | 2.81.E+07              | 2.43.E+07              | 2.27.E+07              | 2.38.E+07              |
| 1306 | O75494-1  | Serine/arginine-rich splicing factor 10 [OS=Homo sapiens]                                                        | 27.0          | 19           | 4          | 115    | 4                 | 1496                    | 154                             | 4                                            | 3                                        | 0                | 9.70.E+07          | 9.16.E+07          | 7.36.E+07          | 8.39.E+07          | 9.12.E+07              | 9.00.E+07              | 8.47.E+07              | 8.59.E+07              |
| 1307 | P80297    | metallothionein-1X [OS=Homo sapiens]                                                                             | 26.8          | 54           | 3          | 106    | 3                 | 1199                    | 51                              | 3                                            | 3                                        | 0                | 4.08.E+07          | 4.35.E+07          | 3.58.E+07          | 3.56.E+07          | 9.44.E+06              | 1.07.E+07              | 9.81.E+06              | 9.51.E+06              |
| 1308 | Q9Y6A9    | Signal peptidase complex subunit 1 [OS=Homo sapiens]                                                             | 26.8          | 17           | 1          | 64     | 1                 | 663                     | 88                              | 1                                            | 1                                        | 0                | 6.08.E+07          | 5.63.E+07          | 5.77.E+07          | 6.90.E+07          | 5.61.E+07              | 5.76.E+07              | 6.70.E+07              | 6.37.E+07              |
| 1309 | Q9UHL4    | Dipeptidyl peptidase 2 [OS=Homo sapiens]                                                                         | 26.8          | 9            | 3          | 33     | 3                 | 289                     | 33                              | 3                                            | 3                                        | 0                | 2.94.E+07          | 2.90.E+07          | 3.19.E+07          | 3.83.E+07          | 2.07.E+07              | 1.81.E+07              | 1.90.E+07              | 1.67.E+07              |
| 1310 | Q5T1J5    | Putative coiled-coil-helix-coiled-coil-helix domain-containing protein CHCHD2P9, mitochondrial [OS=Homo sapiens] | 26.8          | 27           | 2          | 70     | 2                 | 1564                    | 149                             | 2                                            | 2                                        | 0                | 5.39.E+07          | 5.21.E+07          | 5.46.E+07          | 5.64.E+07          | 7.93.E+07              | 7.30.E+07              | 7.44.E+07              | 7.06.E+07              |
| 1311 | O60488-1  | Long-chain-fatty-acid-CoA ligase 4 [OS=Homo sapiens]                                                             | 26.7          | 8            | 3          | 57     | 1                 | 697                     | 64                              | 3                                            | 3                                        | 0                | 4.49.E+06          | 2.74.E+06          | 1.92.E+06          | 3.02.E+06          | 7.77.E+06              | 3.52.E+06              | 3.17.E+06              | 8.17.E+06              |
| 1312 | Q9BXW7    | Haloacid dehalogenase-like hydrolase domain-containing 5 [OS=Homo sapiens]                                       | 26.7          | 17           | 3          | 12     | 3                 | 149                     | 14                              | 3                                            | 3                                        | 0                | 2.18.E+07          | 2.33.E+07          | 1.61.E+07          | 2.00.E+07          | 1.86.E+07              | 2.01.E+07              | 1.31.E+07              | 1.27.E+07              |
| 1313 | Q07866-1  | Kinesin light chain 1 [OS=Homo sapiens]                                                                          | 26.6          | 17           | 6          | 81     | 6                 | 456                     | 19                              | 6                                            | 5                                        | 0                | 5.94.E+07          | 6.51.E+07          | 6.43.E+07          | 6.91.E+07          | 1.32.E+08              | 9.01.E+07              | 1.18.E+08              | 1.26.E+08              |
| 1314 | Q6UN15-1  | Pre-mRNA 3'-end-processing factor FIP1 [OS=Homo sapiens]                                                         | 26.6          | 17           | 5          | 56     | 5                 | 768                     | 55                              | 5                                            | 5                                        | 0                | 3.77.E+07          | 7.46.E+07          | 4.60.E+07          | 1.09.E+08          | 8.73.E+07              | 7.61.E+07              | 5.21.E+07              | 9.77.E+07              |
| 1315 | P10644    | cAMP-dependent protein kinase type I-alpha regulatory subunit [OS=Homo sapiens]                                  | 26.6          | 15           | 5          | 61     | 5                 | 539                     | 65                              | 5                                            | 5                                        | 0                | 1.10.E+08          | 1.06.E+08          | 1.17.E+08          | 1.20.E+08          | 1.13.E+08              | 9.57.E+07              | 1.08.E+08              | 1.11.E+08              |
| 1316 | O14929    | histone acetyltransferase type B catalytic subunit [OS=Homo sapiens]                                             | 26.6          | 16           | 3          | 48     | 3                 | 839                     | 62                              | 3                                            | 3                                        | 0                | 5.25.E+07          | 4.96.E+07          | 3.64.E+07          | 5.26.E+07          | 7.03.E+07              | 7.36.E+07              | 5.70.E+07              | 5.93.E+07              |
| 1317 | Q9UUK9    | ADP-sugar pyrophosphatase [OS=Homo sapiens]                                                                      | 26.5          | 31           | 4          | 83     | 4                 | 544                     | 122                             | 4                                            | 4                                        | 0                | 1.71.E+08          | 1.57.E+08          | 1.51.E+08          | 1.56.E+08          | 1.70.E+08              | 1.67.E+08              | 1.59.E+08              | 1.73.E+08              |
| 1318 | P30038    | Delta-1-pyrroline-5-carboxylate dehydrogenase, mitochondrial [OS=Homo sapiens]                                   | 26.5          | 11           | 4          | 102    | 4                 | 977                     | 117                             | 4                                            | 4                                        | 0                | 8.57.E+07          | 8.41.E+07          | 8.25.E+07          | 8.86.E+07          | 1.02.E+08              | 9.34.E+07              | 8.70.E+07              | 8.66.E+07              |
| 1319 | Q9H910-1  | Jupiter microtubule associated homolog 2 [OS=Homo sapiens]                                                       | 26.5          | 44           | 5          | 96     | 5                 | 1049                    | 131                             | 5                                            | 4                                        | 0                | 1.13.E+08          | 8.91.E+07          | 1.09.E+08          | 8.37.E+07          | 2.17.E+08              | 2.14.E+08              | 2.38.E+08              | 2.22.E+08              |
| 1320 | Q9NP81-1  | Serine-tRNA ligase, mitochondrial [OS=Homo sapiens]                                                              | 26.4          | 12           | 4          | 38     | 4                 | 433                     | 51                              | 4                                            | 4                                        | 0                | 4.69.E+07          | 4.00.E+07          | 3.93.E+07          | 4.68.E+07          | 3.81.E+07              | 2.75.E+07              | 2.94.E+07              | 2.18.E+07              |
| 1321 | Q9H7Z7    | Prostaglandin E synthase 2 [OS=Homo sapiens]                                                                     | 26.3          | 23           | 4          | 108    | 4                 | 820                     | 147                             | 4                                            | 4                                        | 0                | 7.12.E+07          | 7.36.E+07          | 7.14.E+07          | 6.03.E+07          | 6.96.E+07              | 6.80.E+07              | 5.79.E+07              | 6.60.E+07              |

| No.  | Accession | Description                                                                                    | Sum PEP Score | Coverage [%] | # Peptides | # PSMs | # Unique Peptides | Score Mascot: A5 Mascot | Score Sequest HT: A2 Sequest HT | # Peptides (by Search Engine): A2 Sequest HT | # Peptides (by Search Engine): A5 Mascot | # Razor Peptides | ctrl Abundance s_1 | ctrl Abundance s_2 | ctrl Abundance s_3 | ctrl Abundance s_4 | JAM-A KO Abundance s_1 | JAM-A KO Abundance s_2 | JAM-A KO Abundance s_3 | JAM-A KO Abundance s_4 |
|------|-----------|------------------------------------------------------------------------------------------------|---------------|--------------|------------|--------|-------------------|-------------------------|---------------------------------|----------------------------------------------|------------------------------------------|------------------|--------------------|--------------------|--------------------|--------------------|------------------------|------------------------|------------------------|------------------------|
| 1322 | P40616    | ADP-ribosylation factor-like protein 1 [OS=Homo sapiens]                                       | 26.3          | 36           | 4          | 104    | 4                 | 1686                    | 133                             | 4                                            | 4                                        | 0                | 8.02.E+07          | 8.11.E+07          | 7.47.E+07          | 7.59.E+07          | 8.44.E+07              | 8.54.E+07              | 6.64.E+07              | 7.85.E+07              |
| 1323 | Q9UBF2    | Coatomer subunit gamma-2 [OS=Homo sapiens]                                                     | 26.3          | 7            | 3          | 190    | 2                 | 2298                    | 224                             | 3                                            | 3                                        | 0                | 1.53.E+07          | 1.18.E+07          | 1.49.E+07          | 1.46.E+07          | 1.61.E+07              | 1.43.E+07              | 1.72.E+07              | 1.38.E+07              |
| 1324 | Q63HN8-3  | E3 ubiquitin-protein ligase RNF213 [OS=Homo sapiens]                                           | 26.3          | 2            | 5          | 65     | 5                 | 1062                    | 91                              | 5                                            | 5                                        | 0                | 3.95.E+07          | 4.06.E+07          | 3.80.E+07          | 3.74.E+07          | 6.26.E+07              | 5.15.E+07              | 4.20.E+07              | 4.03.E+07              |
| 1325 | O95810    | caveolae-associated protein 2 [OS=Homo sapiens]                                                | 26.2          | 8            | 2          | 86     | 2                 | 1462                    | 117                             | 2                                            | 2                                        | 0                | 2.24.E+07          | 2.59.E+07          | 2.23.E+07          | 4.31.E+07          | 3.09.E+07              | 5.84.E+07              | 4.86.E+07              | 2.80.E+07              |
| 1326 | O60437    | periplakin [OS=Homo sapiens]                                                                   | 26.2          | 4            | 4          | 34     | 4                 | 138                     | 42                              | 4                                            | 4                                        | 0                | 5.51.E+07          | 5.98.E+07          | 5.98.E+07          | 5.98.E+07          | 7.39.E+07              | 7.27.E+07              | 6.21.E+07              | 4.37.E+07              |
| 1327 | P46977    | Dolichyl-diphosphooligosaccharide--protein glycosyltransferase subunit STT3A [OS=Homo sapiens] | 26.2          | 6            | 3          | 82     | 3                 | 350                     | 53                              | 3                                            | 3                                        | 0                | 8.98.E+07          | 8.26.E+07          | 8.41.E+07          | 7.86.E+07          | 8.23.E+07              | 7.70.E+07              | 8.40.E+07              | 8.38.E+07              |
| 1328 | Q15370    | Elongin-B [OS=Homo sapiens]                                                                    | 26.1          | 46           | 4          | 114    | 4                 | 148                     | 130                             | 4                                            | 4                                        | 0                | 1.70.E+08          | 1.59.E+08          | 1.46.E+08          | 1.63.E+08          | 2.18.E+08              | 2.07.E+08              | 1.88.E+08              | 1.92.E+08              |
| 1329 | P50402    | Emerin [OS=Homo sapiens]                                                                       | 26.1          | 22           | 4          | 65     | 4                 | 214                     | 53                              | 4                                            | 4                                        | 0                | 5.42.E+07          | 5.66.E+07          | 4.61.E+07          | 5.89.E+07          | 6.10.E+07              | 5.85.E+07              | 4.73.E+07              | 6.51.E+07              |
| 1330 | P61960    | Ubiquitin-fold modifier 1 [OS=Homo sapiens]                                                    | 26.1          | 59           | 2          | 144    | 2                 | 2808                    | 258                             | 2                                            | 2                                        | 0                | 1.24.E+08          | 1.35.E+08          | 1.29.E+08          | 1.36.E+08          | 1.78.E+08              | 1.71.E+08              | 1.39.E+08              | 1.79.E+08              |
| 1331 | Q8NBJ7-1  | Sulfatase-modifying factor 2 [OS=Homo sapiens]                                                 | 26.1          | 19           | 4          | 146    | 4                 | 577                     | 171                             | 4                                            | 3                                        | 0                | 9.94.E+07          | 8.19.E+07          | 1.20.E+08          | 8.80.E+07          | 1.35.E+08              | 1.34.E+08              | 1.37.E+08              | 1.45.E+08              |
| 1332 | P07203    | Glutathione peroxidase 1 [OS=Homo sapiens]                                                     | 26.1          | 33           | 3          | 57     | 3                 | 419                     | 72                              | 3                                            | 3                                        | 0                | 4.82.E+07          | 4.48.E+07          | 7.07.E+07          | 4.37.E+07          | 8.72.E+07              | 7.72.E+07              | 6.80.E+07              | 5.29.E+07              |
| 1333 | Q5T0N5-1  | Formin-binding protein 1-like [OS=Homo sapiens]                                                | 26.0          | 4            | 2          | 18     | 2                 | 756                     | 25                              | 2                                            | 1                                        | 0                | 2.70.E+07          | 2.65.E+07          | 2.38.E+07          | 2.49.E+07          | 2.07.E+07              | 2.38.E+07              | 2.34.E+07              | 2.44.E+07              |
| 1334 | Q13595-1  | Transformer-2 protein homolog alpha [OS=Homo sapiens]                                          | 26.0          | 19           | 4          | 78     | 3                 | 1069                    | 98                              | 4                                            | 4                                        | 0                | 6.24.E+07          | 1.04.E+08          | 7.34.E+07          | 9.75.E+07          | 6.74.E+07              | 7.47.E+07              | 7.17.E+07              | 7.99.E+07              |
| 1335 | Q8WTT2    | Nucleolar complex protein 3 homolog [OS=Homo sapiens]                                          | 25.9          | 3            | 1          | 24     | 1                 | 162                     | 51                              | 1                                            | 1                                        | 0                | 2.21.E+07          | 2.11.E+07          | 2.49.E+07          | 2.19.E+07          | 1.83.E+07              | 2.06.E+07              | 2.14.E+07              | 1.80.E+07              |
| 1336 | P52594-1  | Arf-GAP domain and FG repeat-containing protein 1 [OS=Homo sapiens]                            | 25.9          | 10           | 2          | 6      | 2                 | 138                     | 9                               | 2                                            | 2                                        | 0                | 1.39.E+07          | 1.62.E+07          | 1.51.E+07          | 1.68.E+07          | 2.27.E+07              | 1.95.E+07              | 1.61.E+07              | 2.42.E+07              |
| 1337 | O95470    | sphingosine-1-phosphate lyase 1 [OS=Homo sapiens]                                              | 25.8          | 8            | 3          | 56     | 3                 | 565                     | 73                              | 3                                            | 3                                        | 0                | 5.98.E+07          | 6.25.E+07          | 6.10.E+07          | 5.86.E+07          | 7.20.E+07              | 6.67.E+07              | 6.96.E+07              | 7.04.E+07              |
| 1338 | Q9NWH9-1  | SAFB-like transcription modulator [OS=Homo sapiens]                                            | 25.8          | 6            | 4          | 39     | 4                 | 145                     | 26                              | 3                                            | 4                                        | 0                | 1.44.E+07          | 1.49.E+07          | 1.47.E+07          | 1.72.E+07          | 1.92.E+07              | 1.83.E+07              | 1.85.E+07              | 1.85.E+07              |
| 1339 | O75312    | Zinc finger protein ZPR1 [OS=Homo sapiens]                                                     | 25.7          | 11           | 4          | 31     | 4                 | 393                     | 30                              | 4                                            | 4                                        | 0                | 4.79.E+07          | 5.03.E+07          | 5.03.E+07          | 4.84.E+07          | 2.61.E+07              | 2.98.E+07              | 2.80.E+07              | 2.80.E+07              |
| 1340 | Q96C19    | EF-hand domain-containing protein D2 [OS=Homo sapiens]                                         | 25.7          | 28           | 6          | 64     | 6                 | 475                     | 38                              | 6                                            | 6                                        | 0                | 8.96.E+07          | 8.30.E+07          | 6.71.E+07          | 9.40.E+07          | 5.16.E+07              | 6.19.E+07              | 5.68.E+07              | 6.17.E+07              |
| 1341 | Q9BZE4    | Nucleolar GTP-binding protein 1 [OS=Homo sapiens]                                              | 25.6          | 9            | 4          | 22     | 4                 | 149                     | 23                              | 4                                            | 3                                        | 0                | 1.04.E+08          | 9.30.E+07          | 1.03.E+08          | 9.66.E+07          | 8.75.E+07              | 1.02.E+08              | 1.07.E+08              | 9.75.E+07              |
| 1342 | Q9NX24    | H/ACA ribonucleoprotein complex subunit 2 [OS=Homo sapiens]                                    | 25.6          | 41           | 3          | 26     | 3                 | 257                     | 36                              | 3                                            | 3                                        | 0                | 5.79.E+07          | 5.67.E+07          | 3.53.E+07          | 5.15.E+07          | 3.52.E+07              | 3.88.E+07              | 4.54.E+07              | 3.54.E+07              |
| 1343 | Q9Y6G9    | Cytoplasmic dynein 1 light intermediate chain 1 [OS=Homo sapiens]                              | 25.6          | 16           | 4          | 116    | 4                 | 1463                    | 122                             | 4                                            | 4                                        | 0                | 5.86.E+07          | 5.61.E+07          | 5.93.E+07          | 5.58.E+07          | 5.62.E+07              | 6.30.E+07              | 7.18.E+07              | 8.10.E+07              |
| 1344 | Q9Y295    | developmentally-regulated GTP-binding protein 1 [OS=Homo sapiens]                              | 25.5          | 22           | 5          | 70     | 5                 | 802                     | 64                              | 5                                            | 5                                        | 0                | 4.30.E+07          | 4.82.E+07          | 4.20.E+07          | 4.64.E+07          | 7.18.E+07              | 7.00.E+07              | 6.37.E+07              | 7.17.E+07              |
| 1345 | Q92974    | Rho guanine nucleotide exchange factor 2 [OS=Homo sapiens]                                     | 25.5          | 6            | 4          | 68     | 4                 | 1013                    | 35                              | 4                                            | 4                                        | 0                | 1.77.E+07          | 1.55.E+07          | 1.91.E+07          | 3.05.E+07          | 1.49.E+07              | 1.20.E+07              | 1.01.E+07              | 1.38.E+07              |
| 1346 | Q92979    | Ribosomal RNA small subunit methyltransferase Nep1 [OS=Homo sapiens]                           | 25.5          | 26           | 4          | 66     | 4                 | 308                     | 47                              | 3                                            | 4                                        | 0                | 5.44.E+07          | 7.57.E+07          | 7.35.E+07          | 6.79.E+07          | 6.04.E+07              | 5.84.E+07              | 5.27.E+07              | 5.70.E+07              |
| 1347 | P37108    | Signal recognition particle 14 kDa protein [OS=Homo sapiens]                                   | 25.5          | 20           | 2          | 90     | 2                 | 2788                    | 38                              | 1                                            | 2                                        | 0                | 1.64.E+08          | 1.82.E+08          | 1.63.E+08          | 1.98.E+08          | 2.72.E+08              | 2.83.E+08              | 2.52.E+08              | 2.67.E+08              |
| 1348 | Q13510    | Acid ceramidase [OS=Homo sapiens]                                                              | 25.4          | 12           | 3          | 105    | 3                 | 808                     | 105                             | 3                                            | 3                                        | 0                | 1.14.E+08          | 1.20.E+08          | 1.15.E+08          | 1.09.E+08          | 1.35.E+08              | 1.49.E+08              | 1.31.E+08              | 1.41.E+08              |
| 1349 | P23193    | Transcription elongation factor A protein 1 [OS=Homo sapiens]                                  | 25.4          | 25           | 5          | 59     | 5                 | 1107                    | 66                              | 5                                            | 5                                        | 0                | 9.94.E+07          | 6.24.E+07          | 9.62.E+07          | 1.01.E+08          | 4.96.E+07              | 4.09.E+07              | 4.96.E+07              | 4.28.E+07              |
| 1350 | P19623    | spermidine synthase [OS=Homo sapiens]                                                          | 25.4          | 23           | 4          | 121    | 4                 | 1618                    | 192                             | 4                                            | 4                                        | 0                | 1.28.E+08          | 1.49.E+08          | 1.26.E+08          | 1.31.E+08          | 9.08.E+07              | 8.94.E+07              | 8.43.E+07              | 9.39.E+07              |
| 1351 | P30049    | ATP synthase subunit delta, mitochondrial [OS=Homo sapiens]                                    | 25.4          | 38           | 3          | 128    | 3                 | 428                     | 195                             | 3                                            | 3                                        | 0                | 1.72.E+08          | 1.64.E+08          | 1.63.E+08          | 1.79.E+08          | 1.71.E+08              | 1.65.E+08              | 1.78.E+08              | 1.58.E+08              |
| 1352 | P61513    | 60S ribosomal protein L37a [OS=Homo sapiens]                                                   | 25.4          | 41           | 3          | 126    | 3                 | 3291                    | 200                             | 3                                            | 3                                        | 0                | 1.44.E+08          | 1.43.E+08          | 1.45.E+08          | 1.55.E+08          | 1.13.E+08              | 1.22.E+08              | 1.18.E+08              | 1.17.E+08              |
| 1353 | Q13685    | angio-associated migratory cell protein [OS=Homo sapiens]                                      | 25.4          | 10           | 3          | 48     | 3                 | 681                     | 36                              | 3                                            | 3                                        | 0                | 3.14.E+07          | 3.32.E+07          | 3.34.E+07          | 3.33.E+07          | 3.12.E+07              | 3.35.E+07              | 3.80.E+07              | 3.55.E+07              |
| 1354 | Q9NX58    | Cell growth-regulating nucleolar protein [OS=Homo sapiens]                                     | 25.4          | 15           | 3          | 17     | 3                 | 290                     | 26                              | 3                                            | 2                                        | 0                | 2.42.E+07          | 1.76.E+07          | 2.51.E+07          | 1.98.E+07          | 2.31.E+07              | 2.17.E+07              | 1.86.E+07              | 2.46.E+07              |
| 1355 | P21912    | Succinate dehydrogenase [ubiquinone] iron-sulfur subunit, mitochondrial [OS=Homo sapiens]      | 25.3          | 20           | 5          | 86     | 5                 | 749                     | 98                              | 5                                            | 5                                        | 0                | 2.92.E+08          | 2.93.E+08          | 2.80.E+08          | 2.81.E+08          | 3.19.E+08              | 3.15.E+08              | 3.20.E+08              | 3.05.E+08              |
| 1356 | Q9C0D9    | Ethanolaminephosphotransferase 1 [OS=Homo sapiens]                                             | 25.3          | 14           | 3          | 60     | 3                 | 1144                    | 12                              | 2                                            | 3                                        | 0                | 8.88.E+07          | 9.86.E+07          | 8.99.E+07          | 9.56.E+07          | 9.75.E+07              | 9.50.E+07              | 6.06.E+07              | 8.69.E+07              |
| 1357 | P16278    | Beta-galactosidase [OS=Homo sapiens]                                                           | 25.3          | 13           | 5          | 64     | 5                 | 307                     | 32                              | 5                                            | 5                                        | 0                | 4.79.E+07          | 5.24.E+07          | 5.36.E+07          | 5.14.E+07          | 6.01.E+07              | 6.27.E+07              | 6.08.E+07              | 6.49.E+07              |
| 1358 | Q9BQ39    | ATP-dependent RNA helicase DDX50 [OS=Homo sapiens]                                             | 25.2          | 10           | 4          | 102    | 2                 | 1534                    | 160                             | 4                                            | 4                                        | 0                | 1.40.E+07          | 1.84.E+07          | 1.29.E+07          | 2.98.E+07          | 3.42.E+07              | 3.13.E+07              | 2.60.E+07              | 2.87.E+07              |
| 1359 | Q9HCY8    | protein S100-A14 [OS=Homo sapiens]                                                             | 25.2          | 29           | 2          | 36     | 2                 | 706                     | 55                              | 2                                            | 2                                        | 0                | 1.80.E+08          | 1.70.E+08          | 1.67.E+08          | 1.66.E+08          | 1.17.E+08              | 1.25.E+08              | 1.13.E+08              | 1.11.E+08              |
| 1360 | Q96A33-1  | Coiled-coil domain-containing protein 47 [OS=Homo sapiens]                                     | 25.2          | 9            | 3          | 52     | 3                 | 355                     | 51                              | 3                                            | 3                                        | 0                | 1.16.E+08          | 9.08.E+07          | 1.24.E+08          | 1.43.E+08          | 1.12.E+08              | 1.28.E+08              | 1.35.E+08              | 1.09.E+08              |
| 1361 | Q9GZZ1-1  | N-alpha-acetyltransferase 50 [OS=Homo sapiens]                                                 | 25.2          | 37           | 5          | 34     | 5                 | 128                     | 38                              | 5                                            | 4                                        | 0                | 7.27.E+07          | 8.30.E+07          | 8.49.E+07          | 8.28.E+07          | 9.46.E+07              | 8.48.E+07              | 9.10.E+07              | 9.07.E+07              |
| 1362 | P63167    | Dynein light chain 1, cytoplasmic [OS=Homo sapiens]                                            | 25.1          | 21           | 3          | 204    | 3                 | 1645                    | 252                             | 3                                            | 2                                        | 0                | 3.92.E+08          | 3.51.E+08          | 4.02.E+08          | 3.05.E+08          | 3.32.E+08              | 3.97.E+08              | 4.07.E+08              | 3.73.E+08              |
| 1363 | O96005-1  | Cleft lip and palate transmembrane protein 1 [OS=Homo sapiens]                                 | 25.1          | 10           | 3          | 44     | 3                 | 322                     | 44                              | 3                                            | 3                                        | 0                | 1.86.E+07          | 3.06.E+07          | 2.62.E+07          | 2.52.E+07          | 2.73.E+07              | 2.26.E+07              | 2.98.E+07              | 3.35.E+07              |
| 1364 | Q9UXX7    | Nuclear pore complex protein Nup50 [OS=Homo sapiens]                                           | 25.0          | 16           | 4          | 41     | 4                 | 530                     | 56                              | 4                                            | 4                                        | 0                | 3.65.E+07          | 3.98.E+07          | 3.31.E+07          | 3.82.E+07          | 7.63.E+07              | 6.14.E+07              | 5.47.E+07              | 5.74.E+07              |
| 1365 | Q9BY44-1  | Eukaryotic translation initiation factor 2A [OS=Homo sapiens]                                  | 25.0          | 13           | 5          | 72     | 5                 | 262                     | 55                              | 5                                            | 5                                        | 0                | 5.26.E+07          | 5.24.E+07          | 4.94.E+07          | 4.81.E+07          | 5.40.E+07              | 5.43.E+07              | 5.38.E+07              | 5.65.E+07              |
| 1366 | P35244    | Replication protein A 14 kDa subunit [OS=Homo sapiens]                                         | 24.9          | 30           | 2          | 120    | 2                 | 1296                    | 200                             | 2                                            | 2                                        | 0                | 6.95.E+07          | 6.98.E+07          | 4.51.E+07          | 7.83.E+07          | 7.49.E+07              | 8.52.E+07              | 6.07.E+07              | 9.16.E+07              |
| 1367 | O75608    | Acyl-protein thioesterase 1 [OS=Homo sapiens]                                                  | 24.9          | 27           | 3          | 79     | 3                 | 1084                    | 94                              | 2                                            | 3                                        | 0                | 3.40.E+07          | 6.02.E+07          | 2.17.E+07          | 5.76.E+07          | 5.56.E+07              | 4.83.E+07              | 3.99.E+07              | 4.57.E+07              |
| 1368 | O43504    | Regulator complex protein LAMTOR5 [OS=Homo sapiens]                                            | 24.8          | 59           | 2          | 16     | 2                 | 223                     | 30                              | 2                                            | 2                                        | 0                | 5.51.E+07          | 5.67.E+07          | 5.43.E+07          | 1.15.E+07          | 4.88.E+07              | 5.61.E+07              | 4.75.E+07              | 5.20.E+07              |
| 1369 | P26885    | Peptidyl-prolyl cis-trans isomerase FKBP2 [OS=Homo sapiens]                                    | 24.8          | 39           | 3          | 62     | 3                 | 364                     | 71                              | 3                                            | 3                                        | 0                | 9.36.E+07          | 8.67.E+07          | 9.32.E+07          | 9.06.E+07          | 1.20.E+08              | 1.16.E+08              | 1.06.E+08              | 1.18.E+08              |
| 1370 | Q02818    | Nucleobindin-1 [OS=Homo sapiens]                                                               | 24.8          | 13           | 5          | 73     | 5                 | 580                     | 70                              | 5                                            | 5                                        | 0                | 5.70.E+07          | 5.11.E+07          | 6.20.E+07          | 6.20.E+07          | 5.45.E+07              | 5.09.E+07              | 2.99.E+07              | 3.52.E+07              |
| 1371 | Q09161    | Nuclear cap-binding protein subunit 1 [OS=Homo sapiens]                                        | 24.8          | 12           | 6          | 47     | 6                 | 222                     | 23                              | 6                                            | 5                                        | 0                | 3.73.E+07          | 4.14.E+07          | 4.45.E+07          | 3.77.E+07          | 5.36.E+07              | 5.78.E+07              | 5.69.E+07              | 5.95.E+07              |
| 1372 | Q86U42-1  | polyadenylate-binding protein 2 [OS=Homo sapiens]                                              | 24.7          | 13           | 2          | 90     | 2                 | 1152                    | 148                             | 2                                            | 2                                        | 0                | 1.15.E+08          | 1.31.E+08          | 1.23.E+08          | 1.18.E+08          | 2.05.E+08              | 1.53.E+08              | 1.53.E+08              | 1.69.E+08              |
| 1373 | Q15021    | condensin complex subunit 1 [OS=Homo sapiens]                                                  | 24.7          | 5            | 5          | 65     | 5                 | 683                     | 45                              | 5                                            | 5                                        | 0                | 3.96.E+07          | 4.48.E+07          | 3.53.E+07          | 3.77.E+07          | 6.34.E+07              | 7.05.E+07              | 5.06.E+07              | 7.48.E+07              |
| 1374 | O60762    | Dolichol-phosphate mannosyltransferase subunit 1 [OS=Homo sapiens]                             | 24.7          | 19           | 3          | 90     | 3                 | 592                     | 140                             | 3                                            | 3                                        | 0                | 5.91.E+07          | 6.07.E+07          | 5.32.E+07          | 5.98.E+07          | 9.52.E+07              | 9.64.E+07              | 8.59.E+07              | 9.43.E+07              |
| 1375 | Q8NFU3-1  | Thiosulfate sulfurtransferase/rhodanese-like domain-containing protein 1 [OS=Homo sapiens]     | 24.6          | 55           | 3          | 83     | 3                 | 1060                    | 168                             | 2                                            | 3                                        | 0                | 1.19.E+08          | 1.15.E+08          | 1.06.E+08          | 1.22.E+08          | 9.90.E+07              | 9.13.E+07              | 9.66.E+07              | 1.11.E+08              |

| No.  | Accession | Description                                                                        | Sum PEP Score | Coverage [%] | # Peptides | # PSMs | # Unique Peptides | Score Mascot: A5 Mascot | Score Sequest HT: A2 Sequest HT | # Peptides (by Search Engine): A2 Sequest HT | # Peptides (by Search Engine): A5 Mascot | # Razor Peptides | ctrl Abundance s_1 | ctrl Abundance s_2 | ctrl Abundance s_3 | ctrl Abundance s_4 | JAM-A KO Abundance s_1 | JAM-A KO Abundance s_2 | JAM-A KO Abundance s_3 | JAM-A KO Abundance s_4 |
|------|-----------|------------------------------------------------------------------------------------|---------------|--------------|------------|--------|-------------------|-------------------------|---------------------------------|----------------------------------------------|------------------------------------------|------------------|--------------------|--------------------|--------------------|--------------------|------------------------|------------------------|------------------------|------------------------|
| 1376 | Q56VL3    | OCIA domain-containing protein 2 [OS=Homo sapiens]                                 | 24.6          | 21           | 3          | 198    | 3                 | 2120                    | 195                             | 3                                            | 3                                        | 0                | 8.90.E+07          | 9.72.E+07          | 9.12.E+07          | 9.54.E+07          | 9.75.E+07              | 9.76.E+07              | 9.46.E+07              | 9.61.E+07              |
| 1377 | P11137    | microtubule-associated protein 2 [OS=Homo sapiens]                                 | 24.6          | 5            | 5          | 44     | 5                 | 146                     | 29                              | 5                                            | 4                                        | 0                | 5.43.E+07          | 5.04.E+07          | 5.43.E+07          | 4.94.E+07          | 6.09.E+07              | 5.14.E+07              | 9.91.E+07              | 9.26.E+07              |
| 1378 | P00403    | Cytochrome c oxidase subunit 2 [OS=Homo sapiens]                                   | 24.5          | 37           | 4          | 210    | 4                 | 1746                    | 178                             | 4                                            | 4                                        | 0                | 3.08.E+08          | 3.09.E+08          | 2.94.E+08          | 2.97.E+08          | 2.50.E+08              | 2.61.E+08              | 2.59.E+08              | 2.53.E+08              |
| 1379 | O14672    | Disintegrin and metalloproteinase domain-containing protein 10 [OS=Homo sapiens]   | 24.5          | 7            | 4          | 39     | 4                 | 195                     | 43                              | 4                                            | 4                                        | 0                | 1.33.E+08          | 1.25.E+08          | 6.97.E+07          | 1.22.E+08          | 1.12.E+08              | 1.21.E+08              | 1.16.E+08              | 1.27.E+08              |
| 1380 | P52701    | DNA mismatch repair protein MSH6 [OS=Homo sapiens]                                 | 24.5          | 6            | 5          | 78     | 5                 | 1255                    | 72                              | 5                                            | 4                                        | 0                | 4.92.E+07          | 5.21.E+07          | 4.87.E+07          | 4.82.E+07          | 5.01.E+07              | 3.91.E+07              | 3.85.E+07              | 4.40.E+07              |
| 1381 | P47985    | cytochrome b-c1 complex subunit Rieske, mitochondrial [OS=Homo sapiens]            | 24.4          | 25           | 3          | 71     | 1                 | 624                     | 80                              | 3                                            | 2                                        | 0                |                    |                    | 1.70.E+07          |                    | 1.63.E+07              | 1.91.E+07              |                        |                        |
| 1382 | Q01085    | Nucleolysin TIAR [OS=Homo sapiens]                                                 | 24.4          | 14           | 4          | 31     | 2                 | 130                     | 24                              | 4                                            | 4                                        | 2                | 7.87.E+07          | 7.25.E+07          | 6.78.E+07          | 8.38.E+07          | 7.07.E+07              | 7.95.E+07              | 8.39.E+07              | 7.54.E+07              |
| 1383 | O00541-1  | Pescadillo homolog [OS=Homo sapiens]                                               | 24.4          | 13           | 5          | 92     | 5                 | 388                     | 62                              | 5                                            | 5                                        | 0                | 1.61.E+08          | 1.61.E+08          | 1.58.E+08          | 1.63.E+08          | 1.40.E+08              | 1.43.E+08              | 1.65.E+08              | 1.30.E+08              |
| 1384 | Q9NTI5    | Sister chromatid cohesion protein PDS5 homolog B [OS=Homo sapiens]                 | 24.3          | 5            | 3          | 50     | 3                 | 487                     | 7                               | 3                                            | 3                                        | 0                | 1.37.E+07          | 1.36.E+07          | 1.30.E+07          | 1.27.E+07          | 2.49.E+07              | 2.17.E+07              | 2.15.E+07              | 2.32.E+07              |
| 1385 | P30519    | Heme oxygenase 2 [OS=Homo sapiens]                                                 | 24.3          | 25           | 4          | 17     | 4                 | 211                     | 28                              | 3                                            | 4                                        | 0                | 6.47.E+07          | 6.81.E+07          | 5.77.E+07          | 4.28.E+07          | 5.81.E+07              | 5.73.E+07              | 3.85.E+07              | 5.97.E+07              |
| 1386 | Q04206    | Transcription factor p65 [OS=Homo sapiens]                                         | 24.1          | 10           | 4          | 10     | 4                 | 147                     | 13                              | 4                                            | 4                                        | 0                | 7.38.E+07          | 7.75.E+07          | 6.49.E+07          | 5.85.E+07          | 7.33.E+07              | 7.83.E+07              | 8.04.E+07              | 8.08.E+07              |
| 1387 | Q9UKM9-1  | RNA-binding protein Raly [OS=Homo sapiens]                                         | 24.1          | 13           | 4          | 64     | 4                 | 469                     | 49                              | 4                                            | 4                                        | 0                | 1.97.E+08          | 1.96.E+08          | 2.01.E+08          | 1.94.E+08          | 1.72.E+08              | 1.76.E+08              | 1.83.E+08              | 1.78.E+08              |
| 1388 | Q96AB3    | isochorismatase domain-containing protein 2 [OS=Homo sapiens]                      | 24.0          | 31           | 3          | 128    | 3                 | 1462                    | 115                             | 3                                            | 3                                        | 0                | 4.82.E+07          | 5.14.E+07          | 4.35.E+07          | 4.46.E+07          | 3.35.E+07              | 3.00.E+07              | 2.60.E+07              | 3.05.E+07              |
| 1389 | Q9UNH7-1  | Sorting nexin-6 [OS=Homo sapiens]                                                  | 24.0          | 10           | 2          | 32     | 2                 | 695                     | 27                              | 2                                            | 2                                        | 0                | 1.38.E+07          | 1.54.E+07          | 1.59.E+07          | 1.78.E+07          | 3.13.E+07              | 2.52.E+07              | 3.08.E+07              | 3.14.E+07              |
| 1390 | Q969V3    | Nicalin [OS=Homo sapiens]                                                          | 24.0          | 11           | 4          | 26     | 4                 | 90                      | 25                              | 4                                            | 4                                        | 0                | 3.82.E+07          | 4.50.E+07          | 4.20.E+07          | 4.71.E+07          | 1.95.E+07              | 5.71.E+07              | 3.74.E+07              | 1.72.E+07              |
| 1391 | P51116    | Fragile X mental retardation syndrome-related protein 2 [OS=Homo sapiens]          | 24.0          | 8            | 4          | 22     | 4                 | 239                     | 24                              | 4                                            | 4                                        | 0                | 6.18.E+07          | 6.46.E+07          | 7.61.E+07          | 6.60.E+07          | 4.59.E+07              | 2.27.E+07              | 4.09.E+07              | 2.54.E+07              |
| 1392 | Q12792-2  | Twinfilin-1 [OS=Homo sapiens]                                                      | 23.9          | 11           | 2          | 27     | 2                 | 1225                    | 49                              | 1                                            | 2                                        | 0                | 2.63.E+07          | 3.77.E+07          | 3.46.E+07          | 3.40.E+07          | 3.32.E+07              | 4.64.E+07              | 4.43.E+07              | 2.08.E+07              |
| 1393 | P09496-2  | Isoform Non-brain of Clathrin light chain A [OS=Homo sapiens]                      | 23.9          | 21           | 5          | 49     | 5                 | 161                     | 161                             | 5                                            | 0                                        | 2.11.E+08        | 2.14.E+08          | 2.14.E+08          | 2.05.E+08          | 4.65.E+08          | 4.61.E+08              | 4.85.E+08              | 4.94.E+08              |                        |
| 1394 | O75475-1  | PC4 and SFRS1-interacting protein [OS=Homo sapiens]                                | 23.9          | 7            | 3          | 85     | 3                 | 364                     | 32                              | 3                                            | 3                                        | 0                | 4.86.E+07          | 5.64.E+07          | 5.57.E+07          | 5.04.E+07          | 8.12.E+07              | 8.88.E+07              | 7.80.E+07              | 6.36.E+07              |
| 1395 | P45973    | chromobox protein homolog 5 [OS=Homo sapiens]                                      | 23.8          | 21           | 3          | 100    | 2                 | 1275                    | 147                             | 3                                            | 3                                        | 0                | 4.86.E+07          | 4.56.E+07          | 4.13.E+07          | 3.97.E+07          | 1.70.E+07              | 4.48.E+07              | 3.96.E+07              | 1.74.E+07              |
| 1396 | Q15404-1  | Ras suppressor protein 1 [OS=Homo sapiens]                                         | 23.7          | 21           | 3          | 26     | 3                 | 316                     | 28                              | 3                                            | 3                                        | 0                | 3.33.E+07          | 2.60.E+07          | 3.46.E+07          | 3.56.E+07          | 5.41.E+07              | 4.45.E+07              | 4.29.E+07              | 4.80.E+07              |
| 1397 | P60983    | glia maturation factor beta [OS=Homo sapiens]                                      | 23.6          | 27           | 2          | 15     | 2                 | 88                      | 21                              | 1                                            | 2                                        | 0                | 8.84.E+06          | 8.34.E+06          | 7.31.E+06          | 6.77.E+06          | 1.40.E+07              | 1.72.E+07              | 1.08.E+07              | 1.62.E+07              |
| 1398 | P04179    | Superoxide dismutase [Mn], mitochondrial [OS=Homo sapiens]                         | 23.5          | 40           | 4          | 24     | 4                 |                         | 67                              | 4                                            |                                          | 0                | 1.09.E+08          | 7.68.E+07          | 1.26.E+08          | 1.24.E+08          | 1.15.E+08              | 1.06.E+08              | 1.14.E+08              | 1.18.E+08              |
| 1399 | Q96G03    | Phosphoglucomutase-2 [OS=Homo sapiens]                                             | 23.5          | 9            | 3          | 112    | 2                 | 881                     | 99                              | 3                                            | 2                                        | 0                | 1.45.E+07          | 4.76.E+07          | 4.74.E+07          | 1.64.E+07          | 5.87.E+07              | 5.54.E+07              | 4.73.E+07              | 5.41.E+07              |
| 1400 | P10606    | Cytochrome c oxidase subunit 5B, mitochondrial [OS=Homo sapiens]                   | 23.4          | 30           | 4          | 172    | 4                 | 1418                    | 206                             | 4                                            | 4                                        | 0                | 3.23.E+08          | 3.00.E+08          | 3.28.E+08          | 3.36.E+08          | 2.71.E+08              | 2.84.E+08              | 3.36.E+08              | 3.10.E+08              |
| 1401 | Q99627-1  | COP9 signalosome complex subunit 8 [OS=Homo sapiens]                               | 23.4          | 33           | 3          | 51     | 3                 | 333                     | 60                              | 3                                            | 3                                        | 0                | 2.87.E+07          | 3.38.E+07          | 3.76.E+07          | 3.35.E+07          | 3.30.E+07              | 4.16.E+07              | 3.51.E+07              | 3.27.E+07              |
| 1402 | P31483    | nucleolysin TIA-1 isoform p40 [OS=Homo sapiens]                                    | 23.3          | 11           | 3          | 64     | 1                 | 529                     | 32                              | 3                                            | 3                                        | 0                | 5.55.E+06          | 1.39.E+07          | 1.33.E+07          | 1.42.E+07          | 8.89.E+06              | 5.02.E+06              | 5.97.E+06              | 8.84.E+06              |
| 1403 | Q9UBV8    | Peflin [OS=Homo sapiens]                                                           | 23.3          | 17           | 2          | 40     | 2                 | 962                     | 30                              | 2                                            | 2                                        | 0                | 9.99.E+06          | 1.09.E+07          | 9.91.E+06          | 1.03.E+07          | 9.56.E+06              | 8.00.E+06              | 7.07.E+06              | 6.57.E+06              |
| 1404 | Q14232    | Translation initiation factor eIF-2B subunit alpha [OS=Homo sapiens]               | 23.3          | 18           | 4          | 53     | 4                 | 533                     | 48                              | 4                                            | 4                                        | 0                | 4.19.E+07          | 4.40.E+07          | 4.55.E+07          | 4.51.E+07          | 5.42.E+07              | 5.24.E+07              | 5.13.E+07              | 4.90.E+07              |
| 1405 | Q9BW27    | nuclear pore complex protein Nup85 [OS=Homo sapiens]                               | 23.2          | 4            | 2          | 52     | 2                 | 600                     | 44                              | 2                                            | 2                                        | 0                | 2.00.E+07          | 2.02.E+07          | 1.72.E+07          | 2.13.E+07          | 1.62.E+07              | 1.45.E+07              | 1.28.E+07              | 1.45.E+07              |
| 1406 | Q14019    | coactosin-like protein [OS=Homo sapiens]                                           | 23.2          | 32           | 2          | 74     | 2                 | 1171                    | 90                              | 2                                            | 2                                        | 0                | 3.18.E+07          | 3.50.E+07          | 2.92.E+07          | 3.90.E+07          | 6.96.E+07              | 7.37.E+07              | 6.39.E+07              | 7.35.E+07              |
| 1407 | Q9NPF4    | Probable tRNA N6-adenosine threonylcarbamoyltransferase [OS=Homo sapiens]          | 23.1          | 14           | 2          | 16     | 2                 | 488                     | 25                              | 2                                            | 2                                        | 0                | 1.15.E+07          | 4.25.E+06          | 1.06.E+07          | 1.00.E+07          | 1.05.E+05              |                        | 5.68.E+05              | 1.18.E+05              |
| 1408 | Q9C0C9    | (E3-independent) E2 ubiquitin-conjugating enzyme [OS=Homo sapiens]                 | 23.1          | 5            | 3          | 12     | 3                 | 108                     | 15                              | 3                                            | 3                                        | 0                | 3.53.E+07          | 3.33.E+07          | 2.94.E+07          | 2.13.E+07          | 3.14.E+07              | 3.05.E+07              | 2.36.E+07              | 2.74.E+07              |
| 1409 | P54619-1  | 5'-AMP-activated protein kinase subunit gamma-1 [OS=Homo sapiens]                  | 23.1          | 15           | 2          | 68     | 2                 | 1513                    | 75                              | 2                                            | 2                                        | 0                | 1.39.E+07          | 1.58.E+07          | 1.65.E+07          | 1.89.E+07          | 1.69.E+07              | 1.51.E+07              | 1.24.E+07              | 1.57.E+07              |
| 1410 | P48147    | prolyl endopeptidase [OS=Homo sapiens]                                             | 23.1          | 7            | 3          | 46     | 3                 | 905                     | 57                              | 3                                            | 3                                        | 0                | 3.66.E+07          | 3.56.E+07          | 3.84.E+07          | 3.91.E+07          | 3.70.E+07              | 3.22.E+07              | 2.57.E+07              | 3.30.E+07              |
| 1411 | Q14690    | Protein RRP5 homolog [OS=Homo sapiens]                                             | 23.1          | 4            | 6          | 50     | 6                 | 177                     | 17                              | 6                                            | 6                                        | 0                | 1.64.E+08          | 1.70.E+08          | 1.85.E+08          | 1.06.E+08          | 1.18.E+08              | 1.52.E+08              | 1.88.E+08              | 1.13.E+08              |
| 1412 | P19525    | interferon-induced, double-stranded RNA-activated protein kinase [OS=Homo sapiens] | 23.1          | 9            | 4          | 96     | 4                 | 1341                    | 120                             | 4                                            | 4                                        | 0                | 6.07.E+07          | 8.02.E+07          | 7.82.E+07          | 6.44.E+07          | 8.14.E+07              | 8.06.E+07              | 7.88.E+07              | 8.08.E+07              |
| 1413 | Q9Y3T9    | Nucleolar complex protein 2 homolog [OS=Homo sapiens]                              | 23.0          | 7            | 3          | 35     | 3                 | 108                     | 32                              | 3                                            | 3                                        | 0                | 6.34.E+07          | 5.88.E+07          | 6.10.E+07          | 5.89.E+07          | 3.87.E+07              | 5.10.E+07              | 5.21.E+07              | 5.56.E+07              |
| 1414 | P05204    | Non-histone chromosomal protein HMG-17 [OS=Homo sapiens]                           | 23.0          | 17           | 1          | 213    | 1                 | 707                     | 89                              | 1                                            | 1                                        | 0                | 8.16.E+07          | 7.81.E+07          | 8.62.E+07          | 6.41.E+07          | 7.06.E+07              | 8.40.E+07              | 8.21.E+07              | 7.85.E+07              |
| 1415 | O14925    | Mitochondrial import inner membrane translocase subunit tim23 [OS=Homo sapiens]    | 23.0          | 38           | 3          | 75     | 3                 | 836                     | 86                              | 3                                            | 3                                        | 0                | 6.04.E+07          | 6.95.E+07          | 5.90.E+07          | 6.69.E+07          | 2.97.E+07              | 3.03.E+07              | 2.46.E+07              | 3.18.E+07              |
| 1416 | Q92888-1  | Rho guanine nucleotide exchange factor 1 [OS=Homo sapiens]                         | 23.0          | 8            | 5          | 38     | 5                 | 131                     | 25                              | 5                                            | 5                                        | 0                | 2.89.E+07          | 3.24.E+07          | 2.85.E+07          | 2.77.E+07          | 1.48.E+07              | 1.49.E+07              | 1.56.E+07              | 1.24.E+07              |
| 1417 | P46779    | 60S ribosomal protein L28 [OS=Homo sapiens]                                        | 23.0          | 36           | 6          | 201    | 6                 | 1562                    | 80                              | 5                                            | 6                                        | 0                | 7.52.E+08          | 7.08.E+08          | 7.37.E+08          | 7.68.E+08          | 5.47.E+08              | 5.49.E+08              | 5.96.E+08              | 5.50.E+08              |
| 1418 | Q96PZ0    | pseudouridylyl synthase 7 homolog [OS=Homo sapiens]                                | 22.9          | 7            | 2          | 28     | 2                 | 611                     | 29                              | 2                                            | 2                                        | 0                | 1.39.E+07          | 1.14.E+07          | 1.21.E+07          | 1.37.E+07          | 2.30.E+07              | 2.08.E+07              | 1.82.E+07              | 2.37.E+07              |
| 1419 | Q9BRR6-1  | ADP-dependent glucokinase [OS=Homo sapiens]                                        | 22.9          | 16           | 3          | 31     | 3                 | 161                     | 37                              | 3                                            | 3                                        | 0                | 1.94.E+07          | 1.20.E+07          | 1.13.E+07          | 1.21.E+07          | 2.02.E+07              | 1.85.E+07              | 1.60.E+07              | 1.81.E+07              |
| 1420 | POC7P4    | Putative cytochrome b-c1 complex subunit Rieske-like protein 1 [OS=Homo sapiens]   | 22.9          | 22           | 3          | 71     | 1                 | 624                     | 80                              | 3                                            | 2                                        | 2                | 6.61.E+07          | 7.10.E+07          | 6.69.E+07          | 6.65.E+07          | 7.40.E+07              | 7.22.E+07              | 6.24.E+07              | 7.50.E+07              |
| 1421 | O95292    | Vesicle-associated membrane protein-associated protein B/C [OS=Homo sapiens]       | 22.8          | 16           | 3          | 87     | 3                 | 753                     | 108                             | 3                                            | 3                                        | 0                | 8.58.E+07          | 8.94.E+07          | 9.40.E+07          | 7.71.E+07          | 1.08.E+08              | 1.06.E+08              | 1.15.E+08              | 1.10.E+08              |
| 1422 | O75223-1  | gamma-glutamylcyclotransferase [OS=Homo sapiens]                                   | 22.8          | 32           | 4          | 39     | 4                 | 204                     | 39                              | 4                                            | 4                                        | 0                | 1.64.E+08          | 8.34.E+07          | 1.56.E+08          | 1.40.E+08          | 2.20.E+08              | 1.68.E+08              | 1.71.E+08              | 1.67.E+08              |
| 1423 | O95232-1  | Luc7-like protein 3 [OS=Homo sapiens]                                              | 22.8          | 11           | 3          | 66     | 3                 | 1406                    | 76                              | 3                                            | 3                                        | 0                | 3.05.E+07          | 3.54.E+07          | 3.35.E+07          | 3.24.E+07          | 3.55.E+07              | 3.62.E+07              | 3.33.E+07              | 3.83.E+07              |
| 1424 | P52943    | Cysteine-rich protein 2 [OS=Homo sapiens]                                          | 22.8          | 32           | 3          | 32     | 3                 | 512                     | 47                              | 3                                            | 3                                        | 0                | 4.64.E+07          | 4.90.E+07          | 4.23.E+07          | 4.75.E+07          | 3.10.E+07              | 2.95.E+07              | 2.75.E+07              | 2.97.E+07              |
| 1425 | Q5H9R7-1  | Serine/threonine-protein phosphatase 6 regulatory subunit 3 [OS=Homo sapiens]      | 22.7          | 5            | 3          | 74     | 3                 | 1090                    | 82                              | 3                                            | 3                                        | 0                | 2.35.E+07          | 2.18.E+07          | 2.32.E+07          | 2.80.E+07          | 3.56.E+07              | 3.58.E+07              | 6.79.E+07              | 2.44.E+07              |

| No.  | Accession | Description                                                                            | Sum PEP Score | Coverage [%] | # Peptides | # PSMs | # Unique Peptides | Score Mascot: A5 Mascot | Score Sequest HT: A2 Sequest HT | # Peptides (by Search Engine): A2 Sequest HT | # Peptides (by Search Engine): A5 Mascot | # Razor Peptides | ctrl Abundance s_1 | ctrl Abundance s_2 | ctrl Abundance s_3 | ctrl Abundance s_4 | JAM-A KO Abundance s_1 | JAM-A KO Abundance s_2 | JAM-A KO Abundance s_3 | JAM-A KO Abundance s_4 |
|------|-----------|----------------------------------------------------------------------------------------|---------------|--------------|------------|--------|-------------------|-------------------------|---------------------------------|----------------------------------------------|------------------------------------------|------------------|--------------------|--------------------|--------------------|--------------------|------------------------|------------------------|------------------------|------------------------|
| 1426 | Q9BW72    | HIG1 domain family member 2A, mitochondrial [OS=Homo sapiens]                          | 22.7          | 51           | 2          | 70     | 2                 | 1327                    | 144                             | 1                                            | 2                                        | 0                | 6.71.E+07          | 7.78.E+07          | 6.74.E+07          | 7.86.E+07          | 8.40.E+07              | 7.65.E+07              | 6.78.E+07              | 8.03.E+07              |
| 1427 | Q6ZNJ1-1  | Neurobeachin-like protein 2 [OS=Homo sapiens]                                          | 22.6          | 2            | 3          | 60     | 3                 | 896                     | 79                              | 3                                            | 3                                        | 0                | 2.08.E+07          | 1.81.E+07          | 1.72.E+07          | 1.88.E+07          | 1.11.E+07              | 6.85.E+06              | 8.56.E+06              | 1.07.E+07              |
| 1428 | Q9HDC9    | Adipocyte plasma membrane-associated protein [OS=Homo sapiens]                         | 22.6          | 21           | 4          | 58     | 4                 | 265                     | 55                              | 4                                            | 4                                        | 0                | 7.87.E+07          | 7.68.E+07          | 7.08.E+07          | 4.98.E+07          | 8.18.E+07              | 1.03.E+08              | 1.05.E+08              | 1.08.E+08              |
| 1429 | P40763    | Signal transducer and activator of transcription 3 [OS=Homo sapiens]                   | 22.6          | 16           | 6          | 65     | 5                 | 326                     | 24                              | 6                                            | 5                                        | 1                | 5.41.E+07          | 5.76.E+07          | 5.38.E+07          | 5.36.E+07          | 6.61.E+07              | 6.76.E+07              | 6.52.E+07              | 6.84.E+07              |
| 1430 | Q9NYL4    | Peptidyl-prolyl cis-trans isomerase FKBP11 [OS=Homo sapiens]                           | 22.5          | 27           | 2          | 46     | 2                 | 99                      | 73                              | 2                                            | 2                                        | 0                | 6.00.E+07          | 9.98.E+07          | 7.54.E+07          | 6.46.E+07          | 1.02.E+08              | 1.30.E+08              | 1.08.E+08              | 8.35.E+07              |
| 1431 | Q9BXY0    | Protein MAK16 homolog [OS=Homo sapiens]                                                | 22.5          | 11           | 3          | 26     | 3                 | 313                     | 23                              | 3                                            | 3                                        | 0                | 1.42.E+07          | 1.58.E+07          | 4.55.E+06          | 5.94.E+06          | 3.65.E+06              | 1.46.E+07              | 1.00.E+07              | 1.47.E+07              |
| 1432 | P38405    | Guanine nucleotide-binding protein G(olf) subunit alpha [OS=Homo sapiens]              | 22.5          | 14           | 3          | 47     | 1                 | 638                     | 60                              | 2                                            | 3                                        | 0                |                    |                    |                    |                    |                        |                        |                        |                        |
| 1433 | Q9H9Q2    | COP9 signalosome complex subunit 7b [OS=Homo sapiens]                                  | 22.5          | 20           | 3          | 30     | 3                 | 299                     | 15                              | 2                                            | 3                                        | 0                | 3.20.E+07          | 3.20.E+07          | 3.33.E+07          | 3.47.E+07          | 4.38.E+07              | 3.79.E+07              | 4.15.E+07              | 4.20.E+07              |
| 1434 | Q9BPP5    | actin-related protein 2/3 complex subunit 5-like protein [OS=Homo sapiens]             | 22.5          | 33           | 2          | 24     | 2                 | 283                     | 40                              | 2                                            | 2                                        | 0                | 6.23.E+07          | 7.01.E+07          | 6.47.E+07          | 6.40.E+07          | 5.71.E+07              | 6.20.E+07              | 5.54.E+07              | 4.43.E+07              |
| 1435 | Q92544    | Transmembrane 9 superfamily member 4 [OS=Homo sapiens]                                 | 22.5          | 12           | 5          | 49     | 5                 | 640                     | 64                              | 5                                            | 4                                        | 0                | 3.42.E+08          | 3.22.E+08          | 3.40.E+08          | 2.62.E+08          | 5.86.E+08              | 5.34.E+08              | 5.14.E+08              | 5.46.E+08              |
| 1436 | Q14683    | structural maintenance of chromosomes protein 1a [OS=Homo sapiens]                     | 22.5          | 6            | 5          | 64     | 5                 | 894                     | 45                              | 4                                            | 5                                        | 0                | 3.29.E+07          | 3.65.E+07          | 3.52.E+07          | 3.44.E+07          | 3.65.E+07              | 3.87.E+07              | 3.05.E+07              | 3.80.E+07              |
| 1437 | Q15418-1  | Ribosomal protein S6 kinase alpha-1 [OS=Homo sapiens]                                  | 22.4          | 9            | 5          | 49     | 2                 | 276                     | 60                              | 5                                            | 4                                        | 0                | 1.16.E+07          | 1.13.E+07          | 1.34.E+07          | 9.94.E+06          | 1.67.E+07              | 1.57.E+07              | 1.36.E+07              | 1.41.E+07              |
| 1438 | P13073    | Cytochrome c oxidase subunit 4 isoform 1, mitochondrial [OS=Homo sapiens]              | 22.3          | 20           | 4          | 178    | 4                 | 685                     | 222                             | 4                                            | 4                                        | 0                | 3.41.E+08          | 3.31.E+08          | 3.53.E+08          | 3.88.E+08          | 2.94.E+08              | 2.97.E+08              | 3.22.E+08              | 3.03.E+08              |
| 1439 | Q9Y5Z4-1  | Heme-binding protein 2 [OS=Homo sapiens]                                               | 22.3          | 24           | 4          | 36     | 4                 | 199                     | 40                              | 4                                            | 4                                        | 0                | 4.09.E+07          | 5.05.E+07          | 4.14.E+07          | 4.88.E+07          | 6.60.E+07              | 6.37.E+07              | 5.30.E+07              | 6.30.E+07              |
| 1440 | Q9HC38-2  | Isoform 2 of Glyoxalase domain-containing protein 4 [OS=Homo sapiens]                  | 22.3          | 20           | 4          | 21     | 4                 |                         | 35                              | 4                                            |                                          | 0                | 2.18.E+07          | 1.82.E+07          | 2.33.E+07          | 1.63.E+07          | 4.52.E+06              | 8.50.E+06              | 5.68.E+06              | 1.05.E+07              |
| 1441 | Q9NP97    | Dynein light chain roadblock-type 1 [OS=Homo sapiens]                                  | 22.3          | 39           | 3          | 83     | 3                 | 1580                    | 105                             | 2                                            | 3                                        | 0                | 1.69.E+08          | 1.79.E+08          | 1.75.E+08          | 1.76.E+08          | 2.13.E+08              | 2.07.E+08              | 2.01.E+08              | 2.15.E+08              |
| 1442 | P62304    | small nuclear ribonucleoprotein E [OS=Homo sapiens]                                    | 22.2          | 39           | 2          | 132    | 2                 | 2117                    | 160                             | 2                                            | 2                                        | 0                | 1.35.E+08          | 9.68.E+07          | 7.48.E+07          | 1.10.E+08          | 6.61.E+07              | 7.20.E+07              | 7.97.E+07              | 8.53.E+07              |
| 1443 | Q9UM00-1  | Calcium load-activated calcium channel [OS=Homo sapiens]                               | 22.2          | 20           | 3          | 147    | 3                 | 2357                    | 189                             | 3                                            | 3                                        | 0                | 1.24.E+08          | 1.34.E+08          | 1.16.E+08          | 1.23.E+08          | 1.67.E+08              | 1.63.E+08              | 1.67.E+08              | 1.56.E+08              |
| 1444 | Q13740-1  | CD166 antigen [OS=Homo sapiens]                                                        | 22.2          | 15           | 4          | 55     | 4                 | 625                     | 55                              | 4                                            | 4                                        | 0                | 3.46.E+07          | 3.27.E+07          | 1.74.E+07          | 3.16.E+07          | 6.59.E+07              | 7.48.E+07              | 5.68.E+07              | 6.41.E+07              |
| 1445 | O75131    | Copine-3 [OS=Homo sapiens]                                                             | 22.2          | 8            | 3          | 110    | 3                 | 971                     | 143                             | 3                                            | 3                                        | 0                | 8.01.E+07          | 8.44.E+07          | 1.05.E+08          | 8.20.E+07          | 9.57.E+07              | 8.26.E+07              | 8.40.E+07              | 1.10.E+08              |
| 1446 | Q9Y333    | U6 snRNA-associated Sm-like protein LSm2 [OS=Homo sapiens]                             | 22.2          | 40           | 2          | 77     | 2                 | 2221                    | 119                             | 2                                            | 2                                        | 0                | 5.75.E+07          | 6.54.E+07          | 7.03.E+07          | 6.52.E+07          | 1.17.E+08              | 1.10.E+08              | 8.90.E+07              | 1.06.E+08              |
| 1447 | P55145    | Mesencephalic astrocyte-derived neurotrophic factor [OS=Homo sapiens]                  | 22.1          | 29           | 5          | 88     | 5                 | 238                     | 75                              | 5                                            | 4                                        | 0                | 8.90.E+07          | 8.24.E+07          | 9.42.E+07          | 9.31.E+07          | 1.15.E+08              | 1.11.E+08              | 8.14.E+07              | 1.11.E+08              |
| 1448 | O94760-1  | N(G),N(G)-dimethylarginine dimethylaminohydrolase 1 [OS=Homo sapiens]                  | 22.1          | 22           | 5          | 68     | 5                 | 244                     | 39                              | 4                                            | 5                                        | 0                | 1.38.E+08          | 1.47.E+08          | 1.45.E+08          | 1.51.E+08          | 1.26.E+08              | 1.12.E+08              | 1.23.E+08              | 1.17.E+08              |
| 1449 | P52732    | Kinesin-like protein KIF11 [OS=Homo sapiens]                                           | 22.1          | 6            | 3          | 7      | 3                 | 122                     | 6                               | 3                                            | 2                                        | 0                | 2.69.E+07          | 3.25.E+07          | 3.01.E+07          | 3.32.E+07          | 1.57.E+07              | 3.79.E+07              | 1.37.E+07              | 1.38.E+07              |
| 1450 | O43237    | Cytoplasmic dynein 1 light intermediate chain 2 [OS=Homo sapiens]                      | 22.1          | 7            | 2          | 90     | 2                 | 2001                    | 102                             | 2                                            | 2                                        | 0                | 3.62.E+07          | 3.88.E+07          | 3.08.E+07          | 4.04.E+07          | 4.22.E+07              | 3.97.E+07              | 3.69.E+07              | 4.03.E+07              |
| 1451 | O15230    | Laminin subunit alpha-5 [OS=Homo sapiens]                                              | 22.1          | 1            | 2          | 36     | 2                 | 689                     | 55                              | 2                                            | 2                                        | 0                | 1.54.E+07          | 2.04.E+07          | 1.23.E+07          | 1.31.E+07          | 2.85.E+07              | 2.20.E+07              | 1.46.E+07              | 1.74.E+07              |
| 1452 | Q00059    | Transcription factor A, mitochondrial [OS=Homo sapiens]                                | 22.0          | 19           | 4          | 110    | 4                 | 269                     | 72                              | 4                                            | 4                                        | 0                | 1.53.E+08          | 1.42.E+08          | 1.45.E+08          | 1.25.E+08          | 1.36.E+08              | 1.36.E+08              | 1.48.E+08              | 1.45.E+08              |
| 1453 | Q52LJ0    | Protein Fam98b [OS=Homo sapiens]                                                       | 21.9          | 24           | 4          | 24     | 4                 | 303                     | 24                              | 4                                            | 4                                        | 0                | 2.51.E+07          | 3.51.E+07          | 2.02.E+07          | 3.93.E+07          | 3.75.E+07              | 3.10.E+07              | 3.42.E+07              | 4.20.E+07              |
| 1454 | O14737    | Programmed cell death protein 5 [OS=Homo sapiens]                                      | 21.9          | 35           | 5          | 83     | 5                 | 112                     | 34                              | 4                                            | 5                                        | 0                | 2.53.E+08          | 2.84.E+08          | 2.97.E+08          | 2.21.E+08          | 1.49.E+08              | 1.60.E+08              | 2.07.E+08              | 1.96.E+08              |
| 1455 | O00203-1  | AP-3 complex subunit beta-1 [OS=Homo sapiens]                                          | 21.9          | 8            | 6          | 64     | 6                 | 146                     | 24                              | 6                                            | 6                                        | 0                | 1.15.E+08          | 1.18.E+08          | 1.15.E+08          | 1.21.E+08          | 1.32.E+08              | 1.45.E+08              | 1.17.E+08              | 1.32.E+08              |
| 1456 | P30536    | translocator protein [OS=Homo sapiens]                                                 | 21.9          | 14           | 1          | 9      | 1                 | 244                     |                                 |                                              | 1                                        | 0                |                    |                    |                    |                    |                        |                        |                        |                        |
| 1457 | Q9NRW7    | Vacuolar protein sorting-associated protein 45 [OS=Homo sapiens]                       | 21.8          | 8            | 4          | 48     | 4                 | 323                     | 16                              | 4                                            | 4                                        | 0                | 1.67.E+07          | 2.29.E+07          | 1.95.E+07          | 2.85.E+07          | 2.70.E+07              | 2.68.E+07              | 2.04.E+07              | 2.73.E+07              |
| 1458 | P04637    | Cellular tumor antigen p53 [OS=Homo sapiens]                                           | 21.8          | 8            | 2          | 58     | 2                 | 1547                    | 129                             | 2                                            | 2                                        | 0                | 3.46.E+07          | 3.79.E+07          | 2.68.E+07          | 3.71.E+07          | 2.46.E+07              | 2.88.E+07              | 1.89.E+07              | 2.80.E+07              |
| 1459 | P32320    | cytidine deaminase [OS=Homo sapiens]                                                   | 21.8          | 26           | 2          | 36     | 2                 | 949                     | 55                              | 2                                            | 2                                        | 0                | 1.32.E+07          | 7.85.E+06          | 1.64.E+07          | 1.03.E+07          | 3.52.E+07              | 3.44.E+07              | 3.10.E+07              | 2.83.E+07              |
| 1460 | Q9H0C8    | Integrin-linked kinase-associated serine/threonine phosphatase 2C [OS=Homo sapiens]    | 21.8          | 9            | 2          | 97     | 2                 | 2433                    | 114                             | 2                                            | 2                                        | 0                | 4.95.E+07          | 4.96.E+07          | 4.33.E+07          | 5.55.E+07          | 1.41.E+07              | 1.56.E+07              | 3.80.E+07              | 1.17.E+07              |
| 1461 | O75380    | NADH dehydrogenase [ubiquinone] iron-sulfur protein 6, mitochondrial [OS=Homo sapiens] | 21.7          | 33           | 3          | 72     | 3                 | 386                     | 12                              | 3                                            | 3                                        | 0                | 3.70.E+07          | 3.74.E+07          | 3.77.E+07          | 3.42.E+07          | 3.24.E+07              | 3.12.E+07              | 3.35.E+07              | 3.34.E+07              |
| 1462 | Q86TU7    | Histone-lysine N-methyltransferase setd3 [OS=Homo sapiens]                             | 21.7          | 13           | 4          | 46     | 4                 | 443                     | 39                              | 4                                            | 4                                        | 0                | 2.90.E+07          | 2.89.E+07          | 3.04.E+07          | 2.84.E+07          | 1.24.E+07              | 1.38.E+07              | 7.80.E+06              | 1.53.E+07              |
| 1463 | Q9Y5X3    | sorting nexin-5 [OS=Homo sapiens]                                                      | 21.6          | 19           | 4          | 45     | 4                 | 334                     | 25                              | 3                                            | 4                                        | 0                | 5.42.E+07          | 6.50.E+07          | 5.16.E+07          | 5.45.E+07          | 8.63.E+07              | 8.42.E+07              | 7.29.E+07              | 8.26.E+07              |
| 1464 | P11279    | Lysosome-associated membrane glycoprotein 1 [OS=Homo sapiens]                          | 21.6          | 7            | 3          | 30     | 3                 | 423                     | 26                              | 3                                            | 3                                        | 0                | 8.85.E+07          | 8.53.E+07          | 8.73.E+07          | 9.49.E+07          | 1.78.E+08              | 1.45.E+08              | 1.50.E+08              | 1.70.E+08              |
| 1465 | Q7Z7H5    | Transmembrane emp24 domain-containing protein 4 [OS=Homo sapiens]                      | 21.5          | 21           | 3          | 53     | 2                 | 1234                    | 77                              | 3                                            | 2                                        | 0                | 4.67.E+07          | 4.61.E+07          | 3.34.E+07          | 4.78.E+07          | 5.19.E+07              | 5.97.E+07              | 5.12.E+07              | 5.38.E+07              |
| 1466 | P30876    | DNA-directed RNA polymerase II subunit RPB2 [OS=Homo sapiens]                          | 21.5          | 7            | 6          | 51     | 6                 | 234                     | 42                              | 5                                            | 6                                        | 0                | 7.74.E+07          | 6.63.E+07          | 8.49.E+07          | 7.14.E+07          | 8.68.E+07              | 9.19.E+07              | 8.88.E+07              | 8.88.E+07              |
| 1467 | O75153    | Clustered mitochondria protein homolog [OS=Homo sapiens]                               | 21.4          | 5            | 4          | 67     | 4                 | 201                     | 51                              | 4                                            | 3                                        | 0                | 8.65.E+07          | 8.65.E+07          | 8.81.E+07          | 8.48.E+07          | 4.95.E+07              | 5.55.E+07              | 5.09.E+07              | 3.39.E+07              |
| 1468 | Q9UI10-1  | translation initiation factor eIF-2B subunit delta [OS=Homo sapiens]                   | 21.4          | 9            | 3          | 76     | 3                 | 833                     | 116                             | 3                                            | 3                                        | 0                | 8.22.E+07          | 8.28.E+07          | 8.29.E+07          | 7.49.E+07          | 8.34.E+07              | 8.66.E+07              | 8.92.E+07              | 7.60.E+07              |
| 1469 | P62306    | Small nuclear ribonucleoprotein F [OS=Homo sapiens]                                    | 21.4          | 34           | 3          | 104    | 3                 | 1299                    | 118                             | 3                                            | 3                                        | 0                | 2.06.E+08          | 1.88.E+08          | 1.79.E+08          | 2.11.E+08          | 1.71.E+08              | 1.43.E+08              | 1.60.E+08              | 1.39.E+08              |
| 1470 | Q9UNF1    | Melanoma-associated antigen D2 [OS=Homo sapiens]                                       | 21.4          | 15           | 5          | 46     | 5                 | 269                     | 34                              | 5                                            | 5                                        | 0                | 4.12.E+07          | 6.42.E+07          | 6.98.E+07          | 5.64.E+07          | 9.51.E+07              | 1.04.E+08              | 1.02.E+08              | 1.03.E+08              |
| 1471 | Q99653    | Calcineurin B homologous protein 1 [OS=Homo sapiens]                                   | 21.3          | 17           | 3          | 21     | 3                 | 196                     | 22                              | 3                                            | 3                                        | 0                | 4.50.E+07          | 4.97.E+07          | 4.13.E+07          | 4.91.E+07          | 2.06.E+07              | 2.04.E+07              | 2.61.E+07              | 2.82.E+07              |
| 1472 | Q8WVM8    | Sec1 family domain-containing protein 1 [OS=Homo sapiens]                              | 21.3          | 9            | 3          | 42     | 3                 | 323                     | 15                              | 2                                            | 3                                        | 0                | 1.97.E+07          | 2.08.E+07          | 1.80.E+07          | 5.19.E+07          | 6.51.E+07              | 6.91.E+07              | 2.18.E+07              | 7.51.E+07              |
| 1473 | P35052    | Glypican-1 [OS=Homo sapiens]                                                           | 21.2          | 13           | 5          | 33     | 5                 | 71                      | 33                              | 5                                            | 5                                        | 0                | 5.82.E+06          | 6.13.E+06          | 2.58.E+06          | 4.94.E+06          | 3.36.E+07              | 2.79.E+07              | 2.64.E+07              | 3.04.E+07              |



| No.  | Accession | Description                                                                       | Sum PEP Score | Coverage [%] | # Peptides | # PSMs | # Unique Peptides | Score Mascot: A5 Mascot | Score Sequest HT: A2 Sequest HT | # Peptides (by Search Engine): A2 Sequest HT | # Peptides (by Search Engine): A5 Mascot | # Razor Peptides | ctrl Abundance_s_1 | ctrl Abundance_s_2 | ctrl Abundance_s_3 | ctrl Abundance_s_4 | JAM-A KO Abundance_s_1 | JAM-A KO Abundance_s_2 | JAM-A KO Abundance_s_3 | JAM-A KO Abundance_s_4 |
|------|-----------|-----------------------------------------------------------------------------------|---------------|--------------|------------|--------|-------------------|-------------------------|---------------------------------|----------------------------------------------|------------------------------------------|------------------|--------------------|--------------------|--------------------|--------------------|------------------------|------------------------|------------------------|------------------------|
| 1474 | O95394    | phosphoacetylglucosamine mutase [OS=Homo sapiens]                                 | 21.2          | 11           | 3          | 26     | 3                 | 179                     | 31                              | 3                                            | 3                                        | 0                | 2.72.E+07          | 3.52.E+07          | 3.71.E+07          | 3.39.E+07          | 3.75.E+07              | 6.85.E+07              | 3.38.E+07              | 3.71.E+07              |
| 1475 | O75746    | Calcium-binding mitochondrial carrier protein Aralar1 [OS=Homo sapiens]           | 21.1          | 8            | 4          | 21     | 1                 | 81                      | 22                              | 4                                            | 4                                        | 0                | 4.12.E+06          | 1.03.E+07          | 2.86.E+06          | 4.37.E+06          | 7.15.E+06              | 3.09.E+06              | 1.90.E+06              | 2.68.E+06              |
| 1476 | Q68E01    | Integrator complex subunit 3 [OS=Homo sapiens]                                    | 21.1          | 4            | 2          | 84     | 2                 | 1713                    | 84                              | 2                                            | 2                                        | 0                | 2.75.E+07          | 3.03.E+07          | 2.46.E+07          | 3.16.E+07          | 3.18.E+07              | 2.63.E+07              | 2.65.E+07              | 2.75.E+07              |
| 1477 | Q9BPX3    | Condensin complex subunit 3 [OS=Homo sapiens]                                     | 21.1          | 4            | 3          | 52     | 3                 | 794                     | 44                              | 3                                            | 3                                        | 0                | 9.67.E+06          | 3.01.E+07          | 2.93.E+07          | 3.18.E+07          | 2.78.E+07              | 3.41.E+07              | 1.54.E+07              | 2.88.E+07              |
| 1478 | Q9NV17    | ATPase family AAA domain-containing protein 3A [OS=Homo sapiens]                  | 21.1          | 8            | 5          | 100    | 5                 | 638                     | 105                             | 4                                            | 5                                        | 0                | 8.76.E+07          | 9.91.E+07          | 1.19.E+08          | 9.22.E+07          | 9.30.E+07              | 1.06.E+08              | 1.04.E+08              | 9.46.E+07              |
| 1479 | P21281    | V-type proton ATPase subunit B, brain isoform [OS=Homo sapiens]                   | 21.1          | 9            | 3          | 33     | 3                 | 224                     | 56                              | 3                                            | 3                                        | 0                | 8.02.E+07          | 7.91.E+07          | 8.15.E+07          | 8.29.E+07          | 1.12.E+08              | 9.88.E+07              | 1.03.E+08              | 1.12.E+08              |
| 1480 | P32929    | Cystathionine gamma-lyase [OS=Homo sapiens]                                       | 21.1          | 12           | 2          | 70     | 2                 | 2815                    | 108                             | 2                                            | 2                                        | 0                | 3.65.E+07          | 3.90.E+07          | 3.36.E+07          | 3.76.E+07          | 3.89.E+07              | 3.48.E+07              | 3.07.E+07              | 3.36.E+07              |
| 1481 | O00422    | Histone deacetylase complex subunit SAP18 [OS=Homo sapiens]                       | 21.0          | 24           | 3          | 92     | 3                 | 1691                    | 96                              | 3                                            | 3                                        | 0                | 1.24.E+08          | 1.23.E+08          | 1.23.E+08          | 1.42.E+08          | 1.28.E+08              | 1.21.E+08              | 1.05.E+08              | 1.22.E+08              |
| 1482 | Q53GS9    | U4/U6.U5 tri-snRNP-associated protein 2 [OS=Homo sapiens]                         | 21.0          | 10           | 3          | 24     | 3                 | 176                     | 26                              | 3                                            | 3                                        | 0                | 3.51.E+07          | 3.77.E+07          | 2.97.E+07          | 3.73.E+07          | 4.68.E+07              | 4.78.E+07              | 3.57.E+07              | 4.48.E+07              |
| 1483 | Q9H0S4    | Probable ATP-dependent RNA helicase DDX47 [OS=Homo sapiens]                       | 21.0          | 11           | 3          | 43     | 3                 | 272                     | 37                              | 3                                            | 3                                        | 0                | 5.27.E+07          | 5.53.E+07          | 5.32.E+07          | 4.90.E+07          | 7.07.E+07              | 6.97.E+07              | 5.97.E+07              | 5.74.E+07              |
| 1484 | P51571    | translocon-associated protein subunit delta [OS=Homo sapiens]                     | 20.9          | 23           | 3          | 159    | 3                 | 2248                    | 250                             | 3                                            | 3                                        | 0                | 2.22.E+08          | 2.35.E+08          | 2.25.E+08          | 2.20.E+08          | 3.75.E+08              | 2.84.E+08              | 2.64.E+08              | 3.60.E+08              |
| 1485 | Q96HV5    | Transmembrane protein 41A [OS=Homo sapiens]                                       | 20.9          | 11           | 2          | 28     | 2                 | 258                     | 18                              | 2                                            | 2                                        | 0                | 2.57.E+07          | 1.94.E+07          | 1.85.E+07          | 2.17.E+07          | 2.08.E+07              | 2.10.E+07              | 2.78.E+07              | 1.93.E+07              |
| 1486 | Q96KR1    | Zinc finger RNA-binding protein [OS=Homo sapiens]                                 | 20.9          | 4            | 3          | 16     | 3                 | 264                     | 16                              | 3                                            | 3                                        | 0                | 1.60.E+07          | 1.52.E+07          | 1.22.E+07          | 1.70.E+07          | 1.73.E+07              | 1.77.E+07              | 2.23.E+07              | 1.78.E+07              |
| 1487 | Q96EK6    | glucosamine 6-phosphate N-acetyltransferase [OS=Homo sapiens]                     | 20.8          | 26           | 2          | 74     | 2                 | 179                     | 90                              | 2                                            | 2                                        | 0                | 6.05.E+07          | 6.21.E+07          | 5.15.E+07          | 6.05.E+07          | 9.13.E+07              | 9.72.E+07              | 4.58.E+07              | 8.42.E+07              |
| 1488 | O14548    | Cytochrome c oxidase subunit 7A-related protein, mitochondrial [OS=Homo sapiens]  | 20.7          | 40           | 2          | 42     | 2                 | 330                     | 53                              | 2                                            | 2                                        | 0                | 2.31.E+07          | 1.91.E+07          | 1.65.E+07          | 2.11.E+07          | 1.86.E+07              | 2.00.E+07              | 8.34.E+06              | 1.95.E+07              |
| 1489 | P78310-1  | Coxsackievirus and adenovirus receptor [OS=Homo sapiens]                          | 20.7          | 10           | 2          | 47     | 2                 | 1016                    | 61                              | 2                                            | 2                                        | 0                | 2.20.E+07          | 3.65.E+07          | 2.44.E+07          | 3.60.E+07          | 6.54.E+07              | 5.46.E+07              | 6.27.E+07              | 6.72.E+07              |
| 1490 | P43353-1  | Aldehyde dehydrogenase family 3 member B1 [OS=Homo sapiens]                       | 20.6          | 6            | 2          | 47     | 1                 | 230                     | 58                              | 2                                            | 2                                        | 0                | 8.67.E+06          | 7.54.E+06          | 9.02.E+06          |                    | 1.61.E+07              | 1.25.E+07              | 1.26.E+07              | 1.41.E+07              |
| 1491 | O75629    | Protein CREG1 [OS=Homo sapiens]                                                   | 20.5          | 18           | 3          | 36     | 3                 | 420                     | 52                              | 3                                            | 2                                        | 0                | 6.87.E+07          | 6.73.E+07          | 6.09.E+07          | 6.66.E+07          | 9.61.E+07              | 1.03.E+08              | 1.10.E+08              | 1.07.E+08              |
| 1492 | Q9UBQ7    | Glyoxylate reductase/hydroxypruvate reductase [OS=Homo sapiens]                   | 20.5          | 16           | 3          | 59     | 3                 | 187                     | 93                              | 3                                            | 3                                        | 0                | 5.27.E+07          | 5.93.E+07          | 7.42.E+07          | 6.75.E+07          | 7.51.E+07              | 7.18.E+07              | 7.13.E+07              | 5.90.E+07              |
| 1493 | P62273-1  | 40S ribosomal protein S29 [OS=Homo sapiens]                                       | 20.4          | 34           | 2          | 139    | 2                 | 711                     | 12                              | 1                                            | 2                                        | 0                | 5.05.E+08          | 4.51.E+08          | 5.23.E+08          | 6.02.E+08          | 4.04.E+08              | 4.30.E+08              | 4.94.E+08              | 4.34.E+08              |
| 1494 | Q9Y320    | Thioredoxin-related transmembrane protein 2 [OS=Homo sapiens]                     | 20.4          | 18           | 4          | 67     | 4                 | 1923                    | 5                               | 3                                            | 4                                        | 0                | 4.55.E+07          | 4.55.E+07          | 5.00.E+07          | 4.61.E+07          | 6.70.E+07              | 6.75.E+07              | 4.09.E+07              | 6.43.E+07              |
| 1495 | P14678-1  | Small nuclear ribonucleoprotein-associated proteins B and B' [OS=Homo sapiens]    | 20.4          | 15           | 4          | 172    | 4                 | 1544                    | 97                              | 4                                            | 4                                        | 0                | 4.29.E+08          | 4.28.E+08          | 4.34.E+08          | 3.86.E+08          | 3.70.E+08              | 3.81.E+08              | 3.96.E+08              | 3.92.E+08              |
| 1496 | Q15435    | Protein phosphatase 1 regulatory subunit 7 [OS=Homo sapiens]                      | 20.4          | 10           | 3          | 80     | 3                 | 817                     | 95                              | 3                                            | 3                                        | 0                | 5.45.E+07          | 5.52.E+07          | 5.69.E+07          | 5.46.E+07          | 6.93.E+07              | 7.23.E+07              | 4.68.E+07              | 4.95.E+07              |
| 1497 | P11177    | Pyruvate dehydrogenase E1 component subunit beta, mitochondrial [OS=Homo sapiens] | 20.4          | 13           | 3          | 84     | 3                 | 553                     | 72                              | 3                                            | 3                                        | 0                | 1.63.E+08          | 1.65.E+08          | 1.54.E+08          | 1.68.E+08          | 3.69.E+08              | 2.09.E+08              | 3.37.E+08              | 3.68.E+08              |
| 1498 | Q92600    | CCR4-NOT transcription complex subunit 9 [OS=Homo sapiens]                        | 20.3          | 11           | 2          | 60     | 2                 | 466                     | 59                              | 2                                            | 2                                        | 0                | 3.57.E+07          | 3.76.E+07          | 3.36.E+07          | 3.24.E+07          | 2.97.E+07              | 2.80.E+07              | 1.19.E+07              | 2.76.E+07              |
| 1499 | P21399    | Cytoplasmic aconitate hydratase [OS=Homo sapiens]                                 | 20.3          | 8            | 4          | 18     | 4                 | 142                     | 24                              | 4                                            | 4                                        | 0                | 2.49.E+07          | 2.18.E+07          | 3.29.E+07          | 2.09.E+07          | 5.45.E+07              | 5.50.E+07              | 5.46.E+07              | 5.96.E+07              |
| 1500 | Q92530    | proteasome inhibitor PI31 subunit [OS=Homo sapiens]                               | 20.3          | 12           | 2          | 45     | 2                 | 1504                    | 22                              | 1                                            | 2                                        | 0                | 4.51.E+07          | 4.18.E+07          | 3.98.E+07          | 4.01.E+07          | 4.16.E+07              | 3.92.E+07              | 3.83.E+07              | 4.34.E+07              |
| 1501 | O75431    | Metaxin-2 [OS=Homo sapiens]                                                       | 20.3          | 19           | 2          | 18     | 2                 | 79                      | 18                              | 1                                            | 2                                        | 0                | 1.60.E+07          | 2.99.E+07          | 1.21.E+07          | 3.18.E+07          | 3.35.E+07              | 2.05.E+07              | 3.07.E+07              | 2.09.E+07              |
| 1502 | Q14011    | Cold-inducible RNA-binding protein [OS=Homo sapiens]                              | 20.2          | 20           | 3          | 81     | 3                 | 1662                    | 116                             | 2                                            | 3                                        | 0                | 5.08.E+07          | 5.98.E+07          | 4.46.E+07          | 6.21.E+07          | 5.91.E+07              | 5.40.E+07              | 4.78.E+07              | 6.23.E+07              |
| 1503 | Q86UP2-1  | Kinectin [OS=Homo sapiens]                                                        | 20.2          | 4            | 4          | 41     | 4                 | 319                     | 44                              | 3                                            | 4                                        | 0                | 1.99.E+07          | 2.67.E+07          | 3.77.E+07          | 3.71.E+07          | 5.74.E+07              | 6.11.E+07              | 5.40.E+07              | 5.68.E+07              |
| 1504 | Q9NW13-1  | RNA-binding protein 28 [OS=Homo sapiens]                                          | 20.1          | 6            | 4          | 33     | 4                 | 211                     | 4                               | 3                                            | 4                                        | 0                | 4.16.E+07          | 2.78.E+07          | 4.02.E+07          | 2.91.E+07          | 1.14.E+07              | 3.09.E+07              | 2.65.E+07              | 2.95.E+07              |
| 1505 | P61011-1  | signal recognition particle 54 kDa protein [OS=Homo sapiens]                      | 20.1          | 11           | 4          | 42     | 4                 | 186                     | 19                              | 4                                            | 4                                        | 0                | 4.50.E+07          | 5.14.E+07          | 4.90.E+07          | 4.64.E+07          | 6.24.E+07              | 6.20.E+07              | 6.80.E+07              | 5.66.E+07              |
| 1506 | P35613    | Basigin [OS=Homo sapiens]                                                         | 20.0          | 8            | 2          | 49     | 2                 | 272                     | 56                              | 2                                            | 2                                        | 0                | 6.81.E+07          | 6.97.E+07          | 7.47.E+07          | 7.60.E+07          | 9.86.E+07              | 9.41.E+07              | 1.08.E+08              | 1.05.E+08              |
| 1507 | Q9BTE6-1  | Alanyl-tRNA editing protein Aarsd1 [OS=Homo sapiens]                              | 20.0          | 15           | 4          | 18     | 4                 | 108                     | 20                              | 4                                            | 4                                        | 0                | 3.64.E+07          | 3.27.E+07          | 2.78.E+07          | 3.29.E+07          | 7.96.E+07              | 8.43.E+07              | 7.29.E+07              | 7.88.E+07              |
| 1508 | P34949    | mannose-6-phosphate isomerase [OS=Homo sapiens]                                   | 20.0          | 13           | 3          | 20     | 3                 | 138                     | 27                              | 3                                            | 3                                        | 0                | 2.40.E+07          | 2.91.E+07          | 2.80.E+07          | 3.23.E+07          | 4.69.E+07              | 5.15.E+07              | 4.00.E+07              | 6.59.E+07              |
| 1509 | Q03701    | CCAAT/enhancer-binding protein zeta [OS=Homo sapiens]                             | 19.8          | 5            | 3          | 23     | 3                 | 155                     | 10                              | 3                                            | 2                                        | 0                | 3.08.E+07          | 3.75.E+07          | 2.83.E+07          | 4.14.E+07          | 2.88.E+07              | 4.52.E+07              | 2.52.E+07              | 3.70.E+07              |
| 1510 | P24941-1  | cyclin-dependent kinase 2 [OS=Homo sapiens]                                       | 19.8          | 12           | 3          | 45     | 2                 | 695                     | 57                              | 3                                            | 3                                        | 0                | 4.08.E+07          | 1.61.E+07          | 4.23.E+07          | 3.93.E+07          | 5.12.E+07              | 1.64.E+07              | 1.97.E+07              | 4.82.E+07              |
| 1511 | Q9C0B1-1  | alpha-ketoglutarate-dependent dioxygenase FTO [OS=Homo sapiens]                   | 19.7          | 8            | 3          | 63     | 3                 | 1299                    | 57                              | 3                                            | 3                                        | 0                | 2.53.E+07          | 2.93.E+07          | 2.75.E+07          | 2.51.E+07          | 3.71.E+07              | 3.76.E+07              | 2.05.E+07              | 3.23.E+07              |
| 1512 | Q9UHV9    | Prefoldin subunit 2 [OS=Homo sapiens]                                             | 19.6          | 17           | 2          | 88     | 2                 | 1336                    | 130                             | 2                                            | 2                                        | 0                | 1.41.E+08          | 1.52.E+08          | 1.45.E+08          | 1.38.E+08          | 1.01.E+08              | 1.66.E+08              | 1.57.E+08              | 8.36.E+07              |
| 1513 | Q9UNW1    | Multiple inositol polyphosphate phosphatase 1 [OS=Homo sapiens]                   | 19.6          | 10           | 2          | 35     | 2                 | 251                     | 32                              | 2                                            | 2                                        | 0                | 6.07.E+06          | 1.80.E+07          | 1.60.E+07          | 5.95.E+06          | 2.76.E+07              | 2.24.E+07              | 1.39.E+07              | 1.79.E+07              |
| 1514 | O43488    | aflatoxin B1 aldehyde reductase member 2 [OS=Homo sapiens]                        | 19.6          | 9            | 2          | 32     | 2                 | 265                     | 43                              | 2                                            | 2                                        | 0                | 3.86.E+07          | 4.30.E+07          | 4.26.E+07          | 4.17.E+07          | 5.17.E+07              | 4.75.E+07              | 3.02.E+07              | 4.42.E+07              |
| 1515 | Q15125    | 3-beta-hydroxysteroid-delta(8),delta(7)-isomerase [OS=Homo sapiens]               | 19.5          | 7            | 1          | 18     | 1                 | 349                     |                                 |                                              | 1                                        | 0                | 1.22.E+08          | 1.29.E+08          | 1.37.E+08          | 1.05.E+08          | 1.90.E+08              | 1.92.E+08              | 2.05.E+08              | 1.96.E+08              |
| 1516 | P53007    | Tricarboxylate transport protein, mitochondrial [OS=Homo sapiens]                 | 19.5          | 17           | 5          | 32     | 5                 | 116                     | 20                              | 5                                            | 5                                        | 0                | 6.95.E+07          | 6.75.E+07          | 6.51.E+07          | 7.40.E+07          | 6.26.E+07              | 6.69.E+07              | 6.66.E+07              | 6.86.E+07              |
| 1517 | O75396    | Vesicle-trafficking protein SEC22b [OS=Homo sapiens]                              | 19.4          | 25           | 3          | 18     | 3                 | 241                     | 19                              | 3                                            | 3                                        | 0                | 2.80.E+07          | 2.66.E+07          |                    | 2.34.E+07          | 4.71.E+07              | 4.58.E+07              | 4.50.E+07              | 3.91.E+07              |
| 1518 | P24468    | COUP transcription factor 2 [OS=Homo sapiens]                                     | 19.4          | 8            | 2          | 18     | 2                 | 389                     | 22                              | 2                                            | 2                                        | 0                | 9.06.E+06          | 1.58.E+07          | 1.06.E+07          |                    | 3.49.E+07              | 3.06.E+07              | 3.02.E+07              | 2.73.E+07              |
| 1519 | Q9Y6N5    | Sulfide:quinone oxidoreductase, mitochondrial [OS=Homo sapiens]                   | 19.4          | 9            | 3          | 10     | 3                 | 87                      | 12                              | 3                                            | 3                                        | 0                | 6.76.E+07          | 1.04.E+08          | 7.83.E+07          | 8.08.E+07          | 3.97.E+07              | 3.90.E+07              | 4.59.E+07              | 4.78.E+07              |
| 1520 | Q53T59    | HCLS1-binding protein 3 [OS=Homo sapiens]                                         | 19.4          | 9            | 2          | 8      | 2                 | 176                     | 11                              | 2                                            | 2                                        | 0                | 1.51.E+07          | 1.71.E+07          | 1.31.E+07          | 1.74.E+07          | 4.04.E+07              | 3.89.E+07              | 2.70.E+07              | 3.57.E+07              |

| No.  | Accession | Description                                                                            | Sum PEP Score | Coverage [%] | # Peptides | # PSMs | # Unique Peptides | Score Mascot: A5 Mascot | Score Sequest HT: A2 Sequest HT | # Peptides (by Search Engine): A2 Sequest HT | # Peptides (by Search Engine): A5 Mascot | # Razor Peptides | ctrl Abundance s_1 | ctrl Abundance s_2 | ctrl Abundance s_3 | ctrl Abundance s_4 | JAM-A KO Abundance s_1 | JAM-A KO Abundance s_2 | JAM-A KO Abundance s_3 | JAM-A KO Abundance s_4 |
|------|-----------|----------------------------------------------------------------------------------------|---------------|--------------|------------|--------|-------------------|-------------------------|---------------------------------|----------------------------------------------|------------------------------------------|------------------|--------------------|--------------------|--------------------|--------------------|------------------------|------------------------|------------------------|------------------------|
| 1521 | O00217    | NADH dehydrogenase [ubiquinone] iron-sulfur protein 8, mitochondrial [OS=Homo sapiens] | 19.3          | 13           | 2          | 28     | 2                 | 280                     | 23                              | 2                                            | 2                                        | 0                | 1.95.E+07          | 2.37.E+07          | 1.49.E+07          | 2.05.E+07          | 3.40.E+07              | 3.68.E+07              | 2.79.E+07              | 3.95.E+07              |
| 1522 | P26006    | Integrin alpha-3 [OS=Homo sapiens]                                                     | 19.3          | 4            | 5          | 39     | 5                 | 184                     | 42                              | 5                                            | 5                                        | 0                | 1.55.E+08          | 1.28.E+08          | 1.39.E+08          | 1.24.E+08          | 1.72.E+08              | 1.64.E+08              | 1.82.E+08              | 1.77.E+08              |
| 1523 | Q9NHPQ8   | Synembryon-A [OS=Homo sapiens]                                                         | 19.3          | 9            | 4          | 62     | 4                 | 493                     | 51                              | 4                                            | 4                                        | 0                | 5.27.E+07          | 5.52.E+07          | 5.42.E+07          | 5.39.E+07          | 7.36.E+07              | 7.83.E+07              | 7.72.E+07              | 7.22.E+07              |
| 1524 | Q9UPY5    | Cystine/glutamate transporter [OS=Homo sapiens]                                        | 19.2          | 8            | 3          | 66     | 3                 | 714                     | 80                              | 2                                            | 3                                        | 0                | 4.80.E+07          | 5.06.E+07          | 4.83.E+07          | 5.13.E+07          | 6.82.E+07              | 6.81.E+07              | 6.28.E+07              | 6.64.E+07              |
| 1525 | Q8NB72    | kinetochore protein SPC24 [OS=Homo sapiens]                                            | 19.2          | 9            | 1          | 20     | 1                 | 393                     | 20                              | 1                                            | 1                                        | 0                | 2.32.E+06          | 5.46.E+06          | 7.68.E+06          | 9.59.E+06          | 1.40.E+07              | 1.16.E+07              | 1.02.E+07              | 9.75.E+06              |
| 1526 | P58546    | Myotrophin [OS=Homo sapiens]                                                           | 19.2          | 32           | 2          | 70     | 2                 | 1571                    | 123                             | 2                                            | 2                                        | 0                | 7.24.E+07          | 8.02.E+07          | 7.83.E+07          | 7.50.E+07          | 8.77.E+07              | 8.04.E+07              | 8.33.E+07              | 8.76.E+07              |
| 1527 | P60510    | Serine/threonine-protein phosphatase 4 catalytic subunit [OS=Homo sapiens]             | 19.1          | 21           | 4          | 32     | 3                 | 620                     | 51                              | 4                                            | 2                                        | 0                |                    |                    |                    |                    | 3.36.E+07              | 3.39.E+07              | 3.56.E+07              | 3.60.E+07              |
| 1528 | Q9BW60    | Elongation of very long chain fatty acids protein 1 [OS=Homo sapiens]                  | 19.1          | 10           | 2          | 96     | 2                 | 1575                    | 109                             | 2                                            | 2                                        | 0                | 3.92.E+07          | 3.86.E+07          | 3.53.E+07          | 3.47.E+07          | 2.49.E+07              | 2.39.E+07              | 2.24.E+07              | 2.31.E+07              |
| 1529 | P35250-1  | Replication factor C subunit 2 [OS=Homo sapiens]                                       | 19.1          | 10           | 2          | 28     | 2                 | 244                     | 31                              | 2                                            | 2                                        | 0                | 1.99.E+07          | 2.33.E+07          | 2.12.E+07          | 2.06.E+07          | 2.40.E+07              | 2.43.E+07              | 2.54.E+07              | 2.41.E+07              |
| 1530 | Q9NPF79   | Vacuolar protein sorting-associated protein VTA1 homolog [OS=Homo sapiens]             | 19.0          | 14           | 2          | 10     | 2                 | 90                      | 13                              | 2                                            | 2                                        | 0                | 3.93.E+07          | 4.11.E+07          | 4.76.E+07          | 4.47.E+07          | 6.60.E+07              | 6.32.E+07              | 3.52.E+07              | 5.76.E+07              |
| 1531 | Q15061    | WD repeat-containing protein 43 [OS=Homo sapiens]                                      | 19.0          | 9            | 3          | 19     | 3                 | 149                     | 15                              | 2                                            | 3                                        | 0                | 3.98.E+07          | 4.17.E+07          | 5.82.E+07          | 4.56.E+07          | 4.01.E+07              | 4.69.E+07              | 4.13.E+07              | 4.57.E+07              |
| 1532 | Q13405    | 39S ribosomal protein L49, mitochondrial [OS=Homo sapiens]                             | 18.9          | 15           | 2          | 68     | 2                 | 1380                    | 69                              | 2                                            | 2                                        | 0                | 2.98.E+07          | 3.38.E+07          | 2.66.E+07          | 3.25.E+07          | 4.11.E+07              | 4.46.E+07              | 3.45.E+07              | 4.43.E+07              |
| 1533 | P17480-1  | Nucleolar transcription factor 1 [OS=Homo sapiens]                                     | 18.9          | 5            | 3          | 48     | 3                 | 276                     | 65                              | 3                                            | 3                                        | 0                | 4.82.E+07          | 5.95.E+07          | 4.96.E+07          | 5.98.E+07          | 6.22.E+07              | 5.85.E+07              | 5.98.E+07              | 6.80.E+07              |
| 1534 | O14974    | Protein phosphatase 1 regulatory subunit 12A [OS=Homo sapiens]                         | 18.9          | 3            | 3          | 57     | 3                 | 508                     | 23                              | 3                                            | 3                                        | 0                | 3.50.E+07          | 2.16.E+07          | 3.64.E+07          | 2.63.E+07          | 2.29.E+07              | 2.97.E+07              | 2.95.E+07              | 3.19.E+07              |
| 1535 | Q92900    | Regulator of nonsense transcripts 1 [OS=Homo sapiens]                                  | 18.8          | 6            | 6          | 66     | 6                 | 135                     | 17                              | 6                                            | 6                                        | 0                | 8.08.E+07          | 8.61.E+07          | 7.80.E+07          | 7.57.E+07          | 9.26.E+07              | 9.26.E+07              | 8.34.E+07              | 8.86.E+07              |
| 1536 | Q9Y5L4    | mitochondrial import inner membrane translocase subunit TIM13 [OS=Homo sapiens]        | 18.8          | 41           | 3          | 63     | 3                 | 1061                    | 80                              | 3                                            | 3                                        | 0                | 8.94.E+07          | 9.40.E+07          | 9.48.E+07          | 8.44.E+07          | 6.47.E+07              | 7.34.E+07              | 8.04.E+07              | 6.66.E+07              |
| 1537 | P57735    | ras-related protein Rab-25 [OS=Homo sapiens]                                           | 18.6          | 20           | 3          | 20     | 3                 | 85                      | 23                              | 3                                            | 3                                        | 0                | 1.27.E+08          | 1.21.E+08          | 1.24.E+08          | 9.59.E+07          | 2.00.E+07              | 4.05.E+07              | 5.77.E+07              | 1.86.E+07              |
| 1538 | Q15286    | Ras-related protein Rab-35 [OS=Homo sapiens]                                           | 18.6          | 18           | 3          | 328    | 1                 | 4659                    | 417                             | 3                                            | 3                                        | 0                |                    |                    |                    |                    |                        |                        |                        |                        |
| 1539 | Q7L576-1  | cytoplasmic FMR1-interacting protein 1 [OS=Homo sapiens]                               | 18.6          | 3            | 3          | 48     | 3                 | 279                     | 34                              | 3                                            | 3                                        | 0                | 2.06.E+07          | 2.14.E+07          | 2.93.E+07          | 2.88.E+07          | 3.87.E+07              | 4.05.E+07              | 3.55.E+07              | 2.93.E+07              |
| 1540 | Q9Y624    | Junctional adhesion molecule A [OS=Homo sapiens]                                       | 18.5          | 14           | 2          | 34     | 2                 | 242                     | 60                              | 2                                            | 2                                        | 0                | 9.29.E+07          | 1.03.E+08          | 9.67.E+07          | 8.76.E+07          |                        |                        |                        |                        |
| 1541 | P41240    | tyrosine-protein kinase CSK [OS=Homo sapiens]                                          | 18.5          | 9            | 3          | 50     | 3                 | 336                     | 30                              | 3                                            | 3                                        | 0                | 2.70.E+07          | 2.75.E+07          | 2.58.E+07          | 2.68.E+07          | 2.58.E+07              | 2.68.E+07              | 2.20.E+07              | 2.91.E+07              |
| 1542 | P18827    | syndecan-1 [OS=Homo sapiens]                                                           | 18.5          | 12           | 2          | 30     | 2                 | 375                     | 48                              | 2                                            | 2                                        | 0                | 3.56.E+07          | 3.89.E+07          | 3.46.E+07          | 3.22.E+07          | 5.54.E+07              | 4.48.E+07              | 4.68.E+07              | 8.72.E+07              |
| 1543 | Q9UK22    | F-box only protein 2 [OS=Homo sapiens]                                                 | 18.5          | 14           | 3          | 67     | 3                 | 597                     | 62                              | 3                                            | 3                                        | 0                | 3.12.E+07          | 3.42.E+07          | 2.91.E+07          | 3.25.E+07          | 4.23.E+07              | 3.72.E+07              | 3.60.E+07              | 3.66.E+07              |
| 1544 | P54725-1  | UV excision repair protein RAD23 homolog A [OS=Homo sapiens]                           | 18.5          | 11           | 2          | 64     | 2                 | 1708                    | 141                             | 2                                            | 2                                        | 0                | 2.49.E+07          | 2.83.E+07          | 2.71.E+07          | 3.06.E+07          | 3.82.E+07              | 2.82.E+07              | 2.53.E+07              | 3.15.E+07              |
| 1545 | Q9NR12-1  | PDZ and LIM domain protein 7 [OS=Homo sapiens]                                         | 18.4          | 12           | 4          | 27     | 4                 | 104                     | 21                              | 4                                            | 4                                        | 0                | 6.12.E+07          | 3.41.E+07          | 6.37.E+07          | 2.76.E+07          | 1.25.E+07              | 6.89.E+07              | 9.32.E+07              | 8.52.E+07              |
| 1546 | O60907    | F-box-like/WD repeat-containing protein TBL1X [OS=Homo sapiens]                        | 18.4          | 7            | 2          | 36     | 2                 | 711                     | 48                              | 2                                            | 2                                        | 0                | 1.17.E+07          | 1.43.E+07          | 1.34.E+07          | 1.66.E+07          | 1.84.E+07              | 8.50.E+06              | 1.75.E+07              | 1.91.E+07              |
| 1547 | Q95777    | U6 snRNA-associated Sm-like protein Lsm8 [OS=Homo sapiens]                             | 18.4          | 38           | 3          | 41     | 3                 | 238                     | 36                              | 2                                            | 3                                        | 0                | 6.25.E+07          | 8.04.E+07          | 5.53.E+07          | 7.78.E+07          | 6.38.E+07              | 9.27.E+07              | 8.17.E+07              | 9.52.E+07              |
| 1548 | Q9P2R7    | Succinate-CoA ligase [ADP-forming] subunit beta, mitochondrial [OS=Homo sapiens]       | 18.4          | 10           | 5          | 64     | 5                 | 267                     | 23                              | 5                                            | 5                                        | 0                | 5.25.E+07          | 4.99.E+07          | 5.43.E+07          | 5.28.E+07          | 5.38.E+07              | 5.25.E+07              | 5.59.E+07              | 5.22.E+07              |
| 1549 | P53985    | Monocarboxylate transporter 1 [OS=Homo sapiens]                                        | 18.3          | 11           | 4          | 35     | 4                 | 132                     | 27                              | 4                                            | 3                                        | 0                | 3.43.E+07          | 2.01.E+07          | 2.09.E+07          | 3.31.E+07          | 3.64.E+07              | 3.81.E+07              | 4.34.E+07              | 2.20.E+07              |
| 1550 | Q96CS3    | FAN-associated factor 2 [OS=Homo sapiens]                                              | 18.3          | 7            | 2          | 44     | 2                 | 630                     | 61                              | 2                                            | 2                                        | 0                | 3.85.E+07          | 3.80.E+07          | 3.65.E+07          | 3.61.E+07          | 4.90.E+07              | 4.67.E+07              | 3.79.E+07              | 4.13.E+07              |
| 1551 | Q00653-1  | Nuclear factor NF-kappa-B p100 subunit [OS=Homo sapiens]                               | 18.3          | 8            | 3          | 42     | 3                 | 130                     | 45                              | 3                                            | 3                                        | 0                | 6.52.E+07          | 6.93.E+07          | 4.02.E+07          | 5.83.E+07          | 5.95.E+07              | 6.27.E+07              | 4.98.E+07              | 5.01.E+07              |
| 1552 | P22059    | Oxysterol-binding protein 1 [OS=Homo sapiens]                                          | 18.3          | 8            | 4          | 42     | 4                 | 63                      | 22                              | 4                                            | 4                                        | 0                | 2.00.E+07          | 1.72.E+07          | 2.57.E+07          | 1.69.E+07          | 2.17.E+07              | 2.20.E+07              | 2.05.E+07              | 2.33.E+07              |
| 1553 | Q92890    | Ubiquitin recognition factor in ER-associated degradation protein 1 [OS=Homo sapiens]  | 18.2          | 17           | 3          | 37     | 3                 | 966                     | 49                              | 3                                            | 3                                        | 0                | 1.03.E+08          | 1.05.E+08          | 1.14.E+08          | 1.13.E+08          | 1.03.E+08              | 1.09.E+08              | 1.05.E+08              | 1.02.E+08              |
| 1554 | Q15796-1  | Mothers against decapentaplegic homolog 2 [OS=Homo sapiens]                            | 18.2          | 10           | 4          | 90     | 4                 | 318                     | 83                              | 4                                            | 4                                        | 0                | 1.47.E+08          | 1.38.E+08          | 1.39.E+08          | 1.18.E+08          | 1.19.E+08              | 1.58.E+08              | 1.02.E+08              | 1.21.E+08              |
| 1555 | Q7L014    | probable ATP-dependent RNA helicase DDX46 [OS=Homo sapiens]                            | 18.1          | 4            | 3          | 62     | 3                 | 604                     | 61                              | 3                                            | 3                                        | 0                | 5.54.E+07          | 4.54.E+07          | 5.46.E+07          | 4.84.E+07          | 5.27.E+07              | 4.38.E+07              | 5.41.E+07              | 4.52.E+07              |
| 1556 | Q04323-1  | UBX domain-containing protein 1 [OS=Homo sapiens]                                      | 18.1          | 31           | 3          | 37     | 3                 | 138                     | 9                               | 3                                            | 3                                        | 0                | 5.58.E+07          | 5.52.E+07          | 5.77.E+07          | 5.68.E+07          | 4.60.E+07              | 2.92.E+07              | 2.29.E+07              | 3.51.E+07              |
| 1557 | P15328    | Folate receptor alpha [OS=Homo sapiens]                                                | 18.0          | 17           | 2          | 6      | 2                 | 72                      | 11                              | 2                                            | 1                                        | 0                | 1.12.E+07          | 1.97.E+07          | 1.06.E+07          | 1.35.E+07          |                        |                        |                        |                        |
| 1558 | P15291    | Beta-1,4-galactosyltransferase 1 [OS=Homo sapiens]                                     | 18.0          | 12           | 3          | 71     | 3                 | 751                     | 77                              | 3                                            | 3                                        | 0                | 5.21.E+07          | 5.86.E+07          | 4.73.E+07          | 5.06.E+07          | 7.59.E+07              | 7.02.E+07              | 6.53.E+07              | 7.41.E+07              |
| 1559 | Q5SRE5    | Nucleoporin NUP188 homolog [OS=Homo sapiens]                                           | 18.0          | 3            | 3          | 46     | 3                 | 925                     | 28                              | 3                                            | 3                                        | 0                | 8.40.E+06          | 1.16.E+07          | 8.49.E+06          | 1.05.E+07          | 1.37.E+07              | 1.10.E+07              | 1.01.E+07              | 1.01.E+07              |
| 1560 | Q969X5    | Endoplasmic reticulum-Golgi intermediate compartment protein 1 [OS=Homo sapiens]       | 17.9          | 11           | 2          | 28     | 2                 | 305                     | 30                              | 2                                            | 2                                        | 0                | 2.98.E+07          | 2.65.E+07          | 2.82.E+07          | 3.00.E+07          | 5.78.E+07              | 5.62.E+07              | 2.71.E+07              | 4.80.E+07              |
| 1561 | P09543-1  | 2',3'-cyclic-nucleotide 3'-phosphodiesterase [OS=Homo sapiens]                         | 17.9          | 9            | 2          | 33     | 2                 | 472                     | 25                              | 2                                            | 2                                        | 0                | 1.45.E+07          | 1.41.E+07          | 1.39.E+07          | 1.39.E+07          | 1.56.E+07              | 1.53.E+07              | 1.38.E+07              | 1.51.E+07              |
| 1562 | P57076    | UPF0769 protein C21orf59 [OS=Homo sapiens]                                             | 17.9          | 15           | 2          | 43     | 2                 | 849                     | 88                              | 2                                            | 2                                        | 0                | 1.92.E+07          | 2.15.E+07          | 1.86.E+07          | 1.97.E+07          | 2.44.E+07              | 2.60.E+07              | 2.08.E+07              | 2.50.E+07              |
| 1563 | Q9UKD2    | mRNA turnover protein 4 homolog [OS=Homo sapiens]                                      | 17.9          | 24           | 4          | 91     | 4                 | 323                     | 72                              | 4                                            | 4                                        | 0                | 5.59.E+08          | 6.18.E+08          | 5.11.E+08          | 5.61.E+08          | 7.99.E+08              | 8.24.E+08              | 6.11.E+08              | 6.75.E+08              |
| 1564 | Q9NRR5-1  | Ubiquilin-4 [OS=Homo sapiens]                                                          | 17.9          | 4            | 3          | 22     | 3                 | 323                     | 37                              | 3                                            | 2                                        | 0                | 6.62.E+07          | 8.82.E+07          | 6.19.E+07          | 7.95.E+07          | 7.37.E+07              | 8.21.E+07              | 5.51.E+07              | 8.99.E+07              |
| 1565 | Q8N3R9-1  | MAGUK p55 subfamily member 5 [OS=Homo sapiens]                                         | 17.9          | 9            | 4          | 17     | 4                 | 90                      | 11                              | 3                                            | 4                                        | 0                | 2.94.E+07          | 3.65.E+07          | 2.97.E+07          | 3.12.E+07          | 4.13.E+07              | 3.72.E+07              | 3.73.E+07              | 3.97.E+07              |
| 1566 | Q9BTV4    | Transmembrane protein 43 [OS=Homo sapiens]                                             | 17.8          | 9            | 2          | 41     | 2                 | 150                     | 63                              | 2                                            | 2                                        | 0                | 2.76.E+07          | 3.11.E+07          | 2.84.E+07          | 2.33.E+07          | 3.44.E+07              | 3.33.E+07              | 1.93.E+07              | 2.72.E+07              |
| 1567 | Q8N668    | COMM domain-containing protein 1 [OS=Homo sapiens]                                     | 17.7          | 18           | 1          | 22     | 1                 | 499                     |                                 |                                              | 1                                        | 0                | 1.72.E+07          | 2.15.E+07          | 1.87.E+07          | 1.99.E+07          | 2.13.E+07              | 2.11.E+07              | 1.75.E+07              | 1.56.E+07              |
| 1568 | Q6NUK1    | Calcium-binding mitochondrial carrier protein SCaMC-1 [OS=Homo sapiens]                | 17.6          | 9            | 3          | 32     | 3                 | 107                     | 29                              | 3                                            | 3                                        | 0                | 1.64.E+07          | 1.64.E+07          | 2.02.E+07          | 1.55.E+07          | 5.54.E+07              | 7.72.E+07              | 6.24.E+07              | 7.17.E+07              |
| 1569 | Q9BQA1    | Methylosome protein 50 [OS=Homo sapiens]                                               | 17.6          | 25           | 5          | 90     | 5                 | 473                     | 71                              | 5                                            | 4                                        | 0                | 1.56.E+08          | 1.46.E+08          | 1.42.E+08          | 1.44.E+08          | 1.73.E+08              | 1.79.E+08              | 1.73.E+08              | 1.59.E+08              |
| 1570 | Q8IXM3    | 39S ribosomal protein L41, mitochondrial [OS=Homo sapiens]                             | 17.6          | 31           | 2          | 84     | 2                 | 1364                    | 107                             | 2                                            | 2                                        | 0                | 4.43.E+07          | 4.71.E+07          | 4.08.E+07          | 4.71.E+07          | 5.17.E+07              | 5.16.E+07              | 4.89.E+07              | 4.78.E+07              |
| 1571 | O60341    | Lysine-specific histone demethylase 1A [OS=Homo sapiens]                               | 17.5          | 4            | 2          | 22     | 2                 | 173                     | 23                              | 2                                            | 2                                        | 0                | 3.22.E+07          | 2.98.E+07          | 3.25.E+07          | 2.68.E+07          | 2.86.E+07              | 2.23.E+07              | 2.45.E+07              | 2.23.E+07              |

| No.  | Accession | Description                                                                                          | Sum PEP Score | Coverage [%] | # Peptides | # PSMs | # Unique Peptides | Score Mascot: A5 Mascot | Score Sequest HT: A2 Sequest HT | # Peptides (by Search Engine): A2 Sequest HT | # Peptides (by Search Engine): A5 Mascot | # Razor Peptides | ctrl Abundance s_1 | ctrl Abundance s_2 | ctrl Abundance s_3 | ctrl Abundance s_4 | JAM-A KO Abundance s_1 | JAM-A KO Abundance s_2 | JAM-A KO Abundance s_3 | JAM-A KO Abundance s_4 |
|------|-----------|------------------------------------------------------------------------------------------------------|---------------|--------------|------------|--------|-------------------|-------------------------|---------------------------------|----------------------------------------------|------------------------------------------|------------------|--------------------|--------------------|--------------------|--------------------|------------------------|------------------------|------------------------|------------------------|
| 1572 | Q9Y3E5    | Peptidyl-tRNA hydrolase 2, mitochondrial [OS=Homo sapiens]                                           | 17.5          | 25           | 2          | 89     | 2                 | 442                     | 83                              | 2                                            | 2                                        | 0                | 6.39E+07           | 6.71E+07           | 4.31E+07           | 6.73E+07           | 9.25E+07               | 9.36E+07               | 7.30E+07               | 7.54E+07               |
| 1573 | Q96GG9    | DCN1-like protein 1 [OS=Homo sapiens]                                                                | 17.4          | 11           | 2          | 68     | 2                 | 2047                    | 89                              | 2                                            | 2                                        | 0                | 3.32E+07           | 3.45E+07           | 2.92E+07           | 3.52E+07           | 3.93E+07               | 4.35E+07               | 3.37E+07               | 3.66E+07               |
| 1574 | Q14157-2  | Ubiquitin-associated protein 2-like [OS=Homo sapiens]                                                | 17.4          | 4            | 3          | 94     | 3                 | 966                     | 89                              | 3                                            | 3                                        | 0                | 8.03E+07           | 9.01E+07           | 7.73E+07           | 8.91E+07           | 8.30E+07               | 7.74E+07               | 2.47E+07               | 8.10E+07               |
| 1575 | Q96RT1    | Erbin [OS=Homo sapiens]                                                                              | 17.4          | 3            | 3          | 24     | 3                 | 246                     | 9                               | 3                                            | 3                                        | 0                | 2.44E+07           | 2.15E+07           | 2.03E+07           | 2.15E+07           | 3.33E+07               | 3.11E+07               | 2.93E+07               | 4.00E+07               |
| 1576 | P46926    | glucosamine-6-phosphate isomerase 1 [OS=Homo sapiens]                                                | 17.4          | 10           | 2          | 48     | 2                 | 828                     | 66                              | 2                                            | 2                                        | 0                | 4.78E+07           | 4.80E+07           | 4.83E+07           | 4.49E+07           | 7.78E+07               | 7.56E+07               | 6.29E+07               | 7.51E+07               |
| 1577 | Q96IX5    | Up-regulated during skeletal muscle growth protein 5 [OS=Homo sapiens]                               | 17.4          | 28           | 2          | 44     | 2                 | 2661                    |                                 |                                              | 2                                        | 0                | 1.20E+08           | 1.17E+08           | 1.27E+08           | 1.28E+08           | 1.01E+08               | 1.45E+08               | 1.42E+08               | 9.55E+07               |
| 1578 | Q6IBS0    | Twinfilin-2 [OS=Homo sapiens]                                                                        | 17.4          | 11           | 2          | 16     | 2                 | 179                     | 15                              | 2                                            | 2                                        | 0                | 2.81E+07           | 1.29E+07           | 2.03E+07           | 3.71E+07           | 2.64E+07               | 2.80E+07               | 3.08E+07               | 2.55E+07               |
| 1579 | P47914    | 60S ribosomal protein L29 [OS=Homo sapiens]                                                          | 17.3          | 14           | 2          | 194    | 2                 | 2230                    | 207                             | 2                                            | 2                                        | 0                | 1.66E+08           | 1.48E+08           | 1.66E+08           | 1.70E+08           | 1.23E+08               | 1.33E+08               | 1.55E+08               | 1.39E+08               |
| 1580 | Q9NP73-1  | Putative bifunctional UDP-N-acetylglucosamine transferase and deubiquitinase ALG13 [OS=Homo sapiens] | 17.3          | 2            | 2          | 31     | 2                 | 299                     | 13                              | 2                                            | 2                                        | 0                | 2.42E+07           | 2.22E+07           | 2.19E+07           | 2.08E+07           | 2.80E+07               | 2.81E+07               | 2.67E+07               | 2.94E+07               |
| 1581 | Q9P015    | 39S ribosomal protein L15, mitochondrial [OS=Homo sapiens]                                           | 17.3          | 14           | 3          | 22     | 3                 | 146                     | 26                              | 3                                            | 3                                        | 0                | 7.00E+07           | 7.60E+07           | 7.87E+07           | 7.47E+07           | 6.70E+07               | 5.93E+07               | 5.72E+07               | 7.10E+07               |
| 1582 | Q99459    | Cell division cycle 5-like protein [OS=Homo sapiens]                                                 | 17.3          | 6            | 3          | 44     | 3                 | 418                     | 42                              | 3                                            | 3                                        | 0                | 4.93E+07           | 5.61E+07           | 5.06E+07           | 4.93E+07           | 5.39E+07               | 5.53E+07               | 4.66E+07               | 5.47E+07               |
| 1583 | Q92769    | Histone deacetylase 2 [OS=Homo sapiens]                                                              | 17.3          | 9            | 4          | 92     | 3                 | 499                     | 89                              | 4                                            | 3                                        | 1                | 2.10E+08           | 2.11E+08           | 2.08E+08           | 2.14E+08           | 2.15E+08               | 2.08E+08               | 2.21E+08               | 2.03E+08               |
| 1584 | O75663    | TIP41-like protein [OS=Homo sapiens]                                                                 | 17.3          | 16           | 3          | 52     | 3                 | 535                     | 52                              | 3                                            | 3                                        | 0                | 3.47E+07           | 3.51E+07           | 3.35E+07           | 3.29E+07           | 3.80E+07               | 3.91E+07               | 4.11E+07               | 4.21E+07               |
| 1585 | O00165    | HCLS1-associated protein X-1 [OS=Homo sapiens]                                                       | 17.2          | 16           | 3          | 92     | 3                 | 977                     | 70                              | 3                                            | 3                                        | 0                | 5.71E+07           | 5.65E+07           | 5.41E+07           | 5.71E+07           | 3.55E+07               | 3.88E+07               | 4.04E+07               | 4.07E+07               |
| 1586 | O43660-1  | Pleiotropic regulator 1 [OS=Homo sapiens]                                                            | 17.1          | 7            | 2          | 50     | 2                 | 234                     | 72                              | 2                                            | 2                                        | 0                | 4.41E+07           | 4.93E+07           | 5.17E+07           | 5.46E+07           | 4.90E+07               | 5.14E+07               | 5.08E+07               | 5.69E+07               |
| 1587 | Q9BUK6    | Protein misato homolog 1 [OS=Homo sapiens]                                                           | 17.1          | 9            | 2          | 18     | 2                 | 117                     | 15                              | 2                                            | 2                                        | 0                | 2.11E+07           | 2.12E+07           | 1.45E+07           | 2.69E+07           | 2.61E+06               | 8.14E+06               | 2.63E+06               | 3.49E+06               |
| 1588 | Q9BTW9    | Tubulin-specific chaperone D [OS=Homo sapiens]                                                       | 17.1          | 5            | 3          | 13     | 3                 | 164                     | 10                              | 3                                            | 2                                        | 0                | 1.72E+07           | 7.02E+06           | 1.16E+07           | 1.03E+07           | 2.97E+06               | 1.73E+06               | 7.28E+06               | 1.11E+07               |
| 1589 | O14617-1  | AP-3 complex subunit delta-1 [OS=Homo sapiens]                                                       | 17.0          | 3            | 2          | 54     | 2                 | 455                     | 49                              | 2                                            | 2                                        | 0                | 8.20E+06           | 9.99E+06           | 6.06E+06           | 2.11E+07           | 2.49E+07               | 2.57E+07               | 2.22E+07               | 2.38E+07               |
| 1590 | P33240    | cleavage stimulation factor subunit 2 [OS=Homo sapiens]                                              | 17.0          | 7            | 2          | 52     | 2                 | 744                     | 63                              | 2                                            | 2                                        | 0                | 4.66E+07           | 4.39E+07           | 4.53E+07           | 4.56E+07           | 4.64E+07               | 4.29E+07               | 4.00E+07               | 4.40E+07               |
| 1591 | P18077    | 60S ribosomal protein L35a [OS=Homo sapiens]                                                         | 17.0          | 24           | 5          | 100    | 5                 | 115                     | 31                              | 5                                            | 5                                        | 0                | 6.94E+08           | 6.30E+08           | 5.67E+08           | 7.02E+08           | 4.48E+08               | 4.48E+08               | 4.45E+08               | 4.00E+08               |
| 1592 | Q15041    | ADP-ribosylation factor-like protein 6-interacting protein 1 [OS=Homo sapiens]                       | 17.0          | 19           | 2          | 82     | 2                 | 185                     | 91                              | 2                                            | 2                                        | 0                | 1.15E+08           | 9.73E+07           | 1.10E+08           | 1.22E+08           | 1.03E+08               | 1.03E+08               | 1.30E+08               | 1.07E+08               |
| 1593 | Q8WUF5    | RelA-associated inhibitor [OS=Homo sapiens]                                                          | 16.9          | 7            | 3          | 10     | 3                 | 54                      | 13                              | 3                                            | 3                                        | 0                | 2.44E+07           | 3.64E+07           | 3.41E+07           | 3.66E+07           | 2.24E+07               | 1.21E+07               | 2.00E+06               | 9.65E+06               |
| 1594 | P61020    | Ras-related protein Rab-5B [OS=Homo sapiens]                                                         | 16.9          | 16           | 3          | 94     | 1                 | 637                     | 124                             | 3                                            | 3                                        | 0                | 4.89E+07           | 4.58E+07           | 6.48E+07           | 3.19E+07           | 2.54E+07               | 3.19E+07               | 1.44E+07               | 3.16E+07               |
| 1595 | O94919    | endonuclease domain-containing 1 protein [OS=Homo sapiens]                                           | 16.9          | 9            | 4          | 15     | 4                 | 72                      | 5                               | 4                                            | 4                                        | 0                | 5.88E+07           | 5.55E+07           | 5.17E+07           | 6.20E+07           | 5.79E+07               | 5.54E+07               | 5.42E+07               | 5.58E+07               |
| 1596 | Q9H4A6    | Golgi phosphoprotein 3 [OS=Homo sapiens]                                                             | 16.9          | 13           | 2          | 60     | 2                 | 550                     | 13                              | 2                                            | 2                                        | 0                | 1.26E+07           | 1.62E+07           | 1.68E+07           | 1.39E+07           | 1.01E+07               | 1.20E+07               | 2.13E+07               | 1.22E+07               |
| 1597 | P50336    | protoporphyrinogen oxidase [OS=Homo sapiens]                                                         | 16.8          | 10           | 2          | 54     | 2                 | 758                     | 78                              | 2                                            | 2                                        | 0                | 2.86E+07           | 2.63E+07           | 1.48E+07           | 2.70E+07           | 3.13E+07               | 3.01E+07               | 2.73E+07               | 3.16E+07               |
| 1598 | Q5BJD5-1  | Transmembrane protein 41B [OS=Homo sapiens]                                                          | 16.8          | 7            | 1          | 43     | 1                 | 183                     | 15                              | 1                                            | 1                                        | 0                | 5.89E+06           | 5.53E+06           | 6.83E+06           | 5.20E+06           | 4.34E+06               | 5.20E+06               | 5.30E+06               | 5.07E+06               |
| 1599 | Q9Y2W2    | WW domain-binding protein 11 [OS=Homo sapiens]                                                       | 16.8          | 10           | 3          | 34     | 3                 | 214                     | 21                              | 3                                            | 3                                        | 0                | 3.49E+07           | 3.99E+07           | 3.80E+07           | 3.37E+07           | 4.46E+07               | 4.13E+07               | 4.43E+07               | 4.51E+07               |
| 1600 | Q9GZP4    | PITH domain-containing protein 1 [OS=Homo sapiens]                                                   | 16.8          | 29           | 4          | 32     | 4                 | 195                     | 34                              | 4                                            | 4                                        | 0                | 4.14E+07           | 4.08E+07           | 4.33E+07           | 3.56E+07           | 4.01E+07               | 4.63E+07               | 4.99E+07               | 4.55E+07               |
| 1601 | P21589-1  | 5'-nucleotidase [OS=Homo sapiens]                                                                    | 16.7          | 8            | 2          | 16     | 2                 | 157                     | 16                              | 2                                            | 2                                        | 0                | 1.10E+07           | 1.93E+07           | 1.07E+07           | 1.31E+07           | 1.54E+07               | 6.49E+06               | 3.03E+06               | 4.23E+06               |
| 1602 | Q16401    | 26S proteasome non-ATPase regulatory subunit 5 [OS=Homo sapiens]                                     | 16.7          | 13           | 5          | 15     | 5                 | 259                     | 5                               | 4                                            | 5                                        | 0                | 2.42E+07           | 3.08E+07           | 2.84E+07           | 2.58E+07           | 5.78E+07               | 5.32E+07               | 5.01E+07               | 5.36E+07               |
| 1603 | Q96HY6-1  | DDRKG domain-containing protein 1 [OS=Homo sapiens]                                                  | 16.7          | 17           | 3          | 8      | 3                 | 97                      | 9                               | 3                                            | 3                                        | 0                | 9.47E+06           | 1.21E+07           | 1.29E+07           | 1.13E+07           | 1.79E+07               | 1.78E+07               | 1.85E+07               | 2.00E+07               |
| 1604 | Q14320    | Protein FAM50A [OS=Homo sapiens]                                                                     | 16.7          | 9            | 2          | 43     | 2                 | 369                     | 40                              | 2                                            | 2                                        | 0                | 3.17E+07           | 2.47E+07           | 3.24E+07           | 1.91E+07           | 3.45E+07               | 3.68E+07               | 3.44E+07               | 3.68E+07               |
| 1605 | Q9Y3B4    | Splicing factor 3B subunit 6 [OS=Homo sapiens]                                                       | 16.7          | 11           | 1          | 48     | 1                 | 376                     | 55                              | 1                                            | 1                                        | 0                | 3.35E+07           | 3.12E+07           | 3.27E+07           | 3.93E+07           | 3.87E+07               | 3.56E+07               | 3.68E+07               | 3.42E+07               |
| 1606 | O75351    | Vacuolar protein sorting-associated protein 4B [OS=Homo sapiens]                                     | 16.6          | 9            | 2          | 94     | 2                 | 1010                    | 67                              | 2                                            | 2                                        | 0                | 2.75E+07           | 2.44E+07           | 2.23E+07           | 2.48E+07           | 4.12E+07               | 3.57E+07               | 4.18E+07               | 3.80E+07               |
| 1607 | O60869-1  | Endothelial differentiation-related factor 1 [OS=Homo sapiens]                                       | 16.6          | 10           | 1          | 50     | 1                 | 615                     | 68                              | 1                                            | 1                                        | 0                | 6.66E+07           | 6.02E+07           | 6.72E+07           | 7.57E+07           | 8.04E+07               | 7.00E+07               | 7.68E+07               | 7.45E+07               |
| 1608 | P47755    | F-actin-capping protein subunit alpha-2 [OS=Homo sapiens]                                            | 16.6          | 12           | 3          | 81     | 1                 | 1042                    | 114                             | 3                                            | 2                                        | 0                | 3.36E+07           | 2.03E+07           | 2.97E+07           | 3.25E+07           | 3.97E+07               | 3.52E+07               | 1.50E+07               | 3.50E+07               |
| 1609 | P09110-1  | 3-ketoacyl-CoA thiolase, peroxisomal [OS=Homo sapiens]                                               | 16.6          | 9            | 2          | 80     | 2                 | 905                     | 18                              | 2                                            | 2                                        | 0                | 8.97E+06           | 1.58E+07           | 1.46E+07           | 1.57E+07           | 1.09E+07               | 1.05E+07               | 9.17E+06               | 8.65E+06               |
| 1610 | Q9UDW1    | cytochrome b-c1 complex subunit 9 [OS=Homo sapiens]                                                  | 16.6          | 25           | 2          | 78     | 2                 | 591                     | 10                              | 1                                            | 2                                        | 0                | 6.07E+07           | 4.58E+07           | 3.79E+07           | 4.49E+07           | 3.20E+07               | 4.21E+07               | 4.12E+07               | 3.36E+07               |
| 1611 | Q96T88    | E3 ubiquitin-protein ligase UHRF1 [OS=Homo sapiens]                                                  | 16.5          | 6            | 4          | 70     | 4                 | 569                     | 28                              | 4                                            | 4                                        | 0                | 6.02E+07           | 6.15E+07           | 6.29E+07           | 6.50E+07           | 6.33E+07               | 5.97E+07               | 5.47E+07               | 5.87E+07               |
| 1612 | Q9ULA0    | Aspartyl aminopeptidase [OS=Homo sapiens]                                                            | 16.5          | 12           | 3          | 19     | 3                 | 57                      | 9                               | 3                                            | 3                                        | 0                | 2.05E+07           | 9.18E+06           | 1.36E+07           | 1.17E+07           | 2.35E+06               | 2.12E+07               | 2.10E+07               |                        |
| 1613 | P08559    | Pyruvate dehydrogenase E1 component subunit alpha, somatic form, mitochondrial [OS=Homo sapiens]     | 16.5          | 20           | 5          | 24     | 5                 | 54                      | 14                              | 5                                            | 5                                        | 0                | 3.33E+07           | 3.90E+07           | 3.34E+07           | 2.92E+07           | 5.10E+07               | 3.79E+07               | 1.01E+08               | 3.45E+07               |
| 1614 | Q15050    | Ribosome biogenesis regulatory protein homolog [OS=Homo sapiens]                                     | 16.5          | 17           | 3          | 50     | 3                 | 189                     | 47                              | 3                                            | 2                                        | 0                | 6.23E+07           | 8.19E+07           | 8.15E+07           | 7.78E+07           | 1.14E+08               | 8.47E+07               | 9.43E+07               | 8.78E+07               |
| 1615 | Q99447-1  | ethanolamine-phosphate cytidylyltransferase [OS=Homo sapiens]                                        | 16.5          | 9            | 2          | 80     | 2                 | 950                     | 68                              | 2                                            | 2                                        | 0                | 2.80E+07           | 2.87E+07           | 2.85E+07           | 2.75E+07           | 1.71E+07               | 1.71E+07               | 1.56E+07               | 1.63E+07               |
| 1616 | O95456    | Proteasome assembly chaperone 1 [OS=Homo sapiens]                                                    | 16.4          | 19           | 3          | 26     | 3                 | 189                     | 13                              | 2                                            | 3                                        | 0                | 1.09E+07           | 7.31E+06           | 9.91E+06           | 1.35E+07           | 3.13E+07               | 2.10E+07               | 2.59E+07               | 2.33E+07               |
| 1617 | Q96D17    | U5 small nuclear ribonucleoprotein 40 kDa protein [OS=Homo sapiens]                                  | 16.4          | 15           | 3          | 45     | 3                 | 80                      | 9                               | 3                                            | 3                                        | 0                | 4.44E+07           | 3.82E+07           | 4.54E+07           | 4.41E+07           | 4.23E+07               | 4.35E+07               | 4.69E+07               | 4.50E+07               |
| 1618 | Q15003    | Condensin complex subunit 2 [OS=Homo sapiens]                                                        | 16.4          | 6            | 2          | 68     | 2                 | 1172                    | 103                             | 2                                            | 2                                        | 0                | 3.09E+07           | 1.53E+07           | 1.39E+07           | 2.74E+07           | 3.15E+07               | 1.24E+07               | 1.14E+07               | 2.99E+07               |
| 1619 | Q9P0J7    | E3 ubiquitin-protein ligase KCMF1 [OS=Homo sapiens]                                                  | 16.4          | 4            | 1          | 47     | 1                 | 1035                    | 57                              | 1                                            | 1                                        | 0                | 8.83E+06           | 9.26E+06           | 7.61E+06           | 8.38E+06           | 1.59E+07               | 1.29E+07               | 1.17E+07               | 1.42E+07               |
| 1620 | Q96CT7    | Coiled-coil domain-containing protein 124 [OS=Homo sapiens]                                          | 16.4          | 16           | 2          | 37     | 2                 | 298                     | 50                              | 2                                            | 2                                        | 0                | 4.27E+06           | 7.68E+07           | 6.16E+07           | 6.31E+07           | 9.04E+07               | 8.99E+07               | 8.03E+07               | 1.28E+07               |
| 1621 | Q15785    | Mitochondrial import receptor subunit TOM34 [OS=Homo sapiens]                                        | 16.3          | 11           | 2          | 49     | 2                 | 567                     | 30                              | 2                                            | 2                                        | 0                | 3.26E+07           | 3.21E+07           | 2.87E+07           | 3.25E+07           | 4.36E+07               | 3.31E+07               | 3.59E+07               | 4.11E+07               |
| 1622 | Q86XP3-1  | ATP-dependent RNA helicase DDX42 [OS=Homo sapiens]                                                   | 16.3          | 7            | 5          | 39     | 5                 | 88                      | 10                              | 5                                            | 5                                        | 0                | 2.23E+07           | 6.71E+07           | 6.76E+07           | 2.68E+07           | 5.94E+07               | 1.84E+07               | 2.45E+07               | 2.14E+07               |
| 1623 | P49750-4  | Isoform 4 of YLP motif-containing protein 1 [OS=Homo sapiens]                                        | 16.3          | 4            | 5          | 53     | 5                 | 139                     | 11                              | 5                                            | 5                                        | 0                | 5.81E+07           | 7.07E+07           | 6.93E+07           | 7.44E+07           | 7.46E+07               | 9.64E+07               | 9.77E+07               | 9.13E+07               |
| 1624 | Q9UJ70    | N-acetyl-D-glucosamine kinase [OS=Homo sapiens]                                                      | 16.2          | 14           | 3          | 20     | 3                 | 119                     | 28                              | 3                                            | 2                                        | 0                | 3.28E+07           | 3.34E+07           | 4.96E+07           | 3.34E+07           | 1.73E+07               | 2.27E+07               | 2.79E+07               | 1.81E+07               |
| 1625 | Q13618    | Cullin-3 [OS=Homo sapiens]                                                                           | 16.1          | 6            | 3          | 34     | 3                 | 337                     | 30                              | 3                                            | 3                                        | 0                | 3.25E+07           | 3.55E+07           | 3.19E+07           | 2.94E+07           | 2.67E+07               | 3.62E+07               | 3.35E+07               | 3.49E+07               |

| No.  | Accession | Description                                                                                   | Sum PEP Score | Coverage [%] | # Peptides | # PSMs | # Unique Peptides | Score Mascot: A5 Mascot | Score Sequest HT: A2 Sequest HT | # Peptides (by Search Engine): A2 Sequest HT | # Peptides (by Search Engine): A5 Mascot | # Razor Peptides | ctrl Abundance s_1 | ctrl Abundance s_2 | ctrl Abundance s_3 | ctrl Abundance s_4 | JAM-A KO Abundance s_1 | JAM-A KO Abundance s_2 | JAM-A KO Abundance s_3 | JAM-A KO Abundance s_4 |
|------|-----------|-----------------------------------------------------------------------------------------------|---------------|--------------|------------|--------|-------------------|-------------------------|---------------------------------|----------------------------------------------|------------------------------------------|------------------|--------------------|--------------------|--------------------|--------------------|------------------------|------------------------|------------------------|------------------------|
| 1626 | Q8TDD1    | ATP-dependent RNA helicase DDX54 [OS=Homo sapiens]                                            | 16.1          | 7            | 3          | 50     | 3                 | 115                     | 15                              | 3                                            | 3                                        | 0                | 2.99.E+07          | 3.05.E+07          | 2.15.E+07          | 3.14.E+07          | 1.09.E+07              | 1.40.E+07              | 1.81.E+07              | 1.40.E+07              |
| 1627 | O00483    | Cytochrome c oxidase subunit NDUF44 [OS=Homo sapiens]                                         | 16.1          | 53           | 3          | 47     | 3                 | 223                     | 40                              | 3                                            | 3                                        | 0                | 1.61.E+08          | 1.58.E+08          | 1.58.E+08          | 1.56.E+08          | 1.35.E+08              | 1.30.E+08              | 1.45.E+08              | 1.40.E+08              |
| 1628 | Q9NX14-1  | NADH dehydrogenase [ubiquinone] 1 beta subcomplex subunit 11, mitochondrial [OS=Homo sapiens] | 16.1          | 22           | 2          | 24     | 2                 | 169                     | 42                              | 2                                            | 2                                        | 0                | 4.20.E+07          | 4.21.E+07          | 4.42.E+07          | 5.65.E+07          | 6.47.E+07              | 6.33.E+07              | 6.12.E+07              | 6.09.E+07              |
| 1629 | Q9HCN8    | Stromal cell-derived factor 2-like protein 1 [OS=Homo sapiens]                                | 16.0          | 22           | 2          | 34     | 2                 | 69                      | 43                              | 2                                            | 2                                        | 0                | 7.93.E+07          | 5.86.E+07          | 7.22.E+07          | 3.64.E+07          | 6.26.E+07              | 4.32.E+07              | 4.42.E+07              | 6.23.E+07              |
| 1630 | Q13428-1  | Treacle protein [OS=Homo sapiens]                                                             | 16.0          | 3            | 3          | 20     | 3                 | 107                     | 14                              | 3                                            | 3                                        | 0                | 1.93.E+07          | 3.64.E+07          | 2.69.E+07          | 1.99.E+07          | 2.48.E+07              | 1.18.E+07              | 6.75.E+07              | 1.24.E+07              |
| 1631 | P62857    | 40S ribosomal protein S28 [OS=Homo sapiens]                                                   | 16.0          | 30           | 2          | 214    | 2                 | 4559                    | 326                             | 2                                            | 2                                        | 0                | 6.97.E+08          | 7.44.E+08          | 6.87.E+08          | 7.67.E+08          | 7.13.E+08              | 6.96.E+08              | 5.67.E+08              | 6.86.E+08              |
| 1632 | Q13557    | Calcium/calmodulin-dependent protein kinase type II subunit delta [OS=Homo sapiens]           | 16.0          | 10           | 4          | 29     | 4                 | 247                     | 27                              | 4                                            | 3                                        | 0                | 7.72.E+07          | 6.72.E+07          | 6.92.E+07          | 8.90.E+07          | 6.80.E+07              | 8.69.E+07              | 6.48.E+07              | 9.51.E+07              |
| 1633 | P09012    | U1 SMALL NUCLEAR RIBONUCLEOPROTEIN A [OS=Homo sapiens]                                        | 16.0          | 13           | 3          | 156    | 2                 | 1127                    | 115                             | 2                                            | 3                                        | 1                | 2.35.E+08          | 2.42.E+08          | 2.50.E+08          | 2.12.E+08          | 2.45.E+08              | 2.47.E+08              | 2.56.E+08              | 2.39.E+08              |
| 1634 | Q00765    | Receptor expression-enhancing protein 5 [OS=Homo sapiens]                                     | 15.9          | 15           | 4          | 71     | 4                 | 165                     | 42                              | 4                                            | 4                                        | 0                | 2.39.E+08          | 1.87.E+08          | 2.32.E+08          | 2.07.E+08          | 1.61.E+08              | 1.96.E+08              | 2.25.E+08              | 1.88.E+08              |
| 1635 | P42785-1  | lysosomal Pro-X carboxypeptidase [OS=Homo sapiens]                                            | 15.9          | 8            | 2          | 26     | 2                 | 159                     | 3                               | 2                                            | 2                                        | 0                | 1.32.E+07          | 1.55.E+07          | 1.38.E+07          | 1.52.E+07          | 2.26.E+07              | 1.96.E+07              | 1.67.E+07              | 1.86.E+07              |
| 1636 | Q9H074    | Polyadenylate-binding protein-interacting protein 1 [OS=Homo sapiens]                         | 15.9          | 10           | 3          | 11     | 3                 | 44                      | 13                              | 2                                            | 3                                        | 0                | 8.84.E+06          | 6.57.E+06          | 8.82.E+06          | 1.02.E+07          | 9.03.E+06              | 8.42.E+06              | 4.97.E+06              | 7.52.E+06              |
| 1637 | Q9BZE1    | 39S ribosomal protein L37, mitochondrial [OS=Homo sapiens]                                    | 15.8          | 6            | 2          | 28     | 2                 | 639                     | 32                              | 2                                            | 2                                        | 0                | 4.80.E+07          | 5.29.E+07          | 5.04.E+07          | 4.90.E+07          | 5.57.E+07              | 5.51.E+07              | 6.12.E+07              | 6.27.E+07              |
| 1638 | P41227-1  | N-alpha-acetyltransferase 10 [OS=Homo sapiens]                                                | 15.8          | 14           | 2          | 36     | 2                 | 328                     | 57                              | 2                                            | 2                                        | 0                | 7.02.E+07          | 3.96.E+07          | 6.62.E+07          | 7.93.E+07          | 7.17.E+07              | 6.03.E+07              | 6.46.E+07              | 6.36.E+07              |
| 1639 | Q6P1J9    | Parafibromin [OS=Homo sapiens]                                                                | 15.8          | 7            | 3          | 43     | 3                 | 299                     | 41                              | 2                                            | 3                                        | 0                | 2.07.E+07          | 1.99.E+07          | 1.19.E+07          | 2.88.E+07          | 2.26.E+07              | 2.60.E+07              | 1.87.E+07              | 2.82.E+07              |
| 1640 | Q9Y5L0-2  | transportin-3 [OS=Homo sapiens]                                                               | 15.7          | 7            | 3          | 54     | 3                 | 845                     | 73                              | 3                                            | 2                                        | 0                | 5.60.E+07          | 1.86.E+07          | 3.16.E+07          | 1.84.E+07          | 1.38.E+07              | 2.28.E+07              | 2.83.E+07              | 2.95.E+07              |
| 1641 | P06454-1  | Prothymosin alpha [OS=Homo sapiens]                                                           | 15.7          | 24           | 2          | 181    | 2                 | 8224                    | 0                               | 1                                            | 2                                        | 0                | 3.75.E+08          | 4.54.E+08          | 4.31.E+08          | 3.65.E+08          | 5.39.E+08              | 4.60.E+08              | 4.11.E+08              | 3.44.E+08              |
| 1642 | Q13630    | GDP-L-fucose synthase [OS=Homo sapiens]                                                       | 15.7          | 13           | 3          | 14     | 3                 | 57                      | 13                              | 3                                            | 3                                        | 0                | 7.81.E+07          | 7.01.E+07          | 6.70.E+07          | 6.71.E+07          | 6.82.E+07              | 7.36.E+07              | 6.88.E+07              | 6.18.E+07              |
| 1643 | Q16643    | drebrin [OS=Homo sapiens]                                                                     | 15.6          | 8            | 3          | 29     | 3                 | 291                     | 18                              | 3                                            | 3                                        | 0                | 2.57.E+07          | 2.56.E+07          | 3.23.E+07          | 2.41.E+07          | 2.81.E+07              | 2.14.E+07              | 2.82.E+07              | 2.82.E+07              |
| 1644 | Q9NVM6    | DnaJ homolog subfamily C member 17 [OS=Homo sapiens]                                          | 15.6          | 7            | 1          | 56     | 1                 | 1477                    | 93                              | 1                                            | 1                                        | 0                | 1.45.E+07          | 1.48.E+07          | 1.36.E+07          | 1.47.E+07          | 1.45.E+07              | 1.41.E+07              | 1.16.E+07              | 1.26.E+07              |
| 1645 | Q7Z7E8-1  | Ubiquitin-conjugating enzyme E2 Q1 [OS=Homo sapiens]                                          | 15.6          | 7            | 1          | 32     | 1                 | 616                     | 46                              | 1                                            | 1                                        | 0                | 1.87.E+07          | 2.26.E+07          | 1.85.E+07          | 2.38.E+07          | 2.79.E+07              | 2.76.E+07              | 2.36.E+07              | 2.74.E+07              |
| 1646 | P29353    | SHC-transforming protein 1 [OS=Homo sapiens]                                                  | 15.6          | 4            | 1          | 90     | 1                 | 2751                    | 166                             | 1                                            | 1                                        | 0                | 3.27.E+07          | 1.97.E+07          | 2.90.E+07          | 2.30.E+07          | 2.70.E+07              | 1.61.E+07              | 1.38.E+07              | 1.63.E+07              |
| 1647 | Q96GC9    | Vacuole membrane protein 1 [OS=Homo sapiens]                                                  | 15.6          | 7            | 1          | 40     | 1                 | 640                     | 60                              | 1                                            | 1                                        | 0                | 1.44.E+07          | 1.60.E+07          | 1.19.E+07          | 1.38.E+07          | 3.09.E+07              | 2.73.E+07              | 2.57.E+07              | 3.07.E+07              |
| 1648 | Q15651-1  | High mobility group nucleosome-binding domain-containing protein 3 [OS=Homo sapiens]          | 15.6          | 15           | 1          | 63     | 1                 | 54                      | 40                              | 1                                            | 1                                        | 0                | 2.65.E+07          | 2.57.E+07          | 2.82.E+07          | 2.33.E+07          | 1.47.E+07              | 1.62.E+07              | 1.62.E+07              | 1.54.E+07              |
| 1649 | P17676    | CCAAT/enhancer-binding protein beta [OS=Homo sapiens]                                         | 15.6          | 5            | 1          | 34     | 1                 | 636                     | 50                              | 1                                            | 1                                        | 0                | 7.58.E+06          | 7.67.E+06          | 7.06.E+06          | 7.31.E+06          | 1.44.E+07              | 1.33.E+07              | 1.29.E+07              | 1.43.E+07              |
| 1650 | P60602-1  | Reactive oxygen species modulator 1 [OS=Homo sapiens]                                         | 15.6          | 22           | 1          | 39     | 1                 | 2796                    | 106                             | 1                                            | 1                                        | 0                | 8.91.E+07          | 9.36.E+07          | 8.69.E+07          | 9.20.E+07          | 1.06.E+08              | 1.08.E+08              | 9.79.E+07              | 9.91.E+07              |
| 1651 | O76071    | Probable cytosolic iron-sulfur protein assembly protein Ciao1 [OS=Homo sapiens]               | 15.5          | 14           | 3          | 25     | 3                 | 386                     | 30                              | 3                                            | 2                                        | 0                | 7.73.E+07          | 5.65.E+07          | 3.85.E+07          | 7.59.E+07          | 3.00.E+07              | 4.63.E+07              | 4.10.E+07              | 3.90.E+07              |
| 1652 | P36954    | DNA-directed RNA polymerase II subunit RPB9 [OS=Homo sapiens]                                 | 15.5          | 18           | 1          | 26     | 1                 | 835                     | 51                              | 1                                            | 1                                        | 0                | 2.40.E+07          | 1.93.E+07          | 1.92.E+07          | 2.53.E+07          | 2.22.E+07              | 2.36.E+07              | 1.86.E+07              | 2.24.E+07              |
| 1653 | Q15643    | Thyroid receptor-interacting protein 11 [OS=Homo sapiens]                                     | 15.4          | 3            | 2          | 14     | 2                 | 54                      | 14                              | 2                                            | 2                                        | 0                | 1.35.E+06          | 2.12.E+07          | 1.89.E+06          | 2.02.E+07          | 2.88.E+07              | 1.79.E+07              | 1.89.E+07              | 2.60.E+07              |
| 1654 | Q8WVC0-1  | RNA polymerase-associated protein LEO1 [OS=Homo sapiens]                                      | 15.4          | 6            | 3          | 47     | 3                 | 258                     | 4                               | 3                                            | 3                                        | 0                | 2.43.E+07          | 2.47.E+07          | 2.42.E+07          | 2.34.E+07          | 3.00.E+07              | 2.71.E+07              | 2.52.E+07              | 2.91.E+07              |
| 1655 | Q9H3N1    | Thioredoxin-related transmembrane protein 1 [OS=Homo sapiens]                                 | 15.3          | 17           | 4          | 84     | 4                 | 102                     | 36                              | 4                                            | 4                                        | 0                | 8.36.E+07          | 9.43.E+07          | 8.97.E+07          | 8.78.E+07          | 1.17.E+08              | 1.38.E+08              | 1.02.E+08              | 1.28.E+08              |
| 1656 | Q8WVJ2    | NudC domain-containing protein 2 [OS=Homo sapiens]                                            | 15.3          | 11           | 1          | 4      | 1                 | 144                     | 6                               | 1                                            | 1                                        | 0                | 3.43.E+06          | 5.10.E+06          | 6.34.E+06          | 6.28.E+06          | 5.95.E+06              | 1.09.E+07              | 1.20.E+07              | 8.62.E+06              |
| 1657 | P56134    | ATP synthase subunit f, mitochondrial [OS=Homo sapiens]                                       | 15.3          | 26           | 2          | 114    | 2                 | 1204                    | 119                             | 2                                            | 2                                        | 0                | 9.63.E+07          | 1.24.E+08          | 8.20.E+07          | 1.09.E+08          | 1.23.E+08              | 1.30.E+08              | 9.88.E+07              | 1.17.E+08              |
| 1658 | Q92504    | Zinc transporter SLC39A7 [OS=Homo sapiens]                                                    | 15.3          | 10           | 2          | 47     | 2                 | 681                     | 65                              | 2                                            | 1                                        | 0                | 2.81.E+07          | 2.62.E+07          | 2.42.E+07          | 1.71.E+07          | 3.58.E+07              | 2.96.E+07              | 2.47.E+07              | 2.97.E+07              |
| 1659 | Q96HQ2-1  | CDKN2AIP N-terminal-like protein [OS=Homo sapiens]                                            | 15.3          | 16           | 1          | 6      | 1                 | 164                     | 10                              | 1                                            | 1                                        | 0                |                    |                    |                    |                    |                        |                        |                        |                        |
| 1660 | Q13404    | Ubiquitin-conjugating enzyme E2 variant 1 [OS=Homo sapiens]                                   | 15.3          | 28           | 5          | 116    | 5                 | 638                     | 95                              | 5                                            | 5                                        | 0                | 3.26.E+08          | 3.17.E+08          | 3.45.E+08          | 2.98.E+08          | 4.63.E+08              | 4.55.E+08              | 4.98.E+08              | 4.47.E+08              |
| 1661 | Q16831    | uridine phosphorylase 1 [OS=Homo sapiens]                                                     | 15.2          | 13           | 3          | 21     | 3                 | 166                     | 6                               | 2                                            | 3                                        | 0                | 5.36.E+06          | 2.49.E+07          | 2.51.E+07          | 6.12.E+06          | 2.38.E+07              | 2.37.E+07              | 2.47.E+07              | 4.30.E+06              |
| 1662 | Q9BV86-1  | N-terminal Xaa-Pro-Lys N-methyltransferase 1 [OS=Homo sapiens]                                | 15.2          | 16           | 3          | 25     | 3                 | 255                     | 10                              | 2                                            | 3                                        | 0                | 2.16.E+07          | 2.69.E+07          | 2.48.E+07          | 2.01.E+07          | 2.57.E+07              | 2.88.E+07              | 2.04.E+07              | 2.22.E+07              |
| 1663 | P46087    | Probable 28S rRNA (cytosine(4447)-C(5))-methyltransferase [OS=Homo sapiens]                   | 15.1          | 9            | 3          | 65     | 3                 | 110                     | 79                              | 3                                            | 3                                        | 0                | 1.18.E+07          | 8.96.E+06          | 1.41.E+07          | 1.66.E+07          | 1.05.E+06              | 4.38.E+06              | 7.59.E+06              | 4.53.E+06              |
| 1664 | Q8WW12    | PEST proteolytic signal-containing nuclear protein [OS=Homo sapiens]                          | 15.1          | 21           | 3          | 39     | 3                 | 586                     | 36                              | 3                                            | 3                                        | 0                | 2.87.E+07          | 2.67.E+07          | 3.05.E+07          | 3.21.E+07          | 2.98.E+07              | 3.30.E+07              | 3.69.E+07              | 3.17.E+07              |
| 1665 | Q9NUQ9    | protein FAM49B [OS=Homo sapiens]                                                              | 15.1          | 21           | 3          | 42     | 3                 | 194                     | 33                              | 3                                            | 3                                        | 0                | 2.13.E+07          | 3.46.E+07          | 2.35.E+07          | 1.83.E+07          | 5.47.E+07              | 5.36.E+07              | 5.61.E+07              | 5.65.E+07              |
| 1666 | Q8NFF5    | FAD synthase [OS=Homo sapiens]                                                                | 15.0          | 7            | 2          | 30     | 2                 | 507                     | 16                              | 2                                            | 2                                        | 0                | 2.36.E+07          | 2.37.E+07          | 2.32.E+07          | 2.85.E+07          | 1.32.E+07              | 1.15.E+07              | 1.32.E+07              | 1.47.E+07              |
| 1667 | P46939    | Utrophin [OS=Homo sapiens]                                                                    | 15.0          | 2            | 3          | 42     | 3                 | 444                     | 46                              | 3                                            | 3                                        | 0                | 1.25.E+07          | 1.91.E+07          | 1.26.E+07          | 1.47.E+07          | 2.21.E+07              | 1.59.E+07              | 1.15.E+07              | 1.68.E+07              |
| 1668 | Q96HR8    | H/ACA ribonucleoprotein complex non-core subunit NAF1 [OS=Homo sapiens]                       | 15.0          | 6            | 2          | 39     | 2                 | 253                     | 12                              | 2                                            | 2                                        | 0                | 1.12.E+07          | 1.30.E+07          | 1.01.E+07          | 1.27.E+07          | 1.06.E+07              | 9.50.E+06              | 7.48.E+06              | 1.01.E+07              |
| 1669 | P09234    | U1 small nuclear ribonucleoprotein C [OS=Homo sapiens]                                        | 15.0          | 11           | 1          | 22     | 1                 | 537                     | 33                              | 1                                            | 1                                        | 0                | 4.57.E+07          | 4.81.E+07          | 4.31.E+07          | 4.43.E+07          | 5.68.E+07              | 5.45.E+07              | 5.60.E+07              | 5.65.E+07              |
| 1670 | Q8N122    | Regulatory-associated protein of mTOR [OS=Homo sapiens]                                       | 15.0          | 2            | 2          | 42     | 2                 | 901                     | 42                              | 2                                            | 2                                        | 0                | 1.16.E+07          | 1.85.E+07          | 1.29.E+07          | 1.78.E+07          | 1.24.E+07              | 9.90.E+06              | 9.16.E+06              | 7.94.E+06              |
| 1671 | O00411    | DNA-directed RNA polymerase, mitochondrial [OS=Homo sapiens]                                  | 15.0          | 2            | 2          | 34     | 2                 | 267                     | 29                              | 2                                            | 2                                        | 0                | 2.00.E+07          | 2.32.E+07          | 2.01.E+07          | 2.01.E+07          | 1.01.E+07              | 7.38.E+06              | 6.02.E+06              | 9.47.E+06              |
| 1672 | P15374    | Ubiquitin carboxyl-terminal hydrolase isozyme L3 [OS=Homo sapiens]                            | 14.9          | 16           | 2          | 32     | 2                 | 415                     | 35                              | 2                                            | 2                                        | 0                | 2.33.E+07          | 1.94.E+07          | 1.67.E+07          | 1.87.E+07          | 2.62.E+07              | 2.71.E+07              | 2.81.E+07              | 2.61.E+07              |
| 1673 | O60610-1  | Protein diaphanous homolog 1 [OS=Homo sapiens]                                                | 14.9          | 2            | 2          | 18     | 2                 | 175                     | 10                              | 2                                            | 2                                        | 0                | 2.37.E+07          | 1.95.E+07          | 1.99.E+07          | 1.91.E+07          | 1.37.E+07              | 1.91.E+07              | 1.87.E+07              | 1.75.E+07              |
| 1674 | Q15424-1  | Scaffold attachment factor B1 [OS=Homo sapiens]                                               | 14.9          | 3            | 3          | 96     | 3                 | 484                     | 83                              | 3                                            | 3                                        | 0                | 9.00.E+07          | 1.32.E+08          | 1.19.E+08          | 1.20.E+08          | 1.47.E+08              | 1.35.E+08              | 1.92.E+08              | 1.51.E+08              |
| 1675 | O43678    | NADH dehydrogenase [ubiquinone] 1 alpha subcomplex subunit 2 [OS=Homo sapiens]                | 14.9          | 21           | 1          | 2      | 1                 | 93                      | 4                               | 1                                            | 1                                        | 0                | 9.92.E+06          | 1.25.E+07          | 8.75.E+06          | 8.92.E+06          | 1.13.E+07              | 1.10.E+07              | 1.14.E+07              | 1.01.E+07              |



| No.  | Accession | Description                                                                                          | Sum PEP Score | Coverage [%] | # Peptides | # PSMs | # Unique Peptides | Score Mascot: A5 Mascot | Score Sequest HT: A2 Sequest HT | # Peptides (by Search Engine): A2 Sequest HT | # Peptides (by Search Engine): A5 Mascot | # Razor Peptides | ctrl Abundance s_1 | ctrl Abundance s_2 | ctrl Abundance s_3 | ctrl Abundance s_4 | JAM-A KO Abundance s_1 | JAM-A KO Abundance s_2 | JAM-A KO Abundance s_3 | JAM-A KO Abundance s_4 |
|------|-----------|------------------------------------------------------------------------------------------------------|---------------|--------------|------------|--------|-------------------|-------------------------|---------------------------------|----------------------------------------------|------------------------------------------|------------------|--------------------|--------------------|--------------------|--------------------|------------------------|------------------------|------------------------|------------------------|
| 1676 | Q96A49    | Synapse-associated protein 1 [OS=Homo sapiens]                                                       | 14.9          | 9            | 2          | 30     | 2                 | 239                     | 34                              | 2                                            | 2                                        | 0                | 8.89.E+06          | 1.69.E+07          | 8.85.E+06          | 1.03.E+07          | 4.27.E+07              | 4.04.E+07              | 3.74.E+07              | 4.18.E+07              |
| 1677 | P26358-1  | DNA (cytosine-5)-methyltransferase 1 [OS=Homo sapiens]                                               | 14.9          | 4            | 4          | 20     | 4                 | 62                      | 24                              | 4                                            | 4                                        | 0                | 3.93.E+07          | 4.35.E+07          | 2.04.E+07          | 4.06.E+07          | 2.50.E+07              | 2.30.E+07              | 4.44.E+07              | 2.32.E+07              |
| 1678 | P13674-1  | prolyl 4-hydroxylase subunit alpha-1 [OS=Homo sapiens]                                               | 14.8          | 7            | 3          | 16     | 3                 | 157                     | 12                              | 3                                            | 3                                        | 0                | 1.32.E+07          | 1.33.E+07          | 1.51.E+07          | 1.02.E+07          | 3.04.E+07              | 2.83.E+07              | 2.86.E+07              | 2.62.E+07              |
| 1679 | Q9Y4Z0    | U6 snRNA-associated Sm-like protein LSm4 [OS=Homo sapiens]                                           | 14.8          | 17           | 2          | 36     | 2                 | 90                      | 28                              | 2                                            | 2                                        | 0                | 2.20.E+07          | 2.66.E+07          | 9.22.E+06          | 2.68.E+07          | 1.49.E+07              | 3.68.E+07              | 2.24.E+07              | 1.59.E+07              |
| 1680 | P49792    | E3 SUMO-protein ligase RanBP2 [OS=Homo sapiens]                                                      | 14.7          | 2            | 4          | 10     | 4                 | 76                      | 6                               | 4                                            | 4                                        | 0                | 2.30.E+07          | 3.15.E+07          | 2.45.E+07          | 2.70.E+07          | 2.86.E+07              | 3.51.E+07              | 2.19.E+07              | 3.29.E+07              |
| 1681 | P40222    | alpha-taxilin [OS=Homo sapiens]                                                                      | 14.7          | 10           | 2          | 10     | 2                 | 100                     | 13                              | 2                                            | 2                                        | 0                | 1.49.E+07          | 2.10.E+07          | 1.25.E+07          | 1.53.E+07          | 1.80.E+07              | 3.73.E+07              | 1.62.E+07              | 3.52.E+07              |
| 1682 | Q5J7Z9    | alanine--tRNA ligase, mitochondrial [OS=Homo sapiens]                                                | 14.7          | 4            | 2          | 18     | 2                 | 229                     | 25                              | 2                                            | 2                                        | 0                | 1.14.E+07          | 1.05.E+07          | 6.02.E+06          | 9.19.E+06          | 2.21.E+06              | 4.31.E+06              | 1.08.E+06              | 3.75.E+06              |
| 1683 | Q9Y6Y8    | SEC23-interacting protein [OS=Homo sapiens]                                                          | 14.7          | 5            | 2          | 34     | 2                 | 133                     | 51                              | 2                                            | 2                                        | 0                | 3.44.E+07          | 4.11.E+07          | 3.86.E+07          | 4.03.E+07          | 5.72.E+07              | 6.04.E+07              | 5.10.E+07              | 5.87.E+07              |
| 1684 | O75844    | caax prenyl protease 1 homolog [OS=Homo sapiens]                                                     | 14.6          | 5            | 2          | 22     | 2                 | 122                     | 25                              | 2                                            | 2                                        | 0                | 2.68.E+07          | 2.74.E+07          | 2.64.E+07          | 2.67.E+07          | 3.29.E+07              | 3.04.E+07              | 2.01.E+07              | 3.17.E+07              |
| 1685 | Q01970-1  | 1-phosphatidylinositol 4,5-bisphosphate phosphodiesterase beta-3 [OS=Homo sapiens]                   | 14.6          | 3            | 2          | 12     | 2                 | 284                     | 12                              | 2                                            | 2                                        | 0                | 5.95.E+06          | 4.85.E+06          | 6.74.E+06          | 5.01.E+06          | 8.00.E+06              | 3.16.E+06              | 1.75.E+07              | 7.92.E+06              |
| 1686 | Q9NZN4    | EH domain-containing protein 2 [OS=Homo sapiens]                                                     | 14.6          | 6            | 3          | 44     | 2                 | 384                     | 31                              | 3                                            | 3                                        | 0                | 1.79.E+07          | 1.77.E+07          | 1.88.E+07          | 1.61.E+07          | 4.03.E+06              | 9.76.E+06              | 1.10.E+07              | 7.69.E+06              |
| 1687 | Q8NCG7    | Sn1-specific diacylglycerol lipase beta [OS=Homo sapiens]                                            | 14.6          | 8            | 3          | 8      | 3                 | 94                      | 6                               | 3                                            | 3                                        | 0                | 6.31.E+06          | 8.74.E+06          | 5.71.E+06          | 8.13.E+06          | 1.20.E+07              | 8.60.E+06              | 7.98.E+06              | 8.49.E+06              |
| 1688 | P14927    | Cytochrome b-c1 complex subunit 7 [OS=Homo sapiens]                                                  | 14.6          | 52           | 3          | 22     | 3                 | 46                      | 33                              | 3                                            | 3                                        | 0                | 6.69.E+07          | 7.62.E+07          | 6.53.E+07          | 6.69.E+07          | 3.29.E+07              | 1.88.E+07              | 1.88.E+07              | 2.72.E+07              |
| 1689 | Q8WX92    | Negative elongation factor B [OS=Homo sapiens]                                                       | 14.5          | 5            | 2          | 44     | 2                 | 564                     | 37                              | 2                                            | 2                                        | 0                | 1.91.E+07          | 1.71.E+07          | 1.63.E+07          | 1.99.E+07          | 2.04.E+07              | 1.86.E+07              | 1.76.E+07              | 1.77.E+07              |
| 1690 | Q9UI26    | Importin-11 [OS=Homo sapiens]                                                                        | 14.5          | 6            | 3          | 80     | 3                 | 408                     | 13                              | 3                                            | 3                                        | 0                | 1.32.E+07          | 4.63.E+06          | 1.25.E+07          | 7.39.E+06          | 2.38.E+07              | 2.59.E+07              | 2.29.E+07              | 2.20.E+07              |
| 1691 | Q9Y3C6    | Peptidyl-prolyl cis-trans isomerase-like 1 [OS=Homo sapiens]                                         | 14.5          | 37           | 3          | 15     | 3                 | 41                      | 8                               | 2                                            | 3                                        | 0                | 6.96.E+07          | 6.28.E+07          | 6.40.E+07          | 5.85.E+07          | 7.47.E+07              | 7.39.E+07              | 8.03.E+07              | 7.53.E+07              |
| 1692 | Q8ND00    | MAPK-interacting and spindle-stabilizing protein-like OS=Homo sapiens OX=9606 GN=MAPK11P1L PE=1 SV=4 | 14.5          | 7            | 1          | 30     | 1                 | 1448                    |                                 |                                              | 1                                        | 0                | 3.58.E+07          | 3.97.E+07          | 3.50.E+07          | 3.25.E+07          | 4.72.E+07              | 5.17.E+07              | 4.48.E+07              | 4.58.E+07              |
| 1693 | Q15738    | sterol-4-alpha-carboxylate 3-dehydrogenase, decarboxylating [OS=Homo sapiens]                        | 14.5          | 11           | 2          | 30     | 2                 | 358                     | 3                               | 2                                            | 2                                        | 0                | 1.41.E+07          | 1.24.E+07          | 1.49.E+07          | 1.43.E+07          | 2.03.E+07              | 1.64.E+07              | 1.50.E+07              | 1.59.E+07              |
| 1694 | Q6ZXV5    | Transmembrane and TPR repeat-containing protein 3 [OS=Homo sapiens]                                  | 14.4          | 3            | 2          | 32     | 2                 | 340                     | 10                              | 2                                            | 2                                        | 0                | 7.98.E+06          | 1.21.E+07          | 1.30.E+07          | 1.40.E+07          | 1.68.E+07              | 1.54.E+07              | 1.29.E+07              | 1.67.E+07              |
| 1695 | Q6UW68    | Transmembrane protein 205 [OS=Homo sapiens]                                                          | 14.4          | 24           | 2          | 8      | 2                 | 88                      | 8                               | 2                                            | 2                                        | 0                | 2.74.E+07          | 3.25.E+07          | 2.48.E+07          | 3.55.E+07          | 2.63.E+07              | 2.56.E+07              | 2.75.E+07              | 2.82.E+07              |
| 1696 | Q7Z4V5    | Hepatoma-derived growth factor-related protein 2 [OS=Homo sapiens]                                   | 14.4          | 4            | 2          | 28     | 2                 | 323                     | 25                              | 1                                            | 2                                        | 0                | 3.55.E+07          | 3.52.E+07          | 3.93.E+07          | 3.63.E+07          | 4.89.E+07              | 4.84.E+07              | 5.00.E+07              | 5.08.E+07              |
| 1697 | Q04941-1  | proteolipid protein 2 [OS=Homo sapiens]                                                              | 14.4          | 18           | 2          | 113    | 2                 | 1854                    | 163                             | 2                                            | 2                                        | 0                | 8.89.E+07          | 9.57.E+07          | 9.08.E+07          | 8.39.E+07          | 5.39.E+07              | 5.35.E+07              | 5.22.E+07              | 5.40.E+07              |
| 1698 | Q05519    | serine/arginine-rich splicing factor 11 [OS=Homo sapiens]                                            | 14.3          | 5            | 2          | 98     | 2                 | 625                     | 91                              | 2                                            | 2                                        | 0                | 7.60.E+07          | 7.58.E+07          | 7.98.E+07          | 7.65.E+07          | 7.97.E+07              | 8.69.E+07              | 6.56.E+07              | 8.00.E+07              |
| 1699 | Q5UIP0    | Telomere-associated protein RIF1 [OS=Homo sapiens]                                                   | 14.3          | 2            | 3          | 11     | 3                 | 80                      | 3                               | 3                                            | 2                                        | 0                | 1.33.E+07          | 1.57.E+07          | 1.27.E+07          | 1.54.E+07          | 1.11.E+07              | 9.60.E+06              | 8.45.E+06              | 1.13.E+07              |
| 1700 | Q9Y512    | sorting and assembly machinery component 50 homolog [OS=Homo sapiens]                                | 14.3          | 7            | 3          | 46     | 3                 | 313                     | 50                              | 3                                            | 3                                        | 0                | 5.23.E+07          | 4.81.E+07          | 4.80.E+07          | 4.41.E+07          | 5.42.E+07              | 6.47.E+07              | 5.91.E+07              | 5.57.E+07              |
| 1701 | Q9NXH9-1  | tRNA (guanine(26)-N(2))-dimethyltransferase [OS=Homo sapiens]                                        | 14.3          | 4            | 1          | 48     | 1                 | 910                     | 69                              | 1                                            | 1                                        | 0                | 2.29.E+07          | 1.84.E+07          | 1.92.E+07          | 2.27.E+07          | 1.60.E+07              | 1.36.E+07              | 2.06.E+07              | 1.11.E+07              |
| 1702 | Q9H307    | Pinin [OS=Homo sapiens]                                                                              | 14.3          | 5            | 3          | 38     | 3                 |                         | 93                              | 3                                            | 0                                        | 0                | 5.37.E+07          | 5.55.E+07          | 4.98.E+07          | 5.35.E+07          | 5.77.E+07              | 5.61.E+07              | 3.77.E+07              | 5.03.E+07              |
| 1703 | Q9Y2A7-1  | Nck-associated protein 1 [OS=Homo sapiens]                                                           | 14.3          | 2            | 1          | 54     | 1                 | 510                     | 73                              | 1                                            | 1                                        | 0                | 3.60.E+07          | 2.12.E+07          | 3.83.E+07          | 1.75.E+07          | 1.78.E+07              | 1.99.E+07              | 8.13.E+06              | 3.05.E+07              |
| 1704 | Q8TCD5    | 5(3)-deoxyribonucleotidase, cytosolic type [OS=Homo sapiens]                                         | 14.3          | 19           | 2          | 36     | 2                 | 285                     | 32                              | 2                                            | 2                                        | 0                | 3.21.E+07          | 3.33.E+07          | 2.87.E+07          | 2.87.E+07          | 2.87.E+07              | 2.92.E+07              | 2.93.E+07              | 2.64.E+07              |
| 1705 | Q99986    | Serine/threonine-protein kinase VRK1 [OS=Homo sapiens]                                               | 14.2          | 9            | 3          | 6      | 3                 | 30                      | 6                               | 3                                            | 3                                        | 0                | 3.63.E+07          | 3.63.E+07          | 6.15.E+07          | 5.67.E+07          | 9.82.E+07              | 6.03.E+07              | 5.62.E+07              | 9.11.E+07              |
| 1706 | Q9H7B2    | Ribosome production factor 2 homolog [OS=Homo sapiens]                                               | 14.2          | 15           | 4          | 24     | 4                 | 85                      | 8                               | 4                                            | 4                                        | 0                | 3.22.E+07          | 3.41.E+07          | 2.88.E+07          | 2.41.E+07          | 1.68.E+07              | 2.87.E+07              | 1.25.E+07              | 1.99.E+07              |
| 1707 | O95202-1  | mitochondrial proton/calcium exchanger protein [OS=Homo sapiens]                                     | 14.1          | 9            | 4          | 51     | 4                 | 80                      | 23                              | 4                                            | 4                                        | 0                | 7.82.E+07          | 8.82.E+07          | 5.83.E+07          | 7.93.E+07          | 6.64.E+07              | 6.47.E+07              | 5.60.E+07              | 6.46.E+07              |
| 1708 | Q13751    | Laminin subunit beta-3 [OS=Homo sapiens]                                                             | 14.1          | 2            | 1          | 60     | 1                 | 1760                    | 91                              | 1                                            | 1                                        | 0                | 1.19.E+07          | 9.29.E+06          | 1.02.E+07          | 1.03.E+07          | 8.15.E+06              | 7.46.E+06              | 7.10.E+06              | 7.78.E+06              |
| 1709 | Q9Y2U8    | inner nuclear membrane protein Man1 [OS=Homo sapiens]                                                | 14.1          | 7            | 4          | 10     | 4                 | 51                      | 5                               | 4                                            | 3                                        | 0                | 5.12.E+07          | 4.89.E+07          | 4.96.E+07          | 4.23.E+07          | 3.82.E+07              | 4.08.E+07              | 4.89.E+07              | 3.49.E+07              |
| 1710 | O43172-1  | U4/U6 small nuclear ribonucleoprotein Prp4 [OS=Homo sapiens]                                         | 14.1          | 8            | 3          | 6      | 3                 | 44                      | 5                               | 3                                            | 2                                        | 0                | 4.54.E+07          | 3.03.E+07          | 3.30.E+07          | 3.05.E+07          | 2.65.E+07              | 2.46.E+07              | 2.93.E+07              | 2.39.E+07              |
| 1711 | Q9Y241    | HIG1 domain family member 1A, mitochondrial [OS=Homo sapiens]                                        | 14.0          | 47           | 2          | 8      | 2                 | 162                     | 0                               | 1                                            | 2                                        | 0                | 1.55.E+07          | 1.45.E+07          | 1.34.E+07          | 1.62.E+07          | 1.50.E+07              | 1.29.E+07              | 1.37.E+07              | 1.70.E+07              |
| 1712 | Q9Y2V2    | Calcium-regulated heat-stable protein 1 [OS=Homo sapiens]                                            | 14.0          | 11           | 1          | 46     | 1                 | 621                     | 84                              | 1                                            | 1                                        | 0                | 4.88.E+07          | 5.08.E+07          | 5.59.E+07          | 4.71.E+07          | 7.98.E+07              | 8.50.E+07              | 8.27.E+07              | 8.15.E+07              |
| 1713 | Q9Y5Y2    | Cytosolic Fe-S cluster assembly factor NUBP2 [OS=Homo sapiens]                                       | 14.0          | 20           | 2          | 30     | 2                 | 184                     | 37                              | 2                                            | 2                                        | 0                | 3.27.E+07          | 3.42.E+07          | 2.07.E+07          | 3.05.E+07          | 4.83.E+07              | 4.72.E+07              | 3.95.E+07              | 4.25.E+07              |
| 1714 | Q9H0D6-1  | 5'-3' exoribonuclease 2 [OS=Homo sapiens]                                                            | 14.0          | 7            | 4          | 15     | 4                 | 24                      | 14                              | 3                                            | 4                                        | 0                | 3.85.E+07          | 5.54.E+07          | 5.31.E+07          | 4.85.E+07          | 6.52.E+07              | 6.25.E+07              | 5.54.E+07              | 5.82.E+07              |
| 1715 | P61421    | V-type proton ATPase subunit d 1 [OS=Homo sapiens]                                                   | 14.0          | 15           | 3          | 13     | 3                 | 68                      | 9                               | 3                                            | 2                                        | 0                | 1.73.E+08          | 1.71.E+08          | 1.67.E+08          | 1.94.E+08          | 2.61.E+08              | 2.23.E+08              | 2.41.E+08              | 2.33.E+08              |
| 1716 | Q8NE86    | Calcium uniporter protein, mitochondrial [OS=Homo sapiens]                                           | 14.0          | 10           | 2          | 36     | 2                 | 607                     | 33                              | 2                                            | 2                                        | 0                | 1.90.E+07          | 2.11.E+07          | 1.81.E+07          | 2.16.E+07          | 1.89.E+07              | 1.91.E+07              | 1.55.E+07              | 1.87.E+07              |
| 1717 | Q9NPJ3-1  | Acyl-coenzyme A thioesterase 13 [OS=Homo sapiens]                                                    | 14.0          | 31           | 3          | 74     | 3                 | 907                     | 95                              | 3                                            | 1                                        | 0                | 2.08.E+08          | 2.30.E+08          | 2.78.E+08          | 2.26.E+08          | 2.99.E+08              | 3.88.E+08              | 3.65.E+08              | 3.81.E+08              |
| 1718 | Q9NX40    | OCA1 domain-containing protein 1 [OS=Homo sapiens]                                                   | 13.9          | 11           | 2          | 26     | 2                 | 375                     | 26                              | 2                                            | 2                                        | 0                | 6.17.E+07          | 6.35.E+07          | 5.99.E+07          | 6.74.E+07          | 8.09.E+07              | 6.60.E+07              | 7.34.E+07              | 7.15.E+07              |
| 1719 | P49959    | Double-strand break repair protein MRE11 [OS=Homo sapiens]                                           | 13.9          | 5            | 2          | 10     | 2                 | 46                      | 11                              | 2                                            | 2                                        | 0                | 1.35.E+07          | 1.09.E+07          | 1.07.E+07          | 1.92.E+07          | 1.90.E+07              | 2.31.E+07              | 1.76.E+07              | 2.01.E+07              |
| 1720 | Q13247    | Serine/arginine-rich splicing factor 6 [OS=Homo sapiens]                                             | 13.9          | 8            | 3          | 112    | 3                 | 781                     | 75                              | 3                                            | 3                                        | 0                | 2.68.E+08          | 2.55.E+08          | 2.71.E+08          | 2.66.E+08          | 2.73.E+08              | 2.65.E+08              | 2.73.E+08              | 2.67.E+08              |
| 1721 | Q9Y305-1  | Acyl-coenzyme A thioesterase 9, mitochondrial [OS=Homo sapiens]                                      | 13.9          | 10           | 3          | 26     | 3                 | 36                      | 7                               | 3                                            | 3                                        | 0                | 3.67.E+07          | 3.66.E+07          | 4.06.E+07          | 2.03.E+07          | 3.83.E+07              | 4.03.E+07              | 4.35.E+07              | 4.02.E+07              |
| 1722 | Q15363    | Transmembrane emp24 domain-containing protein 2 [OS=Homo sapiens]                                    | 13.9          | 11           | 2          | 40     | 2                 | 341                     | 38                              | 2                                            | 2                                        | 0                | 8.44.E+07          | 8.32.E+07          | 8.10.E+07          | 8.56.E+07          | 8.65.E+07              | 8.25.E+07              | 6.44.E+07              | 7.59.E+07              |
| 1723 | P82912-1  | 28S ribosomal protein S11, mitochondrial [OS=Homo sapiens]                                           | 13.8          | 28           | 3          | 12     | 3                 | 72                      | 9                               | 3                                            | 3                                        | 0                | 6.64.E+07          | 3.47.E+07          | 4.69.E+07          | 6.90.E+07          | 3.63.E+07              | 3.54.E+07              | 3.66.E+07              | 6.34.E+07              |
| 1724 | P01116    | GTPase KRas [OS=Homo sapiens]                                                                        | 13.8          | 24           | 3          | 25     | 3                 | 87                      | 17                              | 3                                            | 3                                        | 0                | 3.29.E+07          | 4.45.E+07          | 3.64.E+07          | 2.74.E+07          | 5.29.E+07              | 5.53.E+07              | 5.00.E+07              | 4.42.E+07              |
| 1725 | Q13144    | Translation initiation factor eIF-2B subunit epsilon [OS=Homo sapiens]                               | 13.8          | 5            | 2          | 28     | 2                 | 104                     | 22                              | 2                                            | 2                                        | 0                | 9.29.E+06          | 8.76.E+06          | 2.87.E+06          | 4.55.E+06          | 8.89.E+06              | 8.69.E+06              | 1.31.E+07              | 1.01.E+07              |
| 1726 | O95758    | polypyrimidine tract-binding protein 3 [OS=Homo sapiens]                                             | 13.8          | 10           | 4          | 107    | 2                 | 439                     | 103                             | 3                                            | 4                                        | 0                | 1.94.E+07          | 1.78.E+07          | 1.79.E+07          | 1.36.E+07          | 1.67.E+07              | 1.81.E+07              | 2.07.E+07              | 1.60.E+07              |

| No.  | Accession | Description                                                                    | Sum PEP Score | Coverage [%] | # Peptides | # PSMs | # Unique Peptides | Score Mascot: A5 Mascot | Score Sequest HT: A2 Sequest HT | # Peptides (by Search Engine): A2 Sequest HT | # Peptides (by Search Engine): A5 Mascot | # Razor Peptides | ctrl Abundance s_1 | ctrl Abundance s_2 | ctrl Abundance s_3 | ctrl Abundance s_4 | JAM-A KO Abundance s_1 | JAM-A KO Abundance s_2 | JAM-A KO Abundance s_3 | JAM-A KO Abundance s_4 |
|------|-----------|--------------------------------------------------------------------------------|---------------|--------------|------------|--------|-------------------|-------------------------|---------------------------------|----------------------------------------------|------------------------------------------|------------------|--------------------|--------------------|--------------------|--------------------|------------------------|------------------------|------------------------|------------------------|
| 1727 | Q9HAB8-1  | phosphopantothenate—cysteine ligase [OS=Homo sapiens]                          | 13.8          | 17           | 3          | 76     | 3                 | 311                     | 10                              | 3                                            | 3                                        | 0                | 9.41.E+07          | 8.28.E+07          | 8.46.E+07          | 7.39.E+07          | 7.72.E+07              | 7.70.E+07              | 7.85.E+07              | 8.18.E+07              |
| 1728 | P41223    | Protein BUD31 homolog [OS=Homo sapiens]                                        | 13.7          | 21           | 2          | 89     | 2                 | 418                     | 44                              | 2                                            | 2                                        | 0                | 2.40.E+07          | 2.17.E+07          | 2.78.E+07          | 2.22.E+07          | 1.85.E+07              | 2.01.E+07              | 5.48.E+07              | 5.65.E+07              |
| 1729 | P30405    | Peptidyl-prolyl cis-trans isomerase F, mitochondrial [OS=Homo sapiens]         | 13.7          | 30           | 4          | 83     | 4                 | 49                      | 14                              | 3                                            | 3                                        | 0                | 8.18.E+07          | 7.47.E+07          | 7.90.E+07          | 8.44.E+07          | 1.06.E+08              | 9.49.E+07              | 8.94.E+07              | 9.90.E+07              |
| 1730 | P55268    | laminin subunit beta-2 [OS=Homo sapiens]                                       | 13.6          | 1            | 1          | 2      | 1                 | 63                      | 3                               | 1                                            | 1                                        | 0                | 5.83.E+06          | 6.60.E+06          | 4.53.E+06          | 1.32.E+06          | 8.41.E+06              | 1.04.E+07              | 7.41.E+06              | 8.14.E+06              |
| 1731 | O15160    | DNA-directed RNA polymerases I and III subunit RPAC1 [OS=Homo sapiens]         | 13.6          | 9            | 2          | 23     | 2                 | 298                     | 25                              | 2                                            | 2                                        | 0                | 4.36.E+07          | 4.59.E+07          | 4.34.E+07          | 3.90.E+07          | 4.77.E+07              | 4.89.E+07              | 5.33.E+07              | 5.64.E+07              |
| 1732 | P20339    | Ras-related protein Rab-5A [OS=Homo sapiens]                                   | 13.6          | 16           | 3          | 92     | 1                 | 613                     | 120                             | 3                                            | 3                                        | 0                |                    |                    |                    |                    |                        |                        |                        |                        |
| 1733 | Q9P210    | Cleavage and polyadenylation specificity factor subunit 2 [OS=Homo sapiens]    | 13.6          | 2            | 1          | 66     | 1                 | 1773                    | 75                              | 1                                            | 1                                        | 0                | 9.04.E+06          | 8.99.E+06          | 7.93.E+06          | 9.11.E+06          | 5.15.E+06              | 4.79.E+06              | 4.06.E+06              | 5.60.E+06              |
| 1734 | Q9NP58    | ATP-binding cassette sub-family B member 6, mitochondrial [OS=Homo sapiens]    | 13.6          | 4            | 2          | 29     | 2                 | 403                     | 34                              | 2                                            | 2                                        | 0                | 3.53.E+07          | 3.76.E+07          | 3.41.E+07          | 3.42.E+07          | 3.26.E+07              | 3.52.E+07              | 3.04.E+07              | 3.15.E+07              |
| 1735 | Q04446    | 1,4-alpha-glucan-branching enzyme [OS=Homo sapiens]                            | 13.6          | 6            | 3          | 36     | 3                 | 285                     | 25                              | 3                                            | 3                                        | 0                | 3.64.E+07          | 4.37.E+07          | 4.42.E+07          | 4.59.E+07          | 3.20.E+07              | 5.32.E+07              | 2.74.E+07              | 2.95.E+07              |
| 1736 | Q9UMS0    | NFU1 iron-sulfur cluster scaffold homolog, mitochondrial [OS=Homo sapiens]     | 13.6          | 17           | 3          | 12     | 3                 | 153                     | 12                              | 3                                            | 3                                        | 0                | 3.78.E+07          | 3.64.E+07          | 3.65.E+07          | 3.59.E+07          | 5.34.E+07              | 5.50.E+07              | 2.78.E+07              | 5.64.E+07              |
| 1737 | Q14684    | Ribosomal RNA processing protein 1 homolog B [OS=Homo sapiens]                 | 13.5          | 3            | 2          | 30     | 2                 | 205                     | 14                              | 2                                            | 2                                        | 0                | 1.10.E+07          | 1.04.E+07          | 8.70.E+06          | 9.64.E+06          | 9.79.E+06              | 1.05.E+07              | 8.77.E+06              | 9.44.E+06              |
| 1738 | Q14160    | protein scribble homolog [OS=Homo sapiens]                                     | 13.5          | 3            | 2          | 8      | 2                 | 79                      | 8                               | 2                                            | 2                                        | 0                | 1.14.E+07          | 1.55.E+07          | 1.22.E+07          | 1.68.E+07          | 6.29.E+06              | 1.18.E+07              | 1.08.E+07              | 1.25.E+07              |
| 1739 | P49593    | Protein phosphatase 1F [OS=Homo sapiens]                                       | 13.4          | 8            | 2          | 44     | 2                 | 389                     | 20                              | 2                                            | 2                                        | 0                | 1.13.E+07          | 1.54.E+07          | 9.33.E+06          | 1.22.E+07          | 2.01.E+07              | 1.26.E+07              | 1.43.E+07              | 1.36.E+07              |
| 1740 | Q9Y2T2    | ap-3 complex subunit mu-1 [OS=Homo sapiens]                                    | 13.4          | 8            | 2          | 24     | 2                 | 216                     | 37                              | 2                                            | 2                                        | 0                | 2.80.E+07          | 2.89.E+07          | 2.27.E+07          | 2.72.E+07          | 3.51.E+07              | 3.56.E+07              | 3.25.E+07              | 3.72.E+07              |
| 1741 | P18583-1  | Protein SON [OS=Homo sapiens]                                                  | 13.4          | 1            | 2          | 7      | 1                 | 140                     | 6                               | 1                                            | 2                                        | 1                | 2.46.E+07          | 2.38.E+07          | 2.43.E+07          | 2.48.E+07          | 2.48.E+07              | 2.32.E+07              | 1.19.E+07              | 2.32.E+07              |
| 1742 | Q08752    | peptidyl-prolyl cis-trans isomerase D [OS=Homo sapiens]                        | 13.4          | 7            | 2          | 11     | 2                 | 223                     | 16                              | 2                                            | 1                                        | 0                | 4.16.E+07          | 4.16.E+07          | 4.11.E+07          | 4.80.E+07          | 4.97.E+07              | 5.05.E+07              | 4.85.E+07              | 4.79.E+07              |
| 1743 | Q6RW13    | Type-1 angiotensin II receptor-associated protein [OS=Homo sapiens]            | 13.4          | 14           | 1          | 8      | 1                 | 224                     | 13                              | 1                                            | 1                                        | 0                | 9.49.E+06          | 1.16.E+07          | 8.92.E+06          | 1.24.E+07          | 1.59.E+07              | 1.87.E+07              | 1.60.E+07              | 1.60.E+07              |
| 1744 | O75348    | V-type proton ATPase subunit G 1 [OS=Homo sapiens]                             | 13.4          | 31           | 2          | 16     | 2                 | 121                     | 23                              | 2                                            | 2                                        | 0                | 2.56.E+07          | 3.05.E+07          | 2.48.E+07          | 3.20.E+07          | 3.73.E+07              | 2.35.E+07              | 2.68.E+07              | 1.79.E+07              |
| 1745 | P40937-1  | Replication factor C subunit 5 [OS=Homo sapiens]                               | 13.3          | 9            | 2          | 37     | 2                 | 647                     | 45                              | 2                                            | 1                                        | 0                | 2.33.E+07          | 2.83.E+07          | 2.34.E+07          | 3.21.E+07          | 3.79.E+07              | 3.41.E+07              | 3.34.E+07              | 3.63.E+07              |
| 1746 | O43156    | TELO2-interacting protein 1 homolog [OS=Homo sapiens]                          | 13.3          | 3            | 2          | 44     | 2                 | 504                     | 5                               | 2                                            | 2                                        | 0                | 7.00.E+06          | 1.13.E+07          | 1.09.E+07          | 1.08.E+07          | 1.01.E+07              | 8.01.E+06              | 1.55.E+07              | 9.75.E+06              |
| 1747 | Q99808    | Equilibrative nucleoside transporter 1 [OS=Homo sapiens]                       | 13.3          | 3            | 1          | 86     | 1                 | 1394                    | 71                              | 1                                            | 1                                        | 0                | 1.23.E+07          | 1.23.E+07          | 1.13.E+07          | 1.20.E+07          | 9.69.E+06              | 8.49.E+06              | 8.12.E+06              | 8.12.E+06              |
| 1748 | Q6IN85    | Serine/threonine-protein phosphatase 4 regulatory subunit 3A [OS=Homo sapiens] | 13.2          | 4            | 2          | 8      | 2                 | 121                     | 8                               | 2                                            | 2                                        | 0                | 1.95.E+07          | 2.28.E+07          | 1.62.E+07          | 2.28.E+07          | 1.92.E+07              | 1.40.E+07              | 1.22.E+07              | 1.93.E+07              |
| 1749 | Q961J6    | Mannose-1-phosphate guanyltransferase alpha [OS=Homo sapiens]                  | 13.2          | 10           | 3          | 33     | 3                 | 81                      | 25                              | 3                                            | 3                                        | 0                | 2.98.E+07          | 2.94.E+07          | 2.87.E+07          | 3.36.E+07          | 3.76.E+07              | 3.51.E+07              | 3.77.E+07              | 3.57.E+07              |
| 1750 | Q9NWW4    | UPF0587 protein C1orf123 [OS=Homo sapiens]                                     | 13.2          | 25           | 2          | 44     | 2                 | 108                     | 60                              | 2                                            | 2                                        | 0                | 4.97.E+07          | 6.50.E+07          | 5.64.E+07          | 5.88.E+07          | 6.51.E+07              | 7.39.E+07              | 6.74.E+07              | 7.28.E+07              |
| 1751 | Q86U38    | Nucleolar protein 9 [OS=Homo sapiens]                                          | 13.2          | 8            | 2          | 16     | 2                 | 252                     | 17                              | 2                                            | 2                                        | 0                | 9.36.E+06          | 9.89.E+06          | 1.46.E+07          | 1.46.E+07          | 2.54.E+07              | 8.37.E+06              | 9.76.E+06              | 9.90.E+05              |
| 1752 | Q8NFJ5    | Retinoic acid-induced protein 3 [OS=Homo sapiens]                              | 13.2          | 10           | 1          | 18     | 1                 | 250                     | 36                              | 1                                            | 1                                        | 0                | 2.66.E+07          | 3.29.E+07          | 2.38.E+07          | 3.26.E+07          | 4.57.E+07              | 4.49.E+07              | 3.25.E+07              | 3.88.E+07              |
| 1753 | O00161    | Synaptosomal-associated protein 23 [OS=Homo sapiens]                           | 13.1          | 13           | 2          | 18     | 2                 | 334                     | 16                              | 2                                            | 2                                        | 0                | 8.49.E+06          | 7.43.E+06          | 6.59.E+06          | 9.09.E+06          | 1.47.E+07              | 1.46.E+07              | 1.37.E+07              | 3.48.E+07              |
| 1754 | Q9Y679-2  | Isoform Short of Ancient ubiquitous protein 1 [OS=Homo sapiens]                | 13.1          | 9            | 1          | 40     | 1                 | 362                     | 62                              | 1                                            | 1                                        | 0                | 2.05.E+07          | 2.08.E+07          | 2.03.E+07          | 2.53.E+07          | 2.53.E+07              | 2.19.E+07              | 1.45.E+07              | 2.18.E+07              |
| 1755 | P40938    | replication factor C subunit 3 [OS=Homo sapiens]                               | 13.1          | 12           | 3          | 24     | 3                 | 141                     | 16                              | 3                                            | 3                                        | 0                | 2.64.E+07          | 2.41.E+07          | 2.41.E+07          | 2.48.E+07          | 3.72.E+07              | 3.59.E+07              | 2.54.E+07              | 3.57.E+07              |
| 1756 | Q9P287    | BRCA2 and CDKN1A-interacting protein [OS=Homo sapiens]                         | 13.1          | 12           | 2          | 14     | 2                 | 24                      | 39                              | 2                                            | 1                                        | 0                |                    |                    |                    |                    |                        |                        |                        |                        |
| 1757 | O15511-1  | Actin-related protein 2/3 complex subunit 5 [OS=Homo sapiens]                  | 13.1          | 23           | 1          | 6      | 1                 | 85                      | 12                              | 1                                            | 1                                        | 0                | 1.58.E+07          | 1.74.E+07          | 1.53.E+07          | 1.41.E+07          | 2.88.E+07              | 2.44.E+07              | 2.70.E+07              | 3.20.E+07              |
| 1758 | Q14669-1  | E3 ubiquitin-protein ligase TRIP12 [OS=Homo sapiens]                           | 13.0          | 2            | 2          | 26     | 2                 | 282                     | 11                              | 2                                            | 2                                        | 0                | 1.07.E+07          | 1.29.E+07          | 8.28.E+06          | 1.21.E+07          | 1.49.E+07              | 1.45.E+07              | 1.26.E+07              | 1.54.E+07              |
| 1759 | Q92896    | Golgi apparatus protein 1 [OS=Homo sapiens]                                    | 13.0          | 3            | 2          | 28     | 2                 | 432                     | 28                              | 2                                            | 2                                        | 0                | 1.57.E+07          | 9.61.E+06          | 1.58.E+07          | 1.40.E+07          | 2.44.E+07              | 1.40.E+07              | 2.27.E+07              | 2.40.E+07              |
| 1760 | P51114-1  | Fragile X mental retardation syndrome-related protein 1 [OS=Homo sapiens]      | 13.0          | 2            | 1          | 42     | 1                 | 929                     | 42                              | 1                                            | 1                                        | 0                | 9.98.E+06          | 1.05.E+07          | 8.34.E+06          | 8.69.E+06          | 3.11.E+06              | 4.73.E+06              | 3.71.E+06              | 3.92.E+06              |
| 1761 | Q8TF42    | ubiquitin-associated and SH3 domain-containing protein B [OS=Homo sapiens]     | 13.0          | 6            | 2          | 16     | 2                 | 195                     | 14                              | 2                                            | 2                                        | 0                | 1.29.E+07          | 1.22.E+07          | 1.07.E+07          | 1.26.E+07          | 2.32.E+07              | 2.15.E+07              | 1.95.E+07              | 2.11.E+07              |
| 1762 | O94822    | E3 ubiquitin-protein ligase listerin [OS=Homo sapiens]                         | 13.0          | 4            | 4          | 22     | 4                 | 64                      | 6                               | 4                                            | 4                                        | 0                | 5.03.E+07          | 5.61.E+07          | 5.31.E+07          | 6.17.E+07          | 5.48.E+07              | 5.86.E+07              | 5.25.E+07              | 6.60.E+07              |
| 1763 | Q2TAY7    | WD40 repeat-containing protein SMU1 [OS=Homo sapiens]                          | 12.9          | 9            | 3          | 12     | 3                 | 43                      | 6                               | 3                                            | 3                                        | 0                | 5.30.E+06          | 3.76.E+06          | 5.36.E+06          | 1.95.E+07          | 2.15.E+07              | 2.04.E+07              | 2.15.E+07              | 1.90.E+07              |
| 1764 | O15027-1  | Protein transport protein Sec16A [OS=Homo sapiens]                             | 12.9          | 1            | 1          | 34     | 1                 | 745                     | 46                              | 1                                            | 1                                        | 0                | 9.41.E+06          | 8.66.E+06          | 8.66.E+06          | 9.20.E+06          | 7.63.E+06              | 7.05.E+06              | 6.96.E+06              | 6.77.E+06              |
| 1765 | Q9BY32-1  | Inosine triphosphate pyrophosphatase [OS=Homo sapiens]                         | 12.8          | 17           | 2          | 42     | 2                 | 559                     | 51                              | 2                                            | 2                                        | 0                | 3.79.E+07          | 4.38.E+07          | 3.69.E+07          | 4.07.E+07          | 6.36.E+07              | 6.29.E+07              | 5.88.E+07              | 6.01.E+07              |
| 1766 | Q9NQP4    | Prefoldin subunit 4 [OS=Homo sapiens]                                          | 12.8          | 20           | 2          | 58     | 2                 | 729                     | 74                              | 2                                            | 2                                        | 0                | 6.14.E+07          | 6.76.E+07          | 5.69.E+07          | 5.85.E+07          | 8.06.E+07              | 8.14.E+07              | 7.69.E+07              | 8.35.E+07              |
| 1767 | Q9Y3B7-1  | 39S ribosomal protein L11, mitochondrial [OS=Homo sapiens]                     | 12.8          | 16           | 2          | 22     | 2                 | 128                     | 27                              | 2                                            | 2                                        | 0                | 3.34.E+07          | 3.64.E+07          | 3.58.E+07          | 3.37.E+07          | 2.58.E+07              | 2.92.E+07              | 2.89.E+07              | 2.74.E+07              |
| 1768 | Q8N183    | Mimitin, mitochondrial [OS=Homo sapiens]                                       | 12.8          | 11           | 1          | 12     | 1                 | 262                     | 16                              | 1                                            | 1                                        | 0                | 7.79.E+06          | 6.97.E+06          | 6.94.E+06          | 8.57.E+06          | 9.66.E+06              | 9.46.E+06              | 6.27.E+06              | 8.55.E+06              |
| 1769 | Q9Y276    | Mitochondrial chaperone BCS1 [OS=Homo sapiens]                                 | 12.8          | 9            | 2          | 28     | 2                 | 302                     | 13                              | 2                                            | 2                                        | 0                | 1.31.E+07          | 2.06.E+07          | 2.50.E+07          | 4.32.E+06          | 1.22.E+07              | 1.05.E+07              | 1.05.E+07              | 1.36.E+07              |
| 1770 | Q01658    | Protein Dr1 [OS=Homo sapiens]                                                  | 12.8          | 27           | 2          | 8      | 2                 | 63                      | 9                               | 2                                            | 2                                        | 0                | 2.42.E+07          | 3.16.E+07          | 1.99.E+07          | 3.09.E+07          | 2.70.E+07              | 3.01.E+07              | 2.48.E+07              | 3.51.E+07              |
| 1771 | P05114    | Non-histone chromosomal protein HMG-14 [OS=Homo sapiens]                       | 12.8          | 48           | 2          | 14     | 2                 | 169                     | 6                               | 2                                            | 2                                        | 0                | 1.31.E+07          | 1.32.E+07          | 1.44.E+07          | 8.18.E+06          | 1.92.E+07              | 2.03.E+07              | 2.04.E+07              | 2.14.E+07              |
| 1772 | Q95487-1  | Protein transport protein Sec24B [OS=Homo sapiens]                             | 12.7          | 2            | 3          | 33     | 3                 | 204                     | 2                               | 3                                            | 3                                        | 0                | 1.08.E+07          | 1.09.E+07          | 1.08.E+07          | 1.12.E+07          | 1.42.E+07              | 1.12.E+07              | 1.16.E+07              | 1.35.E+07              |
| 1773 | P39210    | Protein Mpv17 [OS=Homo sapiens]                                                | 12.7          | 13           | 1          | 13     | 1                 | 184                     | 14                              | 1                                            | 1                                        | 0                | 1.18.E+07          | 3.70.E+06          | 5.95.E+06          | 5.74.E+06          | 5.26.E+06              | 1.23.E+07              | 9.29.E+06              |                        |
| 1774 | Q9NV9S    | Pyridoxine-5-phosphate oxidase [OS=Homo sapiens]                               | 12.7          | 16           | 2          | 12     | 2                 | 204                     | 14                              | 2                                            | 2                                        | 0                | 1.51.E+07          | 1.69.E+07          | 1.36.E+07          | 6.55.E+06          | 2.11.E+07              | 2.52.E+07              | 1.86.E+07              | 1.88.E+07              |
| 1775 | Q9H324    | DnaJ homolog subfamily C member 5 [OS=Homo sapiens]                            | 12.7          | 16           | 2          | 67     | 2                 | 184                     | 5                               | 2                                            | 2                                        | 0                | 3.72.E+07          | 3.48.E+07          | 3.82.E+07          | 3.74.E+07          | 2.94.E+07              | 3.11.E+07              | 3.23.E+07              | 2.93.E+07              |
| 1776 | P00374    | dihydrofolate reductase [OS=Homo sapiens]                                      | 12.7          | 12           | 2          | 44     | 2                 | 410                     | 33                              | 2                                            | 2                                        | 0                | 9.13.E+07          | 8.71.E+07          | 8.73.E+07          | 7.67.E+07          | 8.87.E+07              | 9.36.E+07              | 9.27.E+07              | 9.42.E+07              |
| 1777 | O00560-1  | Syntenin-1 [OS=Homo sapiens]                                                   | 12.6          | 11           | 1          | 4      | 1                 | 99                      | 8                               | 1                                            | 1                                        | 0                |                    |                    |                    |                    | 1.72.E+07              | 1.67.E+07              | 1.20.E+07              | 1.90.E+07              |
| 1778 | Q92696    | geranylgeranyl transferase type-2 subunit alpha [OS=Homo sapiens]              | 12.6          | 8            | 2          | 20     | 2                 | 145                     | 8                               | 2                                            | 2                                        | 0                | 7.21.E+06          | 8.16.E+06          | 7.17.E+06          | 8.59.E+06          | 5.62.E+06              | 4.67.E+06              | 4.37.E+06              | 5.49.E+06              |
| 1779 | P00568    | Adenylate kinase isoenzyme 1 [OS=Homo sapiens]                                 | 12.6          | 7            | 1          | 72     | 1                 | 1021                    | 42                              | 1                                            | 1                                        | 0                | 1.57.E+07          | 1.59.E+07          | 1.30.E+07          | 1.66.E+07          | 1.14.E+07              | 1.05.E+07              | 9.20.E+06              | 1.06.E+07              |

| No.  | Accession | Description                                                                                                     | Sum PEP Score | Coverage [%] | # Peptides | # PSMs | # Unique Peptides | Score Mascot: A5 Mascot | Score Sequest HT: A2 Sequest HT | # Peptides (by Search Engine): A2 Sequest HT | # Peptides (by Search Engine): A5 Mascot | # Razor Peptides | ctrl Abundance_s_1 | ctrl Abundance_s_2 | ctrl Abundance_s_3 | ctrl Abundance_s_4 | JAM-A KO Abundance_s_1 | JAM-A KO Abundance_s_2 | JAM-A KO Abundance_s_3 | JAM-A KO Abundance_s_4 |
|------|-----------|-----------------------------------------------------------------------------------------------------------------|---------------|--------------|------------|--------|-------------------|-------------------------|---------------------------------|----------------------------------------------|------------------------------------------|------------------|--------------------|--------------------|--------------------|--------------------|------------------------|------------------------|------------------------|------------------------|
| 1780 | Q9BV44    | THUMP domain-containing protein 3 [OS=Homo sapiens]                                                             | 12.6          | 7            | 2          | 46     | 2                 | 514                     | 50                              | 2                                            | 2                                        | 0                | 3.41.E+07          | 3.60.E+07          | 2.55.E+07          | 3.36.E+07          | 3.67.E+07              | 4.00.E+07              | 3.06.E+07              | 3.58.E+07              |
| 1781 | Q6WCQ1    | Myosin phosphatase Rho-interacting protein [OS=Homo sapiens]                                                    | 12.6          | 3            | 2          | 10     | 2                 | 147                     | 12                              | 2                                            | 2                                        | 0                | 3.88.E+07          | 3.99.E+07          | 3.22.E+07          | 3.70.E+07          |                        | 3.41.E+06              | 6.30.E+06              |                        |
| 1782 | Q96A65    | Exocyst complex component 4 [OS=Homo sapiens]                                                                   | 12.6          | 5            | 3          | 26     | 3                 | 54                      | 2                               | 3                                            | 3                                        | 0                | 1.10.E+07          | 9.85.E+06          | 1.07.E+07          | 8.74.E+06          | 1.78.E+07              | 1.76.E+07              | 1.54.E+07              | 1.49.E+07              |
| 1783 | Q15067    | Peroxisomal acyl-coenzyme A oxidase 1 [OS=Homo sapiens]                                                         | 12.6          | 8            | 3          | 32     | 3                 | 111                     | 33                              | 3                                            | 3                                        | 0                | 2.26.E+07          | 2.12.E+07          | 1.74.E+07          | 2.37.E+07          | 1.38.E+07              | 1.18.E+07              | 1.03.E+07              | 1.10.E+07              |
| 1784 | P35080-2  | Isoform IIb of Profilin-2 [OS=Homo sapiens]                                                                     | 12.6          | 16           | 2          | 46     | 2                 |                         | 144                             | 2                                            | 0                                        | 8.42.E+07        | 1.08.E+08          | 1.15.E+08          | 1.20.E+08          | 1.37.E+08          | 1.40.E+08              | 1.46.E+08              | 1.37.E+08              |                        |
| 1785 | P51784    | Ubiquitin carboxyl-terminal hydrolase 11 [OS=Homo sapiens]                                                      | 12.6          | 5            | 2          | 36     | 2                 | 469                     | 31                              | 2                                            | 2                                        | 0                | 1.67.E+07          | 2.14.E+07          | 9.42.E+06          | 1.42.E+07          | 2.88.E+07              | 9.96.E+06              |                        | 3.18.E+07              |
| 1786 | O75323-1  | Protein NipSnap homolog 2 [OS=Homo sapiens]                                                                     | 12.5          | 14           | 3          | 73     | 2                 | 617                     | 43                              | 3                                            | 2                                        | 0                | 1.14.E+07          | 1.33.E+07          | 9.80.E+06          | 1.42.E+07          | 1.41.E+07              | 1.30.E+07              | 1.01.E+07              | 1.28.E+07              |
| 1787 | Q9NY12-1  | H/ACA ribonucleoprotein complex subunit 1 [OS=Homo sapiens]                                                     | 12.5          | 16           | 3          | 57     | 3                 | 23                      | 45                              | 3                                            | 3                                        | 0                | 1.28.E+08          | 1.28.E+08          | 1.35.E+08          | 1.28.E+08          | 1.39.E+08              | 1.35.E+08              | 1.04.E+08              | 1.29.E+08              |
| 1788 | P52948-1  | nuclear pore complex protein Nup98-Nup96 [OS=Homo sapiens]                                                      | 12.5          | 2            | 2          | 6      | 2                 | 57                      | 8                               | 2                                            | 2                                        | 0                | 1.19.E+07          | 1.40.E+07          | 1.22.E+07          | 2.20.E+07          | 1.54.E+07              | 2.22.E+07              | 1.42.E+07              | 1.49.E+07              |
| 1789 | O95747    | Serine/threonine-protein kinase OSR1 [OS=Homo sapiens]                                                          | 12.5          | 4            | 2          | 22     | 2                 | 352                     | 17                              | 2                                            | 2                                        | 0                | 4.62.E+07          | 4.94.E+07          | 4.80.E+07          | 4.64.E+07          | 3.96.E+07              | 4.01.E+07              | 3.68.E+07              | 3.47.E+07              |
| 1790 | Q9NUJ1    | Mycophenolic acid acyl-glucuronide esterase, mitochondrial [OS=Homo sapiens]                                    | 12.5          | 7            | 1          | 6      | 1                 | 202                     | 8                               | 1                                            | 1                                        | 0                | 5.37.E+06          | 7.60.E+06          | 5.46.E+06          | 7.33.E+06          | 6.43.E+06              | 9.38.E+06              | 6.48.E+06              | 7.70.E+06              |
| 1791 | Q96JJ7-1  | Protein disulfide-isomerase TMX3 [OS=Homo sapiens]                                                              | 12.5          | 6            | 1          | 2      | 1                 | 42                      | 4                               | 1                                            | 1                                        | 0                |                    |                    |                    |                    |                        |                        |                        |                        |
| 1792 | Q9P0M9    | 39S ribosomal protein L27, mitochondrial [OS=Homo sapiens]                                                      | 12.5          | 10           | 1          | 32     | 1                 | 38                      | 34                              | 1                                            | 1                                        | 0                | 3.74.E+07          | 3.57.E+07          | 4.13.E+07          | 4.21.E+07          | 3.41.E+07              | 3.16.E+07              | 3.61.E+07              | 3.33.E+07              |
| 1793 | O15498    | Synaptobrevin homolog YKT6 [OS=Homo sapiens]                                                                    | 12.5          | 13           | 2          | 10     | 2                 | 214                     | 12                              | 2                                            | 2                                        | 0                | 5.06.E+07          | 4.97.E+07          | 4.90.E+07          | 4.59.E+07          | 4.79.E+07              | 4.78.E+07              | 4.38.E+07              | 4.94.E+07              |
| 1794 | Q9Y3D0    | Mitotic spindle-associated MMXD complex subunit MIP18 [OS=Homo sapiens]                                         | 12.4          | 13           | 1          | 12     | 1                 | 157                     | 26                              | 1                                            | 1                                        | 0                | 1.88.E+07          | 1.90.E+07          | 1.90.E+07          | 2.12.E+07          | 2.31.E+07              | 2.29.E+07              | 2.10.E+07              | 2.42.E+07              |
| 1795 | Q13564-1  | NEDD8-activating enzyme E1 regulatory subunit [OS=Homo sapiens]                                                 | 12.4          | 6            | 2          | 8      | 2                 | 133                     | 12                              | 2                                            | 2                                        | 0                | 2.05.E+07          | 2.44.E+07          | 2.18.E+07          | 2.63.E+07          | 2.97.E+07              | 2.57.E+07              | 2.76.E+07              | 3.20.E+07              |
| 1796 | Q12824-1  | SWI/SNF-related matrix-associated actin-dependent regulator of chromatin subfamily B member 1 [OS=Homo sapiens] | 12.3          | 8            | 2          | 24     | 2                 | 242                     | 28                              | 2                                            | 2                                        | 0                | 3.64.E+07          | 3.70.E+07          | 3.30.E+07          | 3.26.E+07          | 3.64.E+07              | 4.10.E+07              | 3.67.E+07              | 4.06.E+07              |
| 1797 | Q9NZB2-1  | Constitutive coactivator of PPAR-gamma-like protein 1 [OS=Homo sapiens]                                         | 12.3          | 4            | 3          | 17     | 3                 | 35                      | 7                               | 2                                            | 3                                        | 0                | 4.53.E+07          | 4.62.E+07          | 2.98.E+07          | 3.58.E+07          | 4.74.E+07              | 4.28.E+07              | 3.70.E+07              | 4.37.E+07              |
| 1798 | P49770    | Translation initiation factor eIF-2B subunit beta [OS=Homo sapiens]                                             | 12.3          | 9            | 1          | 10     | 1                 | 187                     | 17                              | 1                                            | 1                                        | 0                | 1.05.E+07          | 1.15.E+07          | 1.00.E+07          | 1.03.E+07          | 1.23.E+06              |                        |                        |                        |
| 1799 | Q6PI48    | Aspartate-tRNA ligase, mitochondrial [OS=Homo sapiens]                                                          | 12.3          | 9            | 4          | 42     | 4                 | 304                     | 35                              | 4                                            | 3                                        | 0                | 3.34.E+07          | 3.18.E+07          | 3.62.E+07          | 3.16.E+07          | 6.70.E+07              | 6.14.E+07              | 4.03.E+07              | 6.13.E+07              |
| 1800 | Q725K2-1  | Wings apart-like protein homolog [OS=Homo sapiens]                                                              | 12.3          | 2            | 1          | 50     | 1                 | 771                     | 48                              | 1                                            | 1                                        | 0                | 8.93.E+06          | 8.27.E+06          | 8.45.E+06          | 9.36.E+06          | 8.28.E+06              | 7.47.E+06              | 7.29.E+06              | 7.44.E+06              |
| 1801 | Q13084    | 39S ribosomal protein L28, mitochondrial [OS=Homo sapiens]                                                      | 12.3          | 20           | 3          | 44     | 3                 | 401                     | 45                              | 3                                            | 3                                        | 0                | 2.43.E+07          | 2.55.E+07          | 2.21.E+07          | 1.83.E+07          | 3.10.E+07              | 2.62.E+07              | 2.63.E+07              | 2.61.E+07              |
| 1802 | O75400    | pre-mRNA-processing factor 40 homolog A [OS=Homo sapiens]                                                       | 12.3          | 3            | 2          | 34     | 2                 | 350                     | 43                              | 2                                            | 2                                        | 0                | 8.00.E+07          | 7.89.E+07          | 8.59.E+07          | 7.01.E+07          | 6.64.E+07              | 7.66.E+07              | 7.13.E+07              | 7.52.E+07              |
| 1803 | Q9UHN6-1  | Cell surface hyaluronidase [OS=Homo sapiens]                                                                    | 12.3          | 4            | 3          | 12     | 3                 | 100                     | 8                               | 2                                            | 3                                        | 0                | 7.93.E+05          | 9.23.E+05          | 9.30.E+05          | 7.38.E+05          | 3.30.E+06              | 6.64.E+06              | 2.44.E+06              | 9.00.E+05              |
| 1804 | P22830-1  | Ferrochelatase, mitochondrial [OS=Homo sapiens]                                                                 | 12.2          | 8            | 3          | 41     | 3                 | 124                     | 15                              | 3                                            | 3                                        | 0                | 7.13.E+07          | 6.53.E+07          | 7.20.E+07          | 7.99.E+07          | 9.64.E+07              | 9.57.E+07              | 1.09.E+08              | 1.02.E+08              |
| 1805 | Q93008-3  | Probable ubiquitin carboxyl-terminal hydrolase FAF-X [OS=Homo sapiens]                                          | 12.2          | 2            | 2          | 32     | 2                 | 483                     | 31                              | 1                                            | 2                                        | 0                | 5.74.E+06          | 5.09.E+06          | 3.74.E+06          | 4.30.E+06          | 4.12.E+06              | 3.87.E+06              | 3.47.E+06              | 3.28.E+06              |
| 1806 | Q12789-2  | General transcription factor 3C polypeptide 1 [OS=Homo sapiens]                                                 | 12.2          | 1            | 1          | 2      | 1                 | 40                      | 3                               | 1                                            | 1                                        | 0                | 1.77.E+06          | 1.83.E+06          | 1.62.E+06          | 1.79.E+06          |                        |                        |                        |                        |
| 1807 | Q9NR50-1  | Translation initiation factor eIF-2B subunit gamma [OS=Homo sapiens]                                            | 12.2          | 13           | 3          | 26     | 3                 | 67                      | 15                              | 3                                            | 3                                        | 0                | 2.47.E+07          | 2.75.E+07          | 2.47.E+07          | 2.29.E+07          | 3.96.E+07              | 4.63.E+07              | 2.10.E+07              | 3.70.E+07              |
| 1808 | P43304    | Glycerol-3-phosphate dehydrogenase, mitochondrial [OS=Homo sapiens]                                             | 12.2          | 9            | 4          | 78     | 4                 | 94                      | 23                              | 4                                            | 4                                        | 0                | 4.50.E+07          | 5.62.E+07          | 4.15.E+07          | 4.92.E+07          | 4.43.E+07              | 4.87.E+07              | 4.06.E+07              | 3.91.E+07              |
| 1809 | Q9BY77    | Polymerase delta-interacting protein 3 [OS=Homo sapiens]                                                        | 12.2          | 9            | 2          | 14     | 2                 | 287                     | 19                              | 2                                            | 2                                        | 0                | 1.10.E+07          | 1.36.E+07          | 1.20.E+07          | 1.13.E+07          | 1.59.E+07              | 1.71.E+07              | 1.28.E+07              | 1.65.E+07              |
| 1810 | Q9BRP1    | Programmed cell death protein 2-like [OS=Homo sapiens]                                                          | 12.1          | 6            | 2          | 32     | 2                 | 366                     | 6                               | 1                                            | 2                                        | 0                | 3.81.E+07          | 3.53.E+07          | 2.66.E+07          | 3.42.E+07          | 1.54.E+07              | 2.01.E+07              | 1.32.E+07              | 1.72.E+07              |
| 1811 | Q6NUQ4    | Transmembrane protein 214 [OS=Homo sapiens]                                                                     | 12.0          | 5            | 2          | 66     | 2                 | 245                     | 23                              | 2                                            | 2                                        | 0                | 2.16.E+07          | 2.76.E+07          | 2.80.E+07          | 2.82.E+07          | 1.53.E+07              | 2.88.E+07              | 2.18.E+07              | 2.56.E+07              |
| 1812 | Q8NHH9    | Atlastin-2 [OS=Homo sapiens]                                                                                    | 12.0          | 3            | 2          | 38     | 1                 | 85                      | 3                               | 2                                            | 2                                        | 0                | 8.14.E+06          | 8.08.E+06          | 7.61.E+06          | 8.76.E+06          | 9.25.E+06              | 9.80.E+06              | 8.93.E+06              | 8.73.E+06              |
| 1813 | P61966    | AP-1 complex subunit sigma-1A [OS=Homo sapiens]                                                                 | 12.0          | 10           | 1          | 6      | 1                 | 186                     | 8                               | 1                                            | 1                                        | 0                | 5.06.E+06          | 7.83.E+06          | 4.97.E+06          | 6.96.E+06          | 5.20.E+06              | 8.08.E+06              | 5.15.E+06              | 2.88.E+06              |
| 1814 | Q6P2E9-1  | Enhancer of mRNA-decapping protein 4 [OS=Homo sapiens]                                                          | 12.0          | 3            | 2          | 18     | 2                 | 88                      | 7                               | 2                                            | 2                                        | 0                | 9.23.E+07          | 6.99.E+07          | 7.65.E+07          | 4.64.E+07          | 6.11.E+07              | 7.45.E+07              | 6.81.E+07              | 7.71.E+07              |
| 1815 | Q9Y520    | Protein Prrc2c [OS=Homo sapiens]                                                                                | 12.0          | 3            | 4          | 28     | 4                 | 27                      | 0                               | 4                                            | 4                                        | 0                | 7.65.E+06          | 6.88.E+06          | 7.21.E+06          | 8.32.E+06          | 8.44.E+06              | 9.09.E+06              | 8.66.E+06              | 8.70.E+06              |
| 1816 | P62891    | 60S ribosomal protein L39 [OS=Homo sapiens]                                                                     | 12.0          | 20           | 1          | 128    | 1                 | 502                     | 159                             | 1                                            | 1                                        | 0                | 4.07.E+08          | 3.46.E+08          | 3.93.E+08          | 2.99.E+08          | 3.35.E+08              | 3.55.E+08              | 4.26.E+08              | 3.71.E+08              |
| 1817 | Q9BVJ6-1  | U3 small nucleolar RNA-associated protein 14 homolog A [OS=Homo sapiens]                                        | 11.9          | 5            | 3          | 39     | 3                 | 145                     | 15                              | 3                                            | 3                                        | 0                | 2.03.E+07          | 2.30.E+07          | 1.95.E+07          | 2.22.E+07          | 1.83.E+07              | 1.79.E+07              | 5.99.E+07              | 1.85.E+07              |
| 1818 | Q9H223    | EH domain-containing protein 4 [OS=Homo sapiens]                                                                | 11.9          | 7            | 3          | 28     | 2                 | 61                      | 23                              | 3                                            | 3                                        | 0                | 1.18.E+07          | 5.48.E+07          | 5.85.E+07          | 5.66.E+07          | 6.25.E+07              | 6.73.E+07              | 6.74.E+07              | 5.77.E+07              |
| 1819 | Q8NEJ9    | neuroguinidin [OS=Homo sapiens]                                                                                 | 11.9          | 6            | 1          | 34     | 1                 | 1198                    |                                 | 1                                            | 1                                        | 0                | 8.93.E+06          | 8.96.E+06          | 8.71.E+06          | 9.33.E+06          | 9.67.E+06              | 8.26.E+06              | 7.74.E+06              | 8.80.E+06              |
| 1820 | Q9UNL2    | Translocon-associated protein subunit gamma [OS=Homo sapiens]                                                   | 11.9          | 8            | 1          | 52     | 1                 | 2079                    | 103                             | 1                                            | 1                                        | 0                | 5.69.E+07          | 5.98.E+07          | 5.57.E+07          | 5.81.E+07          | 7.50.E+07              | 7.53.E+07              | 6.85.E+07              | 8.84.E+07              |
| 1821 | O14907    | Tax1-binding protein 3 [OS=Homo sapiens]                                                                        | 11.8          | 14           | 1          | 32     | 1                 | 699                     | 53                              | 1                                            | 1                                        | 0                | 3.28.E+07          | 4.05.E+07          | 3.60.E+07          | 3.79.E+07          | 3.58.E+07              | 2.93.E+07              | 2.52.E+07              | 3.67.E+07              |
| 1822 | Q86WQ0    | nuclear receptor 2C2-associated protein [OS=Homo sapiens]                                                       | 11.8          | 41           | 3          | 22     | 3                 | 87                      | 0                               | 2                                            | 3                                        | 0                | 9.23.E+06          | 5.99.E+07          | 5.55.E+07          | 6.50.E+07          | 9.33.E+06              | 5.08.E+07              | 2.43.E+07              | 5.35.E+07              |
| 1823 | P17612    | cAMP-dependent protein kinase catalytic subunit alpha [OS=Homo sapiens]                                         | 11.8          | 10           | 2          | 58     | 2                 | 655                     | 49                              | 2                                            | 2                                        | 0                | 2.39.E+07          | 2.65.E+07          | 3.98.E+07          | 3.92.E+07          | 3.05.E+07              | 4.20.E+07              | 2.51.E+07              | 4.12.E+07              |
| 1824 | O95168-1  | NADH dehydrogenase [ubiquinone] 1 beta subcomplex subunit 4 [OS=Homo sapiens]                                   | 11.8          | 22           | 2          | 18     | 2                 | 49                      | 19                              | 2                                            | 2                                        | 0                | 4.54.E+07          | 4.04.E+07          | 4.51.E+07          | 3.37.E+07          | 4.12.E+07              | 4.13.E+07              | 4.03.E+07              | 4.15.E+07              |
| 1825 | Q6UB35-1  | Monofunctional C1-tetrahydrofolate synthase, mitochondrial [OS=Homo sapiens]                                    | 11.8          | 4            | 2          | 10     | 2                 | 88                      | 8                               | 2                                            | 2                                        | 0                | 9.45.E+06          | 7.96.E+06          | 4.65.E+06          | 1.26.E+07          | 1.01.E+07              | 9.87.E+06              | 8.39.E+06              | 5.16.E+06              |

| No.  | Accession | Description                                                                            | Sum PEP Score | Coverage [%] | # Peptides | # PSMs | # Unique Peptides | Score Mascot: A5 Mascot | Score Sequest HT: A2 Sequest HT | # Peptides (by Search Engine): A2 Sequest HT | # Peptides (by Search Engine): A5 Mascot | # Razor Peptides | ctrl Abundance s_1 | ctrl Abundance s_2 | ctrl Abundance s_3 | ctrl Abundance s_4 | JAM-A KO Abundance s_1 | JAM-A KO Abundance s_2 | JAM-A KO Abundance s_3 | JAM-A KO Abundance s_4 |
|------|-----------|----------------------------------------------------------------------------------------|---------------|--------------|------------|--------|-------------------|-------------------------|---------------------------------|----------------------------------------------|------------------------------------------|------------------|--------------------|--------------------|--------------------|--------------------|------------------------|------------------------|------------------------|------------------------|
| 1826 | Q16740    | ATP-dependent Clp protease proteolytic subunit, mitochondrial [OS=Homo sapiens]        | 11.8          | 18           | 2          | 37     | 2                 | 136                     | 34                              | 2                                            | 2                                        | 0                | 2.20.E+07          | 2.40.E+07          | 1.78.E+07          | 2.06.E+07          | 2.49.E+07              | 2.62.E+07              | 2.14.E+07              | 2.50.E+07              |
| 1827 | P37198    | nuclear pore glycoprotein p82 [OS=Homo sapiens]                                        | 11.7          | 6            | 2          | 20     | 2                 | 169                     | 12                              | 2                                            | 2                                        | 0                | 2.11.E+07          | 2.34.E+07          | 1.92.E+07          | 2.20.E+07          | 2.68.E+07              | 2.67.E+07              | 2.38.E+07              | 2.48.E+07              |
| 1828 | P62877    | E3 ubiquitin-protein ligase RBX1 [OS=Homo sapiens]                                     | 11.7          | 18           | 1          | 2      | 1                 | 116                     |                                 |                                              | 1                                        | 0                | 9.03.E+06          | 9.81.E+06          | 1.20.E+07          | 1.49.E+07          | 6.91.E+06              | 8.29.E+06              | 7.09.E+06              | 6.42.E+06              |
| 1829 | Q9H444    | Charged multivesicular body protein 4b [OS=Homo sapiens]                               | 11.7          | 16           | 3          | 20     | 3                 | 69                      | 6                               | 3                                            | 2                                        | 0                | 4.13.E+07          | 3.98.E+07          | 4.31.E+07          | 4.21.E+07          | 3.41.E+07              | 3.60.E+07              | 4.32.E+07              | 3.58.E+07              |
| 1830 | Q8TE77    | Protein phosphatase Slingshot homolog 3 [OS=Homo sapiens]                              | 11.7          | 5            | 2          | 8      | 2                 | 40                      | 6                               | 2                                            | 2                                        | 0                | 1.58.E+07          | 1.68.E+07          | 1.27.E+07          | 1.29.E+07          | 1.87.E+07              | 1.82.E+07              | 1.08.E+07              | 1.50.E+07              |
| 1831 | Q99961    | Endophilin-A2 [OS=Homo sapiens]                                                        | 11.7          | 9            | 3          | 49     | 3                 | 237                     | 44                              | 3                                            | 3                                        | 0                | 8.04.E+07          | 7.62.E+07          | 8.01.E+07          | 8.89.E+07          | 8.09.E+07              | 6.24.E+07              | 8.43.E+07              | 8.37.E+07              |
| 1832 | Q9NS86    | IanC-like protein 2 [OS=Homo sapiens]                                                  | 11.7          | 4            | 1          | 4      | 1                 | 192                     | 7                               | 1                                            | 1                                        | 0                | 5.21.E+06          | 8.76.E+06          | 7.48.E+06          | 1.12.E+07          | 1.11.E+07              | 7.57.E+06              | 1.73.E+06              | 1.12.E+07              |
| 1833 | P29992    | guanine nucleotide-binding protein subunit alpha-11 [OS=Homo sapiens]                  | 11.7          | 6            | 1          | 26     | 1                 | 512                     | 48                              | 1                                            | 1                                        | 0                | 1.39.E+07          | 1.39.E+07          | 1.19.E+07          | 1.32.E+07          | 1.34.E+07              | 1.14.E+07              | 9.08.E+06              | 1.21.E+07              |
| 1834 | Q9NZL9    | Methionine adenosyltransferase 2 subunit beta [OS=Homo sapiens]                        | 11.7          | 10           | 3          | 9      | 3                 | 53                      | 4                               | 3                                            | 3                                        | 0                | 4.44.E+07          | 4.34.E+07          | 4.61.E+07          | 3.79.E+07          | 4.68.E+07              | 4.49.E+07              | 4.49.E+07              | 4.93.E+07              |
| 1835 | Q15388    | Mitochondrial import receptor subunit TOM20 homolog [OS=Homo sapiens]                  | 11.7          | 30           | 1          | 26     | 1                 | 179                     | 39                              | 1                                            | 1                                        | 0                | 2.70.E+07          | 2.92.E+07          | 2.00.E+07          | 2.53.E+07          |                        |                        |                        | 7.28.E+05              |
| 1836 | Q86X55    | Histone-arginine methyltransferase CARM1 [OS=Homo sapiens]                             | 11.6          | 3            | 1          | 25     | 1                 | 256                     | 41                              | 1                                            | 1                                        | 0                |                    |                    |                    |                    |                        |                        |                        |                        |
| 1837 | O14964    | Hepatocyte growth factor-regulated tyrosine kinase substrate [OS=Homo sapiens]         | 11.6          | 4            | 2          | 62     | 2                 | 383                     | 48                              | 2                                            | 2                                        | 0                | 2.60.E+07          | 2.65.E+07          | 2.27.E+07          | 2.75.E+07          | 3.09.E+07              | 2.48.E+07              | 2.55.E+07              | 2.46.E+07              |
| 1838 | P07305    | Histone H1.0 [OS=Homo sapiens]                                                         | 11.6          | 11           | 2          | 89     | 2                 | 468                     | 107                             | 2                                            | 2                                        | 0                | 2.28.E+08          | 2.20.E+08          | 2.21.E+08          | 2.41.E+08          | 2.30.E+08              | 2.25.E+08              | 2.45.E+08              | 2.33.E+08              |
| 1839 | Q12962    | transcription initiation factor TFIID subunit 10 [OS=Homo sapiens]                     | 11.6          | 11           | 1          | 4      | 1                 | 147                     | 5                               | 1                                            | 1                                        | 0                | 2.89.E+06          | 4.39.E+06          | 1.49.E+06          | 4.91.E+06          | 6.34.E+06              | 6.24.E+06              | 6.01.E+06              | 5.26.E+06              |
| 1840 | Q9NSP4-1  | Centromere protein M [OS=Homo sapiens]                                                 | 11.6          | 12           | 1          | 24     | 1                 | 559                     | 35                              | 1                                            | 1                                        | 0                | 9.99.E+06          | 1.09.E+07          | 9.68.E+06          | 1.08.E+07          | 1.20.E+07              | 1.04.E+07              | 8.85.E+06              | 1.00.E+07              |
| 1841 | O14949    | Cytochrome b-c1 complex subunit 8 [OS=Homo sapiens]                                    | 11.6          | 35           | 3          | 80     | 3                 | 392                     | 12                              | 2                                            | 3                                        | 0                | 8.93.E+07          | 8.15.E+07          | 9.71.E+07          | 9.99.E+07          | 8.46.E+07              | 7.57.E+07              | 9.22.E+07              | 7.75.E+07              |
| 1842 | P62861    | 40S ribosomal protein S30 [OS=Homo sapiens]                                            | 11.6          | 19           | 2          | 149    | 2                 | 1106                    | 171                             | 2                                            | 2                                        | 0                | 3.92.E+08          | 3.96.E+08          | 4.34.E+08          | 3.56.E+08          | 4.29.E+08              | 4.30.E+08              | 4.70.E+08              | 4.33.E+08              |
| 1843 | Q9NYK5-1  | 39S ribosomal protein L39, mitochondrial [OS=Homo sapiens]                             | 11.5          | 8            | 2          | 38     | 2                 | 266                     | 26                              | 2                                            | 2                                        | 0                | 3.56.E+07          | 2.96.E+07          | 3.58.E+07          | 3.25.E+07          | 1.16.E+07              | 1.02.E+07              | 2.06.E+07              | 4.53.E+07              |
| 1844 | Q9UIQ6-1  | Leucyl-cystinyl aminopeptidase [OS=Homo sapiens]                                       | 11.5          | 2            | 2          | 13     | 2                 | 155                     | 9                               | 2                                            | 1                                        | 0                | 4.34.E+06          | 4.95.E+06          | 5.24.E+06          | 5.10.E+06          | 9.19.E+06              | 8.05.E+06              | 8.65.E+06              | 8.90.E+06              |
| 1845 | Q9Y6M9    | NADH dehydrogenase [ubiquinone] 1 beta subcomplex subunit 9 [OS=Homo sapiens]          | 11.5          | 22           | 3          | 32     | 3                 | 219                     | 2                               | 2                                            | 3                                        | 0                | 3.61.E+07          | 9.41.E+07          | 7.93.E+07          | 8.06.E+07          | 9.26.E+07              | 9.69.E+07              | 8.32.E+07              | 8.80.E+07              |
| 1846 | Q8NBF2-1  | NHL repeat-containing protein 2 [OS=Homo sapiens]                                      | 11.5          | 9            | 3          | 19     | 3                 | 47                      | 7                               | 3                                            | 3                                        | 0                | 1.21.E+07          | 1.09.E+07          | 9.81.E+06          | 1.03.E+07          | 4.89.E+06              | 5.81.E+06              | 4.72.E+06              | 2.20.E+06              |
| 1847 | Q92905    | COP9 signalosome complex subunit 5 [OS=Homo sapiens]                                   | 11.5          | 7            | 2          | 42     | 2                 | 157                     | 42                              | 2                                            | 2                                        | 0                | 3.98.E+07          | 3.74.E+07          | 4.09.E+07          | 3.62.E+07          | 3.81.E+07              | 4.41.E+07              | 3.25.E+07              | 4.34.E+07              |
| 1848 | P67812    | Signal peptidase complex catalytic subunit SEC11A [OS=Homo sapiens]                    | 11.5          | 11           | 2          | 100    | 2                 | 975                     | 95                              | 2                                            | 2                                        | 0                | 1.15.E+08          | 1.12.E+08          | 1.12.E+08          | 1.03.E+08          | 1.08.E+08              | 1.10.E+08              | 9.67.E+07              | 1.08.E+08              |
| 1849 | O14976    | Cyclin-G-associated kinase [OS=Homo sapiens]                                           | 11.4          | 1            | 1          | 44     | 1                 | 422                     | 16                              | 1                                            | 1                                        | 0                | 6.36.E+06          | 6.15.E+06          | 7.13.E+06          | 6.58.E+06          | 6.79.E+06              | 5.16.E+06              | 5.68.E+06              | 6.17.E+06              |
| 1850 | Q9NQW7-1  | xa-Pro aminopeptidase 1 [OS=Homo sapiens]                                              | 11.4          | 4            | 2          | 35     | 2                 | 279                     | 24                              | 2                                            | 2                                        | 0                | 1.79.E+07          | 1.73.E+07          | 8.58.E+06          | 7.80.E+06          | 2.36.E+07              | 2.05.E+07              | 1.63.E+07              | 2.17.E+07              |
| 1851 | P24821    | Tenascin [OS=Homo sapiens]                                                             | 11.4          | 2            | 2          | 8      | 2                 | 63                      | 6                               | 2                                            | 2                                        | 0                | 5.04.E+06          | 7.04.E+05          | 4.35.E+06          | 3.34.E+06          | 2.49.E+06              | 4.51.E+06              | 3.29.E+06              | 1.83.E+06              |
| 1852 | O43583    | density-regulated protein [OS=Homo sapiens]                                            | 11.4          | 21           | 3          | 49     | 3                 | 203                     | 23                              | 2                                            | 3                                        | 0                | 1.55.E+08          | 1.23.E+08          | 1.19.E+08          | 1.38.E+08          | 1.43.E+08              | 1.44.E+08              | 1.47.E+08              | 1.38.E+08              |
| 1853 | Q96S52    | GPI transamidase component PIG-S [OS=Homo sapiens]                                     | 11.4          | 9            | 2          | 28     | 2                 | 243                     | 19                              | 2                                            | 2                                        | 0                | 9.61.E+06          | 7.45.E+06          | 8.84.E+06          | 9.82.E+06          | 1.53.E+07              | 1.06.E+07              | 1.31.E+07              | 1.25.E+07              |
| 1854 | Q15427    | Splicing factor 3b subunit 4 [OS=Homo sapiens]                                         | 11.4          | 7            | 2          | 105    | 2                 | 701                     | 93                              | 2                                            | 2                                        | 0                | 4.24.E+07          | 4.62.E+07          | 4.15.E+07          | 4.37.E+07          | 3.33.E+07              | 2.98.E+07              | 1.90.E+07              | 3.10.E+07              |
| 1855 | Q9UKN8    | General transcription factor 3C polypeptide 4 [OS=Homo sapiens]                        | 11.4          | 3            | 2          | 12     | 2                 | 236                     | 12                              | 2                                            | 2                                        | 0                | 4.58.E+06          | 2.45.E+06          | 2.06.E+06          | 1.70.E+06          | 1.55.E+06              | 1.21.E+06              | 1.16.E+06              | 1.08.E+06              |
| 1856 | P19387    | DNA-directed RNA polymerase II subunit RPB3 [OS=Homo sapiens]                          | 11.4          | 13           | 2          | 42     | 2                 | 200                     | 32                              | 2                                            | 2                                        | 0                | 2.03.E+07          | 2.19.E+07          | 2.06.E+07          | 2.32.E+07          | 2.30.E+07              | 2.31.E+07              | 1.91.E+07              | 1.98.E+07              |
| 1857 | Q9UNE7-1  | E3 ubiquitin-protein ligase CHIP [OS=Homo sapiens]                                     | 11.4          | 12           | 3          | 21     | 3                 | 166                     | 18                              | 3                                            | 3                                        | 0                | 1.71.E+07          | 2.74.E+07          | 2.03.E+07          | 2.71.E+07          | 2.45.E+07              | 1.40.E+07              | 1.69.E+07              | 2.28.E+07              |
| 1858 | Q9UHY1    | Nuclear receptor-binding protein [OS=Homo sapiens]                                     | 11.4          | 5            | 2          | 16     | 2                 | 79                      | 4                               | 2                                            | 2                                        | 0                | 6.45.E+06          | 8.77.E+06          | 8.11.E+06          | 9.02.E+06          |                        |                        | 5.10.E+06              |                        |
| 1859 | Q15042-1  | Rab3 GTPase-activating protein catalytic subunit [OS=Homo sapiens]                     | 11.4          | 3            | 2          | 6      | 2                 | 31                      | 5                               | 2                                            | 2                                        | 0                | 1.75.E+07          | 1.68.E+07          | 1.80.E+07          | 1.60.E+07          | 2.27.E+07              | 2.32.E+07              | 2.11.E+07              | 2.37.E+07              |
| 1860 | O15344-1  | E3 ubiquitin-protein ligase Midline-1 [OS=Homo sapiens]                                | 11.4          | 6            | 3          | 30     | 3                 | 101                     | 4                               | 3                                            | 3                                        | 0                | 1.31.E+07          | 1.32.E+07          | 1.19.E+07          | 1.42.E+07          | 2.43.E+07              | 9.07.E+06              | 1.81.E+07              | 1.83.E+07              |
| 1861 | Q9NRP0-1  | oligosaccharyltransferase complex subunit OSTC [OS=Homo sapiens]                       | 11.4          | 8            | 1          | 64     | 1                 | 1051                    | 103                             | 1                                            | 1                                        | 0                | 8.12.E+07          | 8.46.E+07          | 8.52.E+07          | 8.56.E+07          | 9.92.E+07              | 9.35.E+07              | 4.79.E+07              | 9.55.E+07              |
| 1862 | Q9Y3B3-1  | Transmembrane emp24 domain-containing protein 7 [OS=Homo sapiens]                      | 11.3          | 10           | 2          | 64     | 2                 | 225                     | 79                              | 2                                            | 2                                        | 0                | 6.07.E+07          | 5.56.E+07          | 5.64.E+07          | 5.87.E+07          | 5.77.E+07              | 5.46.E+07              | 6.55.E+07              | 6.44.E+07              |
| 1863 | Q16698    | 2,4-dienoyl-CoA reductase, mitochondrial [OS=Homo sapiens]                             | 11.3          | 9            | 3          | 29     | 3                 | 13                      | 15                              | 3                                            | 3                                        | 0                | 1.03.E+08          | 7.54.E+07          | 1.05.E+08          | 6.72.E+07          | 9.30.E+07              | 8.43.E+07              | 1.26.E+08              | 1.21.E+08              |
| 1864 | Q9BRG1    | Vacuolar protein-sorting-associated protein 25 [OS=Homo sapiens]                       | 11.3          | 21           | 3          | 64     | 3                 | 706                     | 69                              | 3                                            | 3                                        | 0                | 3.56.E+07          | 4.16.E+07          | 3.86.E+07          | 3.68.E+07          | 6.26.E+07              | 5.78.E+07              | 5.35.E+07              | 5.84.E+07              |
| 1865 | C9JLW8    | Mapk-regulated corepressor-interacting protein 1 [OS=Homo sapiens]                     | 11.3          | 23           | 2          | 34     | 2                 | 81                      | 10                              | 2                                            | 2                                        | 0                | 7.09.E+07          | 8.52.E+07          | 2.26.E+07          | 6.84.E+07          | 7.86.E+07              | 8.38.E+07              | 5.39.E+07              | 7.78.E+07              |
| 1866 | P57088    | Transmembrane protein 33 [OS=Homo sapiens]                                             | 11.3          | 8            | 2          | 52     | 2                 | 1070                    | 81                              | 2                                            | 2                                        | 0                | 9.76.E+07          | 1.63.E+08          | 9.91.E+07          | 1.52.E+08          | 1.01.E+08              | 1.01.E+08              | 9.86.E+07              | 1.08.E+08              |
| 1867 | O43291    | Kunitz-type protease inhibitor 2 [OS=Homo sapiens]                                     | 11.2          | 8            | 2          | 18     | 2                 | 122                     | 11                              | 2                                            | 2                                        | 0                | 3.73.E+07          | 4.34.E+07          | 6.04.E+07          | 4.28.E+07          | 2.98.E+06              | 4.94.E+06              | 5.10.E+06              | 1.92.E+06              |
| 1868 | Q96I59    | probable asparagine-tRNA ligase, mitochondrial [OS=Homo sapiens]                       | 11.2          | 4            | 1          | 20     | 1                 | 289                     | 24                              | 1                                            | 1                                        | 0                | 2.08.E+07          | 3.89.E+07          | 4.23.E+07          | 4.56.E+07          | 3.10.E+07              | 3.14.E+07              | 2.97.E+07              | 2.93.E+07              |
| 1869 | O75251    | NADH dehydrogenase [ubiquinone] iron-sulfur protein 7, mitochondrial [OS=Homo sapiens] | 11.2          | 13           | 1          | 28     | 1                 | 339                     | 23                              | 1                                            | 1                                        | 0                | 1.13.E+07          | 1.01.E+07          | 1.09.E+07          | 1.19.E+07          | 6.78.E+06              | 5.21.E+06              | 5.30.E+06              | 7.20.E+06              |
| 1870 | Q15004-1  | PCNA-associated factor [OS=Homo sapiens]                                               | 11.2          | 30           | 2          | 47     | 2                 | 32                      | 16                              | 2                                            | 2                                        | 0                | 3.50.E+07          | 2.96.E+07          | 4.00.E+07          | 3.92.E+07          | 4.02.E+07              | 4.07.E+07              | 4.28.E+07              | 4.05.E+07              |
| 1871 | Q8IWX8    | Calcium homeostasis endoplasmic reticulum protein [OS=Homo sapiens]                    | 11.2          | 4            | 2          | 18     | 2                 | 145                     | 12                              | 2                                            | 2                                        | 0                | 3.45.E+07          | 3.38.E+07          | 3.60.E+07          | 3.23.E+07          | 3.71.E+07              | 2.92.E+07              | 3.11.E+07              | 3.81.E+07              |
| 1872 | Q15654-1  | thyroid receptor-interacting protein 6 [OS=Homo sapiens]                               | 11.2          | 6            | 2          | 4      | 2                 | 46                      | 4                               | 2                                            | 2                                        | 0                | 1.46.E+07          | 1.42.E+07          | 1.43.E+07          | 1.52.E+07          | 1.47.E+07              | 1.49.E+07              | 1.84.E+07              | 1.55.E+07              |



| No.  | Accession | Description                                                                                         | Sum PEP Score | Coverage [%] | # Peptides | # PSMs | # Unique Peptides | Score Mascot: A5 Mascot | Score Sequest HT: A2 Sequest HT | # Peptides (by Search Engine): A2 Sequest HT | # Peptides (by Search Engine): A5 Mascot | # Razor Peptides | ctrl Abundance s_1 | ctrl Abundance s_2 | ctrl Abundance s_3 | ctrl Abundance s_4 | JAM-A KO Abundance s_1 | JAM-A KO Abundance s_2 | JAM-A KO Abundance s_3 | JAM-A KO Abundance s_4 |
|------|-----------|-----------------------------------------------------------------------------------------------------|---------------|--------------|------------|--------|-------------------|-------------------------|---------------------------------|----------------------------------------------|------------------------------------------|------------------|--------------------|--------------------|--------------------|--------------------|------------------------|------------------------|------------------------|------------------------|
| 1873 | Q8N3C0    | Activating signal cointegrator 1 complex subunit 3 [OS=Homo sapiens]                                | 11.2          | 1            | 1          | 2      | 1                 | 55                      | 4                               | 1                                            | 1                                        | 0                | 7.81.E+06          | 1.00.E+07          | 8.67.E+06          | 1.04.E+07          |                        |                        |                        | 5.73.E+05              |
| 1874 | P49458    | Signal recognition particle 9 kDa protein [OS=Homo sapiens]                                         | 11.1          | 22           | 2          | 45     | 2                 | 520                     | 7                               | 1                                            | 2                                        | 0                | 1.80.E+08          | 1.81.E+08          | 1.90.E+08          | 1.50.E+08          | 1.72.E+08              | 1.75.E+08              | 2.01.E+08              | 1.72.E+08              |
| 1875 | Q96B26    | Exosome complex component RRP43 [OS=Homo sapiens]                                                   | 11.1          | 10           | 1          | 49     | 1                 | 436                     | 19                              | 1                                            | 1                                        | 0                | 1.29.E+07          | 1.36.E+07          | 8.02.E+06          | 1.10.E+07          | 1.23.E+07              | 1.11.E+07              | 1.41.E+07              | 1.14.E+07              |
| 1876 | P61803    | Dolichyl-diphosphooligosaccharide--protein glycosyltransferase subunit DAD1 [OS=Homo sapiens]       | 11.1          | 19           | 2          | 10     | 2                 | 116                     | 12                              | 2                                            | 2                                        | 0                | 1.00.E+08          | 1.22.E+08          | 1.06.E+08          | 1.06.E+08          | 1.38.E+08              | 1.35.E+08              | 1.31.E+08              | 1.34.E+08              |
| 1877 | P16219    | Short-chain specific acyl-CoA dehydrogenase, mitochondrial [OS=Homo sapiens]                        | 11.1          | 6            | 1          | 24     | 1                 | 556                     | 24                              | 1                                            | 1                                        | 0                | 9.26.E+06          | 7.84.E+06          | 7.45.E+06          | 6.45.E+06          | 4.14.E+06              | 5.67.E+06              | 4.72.E+06              | 5.36.E+06              |
| 1878 | P05026    | Sodium/potassium-transporting ATPase subunit beta-1 [OS=Homo sapiens]                               | 11.1          | 8            | 2          | 98     | 2                 | 761                     | 95                              | 2                                            | 2                                        | 0                | 9.50.E+07          | 8.96.E+07          | 9.94.E+07          | 1.00.E+08          | 9.21.E+07              | 9.00.E+07              | 9.46.E+07              | 8.91.E+07              |
| 1879 | O00479    | High mobility group nucleosome-binding domain-containing protein 4 [OS=Homo sapiens]                | 11.1          | 17           | 1          | 3      | 1                 | 0                       |                                 |                                              | 1                                        | 0                |                    |                    |                    |                    |                        |                        |                        |                        |
| 1880 | P11908    | ribose-phosphate pyrophosphokinase 2 [OS=Homo sapiens]                                              | 11.1          | 7            | 2          | 44     | 2                 | 191                     | 18                              | 2                                            | 2                                        | 0                | 3.16.E+07          | 1.86.E+07          | 3.27.E+07          | 1.62.E+07          | 3.87.E+07              | 4.42.E+07              | 4.48.E+07              | 4.08.E+07              |
| 1881 | Q14061    | cytochrome C oxidase copper chaperone [OS=Homo sapiens]                                             | 11.1          | 46           | 2          | 20     | 2                 | 512                     | 0                               | 1                                            | 2                                        | 0                | 1.65.E+07          | 1.56.E+07          | 1.74.E+07          | 1.91.E+07          | 1.45.E+07              | 1.49.E+07              | 1.66.E+07              | 1.36.E+07              |
| 1882 | Q9NZZ3    | Charged multivesicular body protein 5 [OS=Homo sapiens]                                             | 11.1          | 16           | 2          | 38     | 2                 | 250                     | 38                              | 2                                            | 2                                        | 0                | 1.75.E+07          | 3.53.E+07          | 3.14.E+07          | 3.61.E+07          | 4.99.E+07              | 6.05.E+07              | 4.71.E+07              | 4.98.E+07              |
| 1883 | Q8NI36    | WD repeat-containing protein 36 [OS=Homo sapiens]                                                   | 11.0          | 8            | 4          | 18     | 4                 | 39                      | 8                               | 4                                            | 4                                        | 0                | 2.76.E+07          | 2.70.E+07          | 2.42.E+07          | 2.88.E+07          | 2.71.E+07              | 2.46.E+07              | 2.45.E+07              | 2.79.E+07              |
| 1884 | Q9NRF9    | DNA polymerase epsilon subunit 3 [OS=Homo sapiens]                                                  | 11.0          | 15           | 2          | 31     | 2                 | 483                     | 0                               | 1                                            | 1                                        | 0                | 3.03.E+07          | 3.26.E+07          | 3.29.E+07          | 3.69.E+07          | 3.64.E+07              | 3.62.E+07              | 3.72.E+07              | 3.72.E+07              |
| 1885 | Q9Y639-2  | Neuroplastin [OS=Homo sapiens]                                                                      | 11.0          | 8            | 2          | 33     | 2                 | 85                      | 7                               | 2                                            | 2                                        | 0                | 5.60.E+07          | 5.45.E+07          | 5.62.E+07          | 4.87.E+07          | 5.35.E+07              | 5.85.E+07              | 5.92.E+07              | 5.67.E+07              |
| 1886 | P61964    | WD repeat-containing protein 5 [OS=Homo sapiens]                                                    | 11.0          | 8            | 2          | 15     | 2                 | 51                      | 13                              | 2                                            | 2                                        | 0                | 7.51.E+06          | 2.09.E+07          | 2.29.E+07          | 2.35.E+07          | 2.75.E+07              | 2.08.E+07              | 2.24.E+07              | 2.62.E+07              |
| 1887 | Q00577    | Transcriptional activator protein Pur-alpha [OS=Homo sapiens]                                       | 11.0          | 8            | 1          | 14     | 1                 | 193                     | 22                              | 1                                            | 1                                        | 0                | 6.67.E+06          | 1.22.E+07          | 1.47.E+07          | 1.30.E+07          | 1.20.E+07              | 1.84.E+07              | 9.55.E+06              | 9.58.E+06              |
| 1888 | P35249    | replication factor C subunit 4 [OS=Homo sapiens]                                                    | 11.0          | 11           | 3          | 12     | 3                 | 55                      | 11                              | 3                                            | 3                                        | 0                | 6.00.E+07          | 3.92.E+07          | 4.77.E+07          | 4.16.E+07          | 4.99.E+07              | 6.13.E+07              | 5.28.E+07              | 5.73.E+07              |
| 1889 | O60306    | Intron-binding protein aquarius [OS=Homo sapiens]                                                   | 11.0          | 2            | 2          | 4      | 2                 | 65                      | 3                               | 2                                            | 2                                        | 0                | 1.04.E+07          | 1.23.E+07          | 8.92.E+06          | 1.44.E+07          | 1.50.E+07              | 1.26.E+07              | 1.19.E+07              | 1.43.E+07              |
| 1890 | Q86Y56    | Dynein assembly factor 5, axonemal [OS=Homo sapiens]                                                | 10.9          | 3            | 2          | 6      | 2                 | 99                      | 5                               | 2                                            | 2                                        | 0                | 1.96.E+07          | 1.20.E+07          | 1.07.E+07          | 1.55.E+07          | 1.74.E+07              | 9.71.E+06              | 2.57.E+07              | 2.15.E+07              |
| 1891 | Q9NTZ6    | RNA-binding protein 12 [OS=Homo sapiens]                                                            | 10.9          | 4            | 4          | 22     | 4                 | 0                       | 3                               | 4                                            | 4                                        | 0                | 1.92.E+08          | 1.73.E+08          | 1.94.E+08          | 1.81.E+08          | 4.04.E+08              | 4.11.E+08              | 4.10.E+08              | 4.01.E+08              |
| 1892 | Q96LD4    | Tripartite motif-containing protein 47 [OS=Homo sapiens]                                            | 10.9          | 3            | 1          | 15     | 1                 | 258                     | 9                               | 1                                            | 1                                        | 0                | 6.27.E+06          | 4.85.E+06          | 5.63.E+06          | 4.19.E+06          | 4.68.E+06              | 3.49.E+06              | 4.18.E+06              | 3.46.E+06              |
| 1893 | Q16537    | Serine/threonine-protein phosphatase 2A 56 kDa regulatory subunit epsilon isoform [OS=Homo sapiens] | 10.9          | 7            | 3          | 16     | 2                 | 35                      | 6                               | 3                                            | 3                                        | 0                | 1.59.E+07          | 1.44.E+07          | 1.60.E+07          | 1.34.E+07          | 1.43.E+07              | 1.61.E+07              | 1.96.E+07              | 1.37.E+07              |
| 1894 | Q14657    | EKC/KEOPS complex subunit LAGE3 [OS=Homo sapiens]                                                   | 10.9          | 16           | 1          | 36     | 1                 | 390                     | 50                              | 1                                            | 1                                        | 0                | 1.94.E+07          | 1.72.E+07          | 2.09.E+07          | 2.21.E+07          | 1.87.E+07              | 1.88.E+07              | 2.23.E+07              | 2.09.E+07              |
| 1895 | Q96EY7-1  | pentatricopeptide repeat domain-containing protein 3, mitochondrial [OS=Homo sapiens]               | 10.8          | 6            | 2          | 9      | 2                 | 39                      | 2                               | 2                                            | 2                                        | 0                | 2.02.E+07          | 1.55.E+07          | 1.83.E+07          | 2.68.E+07          | 1.75.E+07              | 1.93.E+07              | 2.14.E+07              | 2.41.E+07              |
| 1896 | P62875    | DNA-directed RNA polymerases I, II, and III subunit RPABC5 [OS=Homo sapiens]                        | 10.8          | 45           | 1          | 10     | 1                 | 128                     | 16                              | 1                                            | 1                                        | 0                | 7.34.E+06          | 9.27.E+06          | 8.02.E+06          | 7.71.E+06          |                        |                        | 2.76.E+06              | 3.69.E+06              |
| 1897 | Q9Y2Q5    | Ragulator complex protein LAMTOR2 [OS=Homo sapiens]                                                 | 10.8          | 12           | 1          | 2      | 1                 | 76                      | 4                               | 1                                            | 1                                        | 0                |                    |                    |                    |                    |                        |                        |                        |                        |
| 1898 | Q14192    | Four and a half LIM domains protein 2 [OS=Homo sapiens]                                             | 10.8          | 24           | 4          | 27     | 4                 | 37                      | 2                               | 4                                            | 3                                        | 0                | 1.50.E+07          | 1.76.E+07          | 1.66.E+07          | 1.31.E+07          | 2.49.E+07              | 2.44.E+07              | 2.49.E+07              | 2.57.E+07              |
| 1899 | P10398-1  | serine/threonine-protein kinase A-Raf [OS=Homo sapiens]                                             | 10.7          | 3            | 1          | 24     | 1                 | 425                     | 35                              | 1                                            | 1                                        | 0                | 1.34.E+07          | 1.43.E+07          | 1.36.E+07          | 6.92.E+06          | 1.89.E+07              | 1.67.E+07              | 1.39.E+07              | 1.51.E+07              |
| 1900 | P54687    | Branched-chain-amino-acid aminotransferase, cytosolic [OS=Homo sapiens]                             | 10.7          | 13           | 2          | 62     | 2                 | 550                     | 37                              | 2                                            | 2                                        | 0                | 1.80.E+07          | 1.99.E+07          | 1.62.E+07          | 1.85.E+07          | 2.34.E+07              | 2.18.E+07              | 1.91.E+07              | 2.16.E+07              |
| 1901 | P57740    | Nuclear pore complex protein Nup107 [OS=Homo sapiens]                                               | 10.7          | 5            | 3          | 34     | 3                 | 121                     | 5                               | 2                                            | 3                                        | 0                | 7.65.E+06          | 1.54.E+07          | 6.90.E+06          | 1.64.E+07          | 2.18.E+07              | 2.05.E+07              | 1.95.E+07              | 5.56.E+06              |
| 1902 | O00267    | Transcription elongation factor Spt5 [OS=Homo sapiens]                                              | 10.7          | 2            | 2          | 24     | 2                 | 48                      | 20                              | 2                                            | 2                                        | 0                | 1.74.E+07          | 1.35.E+07          | 1.51.E+07          | 1.69.E+07          | 9.90.E+06              | 1.17.E+07              | 9.55.E+06              | 1.42.E+07              |
| 1903 | Q9NUP9    | Protein lin-7 homolog C [OS=Homo sapiens]                                                           | 10.6          | 11           | 2          | 46     | 2                 | 347                     | 50                              | 2                                            | 2                                        | 0                | 8.78.E+07          | 8.40.E+07          | 6.36.E+07          | 6.27.E+07          | 9.39.E+07              | 6.23.E+07              | 1.02.E+08              | 5.74.E+07              |
| 1904 | Q9H2M9    | Rab3 GTPase-activating protein non-catalytic subunit [OS=Homo sapiens]                              | 10.6          | 2            | 2          | 18     | 2                 | 63                      | 9                               | 2                                            | 2                                        | 0                | 9.04.E+06          | 8.67.E+06          | 1.08.E+07          | 1.38.E+07          | 2.12.E+07              | 1.64.E+07              | 1.46.E+07              | 2.05.E+07              |
| 1905 | P46937-1  | Transcriptional coactivator YAP1 [OS=Homo sapiens]                                                  | 10.6          | 7            | 2          | 39     | 2                 | 162                     | 41                              | 2                                            | 2                                        | 0                | 5.64.E+07          | 4.27.E+07          | 3.45.E+07          | 4.38.E+07          | 4.59.E+07              | 4.60.E+07              | 4.49.E+07              | 4.29.E+07              |
| 1906 | P51553-1  | isocitrate dehydrogenase [NAD] subunit gamma, mitochondrial [OS=Homo sapiens]                       | 10.6          | 5            | 2          | 36     | 2                 | 96                      | 47                              | 2                                            | 2                                        | 0                | 5.37.E+07          | 5.63.E+07          | 5.54.E+07          | 5.51.E+07          | 5.49.E+07              | 5.23.E+07              | 5.97.E+07              | 5.82.E+07              |
| 1907 | P31937    | 3-hydroxyisobutyrate dehydrogenase, mitochondrial [OS=Homo sapiens]                                 | 10.6          | 4            | 1          | 6      | 1                 | 106                     | 11                              | 1                                            | 1                                        | 0                | 1.62.E+07          | 1.97.E+07          | 1.64.E+07          | 1.68.E+07          | 2.13.E+07              | 2.68.E+07              | 1.89.E+07              | 2.06.E+07              |
| 1908 | Q07812    | Apoptosis regulator BAX [OS=Homo sapiens]                                                           | 10.6          | 7            | 1          | 44     | 1                 | 987                     | 82                              | 1                                            | 1                                        | 0                | 3.89.E+07          | 4.44.E+07          | 4.38.E+07          | 4.61.E+07          | 4.61.E+07              | 3.86.E+07              | 1.25.E+07              | 3.30.E+07              |
| 1909 | O60493-1  | sorting nexin-3 [OS=Homo sapiens]                                                                   | 10.6          | 15           | 3          | 110    | 2                 | 100                     | 49                              | 3                                            | 3                                        | 1                | 1.00.E+08          | 9.72.E+07          | 1.07.E+08          | 8.54.E+07          | 9.37.E+07              | 1.02.E+08              | 1.15.E+08              | 1.04.E+08              |
| 1910 | P84095    | Rho-related GTP-binding protein RhoG [OS=Homo sapiens]                                              | 10.6          | 13           | 2          | 20     | 1                 | 130                     | 23                              | 2                                            | 2                                        | 0                |                    |                    |                    |                    |                        |                        |                        |                        |
| 1911 | O60344-4  | Isoform D of Endothelin-converting enzyme 2 [OS=Homo sapiens]                                       | 10.6          | 13           | 1          | 22     | 1                 | 217                     | 25                              | 1                                            | 1                                        | 0                | 9.40.E+06          | 1.07.E+07          | 9.02.E+06          | 1.09.E+07          | 1.14.E+07              | 1.02.E+07              | 9.98.E+06              | 1.12.E+07              |
| 1912 | Q14CX7-1  | N-alpha-acetyltransferase 25, NatB auxiliary subunit [OS=Homo sapiens]                              | 10.6          | 2            | 2          | 12     | 2                 | 140                     | 7                               | 2                                            | 2                                        | 0                | 1.62.E+07          | 1.96.E+07          | 1.57.E+07          | 1.81.E+07          | 1.71.E+07              | 1.80.E+07              | 1.36.E+07              | 1.83.E+07              |
| 1913 | O60573    | eukaryotic translation initiation factor 4E type 2 [OS=Homo sapiens]                                | 10.6          | 11           | 2          | 28     | 2                 | 217                     | 2                               | 2                                            | 2                                        | 0                | 1.86.E+07          | 1.86.E+07          | 2.05.E+07          | 1.61.E+07          | 1.51.E+07              | 1.56.E+07              | 1.49.E+07              | 1.70.E+07              |
| 1914 | P82930    | 28S ribosomal protein S34, mitochondrial [OS=Homo sapiens]                                          | 10.5          | 11           | 2          | 52     | 2                 | 441                     | 30                              | 2                                            | 2                                        | 0                | 2.75.E+07          | 2.85.E+07          | 2.79.E+07          | 2.62.E+07          | 1.61.E+07              | 1.63.E+07              | 1.69.E+07              | 1.51.E+07              |
| 1915 | Q9NVI1-3  | Fanconi anemia group I protein [OS=Homo sapiens]                                                    | 10.5          | 2            | 3          | 58     | 2                 | 335                     | 11                              | 3                                            | 2                                        | 0                | 4.86.E+06          | 6.10.E+06          | 4.61.E+06          | 7.79.E+06          | 1.69.E+07              | 1.53.E+07              | 1.27.E+07              | 1.41.E+07              |
| 1916 | O60925    | prefoldin subunit 1 [OS=Homo sapiens]                                                               | 10.5          | 17           | 2          | 42     | 2                 | 308                     | 29                              | 2                                            | 2                                        | 0                | 9.73.E+07          | 8.82.E+07          | 9.75.E+07          | 1.08.E+08          | 8.55.E+07              | 8.34.E+07              | 8.22.E+07              | 8.24.E+07              |
| 1917 | P53801    | pituitary tumor-transforming gene 1 protein-interacting protein [OS=Homo sapiens]                   | 10.5          | 10           | 1          | 56     | 1                 | 725                     | 75                              | 1                                            | 1                                        | 0                | 5.14.E+07          | 1.91.E+07          | 6.22.E+07          | 4.01.E+07          | 8.96.E+07              | 5.84.E+07              | 8.63.E+07              | 3.71.E+07              |
| 1918 | A0FGR8-1  | Extended synaptotagmin-2 [OS=Homo sapiens]                                                          | 10.5          | 6            | 3          | 22     | 3                 | 38                      | 11                              | 3                                            | 3                                        | 0                | 2.52.E+07          | 1.72.E+07          | 1.17.E+07          | 1.61.E+07          | 2.90.E+07              | 2.61.E+07              | 2.51.E+07              | 3.97.E+07              |
| 1919 | Q9UBI6    | guanine nucleotide-binding protein g(i)/g(s)/g(o) subunit gamma-12 [OS=Homo sapiens]                | 10.5          | 22           | 1          | 24     | 1                 | 230                     | 46                              | 1                                            | 1                                        | 0                | 6.52.E+07          | 5.83.E+07          | 5.78.E+07          | 6.93.E+07          | 5.12.E+07              | 5.42.E+07              | 3.55.E+07              | 5.56.E+07              |
| 1920 | A5YKK6    | CCR4-NOT transcription complex subunit 1 [OS=Homo sapiens]                                          | 10.5          | 1            | 2          | 8      | 2                 | 95                      | 10                              | 2                                            | 2                                        | 0                | 1.55.E+07          | 1.64.E+07          | 1.49.E+07          | 2.07.E+07          | 2.17.E+07              | 2.25.E+07              | 1.83.E+07              | 2.04.E+07              |
| 1921 | Q05D32    | CTD small phosphatase-like protein 2 [OS=Homo sapiens]                                              | 10.5          | 6            | 2          | 20     | 2                 | 60                      | 2                               | 2                                            | 2                                        | 0                | 1.74.E+07          | 1.82.E+07          | 1.70.E+07          | 1.73.E+07          | 1.64.E+07              | 1.78.E+07              | 1.91.E+07              | 1.98.E+07              |

| No.  | Accession | Description                                                                                  | Sum PEP Score | Coverage [%] | # Peptides | # PSMs | # Unique Peptides | Score Mascot: A5 Mascot | Score Sequest HT: A2 Sequest HT | # Peptides (by Search Engine): A2 Sequest HT | # Peptides (by Search Engine): A5 Mascot | # Razor Peptides | ctrl Abundance s_1 | ctrl Abundance s_2 | ctrl Abundance s_3 | ctrl Abundance s_4 | JAM-A KO Abundance s_1 | JAM-A KO Abundance s_2 | JAM-A KO Abundance s_3 | JAM-A KO Abundance s_4 |
|------|-----------|----------------------------------------------------------------------------------------------|---------------|--------------|------------|--------|-------------------|-------------------------|---------------------------------|----------------------------------------------|------------------------------------------|------------------|--------------------|--------------------|--------------------|--------------------|------------------------|------------------------|------------------------|------------------------|
| 1922 | Q9NX62    | Inositol monophosphatase 3 [OS=Homo sapiens]                                                 | 10.4          | 7            | 1          | 20     | 1                 | 182                     | 24                              | 1                                            | 1                                        | 0                | 1.05.E+07          | 1.12.E+07          | 9.53.E+06          | 1.06.E+07          | 1.43.E+07              | 1.57.E+07              | 1.24.E+07              | 8.55.E+06              |
| 1923 | Q9Y4Y9    | U6 snRNA-associated Sm-like protein LSM5 OS=Homo sapiens OX=9606 GN=LSM5 PE=1 SV=3           | 10.4          | 21           | 1          | 21     | 1                 | 315                     |                                 |                                              | 1                                        | 0                | 1.92.E+07          | 2.34.E+07          | 1.84.E+07          | 2.26.E+07          | 3.90.E+07              | 4.01.E+07              | 3.40.E+07              | 3.51.E+07              |
| 1924 | P55039    | Developmentally-regulated GTP-binding protein 2 [OS=Homo sapiens]                            | 10.4          | 8            | 2          | 14     | 2                 | 108                     | 11                              | 2                                            | 2                                        | 0                | 9.86.E+06          | 9.44.E+06          | 1.07.E+07          | 9.19.E+06          | 1.25.E+07              | 1.14.E+07              | 1.16.E+07              | 1.09.E+07              |
| 1925 | Q3MHD2    | Protein LSM12 homolog [OS=Homo sapiens]                                                      | 10.4          | 12           | 1          | 48     | 1                 | 686                     | 37                              | 1                                            | 1                                        | 0                | 1.38.E+07          | 1.61.E+07          | 1.26.E+07          | 1.64.E+07          | 1.37.E+07              | 2.21.E+07              | 2.17.E+07              | 2.41.E+07              |
| 1926 | Q9Y221-1  | 60S ribosome subunit biogenesis protein NIP7 homolog [OS=Homo sapiens]                       | 10.3          | 21           | 2          | 17     | 2                 | 114                     | 24                              | 2                                            | 1                                        | 0                | 4.14.E+07          | 4.45.E+07          | 4.55.E+07          | 3.87.E+07          | 3.29.E+07              | 4.43.E+07              | 4.60.E+07              | 4.46.E+07              |
| 1927 | P57081-1  | tRNA (guanine-N(7)-)-methyltransferase non-catalytic subunit WDR4 [OS=Homo sapiens]          | 10.3          | 8            | 2          | 8      | 2                 | 169                     | 9                               | 2                                            | 2                                        | 0                | 2.32.E+07          | 2.76.E+07          | 2.47.E+07          | 2.56.E+07          | 2.43.E+07              | 2.95.E+07              | 2.56.E+07              | 2.42.E+07              |
| 1928 | Q86X29    | Lipolysis-stimulated lipoprotein receptor [OS=Homo sapiens]                                  | 10.3          | 4            | 2          | 39     | 2                 | 463                     | 35                              | 2                                            | 2                                        | 0                | 2.70.E+07          | 2.89.E+07          | 2.84.E+07          | 2.44.E+07          | 2.46.E+07              | 4.71.E+06              | 2.31.E+07              | 2.83.E+07              |
| 1929 | Q9NR56-1  | Muscleblind-like protein 1 [OS=Homo sapiens]                                                 | 10.3          | 8            | 2          | 13     | 2                 | 34                      | 15                              | 2                                            | 2                                        | 0                | 2.97.E+07          | 3.03.E+07          | 3.08.E+07          | 3.04.E+07          | 2.54.E+07              | 2.70.E+07              | 2.02.E+07              | 2.57.E+07              |
| 1930 | Q9Y3A6-1  | Transmembrane emp24 domain-containing protein 5 [OS=Homo sapiens]                            | 10.3          | 10           | 1          | 16     | 1                 | 247                     | 4                               | 1                                            | 1                                        | 0                | 1.06.E+07          | 1.05.E+07          | 9.91.E+06          | 9.65.E+06          | 4.86.E+06              | 3.30.E+06              | 2.97.E+06              | 3.75.E+06              |
| 1931 | Q9NWW5    | ceroid-lipofuscinosis neuronal protein 6 [OS=Homo sapiens]                                   | 10.3          | 7            | 1          | 18     | 1                 | 110                     | 38                              | 1                                            | 1                                        | 0                | 2.27.E+07          | 2.76.E+07          | 2.32.E+07          | 2.09.E+07          | 3.29.E+07              | 3.41.E+07              | 3.68.E+07              | 3.28.E+07              |
| 1932 | Q969S3    | Zinc finger protein 622 [OS=Homo sapiens]                                                    | 10.3          | 3            | 1          | 36     | 1                 | 713                     | 52                              | 1                                            | 1                                        | 0                | 4.92.E+06          | 5.46.E+06          | 3.61.E+06          | 5.30.E+06          | 9.11.E+06              | 7.94.E+06              | 6.40.E+06              | 9.27.E+06              |
| 1933 | Q13242    | serine/arginine-rich splicing factor 9 [OS=Homo sapiens]                                     | 10.3          | 15           | 3          | 46     | 3                 | 105                     | 37                              | 3                                            | 3                                        | 0                | 5.49.E+07          | 5.40.E+07          | 5.48.E+07          | 5.10.E+07          | 5.87.E+07              | 6.83.E+07              | 6.58.E+07              | 6.47.E+07              |
| 1934 | Q9H9Q4-1  | non-homologous end-joining factor 1 [OS=Homo sapiens]                                        | 10.2          | 7            | 1          | 46     | 1                 | 243                     | 21                              | 1                                            | 1                                        | 0                | 1.72.E+07          | 1.92.E+07          | 1.73.E+07          | 2.06.E+07          | 1.10.E+07              | 1.28.E+07              | 1.23.E+07              | 1.01.E+07              |
| 1935 | P35269    | General transcription factor iif subunit 1 [OS=Homo sapiens]                                 | 10.2          | 3            | 1          | 2      | 1                 | 91                      |                                 |                                              | 1                                        | 0                | 6.93.E+06          | 8.26.E+06          | 7.72.E+06          | 8.59.E+06          | 1.36.E+07              | 1.25.E+07              | 1.14.E+07              | 1.27.E+07              |
| 1936 | Q8WVY3    | U4/U6 small nuclear ribonucleoprotein Prp31 [OS=Homo sapiens]                                | 10.2          | 3            | 1          | 36     | 1                 | 443                     | 41                              | 1                                            | 1                                        | 0                | 2.14.E+07          | 2.58.E+07          | 2.03.E+07          | 4.14.E+06          | 2.35.E+07              | 2.26.E+07              | 1.13.E+07              | 1.54.E+07              |
| 1937 | Q8NHF5    | Nucleoporin NUP53 [OS=Homo sapiens]                                                          | 10.2          | 6            | 1          | 4      | 1                 | 99                      | 6                               | 1                                            | 1                                        | 0                | 5.26.E+06          | 5.76.E+06          | 1.57.E+06          | 5.94.E+06          | 9.68.E+06              | 1.03.E+07              | 5.94.E+06              | 1.25.E+07              |
| 1938 | Q9UIG0    | Tyrosine-protein kinase BAZ1B [OS=Homo sapiens]                                              | 10.1          | 3            | 3          | 16     | 3                 | 21                      | 2                               | 3                                            | 3                                        | 0                | 3.47.E+07          | 3.28.E+07          | 3.49.E+07          | 2.94.E+07          | 3.10.E+07              | 2.83.E+07              | 2.66.E+07              | 3.14.E+07              |
| 1939 | P48960-1  | CD97 antigen [OS=Homo sapiens]                                                               | 10.1          | 2            | 1          | 46     | 1                 | 712                     | 13                              | 1                                            | 1                                        | 0                | 1.21.E+07          | 1.34.E+07          | 1.09.E+07          | 1.54.E+07          | 1.29.E+07              | 1.21.E+07              | 9.09.E+06              | 1.18.E+07              |
| 1940 | Q08499-1  | cAMP-specific 3',5'-cyclic phosphodiesterase 4D [OS=Homo sapiens]                            | 10.1          | 3            | 1          | 14     | 1                 | 189                     | 27                              | 1                                            | 1                                        | 0                | 1.15.E+07          | 1.31.E+07          | 1.14.E+07          | 1.46.E+07          | 1.05.E+07              | 2.21.E+07              | 1.06.E+07              | 1.19.E+07              |
| 1941 | Q9H299    | SH3 domain-binding glutamic acid-rich-like protein 3 [OS=Homo sapiens]                       | 10.1          | 31           | 2          | 36     | 2                 | 187                     | 52                              | 2                                            | 2                                        | 0                | 3.55.E+07          | 3.76.E+07          | 4.41.E+07          | 3.19.E+06          | 3.59.E+07              | 3.46.E+07              | 4.11.E+07              | 3.91.E+07              |
| 1942 | Q8WZAO    | Protein LZIC [OS=Homo sapiens]                                                               | 10.1          | 12           | 1          | 12     | 1                 | 254                     | 9                               | 1                                            | 1                                        | 0                | 7.18.E+06          | 6.12.E+06          | 5.74.E+06          | 4.21.E+06          | 1.47.E+07              | 1.09.E+07              | 1.11.E+07              | 1.25.E+07              |
| 1943 | P37235    | Hippocalcin-like protein 1 [OS=Homo sapiens]                                                 | 10.0          | 9            | 2          | 78     | 2                 | 334                     | 71                              | 2                                            | 2                                        | 0                | 6.83.E+07          | 6.59.E+07          | 6.84.E+07          | 6.21.E+07          | 1.22.E+08              | 1.26.E+08              | 1.38.E+08              | 1.38.E+08              |
| 1944 | Q9NWS0-1  | PIH1 domain-containing protein 1 [OS=Homo sapiens]                                           | 10.0          | 18           | 2          | 6      | 2                 | 39                      | 3                               | 2                                            | 2                                        | 0                | 2.15.E+07          | 2.11.E+07          | 2.13.E+07          | 2.30.E+07          | 2.89.E+07              | 2.75.E+07              | 2.20.E+07              | 2.64.E+07              |
| 1945 | Q96P48-6  | Arf-GAP with Rho-GAP domain, ANK repeat and PH domain-containing protein 1 [OS=Homo sapiens] | 10.0          | 1            | 1          | 3      | 1                 | 116                     |                                 |                                              | 1                                        | 0                |                    | 7.97.E+06          | 5.31.E+06          | 5.74.E+06          | 3.72.E+06              | 2.93.E+06              | 2.55.E+06              | 1.91.E+06              |
| 1946 | Q9P253    | Vacuolar protein sorting-associated protein 18 homolog [OS=Homo sapiens]                     | 10.0          | 4            | 2          | 38     | 2                 | 126                     | 14                              | 2                                            | 2                                        | 0                | 1.54.E+07          | 1.98.E+07          | 1.62.E+07          | 1.42.E+07          | 1.44.E+07              | 1.16.E+07              | 2.48.E+07              | 1.83.E+07              |
| 1947 | Q9Y5J7    | Mitochondrial import inner membrane translocase subunit Tim9 [OS=Homo sapiens]               | 10.0          | 30           | 2          | 28     | 2                 | 160                     | 20                              | 2                                            | 2                                        | 0                | 3.03.E+07          | 3.14.E+07          | 3.08.E+07          | 2.59.E+07          | 2.66.E+07              | 3.07.E+07              | 2.94.E+07              | 3.10.E+07              |
| 1948 | O95159    | Zinc finger protein-like 1 [OS=Homo sapiens]                                                 | 10.0          | 10           | 3          | 22     | 3                 | 31                      | 8                               | 3                                            | 3                                        | 0                | 7.10.E+07          | 6.54.E+07          | 6.91.E+07          | 7.74.E+07          | 7.80.E+07              | 6.82.E+07              | 7.72.E+07              | 6.79.E+07              |
| 1949 | Q14643-1  | Inositol 1,4,5-trisphosphate receptor type 1 [OS=Homo sapiens]                               | 10.0          | 1            | 2          | 16     | 2                 | 163                     | 7                               | 2                                            | 2                                        | 0                | 9.03.E+06          | 6.78.E+06          | 9.04.E+06          | 6.90.E+06          | 1.71.E+07              | 1.92.E+07              | 1.58.E+07              | 1.65.E+07              |
| 1950 | Q00169    | Phosphatidylinositol transfer protein alpha isoform [OS=Homo sapiens]                        | 10.0          | 11           | 4          | 86     | 1                 | 158                     | 72                              | 4                                            | 3                                        | 0                | 7.83.E+07          | 5.21.E+07          | 6.96.E+07          | 8.77.E+07          | 5.13.E+07              | 5.84.E+07              | 7.17.E+07              | 6.38.E+07              |
| 1951 | P83881    | 60S ribosomal protein L36a [OS=Homo sapiens]                                                 | 9.9           | 18           | 2          | 49     | 2                 | 114                     | 41                              | 2                                            | 2                                        | 0                | 7.11.E+07          | 6.72.E+07          | 8.32.E+07          | 8.19.E+07          | 4.65.E+07              | 4.95.E+07              | 5.68.E+07              | 4.99.E+07              |
| 1952 | P80303    | Nucleobindin-2 [OS=Homo sapiens]                                                             | 9.9           | 7            | 2          | 21     | 2                 |                         | 21                              | 2                                            | 0                                        | 0                | 2.14.E+07          | 2.14.E+07          | 2.06.E+07          | 2.23.E+07          | 4.62.E+07              | 4.06.E+07              | 3.78.E+07              | 4.06.E+07              |
| 1953 | O15305    | Phosphomannomutase 2 [OS=Homo sapiens]                                                       | 9.9           | 8            | 1          | 4      | 1                 | 103                     |                                 |                                              | 1                                        | 0                | 6.37.E+06          | 1.16.E+07          | 8.89.E+06          | 1.22.E+07          |                        | 3.90.E+06              |                        |                        |
| 1954 | P18858    | DNA ligase 1 [OS=Homo sapiens]                                                               | 9.9           | 2            | 1          | 43     | 1                 | 635                     | 39                              | 1                                            | 1                                        | 0                | 9.58.E+06          | 1.11.E+07          | 1.04.E+07          | 1.12.E+07          | 9.55.E+06              | 9.06.E+06              | 6.28.E+06              | 8.11.E+06              |
| 1955 | O00154    | cytosolic acyl coenzyme A thioester hydrolase [OS=Homo sapiens]                              | 9.9           | 6            | 2          | 52     | 2                 | 284                     | 59                              | 2                                            | 2                                        | 0                | 4.78.E+07          | 5.92.E+07          | 5.15.E+07          | 7.38.E+07          | 1.30.E+07              | 4.51.E+07              | 4.22.E+07              | 5.19.E+07              |
| 1956 | Q9GZP9    | Derlin-2 [OS=Homo sapiens]                                                                   | 9.9           | 13           | 1          | 12     | 1                 | 72                      | 16                              | 1                                            | 1                                        | 0                | 1.91.E+07          | 2.44.E+07          | 2.10.E+07          | 2.36.E+07          | 1.38.E+07              | 1.85.E+07              | 1.20.E+07              | 1.59.E+07              |
| 1957 | Q13586    | stromal interaction molecule 1 [OS=Homo sapiens]                                             | 9.9           | 5            | 2          | 14     | 2                 | 74                      | 10                              | 2                                            | 2                                        | 0                | 6.68.E+06          | 6.92.E+06          | 7.50.E+06          | 7.12.E+06          | 4.78.E+06              | 4.60.E+06              | 5.87.E+06              | 5.35.E+06              |
| 1958 | Q7L5N1    | COP9 signalosome complex subunit 6 [OS=Homo sapiens]                                         | 9.9           | 20           | 4          | 34     | 4                 | 21                      | 51                              | 3                                            | 4                                        | 0                | 1.08.E+08          | 1.09.E+08          | 1.10.E+08          | 9.53.E+07          | 9.96.E+07              | 1.13.E+08              | 1.12.E+08              | 9.75.E+07              |
| 1959 | P35754    | Glutaredoxin-1 [OS=Homo sapiens]                                                             | 9.9           | 27           | 1          | 4      | 1                 | 110                     | 6                               | 1                                            | 1                                        | 0                | 1.05.E+06          | 2.21.E+06          | 6.86.E+05          | 2.13.E+06          | 2.31.E+06              | 5.87.E+06              | 4.56.E+06              | 2.17.E+06              |
| 1960 | Q8TEQ8-1  | GPI ethanolamine phosphate transferase 3 [OS=Homo sapiens]                                   | 9.9           | 2            | 1          | 36     | 1                 | 460                     | 2                               | 1                                            | 1                                        | 0                | 3.85.E+06          | 3.32.E+06          | 3.60.E+06          | 3.01.E+06          | 3.80.E+06              | 2.97.E+06              | 2.93.E+06              | 3.71.E+06              |
| 1961 | Q9BY43    | Charged multivesicular body protein 4a [OS=Homo sapiens]                                     | 9.9           | 6            | 1          | 14     | 1                 | 297                     | 19                              | 1                                            | 1                                        | 0                | 1.21.E+07          | 1.59.E+07          | 1.24.E+07          | 1.57.E+07          | 1.54.E+07              | 1.47.E+07              | 1.80.E+07              | 1.50.E+07              |
| 1962 | Q92882    | osteoclast-stimulating factor 1 [OS=Homo sapiens]                                            | 9.8           | 6            | 1          | 38     | 1                 | 707                     | 43                              | 1                                            | 1                                        | 0                | 1.45.E+07          | 2.05.E+07          | 1.48.E+07          | 1.88.E+07          | 2.20.E+07              | 2.11.E+07              | 1.86.E+07              | 2.00.E+07              |
| 1963 | O14561    | Acyl carrier protein, mitochondrial [OS=Homo sapiens]                                        | 9.8           | 12           | 2          | 20     | 2                 | 85                      | 19                              | 2                                            | 2                                        | 0                | 6.75.E+07          | 8.62.E+07          | 4.06.E+07          | 8.08.E+07          | 5.51.E+07              | 4.99.E+07              | 3.91.E+07              | 5.48.E+07              |
| 1964 | P24928    | DNA-directed RNA polymerase II subunit RPB1 [OS=Homo sapiens]                                | 9.8           | 3            | 2          | 16     | 2                 | 151                     | 3                               | 2                                            | 2                                        | 0                | 7.32.E+06          | 5.06.E+06          | 6.12.E+06          | 7.51.E+06          | 5.34.E+06              | 5.78.E+06              | 5.94.E+06              | 4.91.E+06              |
| 1965 | P55854    | Small ubiquitin-related modifier 3 [OS=Homo sapiens]                                         | 9.8           | 12           | 1          | 88     | 1                 | 2142                    | 126                             | 1                                            | 1                                        | 0                | 4.42.E+08          | 3.50.E+08          | 4.48.E+08          | 4.34.E+08          | 3.87.E+08              | 3.52.E+08              | 3.91.E+08              | 3.57.E+08              |
| 1966 | Q8NDI1    | EH domain-binding protein 1 [OS=Homo sapiens]                                                | 9.7           | 1            | 1          | 48     | 1                 | 660                     | 25                              | 1                                            | 1                                        | 0                | 6.46.E+06          | 6.67.E+06          | 5.86.E+06          | 6.35.E+06          | 1.01.E+07              | 7.55.E+06              | 7.32.E+06              | 8.00.E+06              |
| 1967 | Q16850-1  | lanosterol 14-alpha demethylase [OS=Homo sapiens]                                            | 9.7           | 4            | 1          | 30     | 1                 | 260                     | 36                              | 1                                            | 1                                        | 0                | 9.56.E+06          | 1.08.E+07          | 1.21.E+07          | 1.06.E+07          | 1.22.E+07              | 1.00.E+07              | 8.67.E+06              | 8.91.E+06              |
| 1968 | Q15287-1  | RNA-binding protein with serine-rich domain 1 [OS=Homo sapiens]                              | 9.7           | 5            | 1          | 32     | 1                 | 655                     | 48                              | 1                                            | 1                                        | 0                | 4.08.E+07          | 3.86.E+07          | 4.36.E+07          | 4.04.E+07          | 4.31.E+07              | 4.13.E+07              | 3.71.E+07              | 3.88.E+07              |
| 1969 | P14635    | G2/mitotic-specific cyclin-B1 [OS=Homo sapiens]                                              | 9.7           | 4            | 1          | 18     | 1                 | 163                     | 18                              | 1                                            | 1                                        | 0                | 1.25.E+07          | 1.11.E+07          | 1.20.E+07          | 1.04.E+07          | 7.17.E+06              | 7.79.E+06              | 4.76.E+06              | 8.16.E+06              |
| 1970 | Q9BUQ8    | Probable ATP-dependent RNA helicase DDX23 [OS=Homo sapiens]                                  | 9.7           | 3            | 2          | 9      | 2                 | 34                      | 10                              | 2                                            | 2                                        | 0                | 1.93.E+07          | 1.86.E+07          | 2.09.E+07          | 1.98.E+07          | 2.07.E+07              | 1.95.E+07              | 2.42.E+07              | 2.17.E+07              |
| 1971 | P29317    | Ephrin type-A receptor 2 [OS=Homo sapiens]                                                   | 9.7           | 4            | 3          | 11     | 3                 | 29                      | 5                               | 3                                            | 3                                        | 0                | 1.82.E+07          | 1.82.E+07          | 1.94.E+07          | 1.63.E+07          |                        |                        | 7.11.E+06              | 1.09.E+07              |
| 1972 | Q9UIA9    | exportin-7 [OS=Homo sapiens]                                                                 | 9.7           | 1            | 1          | 47     | 1                 | 501                     | 35                              | 1                                            | 1                                        | 0                | 1.69.E+07          | 1.61.E+07          | 9.77.E+06          | 1.49.E+07          | 6.44.E+06              | 1.17.E+07              | 5.55.E+06              | 1.13.E+07              |
| 1973 | O95297-1  | Myelin protein zero-like protein 1 [OS=Homo sapiens]                                         | 9.7           | 6            | 1          | 14     | 1                 | 360                     | 16                              | 1                                            | 1                                        | 0                | 4.51.E+06          | 4.80.E+06          | 5.45.E+06          | 4.76.E+06          | 9.21.E+06              | 9.41.E+06              | 9.54.E+06              | 1.02.E+07              |

| No.  | Accession | Description                                                                     | Sum PEP Score | Coverage [%] | # Peptides | # PSMs | # Unique Peptides | Score Mascot: A5 Mascot | Score Sequest HT: A2 Sequest HT | # Peptides (by Search Engine): A2 Sequest HT | # Peptides (by Search Engine): A5 Mascot | # Razor Peptides | ctrl Abundance_s_1 | ctrl Abundance_s_2 | ctrl Abundance_s_3 | ctrl Abundance_s_4 | JAM-A KO Abundance_s_1 | JAM-A KO Abundance_s_2 | JAM-A KO Abundance_s_3 | JAM-A KO Abundance_s_4 |
|------|-----------|---------------------------------------------------------------------------------|---------------|--------------|------------|--------|-------------------|-------------------------|---------------------------------|----------------------------------------------|------------------------------------------|------------------|--------------------|--------------------|--------------------|--------------------|------------------------|------------------------|------------------------|------------------------|
| 1974 | Q6P1X6    | UPF0598 protein C8orf82 [OS=Homo sapiens]                                       | 9.7           | 8            | 1          | 14     | 1                 | 379                     | 17                              | 1                                            | 1                                        | 0                | 1.06.E+07          | 8.56.E+06          | 7.05.E+06          | 8.89.E+06          |                        |                        |                        |                        |
| 1975 | Q9UBH6    | Xenotropic and polytropic retrovirus receptor 1 [OS=Homo sapiens]               | 9.7           | 4            | 2          | 12     | 2                 | 46                      | 3                               | 2                                            | 2                                        | 0                | 3.77.E+06          | 3.79.E+06          | 4.33.E+06          | 3.25.E+06          | 5.18.E+06              | 5.57.E+06              | 5.86.E+06              | 5.31.E+06              |
| 1976 | Q9BZH6    | WD repeat-containing protein 11 [OS=Homo sapiens]                               | 9.6           | 1            | 1          | 28     | 1                 | 517                     | 29                              | 1                                            | 1                                        | 0                | 7.10.E+06          | 7.41.E+06          | 6.34.E+06          | 6.53.E+06          | 8.04.E+06              | 7.29.E+06              | 6.51.E+06              | 6.98.E+06              |
| 1977 | Q8NEZ5-1  | F-box only protein 22 [OS=Homo sapiens]                                         | 9.6           | 5            | 1          | 6      | 1                 | 56                      | 10                              | 1                                            | 1                                        | 0                | 8.47.E+06          | 6.96.E+06          | 5.37.E+06          | 1.52.E+07          | 1.41.E+07              | 9.29.E+06              | 1.38.E+07              |                        |
| 1978 | Q9UGV2    | protein NDRG3 [OS=Homo sapiens]                                                 | 9.6           | 6            | 1          | 44     | 1                 | 392                     | 61                              | 1                                            | 1                                        | 0                | 1.17.E+07          | 9.56.E+06          | 1.28.E+07          | 1.19.E+07          | 2.50.E+07              | 2.39.E+07              | 2.26.E+07              | 2.68.E+07              |
| 1979 | Q8WWM7-1  | ataxin-2-like protein [OS=Homo sapiens]                                         | 9.6           | 3            | 2          | 14     | 2                 | 38                      | 16                              | 2                                            | 2                                        | 0                | 5.26.E+07          | 4.77.E+07          | 4.87.E+07          | 5.21.E+07          | 6.45.E+07              | 6.98.E+07              | 7.97.E+07              | 7.76.E+07              |
| 1980 | Q9H0E2    | Toll-interacting protein [OS=Homo sapiens]                                      | 9.6           | 5            | 1          | 20     | 1                 | 131                     | 23                              | 1                                            | 1                                        | 0                | 1.14.E+07          | 1.39.E+07          | 1.21.E+07          | 1.14.E+07          | 1.20.E+07              | 1.18.E+07              | 1.19.E+07              | 1.38.E+07              |
| 1981 | Q9H078-2  | Isoform 2 of Caseinolytic peptidase B protein homolog [OS=Homo sapiens]         | 9.6           | 7            | 3          | 24     | 3                 |                         | 23                              | 3                                            | 0                                        | 0                | 9.61.E+07          | 8.85.E+07          | 6.52.E+07          | 5.16.E+07          | 6.33.E+07              | 6.86.E+07              | 1.29.E+07              | 6.70.E+07              |
| 1982 | Q3KQV9    | UDP-N-acetylhexosamine pyrophosphorylase-like protein 1 [OS=Homo sapiens]       | 9.5           | 6            | 2          | 8      | 1                 | 45                      | 6                               | 2                                            | 2                                        | 0                | 1.13.E+06          | 1.45.E+06          | 1.70.E+06          | 1.31.E+06          | 3.26.E+06              | 1.35.E+06              | 3.16.E+06              |                        |
| 1983 | P28799    | Granulins [OS=Homo sapiens]                                                     | 9.5           | 6            | 1          | 4      | 1                 | 45                      | 7                               | 1                                            | 1                                        | 0                |                    |                    |                    |                    | 2.16.E+07              | 2.23.E+07              | 2.81.E+06              | 5.70.E+06              |
| 1984 | Q6P996-1  | Pyridoxal-dependent decarboxylase domain-containing protein 1 [OS=Homo sapiens] | 9.5           | 5            | 2          | 14     | 2                 | 118                     | 10                              | 2                                            | 2                                        | 0                | 1.50.E+07          | 1.84.E+07          | 1.49.E+07          | 1.41.E+07          | 1.81.E+07              | 2.04.E+07              | 9.66.E+06              | 1.73.E+07              |
| 1985 | Q9P2R3    | Rabankyrin-5 [OS=Homo sapiens]                                                  | 9.5           | 2            | 2          | 22     | 2                 | 115                     | 24                              | 2                                            | 2                                        | 0                | 4.02.E+07          | 4.21.E+07          | 4.12.E+07          | 4.07.E+07          | 3.40.E+07              | 3.98.E+07              | 3.69.E+07              | 3.60.E+07              |
| 1986 | Q43159    | ribosomal rna-processing protein 8 [OS=Homo sapiens]                            | 9.5           | 7            | 2          | 9      | 2                 | 27                      | 0                               | 2                                            | 2                                        | 0                | 3.60.E+06          | 1.36.E+07          | 1.37.E+07          | 4.48.E+06          | 2.41.E+06              | 2.54.E+06              | 3.09.E+06              | 2.91.E+06              |
| 1987 | Q969N2    | GPI transamidase component PIG-T [OS=Homo sapiens]                              | 9.5           | 4            | 2          | 16     | 2                 | 44                      | 13                              | 2                                            | 2                                        | 0                | 6.04.E+06          | 1.77.E+07          | 7.13.E+06          | 7.46.E+06          | 2.94.E+07              | 2.39.E+07              | 2.07.E+07              | 2.76.E+07              |
| 1988 | Q14146    | Unhealthy ribosome biogenesis protein 2 homolog [OS=Homo sapiens]               | 9.4           | 2            | 1          | 2      | 1                 | 75                      | 3                               | 1                                            | 1                                        | 0                | 3.42.E+05          |                    |                    |                    |                        |                        |                        |                        |
| 1989 | Q13136    | Liprin-alpha-1 [OS=Homo sapiens]                                                | 9.4           | 2            | 3          | 30     | 1                 | 45                      | 4                               | 3                                            | 1                                        | 1                | 6.67.E+07          | 7.07.E+07          | 6.93.E+07          | 6.30.E+07          | 6.10.E+07              | 6.38.E+07              | 4.94.E+07              | 6.37.E+07              |
| 1990 | Q9H2J4    | phosducin-like protein 3 [OS=Homo sapiens]                                      | 9.4           | 11           | 2          | 18     | 2                 | 65                      | 4                               | 2                                            | 2                                        | 0                | 1.07.E+07          | 1.14.E+07          | 1.21.E+07          | 1.28.E+07          | 1.67.E+07              | 1.19.E+07              | 1.17.E+07              | 1.50.E+07              |
| 1991 | P42892    | Endothelin-converting enzyme 1 [OS=Homo sapiens]                                | 9.4           | 3            | 1          | 2      | 1                 | 31                      | 0                               | 1                                            | 1                                        | 0                | 8.51.E+06          | 1.06.E+07          | 9.17.E+06          | 1.06.E+07          | 1.54.E+07              | 1.26.E+07              | 1.15.E+07              | 1.49.E+07              |
| 1992 | P08579    | U2 small nuclear ribonucleoprotein B'' [OS=Homo sapiens]                        | 9.4           | 12           | 2          | 151    | 1                 | 989                     | 110                             | 2                                            | 2                                        | 0                | 9.96.E+06          | 8.72.E+06          | 9.07.E+06          | 9.46.E+06          | 7.22.E+06              | 7.68.E+06              | 5.72.E+06              | 6.60.E+06              |
| 1993 | O98013-1  | serine/threonine-protein kinase PAK 4 [OS=Homo sapiens]                         | 9.4           | 3            | 1          | 10     | 1                 | 144                     | 5                               | 1                                            | 1                                        | 0                | 1.63.E+06          | 2.12.E+06          | 3.59.E+05          | 2.64.E+06          | 3.32.E+05              | 2.52.E+05              |                        | 1.07.E+06              |
| 1994 | Q9UGP8    | Translocation protein SEC63 homolog [OS=Homo sapiens]                           | 9.4           | 3            | 2          | 12     | 2                 | 52                      | 12                              | 2                                            | 2                                        | 0                | 3.26.E+07          | 2.99.E+07          | 3.19.E+07          | 3.15.E+07          | 4.18.E+07              | 4.35.E+07              | 4.86.E+07              | 2.90.E+07              |
| 1995 | P19404    | NADH dehydrogenase [ubiquinone] flavoprotein 2, mitochondrial [OS=Homo sapiens] | 9.4           | 9            | 2          | 38     | 2                 | 128                     | 24                              | 2                                            | 2                                        | 0                | 5.00.E+07          | 5.17.E+07          | 5.02.E+07          | 4.97.E+07          | 6.35.E+07              | 5.89.E+07              | 5.47.E+07              | 6.48.E+07              |
| 1996 | P05161    | Ubiquitin-like protein ISG15 [OS=Homo sapiens]                                  | 9.4           | 18           | 1          | 2      | 1                 | 33                      | 4                               | 1                                            | 1                                        | 0                | 5.02.E+06          |                    | 4.30.E+06          | 6.81.E+06          | 1.19.E+07              | 1.11.E+07              | 4.31.E+06              | 1.03.E+07              |
| 1997 | Q6PCE3    | glucose 1,6-bisphosphate synthase [OS=Homo sapiens]                             | 9.3           | 8            | 2          | 11     | 2                 | 54                      | 2                               | 1                                            | 2                                        | 0                | 2.06.E+07          | 2.29.E+07          | 2.19.E+07          | 2.57.E+07          | 2.33.E+07              | 3.54.E+07              | 2.56.E+07              | 2.94.E+07              |
| 1998 | P82932    | 28S ribosomal protein S6, mitochondrial [OS=Homo sapiens]                       | 9.3           | 19           | 1          | 10     | 1                 | 149                     | 9                               | 1                                            | 1                                        | 0                | 8.65.E+06          | 6.63.E+06          | 7.02.E+06          | 6.55.E+06          | 3.13.E+06              | 1.63.E+06              | 3.05.E+06              | 3.20.E+06              |
| 1999 | P31751    | RAC-beta serine/threonine-protein kinase [OS=Homo sapiens]                      | 9.3           | 5            | 2          | 8      | 2                 | 69                      | 2                               | 2                                            | 2                                        | 0                | 6.55.E+06          | 1.10.E+07          | 8.78.E+06          | 4.75.E+06          | 5.52.E+06              | 6.37.E+06              | 4.60.E+06              | 3.49.E+06              |
| 2000 | Q9BXV9    | EKC/KEOPS complex subunit GON7 [OS=Homo sapiens]                                | 9.3           | 16           | 1          | 14     | 1                 | 116                     | 18                              | 1                                            | 1                                        | 0                | 1.80.E+07          | 2.23.E+07          |                    | 1.76.E+07          | 2.11.E+07              | 2.56.E+07              | 1.66.E+07              | 2.24.E+07              |
| 2001 | Q16186    | Proteasomal ubiquitin receptor ADRM1 [OS=Homo sapiens]                          | 9.3           | 13           | 3          | 9      | 3                 | 44                      | 3                               | 2                                            | 3                                        | 0                | 2.93.E+07          | 3.15.E+07          | 1.78.E+07          | 3.37.E+07          | 3.04.E+07              | 2.70.E+07              | 2.15.E+07              | 4.12.E+07              |
| 2002 | Q9BU23-1  | Lipase maturation factor 2 [OS=Homo sapiens]                                    | 9.2           | 2            | 1          | 10     | 1                 | 195                     | 12                              | 1                                            | 1                                        | 0                | 4.77.E+06          | 4.77.E+06          | 5.02.E+06          | 5.02.E+06          | 8.76.E+06              | 9.13.E+06              | 6.53.E+06              | 6.96.E+06              |
| 2003 | Q15428    | splicing factor 3a subunit 2 [OS=Homo sapiens]                                  | 9.2           | 4            | 2          | 38     | 2                 | 25                      | 2                               | 2                                            | 2                                        | 0                | 1.53.E+07          | 1.21.E+07          | 1.47.E+07          | 1.31.E+07          | 1.34.E+07              | 1.37.E+07              | 1.25.E+07              | 1.28.E+07              |
| 2004 | Q14790-1  | Caspase-8 [OS=Homo sapiens]                                                     | 9.2           | 4            | 1          | 4      | 1                 | 107                     | 6                               | 1                                            | 1                                        | 0                | 5.37.E+06          | 1.08.E+07          | 7.04.E+06          | 9.95.E+06          | 1.32.E+07              | 1.51.E+07              | 9.54.E+06              | 1.35.E+07              |
| 2005 | O60749    | Sorting nexin-2 [OS=Homo sapiens]                                               | 9.2           | 5            | 2          | 47     | 1                 | 101                     | 66                              | 2                                            | 2                                        | 0                |                    |                    |                    |                    |                        |                        |                        |                        |
| 2006 | Q8NFV4    | Protein Abhd11 [OS=Homo sapiens]                                                | 9.2           | 7            | 1          | 95     | 1                 | 685                     | 49                              | 1                                            | 1                                        | 0                | 1.64.E+07          | 1.71.E+07          | 1.75.E+07          | 1.90.E+07          | 1.40.E+07              | 1.29.E+07              | 1.23.E+07              | 1.33.E+07              |
| 2007 | Q13617-1  | Cullin-2 [OS=Homo sapiens]                                                      | 9.2           | 6            | 4          | 52     | 3                 | 13                      | 22                              | 4                                            | 2                                        | 0                | 9.45.E+06          | 9.32.E+06          | 9.13.E+06          | 1.05.E+07          | 8.16.E+06              | 8.47.E+06              | 5.99.E+06              | 9.08.E+06              |
| 2008 | P13284    | Gamma-interferon-inducible lysosomal thiol reductase [OS=Homo sapiens]          | 9.1           | 15           | 1          | 6      | 1                 | 78                      | 5                               | 1                                            | 1                                        | 0                | 1.06.E+07          | 1.38.E+07          | 1.22.E+07          | 1.23.E+07          |                        | 8.04.E+06              | 7.20.E+05              | 5.57.E+05              |
| 2009 | Q6F181-1  | Anamorsin [OS=Homo sapiens]                                                     | 9.1           | 9            | 2          | 15     | 2                 | 38                      | 17                              | 2                                            | 2                                        | 0                | 2.58.E+07          | 2.62.E+07          | 2.27.E+07          | 2.34.E+07          | 3.25.E+07              | 9.24.E+06              | 3.25.E+07              | 2.83.E+07              |
| 2010 | O14618    | copper chaperone for superoxide dismutase [OS=Homo sapiens]                     | 9.1           | 8            | 2          | 38     | 2                 | 56                      | 26                              | 2                                            | 2                                        | 0                | 3.45.E+08          | 3.78.E+08          | 3.61.E+08          | 3.39.E+08          | 4.95.E+08              | 5.36.E+08              | 5.07.E+08              | 5.24.E+08              |
| 2011 | Q9GZT9-1  | Egl nine homolog 1 [OS=Homo sapiens]                                            | 9.1           | 6            | 1          | 4      | 1                 | 49                      | 6                               | 1                                            | 1                                        | 0                | 1.29.E+07          | 1.05.E+07          | 1.19.E+07          | 1.27.E+07          | 9.06.E+06              | 8.68.E+06              | 1.08.E+07              | 1.02.E+07              |
| 2012 | Q8N806    | Putative E3 ubiquitin-protein ligase UBR7 [OS=Homo sapiens]                     | 9.1           | 8            | 1          | 6      | 1                 | 160                     | 8                               | 1                                            | 1                                        | 0                | 5.03.E+06          |                    | 3.72.E+06          | 4.70.E+06          |                        |                        |                        |                        |
| 2013 | Q969X6    | U3 small nucleolar RNA-associated protein 4 homolog [OS=Homo sapiens]           | 9.1           | 3            | 2          | 14     | 2                 | 77                      | 2                               | 2                                            | 2                                        | 0                | 1.88.E+07          | 2.15.E+07          | 2.98.E+07          | 2.10.E+07          | 1.80.E+07              | 1.92.E+07              | 1.78.E+07              | 1.52.E+07              |
| 2014 | Q9BTC0    | Death-inducer obliterator 1 [OS=Homo sapiens]                                   | 9.1           | 3            | 3          | 41     | 3                 | 103                     | 0                               | 2                                            | 3                                        | 0                | 1.73.E+07          | 1.44.E+07          | 1.45.E+07          | 1.57.E+07          | 1.80.E+07              | 1.77.E+07              | 1.58.E+07              | 1.03.E+07              |
| 2015 | P17568    | NADH dehydrogenase [ubiquinone] 1 beta subcomplex subunit 7 [OS=Homo sapiens]   | 9.1           | 20           | 3          | 49     | 3                 | 78                      | 27                              | 3                                            | 2                                        | 0                | 4.80.E+07          | 5.03.E+07          | 5.27.E+07          | 4.42.E+07          | 5.16.E+07              | 5.14.E+07              | 5.40.E+07              | 5.04.E+07              |
| 2016 | P43007-1  | neutral amino acid transporter A [OS=Homo sapiens]                              | 9.1           | 4            | 1          | 8      | 1                 | 41                      | 16                              | 1                                            | 1                                        | 0                | 8.49.E+06          | 8.69.E+06          | 9.50.E+06          | 8.03.E+06          | 1.06.E+07              | 1.11.E+07              | 1.13.E+07              | 1.25.E+07              |
| 2017 | P08651    | Nuclear factor 1 C-type [OS=Homo sapiens]                                       | 9.0           | 6            | 1          | 2      | 1                 | 33                      | 2                               | 1                                            | 1                                        | 0                | 4.97.E+06          | 6.53.E+05          |                    |                    |                        | 9.38.E+06              | 2.38.E+06              |                        |
| 2018 | Q8TCT8    | Signal peptide peptidase-like 2A [OS=Homo sapiens]                              | 9.0           | 3            | 1          | 62     | 1                 | 322                     | 79                              | 1                                            | 1                                        | 0                | 7.61.E+07          | 7.71.E+07          | 8.18.E+07          | 7.10.E+07          | 8.76.E+07              | 9.86.E+07              | 9.54.E+07              | 9.27.E+07              |
| 2019 | Q8IX12    | Cell division cycle and apoptosis regulator protein 1 [OS=Homo sapiens]         | 9.0           | 3            | 2          | 15     | 2                 | 53                      | 8                               | 2                                            | 2                                        | 0                | 4.14.E+08          | 4.37.E+08          | 3.93.E+08          | 3.89.E+08          | 3.41.E+08              | 3.74.E+08              | 3.35.E+08              | 3.46.E+08              |
| 2020 | O00273-1  | DNA fragmentation factor subunit alpha [OS=Homo sapiens]                        | 9.0           | 8            | 2          | 26     | 2                 | 248                     | 24                              | 2                                            | 2                                        | 0                | 1.56.E+07          | 1.91.E+07          | 1.40.E+07          | 1.67.E+07          | 2.40.E+07              | 2.37.E+07              | 2.20.E+07              | 1.95.E+07              |
| 2021 | Q5J54-1   | Proteasome assembly chaperone 4 [OS=Homo sapiens]                               | 8.9           | 23           | 2          | 10     | 2                 | 54                      | 2                               | 2                                            | 2                                        | 0                | 6.10.E+06          | 5.69.E+06          | 1.04.E+07          | 3.40.E+06          | 3.03.E+06              | 2.87.E+06              | 2.96.E+06              | 3.24.E+06              |
| 2022 | P48729-1  | Casein kinase I isoform alpha [OS=Homo sapiens]                                 | 8.9           | 6            | 2          | 54     | 2                 | 365                     | 14                              | 2                                            | 2                                        | 0                | 2.23.E+07          | 1.95.E+07          | 2.11.E+07          | 2.44.E+07          | 1.71.E+07              | 1.50.E+07              | 1.69.E+07              | 1.47.E+07              |
| 2023 | P49366-1  | deoxyhypusine synthase [OS=Homo sapiens]                                        | 8.9           | 9            | 2          | 20     | 2                 | 90                      | 9                               | 2                                            | 2                                        | 0                | 1.39.E+07          | 1.42.E+07          | 1.22.E+07          | 1.64.E+07          | 1.29.E+07              | 1.35.E+07              | 1.01.E+07              | 1.39.E+07              |
| 2024 | Q92552    | 28S ribosomal protein S27, mitochondrial [OS=Homo sapiens]                      | 8.9           | 5            | 2          | 44     | 2                 | 100                     | 18                              | 2                                            | 2                                        | 0                | 2.53.E+07          | 3.03.E+07          | 2.97.E+07          | 2.68.E+07          | 2.83.E+07              | 2.95.E+07              | 1.46.E+07              | 3.00.E+07              |
| 2025 | Q95347-1  | structural maintenance of chromosomes protein 2 [OS=Homo sapiens]               | 8.9           | 6            | 4          | 6      | 4                 | 0                       | 0                               | 2                                            | 4                                        | 0                | 8.78.E+06          | 6.31.E+06          | 2.79.E+06          | 1.41.E+07          | 3.15.E+07              | 1.89.E+07              | 2.76.E+07              | 2.98.E+07              |
| 2026 | Q9Y676    | 28S ribosomal protein S18b, mitochondrial [OS=Homo sapiens]                     | 8.8           | 13           | 1          | 18     | 1                 | 116                     | 22                              | 1                                            | 1                                        | 0                | 1.10.E+07          | 1.36.E+07          | 4.30.E+06          | 1.23.E+07          | 1.11.E+07              | 1.11.E+07              | 8.70.E+06              | 4.34.E+06              |
| 2027 | O76041-2  | Isoform 2 of Nebulette [OS=Homo sapiens]                                        | 8.8           | 9            | 2          | 19     | 1                 |                         | 8                               | 2                                            | 0                                        | 0                | 1.85.E+07          | 1.46.E+07          | 1.57.E+07          | 1.79.E+07          | 3.20.E+07              | 3.49.E+07              |                        | 3.56.E+07              |

| No.  | Accession | Description                                                                                   | Sum PEP Score | Coverage [%] | # Peptides | # PSMs | # Unique Peptides | Score Mascot: A5 Mascot | Score Sequest HT: A2 Sequest HT | # Peptides (by Search Engine): A2 Sequest HT | # Peptides (by Search Engine): A5 Mascot | # Razor Peptides | ctrl Abundance s_1 | ctrl Abundance s_2 | ctrl Abundance s_3 | ctrl Abundance s_4 | JAM-A KO Abundance s_1 | JAM-A KO Abundance s_2 | JAM-A KO Abundance s_3 | JAM-A KO Abundance s_4 |
|------|-----------|-----------------------------------------------------------------------------------------------|---------------|--------------|------------|--------|-------------------|-------------------------|---------------------------------|----------------------------------------------|------------------------------------------|------------------|--------------------|--------------------|--------------------|--------------------|------------------------|------------------------|------------------------|------------------------|
| 2028 | Q6P1L8    | 39S ribosomal protein L14, mitochondrial [OS=Homo sapiens]                                    | 8.8           | 17           | 2          | 10     | 2                 | 52                      | 2                               | 2                                            | 2                                        | 0                | 2.36.E+07          | 2.30.E+07          | 2.29.E+07          | 2.76.E+07          | 2.09.E+07              | 1.56.E+07              | 2.18.E+07              | 2.24.E+07              |
| 2029 | Q14318    | peptidyl-prolyl cis-trans isomerase FKBP8 [OS=Homo sapiens]                                   | 8.8           | 4            | 1          | 4      | 1                 | 58                      | 6                               | 1                                            | 1                                        | 0                |                    |                    |                    |                    |                        |                        |                        |                        |
| 2030 | Q86TB9    | Protein PAT1 homolog 1 [OS=Homo sapiens]                                                      | 8.8           | 3            | 2          | 4      | 2                 | 34                      | 0                               | 2                                            | 2                                        | 0                | 4.53.E+06          | 5.05.E+06          | 5.94.E+06          | 3.97.E+06          | 7.95.E+06              | 9.33.E+06              | 9.35.E+06              | 8.86.E+06              |
| 2031 | O14908-1  | PDZ domain-containing protein GIPC1 [OS=Homo sapiens]                                         | 8.8           | 14           | 3          | 20     | 3                 | 0                       | 0                               | 2                                            | 3                                        | 0                | 9.99.E+07          | 1.08.E+08          | 8.98.E+07          | 1.16.E+08          | 1.36.E+08              | 1.13.E+08              | 1.06.E+08              | 1.30.E+08              |
| 2032 | Q2TAA2    | Isoamyl acetate-hydrolyzing esterase 1 homolog [OS=Homo sapiens]                              | 8.8           | 11           | 2          | 42     | 2                 | 119                     | 14                              | 2                                            | 2                                        | 0                | 1.01.E+07          | 1.33.E+07          | 8.17.E+06          | 1.30.E+07          | 1.58.E+07              | 1.57.E+07              | 1.59.E+07              | 1.80.E+07              |
| 2033 | Q9NZT2-1  | opioid growth factor receptor [OS=Homo sapiens]                                               | 8.8           | 5            | 2          | 12     | 2                 | 51                      | 5                               | 2                                            | 2                                        | 0                | 1.18.E+07          | 1.39.E+07          | 1.24.E+07          | 1.36.E+07          | 1.14.E+07              | 1.35.E+07              | 1.08.E+07              | 1.15.E+07              |
| 2034 | Q8TC58    | Polyribonucleotide nucleotidyltransferase 1, mitochondrial [OS=Homo sapiens]                  | 8.8           | 4            | 3          | 29     | 3                 | 93                      | 0                               | 3                                            | 3                                        | 0                | 8.16.E+07          | 7.56.E+07          | 8.06.E+07          | 9.31.E+07          | 7.62.E+07              | 7.54.E+07              | 8.57.E+07              | 7.86.E+07              |
| 2035 | Q6ICB0    | Desumoylating isopeptidase 1 [OS=Homo sapiens]                                                | 8.7           | 15           | 1          | 26     | 1                 | 523                     | 38                              | 1                                            | 1                                        | 0                | 1.21.E+07          | 1.24.E+07          | 1.15.E+07          | 1.28.E+07          | 1.05.E+07              | 4.42.E+06              | 8.01.E+06              | 4.76.E+06              |
| 2036 | Q7Z2W9    | 39S ribosomal protein L21, mitochondrial [OS=Homo sapiens]                                    | 8.7           | 14           | 2          | 7      | 2                 | 18                      | 2                               | 2                                            | 2                                        | 0                | 2.75.E+07          | 3.00.E+07          | 2.80.E+07          | 2.93.E+07          | 2.65.E+07              | 2.64.E+07              | 3.05.E+07              | 3.03.E+07              |
| 2037 | O95295    | SNARE-associated protein Snapin [OS=Homo sapiens]                                             | 8.7           | 19           | 1          | 34     | 1                 | 109                     | 16                              | 1                                            | 1                                        | 0                | 1.35.E+07          | 1.67.E+07          | 1.23.E+07          | 1.52.E+07          | 1.12.E+07              | 9.07.E+06              | 7.28.E+06              | 5.03.E+06              |
| 2038 | P17900    | Ganglioside GM2 activator [OS=Homo sapiens]                                                   | 8.7           | 10           | 1          | 12     | 1                 | 225                     | 15                              | 1                                            | 1                                        | 0                | 1.25.E+07          | 1.35.E+07          | 1.06.E+07          | 1.21.E+07          |                        |                        | 9.30.E+06              |                        |
| 2039 | P50750    | Cyclin-dependent kinase 9 [OS=Homo sapiens]                                                   | 8.7           | 6            | 2          | 17     | 1                 | 55                      | 17                              | 2                                            | 2                                        | 0                | 1.32.E+07          | 1.51.E+07          | 5.40.E+06          | 1.37.E+07          | 1.01.E+07              | 1.18.E+07              | 8.37.E+06              | 9.35.E+06              |
| 2040 | P04004    | Vitronectin [OS=Homo sapiens]                                                                 | 8.7           | 3            | 1          | 34     | 1                 | 349                     | 39                              | 1                                            | 1                                        | 0                | 2.29.E+07          | 2.65.E+07          | 2.10.E+07          | 2.48.E+07          | 1.20.E+07              |                        | 9.83.E+06              | 1.10.E+07              |
| 2041 | Q96KG9    | N-terminal kinase-like protein [OS=Homo sapiens]                                              | 8.6           | 5            | 1          | 4      | 1                 | 19                      | 7                               | 1                                            | 1                                        | 0                |                    |                    |                    |                    |                        |                        |                        |                        |
| 2042 | Q96RP9    | Elongation factor G, mitochondrial [OS=Homo sapiens]                                          | 8.6           | 4            | 1          | 6      | 1                 | 58                      | 7                               | 1                                            | 1                                        | 0                | 4.09.E+06          | 1.06.E+07          | 8.66.E+06          | 1.01.E+07          | 1.15.E+07              | 1.20.E+07              | 8.95.E+06              | 1.05.E+07              |
| 2043 | O95466    | formin-like protein 1 [OS=Homo sapiens]                                                       | 8.6           | 2            | 1          | 6      | 1                 | 131                     | 8                               | 1                                            | 1                                        | 0                | 4.22.E+06          | 3.35.E+06          | 3.08.E+06          | 3.48.E+06          | 9.26.E+06              | 8.90.E+06              | 9.23.E+06              | 9.11.E+06              |
| 2044 | Q96CP7    | Calfaclitin [OS=Homo sapiens]                                                                 | 8.6           | 7            | 1          | 16     | 1                 | 126                     | 17                              | 1                                            | 1                                        | 0                | 6.12.E+06          | 7.23.E+06          | 7.13.E+06          | 6.05.E+06          | 1.01.E+07              | 8.51.E+06              | 7.69.E+06              | 7.64.E+06              |
| 2045 | P56211    | cAMP-regulated phosphoprotein 19 [OS=Homo sapiens]                                            | 8.6           | 37           | 2          | 44     | 1                 | 104                     | 31                              | 1                                            | 2                                        | 0                | 2.18.E+07          | 2.53.E+07          | 7.89.E+06          | 1.80.E+07          | 9.97.E+06              | 8.72.E+06              | 3.09.E+07              | 2.96.E+07              |
| 2046 | Q9NTJ5    | Phosphatidylinositol phosphatase SAC1 [OS=Homo sapiens]                                       | 8.6           | 4            | 2          | 14     | 2                 | 59                      | 14                              | 2                                            | 1                                        | 0                | 3.06.E+07          | 3.40.E+07          | 2.90.E+07          | 2.75.E+07          | 2.88.E+07              | 3.40.E+07              | 3.10.E+07              | 3.34.E+07              |
| 2047 | Q9BXK5-1  | Bcl-2-like protein 13 [OS=Homo sapiens]                                                       | 8.5           | 5            | 1          | 26     | 1                 | 83                      | 32                              | 1                                            | 1                                        | 0                | 9.25.E+06          | 8.54.E+06          | 8.11.E+06          | 1.05.E+07          | 1.66.E+07              |                        | 1.46.E+07              |                        |
| 2048 | Q9UHR4    | Brain-specific angiogenesis inhibitor 1-associated protein 2-like protein 1 [OS=Homo sapiens] | 8.5           | 5            | 1          | 30     | 1                 | 130                     | 5                               | 1                                            | 1                                        | 0                | 2.15.E+07          | 1.78.E+07          | 1.74.E+07          | 2.16.E+07          | 2.30.E+07              | 2.02.E+07              | 1.76.E+07              | 2.06.E+07              |
| 2049 | Q9NZM5    | ribosome biogenesis protein NOP53 [OS=Homo sapiens]                                           | 8.5           | 4            | 1          | 28     | 1                 | 380                     | 26                              | 1                                            | 1                                        | 0                | 9.19.E+06          | 9.96.E+06          | 8.86.E+06          | 9.09.E+06          | 1.09.E+07              | 7.64.E+06              | 6.47.E+06              | 6.38.E+06              |
| 2050 | Q9Y6E0    | Serine/threonine-protein kinase 24 [OS=Homo sapiens]                                          | 8.5           | 6            | 2          | 32     | 1                 | 30                      | 6                               | 2                                            | 2                                        | 0                | 4.78.E+06          | 3.30.E+05          | 6.11.E+06          |                    | 8.65.E+06              | 8.61.E+06              | 6.28.E+06              | 1.02.E+07              |
| 2051 | P46736    | Lys-63-specific deubiquitinase BRCC36 [OS=Homo sapiens]                                       | 8.5           | 5            | 1          | 10     | 1                 | 74                      | 3                               | 1                                            | 1                                        | 0                | 9.00.E+06          | 8.61.E+06          | 1.05.E+07          | 9.34.E+06          | 1.18.E+07              | 1.39.E+07              | 1.45.E+07              | 1.52.E+07              |
| 2052 | Q8IZL8    | Proline-, glutamic acid- and leucine-rich protein 1 [OS=Homo sapiens]                         | 8.5           | 2            | 2          | 18     | 2                 | 84                      | 0                               | 2                                            | 2                                        | 0                | 2.18.E+07          | 2.06.E+07          | 2.58.E+07          | 2.09.E+07          | 2.22.E+07              | 2.21.E+07              | 2.25.E+07              | 2.30.E+07              |
| 2053 | P18084    | Integrin beta-5 [OS=Homo sapiens]                                                             | 8.4           | 4            | 2          | 3      | 2                 | 47                      | 3                               | 2                                            | 1                                        | 0                |                    |                    | 3.56.E+07          |                    | 5.09.E+07              | 4.63.E+07              | 6.10.E+07              | 4.95.E+07              |
| 2054 | Q9H2V7    | Protein spinster homolog 1 [OS=Homo sapiens]                                                  | 8.4           | 3            | 1          | 6      | 1                 | 58                      | 5                               | 1                                            | 1                                        | 0                | 2.87.E+06          | 5.09.E+06          | 3.25.E+06          | 4.00.E+06          | 8.16.E+06              | 8.24.E+06              | 6.90.E+06              | 6.78.E+06              |
| 2055 | Q8NB90-1  | Spermatogenesis-associated protein 5 [OS=Homo sapiens]                                        | 8.4           | 3            | 2          | 66     | 1                 | 213                     | 81                              | 2                                            | 2                                        | 0                |                    |                    |                    |                    |                        |                        |                        |                        |
| 2056 | Q99848    | Probable rRNA-processing protein EBP2 [OS=Homo sapiens]                                       | 8.4           | 10           | 2          | 10     | 2                 | 87                      | 11                              | 2                                            | 2                                        | 0                | 4.76.E+07          | 4.47.E+07          | 3.69.E+07          | 5.13.E+07          | 5.43.E+07              | 5.91.E+07              | 5.35.E+07              | 5.03.E+07              |
| 2057 | O60828    | Polyglutamine-binding protein 1 [OS=Homo sapiens]                                             | 8.4           | 12           | 1          | 32     | 1                 | 171                     | 13                              | 1                                            | 1                                        | 0                | 2.17.E+07          | 2.89.E+07          | 2.37.E+07          | 2.82.E+07          | 2.41.E+07              | 2.16.E+07              | 5.23.E+06              | 2.26.E+07              |
| 2058 | P36969    | Phospholipid hydroperoxide glutathione peroxidase, mitochondrial [OS=Homo sapiens]            | 8.4           | 7            | 1          | 24     | 1                 | 272                     | 35                              | 1                                            | 1                                        | 0                | 2.22.E+07          | 2.51.E+07          | 2.21.E+07          |                    | 4.70.E+07              | 4.40.E+07              | 4.76.E+07              | 4.67.E+07              |
| 2059 | Q13425-1  | Beta-2-syntrophin [OS=Homo sapiens]                                                           | 8.3           | 4            | 2          | 34     | 2                 | 525                     | 24                              | 2                                            | 2                                        | 0                | 2.66.E+07          | 2.77.E+07          | 2.50.E+07          | 2.49.E+07          | 2.48.E+07              | 2.27.E+07              | 2.40.E+07              | 2.21.E+07              |
| 2060 | Q9NP61-1  | ADP-ribosylation factor GTPase-activating protein 3 [OS=Homo sapiens]                         | 8.3           | 5            | 2          | 64     | 2                 | 163                     | 0                               | 2                                            | 2                                        | 0                | 2.97.E+07          | 3.27.E+07          | 3.47.E+07          | 3.04.E+07          | 3.25.E+07              | 2.67.E+07              | 3.20.E+07              | 3.19.E+07              |
| 2061 | P49406    | 39S ribosomal protein L19, mitochondrial [OS=Homo sapiens]                                    | 8.3           | 8            | 2          | 37     | 2                 | 210                     | 40                              | 2                                            | 2                                        | 0                | 4.03.E+07          | 4.46.E+07          | 3.98.E+07          | 4.31.E+07          | 3.87.E+07              | 3.51.E+07              | 3.43.E+07              | 2.71.E+07              |
| 2062 | Q00535    | Cyclin-dependent-like kinase 5 [OS=Homo sapiens]                                              | 8.3           | 8            | 3          | 19     | 2                 | 65                      | 7                               | 3                                            | 3                                        | 0                | 7.12.E+06          | 8.88.E+06          | 8.43.E+06          | 8.81.E+06          | 1.39.E+07              | 1.59.E+07              | 3.56.E+06              | 1.61.E+07              |
| 2063 | P62072    | Mitochondrial import inner membrane translocase subunit Tim10 [OS=Homo sapiens]               | 8.3           | 16           | 1          | 14     | 1                 | 149                     | 10                              | 1                                            | 1                                        | 0                | 2.07.E+07          | 1.86.E+07          | 2.02.E+07          | 2.34.E+07          | 1.56.E+07              | 1.69.E+07              | 2.06.E+07              | 1.77.E+07              |
| 2064 | Q9H357    | Tyrosine-protein phosphatase non-receptor type 23 [OS=Homo sapiens]                           | 8.3           | 2            | 2          | 5      | 2                 | 51                      | 7                               | 2                                            | 2                                        | 0                | 2.24.E+06          |                    | 8.16.E+06          | 1.12.E+06          |                        | 7.92.E+06              | 6.55.E+06              | 6.09.E+06              |
| 2065 | Q92685-1  | Dol-P-Man:Man(5)GlcNAc(2)-PP-Dol alpha-1,3-mannosyltransferase [OS=Homo sapiens]              | 8.3           | 2            | 1          | 28     | 1                 | 320                     | 30                              | 1                                            | 1                                        | 0                | 8.77.E+06          | 9.32.E+06          | 8.37.E+06          | 9.51.E+06          | 1.53.E+07              | 1.73.E+07              | 1.27.E+06              | 1.62.E+07              |
| 2066 | Q6NUM9-1  | all-trans-retinol 13,14-reductase [OS=Homo sapiens]                                           | 8.3           | 5            | 2          | 24     | 2                 | 95                      | 18                              | 2                                            | 2                                        | 0                | 1.78.E+07          | 2.19.E+07          | 1.58.E+07          | 1.95.E+07          | 2.73.E+07              | 2.74.E+07              | 2.42.E+07              | 2.62.E+07              |
| 2067 | Q53FV1    | ORM1-like protein 2 [OS=Homo sapiens]                                                         | 8.3           | 10           | 1          | 6      | 1                 | 90                      | 8                               | 1                                            | 1                                        | 0                | 1.92.E+07          | 1.56.E+07          | 1.60.E+07          | 2.00.E+07          | 1.95.E+07              | 1.84.E+07              | 1.40.E+07              | 1.71.E+07              |
| 2068 | Q9H974-1  | Queuine tRNA-ribosyltransferase accessory subunit 2 [OS=Homo sapiens]                         | 8.3           | 4            | 1          | 10     | 1                 | 89                      | 10                              | 1                                            | 1                                        | 0                | 7.28.E+06          | 7.85.E+06          | 6.15.E+06          | 7.57.E+06          | 6.54.E+06              | 6.70.E+06              | 5.29.E+06              | 6.38.E+06              |
| 2069 | Q13421    | mesothelin [OS=Homo sapiens]                                                                  | 8.3           | 6            | 2          | 4      | 2                 | 0                       | 0                               | 2                                            | 1                                        | 0                | 5.99.E+06          | 1.21.E+07          | 1.72.E+07          | 1.24.E+07          | 1.05.E+07              | 3.31.E+07              | 3.30.E+07              | 3.53.E+07              |
| 2070 | Q9BTE3-1  | Mini-chromosome maintenance complex-binding protein [OS=Homo sapiens]                         | 8.3           | 4            | 2          | 19     | 2                 | 51                      | 16                              | 2                                            | 2                                        | 0                | 1.97.E+07          | 1.93.E+07          | 2.06.E+07          | 1.74.E+07          | 2.15.E+07              | 2.26.E+07              | 2.38.E+07              | 2.20.E+07              |
| 2071 | P35658-1  | Nuclear pore complex protein Nup214 [OS=Homo sapiens]                                         | 8.3           | 1            | 1          | 6      | 1                 | 116                     | 7                               | 1                                            | 1                                        | 0                | 8.76.E+06          | 1.04.E+07          | 8.75.E+06          | 5.47.E+06          | 8.63.E+06              | 4.42.E+06              | 6.05.E+06              | 7.51.E+06              |
| 2072 | Q9Y257    | Polymerase delta-interacting protein 2 [OS=Homo sapiens]                                      | 8.2           | 3            | 1          | 8      | 1                 | 142                     | 11                              | 1                                            | 1                                        | 0                | 1.65.E+07          | 1.73.E+07          | 1.79.E+07          | 1.75.E+07          | 2.34.E+07              | 1.76.E+07              | 2.33.E+07              | 1.57.E+07              |
| 2073 | Q14181    | DNA polymerase alpha subunit B [OS=Homo sapiens]                                              | 8.2           | 3            | 1          | 35     | 1                 | 168                     | 21                              | 1                                            | 1                                        | 0                | 2.28.E+07          |                    | 2.28.E+07          |                    |                        |                        | 1.94.E+07              | 1.57.E+07              |
| 2074 | Q9Y5J9    | mitochondrial import inner membrane translocase subunit Tim8 B [OS=Homo sapiens]              | 8.2           | 13           | 1          | 26     | 1                 | 216                     | 24                              | 1                                            | 1                                        | 0                | 8.21.E+06          | 7.90.E+06          | 8.69.E+06          | 9.07.E+06          | 5.54.E+06              | 6.18.E+06              | 6.36.E+06              | 5.72.E+06              |
| 2075 | Q9NYP7-1  | elongation of very long chain fatty acids protein 5 [OS=Homo sapiens]                         | 8.2           | 7            | 2          | 4      | 2                 | 17                      | 2                               | 2                                            | 2                                        | 0                | 1.24.E+07          | 1.24.E+07          | 8.77.E+06          | 1.25.E+07          | 2.14.E+07              | 2.36.E+07              | 2.63.E+07              | 2.22.E+07              |
| 2076 | A8MWD9    | Putative small nuclear ribonucleoprotein G-like protein 15 [OS=Homo sapiens]                  | 8.2           | 26           | 2          | 99     | 2                 | 288                     | 49                              | 2                                            | 2                                        | 0                | 1.10.E+08          | 8.23.E+07          | 1.17.E+08          | 7.27.E+07          | 1.17.E+08              | 1.14.E+08              | 1.02.E+08              | 1.15.E+08              |
| 2077 | O43615    | Mitochondrial import inner membrane translocase subunit TIM44 [OS=Homo sapiens]               | 8.2           | 6            | 2          | 16     | 2                 | 97                      | 9                               | 2                                            | 2                                        | 0                | 1.24.E+07          | 1.85.E+07          | 1.80.E+07          | 1.31.E+07          | 1.52.E+07              | 1.75.E+07              | 3.28.E+06              | 2.67.E+07              |
| 2078 | O00442    | RNA 3'-terminal phosphate cyclase [OS=Homo sapiens]                                           | 8.2           | 5            | 1          | 10     | 1                 | 220                     | 7                               | 1                                            | 1                                        | 0                | 4.81.E+06          | 4.96.E+06          | 4.32.E+06          | 4.72.E+06          | 3.21.E+06              | 1.80.E+06              | 2.51.E+06              | 2.27.E+06              |



| No.  | Accession | Description                                                                                    | Sum PEP Score | Coverage [%] | # Peptides | # PSMs | # Unique Peptides | Score Mascot: A5 Mascot | Score Sequest HT: A2 Sequest HT | # Peptides (by Search Engine): A2 Sequest HT | # Peptides (by Search Engine): A5 Mascot | # Razor Peptides | ctrl Abundance s_1 | ctrl Abundance s_2 | ctrl Abundance s_3 | ctrl Abundance s_4 | JAM-A KO Abundance s_1 | JAM-A KO Abundance s_2 | JAM-A KO Abundance s_3 | JAM-A KO Abundance s_4 |
|------|-----------|------------------------------------------------------------------------------------------------|---------------|--------------|------------|--------|-------------------|-------------------------|---------------------------------|----------------------------------------------|------------------------------------------|------------------|--------------------|--------------------|--------------------|--------------------|------------------------|------------------------|------------------------|------------------------|
| 2079 | Q9Y314    | nitric oxide synthase-interacting protein [OS=Homo sapiens]                                    | 8.2           | 9            | 2          | 44     | 2                 | 103                     | 11                              | 2                                            | 2                                        | 0                | 2.16.E+07          | 2.89.E+07          | 2.98.E+07          | 3.19.E+07          | 2.51.E+07              | 2.76.E+07              | 1.82.E+07              | 2.82.E+07              |
| 2080 | P46934    | E3 ubiquitin-protein ligase NEDD4 [OS=Homo sapiens]                                            | 8.2           | 2            | 2          | 34     | 2                 | 62                      | 15                              | 2                                            | 2                                        | 0                | 1.82.E+07          | 2.05.E+07          | 1.64.E+07          | 2.12.E+07          | 2.05.E+07              | 2.18.E+07              | 1.95.E+07              | 2.27.E+07              |
| 2081 | Q9HD33-1  | 39S ribosomal protein L47, mitochondrial [OS=Homo sapiens]                                     | 8.1           | 5            | 1          | 36     | 1                 | 355                     | 15                              | 1                                            | 1                                        | 0                | 1.12.E+07          | 1.41.E+07          | 1.03.E+07          | 1.39.E+07          | 1.63.E+07              | 1.56.E+07              | 1.11.E+07              | 1.73.E+07              |
| 2082 | Q14527    | Helicase-like transcription factor [OS=Homo sapiens]                                           | 8.1           | 2            | 1          | 2      | 1                 | 50                      | 3                               | 1                                            | 1                                        | 0                |                    |                    |                    |                    |                        |                        |                        |                        |
| 2083 | Q6YN16    | Hydroxysteroid dehydrogenase-like protein 2 [OS=Homo sapiens]                                  | 8.1           | 7            | 2          | 12     | 2                 | 46                      | 14                              | 2                                            | 2                                        | 0                | 3.92.E+07          | 3.62.E+07          | 3.58.E+07          | 3.31.E+07          | 4.79.E+07              | 4.65.E+07              | 4.70.E+07              | 4.50.E+07              |
| 2084 | P02794    | Ferritin heavy chain [OS=Homo sapiens]                                                         | 8.1           | 15           | 3          | 21     | 3                 | 24                      | 0                               | 3                                            | 2                                        | 0                | 4.13.E+07          | 4.14.E+07          | 4.81.E+07          | 4.17.E+07          | 5.16.E+07              | 4.50.E+07              | 4.85.E+07              | 5.34.E+07              |
| 2085 | Q8IY17-4  | Isoform 4 of Neuropathy target esterase [OS=Homo sapiens]                                      | 8.1           | 2            | 1          | 8      | 1                 | 89                      | 0                               | 1                                            | 1                                        | 0                | 4.13.E+06          | 6.25.E+06          | 5.65.E+06          | 7.47.E+06          | 7.60.E+06              | 4.79.E+06              | 3.13.E+06              | 3.89.E+06              |
| 2086 | Q9UIL1-1  | Short coiled-coil protein [OS=Homo sapiens]                                                    | 8.1           | 18           | 1          | 18     | 1                 | 150                     | 9                               | 1                                            | 1                                        | 0                | 4.72.E+06          | 1.04.E+07          | 9.75.E+06          | 4.89.E+06          | 2.14.E+07              | 1.06.E+07              | 9.00.E+06              | 1.08.E+07              |
| 2087 | Q8WUY1    | Protein THEM6 [OS=Homo sapiens]                                                                | 8.0           | 16           | 2          | 16     | 2                 | 49                      | 5                               | 2                                            | 2                                        | 0                | 3.94.E+07          | 4.42.E+07          | 3.96.E+07          | 4.16.E+07          | 3.88.E+07              | 3.82.E+07              | 4.68.E+07              | 3.78.E+07              |
| 2088 | Q86VS8    | Protein Hook homolog 3 [OS=Homo sapiens]                                                       | 8.0           | 2            | 1          | 2      | 1                 | 72                      | 2                               | 1                                            | 1                                        | 0                | 3.54.E+06          | 4.86.E+06          | 4.03.E+06          | 4.44.E+06          | 6.92.E+06              | 6.62.E+06              | 4.71.E+06              | 5.44.E+06              |
| 2089 | Q9C0D5    | Protein TANC1 [OS=Homo sapiens]                                                                | 8.0           | 2            | 1          | 12     | 1                 | 146                     | 0                               | 1                                            | 1                                        | 0                | 8.22.E+06          | 9.83.E+06          | 8.94.E+06          | 8.61.E+06          | 3.40.E+06              | 2.96.E+06              | 3.63.E+06              | 2.37.E+06              |
| 2090 | Q9BW83-1  | Intraflagellar transport protein 27 homolog [OS=Homo sapiens]                                  | 8.0           | 9            | 1          | 4      | 1                 | 63                      | 5                               | 1                                            | 1                                        | 0                | 6.06.E+06          |                    |                    |                    |                        | 2.06.E+07              | 1.29.E+07              | 2.13.E+07              |
| 2091 | Q96H20-1  | Vacuolar-sorting protein SNF8 [OS=Homo sapiens]                                                | 8.0           | 5            | 1          | 2      | 1                 | 55                      | 2                               | 1                                            | 1                                        | 0                | 3.63.E+06          | 6.47.E+06          | 3.10.E+06          | 5.55.E+06          | 1.18.E+07              | 1.45.E+07              | 1.58.E+07              | 1.35.E+07              |
| 2092 | Q86WJ1    | Chromodomain-helicase-DNA-binding protein 1-like OS=Homo sapiens OX=9606 GN=CHD1L PE=1 SV=3    | 8.0           | 2            | 1          | 3      | 1                 | 16                      |                                 |                                              | 1                                        | 0                | 4.88.E+06          |                    | 5.51.E+06          | 4.09.E+06          | 1.15.E+07              | 8.36.E+06              | 1.26.E+07              | 1.03.E+07              |
| 2093 | P09669    | Cytochrome c oxidase subunit 6C [OS=Homo sapiens]                                              | 7.9           | 33           | 3          | 60     | 3                 | 29                      | 7                               | 2                                            | 3                                        | 0                | 9.11.E+07          | 9.28.E+07          | 1.02.E+08          | 8.23.E+07          | 7.46.E+07              | 8.75.E+07              | 7.78.E+07              | 7.78.E+07              |
| 2094 | Q9BWJ5    | Splicing factor 3B subunit 5 [OS=Homo sapiens]                                                 | 7.9           | 28           | 2          | 66     | 2                 | 476                     | 36                              | 2                                            | 2                                        | 0                | 2.65.E+07          | 2.49.E+07          | 2.20.E+07          | 2.53.E+07          | 2.90.E+07              | 2.95.E+07              | 3.05.E+07              | 3.29.E+07              |
| 2095 | Q9UK45    | U6 snRNA-associated Sm-like protein LSM7 [OS=Homo sapiens]                                     | 7.9           | 30           | 2          | 8      | 2                 | 22                      | 5                               | 2                                            | 2                                        | 0                | 3.45.E+07          | 3.63.E+07          | 3.25.E+07          | 3.73.E+07          | 4.52.E+06              | 1.71.E+07              | 1.17.E+07              | 1.40.E+07              |
| 2096 | Q8IWA5    | Choline transporter-like protein 2 [OS=Homo sapiens]                                           | 7.9           | 5            | 2          | 8      | 2                 | 57                      | 6                               | 2                                            | 2                                        | 0                | 4.46.E+07          | 5.29.E+07          | 2.60.E+07          | 4.56.E+07          | 5.01.E+07              | 5.09.E+07              | 4.81.E+07              | 5.27.E+07              |
| 2097 | Q6DD87    | Zinc finger protein 787 [OS=Homo sapiens]                                                      | 7.9           | 7            | 2          | 6      | 2                 | 21                      | 7                               | 2                                            | 0                                        | 6.04.E+06        | 5.21.E+06          | 6.42.E+06          | 6.55.E+06          | 3.23.E+06          | 2.95.E+06              | 3.69.E+06              | 3.45.E+06              |                        |
| 2098 | P16930    | Fumarylacetoacetase [OS=Homo sapiens]                                                          | 7.9           | 9            | 2          | 8      | 2                 | 58                      | 8                               | 1                                            | 2                                        | 0                | 3.87.E+06          | 8.99.E+06          | 4.01.E+06          | 7.89.E+06          | 7.21.E+06              | 6.52.E+06              | 6.77.E+06              | 7.07.E+06              |
| 2099 | Q99549    | M-phase phosphoprotein 8 [OS=Homo sapiens]                                                     | 7.9           | 2            | 1          | 38     | 1                 | 382                     | 11                              | 1                                            | 0                                        | 8.69.E+06        | 5.31.E+06          | 4.86.E+06          | 1.01.E+07          | 1.08.E+07          | 8.84.E+06              | 8.32.E+06              | 9.28.E+06              |                        |
| 2100 | Q9BW91-1  | ADP-ribose pyrophosphatase, mitochondrial [OS=Homo sapiens]                                    | 7.9           | 7            | 1          | 2      | 1                 | 43                      | 3                               | 1                                            | 1                                        | 0                | 4.86.E+06          | 1.01.E+07          | 8.51.E+06          | 9.42.E+06          | 6.52.E+06              | 5.76.E+06              | 5.05.E+06              | 7.84.E+06              |
| 2101 | Q69YN2-1  | CWF19-like protein 1 [OS=Homo sapiens]                                                         | 7.8           | 3            | 1          | 2      | 1                 | 41                      | 2                               | 1                                            | 0                                        | 3.52.E+06        | 3.60.E+06          | 3.83.E+06          | 3.50.E+06          | 3.80.E+06          | 4.53.E+06              | 4.41.E+06              | 4.58.E+06              |                        |
| 2102 | P61009    | Signal peptidase complex subunit 3 [OS=Homo sapiens]                                           | 7.8           | 7            | 1          | 60     | 1                 | 589                     | 78                              | 1                                            | 1                                        | 0                | 5.10.E+07          | 5.70.E+07          | 4.57.E+07          | 5.40.E+07          | 5.06.E+07              | 6.73.E+07              | 5.51.E+07              | 5.44.E+07              |
| 2103 | P18583-5  | Isoform D of Protein SON [OS=Homo sapiens]                                                     | 7.8           | 2            | 2          | 7      | 1                 |                         | 6                               | 2                                            | 0                                        | 5.73.E+06        | 8.38.E+06          | 6.15.E+06          | 7.98.E+06          | 8.15.E+06          | 6.43.E+06              | 5.75.E+06              | 6.74.E+06              |                        |
| 2104 | Q86TG7-1  | Retrotransposon-derived protein PEG10 [OS=Homo sapiens]                                        | 7.8           | 2            | 1          | 14     | 1                 | 84                      | 19                              | 1                                            | 1                                        | 0                | 6.84.E+06          | 6.15.E+06          | 9.50.E+06          | 6.97.E+06          | 1.73.E+07              | 1.92.E+07              | 2.31.E+07              | 1.57.E+07              |
| 2105 | Q12959    | Disks large homolog 1 [OS=Homo sapiens]                                                        | 7.8           | 3            | 2          | 30     | 2                 | 116                     | 6                               | 2                                            | 2                                        | 0                | 1.63.E+07          | 2.00.E+07          | 1.70.E+07          | 2.18.E+07          | 2.56.E+07              | 2.61.E+07              | 2.30.E+07              | 2.35.E+07              |
| 2106 | Q8WYA6    | Beta-catenin-like protein 1 [OS=Homo sapiens]                                                  | 7.8           | 3            | 2          | 30     | 2                 | 274                     | 26                              | 2                                            | 2                                        | 0                | 4.50.E+07          | 4.82.E+07          | 4.34.E+07          | 4.17.E+07          | 3.98.E+07              | 4.33.E+07              | 3.26.E+07              | 4.22.E+07              |
| 2107 | Q9BRJ2    | 39S ribosomal protein L45, mitochondrial [OS=Homo sapiens]                                     | 7.8           | 5            | 1          | 8      | 1                 | 20                      | 5                               | 1                                            | 1                                        | 0                | 3.19.E+07          | 3.54.E+07          | 4.24.E+07          | 3.53.E+07          | 5.41.E+07              | 5.39.E+07              | 3.57.E+07              | 4.04.E+07              |
| 2108 | Q15833-1  | Syntaxin-binding protein 2 [OS=Homo sapiens]                                                   | 7.8           | 6            | 2          | 5      | 2                 | 30                      | 3                               | 2                                            | 2                                        | 0                | 7.95.E+07          | 4.27.E+06          | 5.52.E+06          | 4.30.E+06          | 4.58.E+07              | 3.99.E+06              | 3.80.E+07              | 4.36.E+06              |
| 2109 | Q9BSD7    | Cancer-related nucleoside-triphosphatase [OS=Homo sapiens]                                     | 7.8           | 18           | 2          | 10     | 2                 | 80                      | 9                               | 2                                            | 2                                        | 0                | 1.14.E+07          | 1.11.E+07          | 7.64.E+06          | 1.06.E+07          | 2.24.E+07              | 2.61.E+07              | 2.17.E+07              | 2.29.E+07              |
| 2110 | P56182    | Ribosomal RNA processing protein 1 homolog A [OS=Homo sapiens]                                 | 7.8           | 3            | 1          | 10     | 1                 | 82                      | 12                              | 1                                            | 1                                        | 0                | 2.50.E+07          | 2.59.E+07          | 2.57.E+07          | 2.76.E+07          | 3.14.E+07              | 2.77.E+07              | 3.09.E+07              | 2.77.E+07              |
| 2111 | Q8WUK0    | Phosphatidylglycerophosphatase and protein-tyrosine phosphatase 1 [OS=Homo sapiens]            | 7.8           | 6            | 1          | 8      | 1                 | 87                      | 9                               | 1                                            | 1                                        | 0                | 4.29.E+06          | 8.19.E+06          | 4.54.E+06          | 7.39.E+06          | 9.99.E+06              | 8.52.E+06              | 7.70.E+06              | 7.59.E+06              |
| 2112 | Q92878    | DNA repair protein Rad50 [OS=Homo sapiens]                                                     | 7.8           | 2            | 2          | 4      | 2                 | 43                      | 2                               | 2                                            | 2                                        | 0                |                    | 1.25.E+06          | 2.73.E+06          | 4.50.E+06          | 5.78.E+06              | 6.06.E+06              | 6.51.E+06              | 6.25.E+06              |
| 2113 | P52756    | RNA-binding protein 5 [OS=Homo sapiens]                                                        | 7.7           | 3            | 1          | 10     | 1                 | 148                     | 11                              | 1                                            | 1                                        | 0                | 9.18.E+06          | 8.74.E+06          | 5.13.E+06          | 8.87.E+06          | 6.65.E+06              | 6.74.E+06              | 3.10.E+06              | 3.22.E+06              |
| 2114 | Q9H1B7    | interferon regulatory factor 2-binding protein-like [OS=Homo sapiens]                          | 7.7           | 3            | 1          | 4      | 1                 | 42                      | 5                               | 1                                            | 1                                        | 0                | 1.31.E+06          |                    | 4.17.E+05          | 1.35.E+06          | 4.50.E+06              | 3.14.E+06              | 3.75.E+06              | 4.08.E+06              |
| 2115 | P49757    | Protein numb homolog [OS=Homo sapiens]                                                         | 7.7           | 4            | 1          | 10     | 1                 | 40                      | 14                              | 1                                            | 1                                        | 0                | 3.36.E+07          | 2.09.E+07          | 3.57.E+07          | 1.87.E+07          | 3.64.E+07              | 4.03.E+07              | 2.93.E+07              | 3.45.E+07              |
| 2116 | Q9H2G2-1  | STE20-like serine/threonine-protein kinase [OS=Homo sapiens]                                   | 7.7           | 4            | 3          | 9      | 3                 | 19                      | 5                               | 3                                            | 3                                        | 0                | 3.43.E+07          | 1.88.E+07          | 3.26.E+07          | 3.00.E+07          | 2.32.E+07              | 1.96.E+07              | 2.85.E+07              | 2.81.E+07              |
| 2117 | Q96ST3    | Paired amphipathic helix protein Sin3a [OS=Homo sapiens]                                       | 7.7           | 2            | 2          | 23     | 2                 | 23                      | 2                               | 2                                            | 2                                        | 0                | 1.15.E+08          | 1.18.E+08          | 1.36.E+08          | 1.12.E+08          | 1.14.E+08              | 1.12.E+08              | 1.09.E+08              | 1.06.E+08              |
| 2118 | Q13217    | DnaJ homolog subfamily C member 3 [OS=Homo sapiens]                                            | 7.7           | 6            | 1          | 2      | 1                 | 32                      | 3                               | 1                                            | 1                                        | 0                | 1.40.E+07          | 1.80.E+07          | 1.20.E+07          | 1.39.E+07          | 1.65.E+07              | 1.34.E+07              | 1.25.E+07              | 1.59.E+07              |
| 2119 | Q99595    | Mitochondrial import inner membrane translocase subunit Tim17-A [OS=Homo sapiens]              | 7.7           | 13           | 1          | 2      | 1                 | 34                      | 3                               | 1                                            | 1                                        | 0                |                    |                    |                    |                    |                        |                        |                        |                        |
| 2120 | P57678    | Gem-associated protein 4 [OS=Homo sapiens]                                                     | 7.7           | 2            | 1          | 20     | 1                 | 185                     | 0                               | 1                                            | 1                                        | 0                | 6.77.E+06          | 7.20.E+06          | 6.39.E+06          | 7.54.E+06          | 5.69.E+06              | 4.99.E+06              | 4.83.E+06              | 4.35.E+06              |
| 2121 | Q8N0U8    | Vitamin K epoxide reductase complex subunit 1-like protein 1 [OS=Homo sapiens]                 | 7.7           | 6            | 1          | 104    | 1                 | 1410                    | 116                             | 1                                            | 1                                        | 0                | 2.68.E+07          | 3.11.E+07          | 2.72.E+07          | 2.90.E+07          | 4.88.E+07              | 4.67.E+07              | 2.77.E+07              | 4.78.E+07              |
| 2122 | Q00534    | Cyclin-dependent kinase 6 [OS=Homo sapiens]                                                    | 7.7           | 7            | 2          | 23     | 1                 | 96                      | 12                              | 2                                            | 2                                        | 0                | 5.02.E+06          | 6.76.E+06          | 4.45.E+06          | 6.55.E+06          | 7.21.E+06              | 7.52.E+06              | 6.02.E+06              | 7.70.E+06              |
| 2123 | Q9H3P2-1  | Negative elongation factor A [OS=Homo sapiens]                                                 | 7.6           | 2            | 1          | 8      | 1                 | 116                     | 8                               | 1                                            | 1                                        | 0                | 6.14.E+06          | 5.57.E+06          | 6.54.E+06          | 4.56.E+06          | 9.28.E+06              | 9.66.E+06              | 8.51.E+06              | 9.06.E+06              |
| 2124 | Q9NRY5    | Protein FAM114A2 [OS=Homo sapiens]                                                             | 7.6           | 4            | 1          | 6      | 1                 | 29                      | 4                               | 1                                            | 1                                        | 0                | 6.42.E+06          | 7.14.E+06          | 6.49.E+06          | 7.73.E+06          | 6.55.E+06              | 5.13.E+06              | 7.01.E+06              | 6.20.E+06              |
| 2125 | Q9NVH1-1  | DnaJ homolog subfamily C member 11 [OS=Homo sapiens]                                           | 7.6           | 4            | 1          | 4      | 1                 | 26                      | 4                               | 1                                            | 1                                        | 0                | 7.27.E+06          | 7.51.E+06          | 5.78.E+06          |                    | 1.03.E+07              | 9.62.E+06              | 2.19.E+06              | 8.93.E+06              |
| 2126 | P49903-1  | Selenide, water dikinase 1 [OS=Homo sapiens]                                                   | 7.6           | 8            | 2          | 36     | 2                 | 123                     | 38                              | 2                                            | 2                                        | 0                | 1.89.E+07          | 5.80.E+07          | 1.66.E+07          | 1.56.E+07          | 1.99.E+07              | 8.40.E+07              | 3.92.E+06              | 1.93.E+07              |
| 2127 | Q7Z222    | Elongation factor-like GTPase 1 [OS=Homo sapiens]                                              | 7.6           | 3            | 3          | 8      | 3                 | 26                      | 2                               | 3                                            | 3                                        | 0                | 4.02.E+07          | 4.21.E+07          | 4.83.E+07          | 3.92.E+07          | 3.67.E+07              | 4.16.E+07              | 4.34.E+07              | 3.90.E+07              |
| 2128 | Q8TCJ2    | Dolichyl-diphosphooligosaccharide--protein glycosyltransferase subunit STT3B [OS=Homo sapiens] | 7.6           | 2            | 2          | 30     | 2                 | 202                     | 25                              | 2                                            | 2                                        | 0                | 5.43.E+07          | 6.06.E+07          | 5.61.E+07          | 5.19.E+07          | 8.08.E+07              | 8.84.E+07              | 8.59.E+07              | 7.87.E+07              |
| 2129 | Q9BVI4    | Nucleolar complex protein 4 homolog [OS=Homo sapiens]                                          | 7.6           | 5            | 1          | 16     | 1                 | 85                      | 17                              | 1                                            | 1                                        | 0                |                    |                    |                    |                    |                        |                        |                        |                        |
| 2130 | Q9NPA8-1  | Transcription and mRNA export factor ENY2 [OS=Homo sapiens]                                    | 7.5           | 17           | 1          | 12     | 1                 | 39                      | 18                              | 1                                            | 1                                        | 0                | 2.52.E+07          | 2.68.E+07          | 1.21.E+07          | 2.68.E+07          | 2.92.E+07              | 3.68.E+07              | 2.43.E+07              | 3.81.E+07              |
| 2131 | Q9NRV9    | Heme-binding protein 1 [OS=Homo sapiens]                                                       | 7.5           | 8            | 1          | 8      | 1                 | 39                      | 10                              | 1                                            | 1                                        | 0                | 1.17.E+07          | 1.27.E+07          | 1.36.E+07          | 1.17.E+07          | 1.63.E+07              | 1.56.E+07              | 1.97.E+07              | 1.71.E+07              |

| No.  | Accession | Description                                                                     | Sum PEP Score | Coverage [%] | # Peptides | # PSMs | # Unique Peptides | Score Mascot: A5 Mascot | Score Sequest HT: A2 Sequest HT | # Peptides (by Search Engine): A2 Sequest HT | # Peptides (by Search Engine): A5 Mascot | # Razor Peptides | ctrl Abundance s_1 | ctrl Abundance s_2 | ctrl Abundance s_3 | ctrl Abundance s_4 | JAM-A KO Abundance s_1 | JAM-A KO Abundance s_2 | JAM-A KO Abundance s_3 | JAM-A KO Abundance s_4 |
|------|-----------|---------------------------------------------------------------------------------|---------------|--------------|------------|--------|-------------------|-------------------------|---------------------------------|----------------------------------------------|------------------------------------------|------------------|--------------------|--------------------|--------------------|--------------------|------------------------|------------------------|------------------------|------------------------|
| 2132 | Q13427    | peptidyl-prolyl cis-trans isomerase g [OS=Homo sapiens]                         | 7.5           | 2            | 1          | 4      | 1                 | 64                      | 5                               | 1                                            | 1                                        | 0                | 4.31.E+07          | 3.68.E+07          | 4.37.E+07          | 4.13.E+07          | 3.50.E+07              | 4.41.E+07              | 2.27.E+07              | 3.77.E+07              |
| 2133 | Q99797    | Mitochondrial intermediate peptidase [OS=Homo sapiens]                          | 7.5           | 5            | 2          | 6      | 2                 | 35                      | 0                               | 1                                            | 2                                        | 0                | 2.20.E+06          | 2.43.E+06          | 2.85.E+06          | 2.55.E+06          | 2.46.E+06              | 2.27.E+06              | 2.59.E+06              | 3.13.E+06              |
| 2134 | Q9Y580    | RNA-binding protein 7 [OS=Homo sapiens]                                         | 7.5           | 7            | 1          | 4      | 1                 | 70                      | 5                               | 1                                            | 1                                        | 0                | 8.90.E+06          | 8.90.E+06          | 8.53.E+06          | 8.53.E+06          | 1.09.E+07              | 9.10.E+06              | 9.64.E+06              | 1.03.E+07              |
| 2135 | Q8WZ82    | Esterase OXCA2 [OS=Homo sapiens]                                                | 7.5           | 6            | 1          | 22     | 1                 | 380                     | 16                              | 1                                            | 1                                        | 0                | 1.01.E+07          | 1.02.E+07          | 9.71.E+06          | 1.08.E+07          | 7.73.E+06              | 8.23.E+06              | 8.35.E+06              | 8.76.E+06              |
| 2136 | Q9P0J0    | NADH dehydrogenase [ubiquinone] 1 alpha subcomplex subunit 13 [OS=Homo sapiens] | 7.4           | 19           | 2          | 8      | 2                 | 86                      | 6                               | 2                                            | 2                                        | 0                | 7.97.E+07          | 8.36.E+07          | 7.59.E+07          | 8.00.E+07          | 7.12.E+07              | 7.19.E+07              | 4.19.E+07              | 6.99.E+07              |
| 2137 | Q92665    | 28S ribosomal protein S31, mitochondrial [OS=Homo sapiens]                      | 7.4           | 6            | 1          | 17     | 1                 | 105                     | 5                               | 1                                            | 1                                        | 0                | 4.41.E+06          | 3.56.E+06          | 3.67.E+06          | 2.83.E+06          | 5.10.E+06              | 4.04.E+06              | 4.50.E+06              | 5.50.E+06              |
| 2138 | P13807    | glycogen [starch] synthase, muscle [OS=Homo sapiens]                            | 7.4           | 3            | 1          | 10     | 1                 | 0                       | 7                               | 1                                            | 1                                        | 0                |                    | 4.46.E+07          | 4.86.E+07          | 3.60.E+07          | 2.50.E+07              | 8.02.E+06              | 1.76.E+07              | 2.77.E+07              |
| 2139 | Q0VDG4-1  | secernin-3 [OS=Homo sapiens]                                                    | 7.4           | 7            | 1          | 2      | 1                 | 0                       | 0                               | 1                                            | 1                                        | 0                | 3.16.E+06          | 3.76.E+06          | 2.26.E+06          | 4.05.E+06          | 5.34.E+06              | 3.34.E+06              | 2.56.E+06              | 4.35.E+06              |
| 2140 | Q7Z2T5-1  | TRMT1-like protein [OS=Homo sapiens]                                            | 7.3           | 2            | 1          | 2      | 1                 | 51                      | 2                               | 1                                            | 1                                        | 0                |                    |                    |                    |                    |                        |                        |                        |                        |
| 2141 | Q9UH65    | Switch-associated protein 70 [OS=Homo sapiens]                                  | 7.3           | 3            | 2          | 8      | 2                 | 46                      | 5                               | 2                                            | 2                                        | 0                | 2.62.E+07          | 2.26.E+07          | 3.51.E+07          | 1.88.E+07          |                        | 1.90.E+07              |                        |                        |
| 2142 | Q9NZD2    | Glycolipid transfer protein OS=Homo sapiens OX=9606 GN=GLTP PE=1 SV=3           | 7.3           | 7            | 1          | 2      | 1                 | 33                      |                                 |                                              | 1                                        | 0                | 1.11.E+07          | 1.13.E+07          | 1.13.E+07          | 1.14.E+07          | 1.54.E+07              | 1.48.E+07              | 5.91.E+06              | 1.39.E+07              |
| 2143 | Q9H9C1-1  | Spermatogenesis-defective protein 39 homolog [OS=Homo sapiens]                  | 7.3           | 5            | 1          | 14     | 1                 | 97                      | 2                               | 1                                            | 1                                        | 0                | 7.33.E+06          | 7.84.E+06          | 6.20.E+06          | 5.84.E+06          | 3.37.E+06              | 3.53.E+06              | 2.16.E+06              | 3.67.E+06              |
| 2144 | O15270    | Serine palmitoyltransferase 2 [OS=Homo sapiens]                                 | 7.3           | 4            | 1          | 44     | 1                 | 631                     | 24                              | 1                                            | 1                                        | 0                | 2.14.E+07          | 1.31.E+07          |                    | 1.70.E+07          | 3.55.E+07              | 2.91.E+07              |                        | 1.10.E+07              |
| 2145 | P36639    | 7,8-dihydro-8-oxoguanine triphosphatase [OS=Homo sapiens]                       | 7.2           | 7            | 1          | 18     | 1                 | 161                     | 27                              | 1                                            | 1                                        | 0                | 2.22.E+07          | 2.00.E+07          | 3.23.E+07          | 2.80.E+07          | 3.16.E+07              | 4.08.E+07              | 3.51.E+07              | 2.82.E+07              |
| 2146 | Q9H0W8    | protein SMG9 [OS=Homo sapiens]                                                  | 7.2           | 8            | 2          | 8      | 2                 | 77                      | 6                               | 2                                            | 2                                        | 0                | 8.03.E+06          | 1.04.E+07          | 9.32.E+06          | 8.95.E+06          | 9.01.E+06              | 1.10.E+07              | 9.28.E+06              | 7.84.E+06              |
| 2147 | Q9NY93    | Probable ATP-dependent RNA helicase DDX56 [OS=Homo sapiens]                     | 7.2           | 3            | 1          | 6      | 1                 | 29                      | 8                               | 1                                            | 1                                        | 0                | 1.34.E+07          | 1.09.E+07          | 1.42.E+07          | 1.44.E+07          | 1.30.E+07              | 1.22.E+07              | 1.18.E+07              | 6.00.E+06              |
| 2148 | Q9BTZ2    | dehydrogenase/reductase sdr family member 4 [OS=Homo sapiens]                   | 7.2           | 6            | 2          | 27     | 2                 | 226                     | 28                              | 2                                            | 2                                        | 0                | 3.65.E+07          | 3.28.E+07          | 3.59.E+07          | 3.37.E+07          | 3.01.E+07              | 2.61.E+07              | 2.81.E+07              | 2.79.E+07              |
| 2149 | Q96CU9    | FAD-dependent oxidoreductase domain-containing protein 1 [OS=Homo sapiens]      | 7.2           | 6            | 2          | 16     | 2                 | 114                     | 15                              | 2                                            | 2                                        | 0                | 5.37.E+06          | 6.36.E+06          | 5.34.E+06          | 7.83.E+06          | 1.00.E+07              | 8.86.E+06              | 8.62.E+06              | 9.95.E+06              |
| 2150 | Q9JMY4-1  | Sorting nexin-12 [OS=Homo sapiens]                                              | 7.2           | 8            | 2          | 78     | 1                 | 47                      | 18                              | 2                                            | 2                                        | 0                | 8.59.E+06          |                    | 9.20.E+06          | 1.14.E+07          | 1.23.E+07              | 1.12.E+07              | 1.30.E+07              | 1.29.E+07              |
| 2151 | P22307-1  | Non-specific lipid-transfer protein [OS=Homo sapiens]                           | 7.2           | 3            | 2          | 39     | 2                 | 106                     | 12                              | 2                                            | 2                                        | 0                | 7.36.E+07          | 7.43.E+07          | 7.95.E+07          | 6.50.E+07          | 8.40.E+07              | 8.93.E+07              | 9.23.E+07              | 8.21.E+07              |
| 2152 | Q96QC0    | Serine/threonine-protein phosphatase 1 regulatory subunit 10 [OS=Homo sapiens]  | 7.2           | 4            | 2          | 30     | 2                 | 74                      | 6                               | 2                                            | 2                                        | 0                | 1.40.E+07          | 1.48.E+07          | 7.91.E+06          | 1.44.E+07          | 1.31.E+07              | 1.37.E+07              | 1.08.E+07              | 1.25.E+07              |
| 2153 | Q8WU90    | Zinc finger CCCH domain-containing protein 15 [OS=Homo sapiens]                 | 7.2           | 4            | 2          | 16     | 2                 | 30                      | 2                               | 2                                            | 2                                        | 0                | 3.24.E+07          | 3.65.E+07          | 3.25.E+07          | 3.10.E+07          | 5.10.E+07              | 4.63.E+07              | 3.95.E+07              | 4.85.E+07              |
| 2154 | O94776    | Metastasis-associated protein MTA2 [OS=Homo sapiens]                            | 7.2           | 3            | 1          | 4      | 1                 | 75                      | 6                               | 1                                            | 1                                        | 0                | 1.98.E+07          |                    |                    |                    | 1.39.E+07              | 1.23.E+07              | 5.50.E+06              | 1.44.E+07              |
| 2155 | Q9NQG5    | regulation of nuclear pre-mRNA domain-containing protein 1B [OS=Homo sapiens]   | 7.2           | 13           | 2          | 10     | 2                 | 66                      | 2                               | 2                                            | 2                                        | 0                | 1.03.E+07          | 1.39.E+07          | 1.39.E+07          |                    | 1.69.E+07              | 1.19.E+07              | 3.75.E+06              | 5.28.E+06              |
| 2156 | Q6NXG1-1  | epithelial splicing regulatory protein 1 [OS=Homo sapiens]                      | 7.2           | 5            | 2          | 45     | 2                 | 111                     | 4                               | 2                                            | 1                                        | 0                | 1.25.E+08          | 1.24.E+08          | 1.35.E+08          | 1.10.E+08          | 1.15.E+08              | 1.15.E+08              | 1.23.E+08              | 1.23.E+08              |
| 2157 | P57105    | Synaptotagmin-2-binding protein [OS=Homo sapiens]                               | 7.2           | 8            | 1          | 26     | 1                 | 342                     | 27                              | 1                                            | 1                                        | 0                | 2.38.E+07          | 2.51.E+07          | 2.42.E+07          | 2.40.E+07          | 3.65.E+07              | 3.68.E+07              | 3.59.E+07              | 3.99.E+07              |
| 2158 | Q81VT5-1  | kinase suppressor of Ras 1 [OS=Homo sapiens]                                    | 7.2           | 4            | 2          | 4      | 2                 | 29                      | 4                               | 2                                            | 2                                        | 0                | 2.05.E+06          | 1.34.E+06          | 1.55.E+06          | 1.22.E+06          | 1.19.E+07              | 4.38.E+06              | 3.68.E+06              | 1.07.E+07              |
| 2159 | O94874-1  | E3 UFM1-protein ligase 1 [OS=Homo sapiens]                                      | 7.1           | 3            | 1          | 20     | 1                 | 150                     | 2                               | 1                                            | 1                                        | 0                |                    |                    |                    |                    |                        |                        |                        |                        |
| 2160 | Q9NX63    | MICOS complex subunit MIC19 [OS=Homo sapiens]                                   | 7.1           | 5            | 1          | 16     | 1                 | 80                      | 17                              | 1                                            | 1                                        | 0                | 1.08.E+07          | 1.03.E+07          | 1.15.E+07          | 1.42.E+07          | 1.58.E+07              | 1.61.E+07              | 1.46.E+07              | 1.56.E+07              |
| 2161 | Q9UQE7    | Structural maintenance of chromosomes protein 3 [OS=Homo sapiens]               | 7.1           | 2            | 2          | 6      | 2                 | 37                      | 4                               | 2                                            | 2                                        | 0                | 2.22.E+07          | 2.22.E+07          | 2.39.E+07          | 2.32.E+07          | 2.90.E+07              | 2.72.E+07              | 3.15.E+07              | 2.63.E+07              |
| 2162 | Q9UHB6    | LIM domain and actin-binding protein 1 [OS=Homo sapiens]                        | 7.1           | 2            | 1          | 4      | 1                 | 58                      | 2                               | 1                                            | 1                                        | 0                | 1.72.E+07          | 1.69.E+07          | 1.44.E+07          | 1.50.E+07          | 1.43.E+07              | 1.42.E+07              | 1.62.E+07              | 1.56.E+07              |
| 2163 | Q15269    | Periodic tryptophan protein 2 homolog [OS=Homo sapiens]                         | 7.1           | 3            | 2          | 23     | 2                 | 44                      | 25                              | 2                                            | 2                                        | 0                | 2.52.E+07          | 3.13.E+07          | 2.48.E+07          | 2.13.E+07          | 4.12.E+07              | 3.43.E+07              | 2.41.E+07              | 3.66.E+07              |
| 2164 | Q9H2U1    | ATP-dependent RNA helicase DHX36 [OS=Homo sapiens]                              | 7.1           | 3            | 2          | 16     | 2                 | 35                      | 4                               | 2                                            | 2                                        | 0                | 3.23.E+06          | 3.46.E+06          | 3.21.E+06          | 2.83.E+06          | 2.92.E+06              | 3.37.E+06              | 2.91.E+06              | 3.59.E+06              |
| 2165 | Q14671-1  | Pumilio homolog 1 [OS=Homo sapiens]                                             | 7.1           | 3            | 3          | 7      | 3                 | 17                      | 4                               | 3                                            | 2                                        | 0                | 8.93.E+06          | 8.63.E+06          | 1.01.E+07          | 1.10.E+07          | 9.23.E+06              | 8.95.E+06              | 1.03.E+07              | 9.30.E+06              |
| 2166 | Q96JP5-1  | E3 ubiquitin-protein ligase ZFP91 [OS=Homo sapiens]                             | 7.1           | 4            | 1          | 4      | 1                 | 28                      | 6                               | 1                                            | 1                                        | 0                |                    |                    |                    |                    |                        |                        |                        |                        |
| 2167 | P22570    | NADPH:adrenodoxin oxidoreductase, mitochondrial [OS=Homo sapiens]               | 7.1           | 4            | 1          | 46     | 1                 | 115                     | 32                              | 1                                            | 1                                        | 0                | 1.18.E+07          | 1.42.E+07          | 1.21.E+07          | 1.28.E+07          | 1.47.E+07              | 1.45.E+07              | 1.15.E+07              | 1.38.E+07              |
| 2168 | Q5T310    | G patch domain-containing protein 4 [OS=Homo sapiens]                           | 7.1           | 4            | 1          | 4      | 1                 | 70                      | 6                               | 1                                            | 1                                        | 0                |                    |                    |                    |                    |                        |                        |                        |                        |
| 2169 | Q9NT62    | ubiquitin-like-conjugating enzyme ATG3 [OS=Homo sapiens]                        | 7.1           | 9            | 2          | 30     | 2                 | 20                      | 25                              | 2                                            | 0                                        | 3.64.E+07        | 4.52.E+07          | 4.42.E+07          | 3.88.E+07          | 5.56.E+07          | 5.81.E+07              | 5.56.E+07              | 4.93.E+07              |                        |
| 2170 | Q9Y3E7    | Charged multivesicular body protein 3 [OS=Homo sapiens]                         | 7.0           | 5            | 1          | 2      | 1                 | 32                      | 3                               | 1                                            | 1                                        | 0                | 1.62.E+07          | 1.54.E+07          | 1.81.E+07          | 1.72.E+07          | 1.89.E+07              | 2.01.E+07              | 1.95.E+07              | 2.01.E+07              |
| 2171 | Q96HR9    | Receptor expression-enhancing protein 6 [OS=Homo sapiens]                       | 7.0           | 6            | 1          | 34     | 1                 | 406                     | 16                              | 1                                            | 1                                        | 0                | 8.53.E+06          | 9.39.E+06          | 7.64.E+06          | 7.91.E+06          | 1.14.E+07              | 1.05.E+07              | 8.51.E+06              | 9.11.E+06              |
| 2172 | Q9Y3C4    | EKC/KEOPS complex subunit TPRKB [OS=Homo sapiens]                               | 7.0           | 14           | 2          | 28     | 2                 | 175                     | 4                               | 2                                            | 2                                        | 0                | 2.19.E+07          | 2.52.E+07          | 2.29.E+07          | 1.96.E+07          | 2.32.E+07              | 2.24.E+07              | 2.27.E+07              | 2.39.E+07              |
| 2173 | Q9NRR7-2  | Isoform 2 of Epimerase family protein SDR39U1 [OS=Homo sapiens]                 | 7.0           | 13           | 2          | 8      | 2                 |                         | 0                               | 2                                            |                                          | 0                | 1.50.E+06          | 1.41.E+06          | 1.65.E+06          | 1.28.E+06          | 1.74.E+06              | 1.56.E+06              | 1.79.E+06              | 1.90.E+06              |
| 2174 | Q5W0V3    | Protein FAM160B1 [OS=Homo sapiens]                                              | 7.0           | 4            | 1          | 8      | 1                 | 43                      | 12                              | 1                                            | 1                                        | 0                | 8.80.E+06          | 8.44.E+06          | 1.07.E+07          | 9.00.E+06          |                        | 4.64.E+06              | 4.98.E+06              | 5.73.E+06              |
| 2175 | P20645    | Cation-dependent mannose-6-phosphate receptor [OS=Homo sapiens]                 | 7.0           | 5            | 1          | 4      | 1                 | 41                      | 5                               | 1                                            | 1                                        | 0                |                    |                    |                    |                    |                        |                        |                        |                        |
| 2176 | P82650    | 28S ribosomal protein S22, mitochondrial [OS=Homo sapiens]                      | 6.9           | 13           | 2          | 9      | 2                 | 20                      | 0                               | 2                                            | 2                                        | 0                | 2.12.E+07          | 2.79.E+07          | 3.33.E+07          | 2.19.E+07          | 4.53.E+07              | 3.76.E+07              | 2.83.E+07              | 4.66.E+07              |
| 2177 | Q96QD8    | sodium-coupled neutral amino acid transporter 2 [OS=Homo sapiens]               | 6.9           | 4            | 1          | 8      | 1                 | 81                      | 12                              | 1                                            | 1                                        | 0                | 1.21.E+07          | 1.19.E+07          | 1.40.E+07          | 1.37.E+07          | 8.50.E+06              |                        | 5.33.E+06              | 7.76.E+06              |
| 2178 | Q96AY3    | Peptidyl-prolyl cis-trans isomerase FKBP10 [OS=Homo sapiens]                    | 6.8           | 6            | 2          | 22     | 2                 | 140                     | 14                              | 2                                            | 2                                        | 0                | 8.63.E+06          | 7.69.E+06          | 5.97.E+06          | 1.16.E+07          | 2.98.E+07              | 1.92.E+07              | 1.61.E+07              | 2.67.E+07              |
| 2179 | O75718    | Cartilage-associated protein [OS=Homo sapiens]                                  | 6.8           | 5            | 2          | 10     | 2                 | 34                      | 2                               | 2                                            | 2                                        | 0                | 6.64.E+06          | 7.80.E+06          | 4.62.E+06          | 8.03.E+06          | 1.28.E+07              | 1.36.E+07              | 9.60.E+06              | 1.57.E+07              |
| 2180 | Q06265-1  | Exosome complex component RRP45 [OS=Homo sapiens]                               | 6.8           | 3            | 1          | 6      | 1                 | 71                      | 8                               | 1                                            | 1                                        | 0                | 1.82.E+07          | 2.10.E+07          | 2.29.E+07          | 2.23.E+07          | 2.43.E+07              | 2.40.E+07              | 2.58.E+07              | 3.04.E+07              |
| 2181 | Q9UI09    | NADH dehydrogenase [ubiquinone] 1 alpha subcomplex subunit 12 [OS=Homo sapiens] | 6.8           | 8            | 1          | 6      | 1                 | 33                      | 8                               | 1                                            | 1                                        | 0                | 2.97.E+07          | 2.72.E+07          | 2.99.E+07          | 3.15.E+07          | 1.46.E+07              | 1.36.E+07              | 1.62.E+07              | 1.47.E+07              |

| No.  | Accession | Description                                                                            | Sum PEP Score | Coverage [%] | # Peptides | # PSMs | # Unique Peptides | Score Mascot: A5 Mascot | Score Sequest HT: A2 Sequest HT | # Peptides (by Search Engine): A2 Sequest HT | # Peptides (by Search Engine): A5 Mascot | # Razor Peptides | ctrl Abundance s_1 | ctrl Abundance s_2 | ctrl Abundance s_3 | ctrl Abundance s_4 | JAM-A KO Abundance s_1 | JAM-A KO Abundance s_2 | JAM-A KO Abundance s_3 | JAM-A KO Abundance s_4 |
|------|-----------|----------------------------------------------------------------------------------------|---------------|--------------|------------|--------|-------------------|-------------------------|---------------------------------|----------------------------------------------|------------------------------------------|------------------|--------------------|--------------------|--------------------|--------------------|------------------------|------------------------|------------------------|------------------------|
| 2182 | P07311    | Acylphosphatase-1 [OS=Homo sapiens]                                                    | 6.7           | 22           | 2          | 14     | 2                 | 30                      | 10                              | 2                                            | 2                                        | 0                | 3.49.E+07          | 3.22.E+07          | 3.83.E+07          | 4.49.E+07          | 4.03.E+07              | 3.65.E+07              | 4.35.E+07              | 4.02.E+07              |
| 2183 | Q9Y5P6    | Mannose-1-phosphate guanylyltransferase beta [OS=Homo sapiens]                         | 6.7           | 7            | 2          | 31     | 2                 | 0                       | 2                               | 2                                            | 2                                        | 0                | 2.14.E+07          | 2.06.E+07          | 2.14.E+07          | 2.14.E+07          | 2.35.E+07              | 1.90.E+07              | 4.36.E+06              | 2.13.E+07              |
| 2184 | Q9Y5U8    | Mitochondrial pyruvate carrier 1 [OS=Homo sapiens]                                     | 6.7           | 19           | 1          | 4      | 1                 | 86                      | 5                               | 1                                            | 1                                        | 0                | 4.40.E+06          | 5.13.E+06          | 4.16.E+06          | 5.40.E+06          | 2.57.E+06              | 3.49.E+06              | 2.38.E+06              | 3.04.E+06              |
| 2185 | O00233-1  | 26S proteasome non-ATPase regulatory subunit 9 [OS=Homo sapiens]                       | 6.7           | 9            | 2          | 15     | 2                 | 18                      | 12                              | 2                                            | 2                                        | 0                | 2.95.E+07          | 3.10.E+07          | 2.89.E+07          | 9.87.E+06          | 3.50.E+07              | 4.01.E+07              | 2.93.E+07              | 8.78.E+06              |
| 2186 | P11233    | Ras-related protein Ral-A [OS=Homo sapiens]                                            | 6.7           | 6            | 1          | 20     | 1                 | 250                     | 4                               | 1                                            | 1                                        | 0                | 1.61.E+07          | 1.43.E+07          | 1.47.E+07          | 1.40.E+07          | 7.30.E+06              | 7.86.E+06              | 4.66.E+06              | 8.04.E+06              |
| 2187 | Q8NI22    | Multiple coagulation factor deficiency protein 2 [OS=Homo sapiens]                     | 6.7           | 12           | 1          | 12     | 1                 | 118                     | 16                              | 1                                            | 1                                        | 0                | 1.14.E+07          | 1.53.E+07          | 1.28.E+07          | 1.32.E+07          | 2.60.E+07              | 2.53.E+07              | 2.60.E+07              | 2.77.E+07              |
| 2188 | Q96DV4    | 39S ribosomal protein L38, mitochondrial [OS=Homo sapiens]                             | 6.7           | 8            | 2          | 68     | 2                 | 306                     | 19                              | 2                                            | 2                                        | 0                | 3.93.E+07          | 4.07.E+07          | 3.72.E+07          | 4.05.E+07          | 4.12.E+07              | 3.84.E+07              | 3.08.E+07              | 3.74.E+07              |
| 2189 | O75145-1  | Liprin-alpha-3 [OS=Homo sapiens]                                                       | 6.7           | 3            | 2          | 15     | 1                 | 45                      | 4                               | 2                                            | 2                                        | 0                |                    |                    |                    |                    |                        |                        |                        |                        |
| 2190 | P53779    | mitogen-activated protein kinase 10 [OS=Homo sapiens]                                  | 6.7           | 4            | 2          | 71     | 1                 | 272                     | 30                              | 2                                            | 2                                        | 1                | 4.38.E+07          | 4.37.E+07          | 4.62.E+07          | 3.82.E+07          | 3.83.E+07              | 4.19.E+07              | 4.18.E+07              | 4.20.E+07              |
| 2191 | P30622-3  | CAP-Gly domain-containing linker protein 1 [OS=Homo sapiens]                           | 6.6           | 2            | 2          | 4      | 2                 | 15                      | 2                               | 2                                            | 2                                        | 0                | 1.74.E+07          | 1.77.E+07          | 1.72.E+07          | 1.64.E+07          | 2.00.E+07              | 2.14.E+07              | 1.13.E+07              | 1.92.E+07              |
| 2192 | Q9BTE7    | DCN1-like protein 5 [OS=Homo sapiens]                                                  | 6.6           | 18           | 2          | 10     | 2                 | 0                       | 5                               | 2                                            | 2                                        | 0                |                    | 1.19.E+07          | 4.41.E+06          | 1.32.E+07          | 9.80.E+06              | 3.37.E+06              |                        | 8.09.E+06              |
| 2193 | Q9NRG9-1  | Aladin [OS=Homo sapiens]                                                               | 6.6           | 2            | 1          | 25     | 1                 | 84                      | 20                              | 1                                            | 1                                        | 0                | 6.96.E+06          | 8.18.E+06          | 6.39.E+06          | 7.98.E+06          | 1.10.E+07              | 1.05.E+07              |                        | 9.17.E+06              |
| 2194 | P18615    | Negative elongation factor E [OS=Homo sapiens]                                         | 6.6           | 5            | 1          | 2      | 1                 | 58                      | 2                               | 1                                            | 1                                        | 0                | 4.02.E+06          | 3.84.E+06          | 3.28.E+06          | 3.70.E+06          | 6.13.E+06              | 5.19.E+06              | 3.99.E+06              | 4.40.E+06              |
| 2195 | Q9BT73    | Proteasome assembly chaperone 3 [OS=Homo sapiens]                                      | 6.6           | 12           | 1          | 30     | 1                 | 197                     | 30                              | 1                                            | 1                                        | 0                | 1.17.E+07          | 1.26.E+07          | 1.38.E+07          | 1.17.E+07          |                        |                        |                        |                        |
| 2196 | P09417    | dihydropteridine reductase [OS=Homo sapiens]                                           | 6.6           | 5            | 1          | 8      | 1                 | 63                      | 7                               | 1                                            | 1                                        | 0                | 8.80.E+06          | 6.54.E+06          | 6.75.E+06          | 8.88.E+06          | 4.01.E+06              | 5.05.E+06              | 8.38.E+06              | 4.85.E+06              |
| 2197 | Q6WKZ4-4  | Rab11 family-interacting protein 1 [OS=Homo sapiens]                                   | 6.6           | 2            | 1          | 2      | 1                 | 0                       | 3                               | 1                                            | 1                                        | 0                |                    |                    |                    |                    |                        |                        |                        |                        |
| 2198 | Q9Y5J1    | U3 small nucleolar RNA-associated protein 18 homolog [OS=Homo sapiens]                 | 6.5           | 6            | 2          | 14     | 2                 | 0                       | 2                               | 2                                            | 2                                        | 0                | 7.73.E+05          | 8.31.E+05          | 8.66.E+05          | 7.64.E+05          | 8.08.E+05              | 8.91.E+05              | 8.64.E+05              | 9.70.E+05              |
| 2199 | Q9NQX4    | Unconventional myosin-Vc [OS=Homo sapiens]                                             | 6.5           | 1            | 1          | 12     | 1                 | 111                     | 5                               | 1                                            | 1                                        | 0                | 1.46.E+07          | 1.54.E+07          | 1.72.E+07          | 1.44.E+07          | 1.18.E+07              | 1.29.E+07              | 1.17.E+07              | 1.35.E+07              |
| 2200 | Q14165    | Malectin [OS=Homo sapiens]                                                             | 6.5           | 12           | 2          | 6      | 2                 | 38                      | 6                               | 2                                            | 2                                        | 0                | 1.47.E+07          | 4.64.E+06          | 1.68.E+07          |                    | 1.81.E+07              | 6.32.E+06              | 1.18.E+07              | 1.71.E+07              |
| 2201 | Q9Y3B2    | Exosome complex component csl4 [OS=Homo sapiens]                                       | 6.5           | 8            | 1          | 6      | 1                 | 103                     | 7                               | 1                                            | 1                                        | 0                | 7.65.E+06          | 7.81.E+06          | 8.73.E+06          | 6.61.E+06          | 8.12.E+06              | 7.46.E+06              | 6.77.E+06              | 7.86.E+06              |
| 2202 | Q9NP66    | High mobility group protein 20A [OS=Homo sapiens]                                      | 6.5           | 5            | 1          | 14     | 1                 | 109                     | 2                               | 1                                            | 1                                        | 0                | 4.89.E+06          | 7.00.E+06          | 9.22.E+06          | 8.08.E+06          | 1.18.E+07              | 9.92.E+06              | 9.49.E+06              | 1.01.E+07              |
| 2203 | Q8N8N7-1  | Prostaglandin reductase 2 [OS=Homo sapiens]                                            | 6.5           | 13           | 2          | 16     | 2                 | 38                      | 2                               | 2                                            | 2                                        | 0                | 6.47.E+06          | 6.78.E+06          | 5.66.E+06          | 7.40.E+06          | 1.35.E+07              | 1.18.E+07              | 1.01.E+07              | 1.14.E+07              |
| 2204 | P49459-1  | Ubiquitin-conjugating enzyme E2 A [OS=Homo sapiens]                                    | 6.5           | 11           | 1          | 24     | 1                 | 195                     | 26                              | 1                                            | 1                                        | 0                | 1.88.E+07          | 2.08.E+07          | 2.09.E+07          | 1.80.E+07          | 2.26.E+07              | 2.05.E+07              | 2.32.E+07              | 2.13.E+07              |
| 2205 | P56556    | NADH dehydrogenase [ubiquinone] 1 alpha subcomplex subunit 6 [OS=Homo sapiens]         | 6.4           | 10           | 1          | 1      | 1                 |                         | 3                               | 1                                            |                                          | 0                |                    |                    |                    |                    | 2.70.E+07              | 3.20.E+07              | 3.10.E+07              | 3.25.E+07              |
| 2206 | Q15345-2  | Leucine-rich repeat-containing protein 41 [OS=Homo sapiens]                            | 6.4           | 2            | 1          | 8      | 1                 | 91                      | 0                               | 1                                            | 1                                        | 0                | 5.28.E+06          | 6.03.E+06          | 3.61.E+06          | 5.82.E+06          | 4.38.E+06              | 4.15.E+06              | 3.18.E+06              | 4.36.E+06              |
| 2207 | Q8WXA9-2  | Isoform 2 of Splicing regulatory glutamine/lysine-rich protein 1 [OS=Homo sapiens]     | 6.4           | 2            | 1          | 5      | 1                 |                         | 10                              | 1                                            |                                          | 0                | 1.09.E+07          | 1.16.E+07          | 1.04.E+07          | 1.30.E+07          |                        | 1.00.E+07              | 7.92.E+06              |                        |
| 2208 | P40123    | Adenylyl cyclase-associated protein 2 [OS=Homo sapiens]                                | 6.4           | 3            | 1          | 4      | 1                 | 47                      | 5                               | 1                                            | 1                                        | 0                | 2.25.E+06          | 5.14.E+06          | 2.01.E+06          | 3.16.E+06          | 7.00.E+06              | 7.23.E+06              | 5.57.E+06              | 9.29.E+06              |
| 2209 | O75691    | Small subunit processome component 20 homolog [OS=Homo sapiens]                        | 6.4           | 1            | 2          | 23     | 2                 | 30                      | 0                               | 2                                            | 2                                        | 0                | 1.09.E+07          | 1.24.E+07          | 8.49.E+06          | 1.31.E+07          | 1.43.E+07              | 1.36.E+07              | 1.08.E+07              | 1.28.E+07              |
| 2210 | Q16539    | Mitogen-activated protein kinase 14 [OS=Homo sapiens]                                  | 6.4           | 6            | 2          | 68     | 1                 | 284                     | 30                              | 2                                            | 2                                        | 0                | 5.98.E+06          | 5.43.E+06          | 5.64.E+06          | 5.86.E+06          | 6.46.E+06              | 7.94.E+06              | 5.02.E+06              | 8.00.E+06              |
| 2211 | Q96JB5    | CDK5 regulatory subunit-associated protein 3 [OS=Homo sapiens]                         | 6.4           | 4            | 3          | 13     | 2                 | 0                       | 3                               | 3                                            | 2                                        | 0                | 2.50.E+07          | 2.29.E+07          | 2.48.E+07          | 5.51.E+06          | 3.10.E+07              | 2.58.E+07              | 3.11.E+07              | 2.81.E+07              |
| 2212 | Q9NY27    | Serine/threonine-protein phosphatase 4 regulatory subunit 2 [OS=Homo sapiens]          | 6.3           | 4            | 1          | 13     | 1                 | 37                      | 0                               | 1                                            | 1                                        | 0                | 1.26.E+07          | 1.48.E+07          | 3.91.E+06          | 1.84.E+07          | 1.15.E+07              | 1.56.E+07              | 9.84.E+06              | 1.41.E+07              |
| 2213 | Q5XKP0    | MICOS complex subunit MIC13 [OS=Homo sapiens]                                          | 6.3           | 32           | 2          | 30     | 2                 | 103                     | 10                              | 2                                            | 1                                        | 0                | 1.81.E+07          | 2.00.E+07          | 1.70.E+07          | 1.90.E+07          | 7.07.E+07              | 5.01.E+07              | 7.07.E+07              | 6.82.E+07              |
| 2214 | Q5TBC7-1  | Bcl-2-like protein 15 [OS=Homo sapiens]                                                | 6.3           | 8            | 1          | 2      | 1                 | 36                      | 2                               | 1                                            | 1                                        | 0                | 4.54.E+06          | 5.99.E+06          | 4.13.E+06          | 4.46.E+06          | 1.40.E+07              | 1.31.E+07              | 1.14.E+07              | 1.12.E+07              |
| 2215 | Q9NX20    | 39S ribosomal protein L16, mitochondrial [OS=Homo sapiens]                             | 6.2           | 6            | 1          | 4      | 1                 | 24                      | 5                               | 1                                            | 1                                        | 0                | 8.93.E+06          | 7.68.E+06          | 5.92.E+06          | 6.36.E+06          | 1.03.E+07              | 9.55.E+06              | 8.41.E+06              | 1.09.E+07              |
| 2216 | Q5RKV6    | Exosome complex component MTR3 [OS=Homo sapiens]                                       | 6.2           | 6            | 1          | 28     | 1                 | 384                     | 23                              | 1                                            | 1                                        | 0                | 1.05.E+07          | 9.22.E+06          | 9.40.E+06          | 1.06.E+07          | 1.01.E+07              | 1.06.E+07              | 1.15.E+07              | 1.09.E+07              |
| 2217 | O15400    | Syntaxin-7 [OS=Homo sapiens]                                                           | 6.2           | 6            | 1          | 20     | 1                 | 251                     | 25                              | 1                                            | 1                                        | 0                | 1.42.E+07          | 1.28.E+07          | 1.37.E+07          | 1.31.E+07          | 1.54.E+07              | 1.64.E+07              | 1.59.E+07              | 1.76.E+07              |
| 2218 | Q92990    | Glomulin [OS=Homo sapiens]                                                             | 6.2           | 4            | 2          | 5      | 2                 | 28                      | 2                               | 1                                            | 2                                        | 0                | 8.92.E+06          | 8.77.E+06          | 9.08.E+06          | 1.08.E+07          | 1.07.E+07              | 9.87.E+06              | 8.06.E+06              | 8.62.E+06              |
| 2219 | Q92643    | GPI-anchor transamidase [OS=Homo sapiens]                                              | 6.2           | 3            | 1          | 8      | 1                 | 150                     | 10                              | 1                                            | 1                                        | 0                | 1.65.E+07          | 2.59.E+07          | 1.94.E+07          | 2.33.E+07          | 2.47.E+07              | 2.72.E+07              | 2.47.E+07              | 2.63.E+07              |
| 2220 | P60033    | CD81 antigen [OS=Homo sapiens]                                                         | 6.2           | 7            | 1          | 4      | 1                 | 32                      | 4                               | 1                                            | 1                                        | 0                |                    | 3.54.E+07          |                    | 3.09.E+07          | 4.71.E+07              |                        | 2.36.E+07              | 7.07.E+07              |
| 2221 | Q9GZT8-1  | NIF3-like protein 1 [OS=Homo sapiens]                                                  | 6.2           | 6            | 1          | 32     | 1                 | 43                      | 52                              | 1                                            | 1                                        | 0                | 2.24.E+07          | 3.46.E+07          | 2.65.E+07          | 3.14.E+07          | 3.05.E+07              | 2.89.E+07              | 3.05.E+07              | 3.31.E+07              |
| 2222 | Q9HC07    | Transmembrane protein 165 [OS=Homo sapiens]                                            | 6.2           | 8            | 1          | 4      | 1                 | 62                      | 3                               | 1                                            | 1                                        | 0                | 1.10.E+07          | 9.99.E+06          | 8.54.E+06          | 1.05.E+07          | 2.23.E+07              | 2.32.E+07              | 1.95.E+07              | 2.06.E+07              |
| 2223 | Q92620    | Pre-mRNA-splicing factor ATP-dependent RNA helicase PRP16 [OS=Homo sapiens]            | 6.1           | 1            | 1          | 22     | 1                 | 157                     | 19                              | 1                                            | 1                                        | 0                | 4.51.E+06          | 5.57.E+06          | 3.94.E+06          | 3.88.E+06          | 8.28.E+06              | 7.69.E+06              | 5.93.E+06              | 7.34.E+06              |
| 2224 | P19838    | Nuclear factor NF-kappa-B p105 subunit [OS=Homo sapiens]                               | 6.1           | 2            | 1          | 15     | 1                 | 37                      | 2                               | 1                                            | 1                                        | 0                | 7.44.E+06          | 8.02.E+06          | 7.91.E+06          | 8.25.E+06          | 7.93.E+06              | 7.19.E+06              | 1.06.E+07              | 9.76.E+06              |
| 2225 | Q14677-1  | Clathrin interactor 1 [OS=Homo sapiens]                                                | 6.1           | 4            | 2          | 8      | 2                 | 51                      | 2                               | 2                                            | 2                                        | 0                | 1.29.E+07          | 1.34.E+07          | 1.05.E+07          | 8.61.E+06          | 9.81.E+06              | 9.93.E+06              | 1.29.E+07              | 1.20.E+07              |
| 2226 | Q9NV52    | 39S ribosomal protein S18a, mitochondrial [OS=Homo sapiens]                            | 6.1           | 8            | 1          | 30     | 1                 | 282                     | 5                               | 1                                            | 1                                        | 0                | 6.83.E+06          | 9.07.E+06          | 6.21.E+06          | 7.29.E+06          | 9.94.E+06              | 9.23.E+06              | 7.49.E+06              | 8.44.E+06              |
| 2227 | Q9H336    | Cysteine-rich secretory protein LCCL domain-containing 1 [OS=Homo sapiens]             | 6.1           | 3            | 1          | 12     | 1                 | 21                      | 15                              | 1                                            | 1                                        | 0                | 4.29.E+06          | 3.37.E+06          | 4.71.E+06          | 5.43.E+06          | 4.10.E+06              | 3.48.E+06              |                        | 4.13.E+06              |
| 2228 | Q9P032    | NADH dehydrogenase [ubiquinone] 1 alpha subcomplex assembly factor 4 [OS=Homo sapiens] | 6.0           | 8            | 1          | 12     | 1                 | 59                      | 0                               | 1                                            | 1                                        | 0                | 1.02.E+06          | 2.19.E+06          | 1.81.E+06          | 1.85.E+06          | 1.05.E+07              | 8.50.E+06              | 7.81.E+06              | 1.07.E+07              |
| 2229 | O95793    | double-stranded RNA-binding protein Staufen homolog 1 [OS=Homo sapiens]                | 6.0           | 6            | 2          | 17     | 2                 | 14                      | 15                              | 2                                            | 2                                        | 0                | 3.34.E+07          | 3.63.E+07          | 3.69.E+07          | 3.03.E+07          | 4.53.E+07              | 4.83.E+07              | 4.44.E+07              | 4.46.E+07              |
| 2230 | Q96KP1    | exocyst complex component 2 [OS=Homo sapiens]                                          | 6.0           | 3            | 2          | 6      | 2                 | 25                      | 4                               | 2                                            | 2                                        | 0                | 1.01.E+06          | 2.05.E+06          | 1.12.E+06          | 1.32.E+06          | 5.71.E+06              | 4.95.E+06              | 4.27.E+06              | 5.54.E+06              |
| 2231 | O00515    | Ladinin-1 [OS=Homo sapiens]                                                            | 6.0           | 5            | 2          | 4      | 2                 | 0                       | 4                               | 2                                            | 2                                        | 0                | 1.34.E+07          | 1.34.E+07          | 1.43.E+07          | 1.04.E+07          | 6.78.E+06              | 6.96.E+06              | 8.09.E+06              | 6.35.E+06              |
| 2232 | Q92783    | signal transducing adapter molecule 1 [OS=Homo sapiens]                                | 5.9           | 4            | 2          | 54     | 2                 | 0                       | 15                              | 1                                            | 2                                        | 0                | 4.46.E+07          | 4.37.E+07          | 3.09.E+07          | 3.69.E+07          | 3.60.E+07              | 2.42.E+07              | 3.97.E+07              | 3.67.E+07              |

| No.  | Accession | Description                                                                           | Sum PEP Score | Coverage [%] | # Peptides | # PSMs | # Unique Peptides | Score Mascot: A5 Mascot | Score Sequest HT: A2 Sequest HT | # Peptides (by Search Engine): A2 Sequest HT | # Peptides (by Search Engine): A5 Mascot | # Razor Peptides | ctrl Abundance s_1 | ctrl Abundance s_2 | ctrl Abundance s_3 | ctrl Abundance s_4 | JAM-A KO Abundance s_1 | JAM-A KO Abundance s_2 | JAM-A KO Abundance s_3 | JAM-A KO Abundance s_4 |
|------|-----------|---------------------------------------------------------------------------------------|---------------|--------------|------------|--------|-------------------|-------------------------|---------------------------------|----------------------------------------------|------------------------------------------|------------------|--------------------|--------------------|--------------------|--------------------|------------------------|------------------------|------------------------|------------------------|
| 2233 | Q9UKF6    | Cleavage and polyadenylation specificity factor subunit 3 [OS=Homo sapiens]           | 5.9           | 3            | 2          | 9      | 2                 | 32                      | 0                               | 2                                            | 1                                        | 0                | 2.75.E+07          | 2.90.E+07          | 2.67.E+07          | 2.57.E+07          | 3.15.E+07              | 3.27.E+07              | 1.19.E+07              | 2.90.E+07              |
| 2234 | Q9Y2Z4    | Tyrosine-tRNA ligase, mitochondrial [OS=Homo sapiens]                                 | 5.9           | 7            | 2          | 6      | 2                 | 26                      | 2                               | 2                                            | 2                                        | 0                | 9.97.E+06          | 1.17.E+07          | 9.46.E+06          | 1.20.E+07          | 1.31.E+07              | 1.20.E+07              | 1.05.E+07              | 1.29.E+07              |
| 2235 | Q9Y2K7    | Lysine-specific demethylase 2A [OS=Homo sapiens]                                      | 5.9           | 2            | 2          | 6      | 2                 | 28                      | 4                               | 2                                            | 0                                        | 1.27.E+07        | 1.32.E+07          | 1.35.E+07          | 1.52.E+07          | 1.25.E+07          | 9.24.E+06              | 1.19.E+07              | 1.24.E+07              |                        |
| 2236 | Q9BWU0    | kanadapin [OS=Homo sapiens]                                                           | 5.9           | 1            | 1          | 10     | 1                 | 93                      | 7                               | 1                                            | 1                                        | 0                | 1.48.E+07          | 1.54.E+07          | 1.45.E+07          | 1.42.E+07          | 1.49.E+07              | 1.49.E+07              | 1.76.E+07              |                        |
| 2237 | Q9HD15    | Steroid receptor RNA activator 1 [OS=Homo sapiens]                                    | 5.9           | 5            | 1          | 6      | 1                 | 44                      | 6                               | 1                                            | 1                                        | 0                | 7.83.E+06          | 8.05.E+06          | 9.12.E+06          | 9.47.E+06          | 1.11.E+07              | 1.02.E+07              | 1.03.E+07              | 9.14.E+06              |
| 2238 | Q14517    | Protocadherin Fat 1 [OS=Homo sapiens]                                                 | 5.9           | 1            | 2          | 11     | 2                 | 67                      | 0                               | 2                                            | 2                                        | 0                | 5.93.E+06          | 5.60.E+06          | 5.18.E+06          | 6.51.E+06          | 8.67.E+06              | 7.87.E+06              | 8.67.E+06              | 7.87.E+06              |
| 2239 | Q9UPN6    | Protein SCAF8 [OS=Homo sapiens]                                                       | 5.9           | 1            | 1          | 2      | 1                 | 36                      | 3                               | 1                                            | 1                                        | 0                | 2.59.E+07          | 2.57.E+07          | 3.90.E+06          | 2.84.E+07          | 1.56.E+07              | 2.53.E+07              | 1.12.E+07              | 2.35.E+07              |
| 2240 | P67870    | Casein kinase II subunit beta [OS=Homo sapiens]                                       | 5.9           | 4            | 1          | 41     | 1                 | 33                      | 16                              | 1                                            | 1                                        | 0                | 3.43.E+07          | 3.34.E+07          | 3.54.E+07          | 2.79.E+07          | 2.45.E+07              | 2.70.E+07              | 3.16.E+07              | 2.71.E+07              |
| 2241 | Q9NPA0    | ER membrane protein complex subunit 7 [OS=Homo sapiens]                               | 5.9           | 16           | 2          | 5      | 2                 | 14                      | 5                               | 1                                            | 2                                        | 0                | 1.68.E+07          | 2.40.E+07          | 3.23.E+07          | 2.55.E+07          | 5.15.E+07              | 2.29.E+07              | 2.87.E+07              | 3.42.E+07              |
| 2242 | Q02952-1  | A-kinase anchor protein 12 [OS=Homo sapiens]                                          | 5.9           | 1            | 1          | 6      | 1                 | 35                      | 5                               | 1                                            | 1                                        | 0                | 3.86.E+06          | 3.91.E+06          | 7.14.E+05          |                    | 1.24.E+07              | 5.06.E+06              | 4.10.E+06              | 1.10.E+07              |
| 2243 | Q8IUR7-1  | Armadillo repeat-containing protein 8 [OS=Homo sapiens]                               | 5.8           | 3            | 1          | 16     | 1                 | 96                      | 10                              | 1                                            | 1                                        | 0                | 4.70.E+06          | 5.58.E+06          | 5.25.E+06          | 5.40.E+06          | 4.64.E+06              | 4.24.E+06              | 2.95.E+06              | 4.62.E+06              |
| 2244 | Q9UBU9-1  | nuclear RNA export factor 1 [OS=Homo sapiens]                                         | 5.8           | 2            | 1          | 16     | 1                 | 42                      | 9                               | 1                                            | 1                                        | 0                | 7.90.E+06          | 1.29.E+07          | 1.04.E+07          | 9.03.E+06          | 9.23.E+06              | 9.28.E+06              | 9.04.E+06              | 1.01.E+07              |
| 2245 | Q9UNX4    | WD repeat-containing protein 3 [OS=Homo sapiens]                                      | 5.8           | 4            | 2          | 7      | 2                 | 21                      | 2                               | 1                                            | 2                                        | 0                | 1.21.E+07          | 1.46.E+07          |                    | 1.32.E+07          | 9.11.E+06              | 4.58.E+06              |                        |                        |
| 2246 | O75832    | 26S proteasome non-ATPase regulatory subunit 10 [OS=Homo sapiens]                     | 5.8           | 15           | 2          | 6      | 2                 | 14                      | 0                               | 2                                            | 2                                        | 0                | 3.03.E+07          | 3.05.E+07          | 3.44.E+07          | 2.51.E+07          | 4.90.E+07              | 4.41.E+07              | 5.01.E+07              | 4.94.E+07              |
| 2247 | Q9Y3D7    | Mitochondrial import inner membrane translocase subunit TIM16 [OS=Homo sapiens]       | 5.8           | 18           | 1          | 4      | 1                 | 52                      | 4                               | 1                                            | 1                                        | 0                | 4.50.E+06          | 4.47.E+06          | 3.75.E+06          |                    | 4.02.E+06              | 4.73.E+06              | 8.35.E+05              | 4.06.E+06              |
| 2248 | Q6GMV2    | SET and MYND domain-containing protein 5 [OS=Homo sapiens]                            | 5.7           | 6            | 1          | 2      | 1                 | 40                      | 2                               | 1                                            | 1                                        | 0                |                    |                    |                    |                    |                        |                        |                        |                        |
| 2249 | O43670-1  | BUB3-interacting and GLEBS motif-containing protein ZNF207 [OS=Homo sapiens]          | 5.7           | 3            | 1          | 10     | 1                 | 107                     | 12                              | 1                                            | 1                                        | 0                | 2.37.E+07          | 2.39.E+07          | 2.41.E+07          | 2.51.E+07          | 3.71.E+07              | 3.37.E+07              | 3.69.E+07              | 3.06.E+07              |
| 2250 | P82673-1  | 28S ribosomal protein S35, mitochondrial [OS=Homo sapiens]                            | 5.7           | 3            | 1          | 28     | 1                 | 138                     | 5                               | 1                                            | 1                                        | 0                | 6.92.E+06          | 1.03.E+07          | 4.36.E+06          | 1.33.E+07          | 1.11.E+07              | 1.12.E+07              | 8.59.E+06              | 1.11.E+07              |
| 2251 | Q16783    | ubiquitin-conjugating enzyme E2 S [OS=Homo sapiens]                                   | 5.7           | 13           | 2          | 9      | 2                 | 14                      | 4                               | 2                                            | 2                                        | 0                | 3.52.E+07          | 1.08.E+07          | 3.06.E+07          | 3.82.E+07          | 7.29.E+06              | 6.50.E+06              | 8.76.E+06              | 5.57.E+06              |
| 2252 | Q5QJ6E    | Deoxynucleotidyltransferase terminal-interacting protein 2 [OS=Homo sapiens]          | 5.7           | 4            | 2          | 14     | 2                 | 32                      | 2                               | 2                                            | 2                                        | 0                | 1.01.E+08          | 1.02.E+08          | 2.74.E+07          | 1.08.E+08          | 1.00.E+08              | 1.28.E+08              | 6.79.E+07              | 1.15.E+08              |
| 2253 | Q7Z739    | YTH domain-containing family protein 3 [OS=Homo sapiens]                              | 5.7           | 4            | 2          | 12     | 2                 | 13                      | 9                               | 2                                            | 1                                        | 0                | 3.52.E+07          | 3.86.E+07          | 3.69.E+07          | 3.56.E+07          | 4.12.E+07              | 4.58.E+07              | 4.13.E+07              | 4.27.E+07              |
| 2254 | Q99735    | microsomal glutathione S-transferase 2 [OS=Homo sapiens]                              | 5.7           | 10           | 1          | 16     | 1                 | 155                     | 18                              | 1                                            | 1                                        | 0                | 3.11.E+07          | 2.77.E+07          | 3.04.E+07          | 2.78.E+07          | 2.42.E+07              | 2.37.E+07              | 2.48.E+07              | 2.76.E+07              |
| 2255 | P82933    | 28S ribosomal protein S9, mitochondrial [OS=Homo sapiens]                             | 5.7           | 3            | 1          | 10     | 1                 | 99                      | 13                              | 1                                            | 1                                        | 0                | 1.01.E+07          | 2.02.E+07          | 9.52.E+06          | 1.31.E+07          | 1.99.E+07              | 1.78.E+07              | 1.50.E+07              | 1.91.E+07              |
| 2256 | P00846    | ATP synthase subunit A [OS=Homo sapiens]                                              | 5.6           | 4            | 1          | 62     | 1                 | 214                     | 74                              | 1                                            | 1                                        | 0                | 1.04.E+08          | 1.13.E+08          | 1.09.E+08          | 9.82.E+07          | 1.10.E+08              | 1.17.E+08              | 1.13.E+08              | 1.18.E+08              |
| 2257 | Q9BSH4    | Translational activator of cytochrome c oxidase 1 [OS=Homo sapiens]                   | 5.6           | 4            | 1          | 2      | 1                 | 22                      | 2                               | 1                                            | 1                                        | 0                | 2.59.E+07          | 2.35.E+07          | 2.50.E+07          | 2.73.E+07          | 1.62.E+07              | 1.25.E+07              | 1.79.E+07              | 1.62.E+07              |
| 2258 | P60059    | Protein transport protein Sec61 subunit gamma [OS=Homo sapiens]                       | 5.6           | 18           | 1          | 4      | 1                 | 59                      | 5                               | 1                                            | 1                                        | 0                | 1.24.E+07          | 1.40.E+07          | 1.12.E+07          | 1.41.E+07          | 1.14.E+07              | 1.07.E+07              | 9.52.E+06              | 1.08.E+07              |
| 2259 | P51159-1  | Ras-related protein Rab-27A [OS=Homo sapiens]                                         | 5.6           | 10           | 2          | 45     | 2                 | 14                      | 21                              | 2                                            | 2                                        | 0                | 3.14.E+07          | 3.10.E+07          | 3.14.E+07          | 3.06.E+07          | 3.10.E+07              | 2.95.E+07              | 1.96.E+07              | 2.07.E+07              |
| 2260 | O95249-1  | Golgi SNAP receptor complex member 1 [OS=Homo sapiens]                                | 5.6           | 5            | 1          | 1      | 1                 | 32                      |                                 |                                              | 1                                        | 0                | 2.33.E+07          |                    |                    | 2.09.E+07          | 4.03.E+07              | 4.54.E+07              | 3.59.E+07              | 3.91.E+07              |
| 2261 | Q9NX55-2  | Huntingtin-interacting protein K [OS=Homo sapiens]                                    | 5.6           | 12           | 1          | 84     | 1                 | 1705                    | 73                              | 1                                            | 1                                        | 0                | 3.00.E+07          | 3.28.E+07          | 2.82.E+07          | 3.59.E+07          | 3.32.E+07              | 2.91.E+07              | 2.75.E+07              | 2.89.E+07              |
| 2262 | P61086    | Ubiquitin-conjugating enzyme E2 K [OS=Homo sapiens]                                   | 5.6           | 14           | 2          | 4      | 2                 | 19                      | 0                               | 2                                            | 2                                        | 0                | 9.13.E+06          | 8.30.E+06          | 1.16.E+07          | 1.39.E+07          | 1.23.E+07              | 1.26.E+07              | 1.95.E+07              | 7.34.E+07              |
| 2263 | Q9BY42    | protein RTF2 homolog [OS=Homo sapiens]                                                | 5.6           | 6            | 1          | 4      | 1                 | 42                      | 5                               | 1                                            | 1                                        | 0                | 5.37.E+06          | 4.49.E+06          | 7.47.E+06          | 6.58.E+06          | 4.54.E+06              | 5.61.E+06              | 5.58.E+06              | 6.63.E+06              |
| 2264 | Q9HA64    | Ketosamine-3-kinase [OS=Homo sapiens]                                                 | 5.6           | 6            | 2          | 34     | 2                 | 0                       | 0                               | 2                                            | 1                                        | 0                | 3.88.E+07          | 3.59.E+07          | 3.88.E+07          | 3.18.E+07          | 2.25.E+07              | 2.77.E+07              | 3.20.E+07              | 2.87.E+07              |
| 2265 | Q8NFH4    | Nucleoporin Nup37 [OS=Homo sapiens]                                                   | 5.5           | 4            | 1          | 4      | 1                 | 52                      | 2                               | 1                                            | 1                                        | 0                |                    |                    |                    |                    |                        |                        |                        |                        |
| 2266 | Q9UPQ0-1  | LIM and calponin homology domains-containing protein 1 [OS=Homo sapiens]              | 5.5           | 2            | 2          | 10     | 2                 | 62                      | 2                               | 2                                            | 2                                        | 0                | 8.53.E+06          | 1.16.E+07          | 1.17.E+07          | 9.90.E+06          | 7.92.E+06              |                        | 8.21.E+06              | 1.05.E+07              |
| 2267 | O75438    | NADH dehydrogenase [ubiquinone] 1 beta subcomplex subunit 1 [OS=Homo sapiens]         | 5.5           | 19           | 1          | 18     | 1                 | 139                     | 21                              | 1                                            | 1                                        | 0                | 4.05.E+07          | 3.64.E+07          | 3.98.E+07          | 3.60.E+07          | 3.60.E+07              | 4.08.E+07              | 4.49.E+07              | 3.87.E+07              |
| 2268 | Q9H0H5    | Rac GTPase-activating protein 1 [OS=Homo sapiens]                                     | 5.5           | 3            | 2          | 22     | 2                 | 58                      | 2                               | 2                                            | 2                                        | 0                | 3.93.E+07          | 3.71.E+07          | 4.17.E+07          | 2.96.E+07          | 3.80.E+07              | 4.83.E+07              | 5.97.E+07              | 4.10.E+07              |
| 2269 | Q13131    | 5'-AMP-activated protein kinase catalytic subunit alpha-1 [OS=Homo sapiens]           | 5.5           | 3            | 1          | 4      | 1                 | 95                      | 5                               | 1                                            | 1                                        | 0                | 8.92.E+06          | 9.76.E+06          | 7.52.E+06          | 8.78.E+06          | 1.28.E+07              | 1.27.E+07              | 1.39.E+07              | 1.14.E+07              |
| 2270 | Q9UJY5-1  | ADP-ribosylation factor-binding protein GGA1 [OS=Homo sapiens]                        | 5.5           | 10           | 2          | 21     | 2                 | 0                       | 0                               | 2                                            | 2                                        | 0                | 1.79.E+07          | 2.07.E+07          | 1.78.E+07          | 2.17.E+07          | 2.63.E+07              | 2.03.E+07              | 2.22.E+07              | 2.47.E+07              |
| 2271 | Q9BQB6-1  | vitamin K epoxide reductase complex subunit 1 [OS=Homo sapiens]                       | 5.5           | 8            | 1          | 13     | 1                 | 26                      | 11                              | 1                                            | 1                                        | 0                | 5.18.E+07          | 3.01.E+07          | 4.96.E+07          | 3.98.E+07          | 4.51.E+07              | 3.94.E+07              | 5.65.E+07              | 4.51.E+07              |
| 2272 | P49207    | 60S ribosomal protein L34 [OS=Homo sapiens]                                           | 5.5           | 13           | 2          | 154    | 2                 | 670                     | 106                             | 2                                            | 2                                        | 0                | 5.74.E+08          | 5.48.E+08          | 5.73.E+08          | 6.34.E+08          | 5.75.E+08              | 4.89.E+08              | 5.47.E+08              | 5.37.E+08              |
| 2273 | Q96FX7    | tRNA (adenine(58)-N(1))-methyltransferase catalytic subunit TRMT61A [OS=Homo sapiens] | 5.5           | 13           | 2          | 29     | 2                 | 194                     | 16                              | 1                                            | 2                                        | 0                | 1.88.E+08          | 2.01.E+08          | 1.62.E+08          | 6.57.E+06          | 1.92.E+08              | 2.05.E+08              | 1.70.E+08              | 1.86.E+08              |
| 2274 | O00506    | serine/threonine-protein kinase 25 [OS=Homo sapiens]                                  | 5.5           | 5            | 2          | 36     | 1                 | 39                      | 2                               | 2                                            | 2                                        | 1                | 2.88.E+07          | 3.10.E+07          | 3.19.E+07          | 2.91.E+07          | 2.75.E+07              | 3.20.E+07              | 3.21.E+07              | 2.78.E+07              |
| 2275 | Q99584    | Protein S100-A13 [OS=Homo sapiens]                                                    | 5.4           | 12           | 1          | 2      | 1                 | 24                      | 3                               | 1                                            | 1                                        | 0                | 2.65.E+07          | 2.55.E+07          | 2.25.E+07          | 2.17.E+07          | 1.89.E+07              | 1.97.E+07              | 1.90.E+07              | 1.77.E+07              |
| 2276 | Q4G0F5    | Vacuolar protein sorting-associated protein 26B [OS=Homo sapiens]                     | 5.4           | 3            | 1          | 17     | 1                 | 152                     | 16                              | 1                                            | 1                                        | 0                | 1.81.E+07          | 1.55.E+07          | 1.87.E+07          | 1.82.E+07          | 1.91.E+07              | 2.03.E+07              | 2.41.E+07              | 2.47.E+07              |
| 2277 | Q9Y6K5    | 2'-5'-oligoadenylate synthase 3 [OS=Homo sapiens]                                     | 5.4           | 3            | 1          | 6      | 1                 | 43                      | 2                               | 1                                            | 1                                        | 0                | 1.00.E+07          | 9.35.E+06          | 2.01.E+06          | 1.03.E+07          | 1.44.E+07              | 1.18.E+07              | 1.04.E+07              | 1.22.E+07              |
| 2278 | Q7Z417    | Nuclear fragile X mental retardation-interacting protein 2 [OS=Homo sapiens]          | 5.4           | 2            | 1          | 8      | 1                 | 62                      | 4                               | 1                                            | 1                                        | 0                | 1.07.E+07          | 1.11.E+07          | 9.76.E+06          | 1.18.E+07          | 1.20.E+07              | 1.07.E+07              | 1.50.E+07              | 9.96.E+06              |
| 2279 | P36543    | V-type proton ATPase subunit E 1 [OS=Homo sapiens]                                    | 5.4           | 6            | 1          | 2      | 1                 | 29                      | 3                               | 1                                            | 1                                        | 0                | 1.28.E+07          | 1.94.E+07          | 1.42.E+07          | 1.25.E+07          | 2.68.E+07              | 2.40.E+07              | 2.07.E+07              | 2.80.E+07              |
| 2280 | Q969T9    | WW domain-binding protein 2 [OS=Homo sapiens]                                         | 5.4           | 4            | 1          | 8      | 1                 | 21                      | 9                               | 1                                            | 1                                        | 0                | 7.30.E+06          | 2.33.E+07          | 8.51.E+06          | 8.66.E+06          | 6.81.E+06              | 2.44.E+07              | 7.12.E+06              | 2.56.E+07              |
| 2281 | O00244    | Copper transport protein ATOX1 [OS=Homo sapiens]                                      | 5.4           | 25           | 1          | 10     | 1                 | 27                      | 4                               | 1                                            | 1                                        | 0                | 1.57.E+07          | 1.91.E+07          | 1.32.E+07          | 1.71.E+07          | 1.66.E+07              | 1.49.E+07              | 1.50.E+07              | 1.64.E+07              |
| 2282 | Q6NVY1    | 3-hydroxyisobutyryl-CoA hydrolase, mitochondrial [OS=Homo sapiens]                    | 5.3           | 5            | 2          | 28     | 2                 | 66                      | 2                               | 2                                            | 2                                        | 0                | 3.82.E+07          | 3.45.E+07          | 3.81.E+07          | 3.85.E+07          | 4.00.E+07              | 3.86.E+07              | 4.31.E+07              | 3.94.E+07              |
| 2283 | P52655-1  | Transcription initiation factor IIA subunit 1 [OS=Homo sapiens]                       | 5.3           | 3            | 1          | 2      | 1                 | 33                      | 3                               | 1                                            | 1                                        | 0                | 4.27.E+07          | 3.04.E+07          | 4.21.E+07          | 4.60.E+07          | 4.46.E+07              | 4.59.E+07              | 1.95.E+07              | 3.29.E+07              |



| No.  | Accession | Description                                                                               | Sum PEP Score | Coverage [%] | # Peptides | # PSMs | # Unique Peptides | Score Mascot: A5 Mascot | Score Sequest HT: A2 Sequest HT | # Peptides (by Search Engine): A2 Sequest HT | # Peptides (by Search Engine): A5 Mascot | # Razor Peptides | ctrl Abundance s_1 | ctrl Abundance s_2 | ctrl Abundance s_3 | ctrl Abundance s_4 | JAM-A KO Abundance s_1 | JAM-A KO Abundance s_2 | JAM-A KO Abundance s_3 | JAM-A KO Abundance s_4 |
|------|-----------|-------------------------------------------------------------------------------------------|---------------|--------------|------------|--------|-------------------|-------------------------|---------------------------------|----------------------------------------------|------------------------------------------|------------------|--------------------|--------------------|--------------------|--------------------|------------------------|------------------------|------------------------|------------------------|
| 2284 | O60313    | Dynamin-like 120 kDa protein, mitochondrial [OS=Homo sapiens]                             | 5.3           | 4            | 2          | 8      | 2                 | 27                      | 2                               | 2                                            | 2                                        | 0                | 6.14.E+06          | 8.04.E+06          | 6.79.E+06          | 1.25.E+07          | 1.75.E+07              | 1.55.E+07              | 1.45.E+07              | 1.58.E+07              |
| 2285 | Q8TBX8-1  | Phosphatidylinositol 5-phosphate 4-kinase type-2 gamma [OS=Homo sapiens]                  | 5.3           | 4            | 1          | 6      | 1                 | 33                      | 0                               | 1                                            | 1                                        | 0                | 5.10.E+06          | 5.02.E+06          | 3.22.E+06          | 4.94.E+06          | 2.88.E+06              | 2.23.E+06              | 2.24.E+06              | 2.11.E+06              |
| 2286 | P78406    | mRNA export factor [OS=Homo sapiens]                                                      | 5.3           | 4            | 1          | 32     | 1                 | 203                     | 32                              | 1                                            | 1                                        | 0                | 2.11.E+07          | 2.41.E+07          | 2.16.E+07          | 1.86.E+07          | 2.62.E+07              | 2.81.E+07              | 2.28.E+07              | 2.21.E+07              |
| 2287 | P09497-1  | clathrin light chain B [OS=Homo sapiens]                                                  | 5.3           | 9            | 2          | 14     | 2                 | 37                      | 14                              | 2                                            | 2                                        | 0                | 2.85.E+07          | 2.48.E+07          | 3.18.E+07          | 3.47.E+07          | 2.84.E+07              | 2.80.E+07              | 3.27.E+07              | 3.05.E+07              |
| 2288 | Q4G0J3    | La-related protein 7 [OS=Homo sapiens]                                                    | 5.3           | 2            | 1          | 6      | 1                 | 70                      | 8                               | 1                                            | 1                                        | 0                | 1.84.E+07          | 1.36.E+07          | 1.14.E+07          | 1.55.E+07          | 1.88.E+07              | 2.43.E+07              | 1.60.E+07              | 1.72.E+07              |
| 2289 | Q9BRP4    | Proteasomal ATPase-associated factor 1 [OS=Homo sapiens]                                  | 5.3           | 3            | 1          | 6      | 1                 | 46                      | 7                               | 1                                            | 1                                        | 0                | 1.21.E+07          | 1.49.E+07          | 1.33.E+07          | 1.45.E+07          | 1.41.E+07              | 1.32.E+07              | 6.67.E+06              | 1.27.E+07              |
| 2290 | P15428-1  | 15-hydroxyprostaglandin dehydrogenase [NAD(+)] [OS=Homo sapiens]                          | 5.3           | 8            | 2          | 15     | 2                 | 22                      | 8                               | 2                                            | 2                                        | 0                | 1.38.E+07          | 1.71.E+07          | 1.44.E+07          | 1.59.E+07          | 1.54.E+07              | 4.19.E+06              | 2.50.E+06              | 2.74.E+06              |
| 2291 | Q03001-7  | dystonin [OS=Homo sapiens]                                                                | 5.3           | 0            | 2          | 6      | 2                 | 0                       | 2                               | 2                                            | 2                                        | 0                | 2.58.E+06          |                    |                    | 2.35.E+06          |                        |                        |                        |                        |
| 2292 | Q9HAV7    | GrpE protein homolog 1, mitochondrial [OS=Homo sapiens]                                   | 5.3           | 9            | 2          | 25     | 2                 | 67                      | 29                              | 2                                            | 2                                        | 0                | 7.77.E+07          | 7.25.E+07          | 8.72.E+07          | 8.10.E+07          | 7.52.E+07              | 6.43.E+07              | 7.71.E+07              | 6.31.E+07              |
| 2293 | Q16513    | Serine/threonine-protein kinase N2 [OS=Homo sapiens]                                      | 5.2           | 3            | 1          | 6      | 1                 | 56                      | 8                               | 1                                            | 1                                        | 0                | 7.32.E+06          | 5.73.E+06          | 4.82.E+06          | 4.40.E+06          | 4.75.E+06              | 7.40.E+06              | 7.63.E+06              | 7.34.E+06              |
| 2294 | O94855    | Protein transport protein Sec24D [OS=Homo sapiens]                                        | 5.2           | 2            | 2          | 7      | 1                 | 17                      | 5                               | 2                                            | 2                                        | 0                | 1.52.E+07          | 1.35.E+07          | 1.42.E+07          | 1.99.E+07          | 1.89.E+07              | 1.99.E+07              | 1.67.E+07              | 2.00.E+07              |
| 2295 | Q9C0E8-1  | Protein lunapark [OS=Homo sapiens]                                                        | 5.2           | 3            | 1          | 2      | 1                 | 30                      | 3                               | 1                                            | 1                                        | 0                |                    |                    | 8.59.E+06          | 7.55.E+06          | 1.46.E+07              |                        | 1.31.E+07              | 1.43.E+07              |
| 2296 | O76031    | ATP-dependent Clp protease ATP-binding subunit clpX-like, mitochondrial [OS=Homo sapiens] | 5.2           | 2            | 1          | 16     | 1                 | 0                       | 0                               | 1                                            | 1                                        | 0                | 9.96.E+06          | 1.11.E+07          | 1.76.E+07          | 1.07.E+07          | 1.68.E+07              | 1.19.E+07              | 1.58.E+07              | 1.34.E+07              |
| 2297 | Q9BQ61    | Uncharacterized protein C19orf43 [OS=Homo sapiens]                                        | 5.2           | 15           | 1          | 12     | 1                 | 22                      | 0                               | 1                                            | 1                                        | 0                | 9.72.E+06          | 8.25.E+06          | 7.10.E+06          | 9.96.E+06          | 1.45.E+07              | 1.36.E+07              | 1.28.E+07              | 1.36.E+07              |
| 2298 | P14406    | Cytochrome c oxidase subunit 7A2, mitochondrial [OS=Homo sapiens]                         | 5.2           | 12           | 1          | 10     | 1                 | 175                     | 11                              | 1                                            | 1                                        | 0                | 9.49.E+07          | 9.43.E+07          | 1.01.E+08          | 8.25.E+07          | 7.55.E+07              | 7.78.E+07              | 8.40.E+07              | 7.17.E+07              |
| 2299 | P50148    | Guanine nucleotide-binding protein G(Q) subunit alpha [OS=Homo sapiens]                   | 5.2           | 6            | 1          | 2      | 1                 | 19                      | 3                               | 1                                            | 1                                        | 0                |                    |                    |                    | 5.62.E+06          |                        |                        |                        |                        |
| 2300 | Q9Y606    | tRNA pseudouridine synthase A, mitochondrial [OS=Homo sapiens]                            | 5.1           | 3            | 1          | 4      | 1                 | 53                      | 4                               | 1                                            | 1                                        | 0                |                    | 5.67.E+06          | 4.38.E+06          | 7.02.E+06          | 9.47.E+06              | 9.34.E+06              | 1.03.E+07              | 9.18.E+06              |
| 2301 | Q9Y6G3    | MKI67 FHA domain-interacting nucleolar phosphoprotein [OS=Homo sapiens]                   | 5.1           | 6            | 1          | 8      | 1                 | 35                      | 9                               | 1                                            | 1                                        | 0                | 1.00.E+07          | 1.18.E+07          | 1.05.E+07          | 1.12.E+07          | 1.20.E+07              | 1.46.E+07              | 1.32.E+07              | 1.22.E+07              |
| 2302 | Q9UH99    | SUN domain-containing protein 2 [OS=Homo sapiens]                                         | 5.1           | 3            | 1          | 6      | 1                 | 51                      | 2                               | 1                                            | 1                                        | 0                | 7.13.E+06          | 7.75.E+06          | 7.14.E+06          | 8.48.E+06          | 1.01.E+07              | 9.07.E+06              | 8.67.E+06              | 8.26.E+06              |
| 2303 | Q00613    | heat shock factor protein 1 [OS=Homo sapiens]                                             | 5.1           | 3            | 1          | 4      | 1                 | 72                      | 0                               | 1                                            | 1                                        | 0                | 2.33.E+06          | 2.69.E+06          | 1.76.E+06          | 2.50.E+06          | 1.64.E+06              | 1.18.E+06              | 1.47.E+06              |                        |
| 2304 | Q9H788    | SH2 domain-containing protein 4A [OS=Homo sapiens]                                        | 5.1           | 4            | 1          | 12     | 1                 | 13                      | 2                               | 1                                            | 1                                        | 0                | 6.49.E+06          | 6.44.E+06          | 6.68.E+06          | 6.40.E+06          | 1.41.E+07              | 1.35.E+07              | 1.12.E+07              | 1.29.E+07              |
| 2305 | Q29RF7-1  | Sister chromatid cohesion protein PDS5 homolog A [OS=Homo sapiens]                        | 5.1           | 2            | 2          | 55     | 2                 | 247                     | 3                               | 1                                            | 2                                        | 0                | 1.16.E+07          | 9.90.E+06          | 1.01.E+07          | 1.05.E+07          | 1.37.E+07              | 1.21.E+07              | 1.35.E+07              | 1.45.E+07              |
| 2306 | Q9UEW8    | STE20/SPS1-related proline-alanine-rich protein kinase [OS=Homo sapiens]                  | 5.1           | 5            | 1          | 10     | 1                 | 79                      | 4                               | 1                                            | 1                                        | 0                | 3.91.E+06          | 5.61.E+06          | 4.72.E+06          | 8.55.E+06          | 9.14.E+06              | 9.06.E+06              | 6.96.E+06              | 8.14.E+06              |
| 2307 | Q96TC7    | Regulator of microtubule dynamics protein 3 [OS=Homo sapiens]                             | 5.1           | 5            | 1          | 2      | 1                 | 62                      | 3                               | 1                                            | 1                                        | 0                | 3.73.E+06          | 1.58.E+06          | 1.12.E+05          | 3.46.E+06          | 1.63.E+05              |                        | 2.33.E+06              | 7.01.E+06              |
| 2308 | P42356    | phosphatidylinositol 4-kinase alpha [OS=Homo sapiens]                                     | 5.1           | 2            | 3          | 36     | 3                 | 67                      | 0                               | 3                                            | 3                                        | 0                | 3.32.E+07          | 3.22.E+07          | 3.36.E+07          | 2.84.E+07          | 3.20.E+07              | 3.24.E+07              | 3.17.E+07              | 3.26.E+07              |
| 2309 | Q9BSC4-1  | Nucleolar protein 10 [OS=Homo sapiens]                                                    | 5.1           | 2            | 1          | 10     | 1                 | 87                      | 9                               | 1                                            | 1                                        | 0                | 4.99.E+06          | 5.00.E+06          | 4.47.E+06          | 6.23.E+06          | 9.15.E+06              | 8.85.E+06              | 4.89.E+06              | 9.09.E+06              |
| 2310 | O95674-1  | phosphatidate cytidyltransferase 2 [OS=Homo sapiens]                                      | 5.0           | 5            | 1          | 7      | 1                 | 0                       | 8                               | 1                                            | 1                                        | 0                | 6.69.E+06          | 6.59.E+06          | 6.39.E+06          | 6.73.E+06          | 1.01.E+07              | 9.39.E+06              | 8.90.E+06              | 9.71.E+06              |
| 2311 | Q9BYD1    | 39S ribosomal protein L13, mitochondrial [OS=Homo sapiens]                                | 5.0           | 13           | 2          | 19     | 2                 | 28                      | 3                               | 2                                            | 2                                        | 0                | 3.55.E+07          | 3.55.E+07          | 3.57.E+07          | 3.60.E+07          | 3.84.E+07              | 3.28.E+07              | 3.63.E+07              | 3.85.E+07              |
| 2312 | Q9Y376    | Calcium-binding protein 39 [OS=Homo sapiens]                                              | 5.0           | 3            | 1          | 13     | 1                 | 21                      | 9                               | 1                                            | 1                                        | 0                | 1.27.E+08          | 1.06.E+08          | 1.20.E+08          | 1.11.E+08          | 5.65.E+07              | 1.32.E+08              | 8.10.E+07              | 8.11.E+07              |
| 2313 | Q9BTD8-1  | RNA-binding protein 42 [OS=Homo sapiens]                                                  | 5.0           | 4            | 1          | 12     | 1                 | 19                      | 12                              | 1                                            | 0                                        | 2.57.E+07        | 2.63.E+07          | 2.10.E+07          | 3.07.E+07          | 2.98.E+07          | 3.28.E+07              | 1.76.E+07              |                        |                        |
| 2314 | Q9Y614-1  | Ubiquitin carboxyl-terminal hydrolase 3 [OS=Homo sapiens]                                 | 5.0           | 3            | 1          | 28     | 1                 | 377                     | 11                              | 1                                            | 1                                        | 0                | 3.72.E+06          | 1.05.E+07          | 9.78.E+06          | 1.29.E+07          | 2.12.E+07              | 2.46.E+07              | 2.02.E+07              | 2.35.E+07              |
| 2315 | Q99598    | Translin-associated protein X [OS=Homo sapiens]                                           | 4.9           | 7            | 1          | 10     | 1                 | 14                      | 7                               | 1                                            | 1                                        | 0                |                    |                    |                    |                    |                        |                        |                        |                        |
| 2316 | P20962    | Parathyromin [OS=Homo sapiens]                                                            | 4.9           | 11           | 1          | 10     | 1                 | 23                      | 10                              | 1                                            | 1                                        | 0                | 1.16.E+08          | 1.07.E+08          | 1.15.E+08          | 1.38.E+08          | 1.10.E+08              | 1.11.E+08              | 1.26.E+08              | 1.12.E+08              |
| 2317 | Q96GQ7    | Probable ATP-dependent RNA helicase DDX27 [OS=Homo sapiens]                               | 4.9           | 1            | 1          | 14     | 1                 | 196                     | 17                              | 1                                            | 1                                        | 0                | 2.84.E+07          | 3.12.E+07          | 2.58.E+07          | 2.53.E+07          | 2.69.E+07              | 3.23.E+07              | 2.76.E+07              | 2.72.E+07              |
| 2318 | P80404    | 4-aminobutyrate aminotransferase, mitochondrial [OS=Homo sapiens]                         | 4.9           | 2            | 1          | 2      | 1                 | 34                      | 2                               | 1                                            | 1                                        | 0                | 2.13.E+06          | 2.41.E+06          |                    | 4.15.E+06          | 1.68.E+06              | 3.06.E+06              | 1.96.E+06              | 2.62.E+06              |
| 2319 | Q9UQ88-1  | Cyclin-dependent kinase 11A [OS=Homo sapiens]                                             | 4.9           | 1            | 1          | 10     | 1                 | 63                      | 5                               | 1                                            | 1                                        | 0                | 7.23.E+06          | 7.03.E+06          | 7.51.E+06          | 6.42.E+06          | 1.20.E+07              | 1.06.E+07              | 9.28.E+06              | 1.10.E+07              |
| 2320 | Q9UHD2    | Serine/threonine-protein kinase TBK1 [OS=Homo sapiens]                                    | 4.9           | 4            | 2          | 31     | 2                 | 28                      | 7                               | 2                                            | 2                                        | 0                |                    |                    |                    |                    |                        |                        |                        |                        |
| 2321 | P33981    | Dual specificity protein kinase TTK [OS=Homo sapiens]                                     | 4.9           | 2            | 1          | 2      | 1                 | 33                      | 0                               | 1                                            | 1                                        | 0                | 2.75.E+06          | 3.20.E+06          | 2.88.E+06          | 3.41.E+06          | 3.10.E+06              | 2.11.E+06              | 2.75.E+06              | 2.80.E+06              |
| 2322 | P42345    | Serine/threonine-protein kinase mTOR [OS=Homo sapiens]                                    | 4.9           | 2            | 2          | 4      | 2                 | 21                      | 0                               | 2                                            | 2                                        | 0                | 1.06.E+07          | 1.29.E+07          | 1.28.E+07          | 8.61.E+06          | 1.15.E+06              | 6.71.E+06              | 3.17.E+06              | 1.33.E+07              |
| 2323 | Q53EU6    | Glycerol-3-phosphate acyltransferase 3 [OS=Homo sapiens]                                  | 4.9           | 3            | 1          | 22     | 1                 | 50                      | 19                              | 1                                            | 1                                        | 0                | 8.04.E+07          | 8.03.E+07          | 7.81.E+07          | 8.72.E+07          | 5.27.E+07              | 5.99.E+07              | 5.30.E+07              | 4.05.E+07              |
| 2324 | Q15054    | DNA polymerase delta subunit 3 [OS=Homo sapiens]                                          | 4.9           | 3            | 1          | 10     | 1                 | 103                     | 10                              | 1                                            | 1                                        | 0                | 7.61.E+06          | 7.92.E+06          | 8.69.E+06          | 8.91.E+06          | 9.75.E+06              | 7.87.E+06              | 1.03.E+07              | 9.16.E+06              |
| 2325 | O95218-1  | Zinc finger Ran-binding domain-containing protein 2 [OS=Homo sapiens]                     | 4.9           | 3            | 1          | 12     | 1                 | 42                      | 5                               | 1                                            | 1                                        | 0                | 2.46.E+07          | 2.59.E+07          | 2.50.E+07          | 2.12.E+07          | 2.11.E+07              | 2.25.E+07              | 2.09.E+07              | 2.09.E+07              |
| 2326 | P49841-1  | Glycogen synthase kinase-3 beta [OS=Homo sapiens]                                         | 4.9           | 7            | 1          | 6      | 1                 | 55                      | 4                               | 1                                            | 1                                        | 0                |                    |                    | 8.18.E+06          | 9.86.E+05          | 1.18.E+07              | 1.21.E+07              | 9.58.E+06              | 1.18.E+07              |
| 2327 | Q96GC5-1  | 39S ribosomal protein L48, mitochondrial [OS=Homo sapiens]                                | 4.9           | 6            | 1          | 2      | 1                 | 19                      | 3                               | 1                                            | 1                                        | 0                |                    | 3.36.E+07          |                    |                    |                        |                        |                        |                        |
| 2328 | Q13505-1  | Metaxin-1 [OS=Homo sapiens]                                                               | 4.9           | 3            | 1          | 11     | 1                 |                         | 9                               | 1                                            |                                          | 0                | 1.53.E+07          | 9.57.E+06          | 1.06.E+07          | 8.24.E+06          | 9.75.E+06              | 1.06.E+07              | 9.55.E+06              | 9.17.E+06              |
| 2329 | O95831-1  | Apoptosis-inducing factor 1, mitochondrial [OS=Homo sapiens]                              | 4.9           | 2            | 1          | 14     | 1                 | 54                      | 16                              | 1                                            | 1                                        | 0                | 2.26.E+07          | 2.38.E+07          | 2.37.E+07          | 2.69.E+07          | 2.74.E+07              | 2.72.E+07              | 1.97.E+07              | 3.01.E+07              |
| 2330 | Q9Y4X5    | E3 ubiquitin-protein ligase ARIH1 [OS=Homo sapiens]                                       | 4.9           | 2            | 1          | 6      | 1                 | 18                      | 0                               | 1                                            | 1                                        | 0                | 1.17.E+07          | 8.83.E+06          | 1.07.E+07          | 7.61.E+06          | 8.16.E+06              | 8.84.E+06              | 1.13.E+07              | 1.17.E+07              |
| 2331 | Q9H0Q0    | Protein FAM49A [OS=Homo sapiens]                                                          | 4.9           | 4            | 1          | 4      | 1                 | 37                      | 2                               | 1                                            | 1                                        | 0                |                    |                    |                    |                    |                        |                        |                        |                        |
| 2332 | Q9GZL7    | ribosome biogenesis protein WDR12 [OS=Homo sapiens]                                       | 4.9           | 6            | 1          | 2      | 1                 | 23                      | 2                               | 1                                            | 1                                        | 0                | 3.81.E+06          | 3.64.E+06          | 2.38.E+07          | 3.36.E+06          | 6.33.E+06              | 9.21.E+06              | 4.02.E+06              | 9.70.E+06              |
| 2333 | O75955    | Flotillin-1 [OS=Homo sapiens]                                                             | 4.9           | 3            | 1          | 12     | 1                 | 85                      | 16                              | 1                                            | 1                                        | 0                | 2.09.E+07          | 2.64.E+07          | 2.25.E+07          | 2.34.E+07          | 3.58.E+07              | 3.73.E+07              | 3.70.E+07              | 3.76.E+07              |
| 2334 | Q9BRJ6    | Uncharacterized protein C7orf50 [OS=Homo sapiens]                                         | 4.8           | 7            | 1          | 4      | 1                 | 44                      | 4                               | 1                                            | 1                                        | 0                | 9.75.E+06          | 1.01.E+07          | 8.94.E+06          | 1.14.E+07          | 1.10.E+07              | 1.14.E+07              | 9.65.E+06              | 1.08.E+07              |

| No.  | Accession | Description                                                                         | Sum PEP Score | Coverage [%] | # Peptides | # PSMs | # Unique Peptides | Score Mascot: A5 Mascot | Score Sequest HT: A2 Sequest HT | # Peptides (by Search Engine): A2 Sequest HT | # Peptides (by Search Engine): A5 Mascot | # Razor Peptides | ctrl Abundance_s_1 | ctrl Abundance_s_2 | ctrl Abundance_s_3 | ctrl Abundance_s_4 | JAM-A KO Abundance_s_1 | JAM-A KO Abundance_s_2 | JAM-A KO Abundance_s_3 | JAM-A KO Abundance_s_4 |
|------|-----------|-------------------------------------------------------------------------------------|---------------|--------------|------------|--------|-------------------|-------------------------|---------------------------------|----------------------------------------------|------------------------------------------|------------------|--------------------|--------------------|--------------------|--------------------|------------------------|------------------------|------------------------|------------------------|
| 2335 | Q9H2H8-1  | peptidyl-prolyl cis-trans isomerase-like 3 [OS=Homo sapiens]                        | 4.8           | 7            | 1          | 6      | 1                 | 48                      | 4                               | 1                                            | 1                                        | 0                | 6.80.E+06          | 6.75.E+06          | 7.41.E+06          | 5.13.E+06          | 8.89.E+06              | 1.00.E+07              | 1.01.E+07              | 5.97.E+06              |
| 2336 | Q9NP92    | 39S ribosomal protein S30, mitochondrial [OS=Homo sapiens]                          | 4.8           | 7            | 2          | 8      | 2                 | 0                       | 6                               | 2                                            | 2                                        | 0                | 2.30.E+07          | 2.11.E+07          | 2.10.E+07          | 2.15.E+07          | 2.11.E+07              | 1.93.E+07              | 1.57.E+07              | 1.95.E+07              |
| 2337 | Q8TED0    | U3 small nucleolar RNA-associated protein 15 homolog [OS=Homo sapiens]              | 4.8           | 6            | 1          | 2      | 1                 | 24                      | 0                               | 1                                            | 1                                        | 0                | 1.13.E+07          | 2.55.E+06          | 1.18.E+07          | 1.19.E+07          | 1.34.E+06              | 1.26.E+07              | 1.06.E+07              |                        |
| 2338 | Q7LGA3-1  | Heparan sulfate 2-O-sulfotransferase 1 [OS=Homo sapiens]                            | 4.8           | 5            | 1          | 2      | 1                 | 41                      | 2                               | 1                                            | 1                                        | 0                | 9.30.E+05          | 1.61.E+06          | 1.13.E+06          | 5.03.E+05          | 3.77.E+06              | 4.27.E+06              | 2.54.E+06              | 3.25.E+06              |
| 2339 | Q7Z4H8    | KDEL motif-containing protein 2 [OS=Homo sapiens]                                   | 4.8           | 2            | 1          | 4      | 1                 | 0                       | 2                               | 1                                            | 1                                        | 0                | 9.46.E+06          | 1.90.E+07          | 9.45.E+06          | 1.71.E+07          | 1.76.E+07              | 3.39.E+07              | 2.06.E+07              | 3.07.E+07              |
| 2340 | Q9NXF1    | Testis-expressed protein 10 [OS=Homo sapiens]                                       | 4.8           | 3            | 2          | 4      | 2                 | 26                      | 0                               | 2                                            | 2                                        | 0                | 3.87.E+06          | 4.69.E+06          | 1.69.E+06          | 3.14.E+06          | 1.68.E+07              | 1.55.E+07              | 1.36.E+07              | 1.52.E+07              |
| 2341 | P51452    | dual specificity protein phosphatase 3 [OS=Homo sapiens]                            | 4.8           | 8            | 1          | 2      | 1                 | 35                      | 2                               | 1                                            | 1                                        | 0                | 2.31.E+07          | 2.64.E+07          | 2.88.E+07          | 2.39.E+07          | 5.49.E+07              | 5.25.E+07              | 5.54.E+07              | 5.54.E+07              |
| 2342 | Q96S44    | TP53-regulating kinase [OS=Homo sapiens]                                            | 4.8           | 8            | 1          | 2      | 1                 | 35                      | 2                               | 1                                            | 1                                        | 0                | 7.36.E+06          | 7.50.E+06          | 7.43.E+06          | 1.12.E+07          | 7.84.E+06              | 6.69.E+06              | 5.91.E+06              | 5.64.E+06              |
| 2343 | Q14197    | Peptidyl-tRNA hydrolase ICT1, mitochondrial [OS=Homo sapiens]                       | 4.8           | 7            | 1          | 12     | 1                 | 102                     | 18                              | 1                                            | 1                                        | 0                | 2.26.E+07          | 2.55.E+07          | 2.47.E+07          | 2.15.E+07          | 2.32.E+07              | 2.18.E+07              | 2.33.E+07              | 2.55.E+07              |
| 2344 | Q9Y315    | deoxyribose-phosphate aldolase [OS=Homo sapiens]                                    | 4.8           | 7            | 1          | 20     | 1                 | 52                      | 25                              | 1                                            | 1                                        | 0                | 1.58.E+07          | 1.63.E+07          | 1.61.E+07          | 9.94.E+06          | 1.64.E+07              | 1.62.E+07              | 1.30.E+07              | 1.41.E+07              |
| 2345 | O75792    | Ribonuclease H2 subunit A [OS=Homo sapiens]                                         | 4.8           | 5            | 1          | 4      | 1                 | 20                      | 4                               | 1                                            | 1                                        | 0                | 1.03.E+07          | 5.94.E+06          | 7.63.E+06          | 1.10.E+07          | 9.67.E+06              | 8.70.E+06              | 1.12.E+07              |                        |
| 2346 | P54802    | alpha-N-acetylglucosaminidase [OS=Homo sapiens]                                     | 4.8           | 2            | 1          | 4      | 1                 | 51                      | 5                               | 1                                            | 1                                        | 0                | 4.45.E+06          | 4.39.E+06          | 3.89.E+06          | 4.97.E+06          | 6.58.E+06              | 7.11.E+06              | 6.74.E+06              | 7.38.E+06              |
| 2347 | Q9UHR5-1  | SAP30-binding protein [OS=Homo sapiens]                                             | 4.7           | 5            | 1          | 2      | 1                 | 36                      | 2                               | 1                                            | 1                                        | 0                |                    |                    |                    |                    |                        |                        |                        |                        |
| 2348 | Q14919-1  | Dr1-associated corepressor [OS=Homo sapiens]                                        | 4.7           | 6            | 2          | 16     | 2                 | 28                      | 0                               | 2                                            | 2                                        | 0                | 6.82.E+05          | 4.92.E+06          | 5.36.E+06          | 4.55.E+06          |                        |                        |                        |                        |
| 2349 | Q99615-1  | DnaJ homolog subfamily C member 7 [OS=Homo sapiens]                                 | 4.7           | 2            | 1          | 10     | 1                 | 68                      | 12                              | 1                                            | 1                                        | 0                | 2.51.E+07          | 2.98.E+07          | 2.60.E+07          | 2.93.E+07          | 4.34.E+07              | 4.00.E+07              | 3.85.E+07              | 4.33.E+07              |
| 2350 | P15151-1  | Poliovirus receptor [OS=Homo sapiens]                                               | 4.7           | 5            | 2          | 18     | 2                 | 39                      | 22                              | 2                                            | 2                                        | 0                | 3.81.E+07          | 3.67.E+07          | 4.36.E+07          | 4.64.E+07          | 2.38.E+07              | 2.81.E+07              | 2.81.E+07              | 2.76.E+07              |
| 2351 | A4D1E9-1  | GTP-binding protein 10 [OS=Homo sapiens]                                            | 4.7           | 7            | 1          | 4      | 1                 | 22                      | 0                               | 1                                            | 1                                        | 0                | 2.93.E+06          | 7.24.E+06          | 6.50.E+06          | 1.25.E+06          | 7.87.E+06              | 8.49.E+06              | 2.68.E+06              | 7.92.E+06              |
| 2352 | O94915-1  | protein furry homolog-like [OS=Homo sapiens]                                        | 4.7           | 1            | 2          | 49     | 2                 | 61                      | 0                               | 1                                            | 2                                        | 0                |                    |                    |                    | 2.20.E+05          | 3.19.E+06              | 2.51.E+06              | 2.48.E+06              | 2.35.E+06              |
| 2353 | Q8NI27-1  | THO complex subunit 2 [OS=Homo sapiens]                                             | 4.7           | 2            | 2          | 12     | 2                 | 20                      | 0                               | 2                                            | 2                                        | 0                | 7.20.E+06          | 7.22.E+06          | 5.93.E+06          | 6.32.E+06          | 1.26.E+07              | 1.12.E+07              | 8.96.E+06              | 1.24.E+07              |
| 2354 | Q9BST9    | Rhotekin [OS=Homo sapiens]                                                          | 4.7           | 3            | 1          | 2      | 1                 | 21                      | 3                               | 1                                            | 1                                        | 0                |                    |                    |                    |                    |                        |                        |                        |                        |
| 2355 | Q96Q11-1  | CCA tRNA nucleotidyltransferase 1, mitochondrial [OS=Homo sapiens]                  | 4.7           | 4            | 1          | 10     | 1                 | 36                      | 0                               | 1                                            | 1                                        | 0                | 4.75.E+06          | 7.40.E+06          | 3.95.E+06          | 7.92.E+06          | 8.32.E+06              | 7.87.E+06              | 7.37.E+06              | 8.77.E+06              |
| 2356 | Q96G21    | U3 small nucleolar ribonucleoprotein protein IMP4 [OS=Homo sapiens]                 | 4.7           | 3            | 1          | 12     | 1                 | 54                      | 2                               | 1                                            | 1                                        | 0                | 4.09.E+06          | 4.31.E+06          | 4.70.E+06          | 3.87.E+06          | 2.93.E+06              | 3.29.E+06              | 3.34.E+06              | 3.01.E+06              |
| 2357 | Q95049-1  | Tight junction protein ZO-3 [OS=Homo sapiens]                                       | 4.7           | 2            | 2          | 9      | 2                 | 71                      | 0                               | 1                                            | 2                                        | 0                | 9.31.E+06          | 8.75.E+06          | 1.01.E+07          | 7.85.E+06          | 8.97.E+06              | 9.97.E+06              | 7.16.E+06              | 9.45.E+06              |
| 2358 | Q9NVU7    | Protein SDA1 homolog [OS=Homo sapiens]                                              | 4.6           | 4            | 2          | 3      | 2                 | 33                      | 3                               | 1                                            | 2                                        | 0                |                    |                    |                    |                    |                        |                        |                        |                        |
| 2359 | Q9UGJ1    | gamma-tubulin complex component 4 [OS=Homo sapiens]                                 | 4.6           | 3            | 1          | 8      | 1                 | 26                      | 0                               | 1                                            | 1                                        | 0                | 5.54.E+06          | 8.03.E+06          | 5.14.E+06          | 7.53.E+06          | 6.01.E+06              | 3.59.E+06              | 4.40.E+06              | 5.09.E+06              |
| 2360 | Q13308-1  | Inactive tyrosine-protein kinase 7 [OS=Homo sapiens]                                | 4.6           | 1            | 1          | 8      | 1                 | 29                      | 8                               | 1                                            | 1                                        | 0                | 8.02.E+06          | 6.45.E+06          | 9.24.E+06          | 7.36.E+06          | 1.50.E+07              | 1.35.E+07              | 1.67.E+07              | 1.64.E+07              |
| 2361 | Q9H1E3    | Nuclear ubiquitous casein and cyclin-dependent kinase substrate 1 [OS=Homo sapiens] | 4.6           | 12           | 2          | 49     | 2                 | 90                      | 11                              | 2                                            | 2                                        | 0                | 8.82.E+06          | 7.99.E+06          | 9.09.E+06          | 6.91.E+06          | 7.04.E+06              | 8.01.E+06              | 8.86.E+06              | 7.26.E+06              |
| 2362 | Q07817-1  | bcl-2-like protein 1 [OS=Homo sapiens]                                              | 4.6           | 4            | 1          | 16     | 1                 | 138                     | 17                              | 1                                            | 1                                        | 0                | 9.93.E+06          | 1.08.E+07          | 9.42.E+06          | 1.13.E+07          | 9.84.E+06              | 7.85.E+06              | 1.90.E+06              | 7.73.E+06              |
| 2363 | P49407-1  | Beta-arrestin-1 [OS=Homo sapiens]                                                   | 4.6           | 10           | 2          | 5      | 2                 | 20                      | 0                               | 2                                            | 2                                        | 0                | 1.35.E+07          | 1.51.E+07          | 3.30.E+06          | 3.92.E+06          | 2.38.E+07              | 2.13.E+06              | 1.47.E+07              | 2.30.E+06              |
| 2364 | Q9NVP2    | Histone chaperone ASF1B [OS=Homo sapiens]                                           | 4.6           | 10           | 1          | 14     | 1                 | 22                      | 7                               | 1                                            | 1                                        | 0                | 1.30.E+07          | 1.38.E+07          | 1.24.E+07          | 2.06.E+07          | 1.10.E+07              | 1.20.E+07              | 1.06.E+07              | 1.22.E+07              |
| 2365 | Q9UKS6    | Protein kinase C and casein kinase substrate in neurons protein 3 [OS=Homo sapiens] | 4.6           | 5            | 2          | 10     | 2                 | 0                       | 4                               | 2                                            | 2                                        | 0                | 3.58.E+07          | 3.79.E+07          | 3.23.E+07          | 3.40.E+07          | 2.61.E+07              | 2.64.E+07              | 2.75.E+07              | 2.86.E+07              |
| 2366 | A0AV96    | RNA-binding protein 47 [OS=Homo sapiens]                                            | 4.6           | 2            | 1          | 4      | 1                 | 20                      | 2                               | 1                                            | 1                                        | 0                | 1.10.E+07          | 1.09.E+07          | 1.04.E+07          | 1.39.E+07          | 1.40.E+07              | 1.25.E+07              | 1.34.E+07              | 1.36.E+07              |
| 2367 | Q9BRT3    | migration and invasion enhancer 1 [OS=Homo sapiens]                                 | 4.6           | 10           | 1          | 23     | 1                 | 13                      | 23                              | 1                                            | 1                                        | 0                | 3.57.E+07          | 3.14.E+07          | 3.26.E+07          | 3.07.E+07          | 5.62.E+07              | 5.77.E+07              | 6.07.E+07              | 6.02.E+07              |
| 2368 | Q7KZ85    | transcription elongation factor spt6 [OS=Homo sapiens]                              | 4.6           | 2            | 2          | 22     | 2                 | 19                      | 0                               | 1                                            | 2                                        | 0                | 1.67.E+07          | 1.07.E+07          | 1.79.E+07          | 2.18.E+07          | 1.43.E+07              | 1.52.E+07              | 1.73.E+07              | 1.56.E+07              |
| 2369 | Q9Y3E0    | vesicle transport protein GOT1B [OS=Homo sapiens]                                   | 4.6           | 11           | 1          | 14     | 1                 | 98                      | 22                              | 1                                            | 1                                        | 0                | 1.17.E+07          | 7.56.E+06          | 6.76.E+06          | 1.55.E+07          | 1.74.E+07              | 1.89.E+07              | 1.89.E+07              | 2.23.E+07              |
| 2370 | Q9BUL9    | Ribonuclease P protein subunit p25 [OS=Homo sapiens]                                | 4.5           | 6            | 1          | 17     | 1                 | 35                      | 2                               | 1                                            | 1                                        | 0                | 1.70.E+07          | 1.67.E+07          | 1.70.E+07          | 1.66.E+07          | 2.05.E+07              | 2.08.E+07              | 1.87.E+06              | 2.29.E+07              |
| 2371 | Q8NC56-1  | LEM domain-containing protein 2 [OS=Homo sapiens]                                   | 4.5           | 3            | 1          | 2      | 1                 | 25                      | 2                               | 1                                            | 1                                        | 0                |                    |                    |                    |                    |                        |                        |                        |                        |
| 2372 | P02765    | Alpha-2-HS-glycoprotein [OS=Homo sapiens]                                           | 4.5           | 4            | 2          | 7      | 2                 | 0                       | 0                               | 2                                            | 0                                        | 0                | 2.72.E+05          | 4.01.E+05          | 3.71.E+05          | 3.60.E+05          | 1.29.E+06              | 3.66.E+05              | 1.15.E+06              | 1.45.E+06              |
| 2373 | O43760    | Synaptogyrin-2 [OS=Homo sapiens]                                                    | 4.5           | 8            | 2          | 29     | 2                 | 73                      | 22                              | 2                                            | 2                                        | 0                | 5.07.E+07          | 4.56.E+07          | 5.24.E+07          | 5.44.E+07          | 2.78.E+07              | 2.53.E+07              | 2.93.E+07              | 2.40.E+07              |
| 2374 | O96000    | NADH dehydrogenase [ubiquinone] 1 beta subcomplex subunit 10 [OS=Homo sapiens]      | 4.5           | 8            | 1          | 28     | 1                 | 41                      | 37                              | 1                                            | 1                                        | 0                | 1.59.E+08          | 1.76.E+08          | 1.52.E+08          | 1.50.E+08          | 2.21.E+08              | 2.36.E+08              | 2.13.E+08              | 2.20.E+08              |
| 2375 | P46976-1  | Glycogenin-1 [OS=Homo sapiens]                                                      | 4.5           | 6            | 2          | 8      | 2                 | 24                      | 2                               | 2                                            | 2                                        | 0                | 2.48.E+07          | 2.22.E+07          | 2.43.E+07          | 2.76.E+07          | 2.17.E+07              | 2.12.E+07              | 2.51.E+07              | 2.26.E+07              |
| 2376 | O14965    | Aurora kinase A [OS=Homo sapiens]                                                   | 4.5           | 3            | 1          | 8      | 1                 | 34                      | 4                               | 1                                            | 1                                        | 0                |                    |                    |                    |                    |                        |                        |                        |                        |
| 2377 | Q9C0A0-1  | Contactin-associated protein-like 4 [OS=Homo sapiens]                               | 4.5           | 1            | 2          | 23     | 1                 | 68                      | 2                               | 1                                            | 2                                        | 0                | 7.18.E+06          | 6.80.E+06          | 9.14.E+06          | 9.05.E+06          | 1.33.E+07              | 1.28.E+07              | 1.66.E+07              | 1.35.E+07              |
| 2378 | Q9Y3D9    | 28S ribosomal protein S23, mitochondrial [OS=Homo sapiens]                          | 4.5           | 5            | 1          | 20     | 1                 | 114                     | 23                              | 1                                            | 1                                        | 0                | 3.12.E+07          | 2.31.E+07          | 2.23.E+07          | 1.83.E+07          | 1.79.E+07              | 2.42.E+07              | 2.40.E+07              | 2.30.E+07              |
| 2379 | Q92597    | Protein NDRG1 [OS=Homo sapiens]                                                     | 4.5           | 5            | 1          | 10     | 1                 | 23                      | 2                               | 1                                            | 1                                        | 0                | 9.08.E+06          | 9.05.E+06          | 9.73.E+06          | 9.11.E+06          | 1.11.E+07              | 1.04.E+07              | 2.19.E+06              | 1.09.E+07              |
| 2380 | Q9GZP8-1  | Immortalization up-regulated protein [OS=Homo sapiens]                              | 4.5           | 25           | 1          | 4      | 1                 | 17                      | 6                               | 1                                            | 1                                        | 0                | 2.73.E+07          | 2.73.E+07          | 2.46.E+07          | 2.64.E+07          | 1.81.E+07              | 1.61.E+07              | 1.12.E+07              |                        |
| 2381 | Q05682-1  | Caldesmon [OS=Homo sapiens]                                                         | 4.5           | 4            | 2          | 13     | 2                 | 0                       | 2                               | 2                                            | 2                                        | 0                | 4.79.E+06          | 9.94.E+06          | 1.27.E+07          | 1.57.E+07          | 1.57.E+06              | 2.98.E+06              | 1.29.E+06              | 1.44.E+07              |
| 2382 | P82909    | 28S ribosomal protein S36, mitochondrial [OS=Homo sapiens]                          | 4.5           | 16           | 1          | 12     | 1                 | 18                      | 2                               | 1                                            | 1                                        | 0                | 9.80.E+06          | 9.44.E+06          | 9.78.E+06          | 7.82.E+06          | 6.73.E+06              | 7.69.E+06              | 8.06.E+06              | 7.24.E+06              |
| 2383 | P62310    | U6 snRNA-associated Sm-like protein Lsm3 [OS=Homo sapiens]                          | 4.4           | 12           | 1          | 50     | 1                 | 281                     | 66                              | 1                                            | 1                                        | 0                | 5.84.E+07          | 5.89.E+07          | 5.82.E+07          | 5.08.E+07          | 6.52.E+07              | 6.53.E+07              | 6.80.E+07              | 6.72.E+07              |
| 2384 | P13473-1  | Lysosome-associated membrane glycoprotein 2 [OS=Homo sapiens]                       | 4.4           | 2            | 1          | 10     | 1                 | 130                     | 11                              | 1                                            | 1                                        | 0                | 3.56.E+07          | 3.93.E+07          | 3.70.E+07          | 3.36.E+07          | 3.29.E+07              | 3.38.E+07              | 3.43.E+07              | 3.37.E+07              |
| 2385 | Q5K4L6-1  | Long-chain fatty acid transport protein 3 [OS=Homo sapiens]                         | 4.4           | 3            | 1          | 2      | 1                 | 25                      | 2                               | 1                                            | 1                                        | 0                | 1.23.E+07          | 7.02.E+06          | 5.87.E+06          | 5.96.E+06          | 3.54.E+06              | 1.77.E+07              |                        | 4.26.E+06              |
| 2386 | P49356    | protein farnesyltransferase subunit beta [OS=Homo sapiens]                          | 4.4           | 4            | 1          | 2      | 1                 | 42                      | 2                               | 1                                            | 1                                        | 0                | 9.14.E+06          | 5.18.E+06          | 4.62.E+06          | 1.63.E+07          | 1.01.E+07              | 1.31.E+07              | 4.88.E+06              | 1.00.E+07              |
| 2387 | Q8IXH7    | Negative elongation factor C/D [OS=Homo sapiens]                                    | 4.4           | 3            | 1          | 2      | 1                 | 53                      | 0                               | 1                                            | 1                                        | 0                | 2.60.E+06          | 2.84.E+06          | 2.87.E+06          | 4.45.E+06          | 3.21.E+06              | 2.84.E+06              | 3.12.E+06              | 2.31.E+06              |
| 2388 | O7        |                                                                                     |               |              |            |        |                   |                         |                                 |                                              |                                          |                  |                    |                    |                    |                    |                        |                        |                        |                        |

| No.  | Accession | Description                                                                                   | Sum PEP Score | Coverage [%] | # Peptides | # PSMs | # Unique Peptides | Score Mascot: A5 Mascot | Score Sequest HT: A2 Sequest HT | # Peptides (by Search Engine): A2 Sequest HT | # Peptides (by Search Engine): A5 Mascot | # Razor Peptides | ctrl Abundance s_1 | ctrl Abundance s_2 | ctrl Abundance s_3 | ctrl Abundance s_4 | JAM-A KO Abundance s_1 | JAM-A KO Abundance s_2 | JAM-A KO Abundance s_3 | JAM-A KO Abundance s_4 |           |
|------|-----------|-----------------------------------------------------------------------------------------------|---------------|--------------|------------|--------|-------------------|-------------------------|---------------------------------|----------------------------------------------|------------------------------------------|------------------|--------------------|--------------------|--------------------|--------------------|------------------------|------------------------|------------------------|------------------------|-----------|
| 2389 | Q9BV10    | Dol-P-Man:Man(7)GlcNAc(2)-PP-Dol alpha-1,6-mannosyltransferase [OS=Homo sapiens]              | 4.4           | 3            | 1          | 4      | 1                 | 35                      | 2                               | 1                                            | 1                                        | 0                | 2.17.E+06          | 1.72.E+06          | 1.80.E+06          | 2.50.E+06          | 1.48.E+06              |                        |                        | 1.29.E+06              |           |
| 2390 | Q9NZ45    | CDGSH iron-sulfur domain-containing protein 1 [OS=Homo sapiens]                               | 4.4           | 14           | 1          | 22     | 1                 | 31                      | 25                              | 1                                            | 1                                        | 0                | 1.99.E+07          | 2.47.E+07          | 2.65.E+07          | 2.36.E+07          | 3.57.E+07              | 3.83.E+07              | 4.13.E+07              | 3.61.E+07              |           |
| 2391 | Q9NXG2    | THUMP domain-containing protein 1 [OS=Homo sapiens]                                           | 4.4           | 3            | 1          | 4      | 1                 | 16                      | 4                               | 1                                            | 1                                        | 0                | 2.08.E+06          | 2.95.E+06          | 1.95.E+06          | 2.52.E+05          | 6.12.E+06              | 5.49.E+06              | 7.86.E+06              | 8.58.E+06              |           |
| 2392 | Q15714-1  | TSC22 domain family protein 1 [OS=Homo sapiens]                                               | 4.4           | 1            | 1          | 8      | 1                 | 31                      | 10                              | 1                                            | 1                                        | 0                | 2.64.E+07          | 2.49.E+07          | 2.97.E+07          | 3.66.E+07          | 1.25.E+07              |                        |                        |                        |           |
| 2393 | Q7L0Y3    | Mitochondrial ribonuclease P protein 1 [OS=Homo sapiens]                                      | 4.4           | 3            | 1          | 7      | 1                 | 0                       | 2                               | 1                                            | 1                                        | 0                | 8.23.E+06          | 1.09.E+07          | 9.70.E+06          | 1.15.E+07          | 1.04.E+07              | 9.17.E+06              | 9.22.E+06              | 9.95.E+06              |           |
| 2394 | O96019-1  | Actin-like protein 6A [OS=Homo sapiens]                                                       | 4.4           | 2            | 1          | 22     | 1                 | 84                      | 2                               | 1                                            | 1                                        | 0                | 5.91.E+06          | 5.52.E+06          | 6.75.E+06          | 7.57.E+06          | 4.48.E+06              | 4.85.E+06              | 5.78.E+06              | 4.94.E+06              |           |
| 2395 | Q96CD2-1  | phosphopantothenoylcysteine decarboxylase [OS=Homo sapiens]                                   | 4.3           | 8            | 1          | 2      | 1                 | 18                      | 2                               | 1                                            | 1                                        | 0                | 4.53.E+06          | 5.47.E+06          | 4.25.E+06          | 4.60.E+06          | 7.15.E+06              | 7.19.E+06              | 5.89.E+06              | 7.68.E+06              |           |
| 2396 | Q14692    | ribosome biogenesis protein BMS1 homolog [OS=Homo sapiens]                                    | 4.3           | 2            | 1          | 12     | 1                 | 68                      | 5                               | 1                                            | 1                                        | 0                | 1.08.E+07          | 1.17.E+07          | 9.76.E+06          | 1.12.E+07          | 9.48.E+06              | 4.92.E+05              | 8.64.E+06              | 4.18.E+06              |           |
| 2397 | P58511    | Small integral membrane protein 11A [OS=Homo sapiens]                                         | 4.3           | 26           | 1          | 14     | 1                 | 27                      | 2                               | 1                                            | 1                                        | 0                |                    | 5.78.E+06          |                    |                    | 4.49.E+06              |                        | 4.94.E+06              |                        |           |
| 2398 | Q6UWP7-1  | Lysocardiolipin acyltransferase 1 [OS=Homo sapiens]                                           | 4.3           | 2            | 1          | 30     | 1                 | 0                       | 0                               | 1                                            | 0                                        | 0                | 8.26.E+06          | 8.59.E+06          | 9.36.E+06          | 7.54.E+06          | 8.25.E+06              | 7.80.E+06              | 8.51.E+06              | 8.44.E+06              |           |
| 2399 | Q9Y6V7    | Probable ATP-dependent RNA helicase ddx49 [OS=Homo sapiens]                                   | 4.3           | 4            | 1          | 2      | 1                 | 52                      | 2                               | 1                                            | 1                                        | 0                |                    |                    |                    |                    |                        |                        |                        |                        |           |
| 2400 | Q8IZP0    | abl interactor 1 [OS=Homo sapiens]                                                            | 4.3           | 3            | 1          | 2      | 1                 | 50                      |                                 |                                              |                                          | 0                | 7.06.E+06          | 1.10.E+07          | 2.86.E+06          |                    | 8.95.E+06              | 9.22.E+06              | 8.25.E+06              | 1.06.E+07              |           |
| 2401 | Q96KA5-1  | cleft lip and palate transmembrane protein 1-like protein [OS=Homo sapiens]                   | 4.3           | 4            | 1          | 4      | 1                 | 0                       |                                 |                                              |                                          | 0                |                    | 1.78.E+07          | 1.19.E+07          | 1.66.E+07          |                        |                        | 1.28.E+06              | 9.47.E+05              |           |
| 2402 | Q9UBW8    | COP9 signalosome complex subunit 7a [OS=Homo sapiens]                                         | 4.3           | 5            | 1          | 4      | 1                 | 22                      | 5                               | 1                                            | 1                                        | 0                |                    |                    |                    |                    |                        |                        |                        |                        |           |
| 2403 | Q9H6T3    | RNA polymerase II-associated protein 3 [OS=Homo sapiens]                                      | 4.3           | 2            | 1          | 28     | 1                 | 129                     | 6                               | 1                                            | 1                                        | 0                | 4.05.E+06          | 4.33.E+06          | 2.88.E+06          | 4.47.E+06          | 1.29.E+07              | 1.04.E+07              | 8.94.E+06              | 1.08.E+07              |           |
| 2404 | Q2LD37-1  | Uncharacterized protein KIAA1109 [OS=Homo sapiens]                                            | 4.3           | 0            | 1          | 143    | 1                 | 0                       | 0                               | 1                                            | 1                                        | 0                | 1.14.E+07          | 1.04.E+07          | 1.22.E+07          | 1.01.E+07          | 1.65.E+07              | 1.70.E+07              | 1.92.E+07              | 1.83.E+07              |           |
| 2405 | Q96T60    | Bifunctional polynucleotide phosphatase/kinase [OS=Homo sapiens]                              | 4.3           | 2            | 1          | 8      | 1                 | 0                       | 7                               | 1                                            | 1                                        | 0                |                    |                    |                    |                    |                        |                        |                        |                        |           |
| 2406 | P12074    | Cytochrome c oxidase subunit 6A1, mitochondrial [OS=Homo sapiens]                             | 4.3           | 43           | 2          | 10     | 2                 | 0                       | 11                              | 2                                            | 1                                        | 0                | 9.74.E+07          | 1.10.E+08          | 9.59.E+07          | 1.07.E+08          | 1.11.E+08              | 1.11.E+08              | 1.07.E+08              | 1.01.E+08              |           |
| 2407 | Q9H061-1  | Transmembrane protein 126A [OS=Homo sapiens]                                                  | 4.3           | 5            | 1          | 34     | 1                 | 89                      | 33                              | 1                                            | 1                                        | 0                | 1.43.E+07          | 1.85.E+07          | 1.53.E+07          | 2.45.E+07          | 2.11.E+07              | 2.04.E+07              | 1.34.E+07              | 2.37.E+07              |           |
| 2408 | Q9NUW8    | tyrosyl-DNA phosphodiesterase 1 [OS=Homo sapiens]                                             | 4.2           | 2            | 1          | 33     | 1                 | 23                      | 0                               | 1                                            | 1                                        | 0                | 1.91.E+06          | 1.91.E+06          | 2.24.E+06          | 1.39.E+06          | 1.89.E+06              | 2.26.E+06              | 2.44.E+06              | 1.99.E+06              |           |
| 2409 | P36406-1  | E3 ubiquitin-protein ligase TRIM23 [OS=Homo sapiens]                                          | 4.2           | 2            | 1          | 18     | 1                 | 79                      | 21                              | 1                                            | 1                                        | 0                | 3.02.E+07          | 2.79.E+07          | 2.94.E+07          | 2.77.E+07          | 3.03.E+07              | 3.54.E+07              | 3.29.E+06              | 2.93.E+07              |           |
| 2410 | Q5JRX3-2  | Isoform 2 of Presequence protease, mitochondrial [OS=Homo sapiens]                            | 4.2           | 3            | 1          | 2      | 1                 |                         | 0                               | 1                                            | 1                                        | 0                | 5.91.E+06          | 6.34.E+06          | 6.11.E+06          | 6.62.E+06          | 5.68.E+06              | 6.35.E+06              | 5.99.E+06              | 5.86.E+06              |           |
| 2411 | Q6P9B6    | TLD domain-containing protein 1 [OS=Homo sapiens]                                             | 4.2           | 4            | 1          | 2      | 1                 | 35                      | 0                               | 1                                            | 1                                        | 0                | 6.74.E+06          | 6.02.E+06          | 8.02.E+06          | 6.16.E+06          | 7.13.E+06              | 5.30.E+06              | 9.92.E+06              | 6.80.E+06              |           |
| 2412 | Q9BV40    | vesicle-associated membrane protein 8 [OS=Homo sapiens]                                       | 4.2           | 14           | 1          | 24     | 1                 | 16                      | 23                              | 1                                            | 1                                        | 0                | 7.30.E+06          | 1.15.E+07          | 1.08.E+07          | 1.18.E+07          | 9.22.E+06              | 8.23.E+06              | 3.02.E+06              | 1.02.E+07              |           |
| 2413 | Q96B49    | Mitochondrial import receptor subunit TOM6 homolog OS=Homo sapiens OX=9606 GN=TOMM6 PE=1 SV=1 | 4.2           | 38           | 1          | 4      | 1                 | 36                      |                                 |                                              |                                          | 0                | 1.31.E+07          | 1.64.E+07          | 1.27.E+07          | 1.47.E+07          | 1.45.E+07              | 1.52.E+07              | 1.47.E+07              | 2.05.E+07              |           |
| 2414 | P49840    | Glycogen synthase kinase-3 alpha [OS=Homo sapiens]                                            | 4.2           | 3            | 1          | 3      | 1                 | 0                       | 5                               | 1                                            | 1                                        | 0                |                    |                    |                    |                    |                        |                        |                        |                        |           |
| 2415 | Q01581    | hydroxymethylglutaryl-CoA synthase, cytoplasmic [OS=Homo sapiens]                             | 4.2           | 4            | 1          | 6      | 1                 | 15                      | 2                               | 1                                            | 1                                        | 0                | 1.34.E+07          | 2.31.E+07          | 9.97.E+06          | 1.17.E+07          | 2.06.E+07              | 2.94.E+07              | 2.63.E+07              | 2.17.E+07              |           |
| 2416 | Q92947-1  | Glutaryl-CoA dehydrogenase, mitochondrial [OS=Homo sapiens]                                   | 4.2           | 6            | 1          | 2      | 1                 | 16                      | 2                               | 1                                            | 1                                        | 0                | 6.53.E+06          | 3.12.E+06          | 5.22.E+06          | 6.36.E+06          | 5.01.E+05              | 3.48.E+06              | 2.68.E+06              | 2.24.E+06              |           |
| 2417 | P51690    | Arylsulfatase E [OS=Homo sapiens]                                                             | 4.2           | 2            | 1          | 6      | 1                 | 51                      | 2                               | 1                                            | 1                                        | 0                |                    |                    | 1.92.E+05          | 3.22.E+05          | 7.83.E+06              | 6.56.E+06              | 6.66.E+06              | 6.26.E+06              |           |
| 2418 | O75976    | Carboxypeptidase D [OS=Homo sapiens]                                                          | 4.2           | 1            | 1          | 7      | 1                 | 62                      | 0                               | 1                                            | 1                                        | 0                |                    | 9.70.E+06          | 8.06.E+06          | 5.94.E+06          | 1.24.E+07              | 1.01.E+07              | 6.32.E+06              | 8.99.E+06              |           |
| 2419 | P23434    | Glycine cleavage system H protein, mitochondrial [OS=Homo sapiens]                            | 4.1           | 6            | 1          | 32     | 1                 | 19                      | 18                              | 1                                            | 1                                        | 0                | 3.58.E+07          | 4.35.E+07          | 4.22.E+07          | 3.44.E+07          | 4.25.E+07              | 4.15.E+07              | 4.00.E+07              | 3.98.E+07              |           |
| 2420 | Q96A35    | 39S ribosomal protein L24, mitochondrial [OS=Homo sapiens]                                    | 4.1           | 6            | 1          | 6      | 1                 | 0                       | 6                               | 1                                            | 1                                        | 0                |                    |                    |                    |                    |                        |                        |                        | 1.18.E+07              |           |
| 2421 | Q9H5V8-1  | CUB domain-containing protein 1 [OS=Homo sapiens]                                             | 4.1           | 2            | 1          | 2      | 1                 | 13                      | 3                               | 1                                            | 1                                        | 0                | 6.79.E+06          | 6.35.E+06          | 6.17.E+06          | 4.92.E+06          | 7.40.E+06              | 9.26.E+06              | 1.36.E+07              | 5.73.E+06              |           |
| 2422 | Q8TBC4-1  | NEDD8-activating enzyme E1 catalytic subunit [OS=Homo sapiens]                                | 4.1           | 5            | 1          | 14     | 1                 | 0                       | 4                               | 1                                            | 1                                        | 0                | 1.13.E+07          | 1.41.E+07          | 1.32.E+07          | 1.71.E+07          | 1.83.E+07              | 1.82.E+07              | 1.74.E+07              | 1.25.E+07              |           |
| 2423 | Q9H267    | Vacuolar protein sorting-associated protein 33B [OS=Homo sapiens]                             | 4.1           | 2            | 1          | 6      | 1                 | 76                      | 5                               | 1                                            | 1                                        | 0                | 6.82.E+06          | 6.89.E+06          | 4.74.E+06          | 6.41.E+06          | 7.19.E+06              | 4.88.E+06              | 3.62.E+06              | 5.75.E+06              |           |
| 2424 | Q96C23    | aldose 1-epimerase [OS=Homo sapiens]                                                          | 4.1           | 7            | 1          | 8      | 1                 | 89                      | 5                               | 1                                            | 1                                        | 0                | 4.92.E+06          | 7.03.E+06          | 2.98.E+06          | 6.20.E+06          |                        |                        |                        |                        |           |
| 2425 | P09848    | Lactase-phiilorizin hydrolase [OS=Homo sapiens]                                               | 4.1           | 2            | 2          | 6      | 2                 | 0                       | 7                               | 2                                            | 1                                        | 0                | 2.61.E+07          | 3.15.E+07          | 3.69.E+07          | 3.36.E+07          | 4.32.E+07              | 3.79.E+07              | 5.54.E+07              | 3.64.E+07              |           |
| 2426 | Q9BRP8    | Partner of Y14 and mago [OS=Homo sapiens]                                                     | 4.1           | 7            | 1          | 4      | 1                 | 43                      | 4                               | 1                                            | 1                                        | 0                | 1.46.E+07          | 1.07.E+07          | 9.53.E+06          | 1.16.E+07          | 1.45.E+07              | 1.50.E+07              | 1.42.E+07              | 1.23.E+07              |           |
| 2427 | Q96S97    | myeloid-associated differentiation marker [OS=Homo sapiens]                                   | 4.1           | 5            | 2          | 20     | 2                 | 14                      | 0                               | 2                                            | 1                                        | 0                | 4.06.E+07          | 2.37.E+07          | 1.74.E+07          | 2.15.E+07          | 6.71.E+06              |                        | 6.00.E+06              | 1.81.E+07              |           |
| 2428 | P21246    | Pleiotrophin [OS=Homo sapiens]                                                                | 4.1           | 14           | 1          | 2      | 1                 | 19                      | 2                               | 1                                            | 1                                        | 0                |                    |                    |                    |                    |                        |                        |                        |                        |           |
| 2429 | Q96MW1    | Coiled-coil domain-containing protein 43 [OS=Homo sapiens]                                    | 4.0           | 5            | 1          | 4      | 1                 | 23                      | 4                               | 1                                            | 1                                        | 0                |                    | 1.83.E+07          | 1.98.E+07          | 1.69.E+07          | 2.42.E+07              | 2.27.E+07              | 2.74.E+07              | 3.02.E+07              |           |
| 2430 | P35610    | sterol O-acyltransferase 1 [OS=Homo sapiens]                                                  | 4.0           | 3            | 1          | 35     | 1                 | 112                     | 13                              | 1                                            | 1                                        | 0                | 1.39.E+07          | 1.33.E+07          | 1.25.E+07          | 1.09.E+07          | 2.21.E+07              | 2.37.E+07              | 1.99.E+07              | 2.12.E+07              |           |
| 2431 | Q8IV08    | Phospholipase D3 [OS=Homo sapiens]                                                            | 4.0           | 2            | 1          | 10     | 1                 | 87                      | 12                              | 1                                            | 1                                        | 0                | 4.60.E+07          | 3.14.E+07          | 2.98.E+07          | 2.66.E+07          |                        |                        |                        |                        |           |
| 2432 | Q6PD74    | Alpha- and gamma-adaptin-binding protein p34 [OS=Homo sapiens]                                | 4.0           | 4            | 1          | 4      | 1                 | 52                      | 2                               | 1                                            | 1                                        | 0                | 8.35.E+06          | 7.02.E+06          | 2.95.E+06          | 1.03.E+07          | 2.18.E+07              | 1.82.E+07              | 2.29.E+07              | 1.78.E+07              |           |
| 2433 | Q9Y3A3    | MOB-like protein phocein [OS=Homo sapiens]                                                    | 4.0           | 4            | 1          | 14     | 1                 | 13                      | 2                               | 1                                            | 1                                        | 0                | 9.40.E+06          | 8.63.E+06          | 8.75.E+06          | 8.99.E+06          | 7.53.E+06              | 8.09.E+06              | 9.84.E+06              | 8.43.E+06              |           |
| 2434 | Q9Y4A5    | Transformation/transcription domain-associated protein [OS=Homo sapiens]                      | 4.0           | 1            | 2          | 10     | 2                 | 0                       | 0                               | 1                                            | 2                                        | 0                | 1.15.E+07          | 9.60.E+06          | 1.25.E+07          | 1.09.E+07          | 1.39.E+07              | 1.49.E+07              | 1.69.E+07              | 1.39.E+07              |           |
| 2435 | Q9NWU2    | Glucose-induced degradation protein 8 homolog [OS=Homo sapiens]                               | 4.0           | 10           | 1          | 8      | 1                 | 57                      | 9                               | 1                                            | 1                                        | 0                |                    | 1.98.E+06          |                    |                    |                        | 1.13.E+07              | 9.32.E+06              | 8.95.E+06              | 8.98.E+06 |
| 2436 | Q8TEQ6    | gem-associated protein 5 [OS=Homo sapiens]                                                    | 3.9           | 2            | 1          | 10     | 1                 | 18                      | 0                               | 1                                            | 1                                        | 0                | 5.35.E+06          | 7.16.E+06          | 5.67.E+06          | 6.93.E+06          | 6.16.E+06              | 6.11.E+06              | 4.59.E+06              | 6.59.E+06              |           |
| 2437 | P51451    | Tyrosine-protein kinase Blk [OS=Homo sapiens]                                                 | 3.9           | 3            | 2          | 45     | 1                 | 207                     | 7                               | 1                                            | 2                                        | 0                | 2.70.E+08          | 2.48.E+08          | 2.64.E+08          | 2.93.E+08          | 2.96.E+08              | 2.66.E+08              | 3.00.E+08              | 2.81.E+08              |           |
| 2438 | Q9NQ22    | Something about silencing protein 10 [OS=Homo sapiens]                                        | 3.9           | 5            | 1          | 26     | 1                 | 67                      | 15                              | 1                                            | 1                                        | 0                | 1.77.E+07          | 2.71.E+07          |                    | 2.72.E+07          |                        |                        | 1.12.E+07              | 2.14.E+07              |           |

| No.  | Accession | Description                                                                                  | Sum PEP Score | Coverage [%] | # Peptides | # PSMs | # Unique Peptides | Score Mascot: A5 Mascot | Score Sequest HT: A2 Sequest HT | # Peptides (by Search Engine): A2 Sequest HT | # Peptides (by Search Engine): A5 Mascot | # Razor Peptides | ctrl Abundance_s_1 | ctrl Abundance_s_2 | ctrl Abundance_s_3 | ctrl Abundance_s_4 | JAM-A KO Abundance_s_1 | JAM-A KO Abundance_s_2 | JAM-A KO Abundance_s_3 | JAM-A KO Abundance_s_4 |
|------|-----------|----------------------------------------------------------------------------------------------|---------------|--------------|------------|--------|-------------------|-------------------------|---------------------------------|----------------------------------------------|------------------------------------------|------------------|--------------------|--------------------|--------------------|--------------------|------------------------|------------------------|------------------------|------------------------|
| 2439 | Q9UIJ7-1  | GTP:AMP phosphotransferase AK3, mitochondrial [OS=Homo sapiens]                              | 3.9           | 7            | 1          | 2      | 1                 | 26                      | 2                               | 1                                            | 1                                        | 0                | 6.14.E+06          | 6.87.E+06          | 4.27.E+06          | 5.36.E+06          | 9.60.E+06              | 8.60.E+06              | 1.00.E+07              | 1.05.E+07              |
| 2440 | P29084    | transcription initiation factor iie subunit beta [OS=Homo sapiens]                           | 3.9           | 7            | 1          | 9      | 1                 | 16                      | 8                               | 1                                            | 1                                        | 0                | 6.44.E+06          | 8.13.E+06          | 6.41.E+06          | 8.36.E+06          | 7.19.E+06              | 6.16.E+06              | 4.42.E+06              | 7.87.E+06              |
| 2441 | Q5T440    | Putative transferase CAF17, mitochondrial [OS=Homo sapiens]                                  | 3.9           | 9            | 1          | 4      | 1                 | 46                      | 5                               | 1                                            | 1                                        | 0                |                    |                    | 1.64.E+06          | 4.45.E+06          | 3.54.E+06              | 3.15.E+06              | 3.23.E+06              | 3.66.E+06              |
| 2442 | Q96G23    | Ceramide synthase 2 [OS=Homo sapiens]                                                        | 3.9           | 2            | 1          | 8      | 1                 | 33                      | 7                               | 1                                            | 1                                        | 0                | 5.90.E+07          | 5.19.E+07          | 5.30.E+07          | 4.75.E+07          | 5.75.E+07              | 5.03.E+07              | 5.71.E+07              | 5.35.E+07              |
| 2443 | Q9GZM5    | protein YIPF3 [OS=Homo sapiens]                                                              | 3.9           | 7            | 1          | 6      | 1                 | 17                      | 9                               | 1                                            | 1                                        | 0                | 7.37.E+06          | 1.02.E+07          | 7.29.E+06          | 7.93.E+06          |                        |                        |                        |                        |
| 2444 | Q9C0C2    | 182 kDa tankyrase-1-binding protein [OS=Homo sapiens]                                        | 3.9           | 1            | 1          | 2      | 1                 | 42                      | 2                               | 1                                            | 1                                        | 0                |                    |                    |                    |                    |                        |                        |                        |                        |
| 2445 | Q9NRN7    | L-aminoadipate-semialdehyde dehydrogenase-phosphopantetheinyl transferase [OS=Homo sapiens]  | 3.9           | 4            | 1          | 2      | 1                 | 18                      | 2                               | 1                                            | 1                                        | 0                | 1.81.E+07          |                    | 2.27.E+07          | 2.11.E+07          | 2.73.E+07              | 2.46.E+07              | 2.03.E+07              | 3.11.E+07              |
| 2446 | Q7L5D6    | Golgi to ER traffic protein 4 homolog [OS=Homo sapiens]                                      | 3.9           | 4            | 1          | 4      | 1                 | 16                      |                                 |                                              | 1                                        | 0                | 2.32.E+07          | 2.62.E+07          | 2.62.E+07          | 2.12.E+07          | 2.68.E+07              | 2.25.E+07              | 2.72.E+07              | 2.50.E+07              |
| 2447 | Q3KQU3    | MAP7 domain-containing protein 1 [OS=Homo sapiens]                                           | 3.8           | 2            | 1          | 12     | 1                 | 54                      | 4                               | 1                                            | 1                                        | 0                |                    |                    |                    |                    |                        |                        |                        |                        |
| 2448 | Q13523    | Serine/threonine-protein kinase PRP4 homolog [OS=Homo sapiens]                               | 3.8           | 1            | 1          | 4      | 1                 | 35                      | 4                               | 1                                            | 1                                        | 0                | 6.85.E+06          | 5.62.E+06          | 4.20.E+06          | 6.25.E+06          | 1.25.E+07              | 7.78.E+06              | 6.34.E+06              | 9.10.E+06              |
| 2449 | Q9NQH7-1  | Probable Xaa-Pro aminopeptidase 3 [OS=Homo sapiens]                                          | 3.8           | 7            | 2          | 293    | 1                 | 1103                    | 12                              | 2                                            | 2                                        | 0                | 9.29.E+06          | 1.12.E+07          | 5.92.E+06          | 1.12.E+07          | 1.28.E+07              | 1.15.E+07              | 1.04.E+07              |                        |
| 2450 | Q8TEA8    | D-tyrosyl-tRNA(Tyr) deacylase 1 [OS=Homo sapiens]                                            | 3.8           | 13           | 2          | 17     | 2                 | 19                      | 2                               | 2                                            | 1                                        | 0                | 5.03.E+06          | 5.44.E+06          | 5.06.E+06          | 4.20.E+06          | 4.61.E+06              | 5.65.E+06              | 5.47.E+06              | 4.97.E+06              |
| 2451 | Q9H5Q4    | Dimethyladenosine transferase 2, mitochondrial [OS=Homo sapiens]                             | 3.8           | 4            | 1          | 8      | 1                 | 15                      | 8                               | 1                                            | 1                                        | 0                | 8.06.E+06          | 1.06.E+07          | 7.70.E+06          | 7.82.E+06          | 1.25.E+07              | 1.18.E+07              | 9.49.E+06              | 9.91.E+06              |
| 2452 | Q8IWA0    | WD repeat-containing protein 75 [OS=Homo sapiens]                                            | 3.8           | 2            | 1          | 12     | 1                 | 76                      | 10                              | 1                                            | 1                                        | 0                | 9.73.E+06          | 9.24.E+06          | 6.93.E+06          | 9.29.E+06          | 9.64.E+06              | 9.59.E+06              | 6.31.E+06              | 9.19.E+06              |
| 2453 | P42566-1  | epidermal growth factor receptor substrate 15 [OS=Homo sapiens]                              | 3.8           | 2            | 1          | 9      | 1                 | 39                      | 0                               | 1                                            | 1                                        | 0                | 5.82.E+06          | 6.00.E+06          | 4.73.E+06          | 6.88.E+06          | 8.51.E+06              | 8.24.E+06              | 7.13.E+06              | 7.95.E+06              |
| 2454 | Q9UHI6    | Probable ATP-dependent RNA helicase DDX20 [OS=Homo sapiens]                                  | 3.8           | 3            | 1          | 2      | 1                 | 0                       | 3                               | 1                                            | 1                                        | 0                | 1.03.E+07          | 1.13.E+07          | 9.52.E+06          | 1.14.E+07          | 1.11.E+07              | 5.32.E+06              | 1.12.E+07              | 1.06.E+07              |
| 2455 | O43299    | AP-5 complex subunit zeta-1 [OS=Homo sapiens]                                                | 3.8           | 2            | 1          | 15     | 1                 | 23                      |                                 |                                              | 1                                        | 0                | 1.69.E+07          | 2.52.E+07          | 1.97.E+07          | 2.60.E+07          | 2.19.E+07              | 2.48.E+07              | 2.95.E+07              | 2.61.E+07              |
| 2456 | Q96T23    | remodeling and spacing factor 1 [OS=Homo sapiens]                                            | 3.8           | 1            | 1          | 10     | 1                 | 31                      | 9                               | 1                                            | 1                                        | 0                | 4.22.E+06          | 5.82.E+06          | 6.45.E+06          | 6.24.E+06          | 6.98.E+06              | 5.33.E+06              | 4.30.E+06              | 5.21.E+06              |
| 2457 | Q9NYC9-1  | Dynein heavy chain 9, axonemal [OS=Homo sapiens]                                             | 3.8           | 0            | 1          | 5      | 1                 | 23                      | 5                               | 1                                            | 1                                        | 0                | 3.46.E+07          | 3.27.E+07          | 3.21.E+07          | 2.95.E+07          | 2.82.E+07              | 2.89.E+07              | 3.07.E+07              | 2.91.E+07              |
| 2458 | Q9BXB5    | Oxysterol-binding protein-related protein 10 [OS=Homo sapiens]                               | 3.8           | 1            | 1          | 6      | 1                 | 22                      | 2                               | 1                                            | 1                                        | 0                | 7.99.E+06          | 6.94.E+06          | 6.93.E+06          | 7.92.E+06          | 7.19.E+06              | 6.73.E+06              | 7.82.E+05              | 7.25.E+06              |
| 2459 | Q9GZY8-1  | Mitochondrial fission factor [OS=Homo sapiens]                                               | 3.8           | 9            | 1          | 25     | 1                 | 13                      | 2                               | 1                                            | 1                                        | 0                |                    | 1.33.E+07          |                    | 1.25.E+07          | 1.64.E+07              | 1.95.E+07              | 1.60.E+07              | 1.93.E+07              |
| 2460 | Q70Z35-1  | Phosphatidylinositol 3,4,5-trisphosphate-dependent Rac exchanger 2 protein [OS=Homo sapiens] | 3.8           | 1            | 1          | 66     | 1                 | 0                       | 0                               | 1                                            | 1                                        | 0                | 2.22.E+07          | 1.48.E+07          | 1.91.E+07          | 1.46.E+07          | 1.09.E+07              | 1.19.E+07              | 1.15.E+07              | 8.98.E+06              |
| 2461 | Q9GZZ9-1  | Ubiquitin-like modifier-activating enzyme 5 [OS=Homo sapiens]                                | 3.8           | 5            | 1          | 14     | 1                 | 0                       | 2                               | 1                                            | 1                                        | 0                | 6.55.E+06          | 7.92.E+06          | 5.93.E+06          | 6.19.E+06          | 8.92.E+06              | 8.92.E+06              | 8.31.E+06              | 9.82.E+06              |
| 2462 | Q9BV20-1  | methylthioribose-1-phosphate isomerase [OS=Homo sapiens]                                     | 3.8           | 4            | 1          | 21     | 1                 | 65                      | 5                               | 1                                            | 1                                        | 0                | 5.89.E+06          | 7.53.E+06          | 4.47.E+06          | 5.06.E+06          | 1.24.E+07              | 1.09.E+07              | 9.51.E+06              | 1.11.E+07              |
| 2463 | Q8NBQ5    | Estradiol 17-beta-dehydrogenase 11 [OS=Homo sapiens]                                         | 3.7           | 5            | 1          | 3      | 1                 | 20                      | 0                               | 1                                            | 1                                        | 0                | 4.72.E+06          | 4.54.E+06          | 2.73.E+06          | 5.20.E+06          | 7.66.E+06              | 6.64.E+06              | 6.75.E+06              | 5.47.E+06              |
| 2464 | Q9P0R6    | GSK3-beta interaction protein [OS=Homo sapiens]                                              | 3.7           | 24           | 1          | 4      | 1                 | 55                      | 2                               | 1                                            | 1                                        | 0                | 8.40.E+06          | 9.71.E+06          | 8.60.E+06          | 2.20.E+06          | 1.50.E+06              | 4.71.E+06              | 1.18.E+07              | 1.43.E+07              |
| 2465 | O43264    | Centromere/kinetochore protein zw10 homolog [OS=Homo sapiens]                                | 3.7           | 2            | 1          | 4      | 1                 | 48                      | 4                               | 1                                            | 1                                        | 0                |                    | 5.40.E+06          |                    | 4.68.E+06          | 7.46.E+06              | 3.34.E+06              | 6.10.E+06              | 6.11.E+06              |
| 2466 | Q15020    | Squamous cell carcinoma antigen recognized by T-cells 3 [OS=Homo sapiens]                    | 3.7           | 1            | 1          | 2      | 1                 | 18                      | 2                               | 1                                            | 1                                        | 0                | 6.22.E+06          |                    | 1.13.E+07          |                    | 7.57.E+06              |                        | 8.43.E+06              | 1.00.E+07              |
| 2467 | P00395    | Cytochrome c oxidase subunit 1 [OS=Homo sapiens]                                             | 3.7           | 6            | 1          | 2      | 1                 | 0                       | 0                               | 1                                            | 1                                        | 0                | 1.13.E+07          | 8.28.E+06          | 2.25.E+06          | 2.75.E+06          | 4.14.E+06              | 2.03.E+06              |                        | 5.04.E+06              |
| 2468 | Q8WTS6    | Histone-lysine N-methyltransferase SETD7 [OS=Homo sapiens]                                   | 3.7           | 4            | 1          | 6      | 1                 | 26                      | 6                               | 1                                            | 1                                        | 0                | 2.15.E+07          | 2.30.E+07          | 2.23.E+07          | 3.28.E+07          | 3.88.E+07              |                        | 5.08.E+07              | 4.16.E+07              |
| 2469 | Q8WXC6-2  | COP9 signalosome complex subunit 9 [OS=Homo sapiens]                                         | 3.7           | 35           | 1          | 40     | 1                 | 745                     | 45                              | 1                                            | 1                                        | 0                | 1.39.E+07          | 1.64.E+07          | 1.41.E+07          | 1.57.E+07          | 9.93.E+06              | 1.27.E+07              | 7.31.E+06              | 1.05.E+07              |
| 2470 | Q96RQ1    | Endoplasmic reticulum-Golgi intermediate compartment protein 2 [OS=Homo sapiens]             | 3.7           | 6            | 1          | 4      | 1                 | 29                      | 5                               | 1                                            | 1                                        | 0                |                    |                    |                    |                    |                        |                        |                        |                        |
| 2471 | Q14435    | Polypeptide N-acetylgalactosaminyltransferase 3 [OS=Homo sapiens]                            | 3.7           | 2            | 1          | 8      | 1                 | 14                      | 5                               | 1                                            | 1                                        | 0                | 8.73.E+06          | 7.66.E+06          | 7.74.E+06          | 9.46.E+06          | 7.50.E+06              | 7.56.E+06              | 7.21.E+06              | 7.26.E+06              |
| 2472 | Q9H8H0    | nucleolar protein 11 [OS=Homo sapiens]                                                       | 3.6           | 3            | 1          | 4      | 1                 | 35                      | 0                               | 1                                            | 1                                        | 0                | 3.95.E+06          | 2.69.E+06          | 3.63.E+06          | 2.31.E+06          | 5.16.E+06              | 3.96.E+06              | 4.38.E+06              | 2.64.E+06              |
| 2473 | Q86YP4    | Transcriptional repressor p66-alpha [OS=Homo sapiens]                                        | 3.6           | 2            | 1          | 4      | 1                 | 53                      | 2                               | 1                                            | 1                                        | 0                | 5.45.E+06          | 6.08.E+06          | 5.66.E+06          | 6.53.E+06          | 2.88.E+06              | 2.53.E+06              | 3.65.E+06              | 3.88.E+06              |
| 2474 | Q86SX6    | Glutaredoxin-related protein 5, mitochondrial [OS=Homo sapiens]                              | 3.6           | 11           | 1          | 8      | 1                 | 0                       | 9                               | 1                                            | 1                                        | 0                | 9.30.E+06          | 1.10.E+07          | 1.33.E+07          | 1.38.E+07          |                        |                        |                        |                        |
| 2475 | Q9NWU5    | 39S ribosomal protein L22, mitochondrial [OS=Homo sapiens]                                   | 3.6           | 4            | 1          | 27     | 1                 | 13                      | 0                               | 1                                            | 1                                        | 0                | 1.59.E+06          | 1.72.E+06          | 1.92.E+06          | 1.43.E+06          | 1.10.E+06              | 1.22.E+06              | 9.03.E+05              | 1.12.E+06              |
| 2476 | P60468    | protein transport protein Sec61 subunit beta [OS=Homo sapiens]                               | 3.6           | 11           | 1          | 34     | 1                 | 77                      | 25                              | 1                                            | 1                                        | 0                | 1.99.E+07          | 1.73.E+07          | 1.69.E+07          | 2.09.E+07          | 1.35.E+07              | 1.59.E+07              | 1.55.E+07              | 1.31.E+07              |
| 2477 | Q16762    | thiosulfate sulfurtransferase [OS=Homo sapiens]                                              | 3.6           | 6            | 1          | 14     | 1                 | 23                      | 9                               | 1                                            | 1                                        | 0                | 1.54.E+07          | 1.39.E+07          | 1.54.E+07          | 1.77.E+07          | 1.86.E+07              | 2.25.E+07              | 2.39.E+07              | 2.12.E+07              |
| 2478 | O75439    | mitochondrial-processing peptidase subunit beta [OS=Homo sapiens]                            | 3.6           | 2            | 1          | 10     | 1                 | 0                       | 10                              | 1                                            | 1                                        | 0                | 1.98.E+07          | 1.87.E+07          | 2.03.E+07          | 1.24.E+07          |                        |                        |                        |                        |
| 2479 | Q86WB0    | Nuclear-interacting partner of ALK [OS=Homo sapiens]                                         | 3.6           | 2            | 1          | 4      | 1                 | 15                      | 0                               | 1                                            | 1                                        | 0                | 4.71.E+06          | 4.76.E+06          | 7.33.E+06          | 3.03.E+06          | 4.24.E+06              | 4.40.E+06              | 8.55.E+06              | 5.09.E+06              |
| 2480 | P10619    | lysosomal protective protein [OS=Homo sapiens]                                               | 3.6           | 2            | 1          | 71     | 1                 | 63                      | 0                               | 1                                            | 1                                        | 0                | 3.97.E+07          | 3.93.E+07          | 4.22.E+07          | 3.68.E+07          | 5.10.E+07              | 5.65.E+07              | 5.28.E+07              | 4.98.E+07              |
| 2481 | Q92692-1  | Nectin-2 [OS=Homo sapiens]                                                                   | 3.6           | 2            | 1          | 6      | 1                 | 26                      | 0                               | 1                                            | 1                                        | 0                |                    |                    |                    |                    | 6.72.E+06              | 5.86.E+06              | 2.68.E+06              | 1.12.E+07              |
| 2482 | Q96B97-1  | SH3 domain-containing kinase-binding protein 1 [OS=Homo sapiens]                             | 3.6           | 2            | 1          | 39     | 1                 | 14                      | 0                               | 1                                            | 1                                        | 0                | 5.77.E+06          | 5.44.E+06          | 6.10.E+06          | 4.86.E+06          | 2.98.E+06              | 3.36.E+06              | 3.43.E+06              | 2.97.E+06              |
| 2483 | Q13601    | KRR1 small subunit processome component homolog [OS=Homo sapiens]                            | 3.6           | 2            | 1          | 8      | 1                 | 14                      | 4                               | 1                                            | 1                                        | 0                | 1.26.E+07          | 2.89.E+07          | 1.33.E+07          | 9.28.E+06          | 9.44.E+06              | 1.77.E+07              | 2.34.E+07              | 1.45.E+07              |
| 2484 | Q14241    | Elongin-A [OS=Homo sapiens]                                                                  | 3.6           | 5            | 1          | 16     | 1                 | 18                      | 3                               | 1                                            | 1                                        | 0                | 1.12.E+07          | 1.20.E+07          | 1.05.E+07          | 1.14.E+07          | 1.03.E+07              | 8.63.E+06              | 7.36.E+06              | 2.70.E+06              |



| No.  | Accession | Description                                                        | Sum PEP Score | Coverage [%] | # Peptides | # PSMs | # Unique Peptides | Score Mascot: A5 Mascot | Score Sequest HT: A2 Sequest HT | # Peptides (by Search Engine): A2 Sequest HT | # Peptides (by Search Engine): A5 Mascot | # Razor Peptides | ctrl Abundance s_1 | ctrl Abundance s_2 | ctrl Abundance s_3 | ctrl Abundance s_4 | JAM-A KO Abundance s_1 | JAM-A KO Abundance s_2 | JAM-A KO Abundance s_3 | JAM-A KO Abundance s_4 |
|------|-----------|--------------------------------------------------------------------|---------------|--------------|------------|--------|-------------------|-------------------------|---------------------------------|----------------------------------------------|------------------------------------------|------------------|--------------------|--------------------|--------------------|--------------------|------------------------|------------------------|------------------------|------------------------|
| 2485 | P78560    | Death domain-containing protein CRADD [OS=Homo sapiens]            | 3.5           | 8            | 1          | 4      | 1                 | 35                      | 2                               | 1                                            | 1                                        | 0                | 3.86.E+06          | 3.15.E+06          | 2.70.E+06          | 4.05.E+06          | 2.17.E+06              | 1.88.E+06              | 2.11.E+06              | 2.93.E+06              |
| 2486 | P25490    | Transcriptional repressor protein YY1 [OS=Homo sapiens]            | 3.5           | 2            | 1          | 20     | 1                 | 66                      | 15                              | 1                                            | 1                                        | 0                | 4.09.E+07          | 3.93.E+07          | 3.82.E+07          | 3.57.E+07          | 3.51.E+07              | 3.31.E+07              | 3.32.E+07              | 3.33.E+07              |
| 2487 | Q9P0V3-1  | SH3 domain-binding protein 4 [OS=Homo sapiens]                     | 3.5           | 2            | 1          | 14     | 1                 | 104                     | 4                               | 1                                            | 1                                        | 0                | 8.33.E+06          | 7.99.E+06          | 5.43.E+06          | 6.79.E+06          | 8.32.E+06              | 7.03.E+06              | 6.33.E+06              | 6.44.E+06              |
| 2488 | Q96EY4    | translation machinery-associated protein 16 [OS=Homo sapiens]      | 3.5           | 13           | 2          | 3      | 2                 | 15                      | 0                               | 1                                            | 2                                        | 0                | 9.60.E+06          | 7.23.E+06          | 8.89.E+06          | 8.65.E+06          | 9.79.E+06              | 1.05.E+07              | 1.11.E+07              | 1.07.E+07              |
| 2489 | Q8NI35    | InaD-like protein [OS=Homo sapiens]                                | 3.5           | 1            | 2          | 23     | 1                 |                         | 15                              | 2                                            |                                          | 0                |                    |                    |                    |                    |                        |                        |                        |                        |
| 2490 | Q9Y2R4    | Probable ATP-dependent RNA helicase DDX52 [OS=Homo sapiens]        | 3.5           | 2            | 1          | 10     | 1                 | 30                      | 2                               | 1                                            | 1                                        | 0                |                    |                    |                    |                    |                        |                        |                        |                        |
| 2491 | Q16563    | Synaptophysin-like protein 1 [OS=Homo sapiens]                     | 3.5           | 4            | 1          | 42     | 1                 | 188                     | 41                              | 1                                            | 1                                        | 0                |                    |                    |                    |                    |                        |                        |                        |                        |
| 2492 | Q9BX40    | protein LSM14 homolog B [OS=Homo sapiens]                          | 3.5           | 3            | 1          | 4      | 1                 | 19                      | 3                               | 1                                            | 1                                        | 0                | 1.97.E+07          | 1.40.E+07          | 1.87.E+07          | 1.22.E+07          | 1.76.E+07              | 1.88.E+07              | 1.99.E+07              | 1.51.E+07              |
| 2493 | Q96SU4    | Oxysterol-binding protein-related protein 9 [OS=Homo sapiens]      | 3.5           | 1            | 1          | 6      | 1                 | 71                      | 6                               | 1                                            | 1                                        | 0                | 1.45.E+07          | 1.49.E+07          | 1.49.E+07          | 1.49.E+07          | 1.96.E+07              | 1.74.E+07              | 3.96.E+06              | 1.45.E+07              |
| 2494 | Q9UIV1-1  | CCR4-NOT transcription complex subunit 7 [OS=Homo sapiens]         | 3.5           | 5            | 1          | 2      | 1                 | 0                       | 2                               | 1                                            | 1                                        | 0                |                    |                    |                    |                    |                        |                        |                        |                        |
| 2495 | Q969G6    | Riboflavin kinase [OS=Homo sapiens]                                | 3.5           | 14           | 1          | 10     | 1                 | 99                      | 2                               | 1                                            | 1                                        | 0                | 6.98.E+06          | 7.20.E+06          | 6.54.E+06          | 6.68.E+06          | 6.65.E+06              | 4.48.E+06              | 5.57.E+06              | 4.96.E+06              |
| 2496 | P14209    | CD99 antigen [OS=Homo sapiens]                                     | 3.5           | 18           | 1          | 6      | 1                 | 27                      | 0                               | 1                                            | 1                                        | 0                | 2.99.E+05          | 6.15.E+05          | 5.76.E+05          | 6.28.E+05          |                        |                        |                        |                        |
| 2497 | Q9UNN8    | Endothelial protein C receptor [OS=Homo sapiens]                   | 3.4           | 4            | 1          | 4      | 1                 | 23                      | 2                               | 1                                            | 0                                        | 7.57.E+06        | 5.61.E+06          | 5.13.E+06          | 5.01.E+06          | 1.72.E+07          | 2.19.E+07              | 1.95.E+07              | 2.02.E+07              |                        |
| 2498 | Q96EL2    | 28S ribosomal protein S24, mitochondrial [OS=Homo sapiens]         | 3.4           | 12           | 1          | 2      | 1                 | 16                      | 3                               | 1                                            | 1                                        | 0                | 9.62.E+06          | 9.03.E+06          | 3.98.E+06          |                    | 1.03.E+07              | 8.62.E+06              | 1.06.E+07              |                        |
| 2499 | Q9Y3Y2    | Chromatin target of PRMT1 protein [OS=Homo sapiens]                | 3.4           | 5            | 1          | 4      | 1                 | 51                      | 2                               | 1                                            | 1                                        | 0                | 3.31.E+06          | 3.01.E+06          | 2.77.E+06          |                    | 1.88.E+06              |                        |                        | 1.56.E+06              |
| 2500 | P56385    | ATP synthase subunit e, mitochondrial [OS=Homo sapiens]            | 3.4           | 10           | 1          | 6      | 1                 | 57                      | 6                               | 1                                            | 1                                        | 0                | 1.19.E+07          | 1.03.E+07          | 1.06.E+07          | 1.31.E+07          | 9.52.E+06              | 1.13.E+07              | 1.18.E+07              | 9.14.E+06              |
| 2501 | Q12996-1  | Cleavage stimulation factor subunit 3 [OS=Homo sapiens]            | 3.4           | 2            | 1          | 2      | 1                 | 23                      | 2                               | 1                                            | 1                                        | 0                |                    |                    |                    |                    |                        |                        |                        |                        |
| 2502 | Q02224    | Centromere-associated protein E [OS=Homo sapiens]                  | 3.4           | 1            | 2          | 35     | 2                 | 0                       | 9                               | 1                                            | 2                                        | 0                | 6.06.E+07          | 5.54.E+07          | 7.14.E+07          | 4.73.E+07          | 5.57.E+07              | 5.54.E+07              | 5.38.E+07              | 5.31.E+07              |
| 2503 | Q8WUA2    | Peptidyl-prolyl cis-trans isomerase-like 4 [OS=Homo sapiens]       | 3.4           | 6            | 1          | 2      | 1                 | 0                       | 2                               | 1                                            | 1                                        | 0                | 1.63.E+07          | 2.04.E+07          | 1.82.E+07          | 1.84.E+07          | 2.12.E+07              | 1.91.E+07              | 1.86.E+07              | 1.81.E+07              |
| 2504 | Q95298-1  | NADH dehydrogenase [ubiquinone] 1 subunit C2 [OS=Homo sapiens]     | 3.4           | 10           | 1          | 19     | 1                 | 17                      | 0                               | 1                                            | 1                                        | 0                | 8.45.E+06          | 8.39.E+06          | 1.28.E+07          | 1.01.E+07          | 1.06.E+07              | 1.22.E+07              | 1.07.E+07              | 1.15.E+07              |
| 2505 | Q05048    | Cleavage stimulation factor subunit 1 [OS=Homo sapiens]            | 3.4           | 6            | 1          | 2      | 1                 | 18                      | 3                               | 1                                            | 1                                        | 0                | 3.29.E+06          | 3.89.E+06          | 8.24.E+06          | 6.63.E+06          | 6.32.E+06              | 6.01.E+06              | 8.00.E+06              | 1.06.E+07              |
| 2506 | Q86V88    | Magnesium-dependent phosphatase 1 [OS=Homo sapiens]                | 3.4           | 10           | 1          | 2      | 1                 | 43                      | 0                               | 1                                            | 1                                        | 0                | 4.81.E+06          |                    | 3.54.E+06          | 4.66.E+06          | 2.46.E+05              |                        | 5.29.E+05              | 1.16.E+06              |
| 2507 | Q9UHQ9    | NADH-cytochrome b5 reductase 1 [OS=Homo sapiens]                   | 3.4           | 4            | 1          | 2      | 1                 | 0                       | 2                               | 1                                            | 1                                        | 0                |                    |                    | 1.12.E+08          |                    | 1.16.E+07              |                        |                        | 1.28.E+08              |
| 2508 | Q9H098    | Protein FAM107B [OS=Homo sapiens]                                  | 3.4           | 14           | 1          | 1      | 1                 | 43                      |                                 |                                              |                                          | 0                | 1.06.E+07          | 1.19.E+07          | 7.85.E+06          | 1.19.E+07          | 2.37.E+07              | 3.08.E+07              | 2.33.E+07              | 1.63.E+07              |
| 2509 | Q15006    | ER membrane protein complex subunit 2 [OS=Homo sapiens]            | 3.4           | 6            | 1          | 5      | 1                 | 0                       | 0                               | 1                                            | 1                                        | 0                | 2.49.E+06          | 3.14.E+06          | 2.85.E+06          | 2.02.E+06          | 2.98.E+06              | 2.25.E+06              | 2.79.E+06              |                        |
| 2510 | Q94901-1  | SUN domain-containing protein 1 [OS=Homo sapiens]                  | 3.3           | 2            | 1          | 2      | 1                 | 0                       | 2                               | 1                                            | 1                                        | 0                | 5.60.E+06          | 6.35.E+06          | 6.65.E+06          | 7.22.E+06          | 6.01.E+06              | 6.71.E+06              | 6.32.E+06              | 6.82.E+06              |
| 2511 | P49005    | DNA polymerase delta subunit 2 [OS=Homo sapiens]                   | 3.3           | 5            | 1          | 1      | 1                 |                         | 0                               | 1                                            | 0                                        | 3.52.E+06        | 8.86.E+06          | 3.31.E+06          | 1.02.E+07          | 8.20.E+06          | 1.01.E+07              | 3.90.E+06              | 8.89.E+06              |                        |
| 2512 | P11172    | uridine 5'-monophosphate synthase [OS=Homo sapiens]                | 3.3           | 2            | 1          | 4      | 1                 | 14                      | 5                               | 1                                            | 1                                        | 0                | 3.84.E+07          | 3.69.E+07          | 4.02.E+07          | 3.36.E+07          | 1.37.E+07              |                        | 2.43.E+07              | 2.12.E+07              |
| 2513 | O43719    | HIV Tat-specific factor 1 [OS=Homo sapiens]                        | 3.3           | 2            | 1          | 2      | 1                 | 16                      | 3                               | 1                                            | 1                                        | 0                | 3.58.E+06          | 3.85.E+06          | 4.23.E+06          | 3.27.E+06          | 3.30.E+06              | 4.26.E+06              |                        | 5.17.E+06              |
| 2514 | Q15642    | Cdc42-interacting protein 4 [OS=Homo sapiens]                      | 3.3           | 4            | 1          | 4      | 1                 | 18                      | 0                               | 1                                            | 1                                        | 0                | 1.94.E+06          | 2.41.E+06          | 2.75.E+06          | 1.87.E+06          | 3.54.E+06              | 3.63.E+06              | 4.82.E+06              | 3.51.E+06              |
| 2515 | O43402    | ER membrane protein complex subunit 8 [OS=Homo sapiens]            | 3.3           | 4            | 1          | 2      | 1                 | 16                      | 2                               | 1                                            | 1                                        | 0                | 4.20.E+07          | 3.79.E+07          | 3.92.E+07          | 4.64.E+07          | 2.34.E+07              | 3.24.E+07              | 3.31.E+07              | 3.01.E+07              |
| 2516 | P78346-1  | ribonuclease P protein subunit p30 [OS=Homo sapiens]               | 3.3           | 3            | 1          | 5      | 1                 | 154                     | 1                               | 0                                            | 1                                        | 0                | 7.09.E+06          | 7.46.E+06          | 7.81.E+06          | 6.29.E+06          | 8.10.E+06              | 7.15.E+06              | 9.16.E+06              | 4.88.E+06              |
| 2517 | Q9UUKL0   | REST corepressor 1 [OS=Homo sapiens]                               | 3.3           | 3            | 1          | 2      | 1                 | 18                      | 2                               | 1                                            | 1                                        | 0                |                    |                    |                    |                    |                        |                        |                        |                        |
| 2518 | Q14676    | Mediator of DNA damage checkpoint protein 1 [OS=Homo sapiens]      | 3.2           | 1            | 1          | 14     | 1                 | 43                      | 2                               | 1                                            | 1                                        | 0                | 4.91.E+06          | 5.41.E+06          | 4.98.E+06          | 4.40.E+06          | 5.18.E+06              | 3.50.E+06              | 3.76.E+06              | 5.57.E+06              |
| 2519 | Q9H0U3    | Magnesium transporter protein 1 [OS=Homo sapiens]                  | 3.2           | 3            | 1          | 15     | 1                 | 72                      | 4                               | 1                                            | 1                                        | 0                | 1.31.E+07          | 1.08.E+07          | 1.31.E+07          | 1.44.E+07          | 1.17.E+07              | 1.50.E+07              | 1.73.E+07              | 1.29.E+07              |
| 2520 | Q8N726    | Tumor suppressor ARF [OS=Homo sapiens]                             | 3.2           | 14           | 1          | 2      | 1                 | 0                       | 0                               | 1                                            | 1                                        | 0                | 1.89.E+05          | 2.17.E+05          | 2.42.E+05          | 1.70.E+05          | 2.65.E+05              | 1.37.E+05              | 1.54.E+05              | 2.16.E+05              |
| 2521 | Q5TDH0    | Protein DDI1 homolog 2 [OS=Homo sapiens]                           | 3.2           | 4            | 1          | 2      | 1                 | 0                       | 2                               | 1                                            | 0                                        | 2.16.E+07        |                    |                    |                    |                    |                        |                        |                        | 2.73.E+07              |
| 2522 | Q9P2X0-1  | Dolichol-phosphate mannosyltransferase subunit 3 [OS=Homo sapiens] | 3.2           | 11           | 1          | 7      | 1                 | 0                       | 2                               | 1                                            | 1                                        | 0                |                    |                    |                    |                    |                        |                        |                        |                        |
| 2523 | Q8N7R7-1  | Cyclin-Y-like protein 1 [OS=Homo sapiens]                          | 3.2           | 5            | 1          | 4      | 1                 | 25                      | 3                               | 1                                            | 1                                        | 0                | 2.54.E+06          | 1.34.E+06          | 2.52.E+06          | 5.90.E+06          | 4.35.E+06              |                        |                        |                        |
| 2524 | Q12899    | Tripartite motif-containing protein 26 [OS=Homo sapiens]           | 3.2           | 3            | 1          | 2      | 1                 | 0                       | 0                               | 1                                            | 1                                        | 0                | 1.30.E+06          | 2.26.E+06          | 6.47.E+05          | 2.12.E+06          | 2.43.E+06              | 1.82.E+06              | 1.89.E+06              | 2.53.E+06              |
| 2525 | Q9UHQ4    | B-cell receptor-associated protein 29 [OS=Homo sapiens]            | 3.2           | 4            | 1          | 8      | 1                 | 31                      | 2                               | 1                                            | 0                                        | 7.12.E+06        | 8.13.E+06          | 8.07.E+06          | 6.90.E+06          | 8.26.E+06          | 4.59.E+06              | 1.97.E+06              |                        |                        |
| 2526 | Q96S66    | chloride channel CLIC-like protein 1 [OS=Homo sapiens]             | 3.2           | 3            | 1          | 8      | 1                 | 64                      | 0                               | 1                                            | 1                                        | 0                | 6.69.E+05          | 9.81.E+05          | 8.79.E+05          | 8.74.E+05          | 2.14.E+06              | 2.14.E+06              | 2.29.E+06              | 1.97.E+06              |
| 2527 | Q06481    | Amyloid-like protein 2 [OS=Homo sapiens]                           | 3.2           | 2            | 1          | 2      | 1                 | 0                       | 2                               | 3                                            | 1                                        | 0                |                    |                    |                    |                    | 2.64.E+07              | 1.24.E+07              | 1.67.E+07              | 2.68.E+07              |
| 2528 | P56270-1  | Myc-associated zinc finger protein [OS=Homo sapiens]               | 3.1           | 3            | 1          | 3      | 1                 | 0                       | 0                               | 1                                            | 1                                        | 0                | 7.63.E+05          | 6.79.E+05          | 8.59.E+05          | 4.88.E+05          | 5.61.E+05              | 6.23.E+05              | 6.31.E+05              | 5.26.E+05              |
| 2529 | P55212    | Caspase-6 [OS=Homo sapiens]                                        | 3.1           | 3            | 1          | 25     | 1                 | 51                      | 25                              | 1                                            | 1                                        | 0                |                    |                    |                    |                    |                        |                        |                        |                        |
| 2530 | Q99614    | tetratricopeptide repeat protein 1 [OS=Homo sapiens]               | 3.1           | 6            | 1          | 2      | 1                 | 26                      | 0                               | 1                                            | 1                                        | 0                | 2.13.E+06          | 5.28.E+06          | 4.27.E+06          | 4.84.E+06          | 6.95.E+06              | 6.70.E+06              | 5.09.E+06              | 6.66.E+06              |
| 2531 | Q12800-1  | Alpha-globin transcription factor CP2 [OS=Homo sapiens]            | 3.1           | 2            | 1          | 2      | 1                 | 0                       | 2                               | 1                                            | 1                                        | 0                | 1.24.E+07          |                    | 1.39.E+07          | 1.38.E+07          | 1.41.E+07              |                        |                        | 1.41.E+07              |
| 2532 | Q15075    | Early endosome antigen 1 [OS=Homo sapiens]                         | 3.1           | 1            | 1          | 4      | 1                 | 15                      | 6                               | 1                                            | 1                                        | 0                | 3.11.E+06          | 1.03.E+06          | 1.61.E+06          |                    | 5.71.E+06              | 5.90.E+06              |                        |                        |
| 2533 | Q16204    | coiled-coil domain-containing protein 6 [OS=Homo sapiens]          | 3.1           | 3            | 1          | 2      | 1                 | 38                      | 2                               | 1                                            | 1                                        | 0                | 5.68.E+06          | 4.82.E+06          | 6.45.E+06          | 7.76.E+06          | 8.62.E+06              | 1.18.E+07              | 8.66.E+06              | 9.88.E+06              |
| 2534 | Q9UHC6-1  | Contactin-associated protein-like 2 [OS=Homo sapiens]              | 3.1           | 1            | 1          | 20     | 1                 | 0                       | 0                               | 1                                            | 1                                        | 0                | 2.98.E+07          | 2.74.E+07          | 3.22.E+07          | 3.75.E+07          | 2.25.E+07              | 2.57.E+07              | 3.15.E+07              | 2.85.E+07              |
| 2535 | P09001    | 39S ribosomal protein L3, mitochondrial [OS=Homo sapiens]          | 3.1           | 5            | 1          | 4      | 1                 |                         | 2                               | 1                                            | 0                                        |                  |                    |                    |                    |                    | 7.99.E+07              | 7.21.E+07              |                        |                        |
| 2536 | Q9BSR8    | protein YIPF4 [OS=Homo sapiens]                                    | 3.1           | 4            | 1          | 4      | 1                 | 0                       | 4                               | 1                                            | 1                                        | 0                | 2.28.E+07          | 2.55.E+07          | 2.55.E+07          |                    |                        |                        |                        |                        |
| 2537 | O76095-1  | Protein JTB [OS=Homo sapiens]                                      | 3.1           | 9            | 1          | 8      | 1                 | 16                      | 0                               | 1                                            | 1                                        | 0                | 5.71.E+06          | 5.30.E+06          | 4.69.E+06          | 6.16.E+06          | 7.68.E+06              | 8.88.E+06              |                        | 7.62.E+06              |
| 2538 | Q9UPT8    | Zinc finger CCCH domain-containing protein 4 [OS=Homo sapiens]     | 3.1           | 1            | 1          | 20     | 1                 | 91                      | 17                              | 1                                            | 1                                        | 0                | 6.05.E+06          | 2.41.E+06          | 5.98.E+06          | 8.94.E+06          | 5.44.E+06              | 5.50.E+06              | 4.68.E+06              | 7.01.E+06              |
| 2539 | Q8IZ21-1  | Phosphatase and actin regulator 4 [OS=Homo sapiens]                | 3.1           | 1            | 1          | 2      | 1                 | 14                      | 0                               | 1                                            | 1                                        | 0                | 3.48.E+06          | 2.92.E+06          | 3.90.E+06          | 3.21.E+06          | 3.34.E+06              | 4.04.E+06              | 3.18.E+06              | 4.60.E+06              |
| 2540 | Q5JTJ3-1  | Cytochrome c oxidase assembly factor 6 homolog [OS=Homo sapiens]   | 3.1           | 11           | 1          | 2      | 1                 | 0                       | 0                               | 1                                            | 1                                        | 0                |                    |                    |                    |                    |                        |                        |                        |                        |
| 2541 | Q8TBA6    | Golgin subfamily A member 5 [OS=Homo sapiens]                      | 3.1           | 2            | 1          | 15     | 1                 | 25                      | 9                               | 1                                            | 1                                        | 0                | 1.40.E+07          | 1.10.E+07          | 1.20.E+07          | 1.04.E+07          | 1.69.E+07              | 1.74.E+07              | 1.84.E+07              | 2.01.E+07              |
| 2542 | Q9Y371    | Endophilin-B1 [OS=Homo sapiens]                                    | 3.1           | 4            | 1          | 2      | 1                 | 18                      | 2                               | 1                                            | 1                                        | 0                | 1.01.E+07          | 8.46.E+06          | 7.53.E+06          | 1.04.E+07          | 1.08.E+07              | 1.11.E+07              | 1.17.E+07              | 1.04.E+07              |

| No.  | Accession | Description                                                                                       | Sum PEP Score | Coverage [%] | # Peptides | # PSMs | # Unique Peptides | Score Mascot: A5 Mascot | Score Sequest HT: A2 Sequest HT | # Peptides (by Search Engine): A2 Sequest HT | # Peptides (by Search Engine): A5 Mascot | # Razor Peptides | ctrl Abundance s_1 | ctrl Abundance s_2 | ctrl Abundance s_3 | ctrl Abundance s_4 | JAM-A KO Abundance s_1 | JAM-A KO Abundance s_2 | JAM-A KO Abundance s_3 | JAM-A KO Abundance s_4 |
|------|-----------|---------------------------------------------------------------------------------------------------|---------------|--------------|------------|--------|-------------------|-------------------------|---------------------------------|----------------------------------------------|------------------------------------------|------------------|--------------------|--------------------|--------------------|--------------------|------------------------|------------------------|------------------------|------------------------|
| 2543 | Q7L2J0-1  | 7SK snRNA methylphosphate capping enzyme [OS=Homo sapiens]                                        | 3.0           | 1            | 1          | 20     | 1                 | 38                      | 0                               | 1                                            | 1                                        | 0                | 1.70.E+07          | 1.78.E+07          | 1.92.E+07          | 1.41.E+07          | 1.42.E+07              | 1.24.E+07              | 1.69.E+07              | 1.39.E+07              |
| 2544 | Q99523    | Sortilin [OS=Homo sapiens]                                                                        | 3.0           | 2            | 1          | 2      | 1                 | 15                      | 2                               | 1                                            | 1                                        | 0                |                    |                    | 1.16.E+07          |                    |                        |                        |                        | 2.03.E+07              |
| 2545 | Q96T37-1  | Putative RNA-binding protein 15 [OS=Homo sapiens]                                                 | 3.0           | 2            | 1          | 2      | 1                 | 0                       | 0                               | 1                                            | 1                                        | 0                |                    |                    | 6.10.E+06          | 1.13.E+07          | 5.60.E+06              | 6.12.E+06              | 4.48.E+06              |                        |
| 2546 | Q9Y3E2    | BolA-like protein 1 [OS=Homo sapiens]                                                             | 3.0           | 11           | 1          | 2      | 1                 | 0                       | 0                               | 1                                            | 1                                        | 0                | 8.24.E+06          | 9.38.E+06          | 8.40.E+06          | 7.87.E+06          | 1.00.E+07              | 1.26.E+07              | 1.19.E+07              | 9.20.E+06              |
| 2547 | O60287    | nucleolar pre-ribosomal-associated protein 1 [OS=Homo sapiens]                                    | 3.0           | 1            | 1          | 2      | 1                 | 41                      | 0                               | 1                                            | 1                                        | 0                | 3.29.E+06          | 1.06.E+06          | 3.00.E+06          | 2.25.E+06          | 1.48.E+06              |                        |                        |                        |
| 2548 | Q6ZRV2    | Protein FAM83H [OS=Homo sapiens]                                                                  | 3.0           | 1            | 1          | 1      | 1                 |                         | 0                               | 1                                            | 0                                        | 8.35.E+06        | 7.06.E+06          | 8.68.E+06          | 9.11.E+06          | 4.91.E+06          | 5.08.E+06              | 6.02.E+06              | 5.36.E+06              |                        |
| 2549 | O14530    | Thioredoxin domain-containing protein 9 [OS=Homo sapiens]                                         | 3.0           | 4            | 1          | 16     | 1                 | 55                      | 7                               | 1                                            | 1                                        | 0                | 1.56.E+07          | 1.70.E+07          | 1.58.E+07          | 1.22.E+07          | 1.65.E+07              | 1.70.E+07              | 1.59.E+07              | 1.72.E+07              |
| 2550 | P0CG08    | Golgi pH regulator B [OS=Homo sapiens]                                                            | 3.0           | 6            | 1          | 10     | 1                 | 38                      | 0                               | 1                                            | 1                                        | 0                | 4.19.E+07          | 3.42.E+07          | 4.17.E+07          | 4.74.E+07          | 7.00.E+07              | 3.65.E+07              |                        | 6.27.E+07              |
| 2551 | Q96AZ6-1  | Interferon-stimulated gene 20 kDa protein [OS=Homo sapiens]                                       | 3.0           | 4            | 1          | 8      | 1                 | 50                      | 2                               | 1                                            | 1                                        | 0                | 9.91.E+06          | 9.49.E+06          | 8.13.E+06          | 9.60.E+06          | 3.67.E+06              | 3.61.E+06              | 3.25.E+06              | 3.43.E+06              |
| 2552 | P23141    | Liver carboxylesterase 1 [OS=Homo sapiens]                                                        | 3.0           | 5            | 1          | 8      | 1                 | 24                      | 2                               | 1                                            | 1                                        | 0                |                    |                    |                    |                    |                        | 2.91.E+05              | 2.72.E+06              | 3.73.E+05              |
| 2553 | Q9UGT4    | Sushi domain-containing protein 2 [OS=Homo sapiens]                                               | 3.0           | 4            | 1          | 4      | 1                 | 35                      | 0                               | 1                                            | 1                                        | 0                |                    |                    |                    |                    |                        | 3.76.E+06              |                        | 3.16.E+06              |
| 2554 | P42696    | RNA-binding protein 34 [OS=Homo sapiens]                                                          | 3.0           | 2            | 1          | 4      | 1                 | 40                      | 4                               | 1                                            | 1                                        | 0                | 2.02.E+07          |                    | 2.34.E+07          |                    |                        |                        |                        |                        |
| 2555 | Q9Y394    | Dehydrogenase/reductase SDR family member 7 [OS=Homo sapiens]                                     | 3.0           | 7            | 1          | 14     | 1                 | 71                      | 0                               | 1                                            | 1                                        | 0                | 5.53.E+06          | 3.07.E+06          | 5.48.E+06          | 4.32.E+06          | 3.73.E+06              | 3.19.E+06              | 2.92.E+06              | 3.62.E+06              |
| 2556 | Q8IY22-1  | C-Maf-inducing protein [OS=Homo sapiens]                                                          | 3.0           | 4            | 1          | 6      | 1                 | 64                      | 0                               | 1                                            | 1                                        | 0                | 1.04.E+07          | 1.07.E+07          | 1.01.E+07          | 1.15.E+07          | 2.52.E+06              | 1.04.E+07              | 2.66.E+06              | 3.26.E+06              |
| 2557 | Q96AX1    | Vacuolar protein sorting-associated protein 33A [OS=Homo sapiens]                                 | 3.0           | 2            | 1          | 4      | 1                 | 37                      | 0                               | 1                                            | 1                                        | 0                | 6.06.E+06          | 5.30.E+06          | 6.31.E+06          | 5.33.E+06          | 4.78.E+06              | 6.75.E+06              | 6.87.E+06              | 6.78.E+06              |
| 2558 | Q9BV79    | Enoyl-[acyl-carrier-protein] reductase, mitochondrial [OS=Homo sapiens]                           | 3.0           | 3            | 1          | 2      | 1                 | 18                      | 2                               | 1                                            | 1                                        | 0                | 2.18.E+06          | 1.96.E+06          | 1.69.E+06          | 1.71.E+06          | 2.83.E+06              | 2.46.E+06              | 2.05.E+06              | 3.01.E+06              |
| 2559 | O75934    | Pre-mRNA-splicing factor spf27 [OS=Homo sapiens]                                                  | 2.9           | 6            | 1          | 5      | 1                 | 14                      | 7                               | 1                                            | 1                                        | 0                |                    | 9.85.E+06          | 1.48.E+07          | 1.30.E+07          |                        |                        | 6.61.E+07              | 1.63.E+07              |
| 2560 | Q9H2P0    | Activity-dependent neuroprotector homeobox protein [OS=Homo sapiens]                              | 2.9           | 1            | 1          | 2      | 1                 | 0                       | 0                               | 1                                            | 1                                        | 0                | 1.61.E+07          | 1.44.E+07          | 1.45.E+07          | 1.62.E+07          | 1.63.E+07              | 1.61.E+07              | 1.78.E+07              | 1.64.E+07              |
| 2561 | Q6P4A7-1  | Sideroflexin-4 [OS=Homo sapiens]                                                                  | 2.9           | 4            | 1          | 2      | 1                 | 17                      | 0                               | 1                                            | 1                                        | 0                |                    |                    |                    |                    |                        |                        |                        |                        |
| 2562 | O96011-1  | Peroxisomal membrane protein 11B [OS=Homo sapiens]                                                | 2.9           | 4            | 1          | 2      | 1                 | 0                       | 0                               | 1                                            | 1                                        | 0                | 9.14.E+06          | 8.74.E+06          | 8.37.E+06          | 6.53.E+06          | 7.71.E+06              | 1.13.E+07              | 9.48.E+06              | 8.28.E+06              |
| 2563 | A6NIH7    | Protein unc-119 homolog B [OS=Homo sapiens]                                                       | 2.9           | 4            | 1          | 2      | 1                 | 0                       | 2                               | 1                                            | 1                                        | 0                |                    |                    |                    | 5.53.E+06          | 1.77.E+06              | 9.08.E+06              |                        | 6.31.E+06              |
| 2564 | Q9Y3Q3    | Transmembrane emp24 domain-containing protein 3 [OS=Homo sapiens]                                 | 2.9           | 6            | 1          | 4      | 1                 | 0                       | 0                               | 1                                            | 1                                        | 0                | 8.73.E+06          | 9.16.E+06          | 1.03.E+07          | 1.16.E+07          | 1.26.E+07              | 1.16.E+07              | 1.43.E+07              | 1.18.E+07              |
| 2565 | Q2NL68-1  | Proline and serine-rich protein 3 [OS=Homo sapiens]                                               | 2.9           | 4            | 1          | 48     | 1                 | 0                       | 0                               | 1                                            | 1                                        | 0                | 1.41.E+08          | 1.54.E+08          | 1.23.E+08          | 1.38.E+08          | 2.13.E+08              | 2.20.E+08              | 1.96.E+08              | 2.21.E+08              |
| 2566 | O60830-1  | Mitochondrial import inner membrane translocase subunit Tim17-B [OS=Homo sapiens]                 | 2.9           | 13           | 1          | 2      | 1                 | 14                      | 3                               | 1                                            | 1                                        | 0                | 1.35.E+07          | 1.26.E+07          |                    | 1.54.E+07          | 1.51.E+07              | 1.38.E+07              | 1.22.E+07              | 1.25.E+07              |
| 2567 | Q12768    | WASH complex subunit 5 [OS=Homo sapiens]                                                          | 2.9           | 2            | 1          | 2      | 1                 | 29                      | 0                               | 1                                            | 1                                        | 0                | 4.18.E+06          | 4.26.E+06          |                    |                    | 3.30.E+06              | 2.35.E+06              | 2.24.E+06              | 2.48.E+06              |
| 2568 | Q9UNN5-1  | fas-associated factor 1 [OS=Homo sapiens]                                                         | 2.9           | 2            | 1          | 4      | 1                 | 0                       | 0                               | 1                                            | 1                                        | 0                | 1.11.E+07          | 1.33.E+07          | 9.54.E+06          | 1.10.E+07          | 8.58.E+06              | 7.19.E+06              | 6.96.E+06              | 7.60.E+06              |
| 2569 | Q3ZAQ7    | Vacuolar ATPase assembly integral membrane protein vma21 [OS=Homo sapiens]                        | 2.8           | 12           | 1          | 2      | 1                 | 32                      | 2                               | 1                                            | 1                                        | 0                |                    |                    |                    |                    |                        |                        |                        |                        |
| 2570 | O94903    | Pyridoxal phosphate homeostasis protein [OS=Homo sapiens]                                         | 2.8           | 5            | 1          | 2      | 1                 | 0                       | 2                               | 1                                            | 1                                        | 0                |                    |                    |                    |                    |                        |                        |                        |                        |
| 2571 | A8MXV4    | nucleoside diphosphate-linked moiety X motif 19 [OS=Homo sapiens]                                 | 2.8           | 3            | 1          | 2      | 1                 | 0                       | 0                               | 1                                            | 1                                        | 0                | 8.28.E+06          | 7.72.E+06          | 1.26.E+07          | 9.61.E+06          | 3.38.E+06              | 6.37.E+06              | 5.23.E+06              |                        |
| 2572 | P41743    | Protein kinase c iota type [OS=Homo sapiens]                                                      | 2.8           | 5            | 1          | 8      | 1                 | 18                      | 0                               | 1                                            | 1                                        | 0                | 1.29.E+07          | 1.80.E+07          | 1.18.E+07          | 1.66.E+07          | 1.91.E+07              | 1.14.E+07              | 1.14.E+07              | 1.30.E+07              |
| 2573 | O15213    | WD repeat-containing protein 46 [OS=Homo sapiens]                                                 | 2.8           | 3            | 1          | 3      | 1                 | 0                       | 2                               | 1                                            | 1                                        | 0                | 1.50.E+07          | 1.67.E+07          | 1.56.E+07          | 1.68.E+07          | 2.76.E+07              | 2.89.E+07              | 2.55.E+07              | 2.56.E+07              |
| 2574 | Q8WW59    | SPRY domain-containing protein 4 [OS=Homo sapiens]                                                | 2.8           | 5            | 1          | 10     | 1                 | 0                       | 0                               | 1                                            | 1                                        | 0                | 1.10.E+07          | 9.97.E+06          | 1.23.E+07          | 1.16.E+07          | 9.42.E+06              | 8.64.E+06              | 1.02.E+07              | 9.55.E+06              |
| 2575 | P82663    | 28S ribosomal protein S25, mitochondrial [OS=Homo sapiens]                                        | 2.8           | 8            | 1          | 4      | 1                 | 14                      | 0                               | 1                                            | 1                                        | 0                | 1.28.E+07          | 1.29.E+07          | 1.13.E+07          | 1.35.E+07          | 1.51.E+07              | 1.19.E+07              | 1.47.E+07              | 9.34.E+06              |
| 2576 | Q9UI42-1  | Carboxypeptidase A4 [OS=Homo sapiens]                                                             | 2.8           | 6            | 1          | 8      | 1                 | 20                      | 0                               | 1                                            | 1                                        | 0                | 2.90.E+06          | 9.67.E+05          | 2.44.E+06          | 3.10.E+05          |                        | 1.62.E+06              |                        |                        |
| 2577 | Q5T8D3-1  | Acyl-CoA-binding domain-containing protein 5 [OS=Homo sapiens]                                    | 2.8           | 2            | 1          | 4      | 1                 | 0                       | 2                               | 1                                            | 1                                        | 0                | 1.86.E+07          | 2.20.E+07          | 1.27.E+07          | 1.27.E+07          | 2.30.E+07              | 1.66.E+07              | 1.87.E+07              | 1.58.E+07              |
| 2578 | O95972    | Bone morphogenetic protein 15 [OS=Homo sapiens]                                                   | 2.8           | 2            | 1          | 44     | 1                 | 728                     | 0                               | 1                                            | 1                                        | 0                | 8.87.E+07          | 7.32.E+07          | 8.85.E+07          | 1.04.E+08          | 6.94.E+07              | 7.43.E+07              | 1.00.E+08              | 7.34.E+07              |
| 2579 | Q12929    | Epidermal growth factor receptor kinase substrate 8 [OS=Homo sapiens]                             | 2.8           | 2            | 1          | 4      | 1                 | 35                      | 0                               | 1                                            | 1                                        | 0                | 4.42.E+06          | 5.89.E+06          | 4.83.E+06          |                    | 4.70.E+06              | 6.04.E+06              | 3.66.E+06              | 4.25.E+06              |
| 2580 | Q15392    | Delta(24)-sterol reductase [OS=Homo sapiens]                                                      | 2.8           | 2            | 1          | 6      | 1                 | 14                      | 6                               | 1                                            | 1                                        | 0                | 4.20.E+07          | 4.59.E+07          | 5.08.E+07          | 3.93.E+07          | 5.63.E+07              | 5.80.E+07              | 6.51.E+07              | 5.93.E+07              |
| 2581 | Q99570    | Phosphoinositide 3-kinase regulatory subunit 4 [OS=Homo sapiens]                                  | 2.8           | 1            | 1          | 2      | 1                 | 20                      | 0                               | 1                                            | 1                                        | 0                | 1.54.E+06          | 1.72.E+06          | 9.92.E+05          | 1.54.E+06          | 1.62.E+06              | 1.33.E+06              | 1.03.E+06              | 1.45.E+06              |
| 2582 | Q02338    | D-beta-hydroxybutyrate dehydrogenase, mitochondrial [OS=Homo sapiens]                             | 2.8           | 2            | 1          | 10     | 1                 | 49                      | 0                               | 1                                            | 1                                        | 0                | 1.61.E+07          | 1.76.E+07          | 1.62.E+07          | 1.44.E+07          | 7.19.E+06              | 7.41.E+06              | 6.41.E+06              | 6.66.E+06              |
| 2583 | Q02083    | N-acylethanolamine-hydrolyzing acid amidase [OS=Homo sapiens]                                     | 2.8           | 5            | 1          | 7      | 1                 | 16                      | 0                               | 1                                            | 1                                        | 0                | 4.33.E+06          | 3.23.E+06          | 1.07.E+08          | 2.24.E+06          | 5.45.E+07              | 5.88.E+06              | 4.95.E+07              | 3.07.E+07              |
| 2584 | P45877    | peptidyl-prolyl cis-trans isomerase C [OS=Homo sapiens]                                           | 2.8           | 4            | 1          | 56     | 1                 | 296                     | 26                              | 1                                            | 1                                        | 0                | 8.97.E+07          | 9.46.E+07          | 9.29.E+07          | 7.76.E+07          | 8.61.E+07              | 9.50.E+07              | 9.16.E+07              | 8.79.E+07              |
| 2585 | O15427    | Monocarboxylate transporter 4 [OS=Homo sapiens]                                                   | 2.8           | 3            | 1          | 4      | 1                 | 18                      | 0                               | 1                                            | 1                                        | 0                |                    |                    |                    | 7.58.E+06          | 7.50.E+06              | 7.64.E+06              | 7.51.E+06              |                        |
| 2586 | Q96ER3    | protein saal1 [OS=Homo sapiens]                                                                   | 2.8           | 2            | 1          | 4      | 1                 | 41                      | 0                               | 1                                            | 1                                        | 0                | 2.59.E+06          | 3.05.E+06          |                    | 3.91.E+06          | 1.15.E+07              | 9.40.E+06              | 8.57.E+06              | 9.29.E+06              |
| 2587 | Q30201-1  | Hereditary hemochromatosis protein [OS=Homo sapiens]                                              | 2.8           | 4            | 1          | 2      | 1                 | 13                      | 0                               | 1                                            | 1                                        | 0                | 1.24.E+06          | 1.10.E+06          | 1.28.E+06          | 9.36.E+05          | 2.51.E+06              | 2.85.E+06              | 3.21.E+06              | 3.06.E+06              |
| 2588 | Q13671    | ras and Rab interactor 1 [OS=Homo sapiens]                                                        | 2.8           | 1            | 1          | 4      | 1                 | 37                      | 0                               | 1                                            | 1                                        | 0                | 5.06.E+06          | 5.77.E+06          | 4.34.E+06          | 5.29.E+06          | 6.20.E+06              | 7.49.E+06              | 6.27.E+06              | 6.92.E+06              |
| 2589 | O15294    | UDP-N-acetylglucosamine-peptide N-acetylglucosaminyltransferase 110 kDa subunit [OS=Homo sapiens] | 2.8           | 2            | 1          | 2      | 1                 | 32                      | 0                               | 1                                            | 1                                        | 0                | 4.52.E+06          | 4.79.E+06          | 1.83.E+06          | 5.03.E+06          | 3.86.E+06              | 4.16.E+06              | 2.54.E+06              | 4.57.E+06              |
| 2590 | O43541-1  | mothers against decapentaplegic homolog 6 [OS=Homo sapiens]                                       | 2.8           | 3            | 1          | 6      | 1                 | 0                       | 0                               | 1                                            | 1                                        | 0                |                    |                    |                    |                    |                        |                        |                        |                        |
| 2591 | Q9H6Z4    | Ran-binding protein 3 [OS=Homo sapiens]                                                           | 2.8           | 4            | 1          | 1      | 1                 | 0                       |                                 |                                              |                                          | 0                | 2.65.E+06          | 5.77.E+06          | 5.04.E+06          | 9.34.E+06          | 7.17.E+06              | 8.01.E+06              | 1.18.E+07              | 1.30.E+07              |

| No.  | Accession | Description                                                                                                                    | Sum PEP Score | Coverage [%] | # Peptides | # PSMs | # Unique Peptides | Score Mascot: A5 Mascot | Score Sequest HT: A2 Sequest HT | # Peptides (by Search Engine): A2 Sequest HT | # Peptides (by Search Engine): A5 Mascot | # Razor Peptides | ctrl Abundance s_1 | ctrl Abundance s_2 | ctrl Abundance s_3 | ctrl Abundance s_4 | JAM-A KO Abundance s_1 | JAM-A KO Abundance s_2 | JAM-A KO Abundance s_3 | JAM-A KO Abundance s_4 |
|------|-----------|--------------------------------------------------------------------------------------------------------------------------------|---------------|--------------|------------|--------|-------------------|-------------------------|---------------------------------|----------------------------------------------|------------------------------------------|------------------|--------------------|--------------------|--------------------|--------------------|------------------------|------------------------|------------------------|------------------------|
| 2592 | Q9Y263    | Phospholipase A-2-activating protein [OS=Homo sapiens]                                                                         | 2.8           | 2            | 1          | 2      | 1                 | 31                      | 0                               | 1                                            | 1                                        | 0                |                    |                    |                    |                    |                        |                        |                        |                        |
| 2593 | Q92733    | proline-rich protein PRCC [OS=Homo sapiens]                                                                                    | 2.8           | 2            | 1          | 26     | 1                 | 14                      | 0                               | 1                                            | 1                                        | 0                | 1.99.E+07          | 1.93.E+07          | 2.16.E+07          | 1.74.E+07          | 1.75.E+07              | 1.67.E+07              | 1.90.E+07              | 1.76.E+07              |
| 2594 | Q6ZNW5    | GDP-D-glucose phosphorylase 1 [OS=Homo sapiens]                                                                                | 2.7           | 4            | 1          | 2      | 1                 | 21                      | 0                               | 1                                            | 1                                        | 0                | 1.54.E+06          | 7.68.E+05          |                    |                    | 3.03.E+06              | 2.22.E+06              | 2.07.E+06              | 2.10.E+06              |
| 2595 | P38571    | lysosomal acid lipase/cholesteryl ester hydrolase [OS=Homo sapiens]                                                            | 2.7           | 4            | 1          | 4      | 1                 | 0                       | 0                               | 1                                            | 1                                        | 0                | 2.83.E+05          | 4.28.E+05          | 2.64.E+05          | 5.83.E+05          | 9.72.E+06              | 6.66.E+06              | 9.35.E+06              | 1.03.E+07              |
| 2596 | Q8N543    | prolyl 3-hydroxylase OGFOD1 [OS=Homo sapiens]                                                                                  | 2.7           | 4            | 1          | 2      | 1                 | 0                       | 0                               | 1                                            | 1                                        | 0                | 1.34.E+07          |                    |                    | 1.21.E+07          |                        |                        |                        |                        |
| 2597 | Q9Y5X1    | Sorting nexin-9 [OS=Homo sapiens]                                                                                              | 2.7           | 2            | 1          | 2      | 1                 | 0                       | 0                               | 1                                            | 1                                        | 0                | 5.32.E+06          | 6.46.E+06          | 6.63.E+06          | 6.10.E+06          | 8.87.E+06              | 8.23.E+06              | 4.46.E+06              | 8.08.E+06              |
| 2598 | Q9H9A6    | Leucine-rich repeat-containing protein 40 [OS=Homo sapiens]                                                                    | 2.7           | 1            | 1          | 4      | 1                 | 45                      | 0                               | 1                                            | 1                                        | 0                | 7.27.E+06          | 5.82.E+06          | 7.03.E+06          | 5.54.E+06          | 9.90.E+06              | 9.40.E+06              | 8.82.E+06              | 9.97.E+06              |
| 2599 | P51948-1  | CDK-activating kinase assembly factor MAT1 [OS=Homo sapiens]                                                                   | 2.7           | 7            | 1          | 2      | 1                 | 15                      | 0                               | 1                                            | 1                                        | 0                | 3.27.E+06          | 2.95.E+06          | 2.75.E+06          | 2.48.E+06          | 5.19.E+06              | 4.35.E+06              | 3.66.E+06              | 3.39.E+06              |
| 2600 | Q8N3D4    | EH domain-binding protein 1-like protein 1 [OS=Homo sapiens]                                                                   | 2.7           | 1            | 1          | 2      | 1                 | 18                      | 0                               | 1                                            | 1                                        | 0                | 2.49.E+06          | 2.05.E+06          | 2.11.E+06          | 2.44.E+06          | 1.58.E+06              | 1.46.E+06              | 1.35.E+06              | 1.24.E+06              |
| 2601 | Q15005    | Signal peptidase complex subunit 2 [OS=Homo sapiens]                                                                           | 2.7           | 3            | 1          | 40     | 1                 | 69                      | 22                              | 1                                            | 1                                        | 0                | 7.37.E+07          | 6.32.E+07          | 8.09.E+07          | 7.90.E+07          | 8.96.E+07              | 7.17.E+07              | 8.09.E+07              | 7.63.E+07              |
| 2602 | Q9P016    | Thymocyte nuclear protein 1 [OS=Homo sapiens]                                                                                  | 2.7           | 3            | 1          | 2      | 1                 | 0                       | 0                               | 1                                            | 1                                        | 0                | 1.33.E+07          | 1.45.E+07          | 1.36.E+07          | 1.38.E+07          | 1.88.E+07              | 1.83.E+07              | 2.08.E+07              | 1.74.E+07              |
| 2603 | A6NCW0    | Ubiquitin carboxyl-terminal hydrolase 17-like protein 3 [OS=Homo sapiens]                                                      | 2.7           | 1            | 1          | 13     | 1                 | 0                       | 0                               | 1                                            | 1                                        | 0                |                    |                    |                    |                    |                        |                        |                        |                        |
| 2604 | O60645    | exocyst complex component 3 [OS=Homo sapiens]                                                                                  | 2.7           | 2            | 1          | 2      | 1                 | 16                      | 0                               | 1                                            | 1                                        | 0                |                    |                    |                    |                    |                        |                        |                        |                        |
| 2605 | O95801    | Tetratricopeptide repeat protein 4 [OS=Homo sapiens]                                                                           | 2.7           | 6            | 1          | 2      | 1                 | 0                       | 0                               | 1                                            | 1                                        | 0                | 7.08.E+06          | 1.02.E+07          |                    | 1.15.E+07          |                        |                        | 2.97.E+06              |                        |
| 2606 | P29558-1  | RNA-binding motif, single-stranded-interacting protein 1 [OS=Homo sapiens]                                                     | 2.7           | 4            | 1          | 4      | 1                 | 15                      | 4                               | 1                                            | 1                                        | 0                | 1.38.E+07          | 1.30.E+07          | 1.18.E+07          | 1.15.E+07          | 1.08.E+07              | 9.41.E+06              | 1.33.E+07              | 1.34.E+07              |
| 2607 | Q9UM54-3  | Unconventional myosin-VI [OS=Homo sapiens]                                                                                     | 2.7           | 2            | 1          | 5      | 1                 | 15                      |                                 |                                              | 1                                        | 0                |                    |                    |                    |                    |                        | 6.91.E+05              | 1.41.E+07              | 7.44.E+05              |
| 2608 | Q9NX46    | Poly(ADP-ribose) glycohydrolase ARH3 [OS=Homo sapiens]                                                                         | 2.7           | 2            | 1          | 1      | 1                 |                         | 0                               | 1                                            | 0                                        | 0                | 1.48.E+07          | 1.53.E+07          | 1.49.E+07          | 1.25.E+07          | 1.75.E+07              | 1.73.E+07              | 1.85.E+07              | 1.66.E+07              |
| 2609 | Q9UBM7    | 7-dehydrocholesterol reductase [OS=Homo sapiens]                                                                               | 2.7           | 1            | 1          | 2      | 1                 | 0                       | 0                               | 1                                            | 1                                        | 0                | 3.36.E+07          | 3.06.E+07          | 3.32.E+07          | 3.91.E+07          | 3.65.E+07              | 3.19.E+07              | 3.34.E+07              | 3.69.E+07              |
| 2610 | Q3ZCW2    | Galectin-related protein [OS=Homo sapiens]                                                                                     | 2.7           | 6            | 1          | 1      | 1                 |                         | 0                               | 1                                            | 0                                        | 0                | 1.04.E+07          | 8.27.E+06          | 8.79.E+06          | 7.75.E+06          | 8.55.E+06              | 9.53.E+06              | 9.18.E+06              | 7.89.E+06              |
| 2611 | P31749    | RAC-alpha serine/threonine-protein kinase [OS=Homo sapiens]                                                                    | 2.7           | 4            | 1          | 2      | 1                 | 0                       | 0                               | 1                                            | 1                                        | 0                | 2.44.E+06          | 6.15.E+06          | 5.79.E+06          | 3.75.E+06          | 4.24.E+06              | 4.02.E+06              | 4.46.E+06              | 7.16.E+06              |
| 2612 | Q32P28-1  | Prolyl 3-hydroxylase 1 [OS=Homo sapiens]                                                                                       | 2.7           | 1            | 1          | 5      | 1                 | 26                      | 0                               | 1                                            | 1                                        | 0                | 5.38.E+06          | 2.98.E+06          | 4.45.E+06          | 2.11.E+06          |                        |                        | 3.30.E+06              | 3.43.E+05              |
| 2613 | P25098    | Beta-adrenergic receptor kinase 1 [OS=Homo sapiens]                                                                            | 2.7           | 1            | 1          | 6      | 1                 | 26                      | 2                               | 1                                            | 1                                        | 0                | 1.06.E+07          | 9.57.E+06          | 1.03.E+07          | 7.43.E+06          | 9.28.E+06              | 1.13.E+07              | 8.47.E+06              | 1.04.E+07              |
| 2614 | Q9P2W9    | Syntaxin-18 [OS=Homo sapiens]                                                                                                  | 2.7           | 4            | 1          | 2      | 1                 | 22                      | 0                               | 1                                            | 1                                        | 0                | 2.38.E+06          | 2.52.E+06          | 2.52.E+06          | 2.06.E+06          | 2.46.E+06              | 2.30.E+06              | 2.07.E+06              | 2.82.E+06              |
| 2615 | Q9H4L7    | SWI/SNF-related matrix-associated actin-dependent regulator of chromatin subfamily A containing DEAD/H box 1 [OS=Homo sapiens] | 2.7           | 1            | 1          | 2      | 1                 | 14                      | 0                               | 1                                            | 1                                        | 0                | 5.90.E+06          | 5.96.E+06          | 5.13.E+06          | 6.64.E+06          | 6.23.E+06              | 5.34.E+06              | 5.48.E+06              | 5.68.E+06              |
| 2616 | O60783    | 28S ribosomal protein S14, mitochondrial [OS=Homo sapiens]                                                                     | 2.7           | 10           | 1          | 2      | 1                 | 16                      | 0                               | 1                                            | 1                                        | 0                | 8.16.E+06          | 7.68.E+06          | 9.59.E+06          | 9.69.E+06          | 7.65.E+06              | 7.15.E+06              | 7.82.E+06              | 7.13.E+06              |
| 2617 | Q9NUQ7    | Ufm1-specific protease 2 [OS=Homo sapiens]                                                                                     | 2.7           | 4            | 1          | 2      | 1                 | 0                       | 2                               | 1                                            | 1                                        | 0                |                    |                    |                    |                    |                        |                        |                        |                        |
| 2618 | Q15024    | Exosome complex component RRP42 [OS=Homo sapiens]                                                                              | 2.6           | 4            | 1          | 5      | 1                 | 0                       | 0                               | 1                                            | 1                                        | 0                | 1.09.E+07          | 8.72.E+06          | 9.99.E+06          | 1.14.E+07          | 1.14.E+07              | 1.03.E+07              | 1.34.E+07              | 1.31.E+07              |
| 2619 | O95563    | Mitochondrial pyruvate carrier 2 [OS=Homo sapiens]                                                                             | 2.6           | 9            | 1          | 10     | 1                 | 0                       | 2                               | 1                                            | 1                                        | 0                | 1.09.E+07          | 9.13.E+06          | 1.10.E+07          | 1.07.E+07          | 7.67.E+06              | 7.89.E+06              | 1.03.E+07              | 7.52.E+06              |
| 2620 | LOR6Q1    | SLC35A4 upstream open reading frame protein [OS=Homo sapiens]                                                                  | 2.6           | 10           | 1          | 8      | 1                 | 15                      | 4                               | 1                                            | 1                                        | 0                | 1.30.E+07          | 1.51.E+07          | 1.31.E+07          | 1.55.E+07          | 6.19.E+06              | 7.99.E+06              | 8.20.E+06              | 1.05.E+07              |
| 2621 | Q8NBX0    | saccharopine dehydrogenase-like oxidoreductase [OS=Homo sapiens]                                                               | 2.6           | 3            | 1          | 4      | 1                 | 0                       | 2                               | 1                                            | 1                                        | 0                | 1.63.E+07          | 1.59.E+07          | 1.63.E+07          |                    | 2.72.E+07              | 2.86.E+07              | 3.24.E+07              | 3.27.E+07              |
| 2622 | P54578    | Ubiquitin carboxyl-terminal hydrolase 14 [OS=Homo sapiens]                                                                     | 2.6           | 2            | 1          | 5      | 1                 | 0                       | 0                               | 1                                            | 1                                        | 0                |                    |                    |                    |                    |                        |                        |                        |                        |
| 2623 | Q9H0W9    | Ester hydrolase C11orf54 [OS=Homo sapiens]                                                                                     | 2.6           | 5            | 1          | 6      | 1                 | 23                      | 7                               | 1                                            | 1                                        | 0                | 1.09.E+07          | 1.43.E+07          | 1.02.E+07          | 1.32.E+07          | 2.13.E+07              | 2.11.E+07              | 1.97.E+07              | 2.09.E+07              |
| 2624 | O75127    | pentatricopeptide repeat-containing protein 1, mitochondrial [OS=Homo sapiens]                                                 | 2.6           | 2            | 1          | 6      | 1                 | 20                      | 0                               | 1                                            | 1                                        | 0                |                    | 3.10.E+06          |                    | 4.09.E+06          | 3.71.E+06              | 3.75.E+06              | 2.52.E+06              | 1.62.E+06              |
| 2625 | Q99417    | C-Myc-binding protein [OS=Homo sapiens]                                                                                        | 2.6           | 11           | 1          | 23     | 1                 | 28                      | 9                               | 1                                            | 1                                        | 0                | 1.00.E+07          | 9.13.E+06          | 8.95.E+06          | 1.01.E+07          | 1.16.E+07              | 1.02.E+07              | 1.21.E+07              | 1.18.E+07              |
| 2626 | Q96GA7    | serine dehydratase-like [OS=Homo sapiens]                                                                                      | 2.6           | 8            | 1          | 2      | 1                 | 20                      | 0                               | 1                                            | 1                                        | 0                |                    |                    |                    |                    |                        |                        |                        |                        |
| 2627 | Q14118    | Dystroglycan [OS=Homo sapiens]                                                                                                 | 2.6           | 3            | 1          | 2      | 1                 | 19                      | 0                               | 1                                            | 1                                        | 0                | 2.61.E+06          | 2.53.E+06          | 3.12.E+06          | 2.84.E+06          | 7.58.E+06              | 5.69.E+06              |                        | 6.21.E+06              |
| 2628 | O15235    | 28S ribosomal protein S12, mitochondrial [OS=Homo sapiens]                                                                     | 2.6           | 9            | 1          | 14     | 1                 | 15                      | 0                               | 1                                            | 1                                        | 0                | 3.61.E+06          | 4.13.E+06          | 3.55.E+06          | 3.60.E+06          | 2.74.E+06              | 2.47.E+06              | 2.38.E+06              | 2.11.E+06              |
| 2629 | Q8N8E3    | Centrosomal protein of 112 kDa [OS=Homo sapiens]                                                                               | 2.6           | 2            | 1          | 8      | 1                 |                         | 0                               | 1                                            | 1                                        | 0                | 1.40.E+06          | 1.88.E+06          | 1.58.E+06          | 1.23.E+06          | 1.89.E+06              | 2.51.E+06              | 2.05.E+06              | 2.06.E+06              |
| 2630 | Q9BX95    | Sphingosine-1-phosphate phosphatase 1 [OS=Homo sapiens]                                                                        | 2.6           | 4            | 1          | 15     | 1                 | 0                       | 0                               | 1                                            | 1                                        | 0                | 4.50.E+06          | 4.41.E+06          | 5.14.E+06          | 3.86.E+06          | 5.50.E+06              | 6.01.E+06              | 5.75.E+06              | 5.90.E+06              |
| 2631 | Q92797-1  | Symplekin [OS=Homo sapiens]                                                                                                    | 2.6           | 3            | 1          | 2      | 1                 | 0                       | 0                               | 1                                            | 1                                        | 0                |                    |                    |                    |                    |                        |                        |                        |                        |
| 2632 | Q9H4H8    | Protein FAM83D [OS=Homo sapiens]                                                                                               | 2.5           | 2            | 1          | 4      | 1                 | 0                       | 0                               | 1                                            | 1                                        | 0                |                    |                    |                    |                    |                        |                        |                        |                        |
| 2633 | Q9H6F5    | Coiled-coil domain-containing protein 86 [OS=Homo sapiens]                                                                     | 2.5           | 6            | 1          | 2      | 1                 | 15                      | 0                               | 1                                            | 1                                        | 0                | 8.01.E+06          | 5.19.E+06          | 8.60.E+06          | 8.35.E+06          | 4.32.E+06              | 5.02.E+06              | 7.58.E+06              | 3.50.E+06              |
| 2634 | O15050    | TPR and ankyrin repeat-containing protein 1 [OS=Homo sapiens]                                                                  | 2.5           | 0            | 1          | 26     | 1                 | 101                     | 5                               | 1                                            | 1                                        | 0                | 1.25.E+08          | 1.26.E+08          | 1.11.E+08          | 1.00.E+08          | 1.02.E+08              | 8.37.E+07              | 1.14.E+08              | 1.12.E+08              |
| 2635 | Q9NTM9    | Copper homeostasis protein cutC homolog [OS=Homo sapiens]                                                                      | 2.5           | 4            | 1          | 11     | 1                 | 0                       | 12                              | 1                                            | 1                                        | 0                |                    | 1.44.E+07          | 1.55.E+07          |                    | 1.32.E+07              | 1.28.E+07              | 1.05.E+07              | 1.55.E+07              |
| 2636 | Q14966-1  | Zinc finger protein 638 [OS=Homo sapiens]                                                                                      | 2.5           | 1            | 1          | 2      | 1                 | 0                       | 0                               | 1                                            | 1                                        | 0                | 3.81.E+06          | 3.39.E+06          | 3.24.E+06          | 3.31.E+06          | 3.03.E+06              | 2.96.E+06              | 3.61.E+06              | 3.41.E+06              |
| 2637 | O95721    | Synaptosomal-associated protein 29 [OS=Homo sapiens]                                                                           | 2.5           | 5            | 1          | 2      | 1                 | 0                       | 0                               | 1                                            | 1                                        | 0                | 7.34.E+06          | 5.85.E+06          | 7.42.E+06          | 9.74.E+06          |                        |                        | 5.99.E+06              |                        |
| 2638 | O75165    | DnaJ homolog subfamily C member 13 [OS=Homo sapiens]                                                                           | 2.5           | 1            | 1          | 6      | 1                 | 0                       | 4                               | 1                                            | 1                                        | 0                | 5.50.E+06          | 6.43.E+06          | 2.03.E+07          | 7.44.E+06          | 6.69.E+06              | 2.06.E+07              | 1.62.E+07              | 1.59.E+07              |
| 2639 | Q9H490    | Phosphatidylinositol glycan anchor biosynthesis class U protein [OS=Homo sapiens]                                              | 2.5           | 4            | 1          | 4      | 1                 | 32                      | 0                               | 1                                            | 1                                        | 0                | 3.15.E+06          | 2.81.E+06          | 5.06.E+06          | 3.67.E+06          | 1.80.E+06              | 1.40.E+06              | 5.15.E+06              |                        |
| 2640 | O75665    | Oral-facial-digital syndrome 1 protein [OS=Homo sapiens]                                                                       | 2.5           | 1            | 1          | 6      | 1                 | 39                      |                                 |                                              | 1                                        | 0                |                    |                    |                    |                    |                        |                        |                        |                        |
| 2641 | Q9C0J8    | pre-mRNA 3' end processing protein WDR33 [OS=Homo sapiens]                                                                     | 2.5           | 1            | 1          | 13     | 1                 | 0                       | 0                               | 1                                            | 1                                        | 0                | 8.14.E+05          | 1.21.E+06          | 9.67.E+05          | 7.25.E+05          | 9.81.E+05              | 1.30.E+06              | 1.02.E+06              | 9.63.E+05              |
| 2642 | Q9BVG4    | Protein PBDC1 [OS=Homo sapiens]                                                                                                | 2.4           | 4            | 1          | 2      | 1                 | 15                      | 2                               | 1                                            | 1                                        | 0                | 1.16.E+07          | 9.47.E+06          | 1.11.E+07          | 1.05.E+07          | 1.20.E+07              | 1.23.E+07              | 9.09.E+06              | 9.05.E+06              |

| No.  | Accession | Description                                                                                      | Sum PEP Score | Coverage [%] | # Peptides | # PSMs | # Unique Peptides | Score Mascot: A5 Mascot | Score Sequest HT: A2 Sequest HT | # Peptides (by Search Engine): A2 Sequest HT | # Peptides (by Search Engine): A5 Mascot | # Razor Peptides | ctrl Abundance s_1 | ctrl Abundance s_2 | ctrl Abundance s_3 | ctrl Abundance s_4 | JAM-A KO Abundance s_1 | JAM-A KO Abundance s_2 | JAM-A KO Abundance s_3 | JAM-A KO Abundance s_4 |
|------|-----------|--------------------------------------------------------------------------------------------------|---------------|--------------|------------|--------|-------------------|-------------------------|---------------------------------|----------------------------------------------|------------------------------------------|------------------|--------------------|--------------------|--------------------|--------------------|------------------------|------------------------|------------------------|------------------------|
| 2643 | Q13257-1  | Mitotic spindle assembly checkpoint protein MAD2A [OS=Homo sapiens]                              | 2.4           | 5            | 1          | 17     | 1                 | 0                       | 2                               | 1                                            | 1                                        | 0                | 3.06.E+07          | 3.16.E+07          | 3.20.E+07          | 2.74.E+07          | 3.11.E+07              | 3.13.E+07              | 3.45.E+07              | 3.38.E+07              |
| 2644 | Q9Y324    | rRNA-processing protein FCF1 homolog [OS=Homo sapiens]                                           | 2.4           | 6            | 1          | 2      | 1                 | 0                       | 0                               | 1                                            | 1                                        | 0                | 4.28.E+06          | 5.18.E+06          | 5.73.E+06          | 6.65.E+06          | 4.76.E+06              | 5.29.E+06              | 5.22.E+06              | 5.65.E+06              |
| 2645 | Q96GM8    | Target of EGR1 protein 1 [OS=Homo sapiens]                                                       | 2.4           | 4            | 1          | 4      | 1                 | 21                      | 4                               | 1                                            | 1                                        | 0                | 1.77.E+07          | 1.85.E+07          | 1.59.E+07          | 2.06.E+07          | 3.01.E+07              | 2.92.E+07              | 2.59.E+07              | 2.16.E+07              |
| 2646 | P17735    | tyrosine aminotransferase [OS=Homo sapiens]                                                      | 2.4           | 2            | 1          | 35     | 1                 | 14                      | 0                               | 1                                            | 1                                        | 0                | 3.70.E+07          | 3.17.E+07          | 3.71.E+07          | 4.33.E+07          | 3.71.E+07              | 3.62.E+07              | 4.38.E+07              | 3.93.E+07              |
| 2647 | Q8WUA4-1  | General transcription factor 3C polypeptide 2 [OS=Homo sapiens]                                  | 2.4           | 1            | 1          | 2      | 1                 | 0                       | 0                               | 1                                            | 1                                        | 0                | 5.16.E+05          | 4.89.E+05          | 4.85.E+05          | 3.91.E+05          | 3.13.E+05              | 4.46.E+05              | 3.54.E+05              | 3.85.E+05              |
| 2648 | Q2Q1W2    | E3 ubiquitin-protein ligase TRIM71 [OS=Homo sapiens]                                             | 2.4           | 1            | 1          | 3      | 1                 | 0                       | 0                               | 1                                            | 1                                        | 0                |                    |                    |                    |                    |                        |                        |                        |                        |
| 2649 | Q9NR28-1  | Diablo homolog, mitochondrial [OS=Homo sapiens]                                                  | 2.4           | 5            | 1          | 2      | 1                 | 0                       | 2                               | 1                                            | 1                                        | 0                | 6.76.E+06          | 5.90.E+06          | 8.24.E+06          | 7.86.E+06          | 3.16.E+06              | 4.39.E+06              | 5.13.E+06              | 4.60.E+06              |
| 2650 | Q9BU14    | DNA-directed RNA polymerase III subunit RPC3 [OS=Homo sapiens]                                   | 2.4           | 3            | 1          | 2      | 1                 | 0                       | 0                               | 1                                            | 1                                        | 0                | 1.19.E+06          | 1.46.E+06          | 9.02.E+05          | 1.37.E+06          | 2.46.E+06              | 2.42.E+06              | 2.69.E+06              | 3.33.E+06              |
| 2651 | Q9GZU1    | Mucolipin-1 [OS=Homo sapiens]                                                                    | 2.4           | 4            | 1          | 2      | 1                 | 20                      | 0                               | 1                                            | 1                                        | 0                | 6.17.E+06          | 1.52.E+06          | 6.59.E+06          | 1.72.E+06          |                        | 1.38.E+06              |                        |                        |
| 2652 | Q96EE3    | nucleoporin Seh1 [OS=Homo sapiens]                                                               | 2.3           | 3            | 1          | 5      | 1                 | 0                       | 3                               | 1                                            | 1                                        | 0                |                    |                    |                    |                    |                        |                        |                        |                        |
| 2653 | P00813    | adenosine deaminase [OS=Homo sapiens]                                                            | 2.3           | 10           | 1          | 2      | 1                 | 18                      | 0                               | 1                                            | 1                                        | 0                | 5.64.E+06          | 4.83.E+06          | 5.34.E+06          | 6.07.E+06          | 3.36.E+06              |                        | 4.59.E+05              | 2.08.E+06              |
| 2654 | Q9NQR7    | Coiled-coil domain-containing protein 177 [OS=Homo sapiens]                                      | 2.3           | 1            | 1          | 24     | 1                 | 22                      | 17                              | 1                                            | 1                                        | 0                | 1.18.E+07          | 1.05.E+07          | 1.33.E+07          | 1.56.E+07          | 1.55.E+07              | 1.90.E+07              | 2.44.E+07              | 1.70.E+07              |
| 2655 | Q96HS1-1  | Serine/threonine-protein phosphatase Pgam5, mitochondrial [OS=Homo sapiens]                      | 2.3           | 2            | 1          | 18     | 1                 |                         | 0                               | 1                                            |                                          | 0                | 6.42.E+07          | 6.22.E+07          | 6.60.E+07          | 7.49.E+07          | 6.63.E+07              | 5.79.E+07              | 6.48.E+07              | 5.70.E+07              |
| 2656 | Q8TB61    | Adenosine 3'-phospho 5'-phosphosulfate transporter 1 [OS=Homo sapiens]                           | 2.3           | 5            | 1          | 7      | 1                 | 20                      | 0                               | 1                                            | 1                                        | 0                |                    |                    |                    |                    |                        |                        |                        |                        |
| 2657 | O94850    | Dendrin [OS=Homo sapiens]                                                                        | 2.3           | 3            | 1          | 10     | 1                 | 0                       |                                 |                                              | 1                                        | 0                | 9.33.E+05          | 9.14.E+05          | 9.39.E+05          | 7.68.E+05          | 8.77.E+05              | 1.01.E+06              | 7.95.E+05              | 1.01.E+06              |
| 2658 | Q8IUD2-1  | ELKS/Rab6-interacting/CAST family member 1 [OS=Homo sapiens]                                     | 2.3           | 1            | 1          | 15     | 1                 | 0                       | 2                               | 1                                            | 1                                        | 0                | 1.67.E+08          | 1.62.E+08          | 1.73.E+08          | 1.50.E+08          | 2.35.E+08              | 2.39.E+08              | 2.51.E+08              | 2.48.E+08              |
| 2659 | O43511    | pendrin [OS=Homo sapiens]                                                                        | 2.3           | 2            | 1          | 4      | 1                 | 0                       | 0                               | 1                                            | 1                                        | 0                | 1.58.E+06          | 2.02.E+06          | 2.70.E+06          | 1.55.E+06          | 1.03.E+07              | 9.83.E+06              | 9.30.E+06              | 1.12.E+07              |
| 2660 | Q9BYN8    | 28S ribosomal protein S26, mitochondrial [OS=Homo sapiens]                                       | 2.3           | 5            | 1          | 6      | 1                 | 15                      | 0                               | 1                                            | 1                                        | 0                | 9.87.E+06          | 1.00.E+07          | 9.08.E+06          | 2.03.E+07          | 8.37.E+06              | 9.04.E+06              | 1.47.E+07              | 8.93.E+06              |
| 2661 | P06756    | Integrin alpha-V [OS=Homo sapiens]                                                               | 2.3           | 2            | 1          | 2      | 1                 | 23                      | 0                               | 1                                            | 1                                        | 0                |                    |                    |                    |                    | 3.69.E+06              | 8.36.E+06              | 6.42.E+06              | 5.90.E+06              |
| 2662 | Q9H488-1  | GDP-fucose protein O-fucosyltransferase 1 [OS=Homo sapiens]                                      | 2.3           | 4            | 1          | 9      | 1                 | 0                       | 0                               | 1                                            | 1                                        | 0                |                    |                    |                    |                    |                        |                        |                        |                        |
| 2663 | Q99496    | E3 ubiquitin-protein ligase RING2 [OS=Homo sapiens]                                              | 2.3           | 3            | 1          | 1      | 1                 | 0                       |                                 |                                              | 1                                        | 0                |                    |                    | 1.13.E+07          |                    | 1.14.E+07              |                        | 1.43.E+07              | 1.34.E+07              |
| 2664 | Q8WWB7    | Glycosylated lysosomal membrane protein [OS=Homo sapiens]                                        | 2.3           | 5            | 1          | 2      | 1                 | 0                       | 0                               | 1                                            | 1                                        | 0                | 2.39.E+06          | 4.42.E+06          | 3.77.E+06          | 1.74.E+06          | 1.52.E+06              | 2.06.E+06              | 2.00.E+05              | 2.20.E+05              |
| 2665 | Q17RC7    | Exocyst complex component 3-like protein 4 [OS=Homo sapiens]                                     | 2.3           | 1            | 1          | 96     | 1                 | 26                      | 20                              | 1                                            | 1                                        | 0                | 1.70.E+08          | 1.70.E+08          | 1.78.E+08          | 1.47.E+08          | 2.15.E+08              | 2.15.E+08              | 2.31.E+08              | 2.18.E+08              |
| 2666 | Q8N5M9    | Protein jagunal homolog 1 [OS=Homo sapiens]                                                      | 2.2           | 7            | 1          | 1      | 1                 |                         | 0                               | 1                                            |                                          | 0                | 2.04.E+07          | 3.04.E+07          |                    |                    | 2.91.E+07              |                        | 3.05.E+07              | 3.07.E+07              |
| 2667 | Q5VY09    | immediate early response gene 5 protein [OS=Homo sapiens]                                        | 2.2           | 3            | 1          | 14     | 1                 | 0                       | 5                               | 1                                            | 1                                        | 0                | 3.49.E+07          | 5.03.E+07          | 5.37.E+07          | 5.07.E+07          | 6.67.E+07              |                        | 9.32.E+07              | 8.51.E+07              |
| 2668 | Q9H9T3    | elongator complex protein 3 [OS=Homo sapiens]                                                    | 2.2           | 3            | 1          | 2      | 1                 | 19                      | 0                               | 1                                            | 1                                        | 0                | 3.84.E+06          | 3.00.E+06          | 3.31.E+06          | 3.58.E+06          | 2.58.E+06              | 2.52.E+06              | 1.85.E+06              |                        |
| 2669 | Q9H9Y2    | Ribosome production factor 1 [OS=Homo sapiens]                                                   | 2.2           | 3            | 1          | 4      | 1                 | 0                       | 0                               | 1                                            | 1                                        | 0                | 2.47.E+06          | 2.87.E+06          | 3.06.E+06          | 2.83.E+06          | 1.85.E+06              |                        | 2.24.E+06              | 1.70.E+06              |
| 2670 | Q9H0U6    | 39S ribosomal protein L18, mitochondrial [OS=Homo sapiens]                                       | 2.2           | 5            | 1          | 2      | 1                 | 0                       | 2                               | 1                                            | 1                                        | 0                | 2.01.E+07          | 2.39.E+07          | 2.16.E+07          | 2.05.E+07          | 2.10.E+07              | 2.11.E+07              | 1.94.E+07              | 2.00.E+07              |
| 2671 | Q9H993    | protein-glutamate O-methyltransferase [OS=Homo sapiens]                                          | 2.2           | 4            | 1          | 2      | 1                 | 0                       | 0                               | 1                                            | 1                                        | 0                |                    | 1.40.E+07          | 1.48.E+07          |                    | 2.28.E+07              | 2.20.E+07              | 6.79.E+06              | 2.53.E+07              |
| 2672 | B1ANS9    | WD repeat-containing protein 64 [OS=Homo sapiens]                                                | 2.2           | 1            | 1          | 10     | 1                 | 0                       | 0                               | 1                                            | 1                                        | 0                | 6.82.E+07          | 5.73.E+07          | 7.11.E+07          | 8.40.E+07          | 5.50.E+07              | 5.57.E+07              | 6.65.E+07              | 5.82.E+07              |
| 2673 | Q9H9S4    | Calcium-binding protein 39-like [OS=Homo sapiens]                                                | 2.2           | 3            | 1          | 1      | 1                 | 0                       |                                 |                                              | 1                                        | 0                |                    |                    |                    |                    |                        |                        |                        |                        |
| 2674 | O00468    | Agrin OS=Homo sapiens OX=9606 GN=AGRN PE=1 SV=6                                                  | 2.2           | 0            | 1          | 1      | 1                 | 24                      |                                 |                                              | 1                                        | 0                | 4.55.E+06          | 5.76.E+06          | 5.49.E+06          | 5.12.E+06          | 6.00.E+06              | 7.16.E+06              | 5.78.E+06              | 7.21.E+06              |
| 2675 | Q8WXE9-1  | Stonin-2 [OS=Homo sapiens]                                                                       | 2.2           | 2            | 1          | 2      | 1                 | 15                      | 0                               | 1                                            | 1                                        | 0                | 1.79.E+06          | 1.46.E+06          | 1.84.E+06          | 2.73.E+06          | 1.64.E+06              | 2.32.E+06              | 2.26.E+06              |                        |
| 2676 | Q9BTY7    | Protein HGH1 homolog [OS=Homo sapiens]                                                           | 2.2           | 3            | 1          | 2      | 1                 | 16                      | 2                               | 1                                            | 1                                        | 0                | 2.97.E+07          | 3.16.E+07          | 2.91.E+07          | 2.12.E+07          | 1.24.E+07              | 1.00.E+07              | 1.65.E+07              | 7.84.E+06              |
| 2677 | P49790    | Nuclear pore complex protein Nup153 [OS=Homo sapiens]                                            | 2.2           | 2            | 1          | 1      | 1                 | 0                       |                                 |                                              | 1                                        | 0                | 3.62.E+06          | 9.68.E+06          | 3.16.E+06          | 3.34.E+06          |                        | 5.34.E+06              | 1.32.E+06              |                        |
| 2678 | Q96QH2-2  | Isoform 2 of PML-RARA-regulated adapter molecule 1 [OS=Homo sapiens]                             | 2.1           | 1            | 1          | 1      | 1                 | 0                       |                                 |                                              | 1                                        | 0                | 7.08.E+06          | 6.29.E+06          | 6.28.E+06          | 8.01.E+06          | 3.90.E+06              | 3.94.E+06              | 3.97.E+06              | 3.77.E+06              |
| 2679 | Q8WUX9    | Charged multivesicular body protein 7 [OS=Homo sapiens]                                          | 2.1           | 4            | 1          | 4      | 1                 | 33                      | 0                               | 1                                            | 1                                        | 0                | 2.18.E+06          | 2.58.E+06          | 2.27.E+06          | 2.19.E+06          | 1.80.E+06              | 1.31.E+06              | 1.52.E+06              | 1.38.E+06              |
| 2680 | P78316    | Nucleolar protein 14 [OS=Homo sapiens]                                                           | 2.1           | 2            | 1          | 2      | 1                 | 0                       | 2                               | 1                                            | 1                                        | 0                | 2.42.E+07          | 2.59.E+07          | 2.36.E+07          | 2.04.E+07          | 2.59.E+07              | 2.66.E+07              | 2.42.E+07              | 2.93.E+07              |
| 2681 | P17050    | alpha-N-acetylgalactosaminidase [OS=Homo sapiens]                                                | 2.1           | 3            | 1          | 2      | 1                 | 23                      | 0                               | 1                                            | 1                                        | 0                |                    |                    |                    |                    |                        |                        |                        |                        |
| 2682 | P10721-1  | Mast/stem cell growth factor receptor Kit [OS=Homo sapiens]                                      | 2.1           | 1            | 1          | 13     | 1                 |                         | 0                               | 1                                            |                                          | 0                | 2.07.E+07          | 1.94.E+07          | 2.27.E+07          | 1.84.E+07          | 2.26.E+07              | 2.49.E+07              | 2.78.E+07              | 2.74.E+07              |
| 2683 | Q08AM6    | Protein VAC14 homolog [OS=Homo sapiens]                                                          | 2.1           | 2            | 1          | 7      | 1                 | 0                       | 0                               | 1                                            | 1                                        | 0                | 2.26.E+07          | 1.87.E+07          | 2.36.E+07          | 1.97.E+07          | 1.83.E+07              | 1.70.E+07              | 1.79.E+07              | 1.59.E+07              |
| 2684 | Q86XA9    | HEAT repeat-containing protein 5A [OS=Homo sapiens]                                              | 2.1           | 1            | 1          | 4      | 1                 | 17                      | 0                               | 1                                            | 1                                        | 0                | 1.69.E+06          | 2.19.E+06          | 1.82.E+06          | 1.96.E+06          | 2.28.E+06              | 2.31.E+06              | 2.23.E+06              |                        |
| 2685 | Q93034    | Cullin-5 [OS=Homo sapiens]                                                                       | 2.1           | 1            | 1          | 2      | 1                 | 15                      | 0                               | 1                                            | 1                                        | 0                | 2.27.E+06          |                    | 9.20.E+05          | 2.12.E+06          | 5.28.E+06              | 3.00.E+06              | 3.65.E+06              | 4.53.E+06              |
| 2686 | O94900    | Thymocyte selection-associated high mobility group box protein TOX [OS=Homo sapiens]             | 2.1           | 4            | 1          | 15     | 1                 |                         | 0                               | 1                                            |                                          | 0                | 3.17.E+06          | 4.14.E+06          | 3.13.E+06          | 3.31.E+06          | 7.25.E+06              | 9.24.E+06              | 4.35.E+06              | 6.30.E+06              |
| 2687 | Q86VU5    | Catechol O-methyltransferase domain-containing protein 1 [OS=Homo sapiens]                       | 2.1           | 6            | 1          | 2      | 1                 | 0                       | 2                               | 1                                            | 1                                        | 0                | 4.80.E+06          | 4.64.E+06          | 5.03.E+06          | 5.99.E+06          | 4.58.E+06              | 3.79.E+06              | 3.49.E+06              | 3.41.E+06              |
| 2688 | Q32P41    | tRNA (guanine(37)-N1)-methyltransferase [OS=Homo sapiens]                                        | 2.1           | 3            | 1          | 11     | 1                 | 0                       | 3                               | 1                                            | 1                                        | 0                |                    |                    |                    |                    |                        |                        |                        |                        |
| 2689 | Q8ND56    | protein LSM14 homolog A [OS=Homo sapiens]                                                        | 2.1           | 2            | 1          | 2      | 1                 | 0                       | 0                               | 1                                            | 1                                        | 0                | 1.19.E+07          | 1.32.E+07          | 1.27.E+07          | 1.12.E+07          | 1.24.E+07              | 1.16.E+07              | 1.20.E+07              | 1.23.E+07              |
| 2690 | Q7Z3B4    | Nucleoporin p54 [OS=Homo sapiens]                                                                | 2.1           | 1            | 1          | 5      | 1                 | 0                       | 0                               | 1                                            | 1                                        | 0                | 1.19.E+07          | 1.03.E+07          | 1.15.E+07          | 1.02.E+07          | 1.23.E+07              | 1.20.E+07              | 1.01.E+07              | 1.21.E+07              |
| 2691 | P35251-1  | Replication factor C subunit 1 [OS=Homo sapiens]                                                 | 2.1           | 1            | 1          | 8      | 1                 | 19                      | 0                               | 1                                            | 1                                        | 0                | 1.02.E+06          | 1.82.E+06          | 1.44.E+06          | 1.19.E+06          | 6.25.E+06              | 4.34.E+06              | 4.00.E+06              | 5.73.E+06              |
| 2692 | P42336    | Phosphatidylinositol 4,5-bisphosphate 3-kinase catalytic subunit alpha isoform [OS=Homo sapiens] | 2.1           | 1            | 1          | 101    | 1                 | 13                      | 0                               | 1                                            | 1                                        | 0                | 2.19.E+08          | 1.98.E+08          | 2.66.E+08          | 1.67.E+08          | 3.06.E+08              | 2.75.E+08              | 3.52.E+08              | 3.38.E+08              |
| 2693 | P57772    | selenocysteine-specific elongation factor [OS=Homo sapiens]                                      | 2.1           | 3            | 1          | 3      | 1                 | 0                       | 4                               | 1                                            | 1                                        | 0                | 6.23.E+07          | 6.88.E+07          | 7.26.E+07          | 6.32.E+07          | 1.01.E+08              | 7.93.E+07              | 7.46.E+07              | 1.09.E+08              |



| No.  | Accession | Description                                                                          | Sum PEP Score | Coverage [%] | # Peptides | # PSMs | # Unique Peptides | Score Mascot: A5 Mascot | Score Sequest HT: A2 Sequest HT | # Peptides (by Search Engine): A2 Sequest HT | # Peptides (by Search Engine): A5 Mascot | # Razor Peptides | ctrl Abundance s_1 | ctrl Abundance s_2 | ctrl Abundance s_3 | ctrl Abundance s_4 | JAM-A KO Abundance s_1 | JAM-A KO Abundance s_2 | JAM-A KO Abundance s_3 | JAM-A KO Abundance s_4 |
|------|-----------|--------------------------------------------------------------------------------------|---------------|--------------|------------|--------|-------------------|-------------------------|---------------------------------|----------------------------------------------|------------------------------------------|------------------|--------------------|--------------------|--------------------|--------------------|------------------------|------------------------|------------------------|------------------------|
| 2694 | Q9NNW7-1  | thioredoxin reductase 2, mitochondrial [OS=Homo sapiens]                             | 2.1           | 5            | 1          | 2      | 1                 | 0                       | 0                               | 1                                            | 1                                        | 0                | 6.51.E+06          | 2.98.E+06          | 6.51.E+06          |                    | 6.33.E+06              | 8.81.E+06              | 4.67.E+06              | 5.08.E+06              |
| 2695 | P32321    | thioacytyldate deaminase [OS=Homo sapiens]                                           | 2.1           | 4            | 1          | 15     | 1                 | 0                       | 0                               | 1                                            | 1                                        | 0                | 2.11.E+07          | 1.94.E+07          | 2.21.E+07          | 2.43.E+07          | 2.74.E+07              | 2.28.E+07              | 2.65.E+07              | 2.36.E+07              |
| 2696 | Q92485-1  | acid sphingomyelinase-like phosphodiesterase 3B [OS=Homo sapiens]                    | 2.1           | 5            | 1          | 2      | 1                 | 0                       | 0                               | 1                                            | 1                                        | 0                | 1.52.E+07          | 1.45.E+07          | 1.41.E+07          | 1.50.E+07          | 1.50.E+07              | 1.82.E+06              | 6.05.E+06              | 1.10.E+07              |
| 2697 | Q9NPL8    | Complex I assembly factor TIMMDC1, mitochondrial [OS=Homo sapiens]                   | 2.1           | 8            | 1          | 2      | 1                 | 0                       | 0                               | 1                                            | 1                                        | 0                | 3.73.E+06          | 3.97.E+06          | 4.03.E+06          | 4.30.E+06          | 1.81.E+06              | 2.73.E+06              | 2.20.E+06              | 3.89.E+06              |
| 2698 | P48509    | CD151 antigen [OS=Homo sapiens]                                                      | 2.1           | 4            | 1          | 2      | 1                 | 15                      | 2                               | 1                                            | 1                                        | 0                |                    | 4.32.E+07          | 4.00.E+07          |                    |                        | 5.54.E+07              | 7.55.E+07              | 6.98.E+07              |
| 2699 | P49914    | 5-formyltetrahydrofolate cyclo-ligase [OS=Homo sapiens]                              | 2.1           | 3            | 1          | 13     | 1                 | 0                       | 0                               | 1                                            | 0                                        | 0                | 3.63.E+07          | 3.22.E+07          | 3.31.E+07          | 2.90.E+07          | 3.21.E+07              | 2.85.E+07              | 3.16.E+07              | 3.18.E+07              |
| 2700 | Q86YN1-1  | Dolichylidiphosphatase 1 [OS=Homo sapiens]                                           | 2.1           | 5            | 1          | 11     | 1                 | 18                      | 0                               | 1                                            | 1                                        | 0                | 5.35.E+06          | 5.68.E+06          | 5.04.E+06          | 4.82.E+06          | 5.34.E+06              | 4.50.E+06              | 4.87.E+06              | 3.73.E+06              |
| 2701 | O15116    | U6 snRNA-associated Sm-like protein LSm1 [OS=Homo sapiens]                           | 2.0           | 5            | 1          | 10     | 1                 | 39                      | 0                               | 1                                            | 1                                        | 0                | 1.63.E+07          | 1.57.E+07          | 1.87.E+07          | 1.49.E+07          | 1.35.E+07              | 1.85.E+07              | 1.72.E+07              | 1.59.E+07              |
| 2702 | Q9Y4K1    | beta/gamma crystallin domain-containing protein 1 [OS=Homo sapiens]                  | 2.0           | 1            | 1          | 6      | 1                 | 19                      | 0                               | 1                                            | 1                                        | 0                | 2.86.E+07          | 3.81.E+07          |                    | 5.34.E+07          | 3.59.E+07              | 4.91.E+07              |                        | 8.72.E+07              |
| 2703 | P15498-1  | Proto-oncogene vav [OS=Homo sapiens]                                                 | 2.0           | 2            | 1          | 3      | 1                 | 0                       | 0                               | 1                                            | 1                                        | 0                |                    |                    |                    |                    |                        |                        |                        |                        |
| 2704 | P11310-1  | medium-chain specific acyl-CoA dehydrogenase, mitochondrial [OS=Homo sapiens]        | 2.0           | 2            | 1          | 8      | 1                 | 0                       | 0                               | 1                                            | 1                                        | 0                | 7.71.E+06          | 7.54.E+06          | 1.02.E+07          | 6.72.E+06          | 1.19.E+07              | 1.26.E+07              | 1.31.E+07              | 1.15.E+07              |
| 2705 | P10243-1  | Myb-related protein A [OS=Homo sapiens]                                              | 2.0           | 1            | 1          | 20     | 1                 | 0                       | 0                               | 1                                            | 0                                        | 0                | 6.20.E+07          | 6.33.E+07          | 6.67.E+07          | 5.50.E+07          | 4.59.E+07              | 4.66.E+07              | 5.11.E+07              | 4.95.E+07              |
| 2706 | Q15629    | Translocating chain-associated membrane protein 1 [OS=Homo sapiens]                  | 2.0           | 2            | 1          | 6      | 1                 | 0                       | 0                               | 1                                            | 1                                        | 0                | 4.10.E+06          | 3.22.E+06          |                    | 3.59.E+06          | 7.75.E+06              | 9.87.E+06              | 8.99.E+06              | 9.48.E+06              |
| 2707 | O75530    | Polycomb protein EED [OS=Homo sapiens]                                               | 2.0           | 5            | 1          | 3      | 1                 | 0                       | 0                               | 1                                            | 0                                        | 0                | 1.86.E+07          | 2.13.E+07          | 2.16.E+07          | 1.72.E+07          | 2.21.E+07              | 2.46.E+07              | 2.06.E+07              | 2.21.E+07              |
| 2708 | Q13496    | Myotubularin [OS=Homo sapiens]                                                       | 2.0           | 1            | 1          | 6      | 1                 | 0                       | 0                               | 1                                            | 0                                        | 0                |                    |                    |                    |                    |                        |                        |                        |                        |
| 2709 | Q92785    | Zinc finger protein ubi-d4 [OS=Homo sapiens]                                         | 2.0           | 4            | 1          | 2      | 1                 | 0                       | 0                               | 1                                            | 1                                        | 0                | 1.13.E+07          | 1.36.E+07          | 5.23.E+06          | 4.70.E+06          | 1.06.E+07              | 1.41.E+07              | 6.81.E+06              | 9.29.E+06              |
| 2710 | Q6JEL2    | Kelch-like protein 10 [OS=Homo sapiens]                                              | 2.0           | 2            | 1          | 6      | 1                 | 0                       | 0                               | 1                                            | 1                                        | 0                | 2.65.E+05          | 7.35.E+05          | 2.58.E+05          | 1.48.E+05          | 5.30.E+05              | 7.03.E+05              | 6.16.E+05              | 4.25.E+05              |
| 2711 | Q92615    | la-related protein 4B [OS=Homo sapiens]                                              | 2.0           | 2            | 1          | 4      | 1                 | 0                       | 0                               | 1                                            | 1                                        | 0                | 1.18.E+07          | 5.93.E+06          | 1.07.E+07          | 1.29.E+07          | 5.53.E+06              | 5.61.E+06              | 6.26.E+06              | 1.02.E+07              |
| 2712 | Q9HCJ6    | Synaptic vesicle membrane protein VAT-1 homolog-like [OS=Homo sapiens]               | 2.0           | 3            | 1          | 7      | 1                 | 54                      | 5                               | 1                                            | 1                                        | 0                | 6.79.E+06          | 8.76.E+06          | 1.08.E+07          | 1.30.E+07          | 1.96.E+07              | 1.53.E+07              | 1.89.E+07              | 1.66.E+07              |
| 2713 | P14616    | Insulin receptor-related protein [OS=Homo sapiens]                                   | 2.0           | 1            | 1          | 25     | 1                 | 0                       | 0                               | 1                                            | 1                                        | 0                | 3.80.E+07          | 3.54.E+07          | 3.64.E+07          | 3.24.E+07          | 5.74.E+07              | 5.49.E+07              | 5.80.E+07              | 5.90.E+07              |
| 2714 | Q6NW29    | RWD domain-containing protein 4 [OS=Homo sapiens]                                    | 2.0           | 5            | 1          | 1      | 1                 | 0                       | 0                               | 1                                            | 0                                        | 0                | 6.49.E+06          | 7.35.E+06          | 6.74.E+06          | 5.85.E+06          | 5.39.E+06              | 8.47.E+06              | 6.32.E+06              | 7.53.E+06              |
| 2715 | Q7Z6K5-2  | Isoform C15orf38-AP3S2 of Arpin [OS=Homo sapiens]                                    | 2.0           | 3            | 1          | 1      | 1                 | 0                       | 0                               | 1                                            | 0                                        | 0                | 1.20.E+07          | 1.12.E+07          | 9.59.E+06          | 1.38.E+07          | 1.53.E+07              | 1.15.E+07              | 1.36.E+07              | 1.17.E+07              |
| 2716 | Q9UPQ3-1  | Arf-GAP with GTPase, ANK repeat and PH domain-containing protein 1 [OS=Homo sapiens] | 2.0           | 2            | 1          | 2      | 1                 | 0                       | 0                               | 1                                            | 1                                        | 0                | 2.73.E+06          | 3.63.E+06          | 2.72.E+06          | 2.68.E+06          | 2.88.E+06              | 3.28.E+06              | 2.81.E+06              | 3.36.E+06              |
| 2717 | O75695    | Protein XRP2 [OS=Homo sapiens]                                                       | 2.0           | 2            | 1          | 3      | 1                 | 0                       | 0                               | 1                                            | 1                                        | 0                | 2.26.E+07          | 1.97.E+07          | 2.21.E+07          | 2.54.E+07          | 2.43.E+07              | 2.96.E+07              | 2.80.E+07              | 2.80.E+07              |
| 2718 | Q9UJ41-1  | Rab5 GDP/GTP exchange factor [OS=Homo sapiens]                                       | 2.0           | 2            | 1          | 2      | 1                 | 0                       | 2                               | 1                                            | 0                                        | 0                | 1.84.E+07          |                    |                    |                    |                        |                        |                        |                        |
| 2719 | Q9Y6Q5-2  | Isoform 2 of AP-1 complex subunit mu-2 [OS=Homo sapiens]                             | 2.0           | 5            | 1          | 1      | 1                 | 0                       | 0                               | 1                                            | 0                                        | 0                | 1.35.E+06          | 8.19.E+06          | 1.14.E+06          | 2.98.E+06          | 4.28.E+05              | 6.84.E+05              |                        | 7.26.E+05              |
| 2720 | Q6AI08    | HEAT repeat-containing protein 6 [OS=Homo sapiens]                                   | 2.0           | 1            | 1          | 6      | 1                 | 40                      | 0                               | 1                                            | 1                                        | 0                | 2.83.E+06          | 3.71.E+06          | 3.27.E+06          | 3.50.E+06          | 6.36.E+06              | 5.42.E+06              | 5.26.E+06              | 5.21.E+06              |
| 2721 | O75368    | SH3 domain-binding glutamic acid-rich-like protein [OS=Homo sapiens]                 | 2.0           | 16           | 1          | 4      | 1                 | 24                      | 0                               | 1                                            | 1                                        | 0                | 1.11.E+06          |                    |                    |                    | 8.33.E+06              | 6.63.E+06              | 8.33.E+06              |                        |
| 2722 | Q86UQ4    | ATP-binding cassette sub-family A member 13 [OS=Homo sapiens]                        | 2.0           | 0            | 1          | 5      | 1                 | 0                       |                                 |                                              | 1                                        | 0                | 3.82.E+08          | 3.99.E+08          | 4.09.E+08          | 3.55.E+08          | 3.25.E+08              | 3.58.E+08              | 3.53.E+08              | 3.49.E+08              |
| 2723 | Q6BDS2    | UHRF1-binding protein 1 [OS=Homo sapiens]                                            | 2.0           | 1            | 1          | 9      | 1                 | 15                      | 0                               | 1                                            | 1                                        | 0                | 4.42.E+07          | 2.49.E+07          | 4.06.E+07          | 4.75.E+07          | 1.17.E+08              | 1.18.E+08              | 1.45.E+08              | 1.32.E+08              |
| 2724 | Q06546    | GA-binding protein alpha chain [OS=Homo sapiens]                                     | 1.9           | 3            | 1          | 1      | 1                 | 0                       | 0                               | 1                                            | 1                                        | 0                | 8.11.E+06          | 4.20.E+06          | 9.22.E+06          | 3.61.E+06          | 8.42.E+06              | 1.18.E+07              | 4.40.E+06              | 9.49.E+06              |
| 2725 | A6NK44    | Glyoxalase domain-containing protein 5 [OS=Homo sapiens]                             | 1.9           | 8            | 1          | 13     | 1                 | 0                       | 0                               | 1                                            | 1                                        | 0                | 3.58.E+07          | 3.00.E+07          | 3.47.E+07          | 2.94.E+07          | 4.31.E+07              | 4.77.E+07              | 4.70.E+07              | 4.86.E+07              |
| 2726 | O95881    | Thioredoxin domain-containing protein 12 [OS=Homo sapiens]                           | 1.9           | 8            | 1          | 3      | 1                 | 0                       | 0                               | 1                                            | 1                                        | 0                | 2.88.E+07          | 2.99.E+07          |                    |                    | 2.92.E+07              | 3.41.E+07              |                        | 3.70.E+07              |
| 2727 | P54278    | Mismatch repair endonuclease PMS2 [OS=Homo sapiens]                                  | 1.9           | 2            | 1          | 1      | 1                 | 0                       |                                 |                                              | 1                                        | 0                | 3.97.E+06          | 3.68.E+06          | 3.29.E+06          | 2.90.E+06          | 4.94.E+06              | 6.22.E+06              | 6.09.E+06              | 4.81.E+06              |
| 2728 | O00178    | GTP-binding protein 1 [OS=Homo sapiens]                                              | 1.9           | 3            | 1          | 2      | 1                 | 0                       | 0                               | 1                                            | 1                                        | 0                | 2.26.E+06          | 2.74.E+06          | 3.72.E+06          | 2.72.E+06          | 2.35.E+06              | 1.09.E+06              | 2.47.E+06              | 2.17.E+06              |
| 2729 | P49006    | MARCKS-related protein [OS=Homo sapiens]                                             | 1.9           | 8            | 1          | 4      | 1                 | 18                      | 0                               | 1                                            | 1                                        | 0                |                    |                    |                    |                    |                        |                        |                        |                        |
| 2730 | Q9Y619    | mitochondrial ornithine transporter 1 [OS=Homo sapiens]                              | 1.9           | 9            | 1          | 4      | 1                 | 0                       | 0                               | 1                                            | 1                                        | 0                | 3.59.E+06          |                    | 1.08.E+06          |                    | 5.65.E+06              | 4.96.E+06              | 1.87.E+06              | 5.54.E+06              |
| 2731 | O60502    | protein O-GlcNAcase [OS=Homo sapiens]                                                | 1.9           | 2            | 1          | 1      | 1                 | 0                       | 0                               | 1                                            | 0                                        | 0                |                    |                    |                    |                    |                        |                        |                        |                        |
| 2732 | Q9UKG1    | DCC-interacting protein 13-alpha [OS=Homo sapiens]                                   | 1.9           | 2            | 1          | 4      | 1                 | 0                       | 0                               | 1                                            | 0                                        | 0                | 3.18.E+06          | 2.85.E+06          | 3.15.E+06          | 2.69.E+06          | 3.44.E+06              | 3.57.E+06              | 3.74.E+06              | 3.70.E+06              |
| 2733 | Q8NG06    | E3 ubiquitin-protein ligase TRIM58 [OS=Homo sapiens]                                 | 1.9           | 3            | 1          | 3      | 1                 | 0                       | 0                               | 1                                            | 0                                        | 0                | 5.05.E+06          | 3.43.E+06          | 5.04.E+06          | 4.78.E+06          | 7.42.E+06              | 7.09.E+06              | 6.72.E+06              | 6.83.E+06              |
| 2734 | Q9NZU0    | Leucine-rich repeat transmembrane protein FLRT3 [OS=Homo sapiens]                    | 1.9           | 1            | 1          | 3      | 1                 | 0                       | 0                               | 1                                            | 0                                        | 0                | 1.30.E+07          | 1.31.E+07          | 1.30.E+07          | 1.15.E+07          | 1.42.E+07              | 1.37.E+07              | 1.36.E+07              | 1.38.E+07              |
| 2735 | Q9UKW6-1  | ETS-related transcription factor Elf-5 [OS=Homo sapiens]                             | 1.9           | 7            | 1          | 17     | 1                 | 0                       |                                 |                                              | 1                                        | 0                | 1.45.E+07          | 1.48.E+07          | 1.41.E+07          | 1.17.E+07          | 1.89.E+07              | 2.02.E+07              | 1.83.E+07              | 1.77.E+07              |
| 2736 | Q6P9G9-1  | zinc finger protein 449 [OS=Homo sapiens]                                            | 1.9           | 3            | 1          | 1      | 1                 | 0                       | 0                               | 1                                            | 0                                        | 0                |                    |                    |                    |                    |                        |                        |                        |                        |
| 2737 | Q9P0U1    | Mitochondrial import receptor subunit TOM7 homolog [OS=Homo sapiens]                 | 1.9           | 11           | 1          | 5      | 1                 | 0                       | 5                               | 1                                            | 0                                        | 0                | 5.04.E+07          | 4.30.E+07          | 5.29.E+07          | 4.95.E+07          | 3.39.E+07              | 2.75.E+07              | 3.50.E+07              | 3.43.E+07              |
| 2738 | O95983-1  | methyl-CpG-binding domain protein 3 [OS=Homo sapiens]                                | 1.9           | 5            | 1          | 4      | 1                 | 26                      | 0                               | 1                                            | 1                                        | 0                | 2.62.E+06          | 1.03.E+06          |                    |                    | 4.00.E+06              | 4.06.E+06              |                        | 5.10.E+06              |
| 2739 | O75884-1  | Putative hydrolase RBBP9 [OS=Homo sapiens]                                           | 1.8           | 11           | 1          | 2      | 1                 | 0                       | 0                               | 1                                            | 1                                        | 0                |                    |                    |                    |                    |                        |                        |                        |                        |
| 2740 | O43815    | striatin [OS=Homo sapiens]                                                           | 1.8           | 2            | 1          | 2      | 1                 | 0                       | 0                               | 1                                            | 1                                        | 0                | 5.06.E+06          | 4.80.E+06          | 4.81.E+06          | 5.30.E+06          | 4.48.E+06              | 2.96.E+06              | 4.18.E+06              | 3.39.E+06              |
| 2741 | Q9NSU2-3  | Isoform 3 of Three-prime repair exonuclease 1 [OS=Homo sapiens]                      | 1.8           | 6            | 1          | 2      | 1                 | 0                       | 0                               | 1                                            | 1                                        | 0                | 9.90.E+05          | 2.07.E+06          | 2.33.E+06          | 2.13.E+06          | 6.12.E+05              | 5.25.E+05              | 1.22.E+06              | 6.50.E+05              |
| 2742 | Q7L9L4    | mob kinase activator 1b [OS=Homo sapiens]                                            | 1.8           | 3            | 1          | 30     | 1                 | 28                      | 0                               | 1                                            | 1                                        | 0                | 4.44.E+07          | 3.89.E+07          | 4.32.E+07          | 3.44.E+07          | 5.03.E+07              | 5.06.E+07              | 5.68.E+07              | 5.44.E+07              |
| 2743 | Q8TAQ2    | SWI/SNF complex subunit SMARCC2 [OS=Homo sapiens]                                    | 1.8           | 2            | 1          | 1      | 1                 | 0                       | 0                               | 1                                            | 0                                        | 0                | 5.10.E+06          | 4.80.E+06          | 3.84.E+06          | 3.70.E+06          | 6.54.E+06              | 6.53.E+06              | 6.79.E+06              | 5.63.E+06              |
| 2744 | Q9BQF6    | Sentrin-specific protease 7 [OS=Homo sapiens]                                        | 1.8           | 1            | 1          | 30     | 1                 | 0                       | 0                               | 1                                            | 1                                        | 0                | 1.67.E+08          | 1.57.E+08          | 1.74.E+08          | 1.99.E+08          | 1.19.E+08              | 1.18.E+08              | 1.41.E+08              | 1.28.E+08              |
| 2745 | P49642    | DNA primase small subunit [OS=Homo sapiens]                                          | 1.8           | 5            | 1          | 1      | 1                 | 0                       | 0                               | 1                                            | 0                                        | 0                |                    |                    |                    |                    |                        |                        |                        |                        |
| 2746 | Q6UWE0    | E3 ubiquitin-protein ligase LRSAM1 [OS=Homo sapiens]                                 | 1.8           | 2            | 1          | 2      | 1                 | 0                       | 0                               | 1                                            | 1                                        | 0                | 2.72.E+06          | 2.88.E+06          | 2.92.E+06          | 2.71.E+06          | 1.66.E+06              | 1.67.E+06              | 1.55.E+06              | 1.68.E+06              |
| 2747 | O14981    | TATA-binding protein-associated factor 172 [OS=Homo sapiens]                         | 1.8           | 1            | 1          | 2      | 1                 | 15                      | 0                               | 1                                            | 1                                        | 0                | 2.28.E+06          |                    | 1.83.E+06          | 2.20.E+06          | 4.80.E+06              | 3.28.E+06              | 3.09.E+06              | 4.21.E+06              |

| No.  | Accession | Description                                                                        | Sum PEP Score | Coverage [%] | # Peptides | # PSMs | # Unique Peptides | Score Mascot: A5 Mascot | Score Sequest HT: A2 Sequest HT | # Peptides (by Search Engine): A2 Sequest HT | # Peptides (by Search Engine): A5 Mascot | # Razor Peptides | ctrl Abundance_s_1 | ctrl Abundance_s_2 | ctrl Abundance_s_3 | ctrl Abundance_s_4 | JAM-A KO Abundance_s_1 | JAM-A KO Abundance_s_2 | JAM-A KO Abundance_s_3 | JAM-A KO Abundance_s_4 |
|------|-----------|------------------------------------------------------------------------------------|---------------|--------------|------------|--------|-------------------|-------------------------|---------------------------------|----------------------------------------------|------------------------------------------|------------------|--------------------|--------------------|--------------------|--------------------|------------------------|------------------------|------------------------|------------------------|
| 2748 | Q8N944    | APC membrane recruitment protein 3 [OS=Homo sapiens]                               | 1.8           | 2            | 1          | 9      | 1                 | 0                       | 0                               | 1                                            | 1                                        | 0                |                    |                    |                    |                    |                        |                        |                        |                        |
| 2749 | Q8NDH2    | Coiled-coil domain-containing protein 168 [OS=Homo sapiens]                        | 1.8           | 0            | 1          | 2      | 1                 | 0                       | 0                               | 1                                            | 1                                        | 0                | 1.64.E+06          | 1.70.E+06          | 2.54.E+06          | 1.61.E+06          | 3.02.E+06              | 3.60.E+06              | 3.75.E+06              | 3.34.E+06              |
| 2750 | Q9BXS5-1  | AP-1 complex subunit mu-1 [OS=Homo sapiens]                                        | 1.8           | 4            | 1          | 2      | 1                 | 0                       | 0                               | 1                                            | 1                                        | 0                | 4.37.E+06          | 2.14.E+06          | 1.99.E+06          | 1.78.E+06          | 3.23.E+06              | 2.75.E+06              | 3.51.E+06              | 3.20.E+06              |
| 2751 | 0A1B0GUW  | Uncharacterized protein SPEM3 OS=Homo sapiens OX=9606 GN=SPEM3 PE=3 SV=1           | 1.8           | 2            | 1          | 1      | 1                 | 0                       |                                 |                                              | 1                                        | 0                | 6.14.E+05          | 7.36.E+05          | 8.36.E+05          | 7.52.E+05          | 1.16.E+06              | 1.26.E+06              | 1.33.E+06              | 9.83.E+05              |
| 2752 | Q8N1G1    | RNA exonuclease 1 homolog [OS=Homo sapiens]                                        | 1.8           | 2            | 1          | 1      | 1                 | 0                       |                                 |                                              | 1                                        | 0                |                    |                    |                    |                    |                        |                        |                        |                        |
| 2753 | Q8NAF0    | Zinc finger protein 579 [OS=Homo sapiens]                                          | 1.8           | 3            | 1          | 1      | 1                 | 0                       | 0                               | 1                                            | 0                                        | 0                | 5.18.E+05          | 5.69.E+05          | 5.82.E+05          | 4.26.E+05          | 3.63.E+05              | 3.78.E+05              | 3.92.E+05              | 4.05.E+05              |
| 2754 | Q8NFW8    | N-acylneuraminate cytidylyltransferase [OS=Homo sapiens]                           | 1.7           | 3            | 1          | 2      | 1                 | 0                       | 0                               | 1                                            | 1                                        | 0                | 2.56.E+06          | 2.32.E+06          | 2.42.E+06          | 2.34.E+06          | 2.86.E+06              | 3.55.E+06              | 2.71.E+06              | 2.30.E+06              |
| 2755 | A3KMH1    | von Willebrand factor A domain-containing protein 8 [OS=Homo sapiens]              | 1.7           | 1            | 1          | 2      | 1                 | 16                      | 0                               | 1                                            | 1                                        | 0                | 3.10.E+06          | 3.63.E+06          | 4.00.E+06          | 3.89.E+06          | 5.91.E+06              | 4.12.E+06              |                        | 6.04.E+06              |
| 2756 | Q9UK61    | Protein TASOR [OS=Homo sapiens]                                                    | 1.7           | 1            | 1          | 4      | 1                 | 0                       | 0                               | 1                                            | 1                                        | 0                | 3.52.E+06          | 3.90.E+06          |                    | 4.80.E+06          | 3.97.E+06              | 3.86.E+06              | 3.35.E+06              | 3.18.E+06              |
| 2757 | Q86Y97    | Histone-lysine N-methyltransferase KMT5C [OS=Homo sapiens]                         | 1.7           | 3            | 1          | 18     | 1                 | 0                       | 0                               | 1                                            | 1                                        | 0                | 8.00.E+06          | 9.64.E+06          | 5.75.E+06          | 8.82.E+06          | 8.22.E+06              | 8.14.E+06              | 5.85.E+06              | 8.29.E+06              |
| 2758 | Q8IXJ9    | Putative Polycomb group protein ASXL1 [OS=Homo sapiens]                            | 1.7           | 1            | 1          | 18     | 1                 |                         | 0                               | 1                                            |                                          | 0                | 1.58.E+08          | 1.49.E+08          | 1.59.E+08          | 1.73.E+08          | 1.38.E+08              | 1.43.E+08              | 1.48.E+08              | 1.47.E+08              |
| 2759 | Q9H1D0    | Transient receptor potential cation channel subfamily V member 6 [OS=Homo sapiens] | 1.7           | 1            | 1          | 1      | 1                 | 0                       |                                 |                                              | 1                                        | 0                | 1.11.E+07          | 1.23.E+07          | 2.12.E+07          | 1.37.E+07          | 1.53.E+07              | 1.61.E+07              | 1.97.E+07              | 1.91.E+07              |
| 2760 | P08069    | Insulin-like growth factor 1 receptor [OS=Homo sapiens]                            | 1.7           | 1            | 1          | 1      | 1                 | 0                       |                                 |                                              | 1                                        | 0                |                    |                    |                    |                    |                        |                        |                        |                        |
| 2761 | Q96AE7    | Tetratricopeptide repeat protein 17 [OS=Homo sapiens]                              | 1.7           | 1            | 1          | 62     | 1                 | 0                       | 0                               | 1                                            | 1                                        | 0                | 3.99.E+07          | 2.59.E+07          | 4.45.E+07          | 2.26.E+07          | 4.86.E+07              | 4.14.E+07              | 6.58.E+07              | 6.04.E+07              |
| 2762 | Q9UKN7    | Unconventional myosin-XV [OS=Homo sapiens]                                         | 1.7           | 1            | 1          | 8      | 1                 | 0                       |                                 |                                              | 1                                        | 0                | 3.24.E+06          | 2.61.E+06          | 2.89.E+06          | 2.03.E+06          | 4.68.E+06              | 6.00.E+06              | 4.60.E+06              | 4.52.E+06              |
| 2763 | Q96JQ0    | Protocadherin-16 [OS=Homo sapiens]                                                 | 1.7           | 1            | 1          | 2      | 1                 | 0                       | 0                               | 1                                            | 1                                        | 0                |                    |                    |                    |                    |                        |                        |                        |                        |
| 2764 | Q9BPX6-1  | Calcium uptake protein 1, mitochondrial [OS=Homo sapiens]                          | 1.7           | 1            | 1          | 2      | 1                 | 0                       | 0                               | 1                                            | 1                                        | 0                | 6.11.E+06          | 6.08.E+06          | 4.81.E+06          | 5.51.E+06          | 3.83.E+06              | 4.97.E+06              | 1.95.E+06              | 4.38.E+06              |
| 2765 | Q8NGC3    | Olfactory receptor 10G2 OS=Homo sapiens OX=9606 GN=OR10G2 PE=2 SV=1                | 1.7           | 5            | 1          | 4      | 1                 | 0                       |                                 |                                              | 1                                        | 0                | 6.19.E+05          | 6.99.E+05          | 7.11.E+05          | 8.78.E+05          | 3.55.E+05              | 3.95.E+05              | 3.80.E+05              | 2.59.E+05              |
| 2766 | Q9NRK6    | ATP-binding cassette sub-family B member 10, mitochondrial [OS=Homo sapiens]       | 1.7           | 1            | 1          | 2      | 1                 | 22                      | 0                               | 1                                            | 1                                        | 0                | 5.25.E+06          | 5.60.E+06          | 9.85.E+05          | 6.38.E+06          | 4.83.E+06              | 5.45.E+06              | 2.31.E+06              | 6.89.E+06              |
| 2767 | A6NFR6-1  | Putative uncharacterized protein C5orf60 [OS=Homo sapiens]                         | 1.7           | 4            | 1          | 1      | 1                 | 0                       |                                 |                                              | 1                                        | 0                | 4.15.E+05          | 4.63.E+05          | 3.77.E+05          | 3.03.E+05          | 5.08.E+05              | 7.05.E+05              | 4.47.E+05              | 5.47.E+05              |
| 2768 | Q9P013    | spliceosome-associated protein CWC15 homolog [OS=Homo sapiens]                     | 1.7           | 5            | 1          | 3      | 1                 | 0                       |                                 |                                              | 1                                        | 0                | 3.08.E+07          | 2.91.E+07          | 3.12.E+07          | 3.55.E+07          | 2.65.E+07              | 3.03.E+07              | 2.88.E+07              | 2.90.E+07              |
| 2769 | Q86X16    | Protein phosphatase 1 regulatory subunit 3B [OS=Homo sapiens]                      | 1.7           | 4            | 1          | 2      | 1                 | 0                       | 0                               | 1                                            | 1                                        | 0                | 2.05.E+07          | 3.39.E+07          | 3.78.E+07          | 2.72.E+07          | 3.09.E+07              | 2.84.E+07              | 3.64.E+07              | 3.41.E+07              |
| 2770 | Q8WVV9    | Heterogeneous nuclear ribonucleoprotein L-like [OS=Homo sapiens]                   | 1.7           | 5            | 1          | 5      | 1                 | 0                       | 0                               | 1                                            | 1                                        | 0                | 8.98.E+06          | 2.07.E+07          | 1.49.E+07          | 1.74.E+07          | 1.97.E+07              | 2.63.E+07              | 1.78.E+07              | 2.04.E+07              |
| 2771 | Q504Q3    | PAB-dependent poly(A)-specific ribonuclease subunit PAN2 [OS=Homo sapiens]         | 1.7           | 1            | 1          | 9      | 1                 | 0                       | 0                               | 1                                            | 1                                        | 0                |                    |                    |                    |                    |                        |                        |                        |                        |
| 2772 | Q641Q2    | WASH complex subunit 2A [OS=Homo sapiens]                                          | 1.6           | 1            | 1          | 2      | 1                 | 0                       | 0                               | 1                                            | 1                                        | 0                | 8.68.E+06          | 9.48.E+06          | 8.86.E+06          | 1.25.E+07          | 1.51.E+07              | 1.15.E+07              | 7.29.E+06              | 3.39.E+06              |
| 2773 | Q96F83    | Uncharacterized protein C14orf79 [OS=Homo sapiens]                                 | 1.6           | 3            | 1          | 4      | 1                 | 0                       | 0                               | 1                                            | 1                                        | 0                | 4.12.E+06          | 6.46.E+06          | 5.43.E+06          | 7.44.E+06          | 1.95.E+07              | 1.74.E+07              | 2.06.E+07              | 2.03.E+07              |
| 2774 | O75592    | E3 ubiquitin-protein ligase MYCBP2 OS=Homo sapiens OX=9606 GN=MYCBP2 PE=1 SV=4     | 1.6           | 0            | 1          | 22     | 1                 | 0                       |                                 |                                              | 1                                        | 0                |                    |                    |                    |                    |                        |                        |                        |                        |
| 2775 | Q9UBR2    | Cathepsin Z [OS=Homo sapiens]                                                      | 1.6           | 4            | 1          | 5      | 1                 | 0                       | 2                               | 1                                            | 1                                        | 0                |                    |                    |                    |                    |                        |                        |                        |                        |
| 2776 | P49279    | natural resistance-associated macrophage protein 1 [OS=Homo sapiens]               | 1.6           | 1            | 1          | 6      | 1                 | 0                       |                                 |                                              | 1                                        | 0                |                    |                    |                    |                    |                        |                        |                        |                        |
| 2777 | Q8N4H5    | mitochondrial import receptor subunit TOM5 homolog [OS=Homo sapiens]               | 1.6           | 14           | 1          | 15     | 1                 | 0                       | 3                               | 1                                            | 1                                        | 0                | 7.33.E+07          | 6.72.E+07          | 7.24.E+07          | 5.94.E+07          | 4.27.E+07              | 4.52.E+07              | 5.10.E+07              | 4.47.E+07              |
| 2778 | O14776-1  | Transcription elongation regulator 1 [OS=Homo sapiens]                             | 1.6           | 1            | 1          | 4      | 1                 | 0                       | 0                               | 1                                            | 1                                        | 0                |                    | 1.07.E+07          | 1.45.E+07          | 1.01.E+07          | 1.36.E+07              | 1.26.E+07              | 1.42.E+07              | 1.21.E+07              |
| 2779 | Q10587    | thyrotroph embryonic factor [OS=Homo sapiens]                                      | 1.6           | 4            | 1          | 5      | 1                 | 0                       | 0                               | 1                                            | 1                                        | 0                | 4.87.E+07          | 5.43.E+07          | 5.16.E+07          | 5.33.E+07          | 5.46.E+07              | 6.39.E+07              | 5.79.E+07              | 5.80.E+07              |
| 2780 | Q71RC2    | La-related protein 4 [OS=Homo sapiens]                                             | 1.6           | 3            | 1          | 2      | 1                 | 0                       | 0                               | 1                                            | 1                                        | 0                | 9.29.E+06          | 7.80.E+06          | 7.59.E+06          | 1.07.E+07          | 7.94.E+06              | 8.55.E+06              | 1.19.E+07              | 8.83.E+06              |
| 2781 | Q9BX84    | Transient receptor potential cation channel subfamily M member 6 [OS=Homo sapiens] | 1.6           | 1            | 1          | 16     | 1                 | 0                       | 0                               | 1                                            | 1                                        | 0                | 1.66.E+06          | 1.25.E+06          |                    |                    |                        | 1.32.E+06              | 1.15.E+06              | 1.23.E+06              |
| 2782 | Q9NV70-1  | exocyst complex component 1 [OS=Homo sapiens]                                      | 1.6           | 2            | 1          | 1      | 1                 | 0                       |                                 |                                              | 1                                        | 0                |                    |                    |                    |                    |                        |                        |                        |                        |
| 2783 | Q13393-1  | Phospholipase D1 [OS=Homo sapiens]                                                 | 1.6           | 1            | 1          | 55     | 1                 | 0                       | 0                               | 1                                            | 1                                        | 0                | 5.39.E+07          | 5.09.E+07          | 5.36.E+07          | 4.43.E+07          | 4.42.E+07              | 4.82.E+07              | 4.72.E+07              | 4.54.E+07              |
| 2784 | P52758    | 2-iminobutanoate/2-iminopropanoate deaminase [OS=Homo sapiens]                     | 1.6           | 12           | 1          | 1      | 1                 | 0                       |                                 |                                              | 1                                        | 0                |                    |                    |                    |                    |                        |                        |                        |                        |
| 2785 | Q8NI08    | Nuclear receptor coactivator 7 [OS=Homo sapiens]                                   | 1.6           | 1            | 1          | 3      | 1                 | 0                       | 0                               | 1                                            | 1                                        | 0                | 3.85.E+06          | 3.90.E+06          |                    | 4.42.E+06          | 4.34.E+06              | 4.54.E+06              |                        | 4.83.E+06              |
| 2786 | Q9BZF1-1  | Oxysterol-binding protein-related protein 8 [OS=Homo sapiens]                      | 1.6           | 1            | 1          | 2      | 1                 | 0                       | 0                               | 1                                            | 1                                        | 0                | 4.25.E+06          | 3.75.E+06          | 3.64.E+06          | 3.72.E+06          | 3.82.E+06              | 4.84.E+06              | 3.78.E+06              | 4.74.E+06              |
| 2787 | Q16706    | Alpha-mannosidase 2 [OS=Homo sapiens]                                              | 1.6           | 1            | 1          | 2      | 1                 | 0                       | 0                               | 1                                            | 1                                        | 0                |                    |                    |                    |                    |                        |                        |                        |                        |
| 2788 | Q9BSJ6    | Protein PIMREG [OS=Homo sapiens]                                                   | 1.6           | 3            | 1          | 2      | 1                 | 0                       | 2                               | 1                                            | 1                                        | 0                | 4.72.E+07          | 4.15.E+07          | 5.13.E+07          | 5.96.E+07          | 5.92.E+07              | 6.15.E+07              | 7.12.E+07              | 6.83.E+07              |
| 2789 | Q6ZS17    | RHO family-interacting cell polarization regulator 1 [OS=Homo sapiens]             | 1.5           | 1            | 1          | 7      | 1                 | 0                       | 0                               | 1                                            | 1                                        | 0                | 1.96.E+06          | 2.03.E+06          | 2.43.E+06          | 2.14.E+06          | 1.78.E+06              | 2.57.E+06              | 3.25.E+06              | 2.41.E+06              |
| 2790 | Q8WW01    | tRNA-splicing endonuclease subunit Sen15 [OS=Homo sapiens]                         | 1.5           | 11           | 1          | 14     | 1                 | 18                      | 0                               | 1                                            | 1                                        | 0                |                    |                    |                    |                    |                        |                        |                        |                        |
| 2791 | Q95163    | Elongator complex protein 1 [OS=Homo sapiens]                                      | 1.5           | 1            | 1          | 2      | 1                 | 0                       | 0                               | 1                                            | 1                                        | 0                |                    |                    |                    |                    |                        | 1.27.E+07              |                        | 9.49.E+06              |
| 2792 | Q86UD0    | Suppressor APC domain-containing protein 2 [OS=Homo sapiens]                       | 1.5           | 4            | 1          | 61     | 1                 | 0                       | 39                              | 1                                            | 1                                        | 0                | 4.06.E+07          | 3.69.E+07          | 4.39.E+07          | 2.93.E+07          | 2.48.E+07              | 2.90.E+07              | 3.71.E+07              | 2.67.E+07              |
| 2793 | Q9NZJ9-2  | Isoform 2 of Diphosphoinositol polyphosphate phosphohydrolase 2 [OS=Homo sapiens]  | 1.5           | 8            | 1          | 6      | 1                 | 0                       | 0                               | 1                                            | 1                                        | 0                | 3.68.E+06          | 3.14.E+06          | 4.44.E+06          | 2.37.E+06          | 1.78.E+06              | 2.19.E+06              | 3.97.E+06              | 2.67.E+06              |

| No.  | Accession | Description                                                                                | Sum PEP Score | Coverage [%] | # Peptides | # PSMs | # Unique Peptides | Score Mascot: A5 Mascot | Score Sequest HT: A2 Sequest HT | # Peptides (by Search Engine): A2 Sequest HT | # Peptides (by Search Engine): A5 Mascot | # Razor Peptides | ctrl Abundance_s_1 | ctrl Abundance_s_2 | ctrl Abundance_s_3 | ctrl Abundance_s_4 | JAM-A KO Abundance_s_1 | JAM-A KO Abundance_s_2 | JAM-A KO Abundance_s_3 | JAM-A KO Abundance_s_4 |
|------|-----------|--------------------------------------------------------------------------------------------|---------------|--------------|------------|--------|-------------------|-------------------------|---------------------------------|----------------------------------------------|------------------------------------------|------------------|--------------------|--------------------|--------------------|--------------------|------------------------|------------------------|------------------------|------------------------|
| 2794 | Q6P2M8-1  | Calcium/calmodulin-dependent protein kinase type 1B [OS=Homo sapiens]                      | 1.5           | 3            | 1          | 24     | 1                 | 0                       | 0                               | 1                                            | 1                                        | 0                | 2.26.E+06          | 2.15.E+06          | 2.60.E+06          | 2.01.E+06          | 2.86.E+06              | 4.26.E+06              | 4.21.E+06              | 3.24.E+06              |
| 2795 | Q9C0D3    | Protein zyg-11 homolog B [OS=Homo sapiens]                                                 | 1.5           | 1            | 1          | 1      | 1                 | 0                       |                                 |                                              | 1                                        | 0                |                    |                    |                    |                    |                        |                        |                        |                        |
| 2796 | Q9P1Z9-2  | Isoform 2 of Coiled-coil domain-containing protein 180 [OS=Homo sapiens]                   | 1.5           | 0            | 1          | 29     | 1                 | 22                      | 0                               | 1                                            | 1                                        | 0                | 3.08.E+07          | 2.64.E+07          | 2.86.E+07          | 3.12.E+07          | 3.12.E+07              | 2.80.E+07              | 3.32.E+07              | 2.89.E+07              |
| 2797 | O60487    | Myelin protein zero-like protein 2 [OS=Homo sapiens]                                       | 1.5           | 4            | 1          | 2      | 1                 | 0                       | 0                               | 1                                            | 1                                        | 0                | 9.12.E+06          | 9.97.E+06          | 1.08.E+07          | 1.07.E+07          | 2.81.E+06              | 2.66.E+06              | 3.07.E+06              |                        |
| 2798 | Q9NP16    | mRNA-decapping enzyme 1A [OS=Homo sapiens]                                                 | 1.5           | 3            | 1          | 1      | 1                 | 0                       | 0                               | 1                                            | 0                                        | 0                |                    |                    |                    |                    |                        |                        |                        |                        |
| 2799 | Q8NHA6    | Putative olfactory receptor 2W6 [OS=Homo sapiens]                                          | 1.5           | 5            | 1          | 1      | 1                 | 0                       |                                 |                                              | 1                                        | 0                |                    |                    |                    |                    |                        |                        |                        |                        |
| 2800 | Q86W42    | THO complex subunit 6 homolog [OS=Homo sapiens]                                            | 1.5           | 3            | 1          | 2      | 1                 | 0                       | 0                               | 1                                            | 1                                        | 0                | 4.53.E+06          | 3.08.E+06          | 4.42.E+06          | 5.49.E+06          |                        | 4.51.E+06              | 4.10.E+06              | 3.48.E+06              |
| 2801 | P18074-1  | Tfih basal transcription factor complex helicase xpd subunit [OS=Homo sapiens]             | 1.5           | 1            | 1          | 7      | 1                 | 0                       | 0                               | 1                                            | 1                                        | 0                | 3.15.E+07          | 2.42.E+07          | 3.27.E+07          | 3.30.E+07          | 3.13.E+07              | 3.44.E+07              | 3.85.E+07              | 3.52.E+07              |
| 2802 | O75764    | Transcription elongation factor A protein 3 [OS=Homo sapiens]                              | 1.5           | 3            | 1          | 5      | 1                 | 0                       | 0                               | 1                                            | 1                                        | 0                |                    |                    |                    |                    |                        |                        |                        |                        |
| 2803 | Q86XN6    | Zinc finger protein 761 OS=Homo sapiens OX=9606 GN=ZNF761 PE=1 SV=3                        | 1.5           | 1            | 1          | 1      | 1                 | 0                       |                                 |                                              | 1                                        | 0                | 3.98.E+08          | 3.47.E+08          | 3.96.E+08          | 3.27.E+08          | 2.32.E+08              | 2.42.E+08              | 2.71.E+08              | 2.68.E+08              |
| 2804 | O95602    | DNA-directed RNA polymerase I subunit RPA1 [OS=Homo sapiens]                               | 1.5           | 1            | 1          | 4      | 1                 | 0                       | 0                               | 1                                            | 1                                        | 0                | 3.99.E+06          | 5.00.E+06          | 5.28.E+06          | 5.44.E+06          | 4.73.E+06              | 4.57.E+06              | 4.99.E+06              | 4.49.E+06              |
| 2805 | Q96JM2    | zinc finger protein 462 [OS=Homo sapiens]                                                  | 1.4           | 1            | 1          | 10     | 1                 | 0                       |                                 |                                              | 1                                        | 0                | 7.45.E+07          | 7.45.E+07          | 7.86.E+07          | 7.20.E+07          | 6.28.E+07              | 1.17.E+08              | 1.24.E+08              | 1.23.E+08              |
| 2806 | Q81UH4    | Palmitoyltransferase ZDHHC13 [OS=Homo sapiens]                                             | 1.4           | 1            | 1          | 18     | 1                 | 0                       |                                 |                                              | 1                                        | 0                | 1.06.E+08          | 1.12.E+08          | 1.05.E+08          | 9.08.E+07          | 1.18.E+08              | 1.35.E+08              | 1.27.E+08              | 1.27.E+08              |
| 2807 | P50613    | Cyclin-dependent kinase 7 [OS=Homo sapiens]                                                | 1.4           | 6            | 1          | 4      | 1                 | 0                       | 0                               | 1                                            | 1                                        | 0                | 1.89.E+06          | 2.73.E+06          | 1.82.E+06          | 2.26.E+06          | 3.94.E+06              | 3.02.E+06              | 2.06.E+06              | 2.38.E+06              |
| 2808 | P46063    | ATP-dependent DNA helicase Q1 [OS=Homo sapiens]                                            | 1.4           | 2            | 1          | 3      | 1                 | 0                       | 0                               | 1                                            | 1                                        | 0                | 6.16.E+06          | 4.36.E+06          | 6.72.E+06          | 3.92.E+06          | 1.26.E+07              | 1.05.E+07              | 1.32.E+07              | 1.24.E+07              |
| 2809 | Q9H019    | Transketolase-like protein 2 [OS=Homo sapiens]                                             | 1.4           | 3            | 1          | 1      | 1                 | 0                       |                                 |                                              | 1                                        | 0                | 1.38.E+06          | 1.44.E+06          | 8.26.E+05          | 8.47.E+05          | 1.80.E+06              | 1.76.E+06              | 3.37.E+06              | 1.66.E+06              |
| 2810 | Q8NB78-1  | Lysine-specific histone demethylase 1B [OS=Homo sapiens]                                   | 1.4           | 2            | 1          | 2      | 1                 | 0                       | 0                               | 1                                            | 1                                        | 0                | 7.75.E+05          | 1.39.E+06          | 1.03.E+06          | 7.23.E+05          | 5.14.E+05              | 6.87.E+05              | 6.18.E+05              | 3.90.E+05              |
| 2811 | Q96J65-1  | Multidrug resistance-associated protein 9 [OS=Homo sapiens]                                | 1.4           | 1            | 1          | 3      | 1                 | 0                       |                                 |                                              | 1                                        | 0                | 1.99.E+07          | 1.84.E+07          | 1.91.E+07          | 1.72.E+07          | 2.85.E+07              | 2.77.E+07              | 2.90.E+07              | 3.21.E+07              |
| 2812 | Q8NFD2    | ankyrin repeat and protein kinase domain-containing protein 1 [OS=Homo sapiens]            | 1.4           | 2            | 1          | 1      | 1                 | 0                       |                                 |                                              | 1                                        | 0                | 3.91.E+05          | 4.34.E+05          | 4.84.E+05          | 4.23.E+05          | 2.58.E+05              |                        | 2.74.E+05              | 3.09.E+05              |
| 2813 | Q9BZQ4    | Nicotinamide/nicotinic acid mononucleotide adenylyltransferase 2 [OS=Homo sapiens]         | 1.4           | 5            | 1          | 6      | 1                 | 0                       | 0                               | 1                                            | 1                                        | 0                |                    |                    |                    |                    |                        |                        |                        |                        |
| 2814 | Q5C9Z4    | nucleolar MIF4G domain-containing protein 1 [OS=Homo sapiens]                              | 1.4           | 2            | 1          | 7      | 1                 | 0                       | 0                               | 1                                            | 1                                        | 0                | 7.11.E+05          | 6.17.E+05          | 8.72.E+05          | 4.67.E+05          | 5.89.E+05              | 9.25.E+05              | 7.30.E+05              | 6.88.E+05              |
| 2815 | Q9UIF9-1  | Bromodomain adjacent to zinc finger domain protein 2A [OS=Homo sapiens]                    | 1.4           | 1            | 1          | 10     | 1                 | 0                       | 0                               | 1                                            | 1                                        | 0                | 5.27.E+05          | 3.86.E+05          | 5.07.E+05          | 1.32.E+05          | 4.50.E+05              | 8.40.E+05              | 8.78.E+05              | 5.27.E+05              |
| 2816 | Q5T8P6    | RNA-binding protein 26 [OS=Homo sapiens]                                                   | 1.4           | 1            | 1          | 10     | 1                 | 15                      | 0                               | 1                                            | 1                                        | 0                | 3.55.E+06          | 3.68.E+06          | 3.55.E+06          | 3.45.E+06          |                        | 2.91.E+06              | 2.71.E+06              | 2.79.E+06              |
| 2817 | Q9UG01    | Intraflagellar transport protein 172 homolog [OS=Homo sapiens]                             | 1.3           | 0            | 1          | 7      | 1                 | 54                      |                                 |                                              | 1                                        | 0                | 5.79.E+07          | 3.96.E+07          | 5.30.E+07          | 5.22.E+07          | 6.01.E+07              | 3.85.E+07              | 5.96.E+07              | 4.85.E+07              |
| 2818 | P40126-1  | L-dopachrome tautomerase [OS=Homo sapiens]                                                 | 1.3           | 3            | 1          | 2      | 1                 | 0                       |                                 |                                              | 1                                        | 0                |                    |                    |                    |                    |                        |                        |                        |                        |
| 2819 | A6NK06    | cis-aconitate decarboxylase [OS=Homo sapiens]                                              | 1.3           | 2            | 1          | 2      | 1                 | 0                       | 0                               | 1                                            | 1                                        | 0                | 7.26.E+05          |                    | 2.14.E+06          | 8.76.E+05          | 9.43.E+05              | 1.16.E+06              | 1.33.E+06              | 1.12.E+06              |
| 2820 | Q8TD43-1  | Transient receptor potential cation channel subfamily M member 4 [OS=Homo sapiens]         | 1.3           | 1            | 1          | 7      | 1                 | 0                       | 2                               | 1                                            | 1                                        | 0                | 2.45.E+07          | 2.28.E+07          | 2.10.E+07          | 2.08.E+07          | 2.47.E+07              | 2.22.E+07              | 2.38.E+07              | 2.35.E+07              |
| 2821 | A6NKB5    | Pecanex-like protein 2 [OS=Homo sapiens]                                                   | 1.3           | 0            | 1          | 1      | 1                 | 0                       |                                 |                                              | 1                                        | 0                |                    |                    |                    |                    |                        |                        |                        |                        |
| 2822 | Q07352    | mRNA decay activator protein ZFP36L1 [OS=Homo sapiens]                                     | 1.3           | 5            | 1          | 1      | 1                 | 0                       |                                 |                                              | 1                                        | 0                |                    |                    |                    |                    |                        |                        |                        |                        |
| 2823 | O43292-1  | Glycosylphosphatidylinositol anchor attachment 1 protein [OS=Homo sapiens]                 | 1.3           | 2            | 1          | 1      | 1                 | 0                       |                                 |                                              | 1                                        | 0                | 2.26.E+06          | 3.12.E+06          |                    |                    |                        | 3.48.E+06              | 3.18.E+06              |                        |
| 2824 | P16452-1  | Erythrocyte membrane protein band 4.2 [OS=Homo sapiens]                                    | 1.3           | 2            | 1          | 5      | 1                 | 0                       |                                 |                                              | 1                                        | 0                |                    |                    |                    |                    |                        |                        |                        |                        |
| 2825 | Q5TEJ8    | protein THEMIS2 [OS=Homo sapiens]                                                          | 1.3           | 3            | 1          | 7      | 1                 | 0                       |                                 |                                              | 1                                        | 0                |                    |                    |                    |                    |                        |                        |                        |                        |
| 2826 | Q5TEU4    | Arginine-hydroxylase NDUFAF5, mitochondrial [OS=Homo sapiens]                              | 1.3           | 4            | 1          | 36     | 1                 | 16                      |                                 |                                              | 1                                        | 0                |                    |                    |                    |                    |                        |                        |                        |                        |
| 2827 | Q9ULH0-1  | Kinase D-interacting substrate of 220 kDa [OS=Homo sapiens]                                | 1.3           | 1            | 1          | 4      | 1                 | 0                       |                                 |                                              | 1                                        | 0                | 9.78.E+05          | 1.15.E+06          | 9.25.E+05          | 7.35.E+05          | 2.37.E+06              | 2.38.E+06              | 1.92.E+06              | 2.03.E+06              |
| 2828 | Q5VV63-1  | Attractin-like protein 1 [OS=Homo sapiens]                                                 | 1.2           | 1            | 1          | 1      | 1                 | 0                       |                                 |                                              | 1                                        | 0                |                    |                    |                    |                    |                        |                        |                        |                        |
| 2829 | Q9UQ53-1  | Alpha-1,3-mannosyl-glycoprotein 4-beta-N-acetylglucosaminyltransferase B [OS=Homo sapiens] | 1.2           | 2            | 1          | 4      | 1                 | 0                       |                                 |                                              | 1                                        | 0                |                    |                    | 1.13.E+07          | 5.09.E+06          | 5.07.E+06              | 9.41.E+06              | 8.37.E+06              | 8.65.E+06              |
| 2830 | Q5VST9    | Obscurin [OS=Homo sapiens]                                                                 | 1.2           | 0            | 1          | 42     | 1                 | 13                      | 0                               | 1                                            | 1                                        | 0                | 5.49.E+07          | 4.49.E+07          | 6.52.E+07          | 3.88.E+07          | 5.78.E+07              | 5.26.E+07              | 8.37.E+07              | 7.47.E+07              |
| 2831 | Q92508    | Piezo-type mechanosensitive ion channel component 1 [OS=Homo sapiens]                      | 1.2           | 0            | 1          | 17     | 1                 | 18                      | 0                               | 1                                            | 1                                        | 0                | 9.57.E+07          | 1.11.E+08          | 8.10.E+07          | 8.68.E+07          | 1.19.E+08              | 1.24.E+08              | 1.14.E+08              | 1.10.E+08              |
| 2832 | Q3SXM5    | Inactive hydroxysteroid dehydrogenase-like protein 1 [OS=Homo sapiens]                     | 1.2           | 4            | 1          | 2      | 1                 | 0                       | 0                               | 1                                            | 1                                        | 0                | 2.13.E+06          | 2.20.E+06          | 1.95.E+06          | 1.85.E+06          | 4.26.E+06              | 4.46.E+06              | 4.58.E+06              | 5.49.E+06              |
| 2833 | Q8IYM2    | Schlafen family member 12 [OS=Homo sapiens]                                                | 1.2           | 3            | 1          | 1      | 1                 | 0                       |                                 |                                              | 1                                        | 0                | 1.03.E+07          | 7.61.E+06          | 1.19.E+07          | 9.88.E+06          | 3.71.E+06              | 4.01.E+06              | 4.30.E+06              | 4.20.E+06              |
| 2834 | Q8WVY7    | Ubiquitin-like domain-containing CTD phosphatase 1 [OS=Homo sapiens]                       | 1.2           | 4            | 1          | 2      | 1                 | 0                       | 0                               | 1                                            | 1                                        | 0                | 3.35.E+06          | 3.20.E+06          | 2.89.E+06          | 3.68.E+06          | 6.86.E+06              | 6.19.E+06              | 2.50.E+06              | 7.62.E+06              |
| 2835 | Q14997    | Proteasome activator complex subunit 4 [OS=Homo sapiens]                                   | 1.2           | 1            | 1          | 4      | 1                 | 0                       | 0                               | 1                                            | 1                                        | 0                |                    |                    |                    |                    |                        |                        |                        |                        |
| 2836 | Q9HBA9    | putative N-acetylated-alpha-linked acidic dipeptidase [OS=Homo sapiens]                    | 1.2           | 2            | 1          | 13     | 1                 | 0                       | 0                               | 1                                            | 1                                        | 0                | 1.29.E+07          | 1.05.E+07          | 1.40.E+07          | 1.60.E+07          | 1.38.E+07              | 1.38.E+07              | 1.69.E+07              | 1.46.E+07              |
| 2837 | Q96115-1  | selenocysteine lyase [OS=Homo sapiens]                                                     | 1.2           | 4            | 1          | 4      | 1                 | 0                       | 0                               | 1                                            | 1                                        | 0                |                    |                    |                    |                    |                        |                        |                        |                        |
| 2838 | Q9UJA5-1  | tRNA (adenine(58)-N(1))-methyltransferase non-catalytic subunit TRM6 [OS=Homo sapiens]     | 1.2           | 2            | 1          | 2      | 1                 | 0                       | 0                               | 1                                            | 1                                        | 0                | 8.71.E+06          | 9.78.E+06          | 1.17.E+07          | 8.31.E+06          | 7.29.E+06              | 8.74.E+06              | 1.12.E+07              | 1.06.E+07              |
| 2839 | Q8IYH5-1  | ZZ-type zinc finger-containing protein 3 [OS=Homo sapiens]                                 | 1.2           | 2            | 1          | 5      | 1                 | 0                       | 0                               | 1                                            | 1                                        | 0                | 1.93.E+07          | 1.76.E+07          | 1.92.E+07          | 2.24.E+07          | 2.38.E+07              | 2.56.E+07              | 3.02.E+07              | 2.99.E+07              |
| 2840 | Q7Z4G4    | tRNA (guanine(10)-N2)-methyltransferase homolog [OS=Homo sapiens]                          | 1.2           | 3            | 1          | 10     | 1                 | 0                       |                                 |                                              | 1                                        | 0                | 1.29.E+09          | 1.34.E+09          | 1.25.E+09          | 1.22.E+09          | 1.39.E+09              | 1.46.E+09              | 1.35.E+09              | 1.46.E+09              |

| No.  | Accession | Description                                                         | Sum PEP Score | Coverage [%] | # Peptides | # PSMs | # Unique Peptides | Score Mascot: A5 Mascot | Score Sequest HT: A2 Sequest HT | # Peptides (by Search Engine): A2 Sequest HT | # Peptides (by Search Engine): A5 Mascot | # Razor Peptides | ctrl Abundance s_1 | ctrl Abundance s_2 | ctrl Abundance s_3 | ctrl Abundance s_4 | JAM-A KO Abundance s_1 | JAM-A KO Abundance s_2 | JAM-A KO Abundance s_3 | JAM-A KO Abundance s_4 |
|------|-----------|---------------------------------------------------------------------|---------------|--------------|------------|--------|-------------------|-------------------------|---------------------------------|----------------------------------------------|------------------------------------------|------------------|--------------------|--------------------|--------------------|--------------------|------------------------|------------------------|------------------------|------------------------|
| 2841 | Q8TBB1-1  | E3 ubiquitin-protein ligase LNX [OS=Homo sapiens]                   | 1.2           | 2            | 1          | 2      | 1                 | 0                       |                                 |                                              | 1                                        | 0                | 3.63.E+06          | 4.49.E+06          | 4.90.E+06          | 4.34.E+06          | 6.32.E+06              | 5.97.E+06              | 6.96.E+06              | 6.58.E+06              |
| 2842 | Q96EZ4    | Myeloma-overexpressed gene protein [OS=Homo sapiens]                | 1.2           | 5            | 1          | 1      | 1                 | 0                       |                                 |                                              | 1                                        | 0                | 1.15.E+08          | 1.54.E+08          | 2.16.E+08          | 1.65.E+08          | 1.21.E+08              | 1.51.E+08              | 2.14.E+08              | 2.11.E+08              |
| 2843 | Q6ZT62    | Bargin OS=Homo sapiens OX=9606 GN=BARGIN PE=1 SV=2                  | 1.2           | 5            | 1          | 8      | 1                 | 0                       |                                 |                                              | 1                                        | 0                | 8.35.E+06          | 4.94.E+06          | 3.73.E+06          | 4.34.E+06          | 1.72.E+07              | 1.93.E+07              | 2.16.E+07              | 1.05.E+07              |
| 2844 | Q8TAQ5    | Zinc finger protein 420 [OS=Homo sapiens]                           | 1.1           | 2            | 1          | 1      | 1                 | 0                       |                                 |                                              | 1                                        | 0                |                    |                    |                    |                    |                        |                        |                        |                        |
| 2845 | A6NMB1    | Sialic acid-binding Ig-like lectin 16 [OS=Homo sapiens]             | 1.1           | 1            | 1          | 7      | 1                 | 0                       | 0                               | 1                                            | 1                                        | 0                | 8.33.E+06          | 7.73.E+06          | 1.04.E+07          | 7.59.E+06          | 3.35.E+06              | 3.95.E+06              | 4.24.E+06              | 4.36.E+06              |
| 2846 | Q9BXT2    | voltage-dependent calcium channel gamma-6 subunit [OS=Homo sapiens] | 1.1           | 3            | 1          | 63     | 1                 | 193                     | 0                               | 1                                            | 1                                        | 0                |                    |                    |                    |                    |                        |                        |                        |                        |
| 2847 | P02675    | Fibrinogen beta chain [OS=Homo sapiens]                             | 1.1           | 1            | 1          | 7      | 1                 | 0                       | 0                               | 1                                            | 1                                        | 0                |                    |                    |                    |                    |                        |                        |                        |                        |
| 2848 | Q969F9-1  | Hermansky-pudlak syndrome 3 protein [OS=Homo sapiens]               | 1.1           | 1            | 1          | 1      | 1                 | 0                       |                                 |                                              | 1                                        | 0                | 2.63.E+05          | 1.86.E+05          | 2.98.E+05          | 1.96.E+05          | 2.12.E+05              | 3.82.E+05              | 2.70.E+05              |                        |
| 2849 | Q9UPR3    | Protein SMG5 [OS=Homo sapiens]                                      | 1.1           | 1            | 1          | 3      | 1                 | 0                       |                                 |                                              | 1                                        | 0                | 5.89.E+07          | 6.03.E+07          | 5.94.E+07          | 6.92.E+07          | 6.04.E+07              | 6.28.E+07              | 6.42.E+07              | 6.16.E+07              |
